# Supplementary material for: High cholesterol and low triglycerides are associated with total lumbar bone mineral density among adults aged 50 years and over: The NHANES 2017–2020
Source: Front Med (Lausanne). 2022 Aug 8;9:923730. doi: 10.3389/fmed.2022.923730 (PMC9393595; doi:10.3389/fmed.2022.923730)
Supplement: Supplementary file 3 [file Table_1.XLS]

SEQN	weight2	weight1	Gender	Age	Race	ALT	Albumin	ALP	AST	Bicarbonate	Blood Urea Nitrogen	Chloride	CPK	Creatinine	Globulin	Glucose	GGT	Iron	LDH	Osmolality	Phosphorus	Potassium	Sodium	Total Bilirubin	Total Calcium	Cholesterol	Total Protein	Triglycerides	Uric acid	BMI	Total spine BMD	discomfort in chest	diabetes	Fasting Glucose	osteoporosis	Taken prednisone	cancer	overweight	kidney stones	weak/failing kidneys	Albumin, urine	Creatinine, urine	Albumin creatinine ratio,urine	Arsenic,Urine3	Arsenic,Urine5	Arsenic,Urine	Urine Flow Rate
109263	7891.762435	8951.815567	1	2	5	NA	NA	NA	NA	NA	NA	NA	NA	NA	NA	NA	NA	NA	NA	NA	NA	NA	NA	NA	NA	NA	NA	NA	NA	NA	NA	NA	2	NA	NA	NA	NA	NA	NA	NA	NA	NA	NA	NA	NA	NA	NA
109264	11689.74726	12271.15704	2	13	1	8	4.3	172	18	26	9	102	48	0.57	2.6	4.94	12	83	144	276	4.5	4	139	0.5	9.4	170	6.9	54	3.5	17.6	NA	NA	2	5.38	NA	NA	NA	NA	NA	NA	NA	NA	NA	NA	NA	NA	NA
109265	16273.82594	16658.7642	1	2	3	NA	NA	NA	NA	NA	NA	NA	NA	NA	NA	NA	NA	NA	NA	NA	NA	NA	NA	NA	NA	NA	NA	NA	NA	15	NA	NA	2	NA	NA	NA	NA	NA	NA	NA	NA	NA	NA	NA	NA	NA	NA
109266	7825.646112	8154.968193	2	29	5	15	3.8	74	14	25	8	99	109	0.63	3	4.61	8	51	164	277	3.2	3.6	140	0.5	8.8	199	6.8	86	4.9	37.8	NA	NA	2	NA	NA	NA	2	1	2	2	5.5	36	15.28	0.08	0.56	2.05	1.263
109267	26379.99172	0	2	21	2	NA	NA	NA	NA	NA	NA	NA	NA	NA	NA	NA	NA	NA	NA	NA	NA	NA	NA	NA	NA	NA	NA	NA	NA	NA	NA	NA	2	NA	NA	NA	2	2	2	2	NA	NA	NA	NA	NA	NA	NA
109268	19639.22101	0	2	18	3	NA	NA	NA	NA	NA	NA	NA	NA	NA	NA	NA	NA	NA	NA	NA	NA	NA	NA	NA	NA	NA	NA	NA	NA	NA	NA	NA	2	NA	NA	NA	NA	2	NA	NA	NA	NA	NA	NA	NA	NA	NA
109269	5906.250521	6848.271782	1	2	2	NA	NA	NA	NA	NA	NA	NA	NA	NA	NA	NA	NA	NA	NA	NA	NA	NA	NA	NA	NA	NA	NA	NA	NA	NA	NA	NA	2	NA	NA	NA	NA	NA	NA	NA	NA	NA	NA	NA	NA	NA	NA
109270	4613.057696	4886.930378	2	11	4	NA	NA	NA	NA	NA	NA	NA	NA	NA	NA	NA	NA	NA	NA	NA	NA	NA	NA	NA	NA	NA	NA	NA	NA	30.9	NA	NA	2	NA	NA	NA	NA	NA	NA	NA	4	165	2.42	0.51	0.56	3.25	0.437
109271	8481.589837	8658.732873	1	49	3	8	3.8	88	14	30	8	101	85	0.78	3.5	5.27	12	63	188	279	4	4.3	141	0.5	8.9	148	7.3	101	5	29.7	NA	1	2	5.72	NA	NA	2	2	2	2	2.4	32	7.5	NA	NA	NA	2.876
109272	7037.380216	7872.776233	1	0	1	NA	NA	NA	NA	NA	NA	NA	NA	NA	NA	NA	NA	NA	NA	NA	NA	NA	NA	NA	NA	NA	NA	NA	NA	NA	NA	NA	NA	NA	NA	NA	NA	NA	NA	NA	NA	NA	NA	NA	NA	NA	NA
109273	20171.84777	22163.59685	1	36	3	35	4.6	70	27	27	11	100	48	0.92	2.8	4.94	19	209	129	276	2.7	4.3	139	0.6	9.7	168	7.4	178	5.2	21.9	NA	NA	2	NA	NA	NA	2	1	2	2	4.9	121	4.05	0.08	0.56	5.16	NA
109274	7227.993241	7801.600218	1	68	5	19	4	49	20	28	11	99	93	0.74	2.8	8.49	16	86	123	278	2.7	3.9	138	0.6	9.1	105	6.8	151	5.1	30.2	0	2	1	8.55	2	2	2	1	1	2	12.8	120	10.67	0.08	0.56	2.92	0.516
109275	16372.53397	17610.32683	1	6	3	NA	NA	NA	NA	NA	NA	NA	NA	NA	NA	NA	NA	NA	NA	NA	NA	NA	NA	NA	NA	NA	NA	NA	NA	14.4	NA	NA	1	NA	NA	NA	NA	NA	NA	NA	3.7	20	18.5	NA	NA	NA	0.536
109276	1652.540459	1810.573063	1	0	4	NA	NA	NA	NA	NA	NA	NA	NA	NA	NA	NA	NA	NA	NA	NA	NA	NA	NA	NA	NA	NA	NA	NA	NA	NA	NA	NA	NA	NA	NA	NA	NA	NA	NA	NA	NA	NA	NA	NA	NA	NA	NA
109277	16385.74331	17519.41814	2	12	1	11	4.3	153	20	25	7	100	65	0.46	3	4.72	11	63	160	278	4.1	4.2	141	0.4	9.5	124	7.3	35	5.2	18.6	NA	NA	2	5.11	NA	NA	NA	NA	NA	NA	14.7	244	6.02	NA	NA	NA	0.217
109278	10119.75928	10958.7083	2	6	2	NA	NA	NA	NA	NA	NA	NA	NA	NA	NA	NA	NA	NA	NA	NA	NA	NA	NA	NA	NA	NA	NA	NA	NA	16.3	NA	NA	2	NA	NA	NA	NA	NA	NA	NA	8.4	124	6.77	NA	NA	NA	0.789
109279	11041.63381	11167.79504	2	17	3	9	4.4	134	15	16	13	110	88	0.67	3.3	4.27	13	93	160	286	3.1	3.4	144	0.3	9.8	181	7.7	86	5.2	21	NA	NA	2	NA	NA	NA	NA	2	NA	NA	13.9	251	5.54	NA	NA	NA	NA
109280	14332.24628	16115.05727	2	2	1	NA	NA	NA	NA	NA	NA	NA	NA	NA	NA	NA	NA	NA	NA	NA	NA	NA	NA	NA	NA	NA	NA	NA	NA	16.2	NA	NA	2	NA	NA	NA	NA	NA	NA	NA	NA	NA	NA	NA	NA	NA	NA
109281	2116.528118	2301.303575	2	0	1	NA	NA	NA	NA	NA	NA	NA	NA	NA	NA	NA	NA	NA	NA	NA	NA	NA	NA	NA	NA	NA	NA	NA	NA	NA	NA	NA	NA	NA	NA	NA	NA	NA	NA	NA	NA	NA	NA	NA	NA	NA	NA
109282	28363.01529	31816.3465	1	76	3	17	4.3	74	19	25	18	105	112	0.88	2.8	5.11	24	62	149	290	3.3	4.5	145	0.3	9.1	239	7.1	151	6.9	26.6	1	1	2	5.27	2	1	1	2	2	2	16	192	8.33	NA	NA	NA	0.18
109283	42539.68045	0	1	52	5	NA	NA	NA	NA	NA	NA	NA	NA	NA	NA	NA	NA	NA	NA	NA	NA	NA	NA	NA	NA	NA	NA	NA	NA	NA	NA	1	2	NA	2	2	2	2	2	2	NA	NA	NA	NA	NA	NA	NA
109284	13822.80372	13794.79354	2	44	1	16	3.5	77	15	22	12	103	74	0.78	3.8	5.5	19	42	153	281	3.4	4.1	141	0.3	8.8	215	7.3	125	4.3	39.1	NA	2	2	NA	NA	NA	2	1	2	2	8.2	189	4.34	NA	NA	NA	0.654
109285	27778.64567	29931.00931	1	16	4	NA	NA	NA	NA	NA	NA	NA	NA	NA	NA	NA	NA	NA	NA	NA	NA	NA	NA	NA	NA	NA	NA	NA	NA	40.7	NA	NA	2	NA	NA	NA	NA	1	NA	NA	8.3	183	4.54	NA	NA	NA	0.593
109286	13776.53494	14547.46716	2	33	5	10	2.8	86	13	21	9	101	45	0.55	3.8	4.66	4	26	145	270	4	4.2	136	0.2	8.6	240	6.6	211	3.3	28.9	NA	NA	2	5.11	NA	NA	2	2	2	2	6.8	74	9.19	NA	NA	NA	1.04
109287	7296.432792	8692.74169	2	11	3	NA	NA	NA	NA	NA	NA	NA	NA	NA	NA	NA	NA	NA	NA	NA	NA	NA	NA	NA	NA	NA	NA	NA	NA	19.2	NA	NA	2	NA	NA	NA	NA	NA	NA	NA	13.3	112	11.88	0.08	0.56	5.8	0.447
109288	6125.306254	7144.714446	1	5	2	NA	NA	NA	NA	NA	NA	NA	NA	NA	NA	NA	NA	NA	NA	NA	NA	NA	NA	NA	NA	NA	NA	NA	NA	18.3	NA	NA	2	NA	NA	NA	NA	NA	NA	NA	2.3	37	6.22	0.08	0.56	4.24	NA
109289	1828.133543	2018.367976	1	2	5	NA	NA	NA	NA	NA	NA	NA	NA	NA	NA	NA	NA	NA	NA	NA	NA	NA	NA	NA	NA	NA	NA	NA	NA	17.5	NA	NA	2	NA	NA	NA	NA	NA	NA	NA	NA	NA	NA	NA	NA	NA	NA
109290	3967.693106	4099.841985	2	68	4	19	4.9	74	18	26	18	101	94	0.69	2.7	5.27	30	105	159	287	3.9	3.7	143	0.9	9.9	161	7.6	116	4.2	28.1	0	2	1	5.88	2	2	2	2	2	2	22.4	272	8.24	0.44	0.56	144.72	0.117
109291	15845.54315	17228.61781	2	42	5	11	3.9	117	25	26	14	101	68	0.73	3	5	37	124	151	279	4.1	4	140	0.4	9.3	229	6.9	132	4.2	31.3	NA	2	2	NA	NA	NA	2	1	2	2	16.4	261	6.28	NA	NA	NA	0.193
109292	15941.778	17463.11289	1	58	2	21	3.9	49	18	24	11	102	250	0.95	3	9.71	34	116	148	283	2.3	4.8	140	0.4	9.3	172	6.9	104	7.6	30.5	0	1	1	10	2	2	2	2	2	2	NA	NA	NA	NA	NA	NA	NA
109293	12006.07013	12160.98047	1	44	3	19	4.4	178	21	24	16	98	127	1.06	3.7	4.66	24	62	184	276	3.6	3.7	138	0.4	9.7	187	8.1	223	10.3	30.1	NA	2	2	NA	NA	NA	2	1	2	2	7.2	57	12.63	NA	NA	NA	1.642
109294	2617.289014	2956.808889	2	0	5	NA	NA	NA	NA	NA	NA	NA	NA	NA	NA	NA	NA	NA	NA	NA	NA	NA	NA	NA	NA	NA	NA	NA	NA	NA	NA	NA	NA	NA	NA	NA	NA	NA	NA	NA	NA	NA	NA	NA	NA	NA	NA
109295	9559.577848	9951.368904	2	54	1	14	3.8	58	21	23	15	98	166	0.8	3.1	5.05	14	85	165	278	3	3.9	139	0.1	9.2	230	6.9	195	5.4	24.9	NA	2	2	NA	2	2	2	2	2	2	13	50	26	0.08	0.56	3.48	0.743
109296	2515.973672	2743.6759	1	10	4	NA	NA	NA	NA	NA	NA	NA	NA	NA	NA	NA	NA	NA	NA	NA	NA	NA	NA	NA	NA	NA	NA	NA	NA	19.5	NA	NA	2	NA	NA	NA	NA	NA	NA	NA	2.6	52	5	NA	NA	NA	NA
109297	13785.39915	14974.37289	2	30	5	17	4.3	56	14	23	12	102	70	0.6	3	4.77	64	95	121	280	3.8	4.3	141	0.3	9.7	213	7.3	54	5.5	23.2	NA	NA	2	5.11	NA	NA	2	2	2	2	9.3	120	7.75	NA	NA	NA	0.658
109298	7587.880067	7866.974787	1	68	3	22	4	74	31	24	21	103	65	1.42	2.9	12.32	110	125	122	291	4.2	4.8	141	0.5	9.4	156	6.9	231	5.7	34.2	NA	1	1	NA	2	2	2	1	2	2	102	211	48.34	NA	NA	NA	0.137
109299	5555.401413	0	2	4	5	NA	NA	NA	NA	NA	NA	NA	NA	NA	NA	NA	NA	NA	NA	NA	NA	NA	NA	NA	NA	NA	NA	NA	NA	NA	NA	NA	2	NA	NA	NA	NA	NA	NA	NA	NA	NA	NA	NA	NA	NA	NA
109300	20550.01905	23643.30481	2	54	5	32	4.2	84	24	26	15	106	152	0.58	3.1	5.27	74	82	218	286	3.3	4.1	143	0.3	9	198	7.3	63	4.7	29.6	0	2	2	5.72	2	2	2	2	2	2	2.5	19	13.16	0.08	0.56	5.08	1.377
109301	4309.485311	4813.499237	2	6	4	NA	NA	NA	NA	NA	NA	NA	NA	NA	NA	NA	NA	NA	NA	NA	NA	NA	NA	NA	NA	NA	NA	NA	NA	16.6	NA	NA	2	NA	NA	NA	NA	NA	NA	NA	7.3	123	5.93	NA	NA	NA	NA
109302	1824.224927	2026.343571	2	11	4	NA	NA	NA	NA	NA	NA	NA	NA	NA	NA	NA	NA	NA	NA	NA	NA	NA	NA	NA	NA	NA	NA	NA	NA	23	NA	NA	2	NA	NA	NA	NA	NA	NA	NA	29.3	288	10.17	NA	NA	NA	0.562
109303	3740.39691	3910.238257	1	18	5	13	4.5	131	17	27	16	100	89	0.74	3	4.66	11	119	146	284	4.1	4.2	142	0.4	9.9	157	7.5	70	5	17.9	NA	NA	2	NA	NA	NA	NA	2	NA	NA	1.9	44	4.32	NA	NA	NA	NA
109304	10460.17439	11915.31693	2	9	3	NA	NA	NA	NA	NA	NA	NA	NA	NA	NA	NA	NA	NA	NA	NA	NA	NA	NA	NA	NA	NA	NA	NA	NA	16.3	NA	NA	2	NA	NA	NA	NA	NA	NA	NA	20	108	18.52	NA	NA	NA	NA
109305	6649.793457	7592.522584	1	55	5	NA	NA	NA	NA	NA	NA	NA	NA	NA	NA	NA	NA	NA	NA	NA	NA	NA	NA	NA	NA	NA	NA	NA	NA	20.9	0	2	2	5.83	2	2	2	2	2	2	3.7	44	8.41	NA	NA	NA	0.982
109306	23221.15872	26757.6744	1	2	3	NA	NA	NA	NA	NA	NA	NA	NA	NA	NA	NA	NA	NA	NA	NA	NA	NA	NA	NA	NA	NA	NA	NA	NA	NA	NA	NA	2	NA	NA	NA	NA	NA	NA	NA	NA	NA	NA	NA	NA	NA	NA
109307	15248.7439	16989.21554	1	47	5	14	4	72	22	26	15	104	201	0.71	3	5.22	32	189	128	284	3.2	3.8	142	0.4	8.8	159	7	147	5.7	24.6	NA	1	2	5.72	NA	NA	2	2	2	2	5.8	116	5	NA	NA	NA	0.356
109308	5100.21183	5554.221025	1	1	4	NA	NA	NA	NA	NA	NA	NA	NA	NA	NA	NA	NA	NA	NA	NA	NA	NA	NA	NA	NA	NA	NA	NA	NA	NA	NA	NA	2	NA	NA	NA	NA	NA	NA	NA	NA	NA	NA	NA	NA	NA	NA
109309	24011.45326	27641.01203	1	5	2	NA	NA	NA	NA	NA	NA	NA	NA	NA	NA	NA	NA	NA	NA	NA	NA	NA	NA	NA	NA	NA	NA	NA	NA	16.8	NA	NA	2	NA	NA	NA	NA	NA	NA	NA	3.1	27	11.48	0.08	0.56	0.95	NA
109310	19014.40143	22172.8264	1	8	5	NA	NA	NA	NA	NA	NA	NA	NA	NA	NA	NA	NA	NA	NA	NA	NA	NA	NA	NA	NA	NA	NA	NA	NA	22.4	NA	NA	2	NA	NA	NA	NA	NA	NA	NA	86.8	100	86.8	0.08	0.56	15.89	NA
109311	28442.97699	0	2	36	2	NA	NA	NA	NA	NA	NA	NA	NA	NA	NA	NA	NA	NA	NA	NA	NA	NA	NA	NA	NA	NA	NA	NA	NA	NA	NA	NA	2	NA	NA	NA	2	1	2	2	NA	NA	NA	NA	NA	NA	NA
109312	125710.809	133567.95	2	48	3	18	4.2	61	20	22	19	100	98	0.74	2.9	4.88	18	80	154	279	3.3	3.9	139	0.2	9	177	7.1	69	4.2	23.9	NA	2	2	NA	NA	NA	1	2	2	2	2.6	57	4.56	0.08	0.56	2.71	1.565
109313	89118.34442	101702.7886	1	63	3	24	3.9	109	28	25	15	102	138	0.63	3.3	5.5	79	95	150	280	2.7	4.3	140	0.4	9.3	226	7.2	96	5.1	25.2	1	1	2	5.38	2	2	2	2	2	2	7.8	173	4.51	0.08	0.56	5.64	0.688
109314	4700.640868	5079.997986	1	0	4	NA	NA	NA	NA	NA	NA	NA	NA	NA	NA	NA	NA	NA	NA	NA	NA	NA	NA	NA	NA	NA	NA	NA	NA	NA	NA	NA	NA	NA	NA	NA	NA	NA	NA	NA	NA	NA	NA	NA	NA	NA	NA
109315	7299.490539	7489.193596	2	30	4	18	4.2	57	20	20	11	101	199	0.7	2.6	4.88	32	85	177	280	3.2	4	141	0.2	8.9	153	6.8	122	5.1	31.8	NA	NA	2	NA	NA	NA	2	2	2	2	38	193	19.69	NA	NA	NA	NA
109316	6119.732139	6448.398885	2	62	4	9	3.7	133	10	20	14	101	53	0.76	3.2	6.38	12	41	139	279	3.5	3.9	139	0.3	9	182	6.9	55	3.6	30.5	0	1	1	NA	1	2	2	1	2	2	5.9	68	8.68	0.08	0.56	1.91	0.509
109317	13686.83527	14593.73521	2	28	4	9	4	49	11	25	9	102	86	0.77	3.1	4.94	11	73	133	279	2.4	4.2	141	0.3	9.2	206	7.1	55	4.6	30.1	NA	NA	2	4.88	NA	NA	2	1	2	2	19	253	7.51	0.82	0.56	125.42	0.484
109318	3046.808358	3365.456151	2	5	4	NA	NA	NA	NA	NA	NA	NA	NA	NA	NA	NA	NA	NA	NA	NA	NA	NA	NA	NA	NA	NA	NA	NA	NA	22	NA	NA	2	NA	NA	NA	NA	NA	NA	NA	22.1	192	11.51	0.08	0.56	60.69	NA
109319	10545.76088	11681.71417	1	22	4	21	4.1	42	22	24	12	99	298	0.93	3.3	4.83	31	139	153	275	3.8	3.7	138	0.5	9.1	280	7.4	89	7.9	30.5	NA	NA	2	NA	NA	NA	2	1	2	2	10.3	217	4.75	NA	NA	NA	0.408
109320	6298.858202	6568.732519	2	11	5	NA	NA	NA	NA	NA	NA	NA	NA	NA	NA	NA	NA	NA	NA	NA	NA	NA	NA	NA	NA	NA	NA	NA	NA	31.3	NA	NA	2	NA	NA	NA	NA	NA	NA	NA	122.1	210	58.14	1.35	0.56	7.3	0.358
109321	3886.245638	4204.73603	2	19	4	10	3.5	77	15	25	8	105	79	0.79	3.5	4.5	11	50	166	277	3.2	4.2	140	0.3	8.7	124	7	76	4.4	33.2	NA	NA	2	NA	NA	NA	NA	1	NA	NA	13.1	260	5.04	0.53	0.56	5.1	0.338
109322	14839.48556	14880.30567	2	45	1	13	3.7	45	14	24	14	103	95	0.69	3.2	4.5	21	100	150	281	3.4	4.2	141	1.1	8.7	168	6.9	84	3.4	29.3	NA	1	2	4.94	NA	NA	2	1	1	2	16.7	130	12.85	NA	NA	NA	0.446
109323	19165.2307	21061.65228	1	22	1	25	3.8	94	18	27	10	101	165	0.75	3	5.44	21	63	142	280	3.4	4.3	141	0.4	9	142	6.8	108	7	NA	NA	NA	2	5.77	NA	NA	2	1	2	2	26.7	271	9.85	0.08	0.56	6.99	0.343
109324	10163.5819	11226.90656	2	49	3	8	4	57	15	21	11	103	38	0.71	2.4	4.5	11	85	117	278	3.5	4	140	0.3	8.6	182	6.4	80	5.3	24	NA	2	2	4.77	NA	NA	2	2	2	2	5.7	123	4.63	0.08	0.56	2.42	0.235
109325	8808.441186	10151.65425	1	7	5	NA	NA	NA	NA	NA	NA	NA	NA	NA	NA	NA	NA	NA	NA	NA	NA	NA	NA	NA	NA	NA	NA	NA	NA	13.8	NA	NA	2	NA	NA	NA	NA	NA	NA	NA	4.1	64	6.41	NA	NA	NA	NA
109326	83913.33379	94345.37014	2	44	3	9	4.1	60	16	26	12	103	50	0.88	2.8	4.77	10	96	108	282	4.1	3.8	142	0.5	9.2	178	6.9	79	4.7	21.6	NA	2	2	5.27	NA	NA	2	2	2	2	6.8	81	8.4	0.08	0.56	3.12	0.839
109327	20793.08954	20026.35896	2	58	1	48	4.3	103	27	27	15	100	134	0.82	2.9	5.11	42	103	147	287	4	4.7	144	1.1	9.9	205	7.2	176	4.3	23.7	0	2	2	5.44	2	2	2	2	2	2	3.4	33	10.3	NA	NA	NA	0.721
109328	2445.817726	2713.254057	1	2	5	NA	NA	NA	NA	NA	NA	NA	NA	NA	NA	NA	NA	NA	NA	NA	NA	NA	NA	NA	NA	NA	NA	NA	NA	16.5	NA	NA	2	NA	NA	NA	NA	NA	NA	NA	NA	NA	NA	NA	NA	NA	NA
109329	3032.451177	3322.444777	1	0	4	NA	NA	NA	NA	NA	NA	NA	NA	NA	NA	NA	NA	NA	NA	NA	NA	NA	NA	NA	NA	NA	NA	NA	NA	NA	NA	NA	NA	NA	NA	NA	NA	NA	NA	NA	NA	NA	NA	NA	NA	NA	NA
109330	19197.13663	20618.19805	1	76	5	26	4.1	68	31	24	15	105	69	0.72	3.3	5.55	37	102	127	288	2.7	4	144	0.4	9	167	7.4	77	5.6	23.3	0	2	2	6.05	9	2	2	2	2	2	27.2	89	30.56	NA	NA	NA	0.517
109331	23659.46774	24886.41655	2	19	1	11	3.9	57	18	23	7	102	94	0.52	2.9	4.83	11	69	130	277	3.1	4	140	0.3	8.7	150	6.8	38	2.6	NA	NA	NA	2	5.33	NA	NA	NA	2	NA	NA	8.3	134	6.19	NA	NA	NA	0.438
109332	12644.77658	13614.17816	1	33	2	16	4	99	18	26	18	102	105	1.25	3	4.44	10	96	NA	284	3.8	4.5	142	0.5	8.7	190	7	60	4.9	33.2	NA	NA	2	4.88	NA	NA	2	1	2	2	4.3	160	2.69	NA	NA	NA	NA
109333	15305.7676	16401.59972	2	41	2	14	4.3	61	17	25	14	101	76	0.63	2.5	5.11	8	64	112	278	4	3.8	139	0.3	8.8	139	6.8	93	3.1	26.4	NA	2	2	NA	NA	NA	2	1	2	2	1.9	32	5.94	NA	NA	NA	2.02
109334	21464.41593	25263.68491	2	54	3	13	4.3	88	18	25	13	100	106	0.51	3	4.22	16	97	150	278	3.5	4.3	140	0.4	9.8	239	7.3	122	4.2	24.5	1	2	2	NA	2	2	2	2	1	2	12.2	122	10	0.08	0.56	7.65	0.412
109335	9674.274532	10453.7703	2	55	4	32	3.6	112	32	26	10	101	92	0.84	3.3	5.16	224	154	151	278	4.2	3.7	140	0.8	9.3	187	6.9	131	5.9	39.6	1	1	2	5.44	2	2	2	1	2	2	9.6	210	4.57	NA	NA	NA	0.345
109336	28042.39716	28203.63308	1	35	1	40	4.3	67	17	25	10	100	136	0.74	2.8	5.11	23	36	171	280	3.2	4.4	141	0.2	9.4	233	7.1	326	7.6	33.5	NA	NA	2	NA	NA	NA	2	2	2	2	0.4	21	1.9	NA	NA	NA	2.62
109337	7670.954552	7777.320353	2	48	4	18	3.6	71	16	23	19	103	111	0.88	3.4	5.22	45	69	189	283	4.6	4.2	141	0.2	9	233	7	119	6.9	38.5	NA	2	2	NA	NA	NA	2	1	2	2	5	181	2.76	0.18	0.56	173.51	0.691
109338	5237.435501	5770.576417	2	10	1	NA	NA	NA	NA	NA	NA	NA	NA	NA	NA	NA	NA	NA	NA	NA	NA	NA	NA	NA	NA	NA	NA	NA	NA	24.2	NA	NA	2	NA	NA	NA	NA	NA	NA	NA	7.5	58	12.93	NA	NA	NA	NA
109339	9964.214591	0	1	14	1	NA	NA	NA	NA	NA	NA	NA	NA	NA	NA	NA	NA	NA	NA	NA	NA	NA	NA	NA	NA	NA	NA	NA	NA	NA	NA	NA	2	NA	NA	NA	NA	NA	NA	NA	NA	NA	NA	NA	NA	NA	NA
109340	16692.01481	17860.75054	1	44	5	70	3.7	92	44	31	12	101	295	0.87	3.7	5.88	42	57	NA	287	3.3	3.6	144	0.5	8.6	206	7.4	229	8.2	46.2	NA	2	2	6.11	NA	NA	2	1	2	2	36.2	67	54.03	0.08	0.56	3.4	2.092
109341	21914.04409	25754.45301	2	5	3	NA	NA	NA	NA	NA	NA	NA	NA	NA	NA	NA	NA	NA	NA	NA	NA	NA	NA	NA	NA	NA	NA	NA	NA	15.8	NA	NA	2	NA	NA	NA	NA	NA	NA	NA	11.3	33	34.24	0.08	0.56	1	NA
109342	63669.63904	67850.68278	2	43	3	9	4.1	87	12	25	17	98	66	0.67	3.4	4.94	20	77	121	273	3.8	4.3	136	0.4	9.4	237	7.5	105	3.8	35.5	NA	1	2	5.38	NA	NA	2	1	2	2	7.8	159	4.91	NA	NA	NA	0.662
109343	106214.0337	0	1	69	3	NA	NA	NA	NA	NA	NA	NA	NA	NA	NA	NA	NA	NA	NA	NA	NA	NA	NA	NA	NA	NA	NA	NA	NA	NA	NA	2	2	NA	2	2	1	1	2	2	NA	NA	NA	NA	NA	NA	NA
109344	11078.60508	12973.94298	1	1	3	NA	NA	NA	NA	NA	NA	NA	NA	NA	NA	NA	NA	NA	NA	NA	NA	NA	NA	NA	NA	NA	NA	NA	NA	NA	NA	NA	2	NA	NA	NA	NA	NA	NA	NA	NA	NA	NA	NA	NA	NA	NA
109345	3556.037944	3846.226928	1	0	5	NA	NA	NA	NA	NA	NA	NA	NA	NA	NA	NA	NA	NA	NA	NA	NA	NA	NA	NA	NA	NA	NA	NA	NA	NA	NA	NA	NA	NA	NA	NA	NA	NA	NA	NA	NA	NA	NA	NA	NA	NA	NA
109346	11577.56693	12652.07517	2	23	4	NA	NA	NA	NA	NA	NA	NA	NA	NA	NA	NA	NA	NA	NA	NA	NA	NA	NA	NA	NA	NA	NA	NA	NA	55.1	NA	NA	2	NA	NA	NA	2	1	2	2	9.9	253	3.91	0.08	0.56	47.4	0.641
109347	13140.65261	15488.2659	1	2	2	NA	NA	NA	NA	NA	NA	NA	NA	NA	NA	NA	NA	NA	NA	NA	NA	NA	NA	NA	NA	NA	NA	NA	NA	18.4	NA	NA	2	NA	NA	NA	NA	NA	NA	NA	NA	NA	NA	NA	NA	NA	NA
109348	34811.82742	37103.82064	2	63	3	12	4.6	56	24	27	18	99	119	0.77	2.3	5.33	26	55	175	281	4	3.8	140	0.3	9.1	245	6.9	111	4.2	19.6	0	2	2	NA	2	2	2	2	2	2	2.5	27	9.26	0.08	0.56	2.96	1.462
109349	32903.563	32224.7873	2	47	1	22	3.9	81	14	24	9	99	97	0.58	3.3	4.72	30	106	158	274	3.7	3.5	138	0.3	8.9	192	7.2	114	3.7	40.5	NA	2	2	NA	NA	NA	2	1	2	2	5	71	7.04	0.08	0.56	2	0.872
109350	13693.37698	14768.6033	1	59	3	16	4.3	121	23	27	16	98	173	1.02	3.7	5.77	43	82	198	281	3.7	4.6	140	0.3	9	220	8	58	6.4	36.6	0	2	2	NA	2	2	2	2	2	2	4.8	71	6.76	0.08	0.56	1.11	0.442
109351	12686.95692	13295.17285	1	58	4	25	4.3	59	24	21	11	98	159	1.21	2.7	4.77	37	91	150	274	3.5	4.5	138	0.4	9.8	146	7	55	5.3	23.6	0	1	2	NA	2	2	2	2	2	2	7.4	44	16.82	NA	NA	NA	1.582
109352	7869.179526	9511.039806	1	10	5	NA	NA	NA	NA	NA	NA	NA	NA	NA	NA	NA	NA	NA	NA	NA	NA	NA	NA	NA	NA	NA	NA	NA	NA	14.7	NA	NA	2	NA	NA	NA	NA	NA	NA	NA	11.3	100	11.3	NA	NA	NA	0.387
109353	16173.23201	15944.72831	2	46	5	NA	NA	NA	NA	NA	NA	NA	NA	NA	NA	NA	NA	NA	NA	NA	NA	NA	NA	NA	NA	NA	NA	NA	NA	21.4	NA	2	2	NA	NA	NA	2	2	2	2	9	22	40.91	NA	NA	NA	2.245
109354	7852.874891	0	2	66	2	NA	NA	NA	NA	NA	NA	NA	NA	NA	NA	NA	NA	NA	NA	NA	NA	NA	NA	NA	NA	NA	NA	NA	NA	NA	NA	2	2	NA	2	2	2	2	2	2	NA	NA	NA	NA	NA	NA	NA
109355	3072.661611	0	2	1	4	NA	NA	NA	NA	NA	NA	NA	NA	NA	NA	NA	NA	NA	NA	NA	NA	NA	NA	NA	NA	NA	NA	NA	NA	NA	NA	NA	2	NA	NA	NA	NA	NA	NA	NA	NA	NA	NA	NA	NA	NA	NA
109356	9758.906335	10291.73421	2	1	3	NA	NA	NA	NA	NA	NA	NA	NA	NA	NA	NA	NA	NA	NA	NA	NA	NA	NA	NA	NA	NA	NA	NA	NA	NA	NA	NA	2	NA	NA	NA	NA	NA	NA	NA	NA	NA	NA	NA	NA	NA	NA
109357	4168.110867	4403.29151	2	0	3	NA	NA	NA	NA	NA	NA	NA	NA	NA	NA	NA	NA	NA	NA	NA	NA	NA	NA	NA	NA	NA	NA	NA	NA	NA	NA	NA	NA	NA	NA	NA	NA	NA	NA	NA	NA	NA	NA	NA	NA	NA	NA
109358	132131.7034	138435.9781	2	14	3	NA	NA	NA	NA	NA	NA	NA	NA	NA	NA	NA	NA	NA	NA	NA	NA	NA	NA	NA	NA	NA	NA	NA	NA	23.7	NA	NA	2	NA	NA	NA	NA	NA	NA	NA	1.1	26	4.23	NA	NA	NA	NA
109359	13141.89377	0	1	24	5	NA	NA	NA	NA	NA	NA	NA	NA	NA	NA	NA	NA	NA	NA	NA	NA	NA	NA	NA	NA	NA	NA	NA	NA	NA	NA	NA	2	NA	NA	NA	2	2	2	2	NA	NA	NA	NA	NA	NA	NA
109360	22688.29396	25067.49753	2	14	2	10	4.8	75	18	22	14	100	92	0.43	3.1	4.77	14	94	162	277	3.7	3.9	139	0.4	10	160	7.9	67	3.9	18.3	NA	NA	2	5.38	NA	NA	NA	NA	NA	NA	16	177	9.04	NA	NA	NA	NA
109361	8629.285118	8772.614689	1	17	5	18	4.3	69	14	25	13	104	106	1.14	2.6	4.88	15	41	154	283	3.8	4.5	142	0.3	9.2	130	6.9	78	6.3	49.6	NA	NA	2	NA	NA	NA	NA	1	NA	NA	52	176	29.55	NA	NA	NA	2.121
109362	6007.404244	6028.835095	2	3	4	NA	NA	NA	NA	NA	NA	NA	NA	NA	NA	NA	NA	NA	NA	NA	NA	NA	NA	NA	NA	NA	NA	NA	NA	15.6	NA	NA	2	NA	NA	NA	NA	NA	NA	NA	NA	NA	NA	NA	NA	NA	NA
109363	24714.14134	0	1	29	5	NA	NA	NA	NA	NA	NA	NA	NA	NA	NA	NA	NA	NA	NA	NA	NA	NA	NA	NA	NA	NA	NA	NA	NA	NA	NA	NA	2	NA	NA	NA	2	2	2	2	NA	NA	NA	NA	NA	NA	NA
109364	5672.058525	6442.522972	2	8	5	NA	NA	NA	NA	NA	NA	NA	NA	NA	NA	NA	NA	NA	NA	NA	NA	NA	NA	NA	NA	NA	NA	NA	NA	24.6	NA	NA	2	NA	NA	NA	NA	NA	NA	NA	14.3	137	10.44	NA	NA	NA	0.397
109365	23567.30886	25016.05157	2	49	2	10	3.7	53	13	29	18	100	214	0.94	3	5.22	10	52	134	281	3.7	4.9	140	0.5	9.3	190	6.7	79	5.5	32	NA	2	2	5.55	NA	NA	2	2	2	2	4.6	120	3.83	NA	NA	NA	0.458
109366	14268.66828	16010.96659	2	10	1	NA	NA	NA	NA	NA	NA	NA	NA	NA	NA	NA	NA	NA	NA	NA	NA	NA	NA	NA	NA	NA	NA	NA	NA	17.3	NA	NA	2	NA	NA	NA	NA	NA	NA	NA	912	121	753.72	0.75	0.56	14.83	0.514
109367	7575.058131	8287.717061	1	80	3	15	4.1	96	20	25	15	101	110	1.09	3	5.16	18	114	180	282	4	4.6	141	0.6	9.2	177	7.1	159	6	28.3	1	2	2	5.33	2	2	1	2	2	2	2.9	47	6.17	NA	NA	NA	1.807
109368	3891.621308	4375.044096	2	15	5	NA	NA	NA	NA	NA	NA	NA	NA	NA	NA	NA	NA	NA	NA	NA	NA	NA	NA	NA	NA	NA	NA	NA	NA	26.9	NA	NA	2	NA	NA	NA	NA	NA	NA	NA	15.9	109	14.59	NA	NA	NA	0.663
109369	12296.85292	13635.8449	2	80	2	16	4	105	15	24	30	102	33	1.06	2.4	5.38	18	139	154	293	3.4	4.6	144	0.9	9.7	150	6.4	155	4.7	25.1	NA	1	2	5.72	1	2	2	1	2	2	6	77	7.79	NA	NA	NA	0.795
109370	4396.963881	4949.448276	1	4	4	NA	NA	NA	NA	NA	NA	NA	NA	NA	NA	NA	NA	NA	NA	NA	NA	NA	NA	NA	NA	NA	NA	NA	NA	17.8	NA	NA	2	NA	NA	NA	NA	NA	NA	NA	12.3	102	12.06	0.08	0.56	4.45	NA
109371	5337.058368	5571.469217	1	62	5	25	3.8	80	24	29	10	100	232	1.05	3.3	5.27	41	130	165	278	3.4	4.4	140	0.4	9.1	219	7.1	179	5.9	29.3	0	2	2	5.66	2	2	2	2	2	2	4.1	170	2.41	1.31	0.56	172.11	0.588
109372	19302.21592	20075.46761	2	13	3	18	4.2	238	21	26	9	100	80	0.57	2.3	4.66	11	143	144	283	4.7	3.7	143	0.6	9.5	124	6.5	97	4.8	19.1	NA	NA	2	NA	NA	NA	NA	NA	NA	NA	3.5	34	10.29	NA	NA	NA	1.441
109373	14343.32247	14611.85855	2	30	3	8	3.4	87	17	25	6	99	24	0.57	2.4	12.16	21	75	147	284	3.7	3.8	140	0.3	8.8	200	5.8	92	3.8	27.2	NA	NA	1	NA	NA	NA	2	2	2	2	10.3	106	9.72	NA	NA	NA	0.563
109374	2968.178918	3217.260775	1	5	4	NA	NA	NA	NA	NA	NA	NA	NA	NA	NA	NA	NA	NA	NA	NA	NA	NA	NA	NA	NA	NA	NA	NA	NA	14.7	NA	NA	2	NA	NA	NA	NA	NA	NA	NA	7.1	48	14.79	0.08	0.56	13.56	NA
109375	10320.26414	11627.03499	1	2	3	NA	NA	NA	NA	NA	NA	NA	NA	NA	NA	NA	NA	NA	NA	NA	NA	NA	NA	NA	NA	NA	NA	NA	NA	16.3	NA	NA	2	NA	NA	NA	NA	NA	NA	NA	NA	NA	NA	NA	NA	NA	NA
109376	43093.73939	51348.58842	1	23	3	19	4.4	82	23	29	14	99	135	0.9	2.7	5.11	18	45	148	283	3.3	4.6	142	0.6	9.7	157	7.1	36	3.9	NA	NA	NA	2	5.5	NA	NA	2	2	2	2	28.6	57	50.18	NA	NA	NA	1.535
109377	42210.16822	41412.47406	1	41	3	32	4.3	89	22	22	15	106	156	0.82	3	5.38	70	122	153	286	2.9	4.1	143	0.7	9.3	171	7.3	145	5.5	29.4	NA	2	2	5.55	NA	NA	2	2	1	2	21.3	143	14.9	0.08	0.56	1.93	0.313
109378	42284.21646	45783.3182	1	36	3	42	4.4	74	24	24	10	102	62	0.88	3.2	4.55	19	84	128	281	2.6	4.1	142	0.3	9	180	7.6	160	6	29.9	NA	NA	2	5.38	NA	NA	2	1	2	2	11.9	201	5.92	NA	NA	NA	0.951
109379	35346.54503	44769.8187	2	66	3	8	3.9	68	12	27	18	97	47	0.82	3.4	5.38	13	32	167	283	2.2	4	141	0.4	9.9	178	7.3	63	5.7	33.4	NA	2	3	5.88	1	2	2	1	2	2	4.8	102	4.71	NA	NA	NA	0.911
109380	25637.27001	26852.4198	1	15	1	16	4.2	254	18	24	10	104	211	0.64	2.9	4.61	14	48	163	279	3.2	3.9	141	0.4	9.4	116	7.1	132	6.1	29.1	NA	NA	2	4.94	NA	NA	NA	NA	NA	NA	9.9	190	5.21	NA	NA	NA	0.795
109381	21946.77561	23174.27098	1	13	5	11	4.7	257	20	25	13	101	116	0.6	1.9	5	12	63	168	279	5.6	4	140	0.5	9.4	102	6.6	60	4.1	19.2	NA	NA	2	NA	NA	NA	NA	NA	NA	NA	4	110	3.64	0.08	0.56	4.38	0.233
109382	8443.274765	9440.499355	2	70	1	20	3.8	128	20	26	9	104	36	0.51	3	6.49	25	157	120	285	2.3	4.1	143	1	10.5	163	6.8	110	3.7	35.8	1	2	1	7.16	2	2	2	1	1	2	8.9	67	13.28	NA	NA	NA	0.479
109383	55046.29006	64507.2748	1	8	3	NA	NA	NA	NA	NA	NA	NA	NA	NA	NA	NA	NA	NA	NA	NA	NA	NA	NA	NA	NA	NA	NA	NA	NA	16.3	NA	NA	2	NA	NA	NA	NA	NA	NA	NA	4.7	41	11.46	NA	NA	NA	0.743
109384	39016.61842	41248.23384	2	13	1	11	4.5	109	16	24	9	102	66	0.44	2.7	4.55	10	95	149	279	4.7	4.1	141	0.5	9.9	135	7.2	80	3.6	17.3	NA	NA	2	NA	NA	NA	NA	NA	NA	NA	5.3	81	6.54	0.83	0.56	6.85	0.586
109385	3964.991031	0	2	2	4	NA	NA	NA	NA	NA	NA	NA	NA	NA	NA	NA	NA	NA	NA	NA	NA	NA	NA	NA	NA	NA	NA	NA	NA	NA	NA	NA	2	NA	NA	NA	NA	NA	NA	NA	NA	NA	NA	NA	NA	NA	NA
109386	4709.186597	4952.045038	1	0	3	NA	NA	NA	NA	NA	NA	NA	NA	NA	NA	NA	NA	NA	NA	NA	NA	NA	NA	NA	NA	NA	NA	NA	NA	NA	NA	NA	NA	NA	NA	NA	NA	NA	NA	NA	NA	NA	NA	NA	NA	NA	NA
109387	24751.0937	26423.54279	2	17	5	12	4.1	64	15	24	11	101	141	0.63	3	4.72	11	21	151	272	3.6	4	137	0.2	9.8	156	7.1	57	3.1	23.4	NA	NA	2	NA	NA	NA	NA	2	NA	NA	15.1	147	10.27	NA	NA	NA	NA
109388	3541.292887	3758.471411	2	11	2	NA	NA	NA	NA	NA	NA	NA	NA	NA	NA	NA	NA	NA	NA	NA	NA	NA	NA	NA	NA	NA	NA	NA	NA	18.5	NA	NA	2	NA	NA	NA	NA	NA	NA	NA	25.4	166	15.3	NA	NA	NA	NA
109389	11139.26233	12933.27083	1	56	5	25	4.3	48	30	26	21	98	429	1.02	3.2	6.05	54	118	201	281	3.4	4.1	139	0.4	9.1	203	7.5	151	7.5	26.3	0	2	2	NA	2	2	2	2	2	2	2.3	30	7.67	NA	NA	NA	1.314
109390	6775.204884	6931.067216	2	44	4	9	3.7	103	10	24	12	95	113	0.76	3.3	19.6	17	31	131	288	3.4	3.7	137	0.3	9.4	180	7	329	4.1	38.2	NA	1	1	NA	NA	NA	2	1	2	2	18	42	42.86	0.08	0.56	1.38	1.63
109391	14819.24604	14674.31563	2	56	2	46	4.1	64	33	24	14	99	72	0.61	2.7	5.5	47	69	73	276	3.5	4.2	138	0.3	10	160	6.8	271	6.1	34.1	NA	2	1	NA	2	2	2	1	2	2	2.9	44	6.59	NA	NA	NA	2.11
109392	6993.537331	7392.383739	1	79	1	10	4	89	17	23	26	110	138	1.61	2.9	4.77	20	89	194	295	3.2	4.6	146	0.5	9.2	183	6.9	97	7.3	24.8	0	2	2	4.88	2	2	2	2	2	2	20	85	23.53	NA	NA	NA	0.642
109393	5247.931201	5510.380776	1	76	4	15	3.1	73	18	26	15	104	71	1.5	4.4	6.49	20	78	165	287	2.5	4.7	143	0.2	8.9	164	7.5	143	6.6	21.5	NA	2	1	NA	2	2	2	2	2	1	676	116	582.76	NA	NA	NA	0.134
109394	9360.146917	10118.84941	2	29	4	10	3.6	81	17	23	15	101	104	0.71	3.6	5	33	110	198	276	3.3	3.8	138	0.2	9.1	181	7.2	106	4.2	31.7	NA	NA	2	5.38	NA	NA	2	2	2	2	27.9	584	4.78	NA	NA	NA	0.027
109395	13483.83864	13879.61854	1	56	4	27	4.3	48	23	26	17	101	275	1.09	2.9	5.5	22	116	148	279	3.8	4	139	1	9.4	220	7.2	73	5.3	24	0	2	2	NA	2	2	2	2	2	2	6.4	226	2.83	NA	NA	NA	0.431
109396	12300.47763	12988.80997	2	37	5	15	4.2	55	17	25	11	103	110	0.69	2.7	4.55	12	99	126	282	3.3	4.1	142	0.4	8.8	186	6.9	91	4.4	21.5	NA	NA	2	NA	NA	NA	2	2	2	2	25.4	355	7.15	NA	NA	NA	0.276
109397	27881.58247	27929.49843	2	47	3	26	4.4	75	24	24	12	99	82	0.71	3.1	4.72	24	64	185	278	4.3	3.8	140	0.2	9.3	229	7.5	329	5.5	49	NA	2	2	NA	NA	NA	2	1	2	2	20.9	258	8.1	NA	NA	NA	0.377
109398	4747.639086	5394.657625	2	16	5	14	4.1	69	16	26	11	99	58	0.52	3.6	4.61	14	57	139	276	4.2	4.1	139	0.4	9.9	180	7.7	104	3.9	23.8	NA	NA	2	5.27	NA	NA	NA	2	NA	NA	2.6	18	14.44	NA	NA	NA	0.831
109399	14266.87208	14985.52707	2	15	3	13	4.4	102	21	22	8	107	112	0.85	2.7	4.66	9	115	153	283	4.6	3.6	143	0.5	9.4	183	7.1	99	4.7	19	NA	NA	2	5.16	NA	NA	NA	NA	NA	NA	19.1	322	5.93	0.64	0.56	8.08	0.146
109400	30074.62118	33847.58434	1	9	3	NA	NA	NA	NA	NA	NA	NA	NA	NA	NA	NA	NA	NA	NA	NA	NA	NA	NA	NA	NA	NA	NA	NA	NA	17.6	NA	NA	2	NA	NA	NA	NA	NA	NA	NA	10	57	17.54	NA	NA	NA	NA
109401	52398.9369	0	2	80	3	NA	NA	NA	NA	NA	NA	NA	NA	NA	NA	NA	NA	NA	NA	NA	NA	NA	NA	NA	NA	NA	NA	NA	NA	NA	NA	2	1	NA	2	2	2	2	2	2	NA	NA	NA	NA	NA	NA	NA
109402	32724.30179	0	1	80	3	NA	NA	NA	NA	NA	NA	NA	NA	NA	NA	NA	NA	NA	NA	NA	NA	NA	NA	NA	NA	NA	NA	NA	NA	NA	NA	2	2	NA	2	2	2	1	2	2	NA	NA	NA	NA	NA	NA	NA
109403	21808.0943	24116.31542	1	30	5	9	4.4	51	12	27	14	101	129	1.01	2.8	4.66	16	55	124	281	3.5	4.1	141	0.3	9.3	201	7.2	131	6.8	27.1	NA	NA	2	4.94	NA	NA	2	1	2	2	2.7	62	4.35	0.08	0.56	2.99	2.433
109404	65772.82425	68310.74759	2	23	2	19	4.1	51	17	25	14	104	69	0.66	3.4	4.83	18	73	161	285	3.6	5	143	0.3	9.8	150	7.5	40	4.4	30.7	NA	NA	2	5.33	NA	NA	2	1	2	1	12.3	142	8.66	NA	NA	NA	0.408
109405	37510.19461	40402.1561	2	32	1	17	4.3	49	17	25	12	99	64	0.59	3.2	4.5	15	121	146	280	4.4	3.8	141	0.3	9.7	201	7.5	90	3.3	24.2	NA	NA	2	NA	NA	NA	2	2	2	2	8	117	6.84	NA	NA	NA	0.421
109406	3897.599053	4319.060941	2	1	3	NA	NA	NA	NA	NA	NA	NA	NA	NA	NA	NA	NA	NA	NA	NA	NA	NA	NA	NA	NA	NA	NA	NA	NA	NA	NA	NA	2	NA	NA	NA	NA	NA	NA	NA	NA	NA	NA	NA	NA	NA	NA
109407	9378.557513	0	1	30	1	NA	NA	NA	NA	NA	NA	NA	NA	NA	NA	NA	NA	NA	NA	NA	NA	NA	NA	NA	NA	NA	NA	NA	NA	NA	NA	NA	1	NA	NA	NA	2	2	2	2	NA	NA	NA	NA	NA	NA	NA
109408	12561.02609	12837.96414	1	51	4	18	3.5	98	19	29	25	100	575	2.53	3.5	5.05	56	56	143	287	2.5	3.1	142	0.4	9.1	183	7	220	12.1	40	0	2	2	NA	2	1	2	1	2	1	676.5	347	194.96	NA	NA	NA	NA
109409	8053.296025	8471.297623	2	8	4	NA	NA	NA	NA	NA	NA	NA	NA	NA	NA	NA	NA	NA	NA	NA	NA	NA	NA	NA	NA	NA	NA	NA	NA	21	NA	NA	2	NA	NA	NA	NA	NA	NA	NA	2.8	52	5.38	NA	NA	NA	NA
109410	9568.447587	10860.49346	2	5	1	NA	NA	NA	NA	NA	NA	NA	NA	NA	NA	NA	NA	NA	NA	NA	NA	NA	NA	NA	NA	NA	NA	NA	NA	14.6	NA	NA	2	NA	NA	NA	NA	NA	NA	NA	NA	NA	NA	NA	NA	NA	NA
109411	23366.74764	23374.37487	2	55	4	17	4.3	70	22	25	10	98	74	0.71	3.3	4.77	55	114	156	272	3.5	3.9	137	0.6	10.1	256	7.6	97	3.5	20.2	0	1	2	NA	2	2	2	2	2	2	1.7	33	5.15	NA	NA	NA	2.279
109412	2735.63693	2834.573932	2	7	4	NA	NA	NA	NA	NA	NA	NA	NA	NA	NA	NA	NA	NA	NA	NA	NA	NA	NA	NA	NA	NA	NA	NA	NA	18	NA	NA	2	NA	NA	NA	NA	NA	NA	NA	17.9	102	17.55	NA	NA	NA	0.354
109413	11186.29537	12696.60134	2	59	5	45	4.2	120	28	25	16	101	74	0.54	3.5	6.05	42	152	197	285	4.1	4.3	142	0.5	9.1	230	7.7	185	4.4	28.7	1	2	2	NA	1	2	2	1	2	2	39.5	59	66.95	0.08	0.56	6.97	0.384
109414	10667.50927	11671.75945	2	62	1	34	3.7	152	26	24	25	104	115	1.18	3.5	4.55	77	46	167	287	3.9	3.9	142	0.3	8.9	183	7.2	163	8.7	36.4	0	2	2	NA	1	2	1	1	2	2	13.6	118	11.53	NA	NA	NA	0.419
109415	13687.05172	14418.82309	2	61	4	36	3.4	104	27	26	11	103	196	0.91	3.7	6.88	43	72	163	280	2.9	3.8	140	0.6	8.7	241	7.1	170	7.1	42.8	0	2	2	7.22	2	2	2	1	2	2	13.7	159	8.62	0.08	0.56	3.81	0.321
109416	21227.85449	24735.57233	1	60	3	10	3.9	69	13	25	9	93	51	0.75	3.1	5	23	57	148	266	3.7	3.6	134	0.3	9.4	153	7	127	4.3	24.2	0	2	1	NA	2	2	2	2	2	2	9.4	82	11.46	NA	NA	NA	NA
109417	17506.56571	19059.84841	1	17	4	14	4.3	98	14	28	13	102	175	1.05	2.8	5.22	8	59	110	279	5	4.5	140	0.2	9.5	132	7.1	45	3.6	21	NA	NA	2	NA	NA	NA	NA	2	NA	NA	4.1	162	2.53	NA	NA	NA	NA
109418	3743.570541	4069.426889	2	1	4	NA	NA	NA	NA	NA	NA	NA	NA	NA	NA	NA	NA	NA	NA	NA	NA	NA	NA	NA	NA	NA	NA	NA	NA	NA	NA	NA	2	NA	NA	NA	NA	NA	NA	NA	NA	NA	NA	NA	NA	NA	NA
109419	9220.185751	9893.513573	2	1	3	NA	NA	NA	NA	NA	NA	NA	NA	NA	NA	NA	NA	NA	NA	NA	NA	NA	NA	NA	NA	NA	NA	NA	NA	NA	NA	NA	2	NA	NA	NA	NA	NA	NA	NA	NA	NA	NA	NA	NA	NA	NA
109420	33240.10438	37665.35766	1	3	3	NA	NA	NA	NA	NA	NA	NA	NA	NA	NA	NA	NA	NA	NA	NA	NA	NA	NA	NA	NA	NA	NA	NA	NA	15.8	NA	NA	2	NA	NA	NA	NA	NA	NA	NA	4.7	58	8.1	0.6	0.56	6.3	NA
109421	7358.222225	7861.916236	2	0	4	NA	NA	NA	NA	NA	NA	NA	NA	NA	NA	NA	NA	NA	NA	NA	NA	NA	NA	NA	NA	NA	NA	NA	NA	NA	NA	NA	NA	NA	NA	NA	NA	NA	NA	NA	NA	NA	NA	NA	NA	NA	NA
109422	9814.350285	10968.50088	2	1	4	NA	NA	NA	NA	NA	NA	NA	NA	NA	NA	NA	NA	NA	NA	NA	NA	NA	NA	NA	NA	NA	NA	NA	NA	NA	NA	NA	2	NA	NA	NA	NA	NA	NA	NA	NA	NA	NA	NA	NA	NA	NA
109423	27046.89249	30320.10805	2	28	1	13	4.3	59	13	24	17	104	89	0.63	2.7	5.16	9	91	140	286	4.1	3.9	143	0.3	9.3	170	7	128	2.8	25.7	NA	NA	2	NA	NA	NA	2	2	2	2	2.8	72	3.89	0.67	0.56	6.99	0.207
109424	18244.43029	21741.81059	1	11	3	NA	NA	NA	NA	NA	NA	NA	NA	NA	NA	NA	NA	NA	NA	NA	NA	NA	NA	NA	NA	NA	NA	NA	NA	17.5	NA	NA	2	NA	NA	NA	NA	NA	NA	NA	15.3	217	7.05	0.08	0.56	8.92	NA
109425	14909.57663	17382.93991	1	8	3	NA	NA	NA	NA	NA	NA	NA	NA	NA	NA	NA	NA	NA	NA	NA	NA	NA	NA	NA	NA	NA	NA	NA	NA	18.6	NA	NA	2	NA	NA	NA	NA	NA	NA	NA	10.2	63	16.19	0.08	0.56	3.08	NA
109426	16587.11461	17444.17632	2	61	5	20	4.1	60	19	29	12	103	81	0.63	3.2	5.44	16	113	191	290	4.4	4.2	146	0.4	9.4	165	7.3	119	4.5	27.9	1	2	2	5.61	2	2	2	2	2	2	5.5	64	8.59	0.08	0.56	11.25	1.234
109427	31884.60281	37398.9258	2	11	3	NA	NA	NA	NA	NA	NA	NA	NA	NA	NA	NA	NA	NA	NA	NA	NA	NA	NA	NA	NA	NA	NA	NA	NA	16.9	NA	NA	2	NA	NA	NA	NA	NA	NA	NA	14.6	170	8.59	NA	NA	NA	0.065
109428	16257.5287	18282.53851	1	80	3	10	3.9	104	18	30	25	101	93	1.03	3.4	5.55	19	53	262	286	3.1	4.6	141	0.8	9.2	114	7.3	62	5.1	25.5	NA	1	2	5.88	2	2	2	2	2	2	21.6	131	16.49	0.08	0.56	6.55	0.561
109429	16536.21303	19872.42495	1	27	3	98	3.9	638	107	23	15	102	94	0.93	2.9	4.05	1192	124	153	277	4.2	4.2	139	0.8	8.9	300	6.8	140	7.1	19.6	NA	NA	2	NA	NA	NA	2	2	2	2	10.5	205	5.12	NA	NA	NA	0.335
109430	6076.764985	7142.737296	2	1	5	NA	NA	NA	NA	NA	NA	NA	NA	NA	NA	NA	NA	NA	NA	NA	NA	NA	NA	NA	NA	NA	NA	NA	NA	NA	NA	NA	2	NA	NA	NA	NA	NA	NA	NA	NA	NA	NA	NA	NA	NA	NA
109431	8663.022452	8443.23462	2	45	2	25	4.1	62	24	21	15	103	69	0.74	3.3	5.11	66	83	153	280	3.8	4.1	140	0.2	9	207	7.4	106	5.2	30.3	NA	2	2	NA	NA	NA	2	2	2	2	3.8	44	8.64	NA	NA	NA	1.079
109432	6988.357343	7578.581746	2	44	4	37	4.4	79	24	26	10	102	129	0.87	3.3	5.22	22	40	160	276	3.9	3.8	139	0.2	9.4	202	7.7	38	2.7	19.8	NA	2	2	5.72	NA	NA	2	2	2	2	12.2	218	5.6	0.37	0.56	16.97	0.444
109433	6169.323239	6811.299155	1	5	5	NA	NA	NA	NA	NA	NA	NA	NA	NA	NA	NA	NA	NA	NA	NA	NA	NA	NA	NA	NA	NA	NA	NA	NA	17.4	NA	NA	2	NA	NA	NA	NA	NA	NA	NA	2.9	26	11.15	0.08	0.56	1.08	NA
109434	9117.866662	9758.75534	1	15	4	10	4.6	192	17	24	8	102	184	0.76	2.7	4.22	12	75	137	276	3.8	3.8	140	0.4	9.6	127	7.3	53	4.1	20.9	NA	NA	2	NA	NA	NA	NA	NA	NA	NA	11.3	181	6.24	NA	NA	NA	0.457
109435	14675.71017	15120.44269	1	62	5	19	3	81	36	25	14	106	114	0.87	3.7	5.88	42	202	297	288	3.5	4.2	144	1.5	8.3	86	6.7	108	4.7	41.7	NA	1	1	NA	2	2	2	1	1	2	107	112	95.54	NA	NA	NA	0.31
109436	3465.124395	3494.175689	1	80	5	34	4.7	54	31	26	17	92	268	1.15	2.9	5	36	152	223	269	3.3	4.1	134	0.7	9.8	185	7.6	430	7.4	25.5	0	2	2	NA	1	1	2	2	2	2	87.6	150	58.4	NA	NA	NA	0.403
109437	18288.78916	20492.82447	2	80	2	NA	NA	NA	NA	NA	NA	NA	NA	NA	NA	NA	NA	NA	NA	NA	NA	NA	NA	NA	NA	NA	NA	NA	NA	NA	NA	1	2	NA	2	2	2	2	2	2	NA	NA	NA	NA	NA	NA	NA
109438	3584.773988	3912.87508	2	0	1	NA	NA	NA	NA	NA	NA	NA	NA	NA	NA	NA	NA	NA	NA	NA	NA	NA	NA	NA	NA	NA	NA	NA	NA	NA	NA	NA	NA	NA	NA	NA	NA	NA	NA	NA	NA	NA	NA	NA	NA	NA	NA
109439	11972.15669	12824.37051	2	59	4	19	4.1	117	21	25	10	103	98	0.7	3	6.16	95	77	153	283	2.9	4.3	142	0.9	9.3	186	7.1	71	4.7	32.6	0	2	2	6.27	2	1	2	2	2	2	23.5	135	17.41	0.08	0.56	3.65	0.549
109440	22282.22153	22124.98368	1	18	4	NA	NA	NA	NA	NA	NA	NA	NA	NA	NA	NA	NA	NA	NA	NA	NA	NA	NA	NA	NA	NA	NA	NA	NA	16.6	NA	NA	2	NA	NA	NA	NA	2	NA	NA	20.8	320	6.5	0.6	0.56	5.27	0.82
109441	86649.29774	93014.97908	2	20	3	20	4.3	88	22	25	14	103	86	0.88	2.7	5.16	15	32	141	278	4	4.1	139	0.2	9.1	139	7	61	4.8	18	NA	NA	2	5.38	NA	NA	2	2	2	2	6.3	36	17.5	NA	NA	NA	0.383
109442	2731.454465	3030.123558	1	2	4	NA	NA	NA	NA	NA	NA	NA	NA	NA	NA	NA	NA	NA	NA	NA	NA	NA	NA	NA	NA	NA	NA	NA	NA	15.6	NA	NA	2	NA	NA	NA	NA	NA	NA	NA	NA	NA	NA	NA	NA	NA	NA
109443	1439.623468	1560.432926	1	1	4	NA	NA	NA	NA	NA	NA	NA	NA	NA	NA	NA	NA	NA	NA	NA	NA	NA	NA	NA	NA	NA	NA	NA	NA	NA	NA	NA	2	NA	NA	NA	NA	NA	NA	NA	NA	NA	NA	NA	NA	NA	NA
109444	16017.26853	16879.81819	1	21	4	10	4	78	14	26	6	103	106	1.05	2.8	4.44	26	74	121	285	5.1	3.9	145	0.4	9.3	144	6.8	49	4.9	21.7	NA	NA	2	4.66	NA	NA	2	2	2	2	4	159	2.52	NA	NA	NA	0.155
109445	4234.172519	4605.69199	1	11	4	NA	NA	NA	NA	NA	NA	NA	NA	NA	NA	NA	NA	NA	NA	NA	NA	NA	NA	NA	NA	NA	NA	NA	NA	28.9	NA	NA	2	NA	NA	NA	NA	NA	NA	NA	4.8	168	2.86	NA	NA	NA	0.632
109446	19839.25522	21581.18889	1	12	3	19	4	268	18	25	8	98	139	0.52	3	4.66	13	34	202	273	5.9	4.7	138	0.2	9.4	145	7	90	4.9	24.5	NA	NA	2	NA	NA	NA	NA	NA	NA	NA	15.7	103	15.24	NA	NA	NA	1.091
109447	50390.53343	51420.18811	2	25	3	5	3.9	53	10	22	4	100	62	0.56	2.8	4.94	10	100	147	270	2.9	3.7	137	0.4	9	146	6.7	95	1.7	26.3	NA	NA	2	5.55	NA	NA	2	1	2	2	4.2	53	7.92	NA	NA	NA	NA
109448	11164.06838	13319.25699	1	0	5	NA	NA	NA	NA	NA	NA	NA	NA	NA	NA	NA	NA	NA	NA	NA	NA	NA	NA	NA	NA	NA	NA	NA	NA	NA	NA	NA	NA	NA	NA	NA	NA	NA	NA	NA	NA	NA	NA	NA	NA	NA	NA
109449	18295.68007	19149.73321	1	13	4	10	4.5	208	20	24	10	100	85	0.64	3.5	5.44	17	89	147	275	4.8	3.9	138	0.3	9.9	134	8	70	5.2	21.3	NA	NA	2	NA	NA	NA	NA	NA	NA	NA	21.2	230	9.22	NA	NA	NA	0.292
109450	4616.310332	4862.353194	1	29	5	13	4.5	56	18	25	12	104	272	0.9	2.5	5	14	96	131	281	4.1	4	141	0.2	9.2	143	7	73	3.6	21.5	NA	NA	2	NA	NA	NA	2	2	2	1	24.9	66	37.73	NA	NA	NA	1.295
109451	9679.377261	10713.47266	1	37	4	NA	NA	NA	NA	NA	NA	NA	NA	NA	NA	NA	NA	NA	NA	NA	NA	NA	NA	NA	NA	NA	NA	NA	NA	42	NA	NA	3	NA	NA	NA	2	1	2	2	6	323	1.86	0.27	0.56	37.53	NA
109452	5883.004555	6642.687456	1	1	2	NA	NA	NA	NA	NA	NA	NA	NA	NA	NA	NA	NA	NA	NA	NA	NA	NA	NA	NA	NA	NA	NA	NA	NA	NA	NA	NA	2	NA	NA	NA	NA	NA	NA	NA	NA	NA	NA	NA	NA	NA	NA
109453	5560.518359	5957.617489	1	7	4	NA	NA	NA	NA	NA	NA	NA	NA	NA	NA	NA	NA	NA	NA	NA	NA	NA	NA	NA	NA	NA	NA	NA	NA	NA	NA	NA	2	NA	NA	NA	NA	NA	NA	NA	3.9	52	7.5	0.45	0.56	4.03	NA
109454	11041.52593	12158.46682	2	25	4	29	3.8	67	22	25	6	106	169	0.51	3.3	6.05	19	51	167	287	4.4	3.7	145	0.3	8.8	128	7.1	62	7.3	50.9	NA	NA	2	6.55	NA	NA	2	1	2	2	17.6	73	24.11	NA	NA	NA	2.038
109455	23733.46285	25884.8865	1	40	3	26	4.3	82	20	24	16	106	97	1.05	2.9	5.22	25	62	135	286	2.9	4.3	143	0.2	9.3	228	7.2	299	6.9	25.9	NA	2	2	NA	NA	NA	2	2	2	2	10.2	222	4.59	NA	NA	NA	0.561
109456	18111.02326	18717.8832	1	13	1	17	4.9	264	30	23	16	98	660	0.64	2.9	4.55	18	88	261	276	4.3	3.8	138	0.4	9.6	171	7.8	58	6.7	22.7	NA	NA	2	NA	NA	NA	NA	NA	NA	NA	3.7	94	3.94	NA	NA	NA	1.782
109457	50587.4578	55969.07015	1	76	3	17	4.1	80	12	25	17	92	87	0.89	3	5.61	21	122	107	272	3.6	4	135	0.7	9.2	224	7.1	71	4.3	32.7	1	1	2	6.33	2	2	2	1	2	2	6.9	143	4.83	NA	NA	NA	1.333
109458	4698.785859	5077.707641	1	18	5	26	4.9	94	18	24	11	100	86	0.59	2.9	4.5	25	115	171	278	3.8	4.4	140	0.5	9.8	128	7.8	60	5.1	21	NA	NA	2	NA	NA	NA	NA	2	NA	NA	2.9	43	6.74	NA	NA	NA	0.504
109459	26231.87759	29975.83633	1	32	5	34	4.2	63	21	24	14	99	219	1.01	3.6	5.05	26	101	130	276	3.8	4.3	138	0.3	9.4	243	7.8	392	9	43.3	NA	NA	2	NA	NA	NA	2	1	2	2	59.5	316	18.83	NA	NA	NA	0.696
109460	16837.26945	0	2	80	3	NA	NA	NA	NA	NA	NA	NA	NA	NA	NA	NA	NA	NA	NA	NA	NA	NA	NA	NA	NA	NA	NA	NA	NA	NA	NA	2	2	NA	1	2	1	2	2	2	NA	NA	NA	NA	NA	NA	NA
109461	6807.839542	0	2	8	3	NA	NA	NA	NA	NA	NA	NA	NA	NA	NA	NA	NA	NA	NA	NA	NA	NA	NA	NA	NA	NA	NA	NA	NA	NA	NA	NA	2	NA	NA	NA	NA	NA	NA	NA	NA	NA	NA	NA	NA	NA	NA
109462	5946.668855	6300.152822	1	0	3	NA	NA	NA	NA	NA	NA	NA	NA	NA	NA	NA	NA	NA	NA	NA	NA	NA	NA	NA	NA	NA	NA	NA	NA	NA	NA	NA	NA	NA	NA	NA	NA	NA	NA	NA	NA	NA	NA	NA	NA	NA	NA
109463	7510.481764	7647.600541	1	0	3	NA	NA	NA	NA	NA	NA	NA	NA	NA	NA	NA	NA	NA	NA	NA	NA	NA	NA	NA	NA	NA	NA	NA	NA	NA	NA	NA	NA	NA	NA	NA	NA	NA	NA	NA	NA	NA	NA	NA	NA	NA	NA
109464	13274.84822	14257.93452	1	30	5	20	4.7	69	18	26	17	101	113	0.77	3.5	4.77	40	134	143	284	3.5	4.2	142	0.5	9.1	205	8.2	127	5.9	31.8	NA	NA	2	5.5	NA	NA	2	1	2	2	37.7	186	20.27	2.66	0.56	24.27	0.543
109465	11042.26991	11782.0947	1	17	3	9	4.4	101	13	27	12	104	154	0.81	2.8	5.22	10	126	124	284	3.2	4.3	143	0.5	9.8	122	7.2	88	5.8	24.3	NA	NA	2	5.44	NA	NA	NA	2	NA	NA	6.5	176	3.69	NA	NA	NA	0.861
109466	22808.26562	25029.94448	1	40	1	81	4.3	91	50	28	13	98	77	0.77	3.4	4.77	90	94	144	275	4.8	3.7	138	0.6	9.6	213	7.7	182	6.7	26.2	NA	2	2	NA	NA	NA	2	2	2	2	7.2	124	5.81	NA	NA	NA	0.084
109467	76993.76243	87630.05491	1	21	3	16	4.4	56	18	25	15	103	215	0.99	2.5	4.66	11	137	139	279	3.2	4.2	140	0.5	9.4	158	6.9	56	5	36.3	NA	NA	2	NA	NA	NA	2	1	2	2	0.7	23	3.04	NA	NA	NA	3.297
109468	12535.07564	14054.45475	1	60	3	16	4.2	83	14	20	11	107	120	0.51	2.6	5.11	21	103	191	282	3.5	3.7	142	0.5	9.3	217	6.8	103	4.9	43	0	2	2	NA	2	2	2	2	2	2	12.5	278	4.5	NA	NA	NA	0.146
109469	1817.275913	1954.964442	1	3	4	NA	NA	NA	NA	NA	NA	NA	NA	NA	NA	NA	NA	NA	NA	NA	NA	NA	NA	NA	NA	NA	NA	NA	NA	14.9	NA	NA	2	NA	NA	NA	NA	NA	NA	NA	NA	NA	NA	NA	NA	NA	NA
109470	7112.926009	7766.752009	2	1	4	NA	NA	NA	NA	NA	NA	NA	NA	NA	NA	NA	NA	NA	NA	NA	NA	NA	NA	NA	NA	NA	NA	NA	NA	NA	NA	NA	2	NA	NA	NA	NA	NA	NA	NA	NA	NA	NA	NA	NA	NA	NA
109471	9790.34403	10263.58807	1	14	2	18	4.5	240	22	26	13	102	246	0.84	3.2	5.33	25	32	188	279	4.4	4.5	140	0.2	10	158	7.7	38	4.8	22.1	NA	NA	2	5.66	NA	NA	NA	NA	NA	NA	3.1	77	4.03	NA	NA	NA	0.522
109472	23759.28784	23874.46948	1	34	1	64	4.1	87	33	25	16	103	347	0.81	3.3	5.61	40	39	NA	284	2.8	4.3	142	0.2	9.2	243	7.4	423	6	35.7	NA	NA	2	5.88	NA	NA	2	1	2	2	5.3	98	5.41	1.84	0.56	4.99	0.583
109473	40406.92563	42320.53484	1	19	3	56	4.5	57	31	23	13	102	281	0.94	3.1	5.33	28	68	173	281	5.2	4.1	141	0.4	9.8	153	7.6	121	4.9	33.9	NA	NA	2	NA	NA	NA	NA	1	NA	NA	11.9	283	4.2	NA	NA	NA	NA
109474	14670.5782	17761.19216	2	80	3	28	4.2	89	33	25	36	107	216	0.79	2.6	6.99	26	124	183	295	3.2	4.4	143	0.5	8.9	148	6.8	162	3.7	27.6	0	2	2	7.05	1	2	1	2	2	2	18.1	124	14.6	0.08	0.56	21.6	0.337
109475	16570.61825	17906.24012	1	9	1	NA	NA	NA	NA	NA	NA	NA	NA	NA	NA	NA	NA	NA	NA	NA	NA	NA	NA	NA	NA	NA	NA	NA	NA	19.5	NA	NA	2	NA	NA	NA	NA	NA	NA	NA	9.8	36	27.22	0.08	0.56	1.23	NA
109476	1939.022315	2310.538761	2	8	5	NA	NA	NA	NA	NA	NA	NA	NA	NA	NA	NA	NA	NA	NA	NA	NA	NA	NA	NA	NA	NA	NA	NA	NA	27.5	NA	NA	2	NA	NA	NA	NA	NA	NA	NA	6.4	73	8.77	NA	NA	NA	0.541
109477	9875.14338	10033.90226	2	6	4	NA	NA	NA	NA	NA	NA	NA	NA	NA	NA	NA	NA	NA	NA	NA	NA	NA	NA	NA	NA	NA	NA	NA	NA	14.4	NA	NA	2	NA	NA	NA	NA	NA	NA	NA	24.9	46	54.13	NA	NA	NA	0.955
109478	37996.26185	39528.59957	2	27	3	10	3.7	55	16	26	10	105	268	0.66	3.1	5.88	5	52	126	284	3.8	4.6	143	0.2	8.9	193	6.8	77	4	26.1	NA	NA	2	6.27	NA	NA	2	2	1	2	11	121	9.09	0.08	0.56	6.44	0.807
109479	17491.66766	18337.17702	1	17	1	50	5	107	29	23	14	99	176	0.86	3.4	4.66	46	119	174	288	4.5	5	145	0.7	10.5	191	8.4	96	7.2	28.7	NA	NA	2	NA	NA	NA	NA	2	NA	NA	3.7	19	19.47	NA	NA	NA	NA
109480	14305.0854	15519.54337	1	30	4	59	4.1	64	29	26	12	95	418	0.75	3.2	14.21	57	88	130	282	3.6	4.1	137	0.3	9.7	229	7.3	135	7.2	61.9	NA	NA	1	14.9	NA	NA	2	1	2	2	21.4	241	8.88	0.24	0.56	5.66	0.846
109481	12020.19908	12228.19848	1	60	2	10	3.8	64	16	26	18	103	55	0.84	3.1	4.88	26	62	144	284	3.3	4.3	142	0.4	9.3	215	6.9	232	4.3	27.7	0	2	2	NA	2	2	2	1	2	2	2.1	56	3.75	0.08	0.56	2.96	1.775
109482	71903.51764	76868.98527	2	48	3	17	3.4	47	21	24	9	104	249	0.78	3.3	5.11	7	94	170	278	3.2	4.1	140	0.2	8.6	205	6.7	110	4.8	27.8	NA	2	2	5.66	NA	NA	2	2	2	2	1.9	36	5.28	0.08	0.56	6.54	0.41
109483	49297.9768	68569.7294	2	76	3	11	3.9	70	15	24	18	93	46	0.81	3.6	6.33	26	94	209	269	4.1	4.4	133	0.5	9.6	105	7.5	230	4.7	38.7	0	2	1	NA	2	2	2	1	2	2	7.8	72	10.83	NA	NA	NA	0.824
109484	5335.841126	5890.840281	2	3	4	NA	NA	NA	NA	NA	NA	NA	NA	NA	NA	NA	NA	NA	NA	NA	NA	NA	NA	NA	NA	NA	NA	NA	NA	15.9	NA	NA	2	NA	NA	NA	NA	NA	NA	NA	11.5	135	8.52	0.08	0.56	4.6	NA
109485	30198.68846	31499.25864	2	47	2	14	3.6	81	16	24	10	105	81	0.62	3.7	5.5	31	32	133	277	3	4.1	139	0.2	8.9	195	7.3	58	3.2	NA	NA	2	2	5.77	NA	NA	2	1	2	2	6.9	115	6	0.08	0.56	3.49	0.465
109486	7015.868851	7506.572056	1	65	2	27	4.3	97	22	24	15	102	130	0.8	2.5	5.33	21	141	133	282	3.6	3.9	141	0.8	9.5	177	6.8	273	3.7	27.4	0	2	2	NA	2	2	2	2	2	2	4	78	5.13	NA	NA	NA	0.646
109487	6187.593636	7083.643401	1	0	4	NA	NA	NA	NA	NA	NA	NA	NA	NA	NA	NA	NA	NA	NA	NA	NA	NA	NA	NA	NA	NA	NA	NA	NA	NA	NA	NA	NA	NA	NA	NA	NA	NA	NA	NA	NA	NA	NA	NA	NA	NA	NA
109488	5907.795599	6306.881125	1	40	4	19	3	39	21	27	13	103	187	1.15	2.6	5.55	15	130	133	280	3.3	4.2	140	0.5	8.5	189	5.6	61	8.8	26.6	NA	2	2	5.88	NA	NA	2	2	2	2	8.8	272	3.24	NA	NA	NA	0.449
109489	25464.13688	0	1	80	3	NA	NA	NA	NA	NA	NA	NA	NA	NA	NA	NA	NA	NA	NA	NA	NA	NA	NA	NA	NA	NA	NA	NA	NA	NA	NA	2	2	NA	2	2	2	2	2	2	NA	NA	NA	NA	NA	NA	NA
109490	4105.767387	4268.063945	1	77	4	NA	NA	NA	NA	NA	NA	NA	NA	NA	NA	NA	NA	NA	NA	NA	NA	NA	NA	NA	NA	NA	NA	NA	NA	45.4	NA	1	1	NA	2	2	2	1	2	1	803	97	827.84	NA	NA	NA	0.726
109491	5203.422026	5585.261154	2	0	1	NA	NA	NA	NA	NA	NA	NA	NA	NA	NA	NA	NA	NA	NA	NA	NA	NA	NA	NA	NA	NA	NA	NA	NA	NA	NA	NA	NA	NA	NA	NA	NA	NA	NA	NA	NA	NA	NA	NA	NA	NA	NA
109492	8512.201215	9471.273504	1	9	4	NA	NA	NA	NA	NA	NA	NA	NA	NA	NA	NA	NA	NA	NA	NA	NA	NA	NA	NA	NA	NA	NA	NA	NA	14.8	NA	NA	2	NA	NA	NA	NA	NA	NA	NA	5	123	4.07	NA	NA	NA	0.097
109493	5445.067837	6030.266931	1	8	4	NA	NA	NA	NA	NA	NA	NA	NA	NA	NA	NA	NA	NA	NA	NA	NA	NA	NA	NA	NA	NA	NA	NA	NA	15.6	NA	NA	2	NA	NA	NA	NA	NA	NA	NA	8.2	77	10.65	0.72	0.56	7.3	NA
109494	7630.890816	9295.844771	2	5	5	NA	NA	NA	NA	NA	NA	NA	NA	NA	NA	NA	NA	NA	NA	NA	NA	NA	NA	NA	NA	NA	NA	NA	NA	13.8	NA	NA	2	NA	NA	NA	NA	NA	NA	NA	9.4	26	36.15	0.08	0.56	1.27	NA
109495	171689.4366	174712.4273	1	52	3	48	4.3	95	34	24	16	94	314	0.84	2.5	6.05	55	76	119	266	4.1	3.9	132	0.5	9.4	240	6.8	735	5	34.9	0	2	2	NA	2	2	2	1	2	2	27.4	24	114.17	NA	NA	NA	2.65
109496	163443.9521	189197.4043	1	50	3	32	3.6	113	25	24	14	105	178	0.98	3.6	5.66	40	73	145	284	2.6	4.1	142	0.5	8.8	148	7.2	66	5.8	38.5	0	1	2	6	2	2	2	1	2	1	8.4	245	3.43	NA	NA	NA	0.591
109497	9048.362095	10350.7305	2	48	4	11	3.5	92	17	25	14	103	93	0.92	3.7	5.61	12	36	151	280	3.6	3.9	140	0.1	9	193	7.2	57	3.5	29.6	NA	2	2	NA	NA	NA	2	2	2	2	3.5	44	7.95	NA	NA	NA	NA
109498	10827.14684	11900.81758	1	0	3	NA	NA	NA	NA	NA	NA	NA	NA	NA	NA	NA	NA	NA	NA	NA	NA	NA	NA	NA	NA	NA	NA	NA	NA	NA	NA	NA	NA	NA	NA	NA	NA	NA	NA	NA	NA	NA	NA	NA	NA	NA	NA
109499	55140.94432	57700.67326	2	17	3	15	4.5	92	16	25	8	103	70	0.73	2.7	4.88	12	126	159	279	3.8	4.1	141	0.4	9.6	171	7.2	62	3.8	27.3	NA	NA	2	NA	NA	NA	NA	2	NA	NA	1.9	26	7.31	0.08	0.56	1.07	1.754
109500	11527.57764	15636.59681	2	80	3	17	3.5	154	33	21	24	101	53	1.07	3.7	5.22	48	58	174	281	3.9	4.5	139	0.3	8.7	153	7.2	255	7.5	31	NA	2	2	NA	2	2	2	2	2	2	11	35	31.43	NA	NA	NA	0.716
109501	32607.03641	32364.273	1	45	1	51	4.3	73	33	21	12	103	89	0.76	3.4	5.83	116	113	141	278	3.6	4.4	139	0.6	9.3	261	7.7	184	6.9	34.6	NA	2	2	NA	NA	NA	2	1	2	2	20.2	232	8.71	NA	NA	NA	0.531
109502	22453.89989	24330.13804	2	29	1	13	4.1	66	15	25	13	103	519	0.83	2.6	4.39	16	57	171	282	3.2	4	142	0.1	9.2	161	6.7	222	4.1	30	NA	NA	2	NA	NA	NA	2	1	1	2	9.3	162	5.74	0.13	0.56	5.19	1.25
109503	10459.94185	11022.12101	1	71	3	36	4.1	57	35	26	13	100	41	0.8	3.1	5.55	73	184	121	276	3.4	4.3	138	1.1	9.5	156	7.2	129	7	27.4	0	2	2	6.11	2	2	1	2	2	2	13.4	113	11.86	NA	NA	NA	0.149
109504	8537.324722	9683.204165	1	53	4	24	4.4	80	26	26	18	96	629	1.28	3.3	15.76	67	78	194	288	3.8	4.3	138	0.6	10	208	7.7	190	6.2	29	0	2	1	NA	2	2	2	2	2	2	3.4	47	7.23	NA	NA	NA	NA
109505	2825.350251	2965.16746	2	60	4	NA	NA	NA	NA	NA	NA	NA	NA	NA	NA	NA	NA	NA	NA	NA	NA	NA	NA	NA	NA	NA	NA	NA	NA	NA	NA	2	1	NA	2	2	2	2	1	2	NA	NA	NA	NA	NA	NA	NA
109506	4806.151877	5543.083597	1	7	5	NA	NA	NA	NA	NA	NA	NA	NA	NA	NA	NA	NA	NA	NA	NA	NA	NA	NA	NA	NA	NA	NA	NA	NA	15.9	NA	NA	2	NA	NA	NA	NA	NA	NA	NA	24.8	118	21.02	1.84	0.56	24.77	NA
109507	6259.29671	7597.019544	2	16	5	13	4.6	91	19	23	7	100	99	0.51	3.1	4.44	8	40	179	273	3.2	4.1	138	0.3	9.5	128	7.7	62	2.7	23.9	NA	NA	2	NA	NA	NA	NA	2	NA	NA	NA	NA	NA	NA	NA	NA	NA
109508	218279.8078	223255.6022	2	39	3	48	3.8	70	36	25	13	104	42	0.54	2.7	5.33	43	55	134	281	4.3	4.8	141	0.3	9.5	168	6.5	97	5.5	38.2	NA	NA	2	NA	NA	NA	2	1	2	2	3.4	60	5.67	0.08	0.56	2.41	1.485
109509	2555.992851	2800.74693	1	2	4	NA	NA	NA	NA	NA	NA	NA	NA	NA	NA	NA	NA	NA	NA	NA	NA	NA	NA	NA	NA	NA	NA	NA	NA	16.8	NA	NA	2	NA	NA	NA	NA	NA	NA	NA	NA	NA	NA	NA	NA	NA	NA
109510	24714.14134	28089.28511	1	28	5	18	4.3	86	23	27	18	98	374	1.32	2.8	4.94	25	63	100	275	4.3	3.8	137	0.4	9.5	260	7.1	116	5.9	24.7	NA	NA	2	5.27	NA	NA	2	2	2	2	2.2	85	2.59	0.66	0.56	8.18	1.468
109511	6109.058867	6651.089532	1	13	4	14	4.2	260	21	27	10	101	215	0.58	3.2	5.22	24	104	210	278	4.4	4.3	140	0.5	9.8	167	7.4	52	3.2	23	NA	NA	2	5.61	NA	NA	NA	NA	NA	NA	5	134	3.73	0.49	0.56	8.94	0.573
109512	26267.50801	26946.93507	1	42	4	24	3.9	71	39	24	14	103	2680	1.32	3.6	5.77	23	146	178	276	4	4.3	138	0.8	9.2	144	7.5	68	8.2	38.5	NA	2	2	6	NA	NA	2	2	2	2	5.6	244	2.3	NA	NA	NA	1.014
109513	36825.13114	39486.30396	2	48	3	14	3.9	80	14	26	16	103	52	0.6	2.8	6.05	13	47	160	285	3.8	4.4	142	0.6	9	156	6.7	100	5.5	46	NA	2	1	6.27	NA	NA	2	1	2	2	10.3	162	6.36	1.16	0.56	10.1	0.423
109514	4200.090782	4489.271915	1	12	4	NA	NA	NA	NA	NA	NA	NA	NA	NA	NA	NA	NA	NA	NA	NA	NA	NA	NA	NA	NA	NA	NA	NA	NA	19	NA	NA	2	NA	NA	NA	NA	NA	NA	NA	NA	NA	NA	NA	NA	NA	NA
109515	13903.27429	16372.43756	1	1	1	NA	NA	NA	NA	NA	NA	NA	NA	NA	NA	NA	NA	NA	NA	NA	NA	NA	NA	NA	NA	NA	NA	NA	NA	NA	NA	NA	2	NA	NA	NA	NA	NA	NA	NA	NA	NA	NA	NA	NA	NA	NA
109516	2910.748736	3327.788099	1	0	4	NA	NA	NA	NA	NA	NA	NA	NA	NA	NA	NA	NA	NA	NA	NA	NA	NA	NA	NA	NA	NA	NA	NA	NA	NA	NA	NA	NA	NA	NA	NA	NA	NA	NA	NA	NA	NA	NA	NA	NA	NA	NA
109517	14173.4518	16532.278	1	1	1	NA	NA	NA	NA	NA	NA	NA	NA	NA	NA	NA	NA	NA	NA	NA	NA	NA	NA	NA	NA	NA	NA	NA	NA	NA	NA	NA	2	NA	NA	NA	NA	NA	NA	NA	NA	NA	NA	NA	NA	NA	NA
109518	30277.71895	32206.89551	2	25	5	12	4.1	57	15	22	12	103	135	0.64	3.4	5.16	13	117	155	283	2.9	4.2	142	0.4	9.2	193	7.5	76	4.2	26.1	NA	NA	2	NA	NA	NA	2	1	2	2	35.2	199	17.69	NA	NA	NA	0.445
109519	6322.129646	6662.805656	1	55	4	22	3.5	56	14	25	19	99	342	0.81	2.8	6.61	37	101	132	277	3.3	4.4	137	0.3	8.9	256	6.3	125	7.3	42.4	0	1	2	6.94	2	2	2	1	2	2	117.6	141	83.4	0.08	0.56	25.25	0.796
109520	9477.542821	9813.99071	1	80	4	11	3.9	40	14	29	22	103	94	1.99	3.2	6.11	20	93	161	291	4	4.6	144	1.1	9.7	234	7.1	113	9.2	29	1	2	2	6.72	2	2	2	1	2	1	15.3	190	8.05	NA	NA	NA	0.319
109521	4395.478038	4396.853963	1	4	4	NA	NA	NA	NA	NA	NA	NA	NA	NA	NA	NA	NA	NA	NA	NA	NA	NA	NA	NA	NA	NA	NA	NA	NA	16.6	NA	NA	2	NA	NA	NA	NA	NA	NA	NA	6.7	19	35.26	0.08	0.56	2.67	NA
109522	14208.13718	16694.78054	1	1	3	NA	NA	NA	NA	NA	NA	NA	NA	NA	NA	NA	NA	NA	NA	NA	NA	NA	NA	NA	NA	NA	NA	NA	NA	NA	NA	NA	2	NA	NA	NA	NA	NA	NA	NA	NA	NA	NA	NA	NA	NA	NA
109523	32511.2288	38980.70001	2	77	3	NA	NA	NA	NA	NA	NA	NA	NA	NA	NA	NA	NA	NA	NA	NA	NA	NA	NA	NA	NA	NA	NA	NA	NA	27.9	0	2	2	NA	1	2	1	2	2	2	18.1	63	28.73	NA	NA	NA	0.082
109524	15816.78845	16517.41469	2	16	2	10	4.2	99	15	25	8	104	89	0.67	3.1	5	8	87	176	279	3.9	4.1	141	0.3	9.1	140	7.3	43	4.1	NA	NA	NA	2	4.16	NA	NA	NA	2	NA	NA	9.6	210	4.57	NA	NA	NA	NA
109525	9078.392959	10321.85854	1	24	5	17	3.7	91	18	23	10	103	50	0.87	3.4	5.83	14	68	139	281	2.9	3.9	141	0.4	9.1	186	7.1	121	6.1	34.4	NA	NA	2	NA	NA	NA	2	1	2	2	7.1	201	3.53	NA	NA	NA	0.325
109526	8393.421949	8519.372754	2	31	4	12	3.7	64	13	25	14	106	110	0.65	3.5	4.16	24	75	174	286	3.1	3.6	144	0.4	8.7	172	7.2	69	4.1	38.9	NA	NA	2	NA	NA	NA	2	1	2	2	30.8	262	11.76	NA	NA	NA	0.167
109527	4577.190017	4734.163015	2	69	4	17	3.9	79	20	24	10	102	390	0.63	3.2	4.61	11	41	254	279	4.3	3.7	141	0.2	9.1	184	7.1	58	2.8	22.9	0	2	2	NA	2	2	2	2	2	2	3.7	71	5.21	NA	NA	NA	0.183
109528	6377.964845	6817.095138	1	17	4	12	4.3	147	11	28	7	102	244	0.82	3.8	4.94	26	87	116	282	4	4.8	143	0.5	9.8	164	8.1	71	4.4	24	NA	NA	2	5.33	NA	NA	NA	2	NA	NA	7.3	258	2.83	0.14	0.56	9.13	0.293
109529	18402.59109	18837.88279	1	4	3	NA	NA	NA	NA	NA	NA	NA	NA	NA	NA	NA	NA	NA	NA	NA	NA	NA	NA	NA	NA	NA	NA	NA	NA	15.7	NA	NA	2	NA	NA	NA	NA	NA	NA	NA	11.1	98	11.33	0.3	0.56	6.14	NA
109530	25949.57758	27351.37104	2	49	1	18	3.4	112	19	24	9	103	58	0.68	4.2	5.94	14	34	124	282	3.3	4.2	142	0.3	9.3	179	7.6	135	4.4	32.8	NA	2	2	6.22	NA	NA	2	1	2	2	12.1	160	7.56	NA	NA	NA	0.468
109531	14377.21817	15902.16045	1	32	5	29	4	53	20	26	10	102	234	0.61	3	5.11	35	95	132	280	3.9	4.2	141	0.4	9.2	196	7	129	5.6	39.8	NA	NA	2	5.72	NA	NA	2	1	2	2	32.9	148	22.23	NA	NA	NA	NA
109532	16811.42466	18648.01669	1	70	3	23	4	60	26	27	13	100	426	1.02	2.1	4.83	12	77	143	279	4.1	3.8	140	1.2	8.9	160	6.1	73	4.4	29.1	1	2	2	NA	2	2	1	1	2	2	1.1	37	2.97	NA	NA	NA	3.079
109533	3645.097219	0	1	6	4	NA	NA	NA	NA	NA	NA	NA	NA	NA	NA	NA	NA	NA	NA	NA	NA	NA	NA	NA	NA	NA	NA	NA	NA	NA	NA	NA	2	NA	NA	NA	NA	NA	NA	NA	NA	NA	NA	NA	NA	NA	NA
109534	4746.278155	5235.685666	2	77	4	NA	NA	NA	NA	NA	NA	NA	NA	NA	NA	NA	NA	NA	NA	NA	NA	NA	NA	NA	NA	NA	NA	NA	NA	28.1	NA	2	1	NA	2	2	2	2	2	1	NA	NA	NA	NA	NA	NA	NA
109535	7001.653317	0	1	3	3	NA	NA	NA	NA	NA	NA	NA	NA	NA	NA	NA	NA	NA	NA	NA	NA	NA	NA	NA	NA	NA	NA	NA	NA	NA	NA	NA	2	NA	NA	NA	NA	NA	NA	NA	NA	NA	NA	NA	NA	NA	NA
109536	83106.71424	92168.50329	2	48	3	13	3.8	67	15	29	10	101	34	0.82	2.6	4.5	13	77	116	279	3.6	4.3	141	0.4	9	176	6.4	66	3.8	24	NA	2	2	4.77	NA	NA	2	2	2	2	9.1	107	8.5	1.72	0.56	3.06	0.364
109537	9650.824302	0	2	34	5	NA	NA	NA	NA	NA	NA	NA	NA	NA	NA	NA	NA	NA	NA	NA	NA	NA	NA	NA	NA	NA	NA	NA	NA	NA	NA	NA	2	NA	NA	NA	2	1	2	2	NA	NA	NA	NA	NA	NA	NA
109538	27843.88072	30325.42563	2	66	3	23	4.2	88	24	27	10	106	66	0.75	3.2	5.61	20	81	134	286	3.5	4.1	144	0.5	10.1	214	7.4	145	5.5	30.2	1	2	2	6.11	2	2	2	2	2	2	8.7	136	6.4	0.08	0.56	5.17	0.341
109539	53913.07701	55219.9366	2	19	3	12	4	72	15	24	12	103	76	0.62	3.1	5.61	13	88	116	276	3.5	3.7	138	0.5	9.1	198	7.1	218	4.6	35.9	NA	NA	3	NA	NA	NA	NA	1	NA	NA	3.9	86	4.53	NA	NA	NA	NA
109540	16665.45381	18889.14915	2	9	4	NA	NA	NA	NA	NA	NA	NA	NA	NA	NA	NA	NA	NA	NA	NA	NA	NA	NA	NA	NA	NA	NA	NA	NA	24.5	NA	NA	2	NA	NA	NA	NA	NA	NA	NA	18.5	237	7.81	0.46	0.56	7.6	1.14
109541	3784.598133	3899.47546	2	35	4	13	3.7	73	13	30	7	101	83	0.61	3.3	5.5	17	33	148	276	3.1	3.6	139	0.2	9.1	197	7	81	3.7	32.7	NA	NA	2	5.83	NA	NA	2	1	2	2	8.1	127	6.38	0.08	0.56	2.56	1.085
109542	8879.178862	9311.839377	2	18	1	14	4.1	56	18	21	10	109	79	0.75	2.9	5	12	57	154	287	3.1	4.2	145	0.3	8.9	165	7	107	7.3	38.9	NA	NA	2	5.33	NA	NA	NA	1	NA	NA	7.2	187	3.85	0.08	1.01	6.15	0.424
109543	12981.94017	14550.4331	2	1	5	NA	NA	NA	NA	NA	NA	NA	NA	NA	NA	NA	NA	NA	NA	NA	NA	NA	NA	NA	NA	NA	NA	NA	NA	NA	NA	NA	2	NA	NA	NA	NA	NA	NA	NA	NA	NA	NA	NA	NA	NA	NA
109544	28086.05346	42110.53913	2	76	3	13	3.6	78	17	25	31	107	59	1.25	3.4	6.22	16	53	183	300	4.1	5	147	0.4	9.2	156	7	165	5.9	42.1	0	2	1	6.77	2	2	2	1	2	2	380	96	395.83	NA	NA	NA	0.815
109545	13564.65602	14207.58913	2	36	5	31	3.6	102	22	25	8	97	51	0.56	3.8	5.66	28	42	163	267	2.6	3.4	134	0.3	8.6	210	7.4	180	5.3	31.8	NA	NA	2	6.22	NA	NA	2	1	2	2	2.2	22	10	NA	NA	NA	2.082
109546	3966.881932	4583.776371	1	2	4	NA	NA	NA	NA	NA	NA	NA	NA	NA	NA	NA	NA	NA	NA	NA	NA	NA	NA	NA	NA	NA	NA	NA	NA	15.8	NA	NA	2	NA	NA	NA	NA	NA	NA	NA	NA	NA	NA	NA	NA	NA	NA
109547	20500.07779	22498.19689	2	5	3	NA	NA	NA	NA	NA	NA	NA	NA	NA	NA	NA	NA	NA	NA	NA	NA	NA	NA	NA	NA	NA	NA	NA	NA	15.8	NA	NA	2	NA	NA	NA	NA	NA	NA	NA	4.5	16	28.13	0.08	0.56	48.17	NA
109548	21878.49096	23608.83503	2	25	4	18	3.9	76	15	27	12	104	169	0.8	3.3	4.77	25	49	152	280	4.7	4.3	141	0.1	9.2	153	7.2	75	4.9	42.1	NA	NA	2	5.33	NA	NA	2	2	2	2	3.6	148	2.43	1.34	0.56	10.47	0.578
109549	83497.16871	96634.77696	1	22	3	31	4.5	82	23	30	12	102	120	1.1	2.7	4.88	24	97	157	293	4.4	3.8	148	0.8	9.8	171	7.2	94	7.4	35.7	NA	NA	2	5.16	NA	NA	2	1	2	2	22.5	431	5.22	NA	NA	NA	0.374
109550	75665.23019	73042.92065	2	64	3	21	3.8	99	14	24	17	101	74	0.89	3.5	3.89	10	92	137	276	4	4.5	138	0.3	9.4	280	7.3	190	5.6	37.3	1	2	2	NA	2	1	2	1	2	2	2.1	59	3.56	0.08	0.56	6.73	0.605
109551	12094.70952	12949.82889	1	65	5	6	4.2	99	12	22	13	102	44	1.28	3.3	5.38	26	107	129	285	3.2	4.2	143	1.8	9.3	192	7.5	104	7.3	23.1	1	2	2	NA	2	2	2	2	2	2	8.4	210	4	0.08	0.56	29.9	0.124
109552	20658.388	21909.8997	1	74	3	39	3.9	63	31	23	23	102	206	1.14	3.4	8.94	37	77	162	285	3.7	4.2	139	0.1	9.4	272	7.3	328	8.1	34	0	1	1	9.66	2	2	2	1	2	2	42.1	169	24.91	NA	NA	NA	0.532
109553	4108.229708	4184.510866	2	9	4	NA	NA	NA	NA	NA	NA	NA	NA	NA	NA	NA	NA	NA	NA	NA	NA	NA	NA	NA	NA	NA	NA	NA	NA	15.1	NA	NA	2	NA	NA	NA	NA	NA	NA	NA	337.5	133	253.76	NA	NA	NA	NA
109554	32817.1155	35137.42034	1	21	4	17	4.3	130	49	30	9	101	1852	0.98	3.3	4.5	15	103	253	275	3.6	3.8	139	1.6	9.5	163	7.6	51	8	19.5	NA	NA	2	NA	NA	NA	2	2	2	2	22.2	363	6.12	NA	NA	NA	0.376
109555	6534.597808	6827.813092	2	22	5	12	4.4	41	15	26	14	102	76	0.65	3.1	6	11	69	129	279	3.3	3.7	139	0.4	9.2	131	7.5	36	4.3	19.6	NA	NA	2	NA	NA	NA	2	2	2	2	9	72	12.5	NA	NA	NA	0.716
109556	20337.56164	21520.09694	2	15	2	11	4.1	145	16	27	9	103	125	0.63	3.2	5.33	12	30	149	285	4.9	4.3	144	0.2	9.5	159	7.3	79	4.7	17.6	NA	NA	2	5.72	NA	NA	NA	NA	NA	NA	13.7	64	21.41	0.08	0.56	2.65	0.783
109557	5528.213535	5814.255847	1	17	5	12	4.4	273	17	26	15	100	173	0.75	3	4.5	15	75	145	277	4.6	4	139	0.2	9.3	127	7.4	161	5.3	21.5	NA	NA	2	NA	NA	NA	NA	2	NA	NA	10.2	292	3.49	NA	NA	NA	0.937
109558	51010.86099	56402.61349	1	57	3	22	3.9	92	21	22	13	96	113	0.75	3	21.04	24	121	164	286	3.9	4.3	135	1	8.5	135	6.9	323	4.7	29.1	0	1	1	22.2	2	2	2	1	2	2	51.3	200	25.65	NA	NA	NA	0.598
109559	7221.953482	8506.190419	2	2	3	NA	NA	NA	NA	NA	NA	NA	NA	NA	NA	NA	NA	NA	NA	NA	NA	NA	NA	NA	NA	NA	NA	NA	NA	15.3	NA	NA	2	NA	NA	NA	NA	NA	NA	NA	NA	NA	NA	NA	NA	NA	NA
109560	40465.31294	41558.6393	1	34	1	22	3.6	59	26	28	16	105	232	1.36	3.2	5.44	12	52	132	284	3.8	4.4	142	0.3	9.2	182	6.8	56	7.3	27	NA	NA	2	5.77	NA	NA	2	2	2	2	530.5	92	576.63	NA	NA	NA	1.563
109561	20441.25812	0	2	30	4	NA	NA	NA	NA	NA	NA	NA	NA	NA	NA	NA	NA	NA	NA	NA	NA	NA	NA	NA	NA	NA	NA	NA	NA	NA	NA	NA	2	NA	NA	NA	2	2	2	2	NA	NA	NA	NA	NA	NA	NA
109562	43355.37949	52057.28065	2	80	3	20	3.9	62	21	28	25	108	302	0.75	2.6	5.16	10	86	210	295	2.6	4.1	146	0.2	9.2	119	6.5	126	4.3	29	1	2	2	NA	1	2	2	2	2	2	16.5	114	14.47	0.08	0.56	4.98	NA
109563	55583.14464	59380.123	2	36	1	NA	NA	NA	NA	NA	NA	NA	NA	NA	NA	NA	NA	NA	NA	NA	NA	NA	NA	NA	NA	NA	NA	NA	NA	39.1	NA	NA	1	11.2	NA	NA	2	1	2	2	4.3	46	9.35	0.08	0.56	3	1.959
109564	18454.25931	20135.32957	1	19	3	11	4.4	90	14	23	24	102	131	1	2.5	5.16	10	74	112	281	4	3.8	139	0.4	9.5	174	6.9	93	5.1	23.8	NA	NA	2	NA	NA	NA	NA	2	NA	NA	5.2	160	3.25	NA	NA	NA	1.178
109565	7251.532316	8453.867824	1	80	3	10	3.6	57	13	30	27	102	87	1.43	3.2	7.16	14	64	158	294	3.8	4.4	144	0.3	9.2	151	6.8	127	6.4	33.2	1	1	1	7.77	2	2	2	2	2	9	21.7	130	16.69	NA	NA	NA	0.521
109566	7508.23644	7913.888153	1	11	1	NA	NA	NA	NA	NA	NA	NA	NA	NA	NA	NA	NA	NA	NA	NA	NA	NA	NA	NA	NA	NA	NA	NA	NA	19.6	NA	NA	2	NA	NA	NA	NA	NA	NA	NA	8.5	188	4.52	NA	NA	NA	NA
109567	23608.16272	25353.66923	1	49	3	13	4	48	14	29	14	101	158	1.14	3	5.33	14	122	136	280	2.3	4	140	0.5	9.4	182	7	63	4.3	29.5	NA	2	2	5.72	NA	NA	2	2	2	2	6.1	57	10.7	NA	NA	NA	1.203
109568	16794.34837	17625.67753	2	32	4	16	3.9	46	14	24	12	103	155	0.69	3.5	5.44	25	371	151	279	3.5	4.1	140	0.2	9.7	161	7.4	111	5.3	43.6	NA	NA	2	5.88	NA	NA	2	1	2	2	36.5	143	25.52	NA	NA	NA	NA
109569	31880.65915	35936.8487	1	7	3	NA	NA	NA	NA	NA	NA	NA	NA	NA	NA	NA	NA	NA	NA	NA	NA	NA	NA	NA	NA	NA	NA	NA	NA	16.1	NA	NA	2	NA	NA	NA	NA	NA	NA	NA	6.6	65	10.15	NA	NA	NA	0.569
109570	42437.65612	45049.85833	2	78	3	15	4.1	92	18	29	28	98	102	1.01	2.5	5.33	16	89	131	285	3.8	4	140	0.2	10.4	129	6.6	336	6.1	25.5	1	2	2	NA	2	2	2	2	2	2	3.6	61	5.9	NA	NA	NA	3.727
109571	5646.402665	6098.607785	2	28	5	29	3.8	113	22	26	9	104	143	0.64	3.4	4.88	96	33	96	276	3.4	4.2	139	0.2	9.2	172	7.2	70	6.4	35.6	NA	NA	2	5.55	NA	NA	2	1	2	2	14.6	198	7.37	0.08	0.56	22.67	0.864
109572	17734.98611	18163.55294	2	12	3	20	4.7	120	19	22	10	103	145	0.66	2.5	4.66	16	113	151	278	4.2	3.9	140	0.3	9.9	247	7.2	209	6.7	29.6	NA	NA	2	NA	NA	NA	NA	NA	NA	NA	12.5	283	4.42	0.79	0.56	4.95	NA
109573	3642.694821	4206.522561	2	1	4	NA	NA	NA	NA	NA	NA	NA	NA	NA	NA	NA	NA	NA	NA	NA	NA	NA	NA	NA	NA	NA	NA	NA	NA	NA	NA	NA	2	NA	NA	NA	NA	NA	NA	NA	NA	NA	NA	NA	NA	NA	NA
109574	12235.52073	13420.40896	2	55	5	77	4.7	90	59	23	20	97	159	0.6	2.9	7.27	39	58	136	280	4.4	3.7	138	0.2	10.1	302	7.6	446	7.8	22.4	0	2	1	NA	2	2	2	2	2	2	50.8	157	32.36	NA	NA	NA	0.351
109575	11953.18975	13371.868	2	5	3	NA	NA	NA	NA	NA	NA	NA	NA	NA	NA	NA	NA	NA	NA	NA	NA	NA	NA	NA	NA	NA	NA	NA	NA	16	NA	NA	2	NA	NA	NA	NA	NA	NA	NA	NA	NA	NA	NA	NA	NA	NA
109576	8779.786076	9638.158577	2	11	2	NA	NA	NA	NA	NA	NA	NA	NA	NA	NA	NA	NA	NA	NA	NA	NA	NA	NA	NA	NA	NA	NA	NA	NA	23.1	NA	NA	2	NA	NA	NA	NA	NA	NA	NA	7.8	195	4	NA	NA	NA	0.59
109577	9035.631003	9930.334815	2	74	2	14	3.5	98	17	24	20	102	56	0.69	3.8	5.66	17	55	178	288	3.6	4.3	143	0.2	9.3	201	7.3	194	5.1	39.4	0	1	2	NA	2	2	1	1	2	2	31.7	79	40.13	NA	NA	NA	0.142
109578	20434.995	0	1	80	3	NA	NA	NA	NA	NA	NA	NA	NA	NA	NA	NA	NA	NA	NA	NA	NA	NA	NA	NA	NA	NA	NA	NA	NA	NA	NA	1	1	NA	2	2	1	1	2	2	NA	NA	NA	NA	NA	NA	NA
109579	19439.68064	19090.23617	2	42	3	6	3.8	81	10	22	13	97	50	1.08	3.2	4.5	10	37	143	271	4.7	4	136	0.3	9.3	185	7	155	4.2	27.2	NA	2	2	NA	NA	NA	2	2	2	2	16.6	263	6.31	NA	NA	NA	0.339
109580	20741.15709	22255.92235	2	39	4	9	3.7	53	13	25	8	103	35	0.59	3.5	4.61	57	22	149	284	3.3	3.5	144	0.4	8.7	151	7.2	172	5.1	23.4	NA	NA	2	5.05	NA	NA	2	2	2	2	18.7	151	12.38	0.45	0.56	6.17	0.578
109581	25842.44192	27429.99817	1	43	3	23	4.1	65	19	25	13	106	93	0.95	2.5	4.88	17	111	177	286	3.3	4	144	0.4	9	187	6.6	167	5.9	27.9	NA	2	2	NA	NA	NA	2	2	2	2	7.5	93	8.06	NA	NA	NA	0.607
109582	37142.24977	39769.68347	1	14	3	14	4.4	269	26	22	28	100	381	0.76	2.6	4.72	14	91	195	277	4.9	4.3	136	0.3	9.7	194	7	60	4.2	19.9	NA	NA	2	NA	NA	NA	NA	NA	NA	NA	4.2	56	7.5	NA	NA	NA	2.762
109583	8285.177578	9327.76853	2	2	1	NA	NA	NA	NA	NA	NA	NA	NA	NA	NA	NA	NA	NA	NA	NA	NA	NA	NA	NA	NA	NA	NA	NA	NA	17	NA	NA	2	NA	NA	NA	NA	NA	NA	NA	NA	NA	NA	NA	NA	NA	NA
109584	12907.01166	13764.59049	1	9	3	NA	NA	NA	NA	NA	NA	NA	NA	NA	NA	NA	NA	NA	NA	NA	NA	NA	NA	NA	NA	NA	NA	NA	NA	15.1	NA	NA	2	NA	NA	NA	NA	NA	NA	NA	45	170	26.47	NA	NA	NA	0.308
109585	12930.51403	13885.39232	1	20	4	18	4.7	66	20	30	16	99	363	1.24	3.1	4.77	22	28	156	284	4.6	4.2	142	0.2	9.4	110	7.8	92	5.1	28.2	NA	NA	2	NA	NA	NA	2	2	2	2	10.3	198	5.2	NA	NA	NA	0.396
109586	6413.43147	0	1	0	4	NA	NA	NA	NA	NA	NA	NA	NA	NA	NA	NA	NA	NA	NA	NA	NA	NA	NA	NA	NA	NA	NA	NA	NA	NA	NA	NA	NA	NA	NA	NA	NA	NA	NA	NA	NA	NA	NA	NA	NA	NA	NA
109587	19087.13223	23444.07588	2	74	3	15	4	71	15	25	15	103	114	0.69	2.8	5.11	45	149	148	287	4.4	3.9	144	0.8	9.5	204	6.8	174	6.6	40.2	0	1	2	NA	2	2	2	1	2	2	4.3	89	4.83	NA	NA	NA	0.705
109588	10169.79152	10349.8719	1	71	3	25	4.2	82	37	25	16	103	546	0.95	3	5	17	106	242	284	3.5	4.8	142	1.3	9.4	149	7.2	55	5.2	21.3	0	2	2	5.27	2	2	2	2	2	2	74.3	123	60.41	NA	NA	NA	0.178
109589	10001.25205	10455.92666	2	13	4	9	4	138	11	24	11	103	53	0.7	2.8	5.22	9	78	122	279	4	4.5	140	0.3	9.5	167	6.8	54	3.2	31.2	NA	NA	2	5.55	NA	NA	NA	NA	NA	NA	11.4	253	4.51	NA	NA	NA	NA
109590	10590.80232	11236.0985	1	37	4	NA	NA	NA	NA	NA	NA	NA	NA	NA	NA	NA	NA	NA	NA	NA	NA	NA	NA	NA	NA	NA	NA	NA	NA	22.3	NA	NA	2	NA	NA	NA	2	2	2	2	8.7	255	3.41	NA	NA	NA	0.488
109591	5058.534693	5354.862547	1	68	1	20	4.3	70	19	28	14	100	114	0.81	3.2	5.44	19	47	128	282	3.2	4	141	0.3	9.4	172	7.5	146	5.8	29.8	0	2	2	NA	2	2	2	1	2	2	1	14	7.14	NA	NA	NA	2.333
109592	8594.702532	9460.099293	2	62	1	18	3.7	104	18	23	18	105	68	0.54	2.7	6.22	8	75	NA	289	4.4	4	144	0.2	9.1	219	6.4	359	3.3	26.9	NA	1	2	NA	2	2	2	2	2	2	8.1	100	8.1	NA	NA	NA	0.551
109593	37130.74632	39073.24594	1	52	5	28	4	81	26	25	14	99	141	0.73	3.9	4.77	30	225	153	275	3.4	4.1	138	0.8	8.9	142	7.9	94	6.1	25	0	2	2	5.22	2	2	2	2	2	2	8.5	181	4.7	NA	NA	NA	0.171
109594	7997.991351	8155.079431	1	79	3	NA	NA	NA	NA	NA	NA	NA	NA	NA	NA	NA	NA	NA	NA	NA	NA	NA	NA	NA	NA	NA	NA	NA	NA	21.7	0	2	2	4.72	2	2	2	2	2	2	140.3	70	200.43	NA	NA	NA	0.918
109595	17629.16252	19916.57756	2	5	3	NA	NA	NA	NA	NA	NA	NA	NA	NA	NA	NA	NA	NA	NA	NA	NA	NA	NA	NA	NA	NA	NA	NA	NA	16.7	NA	NA	2	NA	NA	NA	NA	NA	NA	NA	27.5	60	45.83	0.08	0.8	2.92	NA
109596	2836.727855	3131.915981	1	4	4	NA	NA	NA	NA	NA	NA	NA	NA	NA	NA	NA	NA	NA	NA	NA	NA	NA	NA	NA	NA	NA	NA	NA	NA	17.1	NA	NA	2	NA	NA	NA	NA	NA	NA	NA	2.9	70	4.14	0.08	0.56	3.81	NA
109597	19749.78588	20793.20343	2	70	5	15	4.1	95	19	23	19	99	64	1.64	2.5	4.22	19	77	163	275	3.8	4.7	137	0.4	9.7	165	6.6	108	7.9	32	0	2	2	NA	2	2	1	2	2	1	1	43	2.33	NA	NA	NA	1.163
109598	32594.83824	38223.64543	1	25	3	20	4.5	49	15	26	20	96	163	0.87	2.7	5.22	17	102	140	278	3.6	3.9	138	0.2	9.7	186	7.2	162	6.1	25.9	NA	NA	2	NA	NA	NA	2	2	2	2	3.9	128	3.05	0.08	0.56	1.79	1.227
109599	52355.77387	58654.37494	2	5	3	NA	NA	NA	NA	NA	NA	NA	NA	NA	NA	NA	NA	NA	NA	NA	NA	NA	NA	NA	NA	NA	NA	NA	NA	14.7	NA	NA	2	NA	NA	NA	NA	NA	NA	NA	7.3	71	10.28	0.08	0.56	3.56	NA
109600	5926.117182	0	2	66	4	NA	NA	NA	NA	NA	NA	NA	NA	NA	NA	NA	NA	NA	NA	NA	NA	NA	NA	NA	NA	NA	NA	NA	NA	NA	NA	1	2	NA	2	2	2	2	2	2	NA	NA	NA	NA	NA	NA	NA
109601	74296.83809	83619.59253	1	30	3	23	4.5	72	23	25	14	100	183	0.99	3.2	4.77	15	51	138	283	3.9	4.1	142	0.3	9.8	153	7.7	138	5.7	33.5	NA	NA	2	NA	NA	NA	2	1	2	2	7.1	179	3.97	NA	NA	NA	1.308
109602	10702.30983	10969.10215	2	43	2	10	4	66	15	22	13	105	73	0.68	3	5.38	12	61	109	283	3.8	3.7	142	0.2	8.8	192	7	70	4	30.8	NA	2	2	5.72	NA	NA	2	1	2	2	9.6	140	6.86	NA	NA	NA	0.427
109603	15247.44951	0	2	2	2	NA	NA	NA	NA	NA	NA	NA	NA	NA	NA	NA	NA	NA	NA	NA	NA	NA	NA	NA	NA	NA	NA	NA	NA	NA	NA	NA	2	NA	NA	NA	NA	NA	NA	NA	NA	NA	NA	NA	NA	NA	NA
109604	22611.40536	23338.68918	1	10	1	NA	NA	NA	NA	NA	NA	NA	NA	NA	NA	NA	NA	NA	NA	NA	NA	NA	NA	NA	NA	NA	NA	NA	NA	24.8	NA	NA	2	NA	NA	NA	NA	NA	NA	NA	15.1	143	10.56	NA	NA	NA	1.246
109605	2503.827644	2588.001359	2	0	3	NA	NA	NA	NA	NA	NA	NA	NA	NA	NA	NA	NA	NA	NA	NA	NA	NA	NA	NA	NA	NA	NA	NA	NA	NA	NA	NA	NA	NA	NA	NA	NA	NA	NA	NA	NA	NA	NA	NA	NA	NA	NA
109606	11166.23367	11591.37149	2	32	4	20	4.1	79	20	24	12	102	165	0.81	3.1	5.05	69	123	154	281	3.9	3.8	141	0.3	9.5	193	7.2	38	4.6	22.2	NA	NA	2	5.5	NA	NA	2	1	2	2	4.6	143	3.22	NA	NA	NA	NA
109607	7022.193287	7670.323183	1	63	1	18	4.2	102	16	25	18	105	84	0.94	2.9	5.27	17	142	167	290	2.8	5.2	145	0.5	9.5	271	7.1	151	6.3	23.2	0	2	2	5.77	2	2	2	2	2	2	14.2	111	12.79	NA	NA	NA	0.8
109608	40475.82511	43166.43326	2	54	3	22	4.5	106	27	21	19	104	62	0.86	2.5	5.22	43	102	123	278	4.3	3.8	138	0.3	9.2	209	7	50	3.4	19.5	0	2	2	5.38	2	2	2	2	2	2	8.8	88	10	NA	NA	NA	0.885
109609	8218.123232	8999.680799	2	6	4	NA	NA	NA	NA	NA	NA	NA	NA	NA	NA	NA	NA	NA	NA	NA	NA	NA	NA	NA	NA	NA	NA	NA	NA	16.7	NA	NA	2	NA	NA	NA	NA	NA	NA	NA	1.6	14	11.43	NA	NA	NA	0.264
109610	4966.800256	5051.196599	1	78	4	13	3.9	62	15	23	13	110	266	0.8	2.3	11.93	18	74	195	295	2.9	4.3	145	0.2	8.4	120	6.2	44	4.4	32.6	1	1	1	12.8	2	2	2	2	2	2	24.5	152	16.12	NA	NA	NA	0.506
109611	8101.507215	8497.515303	1	55	4	33	3.8	60	34	27	19	102	202	1.02	3.6	4.72	29	189	155	279	3.3	4.2	139	0.7	9.1	193	7.4	78	7.2	21.2	1	1	2	5.16	2	2	2	2	2	2	14.6	107	13.64	NA	NA	NA	0.664
109612	4219.124104	4280.287645	1	75	4	10	3.8	76	14	27	11	99	170	1.37	3.5	10.88	26	112	139	280	2.8	4.1	138	0.8	8.5	168	7.3	126	6	29.8	1	1	1	11.4	2	2	2	1	1	1	13.5	230	5.87	NA	NA	NA	0.149
109613	19262.25913	19900.52221	1	16	3	NA	NA	NA	NA	NA	NA	NA	NA	NA	NA	NA	NA	NA	NA	NA	NA	NA	NA	NA	NA	NA	NA	NA	NA	26.5	NA	NA	1	NA	NA	NA	NA	2	NA	NA	23.5	97	24.23	NA	NA	NA	1.485
109614	6294.570297	7299.119678	1	80	3	24	3.8	76	24	30	44	102	114	1.93	3.1	4	58	86	151	302	5	3.9	147	0.4	9.3	187	6.9	183	7.2	29	1	1	1	NA	2	2	1	1	2	2	1137	108	1052.78	NA	NA	NA	0.681
109615	7743.434621	8203.069772	2	65	4	19	4.2	67	25	26	12	101	203	0.98	3.3	5.38	10	121	205	281	3.4	3.6	141	0.6	9.9	172	7.5	64	5.1	28	0	2	2	5.66	2	2	2	1	2	2	13.2	345	3.83	NA	NA	NA	0.32
109616	10909.25912	11801.01431	1	8	4	NA	NA	NA	NA	NA	NA	NA	NA	NA	NA	NA	NA	NA	NA	NA	NA	NA	NA	NA	NA	NA	NA	NA	NA	14.9	NA	NA	2	NA	NA	NA	NA	NA	NA	NA	10.1	210	4.81	NA	NA	NA	NA
109617	9226.958794	9885.25786	1	64	1	19	3.8	111	18	25	9	97	143	0.87	3.3	5.16	34	33	155	276	2.8	4	139	0.8	9.5	278	7.1	109	4.8	25.6	0	2	2	5.83	2	2	2	1	2	2	8.8	100	8.8	0.08	0.56	2.44	1.141
109618	4744.828907	5865.731376	2	4	5	NA	NA	NA	NA	NA	NA	NA	NA	NA	NA	NA	NA	NA	NA	NA	NA	NA	NA	NA	NA	NA	NA	NA	NA	13.8	NA	NA	2	NA	NA	NA	NA	NA	NA	NA	57.3	72	79.58	0.43	0.56	8.61	NA
109619	2384.02065	2613.641895	1	0	3	NA	NA	NA	NA	NA	NA	NA	NA	NA	NA	NA	NA	NA	NA	NA	NA	NA	NA	NA	NA	NA	NA	NA	NA	NA	NA	NA	NA	NA	NA	NA	NA	NA	NA	NA	NA	NA	NA	NA	NA	NA	NA
109620	17116.41848	18138.48109	2	59	2	36	3.9	225	53	23	8	100	116	0.57	4.1	8.16	321	101	185	275	3.8	3.9	137	1.2	9.2	225	8	142	4.9	33.1	0	2	1	8.6	2	2	2	1	2	2	6.5	67	9.7	0.08	0.56	5.05	0.387
109621	18096.82355	0	1	11	3	NA	NA	NA	NA	NA	NA	NA	NA	NA	NA	NA	NA	NA	NA	NA	NA	NA	NA	NA	NA	NA	NA	NA	NA	NA	NA	NA	2	NA	NA	NA	NA	NA	NA	NA	NA	NA	NA	NA	NA	NA	NA
109622	8086.687854	0	1	10	3	NA	NA	NA	NA	NA	NA	NA	NA	NA	NA	NA	NA	NA	NA	NA	NA	NA	NA	NA	NA	NA	NA	NA	NA	NA	NA	NA	2	NA	NA	NA	NA	NA	NA	NA	NA	NA	NA	NA	NA	NA	NA
109623	9865.767406	10427.20398	2	31	5	11	4.3	83	19	25	13	100	105	0.68	2.9	4.5	9	132	59	277	4.5	3.5	139	0.5	9	182	7.2	82	5.1	18.8	NA	NA	2	NA	NA	NA	2	2	2	2	11.8	176	6.7	1.08	0.56	126.9	0.473
109624	12459.43536	14125.90636	2	8	3	NA	NA	NA	NA	NA	NA	NA	NA	NA	NA	NA	NA	NA	NA	NA	NA	NA	NA	NA	NA	NA	NA	NA	NA	18.4	NA	NA	2	NA	NA	NA	NA	NA	NA	NA	7.3	23	31.74	0.08	0.56	1.49	NA
109625	8336.176265	10276.3145	1	10	5	NA	NA	NA	NA	NA	NA	NA	NA	NA	NA	NA	NA	NA	NA	NA	NA	NA	NA	NA	NA	NA	NA	NA	NA	20.8	NA	NA	2	NA	NA	NA	NA	NA	NA	NA	17.2	90	19.11	NA	NA	NA	0.721
109626	7778.959836	8047.428172	1	61	2	24	4	48	17	25	11	97	217	0.77	2.6	6.77	21	85	121	275	2.9	4	137	0.1	9.1	191	6.6	247	3.7	31.9	1	1	1	NA	2	2	2	1	2	2	3.8	60	6.33	NA	NA	NA	1.194
109627	16035.54395	0	2	8	4	NA	NA	NA	NA	NA	NA	NA	NA	NA	NA	NA	NA	NA	NA	NA	NA	NA	NA	NA	NA	NA	NA	NA	NA	NA	NA	NA	2	NA	NA	NA	NA	NA	NA	NA	NA	NA	NA	NA	NA	NA	NA
109628	11305.42985	12026.45437	2	39	2	20	3.8	71	18	27	13	102	138	0.65	3.3	4.72	33	63	169	284	3.9	4	143	0.3	9.2	269	7.1	197	6.4	43	NA	NA	2	NA	NA	NA	2	1	2	2	951	193	492.75	0.08	0.56	7.62	0.233
109629	8855.93998	9557.272239	1	40	4	15	4.3	55	20	28	10	105	109	0.85	3.3	4.39	23	80	129	292	4.8	4.2	148	0.1	9.6	178	7.6	84	5.7	19.6	NA	2	2	4.94	NA	NA	2	2	2	2	31.9	137	23.28	NA	NA	NA	0.149
109630	241097.4947	243396.7631	2	56	3	24	4.3	64	20	27	11	101	129	0.61	3.2	6.05	14	97	134	283	3.6	4	142	0.4	9.6	213	7.5	148	5.2	35.7	0	1	2	6.16	2	2	2	1	2	2	11.2	116	9.66	0.08	0.56	12.75	0.343
109631	39640.84018	0	1	79	3	NA	NA	NA	NA	NA	NA	NA	NA	NA	NA	NA	NA	NA	NA	NA	NA	NA	NA	NA	NA	NA	NA	NA	NA	NA	NA	2	2	NA	2	1	2	2	2	2	NA	NA	NA	NA	NA	NA	NA
109632	20342.68785	22092.89093	1	17	3	26	4.4	119	24	23	12	100	504	1.15	2.6	4.83	13	138	154	275	3.8	4.3	138	2.4	9.3	148	7	61	5.5	21.3	NA	NA	2	5.27	NA	NA	NA	2	NA	NA	8.3	305	2.72	NA	NA	NA	NA
109633	6721.447505	7624.958082	2	4	2	NA	NA	NA	NA	NA	NA	NA	NA	NA	NA	NA	NA	NA	NA	NA	NA	NA	NA	NA	NA	NA	NA	NA	NA	15.6	NA	NA	2	NA	NA	NA	NA	NA	NA	NA	4.7	28	16.79	0.08	0.56	2.5	NA
109634	11721.93999	12236.16419	2	62	1	15	4.1	101	20	23	16	104	92	0.6	3	5	11	110	134	280	3.4	4.1	140	0.2	10.8	184	7.1	117	3.6	23.3	0	2	2	NA	2	2	2	2	2	2	1.8	21	8.57	NA	NA	NA	NA
109635	17534.85529	17718.45894	2	40	1	16	4.1	54	18	28	15	99	108	0.7	3.4	5	13	129	147	278	3.3	4.1	139	0.4	9	165	7.5	93	4.4	33.6	NA	2	2	5.66	NA	NA	2	1	2	2	6.3	110	5.73	NA	NA	NA	0.787
109636	17720.28024	19014.34936	2	4	3	NA	NA	NA	NA	NA	NA	NA	NA	NA	NA	NA	NA	NA	NA	NA	NA	NA	NA	NA	NA	NA	NA	NA	NA	15.5	NA	NA	2	NA	NA	NA	NA	NA	NA	NA	24.2	129	18.76	0.95	0.56	10.89	NA
109637	26217.3058	29708.58925	2	46	4	13	3.8	75	19	26	13	101	191	0.88	3.5	5.22	13	63	164	277	4.1	3.6	139	1	9.3	229	7.3	88	4.5	29.7	NA	2	2	5.33	NA	NA	2	2	2	2	4.6	139	3.31	0.08	0.56	45.63	0.811
109638	100202.203	116101.6328	2	48	3	7	3.6	76	14	28	4	102	74	0.58	2.8	6.61	10	60	179	283	3.5	3.6	143	0.4	8.6	137	6.4	139	3.9	43.6	NA	1	1	7.16	NA	NA	2	1	2	2	6.2	55	11.27	NA	NA	NA	1.536
109639	24934.67923	26943.80474	2	42	3	8	3.8	76	18	25	13	104	79	0.67	2.9	5.05	15	101	160	285	3.1	4.4	143	0.3	8.9	259	6.7	164	5.4	28.3	NA	2	2	5.66	NA	NA	2	2	2	2	4.4	124	3.55	NA	NA	NA	0.796
109640	14466.30409	15825.01629	2	50	5	17	4.4	83	17	24	11	106	51	0.57	3.4	6.05	63	67	150	289	3.5	4.1	145	0.2	9.6	186	7.8	97	6	30.6	NA	2	2	NA	2	2	2	2	2	2	55.6	113	49.2	NA	NA	NA	0.309
109641	5248.39265	6067.804617	1	14	5	9	4.1	334	16	24	13	102	87	0.79	2.7	8.05	15	88	156	282	4.2	4.1	140	0.5	9.4	147	6.8	93	9.6	27.1	NA	NA	2	NA	NA	NA	NA	NA	NA	NA	6	177	3.39	NA	NA	NA	NA
109642	1664.0254	1900.736211	1	8	4	NA	NA	NA	NA	NA	NA	NA	NA	NA	NA	NA	NA	NA	NA	NA	NA	NA	NA	NA	NA	NA	NA	NA	NA	21.8	NA	NA	2	NA	NA	NA	NA	NA	NA	NA	5.2	103	5.05	NA	NA	NA	0.169
109643	29216.72768	43103.19961	2	80	3	19	3.5	66	22	28	25	103	99	1.06	2.5	5.11	14	41	253	289	4.1	4.4	143	0.5	9	195	6	135	7	34.5	0	1	1	NA	2	1	2	2	1	2	26	175	14.86	0.08	0.83	61.68	0.308
109644	20603.73374	22560.70826	1	24	2	45	4.5	104	34	25	13	100	387	1.14	3	6.11	41	94	255	278	4.4	3.9	139	0.4	9.6	201	7.5	339	7.6	25	NA	NA	2	NA	NA	NA	2	2	2	2	1.8	44	4.09	NA	NA	NA	NA
109645	13838.3691	15422.48836	2	62	2	12	3.7	139	16	25	16	105	58	0.74	3.3	4.72	21	47	166	285	3.5	4.4	143	0.2	8.9	169	7	92	5.2	29.9	0	1	2	5.05	1	2	2	1	2	2	5.9	81	7.28	NA	NA	NA	0.48
109646	4672.257188	5198.68182	1	8	4	NA	NA	NA	NA	NA	NA	NA	NA	NA	NA	NA	NA	NA	NA	NA	NA	NA	NA	NA	NA	NA	NA	NA	NA	14.9	NA	NA	2	NA	NA	NA	NA	NA	NA	NA	10.6	179	5.92	NA	NA	NA	NA
109647	12239.0216	14015.98474	2	0	5	NA	NA	NA	NA	NA	NA	NA	NA	NA	NA	NA	NA	NA	NA	NA	NA	NA	NA	NA	NA	NA	NA	NA	NA	NA	NA	NA	NA	NA	NA	NA	NA	NA	NA	NA	NA	NA	NA	NA	NA	NA	NA
109648	2141.213716	2142.455649	2	1	4	NA	NA	NA	NA	NA	NA	NA	NA	NA	NA	NA	NA	NA	NA	NA	NA	NA	NA	NA	NA	NA	NA	NA	NA	NA	NA	NA	2	NA	NA	NA	NA	NA	NA	NA	NA	NA	NA	NA	NA	NA	NA
109649	7788.988678	9993.622667	1	80	3	9	3.9	85	15	22	14	106	121	1.47	3.4	5.27	15	407	158	287	2.4	3.8	144	0.4	8.7	127	7.3	97	7.3	31.6	1	2	2	5.44	2	2	2	2	2	1	333	74	450	NA	NA	NA	1.4
109650	42107.65032	0	1	23	1	NA	NA	NA	NA	NA	NA	NA	NA	NA	NA	NA	NA	NA	NA	NA	NA	NA	NA	NA	NA	NA	NA	NA	NA	NA	NA	NA	2	NA	NA	NA	2	2	2	2	NA	NA	NA	NA	NA	NA	NA
109651	2561.390487	2828.076882	2	0	3	NA	NA	NA	NA	NA	NA	NA	NA	NA	NA	NA	NA	NA	NA	NA	NA	NA	NA	NA	NA	NA	NA	NA	NA	NA	NA	NA	NA	NA	NA	NA	NA	NA	NA	NA	NA	NA	NA	NA	NA	NA	NA
109652	20837.58428	22270.98392	2	76	3	12	4.2	94	18	25	23	102	107	0.76	3.1	5.33	14	69	136	285	4.2	4	141	0.2	9.6	212	7.3	145	5.7	NA	0	2	2	NA	2	2	2	2	2	2	15.7	71	22.11	NA	NA	NA	1.524
109653	21550.94018	23767.01535	2	80	3	31	3.9	73	45	23	35	98	352	1.29	3.5	5.88	25	34	247	288	3.3	4.2	140	0.2	9.5	158	7.4	83	9	34.2	NA	2	1	6.27	1	2	1	1	1	2	108	75	144	NA	NA	NA	0.126
109654	10028.59268	10547.49482	1	18	5	21	4.1	86	17	25	19	101	212	0.84	3.1	5.22	16	56	152	281	3.8	4.2	140	0.8	9.6	178	7.2	54	4.1	26.6	NA	NA	2	4.61	NA	NA	NA	1	NA	NA	6.3	169	3.73	NA	NA	NA	0.427
109655	14354.77052	14700.04456	2	42	1	NA	NA	NA	NA	NA	NA	NA	NA	NA	NA	NA	NA	NA	NA	NA	NA	NA	NA	NA	NA	NA	NA	NA	NA	38.5	NA	2	2	NA	NA	NA	2	2	2	2	6.8	102	6.67	0.37	0.56	20.45	0.665
109656	4575.738564	4857.666209	2	60	1	37	4.2	67	28	24	15	104	123	0.67	2.5	5.27	14	88	157	287	3.7	4.2	144	0.3	9.2	192	6.7	105	4.4	40.8	0	2	1	NA	2	2	2	1	2	2	68.1	112	60.8	0.08	0.56	27.26	0.92
109657	56375.29842	55876.6618	2	33	3	13	4.2	69	17	24	12	99	34	0.43	2.7	4.83	8	29	148	273	2.9	3.9	137	0.1	9.2	180	6.9	129	5.3	26.2	NA	NA	2	NA	NA	NA	2	2	1	2	298	28	1064.29	NA	NA	NA	2.121
109658	8696.440448	9397.389311	1	10	1	NA	NA	NA	NA	NA	NA	NA	NA	NA	NA	NA	NA	NA	NA	NA	NA	NA	NA	NA	NA	NA	NA	NA	NA	18.9	NA	NA	2	NA	NA	NA	NA	NA	NA	NA	11.6	54	21.48	NA	NA	NA	1.322
109659	14238.32792	15994.15725	2	4	1	NA	NA	NA	NA	NA	NA	NA	NA	NA	NA	NA	NA	NA	NA	NA	NA	NA	NA	NA	NA	NA	NA	NA	NA	15	NA	NA	2	NA	NA	NA	NA	NA	NA	NA	7.3	48	15.21	0.08	0.56	2.9	NA
109660	5821.625386	7160.385261	2	2	5	NA	NA	NA	NA	NA	NA	NA	NA	NA	NA	NA	NA	NA	NA	NA	NA	NA	NA	NA	NA	NA	NA	NA	NA	14.5	NA	NA	2	NA	NA	NA	NA	NA	NA	NA	NA	NA	NA	NA	NA	NA	NA
109661	39700.2403	46057.63231	1	23	3	NA	NA	NA	NA	NA	NA	NA	NA	NA	NA	NA	NA	NA	NA	NA	NA	NA	NA	NA	NA	NA	NA	NA	NA	26.8	NA	NA	2	NA	NA	NA	2	2	2	2	6.7	157	4.27	0.08	0.56	5.73	0.613
109662	22875.52973	24702.79838	1	32	2	29	3.7	105	18	26	23	103	328	1.37	2.7	5.61	51	76	195	289	3.4	3.9	143	0.2	9.3	222	6.4	190	7.7	25.5	NA	NA	2	NA	NA	NA	2	2	2	2	4.4	103	4.27	NA	NA	NA	0.882
109663	8983.843281	0	2	10	3	NA	NA	NA	NA	NA	NA	NA	NA	NA	NA	NA	NA	NA	NA	NA	NA	NA	NA	NA	NA	NA	NA	NA	NA	NA	NA	NA	2	NA	NA	NA	NA	NA	NA	NA	NA	NA	NA	NA	NA	NA	NA
109664	11843.42668	12813.75061	1	22	4	21	4.1	44	22	25	11	99	374	0.9	3.1	4.88	26	79	128	276	4.2	4.1	139	0.3	9.3	195	7.2	53	5.1	28.4	NA	NA	2	NA	NA	NA	2	2	2	2	11.1	286	3.88	NA	NA	NA	NA
109665	87509.7376	106470.7401	2	42	3	21	4.1	76	14	25	13	106	125	0.77	2.6	4.33	20	71	134	284	3.4	3.9	143	0.7	9.4	200	6.7	135	4.4	37	NA	2	2	NA	NA	NA	2	2	1	2	39.8	254	15.67	NA	NA	NA	0.551
109666	9516.224411	10591.37066	2	70	4	8	3.4	176	14	22	28	105	95	1.45	3.4	5.77	11	73	174	291	4.5	4.6	143	0.2	8.8	171	6.8	76	7.1	49.8	NA	2	1	NA	2	2	2	1	2	2	34.1	121	28.18	0.08	0.56	33.81	0.629
109667	5393.904869	5671.225062	1	64	1	13	4.2	85	19	26	14	103	111	0.98	2.7	5.27	22	128	190	283	2.7	4	142	0.7	8.7	195	6.9	79	5.6	27.6	0	2	2	5.83	2	2	2	2	1	2	18.2	220	8.27	NA	NA	NA	0.32
109668	7665.212765	0	2	14	3	NA	NA	NA	NA	NA	NA	NA	NA	NA	NA	NA	NA	NA	NA	NA	NA	NA	NA	NA	NA	NA	NA	NA	NA	NA	NA	NA	2	NA	NA	NA	NA	NA	NA	NA	NA	NA	NA	NA	NA	NA	NA
109669	19996.28122	21327.30868	1	59	4	14	3.7	82	19	33	15	98	109	0.67	3.8	8.88	18	82	183	280	3.5	3.7	138	0.5	8.9	179	7.5	74	5.6	22.1	NA	2	2	NA	2	2	2	2	2	2	13.7	62	22.1	NA	NA	NA	NA
109670	7299.700362	7464.695366	2	0	2	NA	NA	NA	NA	NA	NA	NA	NA	NA	NA	NA	NA	NA	NA	NA	NA	NA	NA	NA	NA	NA	NA	NA	NA	NA	NA	NA	NA	NA	NA	NA	NA	NA	NA	NA	NA	NA	NA	NA	NA	NA	NA
109671	38076.25356	43026.25513	1	5	3	NA	NA	NA	NA	NA	NA	NA	NA	NA	NA	NA	NA	NA	NA	NA	NA	NA	NA	NA	NA	NA	NA	NA	NA	13.3	NA	NA	2	NA	NA	NA	NA	NA	NA	NA	7.5	60	12.5	0.08	0.56	0.8	NA
109672	35197.57066	42468.59089	1	2	3	NA	NA	NA	NA	NA	NA	NA	NA	NA	NA	NA	NA	NA	NA	NA	NA	NA	NA	NA	NA	NA	NA	NA	NA	15.7	NA	NA	2	NA	NA	NA	NA	NA	NA	NA	NA	NA	NA	NA	NA	NA	NA
109673	19188.44415	20958.7827	1	34	1	14	4.5	89	19	27	19	99	176	1.13	3.5	4.44	13	76	147	281	4.3	4.1	140	0.2	9.5	214	8	153	7.2	28.6	NA	NA	2	NA	NA	NA	2	1	2	2	2.6	78	3.33	NA	NA	NA	2.048
109674	4365.328958	4477.98386	2	4	5	NA	NA	NA	NA	NA	NA	NA	NA	NA	NA	NA	NA	NA	NA	NA	NA	NA	NA	NA	NA	NA	NA	NA	NA	15.8	NA	NA	2	NA	NA	NA	NA	NA	NA	NA	9.7	56	17.32	0.79	0.99	3.15	NA
109675	13742.98888	15033.76547	2	51	5	17	3.9	75	22	28	11	103	73	0.53	3.4	4.88	13	83	149	282	3.7	3.9	142	0.4	9.3	228	7.3	117	3.8	25.7	0	2	2	5.16	2	2	2	2	2	2	3.3	46	7.17	0.08	0.56	6.03	0.391
109676	11606.14722	11652.15769	2	64	3	22	3.9	88	25	30	22	103	239	0.76	3	4.88	13	75	221	284	4.1	4.4	141	0.6	8.9	172	6.9	67	4.3	24.6	0	2	2	NA	2	2	2	2	2	2	16.1	114	14.12	0.08	0.56	14.59	NA
109677	17403.34953	18746.69844	2	76	2	11	3.7	105	19	21	36	106	86	1.78	3.2	7.99	20	110	162	290	3.8	5	140	0.3	9.4	175	6.9	174	6.2	36.6	0	1	1	8.27	2	2	2	1	2	2	89.5	177	50.56	NA	NA	NA	0.257
109678	44915.24416	45697.43562	2	32	3	9	4.3	83	15	24	12	101	95	0.99	2.8	4.27	13	67	138	276	2.9	3.8	139	0.5	9.2	200	7.1	62	4.6	19	NA	NA	2	NA	NA	NA	2	2	2	2	36.3	255	14.24	NA	NA	NA	0.256
109679	11895.39784	13681.80012	1	28	5	39	4.5	50	132	27	11	105	11	0.89	2.8	4.77	13	105	365	287	3.1	4	145	0.4	9.4	157	7.3	78	5.6	26.6	NA	NA	2	5.16	NA	NA	2	2	2	2	1.3	17	7.65	NA	NA	NA	2.031
109680	4711.020986	5201.522223	2	0	3	NA	NA	NA	NA	NA	NA	NA	NA	NA	NA	NA	NA	NA	NA	NA	NA	NA	NA	NA	NA	NA	NA	NA	NA	NA	NA	NA	NA	NA	NA	NA	NA	NA	NA	NA	NA	NA	NA	NA	NA	NA	NA
109681	11864.99978	12481.43772	2	10	4	NA	NA	NA	NA	NA	NA	NA	NA	NA	NA	NA	NA	NA	NA	NA	NA	NA	NA	NA	NA	NA	NA	NA	NA	23.8	NA	NA	2	NA	NA	NA	NA	NA	NA	NA	17.4	190	9.16	NA	NA	NA	0.291
109682	20295.56835	22219.92384	1	17	5	10	4.5	137	19	28	12	101	381	0.91	3	4.5	12	77	136	278	3.8	4.6	140	0.2	9.8	121	7.5	59	5.5	20.2	NA	NA	2	NA	NA	NA	NA	2	NA	NA	14.5	243	5.97	NA	NA	NA	0.613
109683	45735.00715	48533.63835	2	29	3	NA	NA	NA	NA	NA	NA	NA	NA	NA	NA	NA	NA	NA	NA	NA	NA	NA	NA	NA	NA	NA	NA	NA	NA	21.9	NA	NA	2	NA	NA	NA	2	2	2	2	32	189	16.93	0.59	0.56	7	0.409
109684	9298.292262	9800.656329	1	9	1	NA	NA	NA	NA	NA	NA	NA	NA	NA	NA	NA	NA	NA	NA	NA	NA	NA	NA	NA	NA	NA	NA	NA	NA	18.6	NA	NA	2	NA	NA	NA	NA	NA	NA	NA	48.4	82	59.02	0.08	0.56	6.03	0.049
109685	15768.64629	16211.61	1	38	5	22	4.3	115	21	24	13	104	281	0.85	2.7	5.94	13	116	148	280	3.5	4.1	140	0.8	9	150	7	85	3.9	23	NA	NA	2	6.33	NA	NA	2	2	2	2	4.3	138	3.12	NA	NA	NA	0.693
109686	10392.50602	11319.46109	1	60	5	31	4.3	75	30	22	12	103	209	0.81	3.1	5.22	24	89	157	277	2.4	4	139	0.3	9.6	185	7.4	178	6.3	28.9	0	2	2	NA	2	2	2	2	2	2	27.5	77	35.71	0.08	0.56	20.71	1.098
109687	5545.332627	5731.921252	2	37	3	11	4.3	69	15	24	8	103	102	0.93	2.7	4.77	10	105	140	284	3.6	3.8	144	0.8	9	211	7	78	5.8	21.3	NA	NA	2	5.05	NA	NA	2	2	2	2	3.2	60	5.33	NA	NA	NA	NA
109688	21010.17362	24724.09739	2	4	3	NA	NA	NA	NA	NA	NA	NA	NA	NA	NA	NA	NA	NA	NA	NA	NA	NA	NA	NA	NA	NA	NA	NA	NA	14.7	NA	NA	2	NA	NA	NA	NA	NA	NA	NA	3.8	8	47.5	0.08	0.83	0.63	NA
109689	8802.151185	9396.918833	2	14	4	8	4.2	88	15	22	16	107	97	0.78	3.1	5.05	10	56	100	286	3.1	3.7	143	0.4	9.4	125	7.3	41	4.1	21.2	NA	NA	2	5.5	NA	NA	NA	NA	NA	NA	39.4	282	13.97	NA	NA	NA	NA
109690	10890.12861	12909.91967	1	3	5	NA	NA	NA	NA	NA	NA	NA	NA	NA	NA	NA	NA	NA	NA	NA	NA	NA	NA	NA	NA	NA	NA	NA	NA	13.4	NA	NA	2	NA	NA	NA	NA	NA	NA	NA	NA	NA	NA	NA	NA	NA	NA
109691	10800.15594	11504.78849	2	26	5	9	3.6	66	14	22	10	103	125	0.69	3.2	4.39	15	78	114	276	2.6	4.1	139	0.4	9	128	6.8	77	5.7	30.6	NA	NA	2	4.72	NA	NA	2	2	2	2	8.1	102	7.94	NA	NA	NA	NA
109692	12520.7379	14300.46973	2	16	5	27	4.4	93	26	20	15	105	61	0.45	3.1	4.61	12	36	148	279	3	4.2	140	0.4	9.8	148	7.5	109	3.1	16.3	NA	NA	2	4.88	NA	NA	NA	2	NA	NA	86.3	243	35.51	NA	NA	NA	0.173
109693	22272.33651	23693.12409	2	25	1	14	4.5	67	15	26	14	97	131	0.62	3.3	4.72	19	54	144	274	5.2	4	137	0.2	10.7	220	7.8	384	5.9	30.5	NA	NA	2	NA	NA	NA	2	2	2	2	12.4	141	8.79	NA	NA	NA	0.671
109694	19869.86347	0	1	9	3	NA	NA	NA	NA	NA	NA	NA	NA	NA	NA	NA	NA	NA	NA	NA	NA	NA	NA	NA	NA	NA	NA	NA	NA	NA	NA	NA	2	NA	NA	NA	NA	NA	NA	NA	NA	NA	NA	NA	NA	NA	NA
109695	8144.065096	9179.571121	1	3	5	NA	NA	NA	NA	NA	NA	NA	NA	NA	NA	NA	NA	NA	NA	NA	NA	NA	NA	NA	NA	NA	NA	NA	NA	15.1	NA	NA	2	NA	NA	NA	NA	NA	NA	NA	4.6	54	8.52	0.08	0.56	98.46	NA
109696	43535.91731	45835.99997	2	79	3	15	3.9	48	20	24	27	104	45	0.83	2.7	5.11	12	92	157	290	3.5	4.1	143	0.4	9.4	110	6.6	113	6.5	33.5	NA	2	1	5.44	2	2	1	1	2	2	NA	NA	NA	NA	NA	NA	NA
109697	11036.0002	11362.92469	2	35	1	18	4.3	89	15	25	11	98	66	0.57	3.3	5.5	26	106	120	273	3.8	4	137	0.7	9.4	198	7.6	123	5	26.9	NA	NA	2	6	NA	NA	2	2	2	2	12.5	119	10.5	NA	NA	NA	NA
109698	18203.7922	19354.54319	2	16	3	11	4.5	107	14	25	12	102	124	0.82	2.7	5.22	10	80	143	279	4.6	4.4	140	1.7	9.5	178	7.2	60	4.1	17.9	NA	NA	2	5.77	NA	NA	NA	2	NA	NA	11.1	235	4.72	1.4	0.56	23.12	0.26
109699	5445.408967	5919.40059	2	3	4	NA	NA	NA	NA	NA	NA	NA	NA	NA	NA	NA	NA	NA	NA	NA	NA	NA	NA	NA	NA	NA	NA	NA	NA	16.6	NA	NA	2	NA	NA	NA	NA	NA	NA	NA	9.8	81	12.1	0.08	0.56	2.82	NA
109700	22503.3613	21505.17839	2	42	2	21	3.7	82	17	26	14	98	82	0.62	2.7	4.22	67	34	117	271	4.4	3.4	136	0.2	8.4	159	6.4	184	3.5	29.2	NA	2	2	NA	NA	NA	2	1	2	2	5.3	26	20.38	NA	NA	NA	4.786
109701	21694.32679	0	2	13	1	NA	NA	NA	NA	NA	NA	NA	NA	NA	NA	NA	NA	NA	NA	NA	NA	NA	NA	NA	NA	NA	NA	NA	NA	NA	NA	NA	2	NA	NA	NA	NA	NA	NA	NA	NA	NA	NA	NA	NA	NA	NA
109702	11188.26004	11954.97888	2	15	4	8	4	134	13	23	8	101	91	0.51	3.1	4.27	8	135	128	271	3.9	3.9	137	1.3	9.5	119	7.1	67	5.1	23.9	NA	NA	2	NA	NA	NA	NA	NA	NA	NA	160	122	131.15	0.14	0.56	29.25	0.343
109703	13651.23404	14513.12173	1	34	4	30	4.4	69	52	30	12	95	2499	1.3	2.8	4.61	17	146	137	269	3.3	4.2	135	0.8	9.6	193	7.2	42	4.4	27	NA	NA	2	NA	NA	NA	2	2	2	2	2.2	80	2.75	NA	NA	NA	0.938
109704	9539.341156	10529.93001	1	31	5	28	4.6	33	17	23	12	102	61	0.65	3.4	5.55	33	58	124	281	3.9	4.3	141	0.4	9.6	140	8	166	5.9	25.6	NA	NA	2	6.22	NA	NA	2	2	2	2	9.9	77	12.86	NA	NA	NA	1.107
109705	25203.09197	27235.58711	1	38	4	22	3.7	89	15	29	9	97	82	0.77	3.6	8.88	64	37	189	289	3.6	3.8	144	0.4	9.2	170	7.3	88	9.7	NA	NA	NA	2	NA	NA	NA	2	1	2	2	NA	NA	NA	NA	NA	NA	NA
109706	15583.25005	16099.60762	1	12	3	11	4.4	232	21	25	7	101	188	0.5	2.4	5.27	9	98	212	273	5	4	138	0.5	9.4	141	6.8	107	3.4	18.2	NA	NA	2	NA	NA	NA	NA	NA	NA	NA	1.7	47	3.62	NA	NA	NA	1.512
109707	4561.950366	5264.52126	2	15	5	11	3.7	62	17	24	19	105	109	0.62	3.6	4.72	13	70	131	281	4	3.9	140	0.4	9.2	180	7.3	111	4.2	24.8	NA	NA	2	NA	NA	NA	NA	NA	NA	NA	9.4	179	5.25	NA	NA	NA	0.519
109708	3478.792874	3553.807411	1	1	4	NA	NA	NA	NA	NA	NA	NA	NA	NA	NA	NA	NA	NA	NA	NA	NA	NA	NA	NA	NA	NA	NA	NA	NA	NA	NA	NA	2	NA	NA	NA	NA	NA	NA	NA	NA	NA	NA	NA	NA	NA	NA
109709	12903.06481	12929.59352	1	52	1	19	4.1	77	15	22	17	102	162	1.01	2.8	5.22	63	78	136	283	3.7	4.2	141	0.3	9.1	142	6.9	213	5.7	42.1	0	1	2	NA	2	2	2	1	2	2	2.2	98	2.24	NA	NA	NA	0.363
109710	10619.42502	11551.83573	1	12	3	12	4.2	296	21	22	15	103	202	0.57	2.4	5	11	76	222	287	5.9	4.6	144	0.4	9.4	131	6.6	76	5.8	22.6	NA	NA	2	NA	NA	NA	NA	NA	NA	NA	8	67	11.94	NA	NA	NA	1.184
109711	16079.91204	17606.16867	1	25	1	NA	NA	NA	NA	NA	NA	NA	NA	NA	NA	NA	NA	NA	NA	NA	NA	NA	NA	NA	NA	NA	NA	NA	NA	31.7	NA	NA	2	NA	NA	NA	2	1	2	2	NA	NA	NA	NA	NA	NA	NA
109712	9162.042557	10053.08634	1	46	4	15	4.1	89	19	26	12	104	440	0.89	2.9	4.88	28	90	134	284	4.1	4.4	143	0.2	9.8	219	7	245	6	32.6	NA	1	2	NA	NA	NA	2	1	2	2	NA	NA	NA	NA	NA	NA	NA
109713	4559.336047	4452.282641	2	50	5	20	4.1	111	16	27	9	97	91	0.77	3.4	5.66	13	85	243	273	3.3	3.6	137	0.6	9.1	199	7.5	330	4.6	30.7	0	2	2	6.05	2	2	2	2	2	2	2.3	17	13.53	NA	NA	NA	1.051
109714	16966.19057	19161.32924	1	30	5	10	4.6	48	16	25	12	100	119	0.77	3.4	4.77	23	53	86	278	4.2	4.1	140	0.2	9.5	177	8	109	5.8	29.8	NA	NA	2	NA	NA	NA	2	1	2	2	4.8	79	6.08	NA	NA	NA	2.072
109715	7467.21248	8104.221125	1	9	4	NA	NA	NA	NA	NA	NA	NA	NA	NA	NA	NA	NA	NA	NA	NA	NA	NA	NA	NA	NA	NA	NA	NA	NA	14.5	NA	NA	2	NA	NA	NA	NA	NA	NA	NA	12.7	137	9.27	NA	NA	NA	0.102
109716	7271.446711	7998.808582	2	25	4	23	4.3	93	21	26	7	104	180	0.67	3.2	4.27	23	50	166	278	4.8	4.2	141	0.3	9.5	144	7.5	76	5.3	33.1	NA	NA	2	NA	NA	NA	2	2	2	2	14.6	191	7.64	NA	NA	NA	1.316
109717	2291.106851	2374.684626	1	7	4	NA	NA	NA	NA	NA	NA	NA	NA	NA	NA	NA	NA	NA	NA	NA	NA	NA	NA	NA	NA	NA	NA	NA	NA	19.4	NA	NA	2	NA	NA	NA	NA	NA	NA	NA	5.4	58	9.31	NA	NA	NA	0.677
109718	11311.25895	13375.08925	2	7	3	NA	NA	NA	NA	NA	NA	NA	NA	NA	NA	NA	NA	NA	NA	NA	NA	NA	NA	NA	NA	NA	NA	NA	NA	19.3	NA	NA	2	NA	NA	NA	NA	NA	NA	NA	7.3	20	36.5	NA	NA	NA	2.103
109719	20862.72445	23548.56476	2	3	3	NA	NA	NA	NA	NA	NA	NA	NA	NA	NA	NA	NA	NA	NA	NA	NA	NA	NA	NA	NA	NA	NA	NA	NA	16.2	NA	NA	2	NA	NA	NA	NA	NA	NA	NA	18.3	63	29.05	0.63	0.94	4.71	NA
109720	21163.21106	25068.0188	2	4	1	NA	NA	NA	NA	NA	NA	NA	NA	NA	NA	NA	NA	NA	NA	NA	NA	NA	NA	NA	NA	NA	NA	NA	NA	15.2	NA	NA	2	NA	NA	NA	NA	NA	NA	NA	307.5	125	246	0.85	0.56	14.57	NA
109721	8099.572343	8938.797024	1	50	2	40	3.8	152	20	22	13	99	101	0.76	3.1	19.65	35	62	127	281	4	4.6	133	0.2	9.3	204	6.9	270	2.2	34.9	1	2	1	20.3	2	2	2	2	1	2	16.6	52	31.92	0.08	0.56	3.5	2.315
109722	4559.052741	0	2	7	4	NA	NA	NA	NA	NA	NA	NA	NA	NA	NA	NA	NA	NA	NA	NA	NA	NA	NA	NA	NA	NA	NA	NA	NA	NA	NA	NA	2	NA	NA	NA	NA	NA	NA	NA	NA	NA	NA	NA	NA	NA	NA
109723	20133.45034	21975.27238	1	29	4	24	4	63	20	26	13	107	277	1.3	3.3	4.05	15	98	179	286	3.4	3.9	144	1	9.1	148	7.3	147	5	26.8	NA	NA	2	NA	NA	NA	2	1	2	2	3.4	159	2.14	NA	NA	NA	NA
109724	10608.84896	11985.93449	2	4	3	NA	NA	NA	NA	NA	NA	NA	NA	NA	NA	NA	NA	NA	NA	NA	NA	NA	NA	NA	NA	NA	NA	NA	NA	15	NA	NA	2	NA	NA	NA	NA	NA	NA	NA	4.2	72	5.83	0.58	0.56	6.09	NA
109725	6934.920473	7640.045399	2	62	1	15	4	110	18	24	15	101	115	0.51	2.8	6.94	14	124	141	287	4.1	4.3	143	0.5	9	168	6.8	129	4	27.8	0	2	1	7.16	2	2	2	2	2	2	2.3	19	12.11	0.08	0.56	7.21	0.099
109726	15478.33835	16968.5527	1	20	4	NA	NA	NA	NA	NA	NA	NA	NA	NA	NA	NA	NA	NA	NA	NA	NA	NA	NA	NA	NA	NA	NA	NA	NA	26.2	NA	NA	2	NA	NA	NA	2	2	2	2	20.6	354	5.82	NA	NA	NA	0.503
109727	16880.18883	17328.70157	2	42	3	12	3.8	58	17	25	8	102	96	0.59	2.7	4.5	15	50	168	275	3	3.9	139	0.3	9.3	172	6.5	45	2.4	31	NA	2	2	NA	NA	NA	2	1	2	2	8.1	161	5.03	NA	NA	NA	1.333
109728	13501.47356	14943.40546	2	34	3	17	3.8	62	18	26	11	103	113	0.92	3.1	4.88	30	85	178	282	3.2	4	142	0.4	8.9	171	6.9	120	7	59.1	NA	NA	2	5.5	NA	NA	2	1	1	2	32.1	551	5.83	NA	NA	NA	0.206
109729	15138.94613	16419.35486	2	15	3	19	4	90	14	19	10	108	80	0.6	3.1	4.77	15	84	165	281	2.5	4.4	142	0.2	9	184	7.1	146	5.5	40	NA	NA	2	NA	NA	NA	NA	NA	NA	NA	49.4	145	34.07	0.77	0.56	20.19	0.213
109730	9682.671931	10467.51723	2	29	4	8	3.8	80	14	23	7	102	175	0.75	3.9	5.44	12	32	118	274	4.4	3.8	138	0.5	9.5	147	7.7	74	5.3	39	NA	NA	2	5.66	NA	NA	2	1	1	2	22	469	4.69	1.44	0.84	9.59	0.265
109731	30438.7821	33934.25976	2	21	2	10	4	67	13	29	6	101	93	0.72	3.1	4.83	11	34	163	284	2.9	3.9	144	0.6	9	178	7.1	65	2.8	24.3	NA	NA	2	5.38	NA	NA	2	2	2	2	2.8	55	5.09	NA	NA	NA	1.063
109732	23026.25096	0	2	9	3	NA	NA	NA	NA	NA	NA	NA	NA	NA	NA	NA	NA	NA	NA	NA	NA	NA	NA	NA	NA	NA	NA	NA	NA	NA	NA	NA	2	NA	NA	NA	NA	NA	NA	NA	NA	NA	NA	NA	NA	NA	NA
109733	2368.300106	2824.935898	1	7	4	NA	NA	NA	NA	NA	NA	NA	NA	NA	NA	NA	NA	NA	NA	NA	NA	NA	NA	NA	NA	NA	NA	NA	NA	16.4	NA	NA	2	NA	NA	NA	NA	NA	NA	NA	3	41	7.32	NA	NA	NA	NA
109734	3924.259702	4252.0107	1	3	4	NA	NA	NA	NA	NA	NA	NA	NA	NA	NA	NA	NA	NA	NA	NA	NA	NA	NA	NA	NA	NA	NA	NA	NA	15.8	NA	NA	2	NA	NA	NA	NA	NA	NA	NA	9	104	8.65	0.15	0.56	NA	NA
109735	6228.363044	6698.718133	1	33	5	28	4.3	78	35	24	13	102	297	0.73	2.9	5.11	141	181	160	277	2.6	3.7	139	0.6	9.1	184	7.2	184	6.4	22.1	NA	NA	2	5.27	NA	NA	2	2	2	2	17	314	5.41	5.77	7	140.41	0.223
109736	3176.740663	3681.421631	1	0	1	NA	NA	NA	NA	NA	NA	NA	NA	NA	NA	NA	NA	NA	NA	NA	NA	NA	NA	NA	NA	NA	NA	NA	NA	NA	NA	NA	NA	NA	NA	NA	NA	NA	NA	NA	NA	NA	NA	NA	NA	NA	NA
109737	28358.82109	33144.09986	1	2	2	NA	NA	NA	NA	NA	NA	NA	NA	NA	NA	NA	NA	NA	NA	NA	NA	NA	NA	NA	NA	NA	NA	NA	NA	19.8	NA	NA	2	NA	NA	NA	NA	NA	NA	NA	NA	NA	NA	NA	NA	NA	NA
109738	4328.766684	4687.346662	2	2	4	NA	NA	NA	NA	NA	NA	NA	NA	NA	NA	NA	NA	NA	NA	NA	NA	NA	NA	NA	NA	NA	NA	NA	NA	17.3	NA	NA	2	NA	NA	NA	NA	NA	NA	NA	NA	NA	NA	NA	NA	NA	NA
109739	6704.788215	7991.127474	1	80	3	11	3.8	83	17	28	20	98	95	0.97	3.3	4.61	15	74	142	281	4	4.3	140	0.6	9.4	193	7.1	97	5.6	30	1	2	1	NA	2	2	2	2	1	2	845.5	89	950	NA	NA	NA	2.025
109740	7086.099079	7666.672073	1	46	4	57	4.4	91	33	24	14	98	331	1.02	3.2	6.16	192	123	130	277	3.8	3.7	138	1.1	9.4	222	7.6	401	8	28	NA	2	2	6.49	NA	NA	2	2	2	2	24.6	294	8.37	NA	NA	NA	0.47
109741	2136.12194	2254.507131	2	6	5	NA	NA	NA	NA	NA	NA	NA	NA	NA	NA	NA	NA	NA	NA	NA	NA	NA	NA	NA	NA	NA	NA	NA	NA	17.6	NA	NA	2	NA	NA	NA	NA	NA	NA	NA	15.8	115	13.74	NA	NA	NA	NA
109742	14062.71936	17577.35699	1	80	3	6	4.4	68	13	24	15	99	94	0.87	3.1	7.16	23	132	111	278	3.2	4.1	138	0.4	9.3	133	7.5	263	7	27.6	0	1	1	7.66	2	2	2	2	1	2	17.9	38	47.11	NA	NA	NA	0.512
109743	20040.94338	20584.54302	1	56	4	NA	NA	NA	NA	NA	NA	NA	NA	NA	NA	NA	NA	NA	NA	NA	NA	NA	NA	NA	NA	NA	NA	NA	NA	30.6	0	1	2	NA	2	2	1	1	2	2	89	91	97.8	0.08	0.56	2.11	1.762
109744	3427.133058	4114.801149	1	8	4	NA	NA	NA	NA	NA	NA	NA	NA	NA	NA	NA	NA	NA	NA	NA	NA	NA	NA	NA	NA	NA	NA	NA	NA	20.8	NA	NA	2	NA	NA	NA	NA	NA	NA	NA	6.5	110	5.91	NA	NA	NA	0.683
109745	4221.00965	4478.462713	1	7	4	NA	NA	NA	NA	NA	NA	NA	NA	NA	NA	NA	NA	NA	NA	NA	NA	NA	NA	NA	NA	NA	NA	NA	NA	18.8	NA	NA	2	NA	NA	NA	NA	NA	NA	NA	6.2	82	7.56	NA	NA	NA	0.615
109746	3713.770492	3845.124427	1	47	4	19	3.6	124	15	23	15	103	358	0.84	3.5	5.83	49	66	175	281	4	4.3	140	0.2	9.5	160	7.1	83	5.2	35.2	NA	2	2	6.22	NA	NA	2	2	2	2	3.7	62	5.97	NA	NA	NA	2.268
109747	66450.48301	77818.81743	2	74	3	18	3.9	58	29	27	10	103	63	0.79	2.4	4.66	20	98	161	281	3.2	4.6	142	0.3	9	200	6.3	112	4.9	30.7	1	2	2	5.11	1	2	2	2	2	2	7.7	99	7.78	0.49	0.56	8.52	0.478
109748	34077.13917	36587.85492	1	11	2	NA	NA	NA	NA	NA	NA	NA	NA	NA	NA	NA	NA	NA	NA	NA	NA	NA	NA	NA	NA	NA	NA	NA	NA	15.6	NA	NA	2	NA	NA	NA	NA	NA	NA	NA	3.3	57	5.79	NA	NA	NA	0.482
109749	4253.018844	4488.723762	2	6	4	NA	NA	NA	NA	NA	NA	NA	NA	NA	NA	NA	NA	NA	NA	NA	NA	NA	NA	NA	NA	NA	NA	NA	NA	19.7	NA	NA	2	NA	NA	NA	NA	NA	NA	NA	20.6	38	54.21	NA	NA	NA	NA
109750	19307.68898	19218.52198	1	16	3	11	4.7	82	18	26	14	102	96	0.96	2.5	5.33	14	98	119	291	3.9	4.2	146	0.7	10.2	131	7.2	116	5.5	23.1	NA	NA	2	5.66	NA	NA	NA	1	NA	NA	6.4	192	3.33	NA	NA	NA	0.439
109751	36861.32744	41923.01022	2	10	3	NA	NA	NA	NA	NA	NA	NA	NA	NA	NA	NA	NA	NA	NA	NA	NA	NA	NA	NA	NA	NA	NA	NA	NA	17.2	NA	NA	2	NA	NA	NA	NA	NA	NA	NA	2.9	36	8.06	NA	NA	NA	NA
109752	9888.450405	10596.73747	1	14	4	13	4.1	421	NA	25	10	100	NA	0.52	3.2	5.11	83	28	NA	278	4.4	NA	140	0.1	9.1	203	7.3	93	4.6	NA	NA	NA	2	NA	NA	NA	NA	NA	NA	NA	NA	NA	NA	NA	NA	NA	NA
109753	4136.01184	4670.853933	2	3	4	NA	NA	NA	NA	NA	NA	NA	NA	NA	NA	NA	NA	NA	NA	NA	NA	NA	NA	NA	NA	NA	NA	NA	NA	NA	NA	NA	2	NA	NA	NA	NA	NA	NA	NA	32.7	98	33.37	0.08	0.56	NA	NA
109754	32514.87067	37283.29571	2	47	3	18	4.1	57	20	26	21	103	80	0.86	2.8	5.44	13	76	144	288	4.3	4	143	0.1	8.7	170	6.9	145	3.5	30.4	NA	2	2	NA	NA	NA	2	2	2	2	3.2	129	2.48	NA	NA	NA	NA
109755	13021.51956	0	1	23	2	NA	NA	NA	NA	NA	NA	NA	NA	NA	NA	NA	NA	NA	NA	NA	NA	NA	NA	NA	NA	NA	NA	NA	NA	NA	NA	NA	2	NA	NA	NA	2	2	2	1	NA	NA	NA	NA	NA	NA	NA
109756	4052.767276	0	1	72	3	NA	NA	NA	NA	NA	NA	NA	NA	NA	NA	NA	NA	NA	NA	NA	NA	NA	NA	NA	NA	NA	NA	NA	NA	NA	NA	1	2	NA	2	2	2	1	2	2	NA	NA	NA	NA	NA	NA	NA
109757	12412.21419	13029.28704	2	30	5	NA	NA	NA	NA	NA	NA	NA	NA	NA	NA	NA	NA	NA	NA	NA	NA	NA	NA	NA	NA	NA	NA	NA	NA	35.1	NA	NA	2	NA	NA	NA	2	2	2	2	NA	NA	NA	NA	NA	NA	NA
109758	10393.68765	11072.91654	1	26	4	19	3.8	44	28	27	16	102	541	1.08	3.5	4.27	29	54	167	281	5	4	141	0.2	8.8	127	7.3	61	6.2	20.3	NA	NA	2	4.83	NA	NA	2	2	2	2	6.7	191	3.51	0.08	0.56	6.73	0.98
109759	12498.03074	0	1	57	5	NA	NA	NA	NA	NA	NA	NA	NA	NA	NA	NA	NA	NA	NA	NA	NA	NA	NA	NA	NA	NA	NA	NA	NA	NA	NA	2	3	NA	2	2	1	2	1	2	NA	NA	NA	NA	NA	NA	NA
109760	18287.26886	19223.70585	1	53	2	21	4.6	90	19	25	17	102	70	1.07	2.8	4.44	20	94	144	280	3.6	4.3	140	0.3	10.1	204	7.4	153	3.6	27.4	1	2	2	NA	1	2	2	2	2	2	3.9	130	3	0.7	0.56	7.99	1.745
109761	21908.7022	22754.03158	2	19	4	11	4.2	55	16	25	10	102	131	0.72	3.4	4.61	16	239	158	274	3.5	4	138	0.7	9.2	171	7.6	62	5.1	20.8	NA	NA	2	NA	NA	NA	NA	2	NA	NA	6.2	178	3.48	1	0.56	20.02	0.427
109762	27008.33895	30396.62661	1	9	3	NA	NA	NA	NA	NA	NA	NA	NA	NA	NA	NA	NA	NA	NA	NA	NA	NA	NA	NA	NA	NA	NA	NA	NA	15.5	NA	NA	2	NA	NA	NA	NA	NA	NA	NA	19.6	235	8.34	0.68	0.56	5.17	0.198
109763	4543.742293	4693.084754	1	78	4	10	3.4	65	19	22	29	108	171	1.27	3.9	5.22	18	90	212	285	3	4.2	140	0.3	9.3	167	7.3	91	8.8	26.5	1	2	1	NA	2	2	2	2	2	2	1902	126	1509.52	NA	NA	NA	0.665
109764	10851.45393	11888.24779	1	69	5	24	4.3	59	22	24	16	101	121	1.15	2.8	4.88	32	116	218	278	4.3	4.3	139	0.5	9.1	167	7.1	137	7.4	26.9	1	2	2	NA	1	2	2	2	2	2	5.8	20	29	NA	NA	NA	3.303
109765	21546.11797	24203.21404	2	51	3	14	3.8	72	16	23	17	105	201	0.72	3.2	5.44	14	55	154	288	3.8	4	144	0.2	9.2	186	7	137	5.5	28.9	1	1	2	NA	2	2	2	2	2	2	23.8	89	26.74	NA	NA	NA	1.108
109766	4102.899872	4314.157026	2	9	4	NA	NA	NA	NA	NA	NA	NA	NA	NA	NA	NA	NA	NA	NA	NA	NA	NA	NA	NA	NA	NA	NA	NA	NA	17.2	NA	NA	2	NA	NA	NA	NA	NA	NA	NA	9.4	35	26.86	NA	NA	NA	0.687
109767	16221.31088	0	1	61	5	NA	NA	NA	NA	NA	NA	NA	NA	NA	NA	NA	NA	NA	NA	NA	NA	NA	NA	NA	NA	NA	NA	NA	NA	NA	NA	2	2	NA	2	2	2	1	1	2	NA	NA	NA	NA	NA	NA	NA
109768	64626.24979	70482.85874	1	32	3	22	4.5	59	20	27	14	100	116	0.82	3.1	4.94	52	197	148	277	3.9	4.2	139	0.6	9.5	167	7.6	95	6.8	25	NA	NA	2	NA	NA	NA	2	2	2	2	6.1	140	4.36	NA	NA	NA	1.078
109769	11299.20871	11865.54296	1	44	3	134	4.4	69	86	25	9	101	77	0.77	4	5.22	141	114	143	278	2.6	4.2	140	0.6	9	145	8.4	56	6.6	27.8	NA	1	2	5.72	NA	NA	2	2	1	2	17.3	41	42.2	NA	NA	NA	2
109770	21917.09373	22661.76072	2	47	4	22	3.9	162	19	25	13	104	112	0.8	3.5	5.27	15	78	151	289	3.9	3.9	145	0.1	9.3	243	7.4	202	5.5	26.1	NA	2	2	NA	NA	NA	1	2	2	2	24.1	92	26.2	NA	NA	NA	0.823
109771	17931.2796	19650.41136	2	79	4	16	4.3	94	27	26	18	104	138	0.9	3	5.44	23	59	232	283	3.5	4.3	141	0.4	9.2	124	7.3	91	3.3	21.7	0	1	2	NA	2	2	2	2	2	2	14.3	194	7.37	NA	NA	NA	NA
109772	4562.872772	4820.356432	2	11	5	NA	NA	NA	NA	NA	NA	NA	NA	NA	NA	NA	NA	NA	NA	NA	NA	NA	NA	NA	NA	NA	NA	NA	NA	31.7	NA	NA	2	NA	NA	NA	NA	NA	NA	NA	24.7	161	15.34	NA	NA	NA	0.208
109773	7621.027832	7769.468801	2	16	1	NA	NA	NA	NA	NA	NA	NA	NA	NA	NA	NA	NA	NA	NA	NA	NA	NA	NA	NA	NA	NA	NA	NA	NA	20.6	NA	NA	2	NA	NA	NA	NA	2	NA	NA	16.4	197	8.32	NA	NA	NA	NA
109774	36636.6536	44313.76586	2	80	3	7	4.3	109	17	27	14	98	74	0.53	3.1	5.11	32	89	167	276	3.8	4.8	138	0.4	9.4	240	7.4	98	4.2	32.6	0	2	2	5.77	2	2	2	2	2	2	136.1	166	81.99	NA	NA	NA	0.29
109775	7165.39166	8209.238271	1	2	3	NA	NA	NA	NA	NA	NA	NA	NA	NA	NA	NA	NA	NA	NA	NA	NA	NA	NA	NA	NA	NA	NA	NA	NA	18.1	NA	NA	2	NA	NA	NA	NA	NA	NA	NA	NA	NA	NA	NA	NA	NA	NA
109776	15527.55694	17430.22467	2	80	3	11	3.9	98	16	24	18	104	74	0.71	3.3	6.88	30	45	158	286	3.9	3.9	142	0.5	9	154	7.2	204	4.2	29.5	0	1	1	7.38	2	2	2	1	2	2	98.4	111	88.65	NA	NA	NA	0.185
109777	6102.461176	6619.615003	2	13	4	9	4.2	97	22	23	9	101	147	0.62	3.3	5.11	8	87	205	278	3.4	4.4	140	0.2	9.4	133	7.5	49	3.6	18.9	NA	NA	2	5.44	NA	NA	NA	NA	NA	NA	10.6	211	5.02	0.76	0.56	9.81	2.01
109778	6875.945265	7294.123207	2	12	5	11	4	247	18	25	10	101	168	0.71	2.4	5.05	8	86	104	278	4.8	4.3	140	0.3	9.7	132	6.4	116	4.8	17.8	NA	NA	2	NA	NA	NA	NA	NA	NA	NA	6.5	51	12.75	NA	NA	NA	1.507
109779	15933.72585	17001.31012	2	6	3	NA	NA	NA	NA	NA	NA	NA	NA	NA	NA	NA	NA	NA	NA	NA	NA	NA	NA	NA	NA	NA	NA	NA	NA	15.1	NA	NA	2	NA	NA	NA	NA	NA	NA	NA	6.6	64	10.31	NA	NA	NA	0.348
109780	4291.533323	4539.318882	2	66	4	11	3.9	96	13	26	14	101	84	1	3.4	4.88	24	45	195	287	5.5	3.7	144	0.3	8.6	141	7.3	139	5.3	33.7	1	1	2	NA	2	1	1	2	2	1	6.7	109	6.15	NA	NA	NA	0.583
109781	13355.45376	15253.83438	2	16	5	10	4.3	82	18	23	10	102	95	0.9	3.2	4.72	8	60	141	276	4.5	4.4	139	0.3	9	137	7.5	71	5	23.8	NA	NA	2	NA	NA	NA	NA	2	NA	NA	1.8	42	4.29	NA	NA	NA	1.838
109782	133430.5487	135472.6962	2	63	3	11	3.7	121	13	26	9	103	43	0.76	3.5	5.66	9	74	155	278	4.2	3.8	140	0.3	9.3	177	7.2	91	5.2	26.3	1	1	2	6.22	1	2	1	2	1	2	2.2	34	6.47	NA	NA	NA	NA
109783	6111.118031	6355.483608	1	61	4	18	3.7	69	17	26	7	102	334	0.96	3.5	5.72	45	81	121	278	3	3.6	140	0.2	9.5	225	7.2	223	6.1	32.3	1	1	1	NA	2	2	2	1	2	2	4.9	96	5.1	NA	NA	NA	1.12
109784	10441.44524	11749.42338	1	4	3	NA	NA	NA	NA	NA	NA	NA	NA	NA	NA	NA	NA	NA	NA	NA	NA	NA	NA	NA	NA	NA	NA	NA	NA	15	NA	NA	2	NA	NA	NA	NA	NA	NA	NA	9.6	28	34.29	0.08	0.56	2.63	NA
109785	8573.013539	9269.126561	1	48	4	83	3.4	74	30	26	15	104	179	1.07	2.4	5.16	291	91	NA	287	4.9	4	144	0.4	8.7	207	5.8	226	6.8	32.2	NA	1	2	NA	NA	NA	2	1	1	2	5.6	180	3.11	NA	NA	NA	NA
109786	31387.12656	0	2	24	4	NA	NA	NA	NA	NA	NA	NA	NA	NA	NA	NA	NA	NA	NA	NA	NA	NA	NA	NA	NA	NA	NA	NA	NA	NA	NA	NA	2	NA	NA	NA	2	2	2	2	NA	NA	NA	NA	NA	NA	NA
109787	29458.13923	32053.50222	1	5	3	NA	NA	NA	NA	NA	NA	NA	NA	NA	NA	NA	NA	NA	NA	NA	NA	NA	NA	NA	NA	NA	NA	NA	NA	17.3	NA	NA	2	NA	NA	NA	NA	NA	NA	NA	7.2	68	10.59	0.15	0.56	3.46	NA
109788	9697.101944	10757.16896	1	3	3	NA	NA	NA	NA	NA	NA	NA	NA	NA	NA	NA	NA	NA	NA	NA	NA	NA	NA	NA	NA	NA	NA	NA	NA	16.7	NA	NA	2	NA	NA	NA	NA	NA	NA	NA	2.8	21	13.33	0.08	0.56	1.62	NA
109789	99400.85043	99389.09768	2	32	3	17	4.4	94	16	27	13	101	83	0.83	3.1	4.55	18	58	156	282	3.9	4.2	142	0.6	9.5	184	7.5	71	5.3	44.7	NA	NA	2	NA	NA	NA	2	1	2	2	1.8	29	6.21	NA	NA	NA	2.008
109790	24152.10609	0	2	7	3	NA	NA	NA	NA	NA	NA	NA	NA	NA	NA	NA	NA	NA	NA	NA	NA	NA	NA	NA	NA	NA	NA	NA	NA	NA	NA	NA	2	NA	NA	NA	NA	NA	NA	NA	NA	NA	NA	NA	NA	NA	NA
109791	11855.86901	12630.65166	1	28	4	13	3.9	40	17	28	14	101	193	1.03	3.2	5.05	25	91	168	278	4.8	3.9	139	0.2	9.5	176	7.1	71	4.4	33.5	NA	NA	2	5.27	NA	NA	2	1	2	2	9.7	273	3.55	NA	NA	NA	0.446
109792	5407.116887	5994.656904	1	6	2	NA	NA	NA	NA	NA	NA	NA	NA	NA	NA	NA	NA	NA	NA	NA	NA	NA	NA	NA	NA	NA	NA	NA	NA	28.9	NA	NA	2	NA	NA	NA	NA	NA	NA	NA	6.6	100	6.6	NA	NA	NA	NA
109793	13733.79597	16875.55972	2	80	3	15	4.4	103	14	21	35	105	90	1.27	2.7	6.44	115	96	145	292	3	4.9	142	0.4	11.2	178	7.1	198	9.5	28.5	0	2	2	NA	2	2	2	1	2	1	59.1	107	55.23	0.08	0.56	1.95	0.4
109794	59682.82554	61023.07092	1	63	3	68	4.2	81	46	23	14	101	220	0.99	2.9	5.61	60	131	164	278	3.5	4.1	139	0.3	9.6	206	7.1	189	6.1	34.9	0	2	2	5.88	2	2	2	1	2	2	8.9	137	6.5	NA	NA	NA	0.59
109795	51182.67329	55639.83923	1	13	3	21	4.7	243	21	23	16	104	365	0.71	2.4	4.39	8	48	NA	281	4.7	4.9	141	0.3	9.3	130	7.1	66	3.9	20.7	NA	NA	2	NA	NA	NA	NA	NA	NA	NA	157.6	131	120.31	NA	NA	NA	0.509
109796	5658.205774	0	2	44	4	NA	NA	NA	NA	NA	NA	NA	NA	NA	NA	NA	NA	NA	NA	NA	NA	NA	NA	NA	NA	NA	NA	NA	NA	NA	NA	2	2	NA	NA	NA	2	2	2	2	NA	NA	NA	NA	NA	NA	NA
109797	5560.518359	5957.617489	1	9	4	NA	NA	NA	NA	NA	NA	NA	NA	NA	NA	NA	NA	NA	NA	NA	NA	NA	NA	NA	NA	NA	NA	NA	NA	NA	NA	NA	2	NA	NA	NA	NA	NA	NA	NA	2320	273	849.82	NA	NA	NA	NA
109798	18457.64131	19861.55452	2	10	4	NA	NA	NA	NA	NA	NA	NA	NA	NA	NA	NA	NA	NA	NA	NA	NA	NA	NA	NA	NA	NA	NA	NA	NA	19.4	NA	NA	2	NA	NA	NA	NA	NA	NA	NA	10.8	203	5.32	NA	NA	NA	NA
109799	19330.56946	21929.02373	2	3	1	NA	NA	NA	NA	NA	NA	NA	NA	NA	NA	NA	NA	NA	NA	NA	NA	NA	NA	NA	NA	NA	NA	NA	NA	17.8	NA	NA	2	NA	NA	NA	NA	NA	NA	NA	19	144	13.19	0.66	0.56	8.65	NA
109800	14999.4712	16638.74104	1	31	5	18	3.9	71	16	28	18	101	199	1.06	2.8	4.94	20	71	154	281	4.2	4.4	140	0.2	9.8	238	6.7	134	5.2	30.9	NA	NA	2	NA	NA	NA	2	2	2	2	2.3	101	2.28	NA	NA	NA	NA
109801	5200.062264	5902.925881	1	6	5	NA	NA	NA	NA	NA	NA	NA	NA	NA	NA	NA	NA	NA	NA	NA	NA	NA	NA	NA	NA	NA	NA	NA	NA	13.9	NA	NA	2	NA	NA	NA	NA	NA	NA	NA	18.5	110	16.82	NA	NA	NA	NA
109802	18463.58725	20559.78279	1	25	3	14	4.3	85	17	22	16	103	180	1.04	2.9	5.27	11	87	158	277	5.2	4	138	0.3	9.6	179	7.2	128	5.1	30.6	NA	NA	2	NA	NA	NA	2	2	2	2	3	227	1.32	NA	NA	NA	0.78
109803	13660.27468	15227.60795	2	56	4	16	2.9	249	37	22	3	101	375	0.52	4.3	7.72	110	48	NA	276	3.9	3.7	139	0.6	8.3	137	7.2	68	7.3	23.9	NA	1	2	7.94	2	1	2	2	2	2	21.2	258	8.22	NA	NA	NA	0.075
109804	36625.36768	37305.26791	2	16	1	27	4.1	55	20	25	9	99	138	0.67	3.2	5.05	17	135	140	276	3.9	4.1	139	0.3	9.1	209	7.3	150	4.3	24	NA	NA	2	5.55	NA	NA	NA	2	NA	NA	6.5	142	4.58	0.08	0.56	4.19	0.505
109805	21454.87528	22922.76485	2	43	4	7	3.2	82	11	24	7	105	64	0.72	3.9	5.44	15	19	137	279	2.9	3.8	141	0.2	8.8	167	7.1	76	5.7	51.3	NA	1	2	5.83	NA	NA	2	1	2	2	85	113	75.22	0.08	0.56	4.9	0.967
109806	24489.43674	26762.28921	2	25	4	14	3.9	74	12	23	8	107	68	0.7	3.1	5.27	11	38	124	281	1.6	4.3	142	0.3	10.3	118	7	83	5.2	47.5	NA	NA	2	NA	NA	NA	2	1	2	2	4.3	129	3.33	NA	NA	NA	0.798
109807	150347.1852	167376.122	1	31	3	14	4.3	59	20	26	13	100	402	0.94	2.6	5	12	134	147	279	3.4	3.8	140	1.1	9.4	164	6.9	95	5.7	23.2	NA	NA	2	5.44	NA	NA	2	2	2	2	5.8	146	3.97	NA	NA	NA	0.698
109808	30129.48086	33700.89872	1	3	3	NA	NA	NA	NA	NA	NA	NA	NA	NA	NA	NA	NA	NA	NA	NA	NA	NA	NA	NA	NA	NA	NA	NA	NA	16.8	NA	NA	2	NA	NA	NA	NA	NA	NA	NA	1.9	19	10	0.34	0.56	1.97	NA
109809	72753.12342	78041.08698	2	20	3	10	4	123	17	25	9	105	77	0.74	2.9	4.5	14	66	117	283	3.5	4.2	143	0.7	9.4	143	6.9	58	4	22.1	NA	NA	2	4.72	NA	NA	2	2	2	2	8	175	4.57	NA	NA	NA	0.226
109810	57918.77083	63133.46461	2	16	3	17	4.1	86	31	24	13	102	570	0.74	2.5	4.39	9	76	194	282	4	4.3	142	0.2	9.2	138	6.6	79	6.1	33	NA	NA	2	4.88	NA	NA	NA	1	NA	NA	2.7	101	2.67	NA	NA	NA	0.442
109811	12061.59157	13450.94477	1	52	5	23	4.3	87	20	26	10	100	156	0.86	2.9	5.05	24	87	122	278	3.7	4.5	140	0.3	9.5	182	7.2	149	5.1	26.8	0	1	2	NA	2	2	2	2	2	2	6.6	134	4.93	1.45	0.56	22.03	1.54
109812	7614.851472	8564.919715	2	72	4	27	3.6	81	23	27	16	101	106	0.88	3.2	5.05	26	101	148	282	3.5	4	141	0.2	9.9	221	6.8	151	5.1	26.4	0	2	2	NA	2	2	2	2	2	2	5.1	93	5.48	NA	NA	NA	0.588
109813	43227.10159	46797.79073	1	32	1	30	4.3	66	22	25	16	97	149	0.73	3.2	5.38	82	151	111	271	3	3.6	135	0.2	9	259	7.5	196	5.3	31.7	NA	NA	2	NA	NA	NA	2	2	2	2	1.4	30	4.67	NA	NA	NA	2.152
109814	9390.066001	10599.28223	2	29	4	9	4.3	66	14	25	15	101	128	0.66	3.2	4.55	16	80	137	276	3.6	3.7	138	0.5	9.3	204	7.5	55	3.8	22.9	NA	NA	2	4.61	NA	NA	2	2	2	2	15	179	8.38	NA	NA	NA	0.432
109815	10156.76699	10483.11199	2	52	4	13	3.9	57	17	27	13	100	193	0.89	3.2	5.16	16	85	182	283	3.5	3.4	142	0.2	8.9	168	7.1	80	8.1	38.2	1	2	2	5.66	2	2	2	1	2	2	467	116	402.59	NA	NA	NA	0.701
109816	70993.82947	71981.05794	2	55	3	16	3.6	70	22	30	17	98	102	0.76	3	4.44	10	113	188	280	3.9	4.5	140	0.5	9.2	171	6.6	88	3.8	19.7	0	2	2	NA	2	2	2	2	2	2	26.8	155	17.29	0.08	0.56	10.35	0.054
109817	15662.24455	16538.70071	2	36	5	6	4	42	19	25	13	100	133	0.73	3.3	4.33	27	145	156	278	3.2	4	140	0.6	9.2	232	7.3	73	4.3	19.4	NA	NA	2	4.66	NA	NA	2	2	2	2	4.2	74	5.68	0.08	0.81	24.39	1.72
109818	10168.83288	0	2	5	4	NA	NA	NA	NA	NA	NA	NA	NA	NA	NA	NA	NA	NA	NA	NA	NA	NA	NA	NA	NA	NA	NA	NA	NA	NA	NA	NA	2	NA	NA	NA	NA	NA	NA	NA	NA	NA	NA	NA	NA	NA	NA
109819	6721.625728	8077.508319	2	1	2	NA	NA	NA	NA	NA	NA	NA	NA	NA	NA	NA	NA	NA	NA	NA	NA	NA	NA	NA	NA	NA	NA	NA	NA	NA	NA	NA	2	NA	NA	NA	NA	NA	NA	NA	NA	NA	NA	NA	NA	NA	NA
109820	21439.68496	23443.53258	2	29	1	10	4.1	57	13	23	9	104	71	0.62	2.8	4.77	14	80	127	279	3.6	3.9	141	0.5	9.1	237	6.9	211	4.4	34.6	NA	NA	2	NA	NA	NA	2	1	2	2	6.5	95	6.84	NA	NA	NA	1.26
109821	8594.294386	9357.273263	1	19	4	23	4.3	69	20	25	18	104	285	0.84	3.3	5	18	66	NA	283	4.3	4.7	141	0.3	9.6	160	7.6	41	5.1	31.1	NA	NA	2	NA	NA	NA	NA	1	NA	NA	4.4	149	2.95	0.08	0.56	2.69	NA
109822	11368.27275	11988.34332	2	16	4	10	4.2	84	17	26	13	103	145	0.74	3	5.44	12	132	170	285	5	3.9	143	0.7	9.2	152	7.2	57	3.7	25.4	NA	NA	2	NA	NA	NA	NA	2	NA	NA	44.4	279	15.91	NA	NA	NA	NA
109823	6101.213696	6659.065605	2	80	5	NA	NA	NA	NA	NA	NA	NA	NA	NA	NA	NA	NA	NA	NA	NA	NA	NA	NA	NA	NA	NA	NA	NA	NA	28.5	1	1	2	NA	2	2	1	1	2	2	715	60	1191.67	NA	NA	NA	0.424
109824	4838.753855	0	2	10	1	NA	NA	NA	NA	NA	NA	NA	NA	NA	NA	NA	NA	NA	NA	NA	NA	NA	NA	NA	NA	NA	NA	NA	NA	NA	NA	NA	2	NA	NA	NA	NA	NA	NA	NA	NA	NA	NA	NA	NA	NA	NA
109825	62164.7303	68640.95565	1	22	2	13	4	72	13	25	7	103	104	0.74	2.9	5.16	23	56	89	275	3.8	4.1	139	0.2	8.9	154	6.9	152	4.8	26.9	NA	NA	2	NA	NA	NA	2	2	2	2	10.2	205	4.98	1.12	0.56	9.02	0.249
109826	18489.28441	22014.09394	1	1	2	NA	NA	NA	NA	NA	NA	NA	NA	NA	NA	NA	NA	NA	NA	NA	NA	NA	NA	NA	NA	NA	NA	NA	NA	NA	NA	NA	2	NA	NA	NA	NA	NA	NA	NA	NA	NA	NA	NA	NA	NA	NA
109827	5307.038866	6126.194169	2	1	4	NA	NA	NA	NA	NA	NA	NA	NA	NA	NA	NA	NA	NA	NA	NA	NA	NA	NA	NA	NA	NA	NA	NA	NA	NA	NA	NA	2	NA	NA	NA	NA	NA	NA	NA	NA	NA	NA	NA	NA	NA	NA
109828	14377.21817	15902.16045	1	34	5	14	4.5	41	18	29	15	100	159	1.21	3.3	4.88	12	92	162	283	3.4	3.8	142	0.7	9.1	174	7.8	120	6.3	22.4	NA	NA	2	5.38	NA	NA	2	2	2	2	NA	NA	NA	NA	NA	NA	NA
109829	5923.252662	6291.56336	2	13	4	12	4	162	13	27	11	97	76	0.53	4	4.5	20	39	126	278	4.4	3.9	140	0.5	9.8	156	8	122	2.9	30.2	NA	NA	2	NA	NA	NA	NA	NA	NA	NA	4.3	48	8.96	NA	NA	NA	0.245
109830	2607.557952	2814.402731	1	2	4	NA	NA	NA	NA	NA	NA	NA	NA	NA	NA	NA	NA	NA	NA	NA	NA	NA	NA	NA	NA	NA	NA	NA	NA	15.6	NA	NA	2	NA	NA	NA	NA	NA	NA	NA	NA	NA	NA	NA	NA	NA	NA
109831	113475.6875	129350.6312	1	50	3	45	4.3	71	23	23	11	98	101	1.02	2.9	5.05	102	153	141	277	3.4	4.1	139	0.5	9.7	287	7.2	191	5	24.8	0	2	2	5.55	2	2	2	2	1	2	9.6	88	10.91	0.08	0.56	6.68	0.905
109832	13334.13184	14983.60135	1	5	3	NA	NA	NA	NA	NA	NA	NA	NA	NA	NA	NA	NA	NA	NA	NA	NA	NA	NA	NA	NA	NA	NA	NA	NA	14.6	NA	NA	2	NA	NA	NA	NA	NA	NA	NA	48.7	39	124.87	0.08	0.56	28.56	NA
109833	14959.57019	0	1	6	2	NA	NA	NA	NA	NA	NA	NA	NA	NA	NA	NA	NA	NA	NA	NA	NA	NA	NA	NA	NA	NA	NA	NA	NA	NA	NA	NA	2	NA	NA	NA	NA	NA	NA	NA	NA	NA	NA	NA	NA	NA	NA
109834	11953.01078	12955.55747	2	11	1	NA	NA	NA	NA	NA	NA	NA	NA	NA	NA	NA	NA	NA	NA	NA	NA	NA	NA	NA	NA	NA	NA	NA	NA	34.1	NA	NA	1	NA	NA	NA	NA	NA	NA	NA	9.8	72	13.61	NA	NA	NA	2.189
109835	4780.736782	0	1	11	4	NA	NA	NA	NA	NA	NA	NA	NA	NA	NA	NA	NA	NA	NA	NA	NA	NA	NA	NA	NA	NA	NA	NA	NA	NA	NA	NA	2	NA	NA	NA	NA	NA	NA	NA	NA	NA	NA	NA	NA	NA	NA
109836	8896.920072	9832.401443	1	30	4	66	3.9	114	72	29	14	99	150	0.98	3.6	4.72	120	139	230	283	4.7	4.1	142	0.5	9.4	153	7.5	144	4.9	22.3	NA	NA	2	4.83	NA	NA	2	2	2	2	7.2	120	6	NA	NA	NA	0.878
109837	23963.73363	24254.18498	2	18	2	NA	NA	NA	NA	NA	NA	NA	NA	NA	NA	NA	NA	NA	NA	NA	NA	NA	NA	NA	NA	NA	NA	NA	NA	24.4	NA	NA	2	NA	NA	NA	NA	2	NA	NA	22.7	248	9.15	NA	NA	NA	0.297
109838	15136.20454	17935.13008	1	5	3	NA	NA	NA	NA	NA	NA	NA	NA	NA	NA	NA	NA	NA	NA	NA	NA	NA	NA	NA	NA	NA	NA	NA	NA	14.4	NA	NA	2	NA	NA	NA	NA	NA	NA	NA	4.8	54	8.89	0.08	0.56	3.11	NA
109839	7194.728436	7404.206305	2	66	4	6	3.8	109	10	24	18	101	80	0.82	3.6	12.6	18	69	207	290	2.9	4	141	0.4	9.4	197	7.4	98	6.8	45.3	1	1	1	NA	2	2	2	1	2	2	326.5	223	146.41	NA	NA	NA	0.101
109840	9303.342229	10018.56032	2	10	2	NA	NA	NA	NA	NA	NA	NA	NA	NA	NA	NA	NA	NA	NA	NA	NA	NA	NA	NA	NA	NA	NA	NA	NA	15.2	NA	NA	2	NA	NA	NA	NA	NA	NA	NA	9.4	73	12.88	NA	NA	NA	0.531
109841	31885.70403	30742.2106	2	54	3	19	3.1	58	20	23	12	101	176	0.92	3.4	9.77	17	55	172	285	3.7	3.6	141	0.4	9	151	6.5	147	5.4	39.5	0	2	1	10.2	2	2	2	1	2	2	214	261	81.99	NA	NA	NA	0.287
109842	15266.48299	17220.08332	1	14	3	NA	NA	NA	NA	NA	NA	NA	NA	NA	NA	NA	NA	NA	NA	NA	NA	NA	NA	NA	NA	NA	NA	NA	NA	17.1	NA	NA	2	NA	NA	NA	NA	NA	NA	NA	11.2	200	5.6	NA	NA	NA	0.869
109843	45336.01657	48762.68045	1	35	1	35	4.3	87	19	27	13	95	66	0.54	3.2	16.1	44	117	160	292	2.6	3.5	141	1	9.7	251	7.5	1058	5.5	34.1	NA	NA	1	17.7	NA	NA	2	1	2	2	1385	112	1236.61	NA	NA	NA	0.552
109844	17414.37221	18905.24137	1	59	2	29	3.3	59	20	31	18	97	91	0.84	3.7	9.05	64	85	175	281	2.9	3.7	138	0.6	8.4	124	7	60	6.4	46.2	1	1	1	9.27	2	2	2	1	2	2	9.4	83	11.33	NA	NA	NA	0.559
109845	72651.78958	80180.03568	2	77	3	20	3.8	55	23	24	18	103	112	0.94	2.8	6.83	14	82	195	285	4	4.1	141	0.5	9.1	147	6.6	110	5.6	38.6	1	2	2	7.16	1	2	2	1	2	2	10.6	55	19.27	NA	NA	NA	0.185
109846	11404.25465	0	1	80	3	NA	NA	NA	NA	NA	NA	NA	NA	NA	NA	NA	NA	NA	NA	NA	NA	NA	NA	NA	NA	NA	NA	NA	NA	NA	NA	2	2	NA	2	2	1	2	2	2	NA	NA	NA	NA	NA	NA	NA
109847	19611.31772	21351.34606	1	15	4	28	4.2	174	22	27	10	101	300	0.93	3	4.94	24	65	145	278	3.9	4	140	0.4	9.8	154	7.2	61	7	43.1	NA	NA	2	NA	NA	NA	NA	NA	NA	NA	NA	NA	NA	NA	NA	NA	NA
109848	11385.8072	12148.64876	1	14	3	21	3.9	186	25	27	12	102	487	0.76	2.6	4.88	11	92	197	280	4.2	3.8	141	0.6	9.2	83	6.5	30	5.2	19.5	NA	NA	2	5.44	NA	NA	NA	NA	NA	NA	5.8	141	4.11	NA	NA	NA	0.812
109849	20516.22815	23291.23361	2	3	3	NA	NA	NA	NA	NA	NA	NA	NA	NA	NA	NA	NA	NA	NA	NA	NA	NA	NA	NA	NA	NA	NA	NA	NA	16.9	NA	NA	2	NA	NA	NA	NA	NA	NA	NA	NA	NA	NA	NA	NA	NA	NA
109850	18227.48651	18167.32721	2	50	1	15	4.1	59	15	27	15	101	113	0.76	3	5.27	19	79	153	284	4.6	3.8	142	0.2	9.4	191	7.1	86	3.5	26.8	0	2	2	NA	2	2	2	1	2	2	1.3	33	3.94	NA	NA	NA	4
109851	11394.01267	12133.46775	2	6	4	NA	NA	NA	NA	NA	NA	NA	NA	NA	NA	NA	NA	NA	NA	NA	NA	NA	NA	NA	NA	NA	NA	NA	NA	18.8	NA	NA	2	NA	NA	NA	NA	NA	NA	NA	13.7	117	11.71	0.99	0.56	6.27	NA
109852	31330.99939	34847.81167	2	20	2	15	3.5	106	17	28	7	106	69	0.57	3.4	4.77	8	108	143	286	3.7	3.9	145	0.4	9.1	212	6.9	141	3.5	20.4	NA	NA	2	5.38	NA	NA	2	2	2	2	19.9	110	18.09	NA	NA	NA	1.007
109853	8778.487252	9272.463736	2	7	1	NA	NA	NA	NA	NA	NA	NA	NA	NA	NA	NA	NA	NA	NA	NA	NA	NA	NA	NA	NA	NA	NA	NA	NA	22.4	NA	NA	2	NA	NA	NA	NA	NA	NA	NA	9.5	31	30.65	0.08	0.56	1.29	0.311
109854	44640.41122	47919.22219	1	67	5	15	3.9	66	18	25	19	101	60	0.68	3	5.38	12	70	120	282	3.5	4	140	0.4	8.9	190	6.9	74	5.3	19	0	1	2	5.72	2	2	2	2	2	2	6.6	58	11.38	NA	NA	NA	1.181
109855	9366.78483	10255.85173	1	29	1	19	4.8	63	20	26	19	103	130	0.99	2.7	4.22	15	125	141	288	3.8	4.1	144	0.5	9.3	167	7.5	108	5.4	23.2	NA	NA	2	NA	NA	NA	2	2	2	2	3.8	83	4.58	0.17	0.56	5.47	0.712
109856	8671.529417	8494.414609	2	54	2	NA	NA	NA	NA	NA	NA	NA	NA	NA	NA	NA	NA	NA	NA	NA	NA	NA	NA	NA	NA	NA	NA	NA	NA	34.1	1	2	2	NA	2	2	2	2	1	1	77.8	237	32.83	NA	NA	NA	0.4
109857	7426.753336	8088.422293	1	74	3	24	4.3	77	28	26	6	96	190	0.86	2.7	10.66	42	181	151	280	3.6	4.3	139	1.5	9.6	191	7	315	6.5	34.1	1	2	1	NA	1	2	1	2	2	2	111	250	44.4	0.08	0.56	11.31	0.257
109858	11436.72376	12474.16651	2	14	4	NA	NA	NA	NA	NA	NA	NA	NA	NA	NA	NA	NA	NA	NA	NA	NA	NA	NA	NA	NA	NA	NA	NA	NA	22.6	NA	NA	2	NA	NA	NA	NA	NA	NA	NA	NA	NA	NA	NA	NA	NA	NA
109859	4241.232271	4833.762956	2	13	4	NA	NA	NA	NA	NA	NA	NA	NA	NA	NA	NA	NA	NA	NA	NA	NA	NA	NA	NA	NA	NA	NA	NA	NA	23.6	NA	NA	2	NA	NA	NA	NA	NA	NA	NA	7.2	114	6.32	NA	NA	NA	0.398
109860	23272.95257	24637.51424	2	25	4	17	4.4	63	16	24	7	104	126	0.63	2.8	5	30	67	128	277	3.5	4.1	140	0.2	9.6	139	7.2	46	2.9	24	NA	NA	2	5.27	NA	NA	2	1	2	2	24.8	119	20.84	NA	NA	NA	0.889
109861	5439.017697	5906.344675	2	0	1	NA	NA	NA	NA	NA	NA	NA	NA	NA	NA	NA	NA	NA	NA	NA	NA	NA	NA	NA	NA	NA	NA	NA	NA	NA	NA	NA	NA	NA	NA	NA	NA	NA	NA	NA	NA	NA	NA	NA	NA	NA	NA
109862	8918.237837	8492.748882	2	41	2	12	3.8	91	16	25	16	104	89	0.62	3.1	4.72	9	25	147	284	3.8	4.2	142	0.1	9.1	208	6.9	134	3.7	35.9	NA	1	2	NA	NA	NA	1	1	2	2	20.5	100	20.5	NA	NA	NA	0.421
109863	6230.578816	6533.046006	2	64	5	16	4.4	106	20	26	18	99	181	1.19	3.4	4.94	22	69	162	284	3.5	4.6	142	0.3	10.9	217	7.8	136	7.9	25.4	NA	1	2	NA	2	2	1	2	2	2	26.9	147	18.3	NA	NA	NA	0.806
109864	50939.25676	55916.55091	2	75	3	16	4	69	18	28	14	103	95	0.6	2.6	5.33	12	90	183	283	3.3	4.8	142	0.6	9.3	267	6.6	80	3.8	26.2	0	2	2	5.66	1	2	2	2	2	2	4.4	57	7.72	NA	NA	NA	0.566
109865	4510.170318	4820.823433	2	33	4	15	3.7	83	17	24	9	103	170	0.53	4.1	5.11	17	82	134	272	3.7	4.1	137	0.4	9.4	258	7.8	134	3.9	41.8	NA	NA	2	5.55	NA	NA	2	1	1	2	9.7	148	6.55	0.43	0.56	3.22	1.008
109866	16832.92793	17511.77709	2	28	3	25	4.1	46	21	23	10	106	103	0.62	3.1	4.55	10	213	122	283	3.6	3.8	143	0.3	9.1	171	7.2	132	5	31.7	NA	NA	2	NA	NA	NA	2	2	1	2	20.2	398	5.08	NA	NA	NA	NA
109867	52389.90656	57595.40423	1	55	3	10	3.8	71	18	28	15	107	89	0.85	3	4.61	79	18	132	287	2.5	4.4	144	0.3	9.4	181	6.8	156	6	26.9	0	1	1	4.94	2	2	2	1	2	2	10.3	78	13.21	NA	NA	NA	1.903
109868	12381.89198	12473.76041	2	55	1	19	3.6	79	22	26	14	101	43	0.62	4.1	5.61	19	104	142	286	4.1	4.2	143	0.3	9.1	212	7.7	209	4.5	45.7	NA	2	2	6.27	2	2	2	1	2	2	28.4	141	20.14	NA	NA	NA	0.514
109869	24266.53322	26917.57098	1	75	3	NA	NA	NA	NA	NA	NA	NA	NA	NA	NA	NA	NA	NA	NA	NA	NA	NA	NA	NA	NA	NA	NA	NA	NA	28.8	0	1	2	NA	2	2	1	1	2	2	14.8	168	8.81	NA	NA	NA	0.712
109870	5869.152545	6492.233584	1	0	3	NA	NA	NA	NA	NA	NA	NA	NA	NA	NA	NA	NA	NA	NA	NA	NA	NA	NA	NA	NA	NA	NA	NA	NA	NA	NA	NA	NA	NA	NA	NA	NA	NA	NA	NA	NA	NA	NA	NA	NA	NA	NA
109871	5466.32531	0	1	46	5	NA	NA	NA	NA	NA	NA	NA	NA	NA	NA	NA	NA	NA	NA	NA	NA	NA	NA	NA	NA	NA	NA	NA	NA	NA	NA	2	2	NA	NA	NA	2	1	2	1	NA	NA	NA	NA	NA	NA	NA
109872	7406.19383	7810.011614	2	38	4	NA	NA	NA	NA	NA	NA	NA	NA	NA	NA	NA	NA	NA	NA	NA	NA	NA	NA	NA	NA	NA	NA	NA	NA	37.7	NA	NA	2	NA	NA	NA	2	2	2	2	NA	NA	NA	NA	NA	NA	NA
109873	11783.01951	12591.17736	2	18	3	21	4	80	26	24	17	95	102	0.93	3.9	4.66	21	57	205	284	3	4.7	142	0.4	9.6	127	7.9	73	4.7	23.5	NA	NA	2	NA	NA	NA	NA	2	NA	NA	6.1	121	5.04	0.08	0.56	3.53	0.455
109874	24885.10943	24881.94387	1	55	2	36	4.6	79	29	29	19	99	126	1.06	2.7	4.72	73	103	153	286	3.7	4	143	2	9.9	172	7.3	93	4.7	26.4	0	1	2	NA	2	2	2	2	2	2	6.1	131	4.66	0.72	2.79	21.37	1.099
109875	7607.937159	8677.001244	1	0	1	NA	NA	NA	NA	NA	NA	NA	NA	NA	NA	NA	NA	NA	NA	NA	NA	NA	NA	NA	NA	NA	NA	NA	NA	NA	NA	NA	NA	NA	NA	NA	NA	NA	NA	NA	NA	NA	NA	NA	NA	NA	NA
109876	18458.06548	26695.65478	2	80	3	13	3.9	76	17	29	22	102	59	0.79	3.2	5.61	13	56	153	290	3.4	4.3	144	0.4	9.8	195	7.1	175	7.4	32.1	1	1	2	NA	2	2	2	1	2	2	4.8	60	8	0.08	0.56	2.11	0.476
109877	5412.880275	5799.319581	1	41	4	18	4.4	91	31	31	12	101	403	1.21	2.8	4.77	17	115	142	278	3.2	4.6	140	0.5	9.3	136	7.2	86	4	29.2	NA	2	2	NA	NA	NA	2	1	2	2	9.4	228	4.12	0.4	0.56	25.23	1.212
109878	40406.92563	44876.97821	1	19	3	15	4.6	88	19	27	8	102	110	0.83	2.9	5.11	12	107	164	281	3.3	3.9	142	0.6	9.8	98	7.5	92	8.1	20.5	NA	NA	2	5.33	NA	NA	NA	2	NA	NA	4.8	68	7.06	NA	NA	NA	1.443
109879	6012.538308	6460.496597	2	60	2	14	4.4	69	16	25	17	101	67	0.73	3	4.27	24	55	146	280	4.1	3.8	140	0.2	9.9	187	7.4	80	2.8	25.8	1	1	1	NA	2	2	2	2	2	2	5.2	134	3.88	NA	NA	NA	0.742
109880	7581.125009	7457.1583	1	13	1	11	4	341	18	26	16	104	132	0.71	2.5	5.94	10	34	170	287	4.4	4.2	143	0.3	9.1	93	6.5	70	7.2	21.6	NA	NA	2	6.11	NA	NA	NA	NA	NA	NA	9.3	152	6.12	0.45	0.56	6.59	NA
109881	10546.91317	10731.67528	1	48	5	40	3.9	61	23	28	12	103	365	0.83	2.8	6.77	79	67	135	279	4	3.8	139	0.5	9	153	6.7	108	5.5	27.9	NA	2	2	7.27	NA	NA	2	1	2	2	16.6	175	9.49	NA	NA	NA	0.298
109882	7954.562077	8424.029273	2	14	4	11	4.1	68	15	23	7	101	36	0.55	3.6	4.77	18	84	137	275	3.7	4.4	139	0.5	9.3	127	7.7	43	4.3	21.6	NA	NA	2	3.66	NA	NA	NA	NA	NA	NA	8.4	193	4.35	NA	NA	NA	0.426
109883	15190.21254	17196.30686	1	1	2	NA	NA	NA	NA	NA	NA	NA	NA	NA	NA	NA	NA	NA	NA	NA	NA	NA	NA	NA	NA	NA	NA	NA	NA	NA	NA	NA	2	NA	NA	NA	NA	NA	NA	NA	NA	NA	NA	NA	NA	NA	NA
109884	34344.24473	37168.87374	2	45	1	34	4.3	73	30	24	10	100	88	0.66	3.6	4.83	8	108	157	274	3.7	3.8	138	0.2	9.1	205	7.9	120	4.3	25.6	NA	2	2	NA	NA	NA	2	2	2	2	1	29	3.45	0.08	0.56	9.43	3.554
109885	17299.02273	19499.9846	1	9	3	NA	NA	NA	NA	NA	NA	NA	NA	NA	NA	NA	NA	NA	NA	NA	NA	NA	NA	NA	NA	NA	NA	NA	NA	19	NA	NA	2	NA	NA	NA	NA	NA	NA	NA	2.3	39	5.9	NA	NA	NA	NA
109886	16136.26686	17310.68593	1	64	3	14	3.9	83	17	27	14	102	100	0.87	2.9	6.49	54	75	159	288	3.1	4.2	144	0.6	8.9	211	6.8	148	5	50.7	0	1	2	NA	2	1	2	1	2	2	19.3	158	12.22	NA	NA	NA	NA
109887	11894.39969	13129.33838	1	25	5	38	4.4	71	24	23	12	101	143	1.02	3.2	4.94	41	141	128	280	4.3	4	141	0.4	9.7	218	7.6	187	8.5	37.2	NA	NA	2	NA	NA	NA	2	1	2	2	5.7	142	4.01	NA	NA	NA	0.883
109888	4319.380641	4986.146387	1	8	5	NA	NA	NA	NA	NA	NA	NA	NA	NA	NA	NA	NA	NA	NA	NA	NA	NA	NA	NA	NA	NA	NA	NA	NA	22.6	NA	NA	2	NA	NA	NA	NA	NA	NA	NA	14.6	182	8.02	NA	NA	NA	0.603
109889	8939.670188	9958.014555	2	8	5	NA	NA	NA	NA	NA	NA	NA	NA	NA	NA	NA	NA	NA	NA	NA	NA	NA	NA	NA	NA	NA	NA	NA	NA	23.9	NA	NA	2	NA	NA	NA	NA	NA	NA	NA	10.8	36	30	0.08	0.56	1.36	NA
109890	47823.04109	55954.43102	1	4	3	NA	NA	NA	NA	NA	NA	NA	NA	NA	NA	NA	NA	NA	NA	NA	NA	NA	NA	NA	NA	NA	NA	NA	NA	15.3	NA	NA	2	NA	NA	NA	NA	NA	NA	NA	12.1	96	12.6	1.1	1.03	6.17	NA
109891	16937.5486	19296.44925	2	80	3	20	4	72	18	24	13	101	36	0.79	2.5	5.11	14	129	153	277	4.2	4.5	139	0.5	9.1	133	6.5	126	4.9	31.3	NA	2	1	NA	2	2	2	1	2	2	10.6	28	37.86	NA	NA	NA	1.272
109892	23972.67076	0	1	53	3	NA	NA	NA	NA	NA	NA	NA	NA	NA	NA	NA	NA	NA	NA	NA	NA	NA	NA	NA	NA	NA	NA	NA	NA	NA	NA	2	2	NA	2	2	2	2	2	2	NA	NA	NA	NA	NA	NA	NA
109893	12093.92479	12870.25755	2	20	4	11	4.1	67	16	26	8	103	160	0.68	3.5	5.16	18	74	149	281	2.7	4.3	142	0.5	9.3	106	7.6	36	5.4	30.3	NA	NA	2	5.66	NA	NA	2	1	2	2	6.8	116	5.86	0.08	0.56	10.02	1
109894	20558.64911	21634.71151	2	32	1	14	4.1	81	14	25	11	101	109	0.61	2.8	5.16	14	55	170	280	3.1	3.6	141	0.2	9.2	144	6.9	81	5.8	44.9	NA	NA	2	NA	NA	NA	2	1	2	2	6.2	89	6.97	NA	NA	NA	0.899
109895	10857.35012	11425.94855	1	21	1	25	4.1	79	15	22	14	106	162	0.81	3	5.38	33	104	NA	282	4.5	4.3	141	0.3	9.7	249	7.1	654	5.8	43.7	NA	NA	2	NA	NA	NA	2	1	2	2	10.7	192	5.57	NA	NA	NA	1.364
109896	19605.3263	22241.98125	2	1	3	NA	NA	NA	NA	NA	NA	NA	NA	NA	NA	NA	NA	NA	NA	NA	NA	NA	NA	NA	NA	NA	NA	NA	NA	NA	NA	NA	2	NA	NA	NA	NA	NA	NA	NA	NA	NA	NA	NA	NA	NA	NA
109897	4053.830037	4197.738915	1	80	4	11	4.2	72	12	23	17	103	83	0.92	2.7	5.94	11	108	159	283	3.5	4.1	141	0.6	9.2	143	6.9	53	6.2	37.1	1	2	1	NA	2	2	2	1	2	2	73.8	377	19.58	NA	NA	NA	0.224
109898	17408.38394	17238.13208	2	48	2	32	3.8	81	24	23	8	103	153	0.5	3.4	5.55	40	105	143	278	3.3	3.7	140	0.2	8.9	177	7.2	209	5.4	42.8	NA	1	2	NA	NA	NA	2	1	2	2	4.8	28	17.14	NA	NA	NA	NA
109899	3670.384545	0	1	7	4	NA	NA	NA	NA	NA	NA	NA	NA	NA	NA	NA	NA	NA	NA	NA	NA	NA	NA	NA	NA	NA	NA	NA	NA	NA	NA	NA	2	NA	NA	NA	NA	NA	NA	NA	NA	NA	NA	NA	NA	NA	NA
109900	15011.194	17041.32542	2	80	3	9	4	80	28	27	24	95	249	0.66	2.5	5.11	12	71	254	276	3.4	3.2	136	0.4	9.4	173	6.5	112	5.7	20.6	NA	2	2	NA	2	2	2	2	2	2	3.7	23	16.09	NA	NA	NA	0.877
109901	11998.10604	14801.76745	1	80	3	14	3.7	62	25	26	28	97	108	0.89	4	5.55	48	55	167	279	3.5	4	137	1.1	8.9	170	7.7	65	9.5	28.2	0	2	2	NA	2	2	2	2	2	2	NA	NA	NA	NA	NA	NA	NA
109902	7665.329124	8400.22987	2	75	4	23	3.6	129	31	21	24	102	184	1.17	3.4	6.61	71	68	252	288	3.5	4.3	142	0.2	9.2	151	7	113	7.6	42.7	0	2	1	6.88	2	2	2	1	2	2	9.9	83	11.93	0.31	0.56	3.44	0.363
109903	9988.041863	11088.2249	1	53	4	41	4.1	74	31	23	18	106	523	1.11	3.6	5.22	41	96	152	285	3	4.3	142	0.6	9.1	174	7.7	87	6	43.2	1	2	2	5.44	2	2	2	1	1	2	574	224	256.25	1.64	0.56	9.57	0.714
109904	13702.52697	14703.18931	2	1	3	NA	NA	NA	NA	NA	NA	NA	NA	NA	NA	NA	NA	NA	NA	NA	NA	NA	NA	NA	NA	NA	NA	NA	NA	NA	NA	NA	2	NA	NA	NA	NA	NA	NA	NA	NA	NA	NA	NA	NA	NA	NA
109905	30533.58755	33236.47369	2	52	3	56	4.3	71	34	25	23	99	58	1.02	3	6.33	60	109	177	282	3.1	3.2	139	0.4	9.9	139	7.3	140	7.1	48.6	1	2	2	NA	2	2	2	1	2	2	42.6	265	16.08	NA	NA	NA	0.318
109906	4927.08301	5502.206917	1	10	5	NA	NA	NA	NA	NA	NA	NA	NA	NA	NA	NA	NA	NA	NA	NA	NA	NA	NA	NA	NA	NA	NA	NA	NA	16.1	NA	NA	2	NA	NA	NA	NA	NA	NA	NA	6.8	146	4.66	0.08	0.56	5.55	1.836
109907	12964.40806	15854.26881	1	6	4	NA	NA	NA	NA	NA	NA	NA	NA	NA	NA	NA	NA	NA	NA	NA	NA	NA	NA	NA	NA	NA	NA	NA	NA	17.4	NA	NA	2	NA	NA	NA	NA	NA	NA	NA	11.8	139	8.49	NA	NA	NA	0.222
109908	19219.1572	24373.15799	1	80	3	31	4.9	85	43	21	30	98	73	1.34	3.3	5.83	84	105	187	286	3	4.8	140	1.1	9.7	181	8.2	80	5.2	19.7	0	2	2	NA	1	2	1	2	2	2	429.5	252	170.44	NA	NA	NA	NA
109909	9498.657735	0	2	16	4	NA	NA	NA	NA	NA	NA	NA	NA	NA	NA	NA	NA	NA	NA	NA	NA	NA	NA	NA	NA	NA	NA	NA	NA	NA	NA	NA	2	NA	NA	NA	NA	2	NA	NA	NA	NA	NA	NA	NA	NA	NA
109910	7638.472713	8005.313321	1	16	4	6	4.4	170	18	28	5	101	248	0.74	3.9	5.22	18	67	110	275	3.5	4.2	139	0.4	9.7	133	8.3	67	6.4	35.1	NA	NA	2	5.61	NA	NA	NA	1	NA	NA	9.6	188	5.11	NA	NA	NA	0.807
109911	9212.80915	9847.121769	1	13	4	7	3.8	332	17	23	5	104	94	0.63	3.2	4.83	19	42	165	280	5.3	5.1	142	0.3	9.3	112	7	54	5.1	16.4	NA	NA	2	4.61	NA	NA	NA	NA	NA	NA	28.7	265	10.83	NA	NA	NA	NA
109912	13111.59421	0	2	43	3	NA	NA	NA	NA	NA	NA	NA	NA	NA	NA	NA	NA	NA	NA	NA	NA	NA	NA	NA	NA	NA	NA	NA	NA	NA	NA	2	2	NA	NA	NA	2	2	2	2	NA	NA	NA	NA	NA	NA	NA
109913	15202.46664	16412.66085	2	52	4	16	4	71	14	30	21	97	191	0.89	3.2	4.61	39	53	168	289	4.3	3	144	0.2	9.2	214	7.2	228	5.2	42.3	0	2	1	NA	2	2	2	2	2	2	10.4	137	7.59	0.08	0.56	3.43	0.682
109914	3979.174951	4407.538198	2	2	4	NA	NA	NA	NA	NA	NA	NA	NA	NA	NA	NA	NA	NA	NA	NA	NA	NA	NA	NA	NA	NA	NA	NA	NA	14.9	NA	NA	2	NA	NA	NA	NA	NA	NA	NA	NA	NA	NA	NA	NA	NA	NA
109915	16559.16438	16571.91808	1	58	1	16	4.3	80	15	27	15	99	49	1.1	2.8	5.5	15	119	144	280	3.5	4.3	140	0.7	9.5	229	7.1	132	4.3	31.5	0	2	2	NA	2	2	2	2	2	2	1.8	48	3.75	0.08	0.56	1.88	0.449
109916	12311.25066	13260.49046	1	25	4	28	4.3	69	23	26	11	99	654	1.03	3.5	4.66	37	69	143	276	4.2	3.9	139	0.4	9.4	188	7.8	71	5.7	41.6	NA	NA	2	NA	NA	NA	2	2	2	2	5.7	99	5.76	0.08	0.56	4.39	0.548
109917	81968.52403	89347.86127	2	54	3	18	4.1	44	22	28	17	104	117	0.62	2.9	5	12	92	129	282	3.9	4.2	141	0.5	9.2	244	7	44	4.2	22.3	0	2	2	5.5	2	2	1	2	2	2	6.5	89	7.3	NA	NA	NA	0.539
109918	5419.017253	5989.85959	1	66	1	32	4.7	65	22	30	21	98	92	1.44	2.3	5.77	31	141	135	286	3.4	4.8	142	1.1	9.9	224	7	261	8.6	32.3	1	2	2	6.22	2	2	2	1	2	2	6.1	86	7.09	0.08	0.56	18.05	1.228
109919	14354.77052	14700.04456	2	45	1	16	4	74	13	24	16	104	65	0.62	2.8	5.44	18	159	145	286	4.1	4.1	143	0.6	9	218	6.8	89	4.6	25.8	NA	2	2	5.83	NA	NA	2	2	2	2	13.1	118	11.1	NA	NA	NA	0.353
109920	14257.10932	15013.91103	1	6	2	NA	NA	NA	NA	NA	NA	NA	NA	NA	NA	NA	NA	NA	NA	NA	NA	NA	NA	NA	NA	NA	NA	NA	NA	19.6	NA	NA	2	NA	NA	NA	NA	NA	NA	NA	7.2	57	12.63	NA	NA	NA	NA
109921	12110.52006	12616.40113	2	58	5	19	4.1	66	21	26	12	100	66	0.81	2.6	4.61	11	125	166	282	3.7	3.1	142	0.8	8.8	288	6.7	173	6.4	18.4	0	2	2	NA	1	2	2	2	2	2	4.5	83	5.42	NA	NA	NA	0.43
109922	45558.02307	51928.86082	2	42	3	8	4.3	77	13	23	9	103	89	0.65	2.8	3.89	12	114	158	278	3.7	4	141	0.3	9.1	165	7.1	87	3.1	24.7	NA	1	2	NA	NA	NA	2	1	2	2	18.4	211	8.72	NA	NA	NA	0.127
109923	16402.62718	18942.66257	2	5	3	NA	NA	NA	NA	NA	NA	NA	NA	NA	NA	NA	NA	NA	NA	NA	NA	NA	NA	NA	NA	NA	NA	NA	NA	15.6	NA	NA	2	NA	NA	NA	NA	NA	NA	NA	9.4	65	14.46	0.08	0.56	5.35	NA
109924	2130.385421	2269.94175	1	10	4	NA	NA	NA	NA	NA	NA	NA	NA	NA	NA	NA	NA	NA	NA	NA	NA	NA	NA	NA	NA	NA	NA	NA	NA	21.6	NA	NA	2	NA	NA	NA	NA	NA	NA	NA	19.6	309	6.34	NA	NA	NA	0.227
109925	3280.980411	3985.886689	2	8	5	NA	NA	NA	NA	NA	NA	NA	NA	NA	NA	NA	NA	NA	NA	NA	NA	NA	NA	NA	NA	NA	NA	NA	NA	23.3	NA	NA	2	NA	NA	NA	NA	NA	NA	NA	14.9	156	9.55	0.14	0.56	5.51	0.189
109926	15820.54256	16850.75131	2	45	4	13	4	71	19	23	13	103	162	1.01	3.3	4.61	23	74	181	277	4.1	4.5	139	0.6	9.4	258	7.3	78	4.6	31.8	NA	2	2	NA	NA	NA	2	1	2	2	3.6	203	1.77	NA	NA	NA	0.205
109927	7311.924609	7938.715595	2	4	3	NA	NA	NA	NA	NA	NA	NA	NA	NA	NA	NA	NA	NA	NA	NA	NA	NA	NA	NA	NA	NA	NA	NA	NA	20.5	NA	NA	2	NA	NA	NA	NA	NA	NA	NA	7	34	20.59	0.08	0.56	6.24	NA
109928	8793.523174	9090.12497	2	0	1	NA	NA	NA	NA	NA	NA	NA	NA	NA	NA	NA	NA	NA	NA	NA	NA	NA	NA	NA	NA	NA	NA	NA	NA	NA	NA	NA	NA	NA	NA	NA	NA	NA	NA	NA	NA	NA	NA	NA	NA	NA	NA
109929	20650.75608	22484.07595	1	13	4	14	4.4	331	21	26	11	97	256	0.73	3.2	4.66	19	141	137	276	4.6	3.7	139	0.3	10.3	210	7.6	77	5.8	20.3	NA	NA	2	NA	NA	NA	NA	NA	NA	NA	373.5	161	231.99	NA	NA	NA	1.175
109930	12989.21355	14124.50678	1	51	4	21	4	76	18	26	13	102	171	0.89	3.5	6.66	43	75	162	283	2.9	3.9	141	0.4	9.2	184	7.5	92	5.1	45.2	0	2	2	NA	2	2	2	1	2	2	17.8	246	7.24	0.42	0.56	10.79	1.12
109931	22832.6167	24048.22051	2	40	4	9	3.6	122	10	25	6	101	169	0.86	3.6	5.55	4	29	153	275	3.3	3.5	139	0.2	8.9	163	7.2	106	3.6	30.6	NA	2	2	5.94	NA	NA	2	1	2	2	17.4	280	6.21	0.17	0.56	3.78	0.085
109932	68952.03975	74511.37711	1	72	3	14	4.5	65	22	23	19	102	228	0.93	2.6	5.5	26	136	176	278	4	4	138	0.9	9.2	209	7.1	157	6.7	33.5	1	2	2	NA	2	2	2	1	1	2	4.4	94	4.68	NA	NA	NA	1.167
109933	85053.35021	103775.41	2	9	5	NA	NA	NA	NA	NA	NA	NA	NA	NA	NA	NA	NA	NA	NA	NA	NA	NA	NA	NA	NA	NA	NA	NA	NA	15.7	NA	NA	2	NA	NA	NA	NA	NA	NA	NA	6.5	41	15.85	NA	NA	NA	1
109934	8390.909773	9203.238302	2	35	4	13	4.6	69	15	23	6	99	241	0.61	3.5	6	16	126	148	278	2.4	3.5	140	0.3	9.6	150	8.1	59	4.7	22.4	NA	NA	2	NA	NA	NA	2	2	2	2	1.9	20	9.5	NA	NA	NA	NA
109935	9802.699248	10663.42155	2	9	3	NA	NA	NA	NA	NA	NA	NA	NA	NA	NA	NA	NA	NA	NA	NA	NA	NA	NA	NA	NA	NA	NA	NA	NA	15.6	NA	NA	2	NA	NA	NA	NA	NA	NA	NA	4.3	12	35.83	NA	NA	NA	1.652
109936	23698.06501	28215.87996	1	4	1	NA	NA	NA	NA	NA	NA	NA	NA	NA	NA	NA	NA	NA	NA	NA	NA	NA	NA	NA	NA	NA	NA	NA	NA	15.6	NA	NA	2	NA	NA	NA	NA	NA	NA	NA	6.4	28	22.86	0.08	0.56	1.19	NA
109937	14401.41578	15131.86978	1	74	5	16	3.5	47	23	27	25	108	69	1.05	2.5	5.55	18	92	155	295	3.1	4.5	146	1	8.9	125	6	55	5.8	NA	NA	2	1	NA	1	2	2	2	2	1	NA	NA	NA	NA	NA	NA	NA
109938	71862.78705	73776.57572	2	34	2	11	4.4	72	14	25	16	101	240	0.89	2.8	5.05	23	77	134	276	4.5	4	138	0.4	9.8	168	7.2	107	3.2	26.2	NA	NA	2	NA	NA	NA	2	2	2	2	9.4	119	7.9	NA	NA	NA	0.5
109939	14683.64933	15760.39879	2	37	2	10	4.1	92	15	24	9	105	65	0.45	3.4	4.83	10	55	154	281	3.5	4	142	0.2	8.9	153	7.5	47	3.4	23.5	NA	NA	2	5.38	NA	NA	2	2	2	2	1.9	27	7.04	0.35	0.56	7.91	1.77
109940	13441.35766	15015.15354	2	57	2	20	4.2	84	21	27	14	102	92	0.57	3.2	4.88	68	95	133	279	3.3	3.8	140	0.3	9.4	228	7.4	150	4.3	23.1	0	1	2	NA	2	2	2	2	2	2	13.1	126	10.4	0.08	0.56	5.35	0.431
109941	9291.317244	9311.446524	2	57	5	29	3.7	90	26	26	17	98	133	0.59	3.6	8.27	38	81	173	282	3.8	3.9	139	0.3	9	197	7.3	111	7.2	31	NA	2	2	8.88	2	2	2	2	2	2	61.1	94	65	0.08	0.56	411.01	0.5
109942	33007.85751	38822.91396	2	79	3	16	4.4	74	19	31	14	99	89	0.6	2.8	5.33	14	89	164	283	3.6	4.4	142	0.3	9.6	236	7.2	101	3.7	24.1	1	2	2	NA	2	2	1	2	2	2	2.7	16	16.88	NA	NA	NA	2.021
109943	6428.808332	7420.846057	1	9	5	NA	NA	NA	NA	NA	NA	NA	NA	NA	NA	NA	NA	NA	NA	NA	NA	NA	NA	NA	NA	NA	NA	NA	NA	16.8	NA	NA	2	NA	NA	NA	NA	NA	NA	NA	1.9	30	6.33	NA	NA	NA	NA
109944	16454.34825	22932.48487	2	12	3	19	4.1	226	23	22	15	103	60	0.36	3.4	6.27	17	57	215	285	4.7	4.3	142	0.1	9.6	195	7.5	104	4	19.3	NA	NA	2	NA	NA	NA	NA	NA	NA	NA	7.7	97	7.94	0.08	0.56	4.24	0.518
109945	26635.41216	27383.63879	1	32	5	25	4.5	62	28	28	14	101	509	1.07	2.7	4.72	19	209	162	283	3.9	4.5	142	1.3	9.5	225	7.2	146	8.2	24.3	NA	NA	2	5.16	NA	NA	2	2	2	2	2.5	105	2.38	0.08	0.56	3.76	1.871
109946	98904.36095	117103.0728	2	43	3	8	4	34	11	26	12	105	62	0.71	2.7	5.22	9	99	123	283	3.4	4.2	142	0.6	8.9	173	6.7	61	3.6	21.9	NA	2	2	5.5	NA	NA	2	2	2	2	15.1	186	8.12	NA	NA	NA	0.305
109947	3068.16149	3175.646865	1	64	4	NA	NA	NA	NA	NA	NA	NA	NA	NA	NA	NA	NA	NA	NA	NA	NA	NA	NA	NA	NA	NA	NA	NA	NA	28.9	1	1	1	NA	2	1	2	1	1	2	4.6	120	3.83	NA	NA	NA	1.75
109948	3498.672835	3812.81715	2	0	5	NA	NA	NA	NA	NA	NA	NA	NA	NA	NA	NA	NA	NA	NA	NA	NA	NA	NA	NA	NA	NA	NA	NA	NA	NA	NA	NA	NA	NA	NA	NA	NA	NA	NA	NA	NA	NA	NA	NA	NA	NA	NA
109949	14508.53427	0	1	33	4	NA	NA	NA	NA	NA	NA	NA	NA	NA	NA	NA	NA	NA	NA	NA	NA	NA	NA	NA	NA	NA	NA	NA	NA	NA	NA	NA	2	NA	NA	NA	2	2	2	2	NA	NA	NA	NA	NA	NA	NA
109950	9402.131108	0	1	5	4	NA	NA	NA	NA	NA	NA	NA	NA	NA	NA	NA	NA	NA	NA	NA	NA	NA	NA	NA	NA	NA	NA	NA	NA	NA	NA	NA	2	NA	NA	NA	NA	NA	NA	NA	NA	NA	NA	NA	NA	NA	NA
109951	3851.605942	4285.56755	1	9	4	NA	NA	NA	NA	NA	NA	NA	NA	NA	NA	NA	NA	NA	NA	NA	NA	NA	NA	NA	NA	NA	NA	NA	NA	20	NA	NA	2	NA	NA	NA	NA	NA	NA	NA	21.2	227	9.34	0.69	0.56	7.92	NA
109952	34639.16097	0	1	61	3	NA	NA	NA	NA	NA	NA	NA	NA	NA	NA	NA	NA	NA	NA	NA	NA	NA	NA	NA	NA	NA	NA	NA	NA	NA	NA	2	1	NA	2	2	2	1	1	2	NA	NA	NA	NA	NA	NA	NA
109953	13981.90615	0	2	36	5	NA	NA	NA	NA	NA	NA	NA	NA	NA	NA	NA	NA	NA	NA	NA	NA	NA	NA	NA	NA	NA	NA	NA	NA	NA	NA	NA	2	NA	NA	NA	2	1	2	2	NA	NA	NA	NA	NA	NA	NA
109954	7939.838024	8922.01826	1	2	3	NA	NA	NA	NA	NA	NA	NA	NA	NA	NA	NA	NA	NA	NA	NA	NA	NA	NA	NA	NA	NA	NA	NA	NA	18	NA	NA	2	NA	NA	NA	NA	NA	NA	NA	NA	NA	NA	NA	NA	NA	NA
109955	6083.381008	6950.507662	1	0	3	NA	NA	NA	NA	NA	NA	NA	NA	NA	NA	NA	NA	NA	NA	NA	NA	NA	NA	NA	NA	NA	NA	NA	NA	NA	NA	NA	NA	NA	NA	NA	NA	NA	NA	NA	NA	NA	NA	NA	NA	NA	NA
109956	4788.761401	5489.422287	2	1	2	NA	NA	NA	NA	NA	NA	NA	NA	NA	NA	NA	NA	NA	NA	NA	NA	NA	NA	NA	NA	NA	NA	NA	NA	NA	NA	NA	2	NA	NA	NA	NA	NA	NA	NA	NA	NA	NA	NA	NA	NA	NA
109957	12558.18215	13666.72034	2	64	5	19	4.3	63	20	29	15	99	118	0.66	3	5.5	23	60	182	286	4	4.1	143	0.2	9.4	241	7.3	151	4.3	19	1	2	2	NA	2	2	2	2	2	2	13.5	69	19.57	NA	NA	NA	0.267
109958	6530.323581	0	1	6	5	NA	NA	NA	NA	NA	NA	NA	NA	NA	NA	NA	NA	NA	NA	NA	NA	NA	NA	NA	NA	NA	NA	NA	NA	NA	NA	NA	2	NA	NA	NA	NA	NA	NA	NA	NA	NA	NA	NA	NA	NA	NA
109959	12729.447	14164.37623	2	80	4	11	3.6	109	14	26	31	97	70	1.77	3.8	5.16	12	83	177	284	3.2	4.2	139	0.4	9.4	218	7.4	117	8.2	39.4	0	1	2	NA	2	2	2	1	2	1	21.1	20	105.5	0.08	0.56	14.7	0.027
109960	8844.836547	9057.074341	1	59	5	29	4.3	85	24	27	17	98	156	0.72	2.9	9.99	12	76	138	278	4	3.7	136	0.4	9.5	154	7.2	212	5.4	26.4	1	2	1	NA	2	2	2	2	2	2	3.2	78	4.1	NA	NA	NA	0.517
109961	10556.63454	10488.39485	2	50	5	NA	NA	NA	NA	NA	NA	NA	NA	NA	NA	NA	NA	NA	NA	NA	NA	NA	NA	NA	NA	NA	NA	NA	NA	32.8	NA	2	2	NA	2	2	2	1	2	2	8.6	149	5.77	NA	NA	NA	0.299
109962	25773.24732	28282.80445	1	76	3	12	4.3	86	19	26	25	100	120	0.92	3.2	4.61	17	55	152	285	3.3	4	141	0.9	9.2	162	7.5	91	8.3	29.2	1	2	2	NA	2	2	2	1	2	2	8.4	78	10.77	0.08	0.56	6.15	0.748
109963	14610.37475	15253.87353	2	48	4	42	3.6	85	72	24	10	103	94	0.79	3.4	4.61	216	145	202	279	3	4.2	141	0.4	8.8	174	7	163	3.9	24.2	NA	2	2	NA	NA	NA	2	2	2	2	42.2	253	16.68	NA	NA	NA	0.113
109964	25308.78614	27382.04267	2	10	3	NA	NA	NA	NA	NA	NA	NA	NA	NA	NA	NA	NA	NA	NA	NA	NA	NA	NA	NA	NA	NA	NA	NA	NA	18.4	NA	NA	2	NA	NA	NA	NA	NA	NA	NA	67.5	107	63.08	0.25	0.56	4.22	0.262
109965	2782.300161	2964.561827	1	10	4	NA	NA	NA	NA	NA	NA	NA	NA	NA	NA	NA	NA	NA	NA	NA	NA	NA	NA	NA	NA	NA	NA	NA	NA	16	NA	NA	2	NA	NA	NA	NA	NA	NA	NA	9.1	146	6.23	NA	NA	NA	0.075
109966	5300.704799	5619.638793	1	68	2	NA	NA	NA	NA	NA	NA	NA	NA	NA	NA	NA	NA	NA	NA	NA	NA	NA	NA	NA	NA	NA	NA	NA	NA	25.3	1	2	2	6.44	2	2	2	2	1	2	8.3	124	6.69	0.08	0.56	11.52	0.5
109967	12044.98895	14129.90408	1	2	3	NA	NA	NA	NA	NA	NA	NA	NA	NA	NA	NA	NA	NA	NA	NA	NA	NA	NA	NA	NA	NA	NA	NA	NA	14.6	NA	NA	2	NA	NA	NA	NA	NA	NA	NA	NA	NA	NA	NA	NA	NA	NA
109968	19753.61809	20629.79695	1	47	1	34	4.2	112	25	25	14	103	171	0.61	3.1	5.55	19	149	181	291	3.1	4	146	0.6	9.1	208	7.3	128	4.8	30.4	NA	1	2	6.16	NA	NA	2	1	2	2	7.3	167	4.37	NA	NA	NA	0.199
109969	26036.72824	26822.66869	2	48	2	11	3	72	17	18	40	111	106	4.66	3	6.44	18	108	201	296	6.7	5.1	143	0.1	8.8	293	6	287	6	NA	NA	1	1	NA	NA	NA	2	2	2	1	16070	226	7110.62	0.08	0.56	NA	0.203
109970	8323.272314	8943.779646	2	0	4	NA	NA	NA	NA	NA	NA	NA	NA	NA	NA	NA	NA	NA	NA	NA	NA	NA	NA	NA	NA	NA	NA	NA	NA	NA	NA	NA	NA	NA	NA	NA	NA	NA	NA	NA	NA	NA	NA	NA	NA	NA	NA
109971	11902.98932	13094.83952	2	58	4	47	4	96	39	26	12	102	112	0.91	3.9	5.22	36	44	271	283	3.5	3.3	142	0.5	9.2	190	7.9	109	6.6	28.1	0	1	1	NA	2	1	2	2	2	1	3	46	6.52	NA	NA	NA	1.604
109972	15023.75538	16217.25083	2	41	1	NA	NA	NA	NA	NA	NA	NA	NA	NA	NA	NA	NA	NA	NA	NA	NA	NA	NA	NA	NA	NA	NA	NA	NA	31.1	NA	2	2	NA	NA	NA	2	1	2	2	7.5	126	5.95	1	0.56	66.61	0.553
109973	4549.114768	5210.811394	1	6	4	NA	NA	NA	NA	NA	NA	NA	NA	NA	NA	NA	NA	NA	NA	NA	NA	NA	NA	NA	NA	NA	NA	NA	NA	15.7	NA	NA	2	NA	NA	NA	NA	NA	NA	NA	18.5	21	88.1	NA	NA	NA	NA
109974	7037.380216	7872.776233	1	0	1	NA	NA	NA	NA	NA	NA	NA	NA	NA	NA	NA	NA	NA	NA	NA	NA	NA	NA	NA	NA	NA	NA	NA	NA	NA	NA	NA	NA	NA	NA	NA	NA	NA	NA	NA	NA	NA	NA	NA	NA	NA	NA
109975	26297.26947	27817.27985	2	39	4	11	4	55	12	26	15	103	95	0.94	3.3	5.44	12	64	130	284	3.6	4.6	142	0.3	9.2	193	7.3	86	4.3	27.4	NA	NA	2	5.88	NA	NA	2	1	2	2	10.9	127	8.58	NA	NA	NA	1.265
109976	7005.432026	7505.567657	1	58	4	20	4	82	29	26	14	104	301	1.24	3.2	5	18	61	121	283	3	4.2	142	0.4	9.5	105	7.2	47	5.5	26.7	1	2	2	5.5	2	2	2	2	2	2	5.4	207	2.61	NA	NA	NA	0.852
109977	19758.16783	22722.17729	2	53	5	17	3.6	83	19	26	13	103	67	0.61	3.4	4.77	16	73	152	281	3.5	3.9	141	0.3	8.8	221	7	101	4.9	24.7	0	2	2	NA	2	2	2	2	1	2	4.5	63	7.14	0.28	0.56	29.06	NA
109978	19206.47472	20882.725	2	30	5	12	4.4	71	18	24	18	99	239	0.78	3.4	5.05	15	71	140	275	3.2	3.4	137	0.4	9.3	225	7.8	81	3.5	21.7	NA	NA	2	5.33	NA	NA	2	1	2	2	8.7	136	6.4	NA	NA	NA	0.024
109979	16017.82325	16535.24863	2	31	5	13	4	81	13	23	8	103	75	0.56	3.1	4.94	24	89	112	283	3.6	4	143	0.4	8.9	142	7.1	111	3.4	27.1	NA	NA	2	5.44	NA	NA	1	1	2	2	1.7	31	5.48	NA	NA	NA	0.369
109980	13609.54966	13824.13555	1	18	3	25	4.7	95	19	22	15	98	77	0.95	2.8	5.11	19	111	143	282	4.3	3.9	141	1	9.2	143	7.5	60	8.2	24.7	NA	NA	2	NA	NA	NA	NA	2	NA	NA	23.4	213	10.99	NA	NA	NA	0.388
109981	2957.193502	3204.885238	2	68	2	35	4	97	21	26	22	98	117	1.16	3.1	5.38	62	229	171	283	4.1	4.5	140	0.3	9.2	243	7.1	395	8	25.8	0	2	2	5.83	2	2	1	1	2	9	146.9	188	78.14	NA	NA	NA	0.031
109982	16316.00138	16891.79259	2	7	2	NA	NA	NA	NA	NA	NA	NA	NA	NA	NA	NA	NA	NA	NA	NA	NA	NA	NA	NA	NA	NA	NA	NA	NA	18	NA	NA	2	NA	NA	NA	NA	NA	NA	NA	6.6	60	11	NA	NA	NA	NA
109983	32459.68017	35982.61957	1	7	3	NA	NA	NA	NA	NA	NA	NA	NA	NA	NA	NA	NA	NA	NA	NA	NA	NA	NA	NA	NA	NA	NA	NA	NA	15.9	NA	NA	2	NA	NA	NA	NA	NA	NA	NA	5.3	66	8.03	NA	NA	NA	0.669
109984	8167.136983	7909.333474	2	1	3	NA	NA	NA	NA	NA	NA	NA	NA	NA	NA	NA	NA	NA	NA	NA	NA	NA	NA	NA	NA	NA	NA	NA	NA	NA	NA	NA	2	NA	NA	NA	NA	NA	NA	NA	NA	NA	NA	NA	NA	NA	NA
109985	20552.53459	22956.44026	2	9	3	NA	NA	NA	NA	NA	NA	NA	NA	NA	NA	NA	NA	NA	NA	NA	NA	NA	NA	NA	NA	NA	NA	NA	NA	16.7	NA	NA	2	NA	NA	NA	NA	NA	NA	NA	NA	NA	NA	NA	NA	NA	NA
109986	7536.130269	0	1	80	3	NA	NA	NA	NA	NA	NA	NA	NA	NA	NA	NA	NA	NA	NA	NA	NA	NA	NA	NA	NA	NA	NA	NA	NA	NA	NA	1	2	NA	2	2	1	2	2	2	NA	NA	NA	NA	NA	NA	NA
109987	52136.54878	56881.22423	2	59	3	14	3.7	79	26	25	18	108	159	1	2.1	7.16	8	71	174	302	3.9	4	150	0.2	8.4	149	5.8	149	4.9	23.2	0	2	2	NA	2	2	2	2	2	2	NA	NA	NA	NA	NA	NA	NA
109988	16355.39472	18630.63698	2	6	3	NA	NA	NA	NA	NA	NA	NA	NA	NA	NA	NA	NA	NA	NA	NA	NA	NA	NA	NA	NA	NA	NA	NA	NA	15.7	NA	NA	2	NA	NA	NA	NA	NA	NA	NA	11	106	10.38	NA	NA	NA	NA
109989	9423.369432	10374.27145	1	3	5	NA	NA	NA	NA	NA	NA	NA	NA	NA	NA	NA	NA	NA	NA	NA	NA	NA	NA	NA	NA	NA	NA	NA	NA	15.4	NA	NA	2	NA	NA	NA	NA	NA	NA	NA	NA	NA	NA	NA	NA	NA	NA
109990	7086.70958	7334.97475	1	66	4	11	3.7	75	18	26	10	99	207	0.95	4.1	5.05	101	107	138	274	4.4	3.7	138	0.4	9.4	134	7.8	184	5.8	26.4	0	2	1	5.38	2	2	2	2	2	2	4.9	183	2.68	NA	NA	NA	NA
109991	205108.3464	231057.4296	1	50	3	33	4	39	25	30	14	102	225	0.96	2.7	5.5	21	112	158	282	2.7	4.2	141	1.4	8.8	178	6.7	107	7	29.1	0	2	2	6.05	2	2	2	2	2	2	17.2	212	8.11	NA	NA	NA	NA
109992	17021.39595	19124.834	1	55	4	17	3.7	85	25	26	29	103	327	2.4	3.2	4.55	17	84	245	284	2.9	4.2	140	0.2	9.2	196	6.9	192	8.7	28.2	1	1	2	NA	2	2	2	1	2	1	497	212	234.43	0.08	0.56	11.35	1.786
109993	27685.32532	32392.68333	1	1	3	NA	NA	NA	NA	NA	NA	NA	NA	NA	NA	NA	NA	NA	NA	NA	NA	NA	NA	NA	NA	NA	NA	NA	NA	NA	NA	NA	2	NA	NA	NA	NA	NA	NA	NA	NA	NA	NA	NA	NA	NA	NA
109994	74939.24174	79444.07356	2	73	3	NA	NA	NA	NA	NA	NA	NA	NA	NA	NA	NA	NA	NA	NA	NA	NA	NA	NA	NA	NA	NA	NA	NA	NA	35.3	1	2	1	NA	1	2	2	1	2	2	7.5	126	5.95	0.08	0.56	6.42	0.292
109995	5888.856866	0	1	12	4	NA	NA	NA	NA	NA	NA	NA	NA	NA	NA	NA	NA	NA	NA	NA	NA	NA	NA	NA	NA	NA	NA	NA	NA	NA	NA	NA	2	NA	NA	NA	NA	NA	NA	NA	NA	NA	NA	NA	NA	NA	NA
109996	15800.25851	17650.19156	2	4	3	NA	NA	NA	NA	NA	NA	NA	NA	NA	NA	NA	NA	NA	NA	NA	NA	NA	NA	NA	NA	NA	NA	NA	NA	21.8	NA	NA	2	NA	NA	NA	NA	NA	NA	NA	20.2	74	27.3	1.23	0.56	3.77	NA
109997	20065.18138	23088.61288	1	27	5	78	3.9	115	59	25	9	99	89	0.58	3.5	6.66	44	87	163	281	3.6	3.8	141	0.2	9.8	166	7.4	182	5.4	34.1	NA	NA	1	NA	NA	NA	2	1	2	2	27.6	164	16.83	NA	NA	NA	0.433
109998	25104.68303	27035.79328	2	11	3	NA	NA	NA	NA	NA	NA	NA	NA	NA	NA	NA	NA	NA	NA	NA	NA	NA	NA	NA	NA	NA	NA	NA	NA	16.5	NA	NA	2	NA	NA	NA	NA	NA	NA	NA	2.8	19	14.74	NA	NA	NA	1.444
109999	9292.380758	9537.452351	1	47	3	25	4.1	82	18	26	23	96	248	0.74	2.8	12.1	25	91	148	290	3.9	4.4	140	0.7	9.5	136	6.9	197	9.2	55.3	NA	2	1	12.7	NA	NA	2	1	2	2	23	156	14.74	0.08	0.56	13.12	1.037
110000	9305.192481	0	2	12	5	NA	NA	NA	NA	NA	NA	NA	NA	NA	NA	NA	NA	NA	NA	NA	NA	NA	NA	NA	NA	NA	NA	NA	NA	NA	NA	NA	2	NA	NA	NA	NA	NA	NA	NA	NA	NA	NA	NA	NA	NA	NA
110001	12657.70201	14229.34711	2	7	3	NA	NA	NA	NA	NA	NA	NA	NA	NA	NA	NA	NA	NA	NA	NA	NA	NA	NA	NA	NA	NA	NA	NA	NA	17.7	NA	NA	2	NA	NA	NA	NA	NA	NA	NA	9.2	97	9.48	NA	NA	NA	NA
110002	8685.615405	8626.895228	1	16	2	12	4.8	142	15	27	17	97	116	0.67	2.7	5.22	11	85	171	279	4.7	4.5	139	0.5	10.1	133	7.5	92	4.2	18.3	NA	NA	2	NA	NA	NA	NA	2	NA	NA	3.1	30	10.33	0.08	0.88	1.69	0.274
110003	9367.165741	9557.498422	2	16	4	11	4.2	81	17	23	8	102	102	0.77	3.3	4.66	10	131	141	277	3.1	4.7	140	0.6	9.5	178	7.5	40	4.6	18.2	NA	NA	2	NA	NA	NA	NA	2	NA	NA	5.3	92	5.76	0.08	0.56	3.01	NA
110004	41959.0953	45151.22931	2	20	5	10	4.2	51	15	25	9	100	133	0.72	3.6	4.72	23	95	152	275	3.6	4.2	139	0.5	9.4	153	7.8	85	5.8	22.1	NA	NA	2	5.22	NA	NA	2	2	2	2	5.7	129	4.42	NA	NA	NA	0.554
110005	7492.474889	8439.159538	2	45	4	11	3.4	70	12	18	44	104	321	10.6	3.6	7.44	18	73	210	293	4.5	3.6	140	0.6	8.8	118	7	63	7	24.5	NA	2	1	7.99	NA	NA	2	2	2	1	2186	56	3903.57	NA	NA	NA	0.08
110006	23127.55837	26811.18047	2	80	3	14	3.8	42	20	29	17	103	49	0.97	2.2	6.16	13	16	163	285	4.1	4.3	142	0.4	8.8	202	6	143	5.6	25.6	0	2	2	6.55	2	2	2	2	2	2	20.2	141	14.33	NA	NA	NA	0.599
110007	27985.51088	32591.01233	2	63	3	15	4.4	49	19	23	38	101	88	0.76	2.7	6.16	34	60	109	291	3.4	4.3	141	0.1	9.2	157	7.1	454	7.2	40.8	NA	2	1	6.44	2	2	2	1	1	2	27.6	64	43.13	NA	NA	NA	1.224
110008	24215.30796	25867.46787	2	14	2	11	4.3	88	13	26	9	103	40	0.55	2.9	4.44	15	116	128	284	4.2	4.4	144	0.5	9.6	136	7.2	85	5.9	27.2	NA	NA	2	NA	NA	NA	NA	NA	NA	NA	6.3	120	5.25	NA	NA	NA	NA
110009	16863.33278	17573.25395	1	16	5	8	4.8	102	13	25	10	102	131	0.82	2.6	4.66	14	83	134	276	3.7	3.9	139	0.4	9.4	137	7.4	181	5.5	21	NA	NA	2	NA	NA	NA	NA	1	NA	NA	33.4	147	22.72	0.08	0.56	3.56	0.206
110010	93070.25151	101338.4408	2	55	3	15	3.9	89	19	26	12	104	48	0.68	3.1	5.11	6	106	134	284	3.7	4.8	143	0.4	8.9	167	7	106	3	23.8	1	2	2	5.5	2	2	1	2	2	2	0.9	24	3.75	NA	NA	NA	3.169
110011	12632.69012	13379.95581	1	25	1	24	4.5	116	34	22	17	106	354	0.87	3.2	4.83	26	88	NA	293	3.2	4	147	0.5	9.1	150	7.7	355	7.8	28.9	NA	NA	2	NA	NA	NA	2	2	2	2	152	196	77.55	0.16	0.56	8.85	NA
110012	62624.79396	61399.54641	2	56	3	15	4.3	35	28	27	23	100	307	1.07	2.9	5.05	9	105	179	283	3.6	4	140	0.4	9.6	149	7.2	44	4.1	32.4	0	1	2	5.33	2	2	2	1	2	2	5.4	84	6.43	0.08	0.56	1.77	0.762
110013	23848.7195	25684.78752	2	4	3	NA	NA	NA	NA	NA	NA	NA	NA	NA	NA	NA	NA	NA	NA	NA	NA	NA	NA	NA	NA	NA	NA	NA	NA	14.9	NA	NA	2	NA	NA	NA	NA	NA	NA	NA	8	56	14.29	0.08	0.56	3.64	NA
110014	22300.22216	25036.92429	2	11	3	NA	NA	NA	NA	NA	NA	NA	NA	NA	NA	NA	NA	NA	NA	NA	NA	NA	NA	NA	NA	NA	NA	NA	NA	30.8	NA	NA	2	NA	NA	NA	NA	NA	NA	NA	4.2	38	11.05	NA	NA	NA	0.196
110015	16241.83647	16056.12073	2	52	1	31	3.8	97	23	20	14	103	234	0.8	2.8	5.22	24	71	147	276	4.2	4	138	0.2	8.8	173	6.6	121	5.7	31.3	1	2	2	5.55	2	2	2	2	1	2	2.1	43	4.88	0.08	0.56	4.88	0.693
110016	13778.11926	14779.48116	2	29	4	11	3.9	48	15	25	12	102	103	0.76	3.2	4.88	20	90	108	279	3.9	4.3	140	0.7	9	135	7.1	52	2.6	19.7	NA	NA	2	5.22	NA	NA	2	2	2	2	7.6	244	3.11	NA	NA	NA	0.402
110017	6013.254833	6526.230099	1	6	4	NA	NA	NA	NA	NA	NA	NA	NA	NA	NA	NA	NA	NA	NA	NA	NA	NA	NA	NA	NA	NA	NA	NA	NA	16.9	NA	NA	2	NA	NA	NA	NA	NA	NA	NA	4.3	95	4.53	NA	NA	NA	NA
110018	76582.71115	81062.26868	2	20	3	11	4.1	90	18	27	8	103	92	0.84	3.1	4.61	8	41	155	286	3.8	4	145	0.4	9.5	166	7.2	86	4.4	17.2	NA	NA	2	5	NA	NA	2	2	2	2	22.9	364	6.29	NA	NA	NA	NA
110019	3851.654718	4007.780053	1	11	2	NA	NA	NA	NA	NA	NA	NA	NA	NA	NA	NA	NA	NA	NA	NA	NA	NA	NA	NA	NA	NA	NA	NA	NA	29.4	NA	NA	2	NA	NA	NA	NA	NA	NA	NA	1.9	59	3.22	NA	NA	NA	1.73
110020	14944.61531	16067.97458	2	16	1	11	4.3	83	17	26	12	97	101	0.83	3	4.55	10	103	139	275	3.4	4.3	138	0.2	9.7	191	7.3	74	3.6	24.5	NA	NA	2	5.16	NA	NA	NA	2	NA	NA	3.1	65	4.77	NA	NA	NA	1.476
110021	27723.40696	30527.85692	2	25	4	15	3.8	64	20	22	11	104	262	0.83	3.2	4	9	72	99	283	4.4	3.9	143	0.5	9.3	158	7	42	3.5	17.9	NA	NA	2	4.27	NA	NA	2	2	2	2	24.8	265	9.36	NA	NA	NA	0.378
110022	15870.19167	16629.37098	2	16	3	10	4.6	78	15	25	9	103	64	0.68	2.9	4.5	7	109	151	277	3.9	4.3	140	0.5	9.4	150	7.5	56	4	20.4	NA	NA	2	5.16	NA	NA	NA	1	NA	NA	15.5	168	9.23	NA	NA	NA	NA
110023	35692.50071	38999.17616	2	62	3	13	4.3	49	19	27	18	96	96	0.68	2.7	4.88	9	87	155	279	3.8	4.2	139	0.3	9.5	230	7	81	4.8	28.1	0	2	2	NA	2	2	2	2	2	2	8.4	104	8.08	NA	NA	NA	0.756
110024	4883.847511	5414.528816	1	9	2	NA	NA	NA	NA	NA	NA	NA	NA	NA	NA	NA	NA	NA	NA	NA	NA	NA	NA	NA	NA	NA	NA	NA	NA	28.8	NA	NA	2	NA	NA	NA	NA	NA	NA	NA	9.8	194	5.05	0.52	0.9	8.2	NA
110025	4558.096866	5062.095743	1	0	1	NA	NA	NA	NA	NA	NA	NA	NA	NA	NA	NA	NA	NA	NA	NA	NA	NA	NA	NA	NA	NA	NA	NA	NA	NA	NA	NA	NA	NA	NA	NA	NA	NA	NA	NA	NA	NA	NA	NA	NA	NA	NA
110026	4087.294421	4589.427041	1	6	4	NA	NA	NA	NA	NA	NA	NA	NA	NA	NA	NA	NA	NA	NA	NA	NA	NA	NA	NA	NA	NA	NA	NA	NA	15.8	NA	NA	2	NA	NA	NA	NA	NA	NA	NA	13.4	139	9.64	NA	NA	NA	NA
110027	44617.59922	47961.82858	2	22	3	13	3.8	55	15	22	11	103	87	0.95	3.3	4.5	14	41	127	276	4.6	3.7	139	0.1	9.2	187	7.1	134	4.8	24.8	NA	NA	2	4.94	NA	NA	2	2	2	2	15.5	352	4.4	NA	NA	NA	1.739
110028	13004.38033	14497.75548	2	23	2	62	3.9	165	36	27	8	103	57	0.67	3.8	4.44	35	83	122	279	3.9	3.9	141	0.6	9.4	108	7.7	67	3.7	19.2	NA	NA	2	5.05	NA	NA	2	2	2	2	12.1	70	17.29	0.08	0.56	4.52	NA
110029	15810.48176	15885.36642	1	42	1	88	4	53	37	26	14	103	85	0.73	3.2	5.22	55	130	147	283	3.5	4	142	0.5	8.9	159	7.2	168	6.2	31.9	NA	2	2	5.72	NA	NA	2	1	2	2	26.1	233	11.2	NA	NA	NA	0.494
110030	39993.23213	43392.82655	2	27	4	8	4.1	58	17	26	10	103	108	0.68	3.1	4.72	44	135	135	280	3.4	3.9	141	0.7	9	145	7.2	53	3.6	21.3	NA	NA	2	5	NA	NA	2	2	2	2	4.9	54	9.07	NA	NA	NA	NA
110031	25629.77732	28474.99819	2	5	3	NA	NA	NA	NA	NA	NA	NA	NA	NA	NA	NA	NA	NA	NA	NA	NA	NA	NA	NA	NA	NA	NA	NA	NA	17.4	NA	NA	2	NA	NA	NA	NA	NA	NA	NA	6.1	76	8.03	1.14	0.56	5.83	NA
110032	29049.63006	0	2	80	3	NA	NA	NA	NA	NA	NA	NA	NA	NA	NA	NA	NA	NA	NA	NA	NA	NA	NA	NA	NA	NA	NA	NA	NA	NA	NA	2	2	NA	2	2	2	2	2	2	NA	NA	NA	NA	NA	NA	NA
110033	26641.29736	29707.23798	2	61	3	NA	NA	NA	NA	NA	NA	NA	NA	NA	NA	NA	NA	NA	NA	NA	NA	NA	NA	NA	NA	NA	NA	NA	NA	NA	NA	1	2	NA	1	1	2	2	1	2	7.6	23	33.04	0.08	0.56	0.9	1.375
110034	7063.68194	7477.412123	2	35	4	NA	NA	NA	NA	NA	NA	NA	NA	NA	NA	NA	NA	NA	NA	NA	NA	NA	NA	NA	NA	NA	NA	NA	NA	40.6	NA	NA	2	NA	NA	NA	1	1	2	2	9.5	205	4.63	NA	NA	NA	0.387
110035	55279.0842	58809.46009	2	27	3	15	3.5	55	13	25	8	103	61	0.7	3.2	4.44	12	41	152	279	3.1	4	141	0.2	8.7	176	6.7	226	5.2	53.7	NA	NA	2	NA	NA	NA	2	1	2	2	22.4	317	7.07	NA	NA	NA	0.247
110036	18726.56116	20578.67756	2	50	3	NA	NA	NA	NA	NA	NA	NA	NA	NA	NA	NA	NA	NA	NA	NA	NA	NA	NA	NA	NA	NA	NA	NA	NA	29.9	0	1	2	NA	2	2	2	2	2	2	7	62	11.29	NA	NA	NA	1.04
110037	4016.892912	4262.436928	1	69	4	30	3.2	59	25	25	23	102	344	1.3	3	4.83	23	40	197	286	3.5	4.6	142	0.3	9.1	122	6.2	45	7.5	39.2	1	2	2	NA	2	2	2	1	2	2	19.5	221	8.82	0.08	0.56	24.17	0.176
110038	11463.36586	11787.80831	2	58	5	8	3.8	107	17	25	23	105	41	0.71	3.5	5.05	20	66	126	292	4.4	3.9	145	0.3	9.4	206	7.3	201	5.2	25.7	0	2	2	5.27	2	2	1	2	2	2	17.4	67	25.97	1.21	0.56	70.85	1.021
110039	7165.459522	7975.586019	1	0	1	NA	NA	NA	NA	NA	NA	NA	NA	NA	NA	NA	NA	NA	NA	NA	NA	NA	NA	NA	NA	NA	NA	NA	NA	NA	NA	NA	NA	NA	NA	NA	NA	NA	NA	NA	NA	NA	NA	NA	NA	NA	NA
110040	109078.906	128578.1292	1	28	3	12	4.4	32	17	27	17	102	78	1.14	2.6	4.44	25	81	121	285	4.9	4	143	0.5	8.7	128	7	90	6.1	18.8	NA	NA	2	NA	NA	NA	2	2	2	2	2.1	49	4.29	NA	NA	NA	0.8
110041	62781.97417	65870.3895	2	44	5	32	3.3	85	24	23	11	104	47	0.54	3.1	5.55	107	103	170	283	3.4	4	142	0.5	9	245	6.4	569	5	53.2	NA	1	2	NA	NA	NA	2	1	2	2	19.1	277	6.9	NA	NA	NA	0.166
110042	13815.03058	13998.76655	2	62	2	28	4.1	81	21	25	22	101	104	0.73	2.5	5.05	31	80	174	279	3.2	4	138	0.2	9.6	244	6.6	94	3.3	34.8	1	1	2	NA	2	2	2	1	2	2	6.6	81	8.15	NA	NA	NA	NA
110043	5016.193012	5416.565096	1	37	4	17	3.9	90	20	23	13	104	290	1.29	3.5	4.55	12	87	216	282	3.2	4.3	142	0.4	9	180	7.4	53	5.4	28.9	NA	NA	2	4.94	NA	NA	2	2	2	2	17.3	481	3.6	NA	NA	NA	0.148
110044	50209.36174	52374.52363	2	15	3	15	4.1	104	17	25	15	102	88	0.71	2.9	4.83	13	98	161	281	4.6	4.9	141	0.2	9.6	155	7	44	5	21.6	NA	NA	2	NA	NA	NA	NA	NA	NA	NA	6.1	84	7.26	NA	NA	NA	0.294
110045	33056.73261	43928.1281	2	69	3	11	3.4	61	16	21	20	106	47	0.68	2.9	5.33	39	65	133	280	3.4	4.5	139	0.3	8.7	181	6.3	98	7.1	34.7	0	1	2	NA	2	1	2	1	2	1	16.8	107	15.7	NA	NA	NA	NA
110046	6786.160301	7204.086139	1	0	3	NA	NA	NA	NA	NA	NA	NA	NA	NA	NA	NA	NA	NA	NA	NA	NA	NA	NA	NA	NA	NA	NA	NA	NA	NA	NA	NA	NA	NA	NA	NA	NA	NA	NA	NA	NA	NA	NA	NA	NA	NA	NA
110047	11029.66345	12882.53675	2	2	5	NA	NA	NA	NA	NA	NA	NA	NA	NA	NA	NA	NA	NA	NA	NA	NA	NA	NA	NA	NA	NA	NA	NA	NA	16.5	NA	NA	2	NA	NA	NA	NA	NA	NA	NA	NA	NA	NA	NA	NA	NA	NA
110048	3227.860438	3374.604683	2	14	4	NA	NA	NA	NA	NA	NA	NA	NA	NA	NA	NA	NA	NA	NA	NA	NA	NA	NA	NA	NA	NA	NA	NA	NA	18.5	NA	NA	2	NA	NA	NA	NA	NA	NA	NA	60.6	359	16.88	NA	NA	NA	0.121
110049	23808.97951	25684.21082	2	14	4	8	3.7	111	11	26	9	100	123	0.53	3.3	5.38	16	30	147	274	3.8	4.1	138	0.2	9.4	171	7	63	4.4	37.3	NA	NA	2	5.77	NA	NA	NA	NA	NA	NA	18.8	193	9.74	NA	NA	NA	0.37
110050	4622.998202	0	2	71	4	NA	NA	NA	NA	NA	NA	NA	NA	NA	NA	NA	NA	NA	NA	NA	NA	NA	NA	NA	NA	NA	NA	NA	NA	NA	NA	2	1	NA	2	2	2	1	2	2	NA	NA	NA	NA	NA	NA	NA
110051	2180.647275	2360.71495	1	0	4	NA	NA	NA	NA	NA	NA	NA	NA	NA	NA	NA	NA	NA	NA	NA	NA	NA	NA	NA	NA	NA	NA	NA	NA	NA	NA	NA	NA	NA	NA	NA	NA	NA	NA	NA	NA	NA	NA	NA	NA	NA	NA
110052	41355.60671	45366.68048	1	42	1	20	4.3	62	18	24	24	105	196	0.68	3	5.61	39	96	186	291	2.7	5	144	0.3	8.9	172	7.3	85	5	30.9	NA	2	2	5.83	NA	NA	2	1	2	2	9.2	124	7.42	0.08	0.56	86.31	1.631
110053	5927.57749	6609.0943	1	2	4	NA	NA	NA	NA	NA	NA	NA	NA	NA	NA	NA	NA	NA	NA	NA	NA	NA	NA	NA	NA	NA	NA	NA	NA	16.9	NA	NA	2	NA	NA	NA	NA	NA	NA	NA	NA	NA	NA	NA	NA	NA	NA
110054	25764.38177	27879.9045	1	44	2	30	3.9	95	20	25	17	102	304	0.77	2.8	5.88	46	137	206	285	2.9	4.1	142	0.4	8.8	222	6.7	272	6.1	29.4	NA	1	2	6.27	NA	NA	2	2	2	2	3.2	106	3.02	NA	NA	NA	1.156
110055	7748.207307	8045.77719	1	70	2	19	4.3	51	19	26	15	101	164	1	3	5.33	23	84	156	278	4.3	4.2	139	0.5	9.4	201	7.3	75	7	29.2	1	2	2	NA	2	2	2	1	1	2	4	120	3.33	NA	NA	NA	0.463
110056	38817.26057	41705.76251	1	63	3	15	3.9	70	15	22	15	106	99	0.88	2.5	5.33	23	45	131	282	3.9	4.3	141	0.4	8.7	151	6.4	50	4.5	28.5	0	2	2	5.66	2	2	2	1	2	2	8	197	4.06	0.66	0.56	7.2	1.024
110057	3140.356692	3234.148553	1	69	4	66	3.9	63	27	26	18	100	109	1.22	3.1	10.88	52	83	286	283	3.9	4.1	138	0.5	9.4	142	7	113	4.9	38.4	1	2	1	11.1	2	1	2	2	2	2	9.3	200	4.65	NA	NA	NA	0.664
110058	17698.13388	19985.79306	2	5	4	NA	NA	NA	NA	NA	NA	NA	NA	NA	NA	NA	NA	NA	NA	NA	NA	NA	NA	NA	NA	NA	NA	NA	NA	14.3	NA	NA	2	NA	NA	NA	NA	NA	NA	NA	NA	NA	NA	NA	NA	NA	NA
110059	74575.02687	80818.72711	1	38	3	25	4.3	55	27	26	22	100	289	1.15	2.8	5.44	20	87	150	279	3.4	4.6	138	0.5	9.6	201	7.1	60	6.3	25.5	NA	NA	2	5.61	NA	NA	2	2	2	2	5.4	132	4.09	NA	NA	NA	1.073
110060	7465.206358	0	2	50	4	NA	NA	NA	NA	NA	NA	NA	NA	NA	NA	NA	NA	NA	NA	NA	NA	NA	NA	NA	NA	NA	NA	NA	NA	NA	NA	1	2	NA	2	2	2	2	2	2	NA	NA	NA	NA	NA	NA	NA
110061	15683.01586	17360.73724	1	61	2	43	4.6	87	31	20	12	94	90	0.77	3.2	6	329	109	91	272	3.3	4.1	136	0.4	9.9	282	7.8	181	8	29.4	0	1	2	NA	2	2	2	1	2	2	19.6	266	7.37	NA	NA	NA	0.356
110062	17853.60948	18052.6811	2	40	4	11	4.1	71	14	22	16	104	30	0.56	3.2	4.39	15	91	104	276	4	4	138	0.4	9.1	156	7.3	47	2	25.8	NA	2	2	NA	NA	NA	2	1	2	1	10	95	10.53	NA	NA	NA	0.457
110063	3886.245638	4204.73603	2	18	4	7	4	90	12	25	9	98	118	0.85	3.2	5.05	15	76	139	274	3.7	4.3	138	0.6	9.1	107	7.2	38	4	27.1	NA	NA	2	5.38	NA	NA	NA	2	NA	NA	1.9	38	5	0.08	0.56	0.96	0.379
110064	120025.2223	141124.5408	1	65	3	50	4.1	69	50	25	18	101	93	0.9	3.9	10.38	47	99	155	288	3.3	3.9	141	0.7	9.1	205	8	276	4.5	23.6	1	1	1	11.1	2	2	2	2	2	2	8.9	130	6.85	NA	NA	NA	0.716
110065	18336.10918	17585.77345	1	60	3	17	4.7	57	24	26	18	102	360	1.11	2.4	4.77	13	72	198	284	3.2	4.1	142	0.9	10.2	189	7.1	82	6.9	26.8	0	2	2	NA	2	2	2	2	2	2	12.3	177	6.95	0.3	0.56	22.04	0.167
110066	90757.71842	109116.8799	1	14	3	14	4.2	237	16	26	9	99	72	0.76	3	5.72	9	84	109	276	4.8	4.2	139	0.5	9.2	124	7.2	95	7.7	24.3	NA	NA	2	NA	NA	NA	NA	NA	NA	NA	4	110	3.64	1.34	1.09	6.43	0.421
110067	26840.23075	31551.46718	1	25	3	15	4.2	85	19	30	14	102	60	0.74	2.8	4.77	8	82	127	290	3.5	4.1	146	2.1	9.2	156	7	87	5.1	22.8	NA	NA	2	NA	NA	NA	2	2	2	2	5.2	93	5.59	NA	NA	NA	1.329
110068	129020.0851	153702.7728	2	77	3	11	3.9	42	15	25	22	102	59	0.78	3.1	5.94	14	110	195	285	3.8	4	141	0.5	9	263	7	73	3.8	23.3	NA	2	2	6.55	1	2	2	2	1	2	15.6	160	9.75	NA	NA	NA	0.26
110069	8585.282299	9061.083919	2	10	4	NA	NA	NA	NA	NA	NA	NA	NA	NA	NA	NA	NA	NA	NA	NA	NA	NA	NA	NA	NA	NA	NA	NA	NA	22.3	NA	NA	2	NA	NA	NA	NA	NA	NA	NA	20	111	18.02	0.64	0.56	7.17	5.7
110070	20105.30969	21205.535	2	41	3	18	4.1	68	18	25	15	104	79	1.04	3	6	21	118	138	290	3.1	4.5	145	0.5	9.4	140	7.1	161	4.4	40.2	NA	2	1	6.33	NA	NA	2	1	1	2	10.9	254	4.29	NA	NA	NA	0.702
110071	10314.25853	11534.72535	1	59	4	27	3.6	60	22	29	22	103	582	1.43	3	5	28	87	161	284	2.9	4.4	141	0.4	9.3	141	6.6	61	6.1	26.2	NA	2	2	5.38	2	2	2	2	2	2	8.2	190	4.32	0.08	0.56	17.62	0.514
110072	5761.359305	6101.386722	2	15	4	17	3.7	123	38	22	9	103	1451	0.79	3.3	4.61	13	69	180	275	4.1	3.9	139	0.4	9.5	209	7	131	5.4	36.5	NA	NA	2	NA	NA	NA	NA	NA	NA	NA	68	328	20.73	NA	NA	NA	0.279
110073	24879.60804	0	2	45	5	NA	NA	NA	NA	NA	NA	NA	NA	NA	NA	NA	NA	NA	NA	NA	NA	NA	NA	NA	NA	NA	NA	NA	NA	NA	NA	2	2	NA	NA	NA	2	1	2	2	NA	NA	NA	NA	NA	NA	NA
110074	40054.3671	39307.21213	1	41	1	25	4.6	55	19	25	13	102	214	0.93	2.3	5.05	48	78	158	279	4.1	3.7	140	0.6	9.3	200	6.9	194	5.1	29.1	NA	2	2	NA	NA	NA	2	2	2	2	4.3	95	4.53	NA	NA	NA	2.116
110075	4386.846162	4866.407061	1	2	3	NA	NA	NA	NA	NA	NA	NA	NA	NA	NA	NA	NA	NA	NA	NA	NA	NA	NA	NA	NA	NA	NA	NA	NA	17.4	NA	NA	2	NA	NA	NA	NA	NA	NA	NA	NA	NA	NA	NA	NA	NA	NA
110076	14989.7451	0	1	28	2	NA	NA	NA	NA	NA	NA	NA	NA	NA	NA	NA	NA	NA	NA	NA	NA	NA	NA	NA	NA	NA	NA	NA	NA	NA	NA	NA	2	NA	NA	NA	2	2	2	2	NA	NA	NA	NA	NA	NA	NA
110077	4018.032782	4049.923985	2	6	5	NA	NA	NA	NA	NA	NA	NA	NA	NA	NA	NA	NA	NA	NA	NA	NA	NA	NA	NA	NA	NA	NA	NA	NA	17.3	NA	NA	2	NA	NA	NA	NA	NA	NA	NA	30.4	258	11.78	0.65	0.56	8.92	0.151
110078	13062.81254	13879.75251	1	9	1	NA	NA	NA	NA	NA	NA	NA	NA	NA	NA	NA	NA	NA	NA	NA	NA	NA	NA	NA	NA	NA	NA	NA	NA	18.8	NA	NA	2	NA	NA	NA	NA	NA	NA	NA	NA	NA	NA	NA	NA	NA	NA
110079	6465.932645	6858.205707	2	54	4	12	4.2	115	12	25	9	100	95	0.76	3.3	4.61	22	84	148	274	3.7	3.5	138	0.4	9.5	191	7.5	109	4	37.2	0	1	2	NA	2	9	2	1	2	2	10.6	65	16.31	NA	NA	NA	1.194
110080	40045.38178	0	1	9	3	NA	NA	NA	NA	NA	NA	NA	NA	NA	NA	NA	NA	NA	NA	NA	NA	NA	NA	NA	NA	NA	NA	NA	NA	NA	NA	NA	2	NA	NA	NA	NA	NA	NA	NA	NA	NA	NA	NA	NA	NA	NA
110081	4657.502677	4890.413259	1	65	4	NA	NA	NA	NA	NA	NA	NA	NA	NA	NA	NA	NA	NA	NA	NA	NA	NA	NA	NA	NA	NA	NA	NA	NA	50	NA	1	1	NA	2	2	1	1	2	2	25.3	210	12.05	0.68	0.56	5.11	0.429
110082	20061.38675	22514.94717	2	78	3	9	3.3	108	16	22	12	97	53	0.64	3.2	6.49	21	53	146	275	4.3	3.6	137	0.2	9.1	221	6.5	296	3.9	23	NA	2	2	NA	1	2	2	2	2	2	1.2	15	8	NA	NA	NA	NA
110083	11128.80224	12362.00809	2	21	4	NA	NA	NA	NA	NA	NA	NA	NA	NA	NA	NA	NA	NA	NA	NA	NA	NA	NA	NA	NA	NA	NA	NA	NA	25.2	NA	NA	2	NA	NA	NA	2	2	2	2	125.3	326	38.44	NA	NA	NA	NA
110084	16001.89648	18115.18578	1	2	2	NA	NA	NA	NA	NA	NA	NA	NA	NA	NA	NA	NA	NA	NA	NA	NA	NA	NA	NA	NA	NA	NA	NA	NA	18.4	NA	NA	2	NA	NA	NA	NA	NA	NA	NA	NA	NA	NA	NA	NA	NA	NA
110085	9705.455373	10905.20264	1	60	2	20	4.2	77	22	23	17	100	285	0.92	3.6	5.94	11	34	167	281	3.3	3.8	140	0.3	8.9	222	7.8	128	7.4	29.8	1	2	2	6.44	2	2	2	2	2	2	7.1	112	6.34	NA	NA	NA	1.089
110086	16023.91477	17730.14383	1	7	4	NA	NA	NA	NA	NA	NA	NA	NA	NA	NA	NA	NA	NA	NA	NA	NA	NA	NA	NA	NA	NA	NA	NA	NA	16.6	NA	NA	2	NA	NA	NA	NA	NA	NA	NA	6.4	129	4.96	NA	NA	NA	0.28
110087	9257.172252	10167.67112	1	62	2	17	4	128	17	27	23	104	168	0.92	2.9	6.27	21	58	185	288	4.1	3.8	142	0.5	9.2	152	6.9	122	6.2	24.6	NA	1	2	NA	2	9	2	2	1	2	31.1	281	11.07	0.54	0.56	5.28	NA
110088	38434.58483	43322.31408	1	30	2	49	3.9	86	29	23	14	101	607	0.84	3	5.27	28	83	171	276	4.6	3.9	138	0.4	8.9	209	6.9	405	8.2	44.6	NA	NA	2	NA	NA	NA	2	1	2	2	3	137	2.19	NA	NA	NA	0.966
110089	51559.40398	0	1	38	3	NA	NA	NA	NA	NA	NA	NA	NA	NA	NA	NA	NA	NA	NA	NA	NA	NA	NA	NA	NA	NA	NA	NA	NA	NA	NA	NA	2	NA	NA	NA	2	2	2	2	NA	NA	NA	NA	NA	NA	NA
110090	28434.95684	31670.06514	1	56	2	17	3.5	97	18	25	11	105	101	1.19	2.8	7.22	30	69	133	288	2.4	3.3	144	0.3	8.5	184	6.3	230	8	34.7	0	2	2	NA	2	2	2	1	2	2	30.6	301	10.17	NA	NA	NA	NA
110091	21576.99092	22630.42012	2	39	1	12	4.4	95	13	25	11	100	72	0.65	3.1	4.55	12	82	133	276	4.1	4	139	0.3	9.3	168	7.5	106	5.1	29.3	NA	NA	2	NA	NA	NA	2	1	2	2	17.6	154	11.43	NA	NA	NA	0.617
110092	12058.71545	13899.5415	1	80	3	NA	NA	NA	NA	NA	NA	NA	NA	NA	NA	NA	NA	NA	NA	NA	NA	NA	NA	NA	NA	NA	NA	NA	NA	NA	NA	2	2	NA	2	2	2	2	2	2	NA	NA	NA	NA	NA	NA	NA
110093	19447.07168	20786.554	2	30	4	12	4.4	46	12	21	14	100	63	0.71	2.9	4.88	11	50	97	270	4.1	3.5	135	0.4	9.3	162	7.3	116	5.6	19.9	NA	NA	2	NA	NA	NA	2	2	2	2	17.3	109	15.87	NA	NA	NA	0.677
110094	7014.131464	7337.043806	2	0	1	NA	NA	NA	NA	NA	NA	NA	NA	NA	NA	NA	NA	NA	NA	NA	NA	NA	NA	NA	NA	NA	NA	NA	NA	NA	NA	NA	NA	NA	NA	NA	NA	NA	NA	NA	NA	NA	NA	NA	NA	NA	NA
110095	5675.278365	6066.027878	1	14	4	11	4.3	373	25	24	9	101	168	0.59	3.1	5.05	16	72	235	276	5.8	4.4	139	0.2	9.9	190	7.4	156	4.2	18.1	NA	NA	2	5.55	NA	NA	NA	NA	NA	NA	6.7	144	4.65	NA	NA	NA	0.045
110096	5954.965872	6163.583228	1	66	4	NA	NA	NA	NA	NA	NA	NA	NA	NA	NA	NA	NA	NA	NA	NA	NA	NA	NA	NA	NA	NA	NA	NA	NA	22.1	0	2	2	NA	2	2	2	2	2	2	1.5	84	1.79	0.08	0.56	9.55	0.636
110097	16861.29608	18587.84919	2	9	5	NA	NA	NA	NA	NA	NA	NA	NA	NA	NA	NA	NA	NA	NA	NA	NA	NA	NA	NA	NA	NA	NA	NA	NA	22.9	NA	NA	2	NA	NA	NA	NA	NA	NA	NA	5	38	13.16	0.08	0.56	1.91	NA
110098	23111.64417	26061.50549	1	21	1	20	4.8	97	22	27	7	99	72	0.58	3	5.11	26	112	147	277	3.8	4	140	0.7	9.6	162	7.8	79	4.5	30.6	NA	NA	2	NA	NA	NA	2	1	2	2	2.2	40	5.5	NA	NA	NA	NA
110099	17559.40286	18894.09849	2	11	4	NA	NA	NA	NA	NA	NA	NA	NA	NA	NA	NA	NA	NA	NA	NA	NA	NA	NA	NA	NA	NA	NA	NA	NA	30.9	NA	NA	2	NA	NA	NA	NA	NA	NA	NA	42.6	107	39.81	0.08	0.56	1.91	0.7
110100	23242.72366	0	2	80	3	NA	NA	NA	NA	NA	NA	NA	NA	NA	NA	NA	NA	NA	NA	NA	NA	NA	NA	NA	NA	NA	NA	NA	NA	NA	NA	1	1	NA	2	2	1	1	2	1	NA	NA	NA	NA	NA	NA	NA
110101	13993.06115	14943.08808	1	14	4	7	4.6	274	18	26	8	102	220	0.79	3.1	4.77	13	145	156	281	4.4	4.6	142	0.3	9.7	151	7.7	84	5.1	21.1	NA	NA	2	NA	NA	NA	NA	NA	NA	NA	7.4	218	3.39	0.77	0.56	8.75	0.278
110102	38304.01991	42721.43271	2	45	1	55	3.6	77	36	24	12	104	35	0.54	3.9	6.99	20	45	148	277	3.5	4.1	138	0.2	8.8	193	7.5	217	3.4	35.6	NA	2	2	7.44	NA	NA	2	1	2	2	49.7	199	24.97	NA	NA	NA	0.351
110103	35452.72524	43567.62939	1	80	3	14	4	60	35	24	21	102	87	1.16	2.2	6.16	11	77	250	281	4	4.6	139	0.3	9.1	143	6.2	98	5.8	23	NA	1	2	NA	2	2	1	2	2	2	9.1	90	10.11	0.58	0.56	4.42	NA
110104	15248.66136	16260.25781	2	13	3	NA	NA	NA	NA	NA	NA	NA	NA	NA	NA	NA	NA	NA	NA	NA	NA	NA	NA	NA	NA	NA	NA	NA	NA	15.1	NA	NA	2	NA	NA	NA	NA	NA	NA	NA	31.9	192	16.61	0.14	0.56	9.14	0.405
110105	16067.63487	17354.4483	2	25	4	13	3.7	55	18	24	11	103	156	0.94	3.3	3.83	19	113	146	277	3.4	4.2	140	0.7	8.8	147	7	45	4.1	21.4	NA	NA	2	4.11	NA	NA	2	2	2	2	3.7	138	2.68	NA	NA	NA	0.841
110106	10053.26905	10949.04874	1	7	5	NA	NA	NA	NA	NA	NA	NA	NA	NA	NA	NA	NA	NA	NA	NA	NA	NA	NA	NA	NA	NA	NA	NA	NA	24.8	NA	NA	2	NA	NA	NA	NA	NA	NA	NA	8.2	110	7.45	NA	NA	NA	0.223
110107	21572.35754	23892.02406	2	72	4	13	3.6	88	13	23	12	107	106	0.78	2.7	5	19	85	154	281	3.9	3.7	141	0.5	9.1	170	6.3	119	5.8	30.9	1	1	2	5.27	1	2	2	2	2	2	6.2	120	5.17	NA	NA	NA	0.145
110108	8455.009744	9497.657035	2	4	2	NA	NA	NA	NA	NA	NA	NA	NA	NA	NA	NA	NA	NA	NA	NA	NA	NA	NA	NA	NA	NA	NA	NA	NA	14.9	NA	NA	2	NA	NA	NA	NA	NA	NA	NA	NA	NA	NA	NA	NA	NA	NA
110109	9721.342386	10245.29083	2	17	3	14	4	51	18	23	9	105	182	0.74	3	4.77	4	42	135	281	4.1	4.2	142	0.2	9.3	190	7	118	4.8	22.9	NA	NA	2	5.27	NA	NA	NA	2	NA	NA	11.1	301	3.69	NA	NA	NA	0.169
110110	18246.31189	0	2	3	4	NA	NA	NA	NA	NA	NA	NA	NA	NA	NA	NA	NA	NA	NA	NA	NA	NA	NA	NA	NA	NA	NA	NA	NA	NA	NA	NA	2	NA	NA	NA	NA	NA	NA	NA	NA	NA	NA	NA	NA	NA	NA
110111	10492.28849	10832.47596	2	11	4	NA	NA	NA	NA	NA	NA	NA	NA	NA	NA	NA	NA	NA	NA	NA	NA	NA	NA	NA	NA	NA	NA	NA	NA	19.1	NA	NA	2	NA	NA	NA	NA	NA	NA	NA	47.6	81	58.77	0.08	0.56	8.19	1.085
110112	18014.33273	19343.26251	2	36	5	21	4	73	17	24	16	100	89	0.68	2.8	4.27	19	39	142	279	3.9	4	140	0.1	8.9	165	6.8	242	5.2	28.6	NA	NA	2	NA	NA	NA	2	1	2	2	2.4	26	9.23	NA	NA	NA	0.44
110113	9248.023542	10253.63723	1	9	5	NA	NA	NA	NA	NA	NA	NA	NA	NA	NA	NA	NA	NA	NA	NA	NA	NA	NA	NA	NA	NA	NA	NA	NA	21.6	NA	NA	2	NA	NA	NA	NA	NA	NA	NA	5.2	115	4.52	NA	NA	NA	NA
110114	47365.92877	47421.36862	2	44	3	10	4	50	11	23	10	105	86	0.84	2.7	4.5	8	43	141	277	5	4.1	140	0.1	9.3	184	6.7	152	4.7	27	NA	2	2	NA	NA	NA	2	1	2	2	0.6	15	4	0.08	0.56	1.03	3
110115	13957.00176	14976.24777	2	4	3	NA	NA	NA	NA	NA	NA	NA	NA	NA	NA	NA	NA	NA	NA	NA	NA	NA	NA	NA	NA	NA	NA	NA	NA	16.8	NA	NA	2	NA	NA	NA	NA	NA	NA	NA	17.9	18	99.44	0.08	0.56	0.64	NA
110116	40145.23149	40740.93024	2	35	3	14	4.4	81	14	24	12	104	162	0.68	2.9	5	24	69	156	281	3.2	4	141	0.3	9.7	179	7.3	94	4	31.7	NA	NA	2	NA	NA	NA	2	1	2	2	1	13	7.69	0.08	0.56	0.45	3.291
110117	13217.56874	13929.35112	1	24	4	11	4.4	67	18	26	10	98	185	0.82	2.8	4.39	15	98	157	274	4.3	3.9	138	0.2	9.7	238	7.2	149	5.2	19.6	NA	NA	2	NA	NA	NA	2	2	2	2	0.8	19	4.21	0.08	0.56	0.29	NA
110118	86045.57168	92005.41106	1	37	3	11	4	68	15	25	7	101	144	0.91	2.7	4.94	18	74	127	277	3.3	3.9	140	0.4	9.1	155	6.7	84	4.6	21.8	NA	NA	2	NA	NA	NA	1	2	2	2	1.6	48	3.33	NA	NA	NA	NA
110119	10477.41467	0	1	14	5	NA	NA	NA	NA	NA	NA	NA	NA	NA	NA	NA	NA	NA	NA	NA	NA	NA	NA	NA	NA	NA	NA	NA	NA	NA	NA	NA	2	NA	NA	NA	NA	NA	NA	NA	NA	NA	NA	NA	NA	NA	NA
110120	55278.29785	56409.714	2	34	3	58	3.7	71	35	23	15	102	92	0.8	4.1	6.11	26	67	148	279	3.4	4.2	139	0.4	9.4	168	7.8	178	6	37.8	NA	NA	2	6.49	NA	NA	9	1	2	2	32.8	255	12.86	0.08	0.56	4.7	0.339
110121	19249.91672	19284.34011	2	33	3	NA	NA	NA	NA	NA	NA	NA	NA	NA	NA	NA	NA	NA	NA	NA	NA	NA	NA	NA	NA	NA	NA	NA	NA	29.1	NA	NA	2	NA	NA	NA	2	2	2	2	NA	NA	NA	NA	NA	NA	NA
110122	6756.342257	0	2	13	4	NA	NA	NA	NA	NA	NA	NA	NA	NA	NA	NA	NA	NA	NA	NA	NA	NA	NA	NA	NA	NA	NA	NA	NA	NA	NA	NA	2	NA	NA	NA	NA	NA	NA	NA	NA	NA	NA	NA	NA	NA	NA
110123	69195.93791	74030.31716	2	28	3	41	3.9	84	21	27	14	99	55	0.66	2.8	7.6	64	84	179	282	3.8	4	140	0.3	8.9	216	6.7	185	4.9	43.3	NA	NA	2	NA	NA	NA	2	1	2	2	17.3	104	16.63	0.08	0.96	5.18	1.02
110124	7742.700397	7824.545795	2	55	2	NA	NA	NA	NA	NA	NA	NA	NA	NA	NA	NA	NA	NA	NA	NA	NA	NA	NA	NA	NA	NA	NA	NA	NA	39.1	0	1	1	5.5	2	2	2	1	2	2	5.1	90	5.67	NA	NA	NA	0.157
110125	14482.85015	15168.25951	2	60	5	20	4	99	18	28	22	101	127	0.95	2.4	4.55	15	95	186	286	4.7	3.8	142	0.8	9.5	223	6.4	260	5.1	32.5	1	1	2	NA	2	2	2	1	2	2	8.5	185	4.59	0.18	0.56	4.61	NA
110126	3910.491298	0	2	1	4	NA	NA	NA	NA	NA	NA	NA	NA	NA	NA	NA	NA	NA	NA	NA	NA	NA	NA	NA	NA	NA	NA	NA	NA	NA	NA	NA	2	NA	NA	NA	NA	NA	NA	NA	NA	NA	NA	NA	NA	NA	NA
110127	28884.31625	28942.99109	2	48	2	20	4.3	45	22	27	7	100	208	0.63	2.9	5	24	72	179	279	4	3.7	141	1	8.6	181	7.2	102	4.8	27.3	NA	2	2	NA	NA	NA	2	2	2	2	7.3	110	6.64	0.64	0.56	158.23	0.553
110128	23293.21935	25546.86052	1	48	3	80	4.1	83	60	26	16	100	74	1.11	4.1	5.55	36	250	156	283	4.3	4.4	141	0.4	9	134	8.2	53	6.1	31.7	NA	2	1	6.11	NA	NA	2	1	2	2	13.5	208	6.49	0.08	0.56	10.56	0.52
110129	8313.818675	8782.95256	1	52	4	26	3.4	57	21	23	12	104	101	1.19	3.1	8.94	19	99	110	286	3.4	3.7	142	0.3	8.9	175	6.5	250	6	42.7	0	2	2	NA	2	2	2	1	2	2	120.5	228	52.85	0.08	0.56	33.75	0.676
110130	36467.02843	39176.62041	2	54	3	15	4.5	58	14	26	12	103	115	0.69	2.8	4.5	13	79	150	286	3.4	3.5	144	0.3	9.3	184	7.3	88	3.6	27.7	0	2	2	NA	2	2	2	2	2	2	28.8	63	45.71	0.08	0.56	2.78	0.942
110131	11684.66808	12587.4955	1	69	4	11	4.1	82	16	25	12	102	302	1.24	2.5	4.94	12	37	126	280	3.3	3.8	141	0.3	8.9	120	6.6	49	5.8	19.1	1	2	2	NA	2	2	2	2	2	2	3.4	59	5.76	NA	NA	NA	NA
110132	4370.878204	5339.651096	2	10	5	NA	NA	NA	NA	NA	NA	NA	NA	NA	NA	NA	NA	NA	NA	NA	NA	NA	NA	NA	NA	NA	NA	NA	NA	17.3	NA	NA	2	NA	NA	NA	NA	NA	NA	NA	2.5	19	13.16	NA	NA	NA	NA
110133	23296.32109	25353.60434	1	13	1	41	4.5	211	40	24	12	96	83	0.42	3.2	5.05	25	85	184	269	4.9	4.1	135	0.2	10	190	7.7	81	3.7	21.1	NA	NA	2	5.44	NA	NA	NA	NA	NA	NA	8.1	94	8.62	NA	NA	NA	0.6
110134	25264.58052	27211.58965	1	49	3	50	3.9	173	41	28	18	102	146	0.55	2.6	5.38	650	86	142	289	3.3	4.2	144	0.3	9.9	268	6.5	283	7.7	25.4	NA	1	2	NA	NA	NA	2	2	2	2	20.4	259	7.88	NA	NA	NA	NA
110135	73663.65467	76954.47247	1	40	5	18	4.3	54	18	24	17	100	125	0.65	2.8	5.83	25	108	155	281	3.3	4.4	140	0.2	9.6	213	7.1	209	3.6	27.8	NA	1	2	NA	NA	NA	2	2	2	2	3.7	57	6.49	0.23	0.56	10.87	0.795
110136	24207.79983	26552.55643	1	38	3	22	4.3	70	21	28	11	101	55	1.19	2.7	5.33	34	129	148	281	4.2	4.3	141	0.3	9.8	172	7	117	5	23	NA	NA	2	NA	NA	NA	2	2	1	2	6.1	168	3.63	NA	NA	NA	0.196
110137	7711.172228	8254.435268	1	52	2	17	4.4	62	17	28	17	101	132	0.91	2.7	5.27	23	71	153	283	2.6	4	141	0.4	9.4	138	7.1	74	4.1	24.5	1	2	2	5.88	2	2	2	2	2	2	17.3	203	8.52	NA	NA	NA	0.421
110138	4605.441866	5420.273161	2	1	5	NA	NA	NA	NA	NA	NA	NA	NA	NA	NA	NA	NA	NA	NA	NA	NA	NA	NA	NA	NA	NA	NA	NA	NA	NA	NA	NA	2	NA	NA	NA	NA	NA	NA	NA	NA	NA	NA	NA	NA	NA	NA
110139	27065.17493	29803.61814	1	41	2	22	4.1	66	15	30	15	99	82	0.83	3.3	5.94	53	59	117	283	3.4	4.3	141	0.8	9.3	187	7.4	102	6	36.3	NA	2	2	6.66	NA	NA	2	1	1	2	22.7	298	7.62	NA	NA	NA	0.384
110140	6837.791959	8104.467097	1	7	3	NA	NA	NA	NA	NA	NA	NA	NA	NA	NA	NA	NA	NA	NA	NA	NA	NA	NA	NA	NA	NA	NA	NA	NA	18.1	NA	NA	2	NA	NA	NA	NA	NA	NA	NA	3.6	60	6	NA	NA	NA	NA
110141	21869.94456	23120.3484	1	7	1	NA	NA	NA	NA	NA	NA	NA	NA	NA	NA	NA	NA	NA	NA	NA	NA	NA	NA	NA	NA	NA	NA	NA	NA	20.9	NA	NA	2	NA	NA	NA	NA	NA	NA	NA	6.4	97	6.6	NA	NA	NA	NA
110142	3929.592098	4137.29153	1	61	5	38	4.2	73	21	23	10	99	170	0.68	3.2	10.99	59	68	151	278	3.3	4.2	137	1.1	9.5	160	7.4	438	4.2	31.9	NA	1	1	NA	2	2	2	1	2	2	83.4	79	105.57	NA	NA	NA	1.065
110143	35336.00105	37949.18897	1	12	3	9	4.1	350	18	26	12	101	125	0.58	2.5	5.16	8	73	201	277	5.6	4.2	139	0.7	9.4	125	6.6	118	5.5	20.3	NA	NA	2	NA	NA	NA	NA	NA	NA	NA	15.6	142	10.99	0.35	0.56	12.4	0.345
110144	5480.734953	5600.420487	2	50	5	20	3.8	86	16	26	11	98	78	0.61	3.3	19.43	16	71	157	289	4.1	4.5	138	0.4	9	227	7.1	123	5	29.8	0	2	2	NA	2	2	2	2	2	2	8.7	92	9.46	NA	NA	NA	0.786
110145	7675.267469	8286.821237	2	13	5	NA	NA	NA	NA	NA	NA	NA	NA	NA	NA	NA	NA	NA	NA	NA	NA	NA	NA	NA	NA	NA	NA	NA	NA	25.1	NA	NA	2	5.05	NA	NA	NA	NA	NA	NA	12.6	78	16.15	NA	NA	NA	NA
110146	10760.89562	0	1	16	1	NA	NA	NA	NA	NA	NA	NA	NA	NA	NA	NA	NA	NA	NA	NA	NA	NA	NA	NA	NA	NA	NA	NA	NA	NA	NA	NA	2	NA	NA	NA	NA	2	NA	NA	NA	NA	NA	NA	NA	NA	NA
110147	20238.74036	21019.91452	2	60	1	37	3.3	78	56	25	18	105	43	0.6	3.2	5.5	64	113	142	283	3.7	3.6	141	0.8	8.7	178	6.5	139	6	37.3	0	2	2	5.83	1	2	2	1	2	2	19.8	136	14.56	NA	NA	NA	0.268
110148	50641.81737	53029.93303	1	14	3	15	4.1	178	20	27	17	99	145	1.05	2.7	4.94	12	127	139	277	3.9	4.6	138	0.4	9.9	163	6.8	129	5.2	21.5	NA	NA	2	5.33	NA	NA	NA	NA	NA	NA	3.4	135	2.52	NA	NA	NA	NA
110149	5647.100275	6130.26607	1	1	4	NA	NA	NA	NA	NA	NA	NA	NA	NA	NA	NA	NA	NA	NA	NA	NA	NA	NA	NA	NA	NA	NA	NA	NA	NA	NA	NA	2	NA	NA	NA	NA	NA	NA	NA	NA	NA	NA	NA	NA	NA	NA
110150	6477.614557	7097.891168	1	2	4	NA	NA	NA	NA	NA	NA	NA	NA	NA	NA	NA	NA	NA	NA	NA	NA	NA	NA	NA	NA	NA	NA	NA	NA	15.7	NA	NA	2	NA	NA	NA	NA	NA	NA	NA	NA	NA	NA	NA	NA	NA	NA
110151	5300.35993	5619.434472	2	63	5	24	4	71	19	26	20	100	50	0.71	2.9	9.33	20	83	146	278	3.9	3.8	136	0.7	8.8	180	6.9	146	5.3	32.8	NA	1	1	9.88	2	2	2	1	2	2	4.6	48	9.58	NA	NA	NA	0.74
110152	8556.055701	9807.45768	2	3	2	NA	NA	NA	NA	NA	NA	NA	NA	NA	NA	NA	NA	NA	NA	NA	NA	NA	NA	NA	NA	NA	NA	NA	NA	16.4	NA	NA	2	NA	NA	NA	NA	NA	NA	NA	11.7	49	23.88	0.47	0.56	6.16	NA
110153	7880.414648	8381.393729	1	70	5	13	4.1	41	20	27	20	100	61	1.11	3.3	4.55	16	111	140	279	3.5	4.5	139	0.5	9.2	186	7.4	78	4.2	23.4	0	2	2	4.88	2	2	2	2	2	2	4.6	73	6.3	1.8	0.56	11.99	1.013
110154	9829.527955	10167.31993	2	14	4	11	4.5	197	15	27	8	99	88	0.37	2.5	4.5	10	70	127	275	5.6	3.8	139	0.4	9.7	193	7	54	3.1	18.4	NA	NA	2	NA	NA	NA	NA	NA	NA	NA	25	240	10.42	NA	NA	NA	NA
110155	9980.566942	10750.103	1	22	4	12	4.4	53	17	26	10	103	247	1.11	2.9	4.39	16	166	136	281	3.7	4.1	142	1	9.4	126	7.3	59	5.1	25.7	NA	NA	2	4.94	NA	NA	2	2	2	2	7.3	262	2.79	NA	NA	NA	0.615
110156	4950.734915	5831.371224	2	1	3	NA	NA	NA	NA	NA	NA	NA	NA	NA	NA	NA	NA	NA	NA	NA	NA	NA	NA	NA	NA	NA	NA	NA	NA	NA	NA	NA	2	NA	NA	NA	NA	NA	NA	NA	NA	NA	NA	NA	NA	NA	NA
110157	7188.54101	0	1	51	5	NA	NA	NA	NA	NA	NA	NA	NA	NA	NA	NA	NA	NA	NA	NA	NA	NA	NA	NA	NA	NA	NA	NA	NA	NA	NA	2	2	NA	2	2	2	2	2	2	NA	NA	NA	NA	NA	NA	NA
110158	12103.83034	12307.22548	1	1	3	NA	NA	NA	NA	NA	NA	NA	NA	NA	NA	NA	NA	NA	NA	NA	NA	NA	NA	NA	NA	NA	NA	NA	NA	NA	NA	NA	2	NA	NA	NA	NA	NA	NA	NA	NA	NA	NA	NA	NA	NA	NA
110159	114838.9423	125290.688	1	45	3	14	4.1	61	21	25	6	100	253	0.87	2.9	5.11	10	91	175	277	3.5	4.4	140	0.4	9.4	206	7	51	5.2	22.8	NA	1	2	5.38	NA	NA	2	2	2	2	1.6	36	4.44	NA	NA	NA	1.628
110160	13000.12764	13870.30962	1	13	3	21	4.4	301	19	24	11	102	155	0.55	2.6	5	12	40	214	280	4.5	4	141	0.4	9.5	155	7	94	4	18.6	NA	NA	2	5.66	NA	NA	NA	NA	NA	NA	17.4	213	8.17	NA	NA	NA	0.353
110161	18628.09588	20718.92178	2	52	4	9	3.4	84	16	27	12	102	116	0.81	3.6	4.55	8	45	154	278	3.2	3.7	140	0.3	9	211	7	100	5.3	35.2	0	2	2	4.77	2	2	2	2	2	2	7.8	43	18.14	0.08	0.56	0.78	NA
110162	6729.783306	7145.1072	1	15	5	34	4.7	111	26	26	15	100	135	0.79	3	4.5	18	184	147	285	4.5	4.3	143	0.6	9.8	160	7.7	189	6.2	21.6	NA	NA	2	NA	NA	NA	NA	NA	NA	NA	8.3	158	5.25	0.26	0.56	4.28	NA
110163	12735.2947	13253.69947	2	13	5	13	3.8	138	23	26	8	106	390	0.61	3.4	4.83	17	99	174	277	4	4.5	140	0.3	9.6	173	7.2	43	3.5	26.1	NA	NA	2	5.11	NA	NA	NA	NA	NA	NA	6.2	157	3.95	1.26	0.56	9.97	1.843
110164	28036.2337	33359.19324	2	1	3	NA	NA	NA	NA	NA	NA	NA	NA	NA	NA	NA	NA	NA	NA	NA	NA	NA	NA	NA	NA	NA	NA	NA	NA	NA	NA	NA	2	NA	NA	NA	NA	NA	NA	NA	NA	NA	NA	NA	NA	NA	NA
110165	12324.64626	12627.13082	1	54	3	20	4	78	19	26	11	100	165	0.89	3	5.27	13	96	127	275	3.1	4.4	138	0.6	9.5	182	7	214	7.5	55	0	2	2	NA	2	2	2	1	2	2	5.1	70	7.29	0.08	0.56	1.75	1.039
110166	8805.84252	9019.683087	2	16	4	6	3.7	76	11	27	11	103	71	0.59	3.2	4.94	7	25	125	278	4.2	4.9	140	0.2	9.1	116	6.9	66	4.2	24.2	NA	NA	2	NA	NA	NA	NA	1	NA	NA	9	145	6.21	0.08	0.56	3.43	0.857
110167	4330.450003	4591.934081	2	29	4	10	3.6	56	13	26	8	108	166	0.72	2.9	4.44	24	45	150	288	3.8	3.9	146	0.8	9.1	163	6.5	54	5.6	40.5	NA	NA	2	NA	NA	NA	2	1	2	2	25.3	316	8.01	0.88	0.56	13.08	0.447
110168	25582.03138	26548.7456	2	54	4	24	4	82	20	25	18	101	427	0.86	3.9	5.77	43	93	183	282	3.8	4	140	0.2	9.4	262	7.9	148	6.6	31.1	0	2	2	6.16	2	2	2	2	2	2	10.5	135	7.78	NA	NA	NA	0.676
110169	19983.52901	22754.8675	1	30	3	36	4.2	70	23	25	14	101	162	1.11	3.2	5.5	46	96	189	287	3.4	4.1	144	0.2	9.1	244	7.4	406	6.5	34.7	NA	NA	2	5.94	NA	NA	2	1	2	2	15.2	283	5.37	0.08	0.56	10.05	0.6
110170	8565.666383	9654.778398	1	4	5	NA	NA	NA	NA	NA	NA	NA	NA	NA	NA	NA	NA	NA	NA	NA	NA	NA	NA	NA	NA	NA	NA	NA	NA	14.9	NA	NA	2	NA	NA	NA	NA	NA	NA	NA	8.4	98	8.57	2.17	1.18	30.24	NA
110171	8679.02451	9447.807682	2	22	4	32	4.4	64	28	23	11	102	324	0.78	2.8	4.61	12	84	140	282	3.7	4	142	0.2	9.2	161	7.2	44	2.9	21.3	NA	NA	2	NA	NA	NA	2	2	2	2	3.1	61	5.08	NA	NA	NA	1.759
110172	23238.10871	24870.19248	2	53	2	17	3.9	84	15	22	13	103	85	0.51	3	4.77	51	88	126	279	3.6	4.3	140	0.1	9.3	183	6.9	366	4.8	28.1	0	2	2	NA	2	2	2	2	2	2	9.4	50	18.8	0.08	0.56	4.13	2.213
110173	11578.29572	12985.23883	1	27	1	22	4.5	95	20	22	19	106	158	0.86	2.7	4.88	21	68	131	283	3.5	4	141	0.7	9.3	183	7.2	102	6.8	23.7	NA	NA	2	5.22	NA	NA	2	2	2	2	11.8	161	7.33	0.5	0.56	5.63	0.721
110174	16674.74327	17661.10988	1	25	2	19	4.6	71	22	26	12	98	289	1	3.1	4.72	17	70	146	280	3.8	4.2	141	0.4	10	143	7.7	66	6.2	26.8	NA	NA	2	4.94	NA	NA	2	2	2	2	2.6	85	3.06	NA	NA	NA	1.786
110175	21634.68495	23420.39408	1	30	1	20	4.2	50	20	26	22	102	283	1.23	3.5	4.94	16	141	91	286	4.1	4.1	142	0.4	9	147	7.7	155	5.3	34.5	NA	NA	2	5.5	NA	NA	2	1	2	2	15.5	196	7.91	NA	NA	NA	0.903
110176	60307.14383	63778.6853	2	38	3	45	3.7	179	52	22	14	101	129	0.91	3.7	5.16	161	96	133	280	4.3	4.2	140	0.2	9.5	228	7.4	225	6.3	32.9	NA	NA	2	NA	NA	NA	2	2	2	2	1678	121	1386.78	0.08	0.56	17.36	0.908
110177	6823.080468	7557.593762	2	5	4	NA	NA	NA	NA	NA	NA	NA	NA	NA	NA	NA	NA	NA	NA	NA	NA	NA	NA	NA	NA	NA	NA	NA	NA	14.2	NA	NA	2	NA	NA	NA	NA	NA	NA	NA	3.8	40	9.5	0.08	0.56	19.53	NA
110178	34410.77564	34563.83165	2	57	3	29	3.7	74	18	28	17	103	89	0.82	2.6	5.61	24	97	152	285	3.9	4	142	0.3	8.8	200	6.3	182	4.6	25.4	0	1	2	5.94	2	2	1	1	1	2	4.7	106	4.43	NA	NA	NA	0.55
110179	12657.70201	14229.34711	2	9	3	NA	NA	NA	NA	NA	NA	NA	NA	NA	NA	NA	NA	NA	NA	NA	NA	NA	NA	NA	NA	NA	NA	NA	NA	19.2	NA	NA	2	NA	NA	NA	NA	NA	NA	NA	4.1	15	27.33	0.08	0.56	0.66	3.075
110180	27442.79671	31041.69074	1	80	3	22	4	70	22	30	11	103	81	0.92	2.3	6.33	24	132	164	285	3.1	4.2	143	0.7	8.9	129	6.3	82	5.4	23.4	1	1	2	6.77	2	2	1	2	2	2	3.8	49	7.76	NA	NA	NA	0.9
110181	13604.08963	14507.27337	2	12	3	NA	NA	NA	NA	NA	NA	NA	NA	NA	NA	NA	NA	NA	NA	NA	NA	NA	NA	NA	NA	NA	NA	NA	NA	15.4	NA	NA	2	NA	NA	NA	NA	NA	NA	NA	2.5	25	10	NA	NA	NA	1.287
110182	55267.72005	54193.98411	2	61	3	36	4.2	79	24	28	23	100	162	1.15	2.9	5.38	20	95	172	289	4	3.4	143	0.8	9.7	264	7.1	243	7.4	48.6	1	1	2	NA	2	1	2	1	2	2	0.9	18	5	0.08	0.56	0.51	4.848
110183	15029.87685	17472.60641	1	4	1	NA	NA	NA	NA	NA	NA	NA	NA	NA	NA	NA	NA	NA	NA	NA	NA	NA	NA	NA	NA	NA	NA	NA	NA	15.7	NA	NA	2	NA	NA	NA	NA	NA	NA	NA	1.9	11	17.27	0.08	0.56	1	NA
110184	10516.43943	10832.72902	2	59	5	24	3.7	91	25	26	9	103	96	0.92	3.6	5.27	22	69	135	282	2.6	3.8	142	0.3	8.9	229	7.3	179	5.8	26.9	1	2	2	NA	2	2	2	1	1	2	7.3	68	10.74	0.08	0.56	45.61	1.024
110185	10884.09132	12720.73882	2	80	3	18	3.9	80	19	29	20	97	66	0.96	1.9	8.66	10	94	136	276	3.3	4.5	135	1.6	9.5	141	5.8	87	3.9	30	1	1	1	9.16	1	2	1	1	2	2	6.5	106	6.13	NA	NA	NA	0.593
110186	11681.86049	12875.12168	2	27	4	11	3.4	71	15	25	9	104	127	0.78	3.1	6.44	12	39	140	283	4.1	3.9	142	0.3	8.8	184	6.5	66	3.1	31.9	NA	NA	2	NA	NA	NA	2	2	2	2	13.5	279	4.84	NA	NA	NA	0.438
110187	6442.42011	6907.204522	2	58	4	12	3.7	71	12	24	16	108	79	0.87	3.3	5.05	28	103	175	289	3.7	4.2	145	0.3	9.4	220	7	103	4.4	44	0	2	2	5.55	2	1	2	1	2	2	106.2	73	145.48	0.08	0.56	7.46	1
110188	9969.66924	10453.65282	2	63	4	19	4	101	19	25	12	102	137	0.84	3.3	6.66	75	70	165	278	3.6	4.1	139	0.4	9.3	268	7.3	83	4.2	28.3	1	2	2	7.05	2	2	2	2	2	2	7.1	139	5.11	0.22	0.56	2.77	0.621
110189	7691.709547	7857.335381	2	0	3	NA	NA	NA	NA	NA	NA	NA	NA	NA	NA	NA	NA	NA	NA	NA	NA	NA	NA	NA	NA	NA	NA	NA	NA	NA	NA	NA	NA	NA	NA	NA	NA	NA	NA	NA	NA	NA	NA	NA	NA	NA	NA
110190	12701.59079	12635.71922	2	19	3	12	4.1	67	20	20	8	106	58	0.74	3	5	12	55	123	281	4	4	142	0.2	9	169	7.1	84	3.2	23.9	NA	NA	2	5.16	NA	NA	NA	2	NA	NA	7.3	91	8.02	NA	NA	NA	0.953
110191	21543.34316	24956.81204	1	80	3	21	4.3	83	27	26	18	102	91	1.21	2.5	4.72	18	84	241	282	3.8	4.9	141	0.7	8.7	150	6.8	68	6.1	19.1	1	2	2	NA	2	2	1	2	2	2	9.7	90	10.78	0.08	0.56	17.14	0.528
110192	27783.35231	31290.15653	1	9	3	NA	NA	NA	NA	NA	NA	NA	NA	NA	NA	NA	NA	NA	NA	NA	NA	NA	NA	NA	NA	NA	NA	NA	NA	23.5	NA	NA	2	NA	NA	NA	NA	NA	NA	NA	8.5	53	16.04	NA	NA	NA	NA
110193	11365.16398	0	2	18	5	NA	NA	NA	NA	NA	NA	NA	NA	NA	NA	NA	NA	NA	NA	NA	NA	NA	NA	NA	NA	NA	NA	NA	NA	NA	NA	NA	2	NA	NA	NA	NA	2	NA	NA	NA	NA	NA	NA	NA	NA	NA
110194	38956.55942	43051.70466	2	74	3	17	4.2	66	20	25	18	105	35	0.67	2.8	4.66	15	96	128	288	3.7	4.3	144	0.3	9.8	223	7	183	4.9	38.5	0	2	3	NA	2	2	2	1	2	2	5.6	81	6.91	NA	NA	NA	0.835
110195	10880.06272	12180.17958	1	14	2	23	4.4	199	20	26	9	106	103	0.85	2.8	5.16	14	64	172	293	4.5	5.1	148	0.4	9.8	101	7.2	62	6.7	25.5	NA	NA	2	5.66	NA	NA	NA	NA	NA	NA	14.8	160	9.25	0.08	0.56	4.58	0.603
110196	8007.727888	8571.700781	1	67	4	8	4	89	16	25	7	101	159	0.8	3.1	5.27	15	139	188	279	2.9	3.6	141	0.7	9	158	7.1	82	9	28.2	1	2	2	NA	2	2	2	2	2	2	32.3	264	12.23	NA	NA	NA	0.491
110197	16734.20859	0	1	10	5	NA	NA	NA	NA	NA	NA	NA	NA	NA	NA	NA	NA	NA	NA	NA	NA	NA	NA	NA	NA	NA	NA	NA	NA	NA	NA	NA	2	NA	NA	NA	NA	NA	NA	NA	NA	NA	NA	NA	NA	NA	NA
110198	36524.00939	0	1	35	1	NA	NA	NA	NA	NA	NA	NA	NA	NA	NA	NA	NA	NA	NA	NA	NA	NA	NA	NA	NA	NA	NA	NA	NA	NA	NA	NA	2	NA	NA	NA	2	1	2	2	NA	NA	NA	NA	NA	NA	NA
110199	43452.72768	45510.58134	1	17	3	21	4.4	64	17	24	12	101	110	0.83	2.8	4.83	18	97	165	280	3.2	4	141	0.5	9.3	108	7.2	48	3.9	29	NA	NA	2	5.5	NA	NA	NA	1	NA	NA	16	268	5.97	NA	NA	NA	0.542
110200	11213.83322	12035.65735	2	60	4	16	4	95	20	23	15	107	309	0.77	3.3	5.44	17	77	251	288	3.5	4	144	0.4	9.5	199	7.3	79	5.2	28.6	0	1	1	NA	2	2	2	2	2	2	152	122	124.59	NA	NA	NA	0.549
110201	78520.43198	82185.13616	1	37	3	NA	NA	NA	NA	NA	NA	NA	NA	NA	NA	NA	NA	NA	NA	NA	NA	NA	NA	NA	NA	NA	NA	NA	NA	40.8	NA	NA	2	NA	NA	NA	2	1	2	2	9	195	4.62	NA	NA	NA	0.936
110202	5939.925679	6418.694455	1	8	2	NA	NA	NA	NA	NA	NA	NA	NA	NA	NA	NA	NA	NA	NA	NA	NA	NA	NA	NA	NA	NA	NA	NA	NA	26.7	NA	NA	2	NA	NA	NA	NA	NA	NA	NA	6.1	143	4.27	NA	NA	NA	NA
110203	28676.83791	31577.97424	1	12	2	12	4.6	334	19	26	12	101	191	0.63	2.3	4.88	10	85	242	280	5.4	3.9	141	0.3	9.4	144	6.9	53	4	26.1	NA	NA	2	NA	NA	NA	NA	NA	NA	NA	5.6	141	3.97	NA	NA	NA	1.067
110204	12891.3582	13846.51596	1	70	3	30	4.1	49	33	25	15	106	110	1	2.9	5.5	90	133	144	290	3.6	4.8	145	0.7	9.2	199	7	37	6.2	26.8	1	2	2	6	2	2	2	2	2	2	10.3	223	4.62	NA	NA	NA	0.202
110205	27350.39507	30271.87572	1	13	1	11	4.5	304	24	25	13	97	150	0.75	3.6	4.77	12	92	187	275	4	3.9	138	0.2	10	165	8.1	68	3.7	19.3	NA	NA	2	NA	NA	NA	NA	NA	NA	NA	10.6	139	7.63	0.65	0.56	4.12	0.399
110206	17316.81616	18269.27861	1	37	2	43	3.9	123	62	23	8	100	134	0.67	3.1	5.77	136	119	210	274	3.4	3.8	138	0.2	9.1	239	7	141	5.9	32.9	NA	NA	2	6.22	NA	NA	2	1	2	2	37.7	489	7.71	1.45	0.56	7.82	0.193
110207	13762.34714	14389.82456	2	52	5	14	4	89	13	27	9	102	119	0.68	3	8.6	14	79	150	281	3.7	4.1	140	0.7	9.4	242	7	141	4.3	26.8	1	1	3	9.27	2	2	2	2	2	2	5.8	65	8.92	0.28	0.56	3.34	NA
110208	8459.076073	8679.000662	2	57	5	23	4.1	108	19	25	9	105	61	0.77	3.2	5	18	109	130	283	2.4	3.6	143	0.3	8.9	216	7.3	196	5.3	37.9	NA	2	2	5.22	2	2	2	2	2	2	35.4	397	8.92	NA	NA	NA	NA
110209	38094.67084	41027.50782	2	5	3	NA	NA	NA	NA	NA	NA	NA	NA	NA	NA	NA	NA	NA	NA	NA	NA	NA	NA	NA	NA	NA	NA	NA	NA	13.3	NA	NA	2	NA	NA	NA	NA	NA	NA	NA	106	91	116.48	0.08	0.56	9.05	NA
110210	4168.280715	4629.176755	1	0	2	NA	NA	NA	NA	NA	NA	NA	NA	NA	NA	NA	NA	NA	NA	NA	NA	NA	NA	NA	NA	NA	NA	NA	NA	NA	NA	NA	NA	NA	NA	NA	NA	NA	NA	NA	NA	NA	NA	NA	NA	NA	NA
110211	29495.83129	30637.27429	2	43	3	19	4.2	45	18	26	13	103	68	0.76	2.7	4.83	16	132	146	281	3.7	4.5	141	0.8	9.2	187	6.9	81	4.2	21.2	NA	2	2	5.16	NA	NA	2	2	2	2	4.9	79	6.2	NA	NA	NA	0.702
110212	20863.79559	22771.09825	2	2	3	NA	NA	NA	NA	NA	NA	NA	NA	NA	NA	NA	NA	NA	NA	NA	NA	NA	NA	NA	NA	NA	NA	NA	NA	17.9	NA	NA	2	NA	NA	NA	NA	NA	NA	NA	NA	NA	NA	NA	NA	NA	NA
110213	59664.79484	62227.3007	2	25	5	22	4.5	69	16	22	14	101	77	0.71	3	5.27	37	121	126	280	3.5	4.3	140	0.3	9.7	249	7.5	138	4.2	25.2	NA	NA	2	5.83	NA	NA	2	2	2	2	5.9	164	3.6	NA	NA	NA	0.489
110214	19548.83499	20516.5127	2	32	4	11	4	43	19	23	14	99	65	0.62	6	4.94	17	77	112	272	3.6	4.2	136	0.3	8.9	152	10	63	3.1	20.8	NA	NA	2	NA	NA	NA	2	2	2	2	9.9	218	4.54	0.91	0.56	5.06	0.457
110215	7320.011336	7909.35379	2	0	4	NA	NA	NA	NA	NA	NA	NA	NA	NA	NA	NA	NA	NA	NA	NA	NA	NA	NA	NA	NA	NA	NA	NA	NA	NA	NA	NA	NA	NA	NA	NA	NA	NA	NA	NA	NA	NA	NA	NA	NA	NA	NA
110216	15954.19456	17014.23695	1	10	3	NA	NA	NA	NA	NA	NA	NA	NA	NA	NA	NA	NA	NA	NA	NA	NA	NA	NA	NA	NA	NA	NA	NA	NA	19	NA	NA	2	NA	NA	NA	NA	NA	NA	NA	1	27	3.7	0.08	0.56	0.61	NA
110217	34546.99418	37035.05198	2	60	2	26	4.2	51	21	26	15	101	99	0.63	3	6.05	26	86	179	281	2.8	4.3	140	0.2	8.9	263	7.2	124	5.2	26.6	1	2	2	6.38	2	2	2	1	2	2	5.4	103	5.24	NA	NA	NA	0.641
110218	24426.87356	26321.97144	2	28	2	14	3.8	59	16	23	10	103	57	0.6	3.7	5.88	12	77	128	281	3.7	3.9	141	0.3	9	130	7.5	39	4.3	23.5	NA	NA	2	NA	NA	NA	1	2	1	2	8.5	169	5.03	NA	NA	NA	NA
110219	22279.3945	25592.15169	1	2	3	NA	NA	NA	NA	NA	NA	NA	NA	NA	NA	NA	NA	NA	NA	NA	NA	NA	NA	NA	NA	NA	NA	NA	NA	15.6	NA	NA	2	NA	NA	NA	NA	NA	NA	NA	NA	NA	NA	NA	NA	NA	NA
110220	6581.611041	7225.239412	1	0	5	NA	NA	NA	NA	NA	NA	NA	NA	NA	NA	NA	NA	NA	NA	NA	NA	NA	NA	NA	NA	NA	NA	NA	NA	NA	NA	NA	NA	NA	NA	NA	NA	NA	NA	NA	NA	NA	NA	NA	NA	NA	NA
110221	13031.94782	15899.30204	1	80	3	10	3.4	67	19	28	20	104	77	1.05	3.1	4.22	18	80	213	284	3.7	4.4	142	0.5	9.2	143	6.5	82	5.5	NA	NA	1	2	NA	2	2	2	2	1	2	2.5	90	2.78	0.08	0.56	3.89	0.571
110222	94114.18486	98638.39579	1	18	3	NA	NA	NA	NA	NA	NA	NA	NA	NA	NA	NA	NA	NA	NA	NA	NA	NA	NA	NA	NA	NA	NA	NA	NA	20.1	NA	NA	2	NA	NA	NA	NA	2	NA	NA	8.1	117	6.92	NA	NA	NA	1.222
110223	49243.50414	50960.42748	1	71	3	29	3.9	61	21	27	20	101	220	1.21	2.9	5.38	23	69	180	288	3.6	3.8	143	0.7	9.8	129	6.8	90	7	31.1	1	1	2	5.94	2	2	2	1	2	2	9.6	296	3.24	0.51	0.56	24.3	0.408
110224	26932.6184	28637.71526	2	34	1	13	3.7	111	13	23	14	101	122	0.68	3.3	5	20	105	162	279	2.5	3.6	140	0.5	8.4	185	7	136	5.8	36.2	NA	NA	2	NA	NA	NA	2	2	2	2	12.9	215	6	NA	NA	NA	0.314
110225	14106.25011	15443.75588	1	17	4	36	4.3	91	21	27	8	104	291	0.92	2.6	4.72	20	87	178	284	3.9	4.2	144	0.3	9.3	189	6.9	56	5.2	47.9	NA	NA	2	NA	NA	NA	NA	1	NA	NA	5.8	183	3.17	NA	NA	NA	0.686
110226	39179.32171	42481.52558	2	26	4	14	4.1	69	14	23	12	103	120	0.81	3	5.66	16	30	107	276	3.6	4.3	138	0.2	9.6	182	7.1	73	4.8	29.4	NA	NA	2	6.11	NA	NA	2	1	2	2	5.4	84	6.43	NA	NA	NA	1.289
110227	25308.78614	27382.04267	2	7	3	NA	NA	NA	NA	NA	NA	NA	NA	NA	NA	NA	NA	NA	NA	NA	NA	NA	NA	NA	NA	NA	NA	NA	NA	14.9	NA	NA	2	NA	NA	NA	NA	NA	NA	NA	51.2	36	142.22	NA	NA	NA	0.774
110228	19449.0118	20051.18624	1	44	4	23	4	63	20	28	17	102	249	1.17	3.4	5.55	36	74	184	277	3.1	4.4	138	0.5	9.6	273	7.4	93	8.6	36.1	NA	2	2	6.11	NA	NA	2	1	2	2	6.8	237	2.87	0.8	0.56	9.6	1.261
110229	59374.50292	0	2	9	3	NA	NA	NA	NA	NA	NA	NA	NA	NA	NA	NA	NA	NA	NA	NA	NA	NA	NA	NA	NA	NA	NA	NA	NA	NA	NA	NA	2	NA	NA	NA	NA	NA	NA	NA	NA	NA	NA	NA	NA	NA	NA
110230	2847.318692	0	1	6	5	NA	NA	NA	NA	NA	NA	NA	NA	NA	NA	NA	NA	NA	NA	NA	NA	NA	NA	NA	NA	NA	NA	NA	NA	NA	NA	NA	2	NA	NA	NA	NA	NA	NA	NA	NA	NA	NA	NA	NA	NA	NA
110231	21735.23768	0	1	43	4	NA	NA	NA	NA	NA	NA	NA	NA	NA	NA	NA	NA	NA	NA	NA	NA	NA	NA	NA	NA	NA	NA	NA	NA	NA	NA	2	2	NA	NA	NA	2	2	2	2	NA	NA	NA	NA	NA	NA	NA
110232	1955.477164	2089.693716	1	62	4	NA	NA	NA	NA	NA	NA	NA	NA	NA	NA	NA	NA	NA	NA	NA	NA	NA	NA	NA	NA	NA	NA	NA	NA	51.2	1	2	1	6.27	2	2	2	1	2	2	16.8	130	12.92	0.08	0.56	3.01	0.921
110233	13432.99686	14901.46415	1	5	3	NA	NA	NA	NA	NA	NA	NA	NA	NA	NA	NA	NA	NA	NA	NA	NA	NA	NA	NA	NA	NA	NA	NA	NA	15.9	NA	NA	2	NA	NA	NA	NA	NA	NA	NA	11.7	38	30.79	0.08	0.56	2.87	NA
110234	23705.77027	24778.56073	2	40	4	13	3.9	67	14	26	10	101	76	0.67	3.4	5.83	18	83	129	277	3.3	4.1	139	0.3	9.2	126	7.3	60	5.5	35.8	NA	2	2	6.27	NA	NA	2	1	2	2	38.8	203	19.11	0.58	0.56	7.1	0.48
110235	16404.23505	18575.79817	1	41	5	23	4.2	30	21	24	15	102	292	0.99	2.7	5.33	63	140	144	280	3	4.8	140	0.4	9.3	144	6.9	114	8.1	31.6	NA	1	1	5.61	NA	NA	2	1	2	2	4.3	73	5.89	NA	NA	NA	2.468
110236	14002.8142	15439.98362	1	39	5	13	4.5	51	17	25	14	100	328	0.67	3.1	5.33	9	123	177	278	3.3	3.6	139	1	9.4	178	7.6	88	4.8	22.2	NA	NA	2	NA	NA	NA	2	2	2	2	5.1	80	6.38	NA	NA	NA	1.345
110237	22339.05335	23616.76982	2	14	2	9	4.1	92	19	23	6	102	71	0.39	3.1	4.72	5	140	NA	274	4.5	4.6	139	0.4	9	143	7.2	42	3.2	14.6	NA	NA	2	4.94	NA	NA	NA	NA	NA	NA	16.5	52	31.73	0.08	0.56	6.79	NA
110238	11460.39137	12368.35332	2	2	3	NA	NA	NA	NA	NA	NA	NA	NA	NA	NA	NA	NA	NA	NA	NA	NA	NA	NA	NA	NA	NA	NA	NA	NA	15.1	NA	NA	2	NA	NA	NA	NA	NA	NA	NA	NA	NA	NA	NA	NA	NA	NA
110239	58752.31669	0	1	16	3	NA	NA	NA	NA	NA	NA	NA	NA	NA	NA	NA	NA	NA	NA	NA	NA	NA	NA	NA	NA	NA	NA	NA	NA	NA	NA	NA	2	NA	NA	NA	NA	2	NA	NA	NA	NA	NA	NA	NA	NA	NA
110240	45327.12119	51137.22994	1	37	1	60	4.2	70	30	29	12	97	117	0.73	3.7	5.61	64	102	158	274	3.8	4.1	137	0.7	9.3	191	7.9	199	6.1	35.4	NA	NA	1	6	NA	NA	2	1	2	2	64.2	170	37.76	0.08	0.56	6.41	0.829
110241	4328.667876	4575.465524	1	60	4	NA	NA	NA	NA	NA	NA	NA	NA	NA	NA	NA	NA	NA	NA	NA	NA	NA	NA	NA	NA	NA	NA	NA	NA	29.3	0	2	1	NA	2	2	1	2	2	2	133.7	171	78.19	0.08	0.56	6.16	0.304
110242	5200.056534	5267.945929	1	80	4	6	3.5	182	6	14	61	117	65	9.11	3.1	5.38	16	29	168	310	4.9	5.1	147	0.5	8.8	102	6.6	95	5.4	NA	NA	1	2	5.5	2	2	2	2	2	1	317	79	401.27	0.08	0.56	3.23	NA
110243	29929.57585	33565.71479	2	29	4	12	4.2	54	19	26	8	102	198	0.66	3.3	5.05	21	98	155	275	3.2	3.5	139	0.4	9.4	226	7.5	62	5.3	25	NA	NA	2	NA	NA	NA	2	2	2	2	2.6	55	4.73	NA	NA	NA	NA
110244	17990.84926	19427.86666	1	10	3	NA	NA	NA	NA	NA	NA	NA	NA	NA	NA	NA	NA	NA	NA	NA	NA	NA	NA	NA	NA	NA	NA	NA	NA	15.6	NA	NA	2	NA	NA	NA	NA	NA	NA	NA	5.5	34	16.18	NA	NA	NA	0.719
110245	6273.516211	7121.065242	2	12	5	10	3.9	193	15	24	14	97	64	0.53	3.6	4.33	9	24	146	275	4.3	3.5	138	0.5	9.2	141	7.5	49	3.6	16	NA	NA	2	NA	NA	NA	NA	NA	NA	NA	19.7	183	10.77	NA	NA	NA	0.26
110246	8874.080095	11093.17216	2	80	3	9	3.1	69	15	30	27	102	21	1.12	3.6	5.94	14	78	99	289	3.4	4.7	142	0.3	9.2	195	6.7	116	5.1	NA	NA	2	2	6.49	1	2	2	2	2	9	NA	NA	NA	NA	NA	NA	NA
110247	23480.57223	24154.46906	2	31	2	15	4	92	15	24	8	101	99	0.62	3	4.44	14	48	152	280	3.7	4	142	0.2	9	185	7	92	5.4	37.4	NA	NA	2	NA	NA	NA	2	1	2	2	6.4	85	7.53	0.08	0.56	3.37	0.88
110248	10520.68004	11010.77923	2	29	5	9	3.6	55	12	26	8	101	27	0.64	3.5	4.44	20	67	98	277	3	3.8	140	0.3	9.2	210	7.1	127	4.7	23.1	NA	NA	2	5	NA	NA	2	2	2	2	NA	NA	NA	NA	NA	NA	NA
110249	8825.421866	9430.218069	2	13	4	14	4.1	103	25	26	13	102	393	0.76	3.4	4.44	10	114	174	277	4.1	4	139	0.3	9.4	140	7.5	84	5.2	25.1	NA	NA	2	5.16	NA	NA	NA	NA	NA	NA	11.6	255	4.55	NA	NA	NA	0.398
110250	19836.1199	21454.76693	1	34	1	10	4.2	84	10	25	12	105	127	1.03	2.4	5.27	15	78	153	286	4.6	4.2	144	0.2	9.1	130	6.6	182	5.9	40.9	NA	NA	2	NA	NA	NA	2	1	2	2	7.5	76	9.87	0.08	0.56	3.67	2.526
110251	3791.082427	4059.569113	2	60	4	14	4.6	82	24	26	10	101	367	0.8	3.2	4	19	165	191	279	4.1	4.1	141	0.2	10.1	159	7.8	250	5.2	24.5	0	2	2	NA	2	2	2	2	2	2	1.9	16	11.88	NA	NA	NA	0.75
110252	8562.029376	8982.032014	1	70	5	25	3.9	96	24	25	14	106	309	0.79	2.4	5.44	26	63	182	285	3.3	4.2	143	0.2	8.8	197	6.3	70	3	21.5	1	1	2	NA	2	1	2	2	2	2	7.7	109	7.06	0.08	0.56	2.86	0.278
110253	11500.85854	13883.16265	1	1	5	NA	NA	NA	NA	NA	NA	NA	NA	NA	NA	NA	NA	NA	NA	NA	NA	NA	NA	NA	NA	NA	NA	NA	NA	NA	NA	NA	2	NA	NA	NA	NA	NA	NA	NA	NA	NA	NA	NA	NA	NA	NA
110254	9866.002109	10315.48703	1	60	4	NA	NA	NA	NA	NA	NA	NA	NA	NA	NA	NA	NA	NA	NA	NA	NA	NA	NA	NA	NA	NA	NA	NA	NA	22.3	0	2	2	NA	2	2	1	2	2	2	9.6	129	7.44	NA	NA	NA	0.275
110255	11550.95673	11937.80536	1	11	2	NA	NA	NA	NA	NA	NA	NA	NA	NA	NA	NA	NA	NA	NA	NA	NA	NA	NA	NA	NA	NA	NA	NA	NA	17.3	NA	NA	2	NA	NA	NA	NA	NA	NA	NA	15.4	95	16.21	1.04	0.56	6.63	0.311
110256	8463.023104	10471.68934	2	1	5	NA	NA	NA	NA	NA	NA	NA	NA	NA	NA	NA	NA	NA	NA	NA	NA	NA	NA	NA	NA	NA	NA	NA	NA	NA	NA	NA	2	NA	NA	NA	NA	NA	NA	NA	NA	NA	NA	NA	NA	NA	NA
110257	1938.156563	2096.805364	1	0	5	NA	NA	NA	NA	NA	NA	NA	NA	NA	NA	NA	NA	NA	NA	NA	NA	NA	NA	NA	NA	NA	NA	NA	NA	NA	NA	NA	NA	NA	NA	NA	NA	NA	NA	NA	NA	NA	NA	NA	NA	NA	NA
110258	6567.530597	7719.324361	1	70	5	12	3.5	56	15	27	21	99	77	0.95	2.6	5.55	13	30	165	279	3.9	4.1	138	0.3	9.3	159	6.1	65	4.5	19.1	0	2	2	5.94	2	2	2	2	2	2	269.5	201	134.08	NA	NA	NA	0.293
110259	2171.945233	2405.757901	2	2	4	NA	NA	NA	NA	NA	NA	NA	NA	NA	NA	NA	NA	NA	NA	NA	NA	NA	NA	NA	NA	NA	NA	NA	NA	17.3	NA	NA	2	NA	NA	NA	NA	NA	NA	NA	NA	NA	NA	NA	NA	NA	NA
110260	13205.13654	16163.65387	1	11	3	NA	NA	NA	NA	NA	NA	NA	NA	NA	NA	NA	NA	NA	NA	NA	NA	NA	NA	NA	NA	NA	NA	NA	NA	24.8	NA	NA	2	NA	NA	NA	NA	NA	NA	NA	8.5	132	6.44	NA	NA	NA	NA
110261	22611.40536	23338.68918	1	8	1	NA	NA	NA	NA	NA	NA	NA	NA	NA	NA	NA	NA	NA	NA	NA	NA	NA	NA	NA	NA	NA	NA	NA	NA	16.4	NA	NA	2	NA	NA	NA	NA	NA	NA	NA	9.6	30	32	NA	NA	NA	0.31
110262	7767.583825	8587.943189	1	10	3	NA	NA	NA	NA	NA	NA	NA	NA	NA	NA	NA	NA	NA	NA	NA	NA	NA	NA	NA	NA	NA	NA	NA	NA	23.9	NA	NA	2	NA	NA	NA	NA	NA	NA	NA	2.7	32	8.44	NA	NA	NA	0.8
110263	3539.910596	3696.043676	1	0	3	NA	NA	NA	NA	NA	NA	NA	NA	NA	NA	NA	NA	NA	NA	NA	NA	NA	NA	NA	NA	NA	NA	NA	NA	NA	NA	NA	NA	NA	NA	NA	NA	NA	NA	NA	NA	NA	NA	NA	NA	NA	NA
110264	2735.244816	2922.981669	1	63	5	8	4	90	15	26	13	101	200	0.91	4	6	21	58	142	280	3.3	3.8	140	0.3	9.6	232	8	116	6.2	25.1	0	2	2	6.49	2	2	1	2	2	2	9.6	144	6.67	NA	NA	NA	0.524
110265	16123.45546	16008.38625	1	42	1	37	4.7	101	21	26	14	99	215	0.95	3.5	5.61	122	148	166	282	3.8	3.9	141	0.3	9.8	215	8.2	156	7.7	25.9	NA	2	2	NA	NA	NA	2	2	2	2	15.5	294	5.27	NA	NA	NA	0.379
110266	12697.41785	13538.75825	2	29	4	18	4.2	102	19	24	13	100	201	0.84	3.5	4.39	12	52	217	282	4.1	4.1	142	0.2	9.2	170	7.7	73	5.7	34.1	NA	NA	2	NA	NA	NA	2	2	2	2	117.7	202	58.27	0.55	0.56	35.82	0.659
110267	53554.11329	58312.48134	1	15	3	49	4.5	121	28	26	9	105	257	0.59	2.4	5.16	23	132	187	283	4.1	4.3	143	0.5	9.1	131	6.9	83	6.4	32.5	NA	NA	2	5.61	NA	NA	NA	NA	NA	NA	10.2	146	6.99	NA	NA	NA	NA
110268	2998.613423	3461.497545	1	7	5	NA	NA	NA	NA	NA	NA	NA	NA	NA	NA	NA	NA	NA	NA	NA	NA	NA	NA	NA	NA	NA	NA	NA	NA	16.4	NA	NA	2	NA	NA	NA	NA	NA	NA	NA	3.8	45	8.44	0.94	0.56	34.19	0.574
110269	24913.51192	28185.2209	2	1	3	NA	NA	NA	NA	NA	NA	NA	NA	NA	NA	NA	NA	NA	NA	NA	NA	NA	NA	NA	NA	NA	NA	NA	NA	NA	NA	NA	2	NA	NA	NA	NA	NA	NA	NA	NA	NA	NA	NA	NA	NA	NA
110270	5407.77273	5605.183452	1	60	5	15	3.6	94	12	24	13	103	232	1.27	2.7	14.1	24	99	167	286	3.1	4.7	139	0.3	8.8	140	6.3	117	5.3	41.5	1	1	1	NA	2	2	2	1	2	2	8.4	140	6	NA	NA	NA	1.246
110271	2346.700945	2500.427574	1	8	4	NA	NA	NA	NA	NA	NA	NA	NA	NA	NA	NA	NA	NA	NA	NA	NA	NA	NA	NA	NA	NA	NA	NA	NA	21.7	NA	NA	2	NA	NA	NA	NA	NA	NA	NA	7.2	87	8.28	NA	NA	NA	0.429
110272	18168.41438	20379.97516	1	45	1	25	4.3	71	16	23	21	103	113	1.03	2.2	5.83	30	141	125	283	3.2	4.3	140	0.7	9.3	165	6.5	90	6.1	27.2	NA	2	2	6.22	NA	NA	1	1	1	2	14.3	187	7.65	NA	NA	NA	0.611
110273	35039.50488	41682.12639	2	75	3	22	3.8	66	18	23	18	98	74	1.06	2.8	5.94	19	47	139	271	4.1	4	134	0.2	9.1	163	6.6	138	7.8	35.2	0	2	1	6.05	2	1	2	1	2	2	6.3	63	10	NA	NA	NA	1.143
110274	9448.388864	10596.54375	2	80	2	NA	NA	NA	NA	NA	NA	NA	NA	NA	NA	NA	NA	NA	NA	NA	NA	NA	NA	NA	NA	NA	NA	NA	NA	NA	NA	2	2	NA	1	2	2	2	2	2	31.1	32	97.19	NA	NA	NA	0.653
110275	10786.46446	12224.27679	1	12	4	20	4.3	370	28	27	10	99	487	0.6	3.2	4.27	20	102	258	279	4.7	4.4	141	0.3	9.5	112	7.5	59	4	18.2	NA	NA	2	NA	NA	NA	NA	NA	NA	NA	1	18	5.56	NA	NA	NA	0.427
110276	95769.59325	98786.30434	1	46	3	30	4.5	81	18	29	13	99	66	1.19	2.8	5.11	22	127	129	279	3.4	4.4	140	0.9	9.6	156	7.3	114	7.2	26.3	NA	2	2	NA	NA	NA	2	2	2	2	10.7	279	3.84	NA	NA	NA	0.137
110277	4312.628677	4116.817674	2	0	3	NA	NA	NA	NA	NA	NA	NA	NA	NA	NA	NA	NA	NA	NA	NA	NA	NA	NA	NA	NA	NA	NA	NA	NA	NA	NA	NA	NA	NA	NA	NA	NA	NA	NA	NA	NA	NA	NA	NA	NA	NA	NA
110278	5335.864043	0	1	52	4	NA	NA	NA	NA	NA	NA	NA	NA	NA	NA	NA	NA	NA	NA	NA	NA	NA	NA	NA	NA	NA	NA	NA	NA	NA	NA	2	2	NA	2	2	2	2	2	2	NA	NA	NA	NA	NA	NA	NA
110279	10138.90032	11286.11634	2	70	5	36	3.8	90	31	28	7	102	547	0.78	3.5	4.27	19	43	212	285	3.5	4	145	0.5	9.2	160	7.3	92	6.3	36.8	1	2	2	NA	2	2	1	2	2	2	4.3	101	4.26	NA	NA	NA	0.885
110280	5018.906041	5520.339176	2	0	3	NA	NA	NA	NA	NA	NA	NA	NA	NA	NA	NA	NA	NA	NA	NA	NA	NA	NA	NA	NA	NA	NA	NA	NA	NA	NA	NA	NA	NA	NA	NA	NA	NA	NA	NA	NA	NA	NA	NA	NA	NA	NA
110281	11603.36829	12133.46838	1	14	1	111	4.5	116	55	25	9	101	69	0.61	3.8	4.27	72	80	153	281	5.1	4.2	142	0.3	9.7	202	8.3	354	6.6	33.1	NA	NA	2	NA	NA	NA	NA	NA	NA	NA	10.8	94	11.49	NA	NA	NA	2.128
110282	8467.594002	10277.26918	2	12	5	NA	NA	NA	NA	NA	NA	NA	NA	NA	NA	NA	NA	NA	NA	NA	NA	NA	NA	NA	NA	NA	NA	NA	NA	15.1	NA	NA	2	NA	NA	NA	NA	NA	NA	NA	13.2	141	9.36	NA	NA	NA	0.653
110283	6114.629375	6607.479586	1	10	1	NA	NA	NA	NA	NA	NA	NA	NA	NA	NA	NA	NA	NA	NA	NA	NA	NA	NA	NA	NA	NA	NA	NA	NA	28.7	NA	NA	2	NA	NA	NA	NA	NA	NA	NA	8.7	116	7.5	0.08	0.56	2	NA
110284	16911.46246	17585.68085	1	14	2	152	4.2	364	86	22	12	101	144	0.44	2.9	5.33	48	107	316	275	5.7	4	138	0.3	9.3	183	7.1	161	6.7	25.3	NA	NA	2	NA	NA	NA	NA	NA	NA	NA	19.8	134	14.78	NA	NA	NA	0.364
110285	4243.400674	4852.517908	2	9	2	NA	NA	NA	NA	NA	NA	NA	NA	NA	NA	NA	NA	NA	NA	NA	NA	NA	NA	NA	NA	NA	NA	NA	NA	20.2	NA	NA	2	NA	NA	NA	NA	NA	NA	NA	5.6	55	10.18	0.08	0.56	3.91	0.186
110286	23711.314	24829.4998	1	43	1	35	4.1	88	20	25	13	101	90	0.81	3.4	6.44	48	101	121	282	3.3	4.7	141	0.5	9.2	191	7.5	121	5.8	31	NA	1	2	6.94	NA	NA	2	1	2	2	13.7	131	10.46	NA	NA	NA	1.067
110287	59177.78225	66031.17056	1	68	3	35	4.4	81	33	24	14	103	115	0.8	3	6.16	38	79	147	282	3.8	4.2	141	0.5	9.1	160	7.4	68	5	26.5	0	1	2	6.61	2	2	2	1	2	2	1.7	48	3.54	NA	NA	NA	1.183
110288	12516.33866	0	1	53	3	NA	NA	NA	NA	NA	NA	NA	NA	NA	NA	NA	NA	NA	NA	NA	NA	NA	NA	NA	NA	NA	NA	NA	NA	NA	NA	1	2	NA	2	2	2	2	2	2	NA	NA	NA	NA	NA	NA	NA
110289	40151.21112	44685.49643	1	36	5	21	4.6	70	20	26	13	98	98	0.99	2.9	5.72	30	98	131	278	3	4.4	139	0.5	9.4	212	7.5	133	6.6	34.8	NA	NA	2	6	NA	NA	2	1	2	2	6.8	131	5.19	NA	NA	NA	0.817
110290	6321.796172	6648.313458	1	63	5	13	4.1	77	19	23	13	103	85	0.98	3.3	4.88	23	85	138	281	3.3	4.4	141	0.9	9.5	223	7.4	93	6	16.4	0	2	2	5.27	2	2	2	2	2	2	4.6	68	6.76	NA	NA	NA	1.229
110291	75838.50914	80797.59378	1	64	3	26	3.9	101	15	26	14	102	52	0.92	3.2	4.94	46	149	128	283	3.3	4.3	142	0.4	9.2	173	7.1	112	5.1	30	NA	2	2	NA	2	2	2	2	2	2	6.5	88	7.39	0.08	0.56	3.7	0.937
110292	11979.40394	14259.27162	1	79	3	60	4.3	86	47	22	18	99	NA	1.11	2.5	9.83	113	54	NA	280	3.4	NA	137	0.2	9.4	183	6.8	1557	6.4	27.8	1	2	1	10.4	2	1	2	2	1	2	29.3	109	26.88	NA	NA	NA	0.958
110293	18019.33703	18720.25644	1	21	1	18	4.2	82	28	29	14	103	326	0.99	2.9	6.16	23	72	172	292	3.7	3.5	146	0.4	9.1	136	7.1	127	6.8	24	NA	NA	2	6.83	NA	NA	2	2	2	2	9.5	100	9.5	NA	NA	NA	0.238
110294	4155.604568	4717.705165	2	14	5	NA	NA	NA	NA	NA	NA	NA	NA	NA	NA	NA	NA	NA	NA	NA	NA	NA	NA	NA	NA	NA	NA	NA	NA	22.3	NA	NA	2	NA	NA	NA	NA	NA	NA	NA	16.5	20	82.5	0.08	0.56	1.01	NA
110295	20323.15629	24589.61382	2	77	3	32	3.9	68	22	26	19	103	183	0.84	3	5.22	21	81	213	283	3.1	4.7	141	0.4	9.2	214	6.9	111	4.7	24.8	NA	1	2	5.72	2	2	1	2	2	2	7.1	21	33.81	NA	NA	NA	2.057
110296	12660.40562	13406.04922	1	48	4	18	4.3	61	18	23	10	101	186	0.85	3	4.39	21	92	114	276	4.2	3.9	139	0.4	9.7	215	7.3	107	5.2	20.8	NA	2	2	NA	NA	NA	2	2	2	2	3.4	66	5.15	NA	NA	NA	0.522
110297	5571.892465	5738.230764	1	16	4	11	4.5	122	18	26	13	103	629	1.11	2.9	5.11	20	108	166	281	4.4	4.5	141	0.4	9.9	123	7.4	40	5.2	25.1	NA	NA	2	NA	NA	NA	NA	2	NA	NA	15.7	315	4.98	NA	NA	NA	0.183
110298	12767.62734	13044.04657	1	14	3	17	4.6	139	23	26	9	102	248	0.91	3.1	4.88	11	89	164	281	4.1	4.1	142	1.5	9.4	125	7.7	64	5.4	21.8	NA	NA	2	NA	NA	NA	NA	NA	NA	NA	19.1	289	6.61	NA	NA	NA	0.439
110299	4405.222595	0	1	0	1	NA	NA	NA	NA	NA	NA	NA	NA	NA	NA	NA	NA	NA	NA	NA	NA	NA	NA	NA	NA	NA	NA	NA	NA	NA	NA	NA	NA	NA	NA	NA	NA	NA	NA	NA	NA	NA	NA	NA	NA	NA	NA
110300	9014.82623	9713.73163	2	80	1	14	4	65	29	25	15	94	80	0.66	3.1	6.11	25	45	NA	272	3.2	3.9	135	0.5	9.1	166	7.1	80	3.7	14.2	0	2	2	NA	2	2	2	2	2	2	39.9	114	35	NA	NA	NA	NA
110301	7068.38463	7895.415452	1	0	4	NA	NA	NA	NA	NA	NA	NA	NA	NA	NA	NA	NA	NA	NA	NA	NA	NA	NA	NA	NA	NA	NA	NA	NA	NA	NA	NA	NA	NA	NA	NA	NA	NA	NA	NA	NA	NA	NA	NA	NA	NA	NA
110302	8347.86245	8800.160409	2	38	5	NA	NA	NA	NA	NA	NA	NA	NA	NA	NA	NA	NA	NA	NA	NA	NA	NA	NA	NA	NA	NA	NA	NA	NA	19.7	NA	NA	2	NA	NA	NA	2	2	1	2	2.1	48	4.38	NA	NA	NA	2.537
110303	17636.27043	18710.03828	1	7	3	NA	NA	NA	NA	NA	NA	NA	NA	NA	NA	NA	NA	NA	NA	NA	NA	NA	NA	NA	NA	NA	NA	NA	NA	14.5	NA	NA	2	NA	NA	NA	NA	NA	NA	NA	19.5	123	15.85	NA	NA	NA	0.376
110304	14714.83951	16243.63553	1	36	5	58	3.7	126	29	22	11	102	84	0.74	3.6	9.55	69	105	133	281	2.8	4.2	139	0.3	8.6	215	7.3	194	5.5	34.2	NA	NA	2	10.2	NA	NA	2	2	2	2	2.9	37	7.84	1.14	0.56	21.22	NA
110305	17216.55272	17869.22374	2	19	1	17	4.5	51	18	19	8	100	108	0.79	2.8	4.77	9	117	157	271	4.5	3.4	137	0.8	9.4	160	7.3	57	6.6	20.8	NA	NA	2	5.22	NA	NA	NA	2	NA	NA	64.4	111	58.02	NA	NA	NA	0.084
110306	6896.730897	7284.665839	2	53	4	62	3.5	155	83	26	12	100	71	0.71	5.1	7.72	282	76	150	276	4.1	4.3	137	0.4	9.3	124	8.6	74	4.9	61.7	0	2	2	8.49	2	2	2	1	2	2	5.8	154	3.77	0.08	0.56	6.41	0.829
110307	25213.03443	27895.69211	1	27	3	22	3.8	95	NA	25	14	106	128	0.86	2.6	5.11	19	152	NA	283	3.3	4.2	142	0.4	9	127	6.4	78	5.2	23.6	NA	NA	2	5.5	NA	NA	2	2	1	2	4.6	121	3.8	NA	NA	NA	1.054
110308	25450.03226	29763.67692	2	80	3	10	3.5	63	18	28	27	99	47	0.9	2.6	5.11	9	16	163	282	3.7	4.6	139	0.3	9.1	208	6.1	60	4.3	NA	NA	1	2	NA	1	1	2	1	2	1	6.4	29	22.07	0.08	0.56	1.42	1.4
110309	13043.40606	13930.06843	1	19	3	23	4.6	80	19	28	12	101	170	1.03	2.9	4.88	11	110	139	282	3.8	4.3	142	0.8	9.9	131	7.5	114	5.6	24.5	NA	NA	2	NA	NA	NA	NA	2	NA	NA	6.6	215	3.07	0.73	0.56	6.01	0.527
110310	30316.08036	33065.08906	2	74	2	9	4	100	19	25	14	102	83	0.73	3.1	5.11	9	63	185	285	4.3	4.1	143	0.2	9.1	201	7.1	119	3.7	34.6	0	2	2	NA	2	2	2	2	2	2	4.2	37	11.35	0.08	0.56	3.22	1.951
110311	67230.70824	74573.45255	2	79	3	17	4.2	43	31	25	22	100	63	0.79	3.3	4.88	10	110	165	278	3.6	4.3	138	0.5	9.7	130	7.5	68	3.6	22.3	0	2	2	NA	2	2	2	2	2	2	8.5	57	14.91	NA	NA	NA	1.493
110312	36625.36768	38720.21185	2	17	1	7	3.8	68	17	22	10	101	68	0.55	2.9	4.66	6	70	119	281	4.7	3.5	142	0.4	9.3	168	6.7	64	3.8	26.1	NA	NA	2	NA	NA	NA	NA	1	NA	NA	4.2	114	3.68	NA	NA	NA	NA
110313	4504.846936	4765.178576	2	10	5	NA	NA	NA	NA	NA	NA	NA	NA	NA	NA	NA	NA	NA	NA	NA	NA	NA	NA	NA	NA	NA	NA	NA	NA	16.4	NA	NA	2	NA	NA	NA	NA	NA	NA	NA	12.9	134	9.63	NA	NA	NA	1.364
110314	4923.434715	5302.176488	2	37	4	13	4.3	69	17	23	10	100	300	0.63	3.9	5.16	13	129	159	271	3.1	3.5	136	0.6	9.5	165	8.2	68	3.8	36.9	NA	NA	2	NA	NA	NA	2	1	2	2	13.9	225	6.18	0.08	0.56	33.7	1.071
110315	7673.252127	8022.091739	2	18	4	7	3	102	11	22	7	103	64	0.51	3	4.05	5	39	159	276	2.9	3.7	140	0.3	8.9	204	6	91	2.7	NA	NA	NA	2	4.66	NA	NA	NA	1	NA	NA	14.9	179	8.32	NA	NA	NA	0.462
110316	15149.11168	16864.4246	2	10	3	NA	NA	NA	NA	NA	NA	NA	NA	NA	NA	NA	NA	NA	NA	NA	NA	NA	NA	NA	NA	NA	NA	NA	NA	26.4	NA	NA	2	NA	NA	NA	NA	NA	NA	NA	63.7	83	76.75	NA	NA	NA	NA
110317	10029.0028	10341.06588	2	64	4	14	4.2	79	18	28	12	100	125	0.7	3.4	4.44	22	61	160	278	3.5	3.9	140	0.3	9.7	263	7.6	73	4.8	26.3	0	2	2	NA	2	2	2	2	1	2	2.2	26	8.46	NA	NA	NA	NA
110318	7307.137126	7850.989831	1	61	4	28	4.2	73	24	25	10	105	202	0.78	3.1	5.22	29	106	140	284	4	4.2	143	0.4	9.2	167	7.3	60	5.4	27.2	1	2	2	5.61	2	2	2	2	2	2	15.7	226	6.95	NA	NA	NA	0.388
110319	14144.64839	15041.02673	2	34	1	23	3.8	102	19	27	11	101	75	0.67	3	4.72	27	100	139	278	3.3	4	140	0.8	8.6	141	6.8	71	3.8	32.1	NA	NA	2	5.05	NA	NA	2	2	2	2	8.5	216	3.94	NA	NA	NA	0.484
110320	17882.28672	0	2	5	3	NA	NA	NA	NA	NA	NA	NA	NA	NA	NA	NA	NA	NA	NA	NA	NA	NA	NA	NA	NA	NA	NA	NA	NA	NA	NA	NA	2	NA	NA	NA	NA	NA	NA	NA	NA	NA	NA	NA	NA	NA	NA
110321	25859.08039	27140.73706	1	46	3	13	4.2	91	16	28	9	100	97	1.15	2.7	5.27	27	90	146	282	4.5	3.7	142	1.1	9.2	167	6.9	237	5.7	31.3	NA	2	2	5.72	NA	NA	2	2	2	2	3.8	174	2.18	NA	NA	NA	0.227
110322	13253.83894	14005.44606	1	46	3	19	4.5	93	21	25	13	98	193	0.98	3.2	4.88	21	64	153	275	4.2	3.6	138	0.8	9.6	232	7.7	210	8.5	30.2	NA	1	2	NA	NA	NA	2	2	2	2	10.1	150	6.73	NA	NA	NA	NA
110323	46841.77305	52637.81525	2	48	3	15	4.6	59	19	27	9	102	353	0.84	3.3	4.61	21	56	185	277	3.1	3.9	140	0.4	9.4	210	7.9	98	4.9	30.4	NA	2	2	5.11	NA	NA	2	2	2	2	1.5	40	3.75	NA	NA	NA	0.482
110324	4649.262924	4998.311378	1	10	5	NA	NA	NA	NA	NA	NA	NA	NA	NA	NA	NA	NA	NA	NA	NA	NA	NA	NA	NA	NA	NA	NA	NA	NA	28.4	NA	NA	2	NA	NA	NA	NA	NA	NA	NA	8.7	137	6.35	NA	NA	NA	0.746
110325	14556.97102	15020.32841	2	0	3	NA	NA	NA	NA	NA	NA	NA	NA	NA	NA	NA	NA	NA	NA	NA	NA	NA	NA	NA	NA	NA	NA	NA	NA	NA	NA	NA	NA	NA	NA	NA	NA	NA	NA	NA	NA	NA	NA	NA	NA	NA	NA
110326	73292.63208	77748.4078	1	39	2	24	4.4	56	18	28	16	102	135	1.19	3.1	4.88	20	92	118	287	3.5	3.9	144	1	9.2	193	7.5	131	6	28.9	NA	NA	2	NA	NA	NA	2	2	2	2	1.6	83	1.93	0.08	0.56	2.11	1.751
110327	5514.721622	5934.178822	2	11	4	NA	NA	NA	NA	NA	NA	NA	NA	NA	NA	NA	NA	NA	NA	NA	NA	NA	NA	NA	NA	NA	NA	NA	NA	27.4	NA	NA	2	NA	NA	NA	NA	NA	NA	NA	10.8	206	5.24	NA	NA	NA	NA
110328	62587.90788	71886.80183	1	63	3	10	4	65	18	26	15	104	223	1.19	3	5	22	124	173	280	3	4.2	140	0.8	9.2	182	7	73	5.6	27.8	0	2	2	5.38	2	2	2	2	2	2	6.9	255	2.71	NA	NA	NA	0.26
110329	9700.618933	11153.02796	1	80	3	14	3.7	124	18	25	27	99	39	1.29	3	4.66	101	44	189	276	3.9	5.1	136	0.8	10	97	6.7	105	5.9	29.5	1	1	2	NA	2	1	1	2	2	1	14.7	77	19.09	0.08	0.56	3.99	0.612
110330	7090.855688	7535.219795	1	16	5	12	4.1	248	16	25	12	103	130	0.68	2.5	4.66	11	94	199	286	4.9	4.1	144	0.8	9.7	132	6.6	76	5.5	22.7	NA	NA	2	NA	NA	NA	NA	2	NA	NA	36.1	243	14.86	NA	NA	NA	NA
110331	16201.181	18660.18223	1	8	4	NA	NA	NA	NA	NA	NA	NA	NA	NA	NA	NA	NA	NA	NA	NA	NA	NA	NA	NA	NA	NA	NA	NA	NA	NA	NA	NA	2	NA	NA	NA	NA	NA	NA	NA	21.3	84	25.36	0.08	0.56	6.63	NA
110332	12504.6603	14393.23758	2	49	4	17	3.7	94	20	28	10	101.7	88	0.89	3.5	5.11	40	70	142	284	3.2	3.6	143	0.5	9.3	191	7.2	77	6.1	46.2	NA	1	2	5.38	NA	NA	2	1	2	2	3.3	110	3	NA	NA	NA	0.228
110333	7979.095224	0	1	0	1	NA	NA	NA	NA	NA	NA	NA	NA	NA	NA	NA	NA	NA	NA	NA	NA	NA	NA	NA	NA	NA	NA	NA	NA	NA	NA	NA	NA	NA	NA	NA	NA	NA	NA	NA	NA	NA	NA	NA	NA	NA	NA
110334	46255.14784	51518.83025	1	3	3	NA	NA	NA	NA	NA	NA	NA	NA	NA	NA	NA	NA	NA	NA	NA	NA	NA	NA	NA	NA	NA	NA	NA	NA	16.5	NA	NA	2	NA	NA	NA	NA	NA	NA	NA	NA	NA	NA	NA	NA	NA	NA
110335	23384.74015	27009.54935	1	3	1	NA	NA	NA	NA	NA	NA	NA	NA	NA	NA	NA	NA	NA	NA	NA	NA	NA	NA	NA	NA	NA	NA	NA	NA	16	NA	NA	2	NA	NA	NA	NA	NA	NA	NA	12.4	64	19.38	0.78	0.56	5.78	NA
110336	180881.596	195271.9109	2	61	3	12	4.2	79	17	28	22	96	68	0.68	3.1	5.83	16	98	167	279	3.5	4	138	0.7	9.6	239	7.3	99	2.8	25.4	1	2	2	6.22	2	2	1	2	2	2	2.2	58	3.79	0.08	0.56	10.46	0.919
110337	1241.066032	1371.440366	1	2	5	NA	NA	NA	NA	NA	NA	NA	NA	NA	NA	NA	NA	NA	NA	NA	NA	NA	NA	NA	NA	NA	NA	NA	NA	17.1	NA	NA	2	NA	NA	NA	NA	NA	NA	NA	NA	NA	NA	NA	NA	NA	NA
110338	26016.49297	30460.69334	1	8	3	NA	NA	NA	NA	NA	NA	NA	NA	NA	NA	NA	NA	NA	NA	NA	NA	NA	NA	NA	NA	NA	NA	NA	NA	15.7	NA	NA	2	NA	NA	NA	NA	NA	NA	NA	23.5	68	34.56	0.08	0.56	5.21	NA
110339	39188.45228	0	2	79	3	NA	NA	NA	NA	NA	NA	NA	NA	NA	NA	NA	NA	NA	NA	NA	NA	NA	NA	NA	NA	NA	NA	NA	NA	NA	NA	2	2	NA	1	2	1	2	2	2	NA	NA	NA	NA	NA	NA	NA
110340	19468.64315	21918.54009	2	4	2	NA	NA	NA	NA	NA	NA	NA	NA	NA	NA	NA	NA	NA	NA	NA	NA	NA	NA	NA	NA	NA	NA	NA	NA	22.7	NA	NA	2	NA	NA	NA	NA	NA	NA	NA	7	62	11.29	0.08	0.56	5.39	NA
110341	23258.55609	25655.36438	1	49	5	18	3.8	59	29	25	17	105	494	1.13	3.2	5.16	11	37	230	282	2.7	4	141	0.2	9.1	193	7	217	6.6	24.5	NA	2	2	5.5	NA	NA	2	2	2	2	3.1	27	11.48	NA	NA	NA	0.851
110342	13055.58064	13446.92655	2	34	4	7	4	67	14	25	8	100	89	0.96	3	4.94	8	58	124	272	2.6	3.9	137	0.2	9.1	168	7	38	4.4	31.9	NA	NA	2	NA	NA	NA	2	1	2	2	13.6	394	3.45	NA	NA	NA	0.263
110343	14453.6281	15578.75709	2	9	1	NA	NA	NA	NA	NA	NA	NA	NA	NA	NA	NA	NA	NA	NA	NA	NA	NA	NA	NA	NA	NA	NA	NA	NA	18.2	NA	NA	2	NA	NA	NA	NA	NA	NA	NA	4	55	7.27	0.13	0.56	3.74	0.356
110344	15370.12199	0	2	66	5	NA	NA	NA	NA	NA	NA	NA	NA	NA	NA	NA	NA	NA	NA	NA	NA	NA	NA	NA	NA	NA	NA	NA	NA	NA	NA	1	1	NA	2	1	2	1	2	1	NA	NA	NA	NA	NA	NA	NA
110345	5902.314078	6964.944601	2	14	5	16	4.2	108	19	23	10	101	110	0.83	2.9	5.05	7	74	166	278	5	4.3	140	0.3	9.2	165	7.1	87	4.7	21.7	NA	NA	2	NA	NA	NA	NA	NA	NA	NA	3.4	88	3.86	0.57	0.56	7.43	0.765
110346	8455.381223	9687.152137	1	4	3	NA	NA	NA	NA	NA	NA	NA	NA	NA	NA	NA	NA	NA	NA	NA	NA	NA	NA	NA	NA	NA	NA	NA	NA	17.7	NA	NA	2	NA	NA	NA	NA	NA	NA	NA	5.5	43	12.79	0.08	0.56	1.14	NA
110347	10628.29001	12003.41133	1	32	5	54	4.3	64	29	24	17	103	95	0.9	3.1	5.16	91	55	141	284	3.9	3.9	142	0.3	9.1	224	7.4	97	6.2	30.3	NA	NA	2	5.33	NA	NA	2	2	2	2	2.5	49	5.1	0.08	0.56	3.44	1.125
110348	12311.16305	13965.82656	1	2	3	NA	NA	NA	NA	NA	NA	NA	NA	NA	NA	NA	NA	NA	NA	NA	NA	NA	NA	NA	NA	NA	NA	NA	NA	16.9	NA	NA	2	NA	NA	NA	NA	NA	NA	NA	NA	NA	NA	NA	NA	NA	NA
110349	10988.02675	12563.36799	2	2	3	NA	NA	NA	NA	NA	NA	NA	NA	NA	NA	NA	NA	NA	NA	NA	NA	NA	NA	NA	NA	NA	NA	NA	NA	17.3	NA	NA	2	NA	NA	NA	NA	NA	NA	NA	NA	NA	NA	NA	NA	NA	NA
110350	5921.890584	6053.655254	2	67	1	18	3.7	66	17	25	9	103	62	0.54	3.6	6.22	13	72	130	284	3.2	3.5	143	0.5	9.1	207	7.3	99	3.3	35.7	0	1	2	NA	2	2	2	1	1	2	13	97	13.4	NA	NA	NA	0.478
110351	41887.94713	47195.67216	1	49	3	22	4.6	64	21	25	16	96	168	0.72	3.1	4.94	65	80	165	278	2.5	3.8	139	0.6	9.4	265	7.7	93	4.6	29.1	NA	2	2	NA	NA	NA	1	2	1	2	16.7	68	24.56	0.27	0.56	3.48	NA
110352	6861.746698	7240.298637	1	18	4	19	3.9	108	11	22	11	101	116	0.82	3.6	8.72	30	51	160	280	4.3	4	139	0.2	9.4	130	7.5	89	5.2	48.7	NA	NA	2	9.1	NA	NA	NA	1	NA	NA	60.6	446	13.59	NA	NA	NA	0.275
110353	7160.655075	7000.844099	1	71	5	12	4.1	70	14	27	9	104	277	1.04	2.8	7.66	28	103	183	282	3.1	4.2	141	0.4	9.3	293	6.9	106	5.1	26.7	1	2	2	8.05	2	2	2	2	2	2	55.7	80	69.63	NA	NA	NA	1.179
110354	2407.202671	2814.133777	1	10	4	NA	NA	NA	NA	NA	NA	NA	NA	NA	NA	NA	NA	NA	NA	NA	NA	NA	NA	NA	NA	NA	NA	NA	NA	29	NA	NA	2	NA	NA	NA	NA	NA	NA	NA	12.2	94	12.98	0.08	0.56	2.9	0.64
110355	10992.60458	0	2	32	4	NA	NA	NA	NA	NA	NA	NA	NA	NA	NA	NA	NA	NA	NA	NA	NA	NA	NA	NA	NA	NA	NA	NA	NA	NA	NA	NA	2	NA	NA	NA	2	2	2	2	NA	NA	NA	NA	NA	NA	NA
110356	26521.32694	29445.82371	1	43	2	24	4.1	67	23	25	17	105	124	0.91	2.8	3.77	29	100	141	287	4	3.6	144	0.2	9	211	6.9	507	4.2	23.6	NA	1	3	NA	NA	NA	2	2	2	2	6.9	151	4.57	1.28	0.56	15.69	0.829
110357	14073.2112	15955.52751	2	6	3	NA	NA	NA	NA	NA	NA	NA	NA	NA	NA	NA	NA	NA	NA	NA	NA	NA	NA	NA	NA	NA	NA	NA	NA	21.4	NA	NA	2	NA	NA	NA	NA	NA	NA	NA	26.5	127	20.87	0.81	0.56	9.19	0.085
110358	6847.993092	0	1	7	4	NA	NA	NA	NA	NA	NA	NA	NA	NA	NA	NA	NA	NA	NA	NA	NA	NA	NA	NA	NA	NA	NA	NA	NA	NA	NA	NA	2	NA	NA	NA	NA	NA	NA	NA	NA	NA	NA	NA	NA	NA	NA
110359	3941.065039	4073.067624	2	65	4	26	3.9	84	31	23	19	106	88	0.86	2.6	6.77	41	53	152	287	3.8	4.9	142	0.4	9.6	196	6.5	288	9.3	36.1	1	2	1	7.22	2	2	2	1	2	2	25.5	146	17.47	NA	NA	NA	0.478
110360	25484.42328	25999.22648	2	13	3	9	4.4	160	15	26	9	102	139	0.5	2.9	5.05	9	53	173	280	4.2	3.9	141	0.4	9.5	135	7.3	53	4	28	NA	NA	2	NA	NA	NA	NA	NA	NA	NA	1	25	4	NA	NA	NA	2.347
110361	1888.943123	2118.282981	1	0	5	NA	NA	NA	NA	NA	NA	NA	NA	NA	NA	NA	NA	NA	NA	NA	NA	NA	NA	NA	NA	NA	NA	NA	NA	NA	NA	NA	NA	NA	NA	NA	NA	NA	NA	NA	NA	NA	NA	NA	NA	NA	NA
110362	3226.994462	3337.781654	2	0	4	NA	NA	NA	NA	NA	NA	NA	NA	NA	NA	NA	NA	NA	NA	NA	NA	NA	NA	NA	NA	NA	NA	NA	NA	NA	NA	NA	NA	NA	NA	NA	NA	NA	NA	NA	NA	NA	NA	NA	NA	NA	NA
110363	9249.968653	0	1	3	5	NA	NA	NA	NA	NA	NA	NA	NA	NA	NA	NA	NA	NA	NA	NA	NA	NA	NA	NA	NA	NA	NA	NA	NA	NA	NA	NA	2	NA	NA	NA	NA	NA	NA	NA	NA	NA	NA	NA	NA	NA	NA
110364	16749.96019	18038.51169	2	6	1	NA	NA	NA	NA	NA	NA	NA	NA	NA	NA	NA	NA	NA	NA	NA	NA	NA	NA	NA	NA	NA	NA	NA	NA	19.9	NA	NA	2	NA	NA	NA	NA	NA	NA	NA	1.8	19	9.47	0.08	0.56	0.9	NA
110365	10470.83998	11132.0325	2	8	1	NA	NA	NA	NA	NA	NA	NA	NA	NA	NA	NA	NA	NA	NA	NA	NA	NA	NA	NA	NA	NA	NA	NA	NA	24.4	NA	NA	2	NA	NA	NA	NA	NA	NA	NA	55.6	63	88.25	NA	NA	NA	NA
110366	3329.81347	3449.55841	1	61	4	20	3.8	79	18	24	13	103	231	0.9	3.6	5.33	32	149	149	279	3	4.9	140	0.7	9.1	197	7.4	117	4.5	19.9	0	1	2	5.66	2	2	2	2	2	2	6.6	82	8.05	NA	NA	NA	1.67
110367	17660.99031	19430.25263	1	18	1	52	4.6	71	192	26	13	101	15425	0.87	2.7	5	10	101	567	277	3.4	4.3	139	0.6	9.6	151	7.3	45	3.8	18.2	NA	NA	2	5.5	NA	NA	NA	2	NA	NA	20.4	108	18.89	NA	NA	NA	1.064
110368	19286.6152	21670.68483	2	80	4	8	3.8	106	13	25	15	99	108	0.89	3.9	5.05	14	33	150	278	3.4	3.3	139	0.4	9.9	158	7.7	76	5.6	30.3	1	2	2	5.38	2	2	2	2	2	2	17.2	101	17.03	NA	NA	NA	0.524
110369	1925.049912	2129.993249	1	0	5	NA	NA	NA	NA	NA	NA	NA	NA	NA	NA	NA	NA	NA	NA	NA	NA	NA	NA	NA	NA	NA	NA	NA	NA	NA	NA	NA	NA	NA	NA	NA	NA	NA	NA	NA	NA	NA	NA	NA	NA	NA	NA
110370	5328.960234	0	1	4	4	NA	NA	NA	NA	NA	NA	NA	NA	NA	NA	NA	NA	NA	NA	NA	NA	NA	NA	NA	NA	NA	NA	NA	NA	NA	NA	NA	2	NA	NA	NA	NA	NA	NA	NA	NA	NA	NA	NA	NA	NA	NA
110371	4417.408766	4972.226202	1	1	4	NA	NA	NA	NA	NA	NA	NA	NA	NA	NA	NA	NA	NA	NA	NA	NA	NA	NA	NA	NA	NA	NA	NA	NA	NA	NA	NA	2	NA	NA	NA	NA	NA	NA	NA	NA	NA	NA	NA	NA	NA	NA
110372	6076.210785	7053.932286	1	78	3	21	3.8	83	16	18	34	89	40	1.44	3.6	27.14	25	97	NA	285	3.6	4.7	127	0.4	9.5	254	7.4	741	5.6	31.8	0	1	1	NA	2	9	1	1	1	2	283	38	744.74	0.08	0.56	0.8	2.729
110373	5202.580114	0	1	7	4	NA	NA	NA	NA	NA	NA	NA	NA	NA	NA	NA	NA	NA	NA	NA	NA	NA	NA	NA	NA	NA	NA	NA	NA	NA	NA	NA	2	NA	NA	NA	NA	NA	NA	NA	NA	NA	NA	NA	NA	NA	NA
110374	6179.481001	6619.354887	2	45	4	16	3.7	100	20	26	17	105	490	0.9	3.7	5.16	14	44	230	294	4.4	4.2	147	0.1	9	154	7.4	185	4.7	49.7	NA	1	2	NA	NA	NA	2	1	2	2	7	133	5.26	NA	NA	NA	NA
110375	5461.887336	5909.925878	2	6	4	NA	NA	NA	NA	NA	NA	NA	NA	NA	NA	NA	NA	NA	NA	NA	NA	NA	NA	NA	NA	NA	NA	NA	NA	16.7	NA	NA	2	NA	NA	NA	NA	NA	NA	NA	23.7	121	19.59	NA	NA	NA	NA
110376	30573.71337	32458.44638	2	37	1	12	3.1	32	19	20	6	103	50	0.52	1.3	4.66	32	54	90	267	3.3	4.1	135	0.2	7.2	123	4.4	72	3.9	23.9	NA	NA	2	NA	NA	NA	2	2	2	2	6.7	63	10.63	0.08	0.56	19.65	0.71
110377	11032.67144	13079.81257	2	80	3	12	3.8	54	21	27	21	99	77	1.05	3	4.94	11	54	147	274	4.2	4.6	136	0.2	9	152	6.8	220	3.3	24.6	0	2	2	NA	2	2	2	2	2	2	3.9	29	13.45	NA	NA	NA	0.61
110378	5295.158993	5282.168664	2	44	1	12	3.6	83	13	24	7	101	63	0.55	3	5.38	11	28	135	275	3	4.1	139	0.3	8.7	180	6.6	112	5	49.1	NA	2	2	5.72	NA	NA	2	1	2	2	22.9	141	16.24	0.08	0.56	17.19	0.637
110379	43474.82179	45892.41318	2	20	3	13	4.1	42	16	25	10	101	68	0.78	3.2	4.55	10	167	139	279	3.9	4.6	141	0.4	9.3	183	7.3	94	4.1	23.4	NA	NA	2	4.94	NA	NA	2	2	2	2	10.5	244	4.3	NA	NA	NA	0.241
110380	6570.924869	6880.42705	1	21	4	8	4.4	61	17	22	12	103	308	1.35	3	4.5	30	119	145	287	3.7	4	145	0.5	9.5	152	7.4	81	5.9	18.2	NA	NA	2	NA	NA	NA	2	2	2	2	11.3	411	2.75	NA	NA	NA	0.367
110381	27042.92891	28743.18069	2	40	5	11	3.6	89	12	29	13	100	61	0.84	3.7	4.22	16	49	167	280	4	4.3	141	0.2	9.4	178	7.3	99	5.6	42.8	NA	2	2	4.88	NA	NA	2	1	1	9	2.5	68	3.68	0.08	0.56	1.54	0.227
110382	23626.50678	0	1	38	1	NA	NA	NA	NA	NA	NA	NA	NA	NA	NA	NA	NA	NA	NA	NA	NA	NA	NA	NA	NA	NA	NA	NA	NA	NA	NA	NA	2	NA	NA	NA	2	2	2	2	NA	NA	NA	NA	NA	NA	NA
110383	12304.14031	14439.51314	1	1	4	NA	NA	NA	NA	NA	NA	NA	NA	NA	NA	NA	NA	NA	NA	NA	NA	NA	NA	NA	NA	NA	NA	NA	NA	NA	NA	NA	2	NA	NA	NA	NA	NA	NA	NA	NA	NA	NA	NA	NA	NA	NA
110384	8847.067236	9419.202755	1	80	4	11	4.1	60	15	27	14	103	178	1.3	3.3	5.11	13	32	184	280	3	3.9	140	0.5	9	158	7.4	56	4.6	28.6	0	1	2	5.27	2	2	2	1	2	2	34	133	25.56	0.08	0.56	3.43	0.716
110385	23642.33775	25465.05637	1	36	4	21	4	47	17	26	14	101	245	1.25	3.1	4.72	28	112	168	277	2.9	4.1	139	0.6	9.2	218	7.1	69	5.7	24.6	NA	NA	2	5.16	NA	NA	2	2	2	2	5.7	297	1.92	NA	NA	NA	0.177
110386	36512.13187	39582.99228	2	75	3	9	3.9	85	18	30	12	96	52	1.01	3	4.66	14	98	136	273	3.2	4.2	137	0.3	9.7	163	6.9	189	5.8	25.9	1	2	2	NA	2	2	1	2	2	2	19.5	144	13.54	NA	NA	NA	0.392
110387	9119.01838	9804.242201	1	54	5	27	4.1	90	21	25	25	99	203	1.18	3.4	5.11	33	69	176	283	3.2	4.4	140	0.2	9.3	161	7.5	226	6.8	42.8	0	1	1	NA	2	2	2	1	2	2	1023	98	1043.88	NA	NA	NA	0.714
110388	19436.07649	23163.15392	1	1	3	NA	NA	NA	NA	NA	NA	NA	NA	NA	NA	NA	NA	NA	NA	NA	NA	NA	NA	NA	NA	NA	NA	NA	NA	NA	NA	NA	2	NA	NA	NA	NA	NA	NA	NA	NA	NA	NA	NA	NA	NA	NA
110389	27039.05466	29671.86425	1	70	3	17	4.3	60	20	26	18	101	288	0.98	2.7	5.66	13	112	187	287	3.2	3.8	143	0.9	9.3	175	7	76	5.2	25.5	1	2	2	6.16	2	2	2	2	1	2	12.5	260	4.81	NA	NA	NA	0.254
110390	10859.3071	11215.84263	1	61	2	26	4.3	63	23	25	18	99	294	0.9	3	6.61	52	121	175	275	2.8	3.8	136	0.5	9.2	311	7.3	84	4.1	30.1	0	2	2	7.05	2	2	2	1	2	2	4.7	45	10.44	0.08	0.56	12.04	3.284
110391	11367.7057	12092.70198	2	33	1	10	4.1	48	12	25	12	106	58	0.61	2.4	4.44	12	89	106	284	3.8	4.3	143	0.8	9.1	170	6.5	60	3.9	26.2	NA	NA	2	4.83	NA	NA	2	1	2	2	1.4	22	6.36	0.08	0.87	30.96	2.243
110392	4485.667647	4794.793828	1	15	4	NA	NA	NA	NA	NA	NA	NA	NA	NA	NA	NA	NA	NA	NA	NA	NA	NA	NA	NA	NA	NA	NA	NA	NA	20.4	NA	NA	2	5.22	NA	NA	NA	NA	NA	NA	6	165	3.64	NA	NA	NA	1.169
110393	8506.807188	8936.799405	2	8	4	NA	NA	NA	NA	NA	NA	NA	NA	NA	NA	NA	NA	NA	NA	NA	NA	NA	NA	NA	NA	NA	NA	NA	NA	13.5	NA	NA	2	NA	NA	NA	NA	NA	NA	NA	20.6	145	14.21	NA	NA	NA	NA
110394	45141.71663	48996.64842	1	40	2	15	4.6	75	15	23	17	102	103	0.8	2.9	4.77	15	83	183	282	3.6	3.7	141	1.5	9.2	173	7.5	100	5.1	24.4	NA	2	2	NA	NA	NA	2	2	2	2	1.2	39	3.08	0.08	0.56	2.9	3.207
110395	15221.56959	17053.45486	2	0	3	NA	NA	NA	NA	NA	NA	NA	NA	NA	NA	NA	NA	NA	NA	NA	NA	NA	NA	NA	NA	NA	NA	NA	NA	NA	NA	NA	NA	NA	NA	NA	NA	NA	NA	NA	NA	NA	NA	NA	NA	NA	NA
110396	25261.7577	26236.72383	1	47	1	21	4.1	81	15	24	13	105	212	0.93	3	5.38	26	94	158	283	3.4	4.1	142	0.5	9.3	262	7.1	130	7	29	NA	2	2	6.11	NA	NA	2	1	2	2	5.9	143	4.13	NA	NA	NA	0.621
110397	9627.856308	10268.46852	1	64	5	NA	NA	NA	NA	NA	NA	NA	NA	NA	NA	NA	NA	NA	NA	NA	NA	NA	NA	NA	NA	NA	NA	NA	NA	28.9	1	2	2	NA	2	2	2	2	2	2	36.5	72	50.69	0.08	0.56	12.35	1.287
110398	29912.91311	0	1	14	3	NA	NA	NA	NA	NA	NA	NA	NA	NA	NA	NA	NA	NA	NA	NA	NA	NA	NA	NA	NA	NA	NA	NA	NA	NA	NA	NA	2	NA	NA	NA	NA	NA	NA	NA	NA	NA	NA	NA	NA	NA	NA
110399	40126.247	42967.04487	1	36	5	49	4.5	85	42	26	13	99	106	0.93	2.5	4.61	42	88	122	275	3.9	3.6	138	0.3	9.4	242	7	268	5	18.1	NA	NA	2	5	NA	NA	2	2	2	2	11.8	249	4.74	NA	NA	NA	0.36
110400	12687.0377	13409.7372	1	44	2	44	4.2	66	28	24	20	102	236	0.87	3.1	5.38	33	102	144	282	3.2	4.2	140	1.4	9.2	205	7.3	138	5.5	37.2	NA	2	2	6.05	NA	NA	2	1	2	2	11	183	6.01	NA	NA	NA	0.7
110401	11966.90695	11895.91892	2	48	1	NA	NA	NA	NA	NA	NA	NA	NA	NA	NA	NA	NA	NA	NA	NA	NA	NA	NA	NA	NA	NA	NA	NA	NA	34.5	NA	2	2	NA	NA	NA	2	1	1	2	2800	131	2137.4	NA	NA	NA	0.694
110402	9293.670428	9388.295021	1	50	4	14	3.6	65	19	25	21	105	160	1.17	3.3	5.44	20	84	136	288	3.1	4.3	143	0.3	8.9	207	6.9	88	7.3	34.7	NA	2	2	5.88	2	1	2	2	1	2	19.9	175	11.37	NA	NA	NA	NA
110403	21856.64319	25276.34494	2	12	5	NA	NA	NA	NA	NA	NA	NA	NA	NA	NA	NA	NA	NA	NA	NA	NA	NA	NA	NA	NA	NA	NA	NA	NA	20.3	NA	NA	2	NA	NA	NA	NA	NA	NA	NA	31	237	13.08	NA	NA	NA	0.904
110404	6669.695955	7081.3116	1	14	5	16	4.5	494	22	24	16	100	140	0.54	2.9	5	14	121	194	278	5.1	5	139	0.4	10	194	7.4	109	5.3	21.7	NA	NA	2	NA	NA	NA	NA	NA	NA	NA	3.7	45	8.22	NA	NA	NA	1.369
110405	48798.01077	48976.48476	1	52	2	21	3.8	114	17	25	19	99	110	1.23	3.6	4.77	20	79	197	283	3.9	3.5	141	0.6	8.8	162	7.4	204	5	30.6	1	2	2	NA	2	2	2	2	2	2	22.3	74	30.14	NA	NA	NA	0.703
110406	8407.237604	8515.308619	2	31	4	10	3.3	89	13	23	9	107	76	0.7	3.8	5.16	19	35	183	278	3	3.9	140	0.3	8.8	193	7.1	81	4.6	51.9	NA	NA	2	5.38	NA	NA	2	1	2	2	14.9	316	4.72	NA	NA	NA	0.324
110407	29931.33477	0	1	11	3	NA	NA	NA	NA	NA	NA	NA	NA	NA	NA	NA	NA	NA	NA	NA	NA	NA	NA	NA	NA	NA	NA	NA	NA	NA	NA	NA	2	NA	NA	NA	NA	NA	NA	NA	NA	NA	NA	NA	NA	NA	NA
110408	21941.80533	23461.20443	2	35	4	9	3.9	49	13	26	12	104	101	0.88	2.9	5.11	21	53	134	281	3	4	141	0.5	9.3	213	6.8	106	4	25.2	NA	NA	2	NA	NA	NA	2	2	2	2	2	31	6.45	0.08	0.56	3.96	2.881
110409	55384.51167	54234.7902	2	52	3	13	4.5	63	19	27	10	93	110	0.78	2.5	4.61	25	157	173	263	3.9	3.9	132	0.5	9.3	217	7	135	4.9	27.7	1	2	2	5.11	2	2	2	1	2	2	2.6	42	6.19	0.08	0.56	1.86	1.149
110410	4723.979168	5074.493528	2	65	4	13	3.7	87	15	30	11	93	71	0.82	3.6	13.38	25	77	175	283	4	3.7	138	0.3	9.6	138	7.3	215	5.9	31.5	0	2	1	14.2	2	2	2	1	2	2	14.4	125	11.52	NA	NA	NA	0.361
110411	31158.75081	31742.10583	2	39	3	11	3.4	64	13	21	11	102	73	0.85	3.5	6.38	18	49	126	274	3.3	3.9	137	0.2	8.9	178	6.9	367	4.4	45.1	NA	NA	2	NA	NA	NA	2	1	2	2	6.3	141	4.47	0.08	0.56	4.3	0.973
110412	14476.7746	15830.06828	1	74	1	13	3.4	75	20	23	17	103	154	1.09	3.2	4.77	14	53	143	282	2.8	4.6	141	0.2	8.9	222	6.6	208	5.5	25.7	0	2	2	NA	2	2	2	2	2	2	5.2	127	4.09	NA	NA	NA	0.753
110413	11626.42158	11976.70142	1	3	1	NA	NA	NA	NA	NA	NA	NA	NA	NA	NA	NA	NA	NA	NA	NA	NA	NA	NA	NA	NA	NA	NA	NA	NA	16.8	NA	NA	2	NA	NA	NA	NA	NA	NA	NA	13.8	93	14.84	0.61	0.87	9	NA
110414	11114.87802	11911.42659	1	28	4	35	4.2	86	28	23	17	104	409	1.06	2.9	6.16	18	58	120	283	3.8	4.7	141	0.1	9.7	171	7.1	37	4.6	22.5	NA	NA	2	6.38	NA	NA	2	2	2	2	1.8	82	2.2	0.08	0.56	11.81	1.872
110415	5498.095814	5320.965756	1	50	5	14	4.6	72	20	24	10	97	123	0.98	2.7	6.16	16	119	164	275	3.1	4.1	138	0.6	9.4	155	7.3	125	6.5	26.3	0	2	3	6.61	NA	NA	2	2	2	2	3.7	136	2.72	NA	NA	NA	0.294
110416	4695.230773	5084.940189	2	10	4	NA	NA	NA	NA	NA	NA	NA	NA	NA	NA	NA	NA	NA	NA	NA	NA	NA	NA	NA	NA	NA	NA	NA	NA	21.1	NA	NA	2	NA	NA	NA	NA	NA	NA	NA	7.1	183	3.88	NA	NA	NA	1.862
110417	10145.01898	10701.07626	2	64	1	73	4.2	113	74	22	13	96	336	0.66	2.7	11.32	127	81	222	284	3.6	3.7	139	0.5	9.1	154	6.9	253	6	36.1	NA	2	1	11.8	2	2	2	1	2	2	18.7	117	15.98	NA	NA	NA	0.733
110418	4696.143401	4964.326825	2	62	1	28	2.6	96	29	29	19	99	137	0.92	4.6	15.1	128	81	176	293	3.8	4.1	141	0.2	9.3	172	7.2	108	6.6	37.1	1	1	1	16.2	1	1	2	1	2	1	5350	154	3474.03	NA	NA	NA	0.055
110419	5132.33432	5288.120702	2	35	4	11	3.9	42	13	24	16	105	84	0.77	3	4.94	17	69	113	282	3.3	4.2	141	0.3	8.8	181	6.9	64	4	31.7	NA	NA	2	5.22	NA	NA	2	1	2	2	4.7	90	5.22	0.08	0.56	16.73	0.364
110420	24730.75787	26646.96302	1	16	4	51	4.7	111	33	26	10	103	597	0.92	2.5	4.72	72	79	167	278	3.5	4.1	140	0.2	10.1	222	7.2	174	5.9	28.7	NA	NA	2	NA	NA	NA	NA	1	NA	NA	1.6	52	3.08	NA	NA	NA	NA
110421	21800.20226	23557.29834	2	74	3	10	4.2	79	14	26	15	102	49	0.81	3	5.33	25	96	169	280	3.6	4	140	0.4	9.3	286	7.2	314	3.7	33.5	0	1	1	NA	1	2	2	1	2	2	5.7	89	6.4	NA	NA	NA	0.643
110422	23442.77117	25492.94362	1	47	4	35	4.4	16	24	25	17	101	317	1.23	3.1	5.27	55	104	176	283	4.5	4	141	0.8	9.3	242	7.5	73	8.3	33.5	NA	2	2	NA	NA	NA	2	2	2	2	7.3	259	2.82	NA	NA	NA	1.317
110423	9766.627897	10307.90042	2	9	4	NA	NA	NA	NA	NA	NA	NA	NA	NA	NA	NA	NA	NA	NA	NA	NA	NA	NA	NA	NA	NA	NA	NA	NA	17.9	NA	NA	2	NA	NA	NA	NA	NA	NA	NA	5.1	21	24.29	0.08	0.56	1	1.864
110424	5482.065957	5893.850849	1	0	1	NA	NA	NA	NA	NA	NA	NA	NA	NA	NA	NA	NA	NA	NA	NA	NA	NA	NA	NA	NA	NA	NA	NA	NA	NA	NA	NA	NA	NA	NA	NA	NA	NA	NA	NA	NA	NA	NA	NA	NA	NA	NA
110425	24967.13552	26810.2502	2	31	5	14	3.8	91	14	24	8	100	79	0.45	3.4	6.27	18	33	128	275	3.4	4.1	138	0.3	8.9	181	7.2	291	5.4	27.4	NA	NA	2	6.61	NA	NA	2	1	2	2	2.4	18	13.33	NA	NA	NA	0.23
110426	123056.6477	129942.6562	1	62	3	36	4.3	87	26	26	17	104	169	1.22	3.3	5.05	132	146	163	286	3.7	4.6	143	0.7	9.4	149	7.6	90	6	25.9	0	2	2	5.55	2	2	2	1	2	2	11.2	196	5.71	NA	NA	NA	1
110427	16018.26932	16945.94989	2	28	5	12	3.9	69	11	23	16	103	85	0.74	3.4	5.83	15	99	122	283	3.9	4.3	141	0.6	8.9	135	7.3	115	5.9	33.6	NA	NA	2	5.88	NA	NA	2	2	2	2	18	379	4.75	0.08	0.56	7.38	0.132
110428	8133.025242	8281.509788	1	0	3	NA	NA	NA	NA	NA	NA	NA	NA	NA	NA	NA	NA	NA	NA	NA	NA	NA	NA	NA	NA	NA	NA	NA	NA	NA	NA	NA	NA	NA	NA	NA	NA	NA	NA	NA	NA	NA	NA	NA	NA	NA	NA
110429	36439.65369	41361.36523	2	80	3	10	3.5	48	16	27	11	105	62	0.81	2.8	5.22	6	35	143	282	3.2	4.3	142	0.3	8.7	187	6.3	60	4.9	33.3	NA	2	2	5.38	2	2	1	2	2	2	9.2	85	10.82	NA	NA	NA	0.525
110430	21557.83392	22388.05989	2	46	3	7	4.2	80	13	22	14	102	55	0.9	3.4	4.94	13	170	133	276	4	4.1	138	0.8	9.6	218	7.6	142	5.5	29.5	NA	1	2	NA	NA	NA	2	2	2	2	105.5	371	28.44	NA	NA	NA	0.243
110431	43749.81065	46093.99303	2	65	3	14	4.6	69	26	25	18	96	48	0.75	3	4.61	12	108	167	277	3.7	4.4	138	0.5	9.7	252	7.6	62	3.7	21.4	1	2	2	NA	1	2	2	2	2	2	1.3	17	7.65	0.08	0.56	2.34	4.118
110432	8236.778328	8975.640958	1	16	4	9	4.3	116	17	25	13	104	701	1	2.6	4.55	12	72	187	286	4	4.1	144	0.3	9.3	129	6.9	54	7	26	NA	NA	2	NA	NA	NA	NA	2	NA	NA	27.8	394	7.06	NA	NA	NA	NA
110433	42452.90955	44518.34487	2	15	3	8	4.3	76	14	25	12	98	89	0.82	2.6	4.88	8	116	134	277	4	4	139	0.3	9.8	178	6.9	82	3.5	22.2	NA	NA	2	NA	NA	NA	NA	NA	NA	NA	1	8	12.5	0.08	0.56	0.16	3.875
110434	11399.393	11894.34188	1	53	1	32	4	67	21	28	14	99	710	0.79	2.1	8.6	28	93	152	281	3.1	4.4	139	0.4	9.3	172	6.1	212	8	42.3	0	2	1	9.1	2	2	2	1	2	2	13	100	13	NA	NA	NA	1.049
110435	7924.843101	0	2	10	5	NA	NA	NA	NA	NA	NA	NA	NA	NA	NA	NA	NA	NA	NA	NA	NA	NA	NA	NA	NA	NA	NA	NA	NA	NA	NA	NA	2	NA	NA	NA	NA	NA	NA	NA	NA	NA	NA	NA	NA	NA	NA
110436	10736.11513	12046.23167	2	42	5	NA	NA	NA	NA	NA	NA	NA	NA	NA	NA	NA	NA	NA	NA	NA	NA	NA	NA	NA	NA	NA	NA	NA	NA	20.7	NA	2	2	NA	NA	NA	2	2	2	2	2.8	38	7.37	1.27	0.56	45.24	1.446
110437	5972.112969	7134.855255	2	6	5	NA	NA	NA	NA	NA	NA	NA	NA	NA	NA	NA	NA	NA	NA	NA	NA	NA	NA	NA	NA	NA	NA	NA	NA	19.2	NA	NA	2	NA	NA	NA	NA	NA	NA	NA	16	142	11.27	0.48	0.56	NA	NA
110438	9582.605507	10450.53064	2	61	5	16	4.1	70	22	29	19	102	183	0.57	3.3	5.16	18	54	157	287	3.1	4.1	143	0.2	9.9	285	7.4	93	5.2	33.4	0	2	2	NA	2	2	2	2	2	2	NA	NA	NA	NA	NA	NA	NA
110439	16519.13319	19259.50728	1	7	3	NA	NA	NA	NA	NA	NA	NA	NA	NA	NA	NA	NA	NA	NA	NA	NA	NA	NA	NA	NA	NA	NA	NA	NA	13.6	NA	NA	2	NA	NA	NA	NA	NA	NA	NA	5.3	98	5.41	0.08	0.56	5.45	NA
110440	20837.63812	24164.70825	1	80	3	20	3.9	116	20	29	17	99	66	0.83	3.3	10.38	59	68	172	280	3.4	3.8	137	1.5	9	156	7.2	201	3.4	32.7	1	1	1	NA	2	2	2	1	1	2	209.5	163	128.53	NA	NA	NA	0.372
110441	7283.168444	7972.129723	1	64	4	11	3.5	56	20	24	12	97	278	1.59	3.2	6.05	90	35	161	270	3.8	3.8	135	0.6	8.7	192	6.7	90	4.9	34.8	0	2	1	NA	2	2	2	2	2	2	1585	46	3445.65	NA	NA	NA	1.137
110442	14513.77815	15842.88765	2	38	2	12	4.2	82	15	23	12	104	74	0.57	2.9	11.1	85	84	259	285	2.7	3.8	140	0.4	9.4	169	7.1	337	4.6	28.4	NA	NA	1	NA	NA	NA	1	2	2	1	37.5	168	22.32	1.82	0.56	69.69	0.388
110443	9192.415853	9902.44259	2	71	5	12	4.1	110	18	26	14	108	131	0.92	2.7	4.94	12	104	189	289	4.2	4	145	0.4	8.8	191	6.8	152	3.9	19.2	0	2	2	NA	2	2	2	2	2	2	10.6	152	6.97	NA	NA	NA	0.303
110444	12095.34993	12440.77764	2	17	4	11	3.8	48	14	27	15	101	83	0.73	3	4.66	11	47	166	283	3.6	3.8	142	0.2	9	171	6.8	47	3.2	20.2	NA	NA	2	NA	NA	NA	NA	2	NA	NA	31.3	186	16.83	NA	NA	NA	0.439
110445	7197.641681	7924.126732	1	34	4	NA	NA	NA	NA	NA	NA	NA	NA	NA	NA	NA	NA	NA	NA	NA	NA	NA	NA	NA	NA	NA	NA	NA	NA	52.2	NA	NA	2	NA	NA	NA	2	1	2	2	11.6	257	4.51	0.33	0.56	145.97	0.5
110446	86127.38599	92413.98583	1	56	3	32	4.2	74	24	25	13	100	139	1.19	3	5.05	22	94	133	275	3.9	4.1	138	0.5	9.4	208	7.2	147	5.3	30.9	1	2	2	NA	2	1	2	2	2	2	1.7	50	3.4	NA	NA	NA	NA
110447	6691.168519	7888.235758	1	10	5	NA	NA	NA	NA	NA	NA	NA	NA	NA	NA	NA	NA	NA	NA	NA	NA	NA	NA	NA	NA	NA	NA	NA	NA	16.8	NA	NA	2	NA	NA	NA	NA	NA	NA	NA	5.7	105	5.43	NA	NA	NA	0.283
110448	2363.285856	2493.900875	2	11	4	NA	NA	NA	NA	NA	NA	NA	NA	NA	NA	NA	NA	NA	NA	NA	NA	NA	NA	NA	NA	NA	NA	NA	NA	20.9	NA	NA	2	NA	NA	NA	NA	NA	NA	NA	7.7	89	8.65	1.18	0.56	10.27	0.327
110449	59958.6936	59013.30196	2	53	3	18	3.9	79	13	29	22	104	53	0.59	3	6.49	18	107	161	293	3.6	4.6	145	0.4	9.9	221	6.9	137	2.7	45.1	0	2	1	NA	2	2	2	1	1	2	44.1	101	43.66	NA	NA	NA	0.618
110450	24814.4637	27238.05062	1	39	1	32	4.3	61	23	25	20	99	141	0.98	2.9	5.22	24	134	75	280	2.9	4.3	139	0.3	9.4	195	7.2	201	6.1	29.1	NA	NA	2	NA	NA	NA	2	2	2	2	1.3	43	3.02	NA	NA	NA	1.559
110451	12783.88981	13944.40139	1	55	3	NA	NA	NA	NA	NA	NA	NA	NA	NA	NA	NA	NA	NA	NA	NA	NA	NA	NA	NA	NA	NA	NA	NA	NA	44.8	NA	2	1	NA	2	2	2	1	2	2	27.2	75	36.27	NA	NA	NA	0.706
110452	22521.15743	22968.31881	1	3	3	NA	NA	NA	NA	NA	NA	NA	NA	NA	NA	NA	NA	NA	NA	NA	NA	NA	NA	NA	NA	NA	NA	NA	NA	16.6	NA	NA	2	NA	NA	NA	NA	NA	NA	NA	8.6	85	10.12	0.08	0.56	17.87	NA
110453	5937.801424	6333.260537	2	69	2	18	3.7	132	19	24	21	106	51	0.69	3.7	6.27	26	72	151	289	4	3.6	143	0.4	8.5	153	7.4	100	5.2	31.1	1	2	2	6.72	2	2	2	2	2	2	35	32	109.38	NA	NA	NA	1.209
110454	19467.69565	19701.20447	2	60	3	13	4.2	56	17	26	14	98	73	0.8	3	6	13	89	146	275	3.7	4.1	137	0.7	9.7	205	7.2	82	4.6	23.7	0	2	2	NA	2	2	2	2	2	2	133.2	183	72.79	NA	NA	NA	0.33
110455	2200.859019	2324.916746	2	9	5	NA	NA	NA	NA	NA	NA	NA	NA	NA	NA	NA	NA	NA	NA	NA	NA	NA	NA	NA	NA	NA	NA	NA	NA	17.4	NA	NA	2	NA	NA	NA	NA	NA	NA	NA	2.1	30	7	NA	NA	NA	NA
110456	11487.26253	12176.10314	2	10	1	NA	NA	NA	NA	NA	NA	NA	NA	NA	NA	NA	NA	NA	NA	NA	NA	NA	NA	NA	NA	NA	NA	NA	NA	15	NA	NA	2	NA	NA	NA	NA	NA	NA	NA	7.3	110	6.64	NA	NA	NA	NA
110457	95167.29977	109849.4494	1	29	3	44	4.5	91	29	26	12	98	83	0.87	2.8	5.61	34	87	133	277	3.2	3.9	139	0.4	9.2	256	7.3	158	5.8	34.5	NA	NA	2	NA	NA	NA	2	1	2	2	4.7	97	4.85	0.08	0.56	8.82	2.806
110458	14734.54982	16665.62462	2	73	4	NA	NA	NA	NA	NA	NA	NA	NA	NA	NA	NA	NA	NA	NA	NA	NA	NA	NA	NA	NA	NA	NA	NA	NA	NA	NA	1	1	NA	2	1	2	2	2	2	NA	NA	NA	NA	NA	NA	NA
110459	14341.31747	17185.28398	1	9	3	NA	NA	NA	NA	NA	NA	NA	NA	NA	NA	NA	NA	NA	NA	NA	NA	NA	NA	NA	NA	NA	NA	NA	NA	16.2	NA	NA	2	NA	NA	NA	NA	NA	NA	NA	3.4	35	9.71	NA	NA	NA	2.588
110460	48074.71805	49214.73583	2	31	3	12	4.2	58	20	26	18	101	133	0.78	3	4.77	13	167	156	282	3.1	3.9	141	0.5	9.5	146	7.2	57	4.8	26.6	NA	NA	2	NA	NA	NA	2	1	2	2	11.6	192	6.04	NA	NA	NA	0.831
110461	57494.59207	63601.5105	1	50	3	20	3.9	77	22	29	10	96	150	0.89	3.3	3.94	40	123	172	273	3.8	3.8	138	0.5	9.1	242	7.2	235	6.6	23.2	0	1	2	NA	2	2	2	2	2	2	1.9	16	11.88	NA	NA	NA	0.719
110462	12755.10396	14388.64181	1	5	3	NA	NA	NA	NA	NA	NA	NA	NA	NA	NA	NA	NA	NA	NA	NA	NA	NA	NA	NA	NA	NA	NA	NA	NA	18.1	NA	NA	2	NA	NA	NA	NA	NA	NA	NA	37.5	99	37.88	1.19	0.56	5.53	NA
110463	9163.66184	10448.1474	1	70	5	19	4.1	68	24	24	8	89	138	0.91	2.6	4.44	15	97	137	256	4.1	4.2	129	0.4	8.6	105	6.7	157	5.5	NA	NA	1	2	4.88	2	2	2	2	1	2	2.1	32	6.56	0.08	0.91	3.27	NA
110464	62044.15318	66542.74376	2	47	3	24	3.5	72	24	24	10	101	97	0.79	3.2	4.61	42	81	134	281	2.8	4.6	142	0.4	8.7	189	6.7	74	6.1	21.7	NA	2	2	4.94	NA	NA	2	2	2	2	1.5	18	8.33	0.08	0.8	2.69	4.714
110465	8899.188626	9216.994775	2	58	5	11	4	63	17	27	26	98	102	0.81	3.4	5.05	17	52	181	286	4.6	3.9	141	0.2	9.1	337	7.4	145	6.8	21.5	NA	1	2	5.44	2	2	1	2	2	2	2.8	41	6.83	NA	NA	NA	NA
110466	13215.11065	0	2	6	1	NA	NA	NA	NA	NA	NA	NA	NA	NA	NA	NA	NA	NA	NA	NA	NA	NA	NA	NA	NA	NA	NA	NA	NA	NA	NA	NA	2	NA	NA	NA	NA	NA	NA	NA	NA	NA	NA	NA	NA	NA	NA
110467	18013.58914	18905.27136	2	33	4	14	3.8	56	17	25	13	103	195	0.8	3.2	5.38	19	79	140	276	3.4	3.7	138	0.7	9.1	142	7	51	2.9	33.1	NA	NA	2	5.38	NA	NA	2	1	2	2	14.2	283	5.02	NA	NA	NA	0.264
110468	50057.98383	53283.45587	1	62	5	NA	NA	NA	NA	NA	NA	NA	NA	NA	NA	NA	NA	NA	NA	NA	NA	NA	NA	NA	NA	NA	NA	NA	NA	44.7	1	1	1	NA	2	2	2	1	1	2	718	70	1025.71	NA	NA	NA	1.75
110469	6363.921431	6824.514415	1	7	4	NA	NA	NA	NA	NA	NA	NA	NA	NA	NA	NA	NA	NA	NA	NA	NA	NA	NA	NA	NA	NA	NA	NA	NA	15.7	NA	NA	2	NA	NA	NA	NA	NA	NA	NA	9.7	88	11.02	0.08	0.56	2.81	0.283
110470	29208.5972	29483.91006	2	17	3	9	4.2	101	20	26	14	103	195	0.72	2.4	4.72	8	131	170	283	3.7	4.1	142	0.6	9.5	165	6.6	62	4.5	20.2	NA	NA	2	5.38	NA	NA	NA	2	NA	NA	24.8	229	10.83	NA	NA	NA	0.252
110471	12520.7379	0	2	12	5	NA	NA	NA	NA	NA	NA	NA	NA	NA	NA	NA	NA	NA	NA	NA	NA	NA	NA	NA	NA	NA	NA	NA	NA	NA	NA	NA	2	NA	NA	NA	NA	NA	NA	NA	NA	NA	NA	NA	NA	NA	NA
110472	21459.57562	0	1	28	2	NA	NA	NA	NA	NA	NA	NA	NA	NA	NA	NA	NA	NA	NA	NA	NA	NA	NA	NA	NA	NA	NA	NA	NA	NA	NA	NA	2	NA	NA	NA	2	1	2	2	NA	NA	NA	NA	NA	NA	NA
110473	10835.52374	12371.65624	1	44	5	42	5	42	24	27	13	99	74	0.73	2.3	6.99	21	123	122	281	4.4	4	140	1	10	113	7.3	93	4	24.7	NA	2	1	NA	NA	NA	2	2	2	2	4.8	48	10	0.08	0.56	5.98	2.016
110474	8993.651594	9480.973405	2	56	4	21	3.6	124	18	27	12	104	187	0.75	3.1	4.72	29	79	226	286	3.5	4	144	0.3	9	175	6.7	114	5.2	33.8	NA	2	2	5.27	2	2	2	2	2	2	6.8	130	5.23	NA	NA	NA	0.479
110475	10600.6672	11254.28507	1	6	4	NA	NA	NA	NA	NA	NA	NA	NA	NA	NA	NA	NA	NA	NA	NA	NA	NA	NA	NA	NA	NA	NA	NA	NA	16.1	NA	NA	2	NA	NA	NA	NA	NA	NA	NA	17.2	140	12.29	0.45	0.56	7.29	0.229
110476	8134.216198	8827.719241	2	22	5	12	3.8	81	25	25	9	100	230	0.8	3.8	4.94	17	35	147	279	3.8	4	141	0.2	8.7	106	7.6	32	6.6	29	NA	NA	2	5.33	NA	NA	2	2	2	2	14.6	183	7.98	0.92	0.56	23.98	0.05
110477	6602.107769	7166.890945	1	23	4	35	4.2	54	23	31	16	100	238	1.04	2.8	4.66	13	120	152	282	4	4.3	141	0.6	9.7	186	7	81	6	29.1	NA	NA	2	NA	NA	NA	2	2	2	2	11.6	171	6.78	NA	NA	NA	0.384
110478	43371.88539	47148.86064	1	18	3	18	4.6	64	19	27	13	101	112	0.81	2.5	4.88	12	158	143	285	3.4	4	143	0.3	9.8	161	7.1	265	4.8	27.8	NA	NA	2	NA	NA	NA	NA	1	NA	NA	9.6	138	6.96	NA	NA	NA	1.033
110479	10817.32365	11074.12339	2	69	4	NA	NA	NA	NA	NA	NA	NA	NA	NA	NA	NA	NA	NA	NA	NA	NA	NA	NA	NA	NA	NA	NA	NA	NA	30.3	1	1	2	NA	2	1	1	1	1	2	32.1	186	17.26	NA	NA	NA	0.193
110480	15266.48299	17220.08332	1	15	3	11	4	65	17	28	19	102	117	0.75	3	5.16	13	21	152	289	3.4	4.1	144	0.3	9.4	97	7	47	5.5	16.1	NA	NA	2	NA	NA	NA	NA	NA	NA	NA	17	194	8.76	0.08	0.56	2.86	0.258
110481	19840.33739	21702.07782	1	15	3	10	4.2	119	14	28	8	102	77	0.78	3	4.77	10	86	146	281	4.4	4.2	142	0.4	9.8	167	7.2	97	5.3	18.8	NA	NA	2	5.33	NA	NA	NA	NA	NA	NA	15.3	115	13.3	NA	NA	NA	0.35
110482	29086.29763	33724.39418	1	77	3	9	4.2	58	12	26	13	101	80	0.76	2.3	5.77	19	98	154	282	3.3	3.9	141	0.6	8.8	152	6.5	98	4.1	31.8	1	2	1	NA	2	2	2	1	2	2	55.2	135	40.89	NA	NA	NA	0.583
110483	9468.506875	11041.29204	1	6	5	NA	NA	NA	NA	NA	NA	NA	NA	NA	NA	NA	NA	NA	NA	NA	NA	NA	NA	NA	NA	NA	NA	NA	NA	14	NA	NA	2	NA	NA	NA	NA	NA	NA	NA	5.8	60	9.67	0.08	0.56	5.18	NA
110484	19321.11962	27324.5802	2	8	1	NA	NA	NA	NA	NA	NA	NA	NA	NA	NA	NA	NA	NA	NA	NA	NA	NA	NA	NA	NA	NA	NA	NA	NA	20.2	NA	NA	2	NA	NA	NA	NA	NA	NA	NA	75.4	131	57.56	NA	NA	NA	0.289
110485	5758.259629	6474.156933	2	5	1	NA	NA	NA	NA	NA	NA	NA	NA	NA	NA	NA	NA	NA	NA	NA	NA	NA	NA	NA	NA	NA	NA	NA	NA	13.7	NA	NA	2	NA	NA	NA	NA	NA	NA	NA	13.6	46	29.57	0.08	0.56	2.64	NA
110486	13655.27856	13627.89047	2	13	3	15	4.6	122	22	21	11	105	124	0.72	3.3	4.39	18	89	146	281	4.5	4.3	142	0.2	9.9	167	7.9	112	5.7	26.5	NA	NA	2	NA	NA	NA	NA	NA	NA	NA	8.2	21	39.05	NA	NA	NA	0.637
110487	2036.322818	2173.084251	1	0	4	NA	NA	NA	NA	NA	NA	NA	NA	NA	NA	NA	NA	NA	NA	NA	NA	NA	NA	NA	NA	NA	NA	NA	NA	NA	NA	NA	NA	NA	NA	NA	NA	NA	NA	NA	NA	NA	NA	NA	NA	NA	NA
110488	7332.033428	7985.082531	1	71	4	15	4	92	22	28	22	102	519	1.78	2.9	7.88	19	54	187	291	4	4.2	143	0.4	9.3	139	6.9	79	5.9	37.9	1	1	1	8.33	2	2	2	1	1	2	213.5	292	73.12	0.08	0.56	59.59	0.083
110489	7390.076724	7515.649611	1	80	4	10	3.7	126	12	26	17	103	116	1.72	3.3	5.27	19	67	216	283	4	5	141	0.4	9	181	7	110	5.2	20.4	NA	2	2	5.61	2	2	2	2	2	2	NA	NA	NA	NA	NA	NA	NA
110490	3513.076222	3730.7881	2	23	2	NA	NA	NA	NA	NA	NA	NA	NA	NA	NA	NA	NA	NA	NA	NA	NA	NA	NA	NA	NA	NA	NA	NA	NA	16.1	NA	NA	2	NA	NA	NA	2	2	2	2	NA	NA	NA	NA	NA	NA	NA
110491	9213.462806	0	1	76	4	NA	NA	NA	NA	NA	NA	NA	NA	NA	NA	NA	NA	NA	NA	NA	NA	NA	NA	NA	NA	NA	NA	NA	NA	NA	NA	2	1	NA	2	2	2	2	2	2	NA	NA	NA	NA	NA	NA	NA
110492	8976.989497	9503.952579	2	39	4	13	4.4	66	16	23	10	100	179	0.88	3.7	4.88	29	103	167	272	3.3	4	137	0.7	10	196	8.1	57	5.2	30.7	NA	NA	2	NA	NA	NA	2	2	2	2	14.9	106	14.06	NA	NA	NA	2.278
110493	23417.64751	24156.60823	2	37	4	NA	NA	NA	NA	NA	NA	NA	NA	NA	NA	NA	NA	NA	NA	NA	NA	NA	NA	NA	NA	NA	NA	NA	NA	37.6	NA	NA	2	NA	NA	NA	2	2	2	2	3.4	73	4.66	NA	NA	NA	NA
110494	25777.48181	29268.62302	1	49	4	11	3.6	65	17	26	15	106	130	0.89	2.8	4.33	25	51	145	287	3.2	3.9	144	0.2	8.7	181	6.4	69	4.3	27.6	NA	1	2	4.77	NA	NA	2	2	2	2	15.5	213	7.28	1.55	2.42	27.7	0.917
110495	85939.81341	93758.10759	2	54	3	18	4.5	66	19	27	16	100	70	0.81	2.7	4.66	20	60	215	284	3.8	4.2	142	0.4	9.4	193	7.2	118	5.4	62.1	0	2	2	NA	2	2	2	1	2	2	10.8	190	5.68	NA	NA	NA	0.289
110496	69485.24744	70003.73288	2	52	3	23	4.4	48	25	26	12	95	100	0.73	2.8	5.61	14	89	187	272	3.6	3.8	136	0.4	9.9	181	7.2	87	5.3	32	1	2	2	NA	2	2	2	1	2	2	2	43	4.65	0.45	0.56	25.73	0.777
110497	26702.11479	28473.53353	2	18	3	21	3.5	16	23	24	7	105	49	0.47	2.7	4.44	9	125	136	273	3.8	3.9	138	0.3	8.9	167	6.2	82	3	NA	NA	NA	2	4.72	NA	NA	NA	2	NA	NA	2.6	26	10	0.08	0.56	0.74	0.042
110498	8630.513953	9691.793511	2	54	5	14	3.9	90	20	28	19	105	159	0.71	4.1	5.16	16	99	190	287	3.8	4.2	143	0.6	9.4	224	8	74	7.5	26.1	0	2	2	5.66	2	2	2	2	2	1	265	102	259.8	NA	NA	NA	0.547
110499	6077.146442	0	1	54	1	NA	NA	NA	NA	NA	NA	NA	NA	NA	NA	NA	NA	NA	NA	NA	NA	NA	NA	NA	NA	NA	NA	NA	NA	NA	NA	2	2	NA	2	2	2	2	2	2	NA	NA	NA	NA	NA	NA	NA
110500	22069.3708	24013.75798	1	4	3	NA	NA	NA	NA	NA	NA	NA	NA	NA	NA	NA	NA	NA	NA	NA	NA	NA	NA	NA	NA	NA	NA	NA	NA	15.4	NA	NA	2	NA	NA	NA	NA	NA	NA	NA	4.2	33	12.73	0.08	0.56	2.57	NA
110501	5939.925679	6785.452312	1	8	2	NA	NA	NA	NA	NA	NA	NA	NA	NA	NA	NA	NA	NA	NA	NA	NA	NA	NA	NA	NA	NA	NA	NA	NA	NA	NA	NA	2	NA	NA	NA	NA	NA	NA	NA	2.2	44	5	0.08	0.56	2.69	NA
110502	13624.55433	15253.7063	2	2	2	NA	NA	NA	NA	NA	NA	NA	NA	NA	NA	NA	NA	NA	NA	NA	NA	NA	NA	NA	NA	NA	NA	NA	NA	17.1	NA	NA	2	NA	NA	NA	NA	NA	NA	NA	NA	NA	NA	NA	NA	NA	NA
110503	35915.96439	37386.11266	2	34	3	17	3.8	90	13	24	9	102	77	0.67	3.3	4.72	18	23	141	274	3.8	4.6	138	0.2	9.3	226	7.1	186	3.6	33.9	NA	NA	2	5.05	NA	NA	2	2	2	2	9.5	209	4.55	NA	NA	NA	NA
110504	24208.44903	27609.40079	2	80	3	NA	NA	NA	NA	NA	NA	NA	NA	NA	NA	NA	NA	NA	NA	NA	NA	NA	NA	NA	NA	NA	NA	NA	NA	26	NA	2	2	5.5	1	2	2	2	2	1	9.1	48	18.96	NA	NA	NA	0.829
110505	6775.189271	7455.29042	1	2	4	NA	NA	NA	NA	NA	NA	NA	NA	NA	NA	NA	NA	NA	NA	NA	NA	NA	NA	NA	NA	NA	NA	NA	NA	17.2	NA	NA	2	NA	NA	NA	NA	NA	NA	NA	NA	NA	NA	NA	NA	NA	NA
110506	62804.79543	69296.82517	1	65	3	31	4.5	59	29	29	27	100	108	1.69	1.9	5.33	24	89	132	286	3.1	4.4	141	0.3	9.2	146	6.4	133	5.6	22.3	0	2	1	NA	2	2	2	2	2	1	9.9	135	7.33	NA	NA	NA	1.321
110507	55749.1165	57100.48192	2	19	3	17	4.2	107	17	22	15	103	107	0.73	2.4	4.72	9	28	149	283	4.9	4.2	142	0.2	9.6	166	6.6	91	3.8	27.1	NA	NA	2	NA	NA	NA	NA	1	NA	NA	14.6	143	10.21	NA	NA	NA	NA
110508	11295.55476	11997.60322	2	61	4	14	3.9	60	17	24	16	100	105	0.9	3.2	4.66	19	85	142	282	4	3.9	141	0.5	10	259	7.1	92	4.4	25.2	0	1	2	5.16	2	2	2	2	2	2	4.7	138	3.41	0.08	0.56	646.03	1.26
110509	39321.59099	42458.51145	1	60	3	52	3.9	94	39	27	24	99	188	1.12	3.3	5.16	34	128	218	281	2.6	4.6	139	0.4	9.5	172	7.2	35	5.5	26	0	2	2	5.55	2	2	2	2	2	2	3	103	2.91	0.86	0.56	4.64	1.064
110510	3630.852512	3768.937634	2	59	4	11	3.8	86	13	27	13	103	161	0.95	3.4	5.11	14	72	157	287	4.1	3.5	144	0.6	8.9	147	7.2	78	5.2	31.1	0	1	2	NA	2	2	2	2	2	2	9.7	118	8.22	NA	NA	NA	1.436
110511	9207.212067	9944.592782	2	23	4	10	3.3	74	12	24	6	102	129	0.72	3.6	6.88	14	21	128	275	3.6	4.1	138	0.2	9.5	156	6.9	82	5.4	43.3	NA	NA	1	NA	NA	NA	2	1	2	2	6.9	194	3.56	NA	NA	NA	0.441
110512	18667.04396	20726.22633	1	19	3	21	4.6	53	18	26	20	105	113	0.92	2.5	5	13	74	122	291	3.4	3.9	145	0.2	9.3	143	7.1	129	5.2	27.3	NA	NA	2	NA	NA	NA	NA	2	NA	NA	12.6	129	9.77	NA	NA	NA	0.667
110513	30525.76813	35141.54624	1	4	3	NA	NA	NA	NA	NA	NA	NA	NA	NA	NA	NA	NA	NA	NA	NA	NA	NA	NA	NA	NA	NA	NA	NA	NA	16.3	NA	NA	2	NA	NA	NA	NA	NA	NA	NA	13.6	31	43.87	0.08	0.56	3.01	NA
110514	5116.255063	5523.7145	1	64	4	NA	NA	NA	NA	NA	NA	NA	NA	NA	NA	NA	NA	NA	NA	NA	NA	NA	NA	NA	NA	NA	NA	NA	NA	26	1	2	2	5.5	2	2	2	2	2	2	30.3	162	18.7	NA	NA	NA	0.416
110515	17035.73451	18391.14686	2	55	3	20	4.5	97	18	25	18	96	51	0.7	2.7	5.38	16	103	141	279	4.5	3.6	139	0.3	9.9	221	7.2	182	3.6	20.9	NA	1	2	NA	2	1	2	2	1	2	10.9	179	6.09	NA	NA	NA	0.245
110516	16235.15507	17010.98663	2	14	1	13	4.4	165	18	23	6	102	109	0.48	3.6	4.77	12	37	159	276	4.3	4.6	140	0.3	9.6	175	8	101	5.2	24.6	NA	NA	2	4.94	NA	NA	NA	NA	NA	NA	5.2	91	5.71	0.08	0.56	1.86	NA
110517	12419.91428	13040.90646	2	16	3	7	4.1	72	13	26	11	104	56	0.71	3	4.83	6	95	137	286	4.8	3.7	144	0.2	9.4	168	7.1	199	3.4	18.7	NA	NA	2	NA	NA	NA	NA	1	NA	NA	11.1	61	18.2	NA	NA	NA	0.385
110518	70993.82947	71981.05794	2	57	3	31	4.4	84	32	28	12	99	93	0.63	2.7	5.11	33	75	183	281	3.5	3.8	141	0.4	9.8	234	7.1	86	4.6	25.5	0	2	2	NA	2	2	2	1	1	2	3.6	25	14.4	NA	NA	NA	0.405
110519	7682.273647	9403.586207	1	8	5	NA	NA	NA	NA	NA	NA	NA	NA	NA	NA	NA	NA	NA	NA	NA	NA	NA	NA	NA	NA	NA	NA	NA	NA	29.6	NA	NA	2	NA	NA	NA	NA	NA	NA	NA	9.1	122	7.46	0.08	0.56	5.88	0.452
110520	40428.14419	44622.92715	1	25	1	13	4.5	79	20	25	10	102	256	0.76	3	5.5	14	103	121	278	3.2	3.6	140	0.3	9.6	164	7.5	53	4.6	23.8	NA	NA	2	6	NA	NA	2	1	2	2	17.6	351	5.01	NA	NA	NA	0.4
110521	35021.59577	35900.92218	2	19	3	420	4.1	62	198	29	14	102	729	0.8	2.4	4.77	26	170	227	279	3.9	3.9	140	0.7	9.4	133	6.5	58	4.6	24.1	NA	NA	2	4.94	NA	NA	NA	2	NA	NA	1.5	33	4.55	0.08	0.56	2.6	0.284
110522	3947.513868	4234.848578	1	64	4	16	4.4	104	19	23	16	98	253	0.84	3.5	6	38	98	227	277	3.7	4.3	138	0.4	9.9	154	7.9	80	4.8	33.8	0	2	3	6.16	2	2	1	1	2	2	133.4	129	103.41	NA	NA	NA	1.064
110523	14878.74161	17251.83616	1	2	1	NA	NA	NA	NA	NA	NA	NA	NA	NA	NA	NA	NA	NA	NA	NA	NA	NA	NA	NA	NA	NA	NA	NA	NA	14.6	NA	NA	2	NA	NA	NA	NA	NA	NA	NA	NA	NA	NA	NA	NA	NA	NA
110524	10360.45707	11122.33503	1	58	4	27	4.2	97	25	24	13	102	309	1.07	3	3.66	94	124	156	280	3	3.2	141	1.1	9.3	139	7.2	250	5.4	33.2	0	1	1	NA	2	2	2	1	2	2	164.5	100	164.5	0.08	0.56	3.71	1.038
110525	17050.98024	18306.38404	1	11	1	NA	NA	NA	NA	NA	NA	NA	NA	NA	NA	NA	NA	NA	NA	NA	NA	NA	NA	NA	NA	NA	NA	NA	NA	20.3	NA	NA	2	NA	NA	NA	NA	NA	NA	NA	13	122	10.66	NA	NA	NA	NA
110526	50334.18602	59384.93882	1	23	3	17	4.2	56	17	24	13	107	171	0.81	2.7	4.88	18	65	159	292	3.5	4.6	147	0.4	9.9	121	6.9	31	3.5	26.4	NA	NA	2	5.11	NA	NA	2	2	2	2	1.5	47	3.19	0.08	0.56	1.13	1.545
110527	8082.035907	8514.068708	2	39	4	13	3.9	88	15	22	9	107	139	1.16	3.6	4.77	27	85	205	279	3.6	4.4	141	0.6	9.2	151	7.5	97	5.6	38	NA	NA	2	4.72	NA	NA	2	2	2	2	4.2	193	2.18	NA	NA	NA	0.752
110528	22605.52025	23150.78599	2	39	4	9	4.5	51	15	24	10	103	186	0.77	3.3	4.61	24	17	157	281	3.6	4	142	0.2	9.3	183	7.8	43	3	27.3	NA	NA	2	NA	NA	NA	2	1	1	2	27.2	317	8.58	1.88	0.56	25.83	NA
110529	5593.604661	5891.407022	2	43	4	NA	NA	NA	NA	NA	NA	NA	NA	NA	NA	NA	NA	NA	NA	NA	NA	NA	NA	NA	NA	NA	NA	NA	NA	44	NA	2	2	6.11	NA	NA	2	2	2	2	77.6	257	30.19	0.39	1.35	91.88	NA
110530	16082.58076	17026.74583	1	46	4	15	3.8	65	20	25	15	103	419	1.13	2.4	4.5	18	71	143	281	4.8	4	141	0.4	8.8	204	6.2	204	7.3	31.2	NA	2	2	NA	NA	NA	2	2	2	2	7.1	121	5.87	NA	NA	NA	1.132
110531	4862.101419	5142.830572	2	68	4	11	3.5	69	12	22	44	105	145	1.91	4.2	6.55	21	83	172	297	4.1	4.8	143	0.2	9.1	124	7.7	136	8.7	36.9	NA	2	1	6.72	2	2	2	2	2	1	1780	89	2000	NA	NA	NA	0.367
110532	183289.4871	189289.8696	2	57	3	20	4.2	85	18	27	16	99	188	0.66	3.8	9.44	16	139	209	292	3.4	4.3	144	0.6	9.8	215	8	120	5.3	37.3	1	2	1	10.3	2	2	2	1	2	2	18.9	60	31.5	0.08	0.56	2.13	0.53
110533	14236.49119	16027.9841	2	2	2	NA	NA	NA	NA	NA	NA	NA	NA	NA	NA	NA	NA	NA	NA	NA	NA	NA	NA	NA	NA	NA	NA	NA	NA	17.9	NA	NA	2	NA	NA	NA	NA	NA	NA	NA	NA	NA	NA	NA	NA	NA	NA
110534	41132.16215	44714.09448	1	17	3	25	4.3	127	21	23	13	104	180	0.74	2.8	4.72	23	79	113	284	4.3	4.5	143	0.5	9.8	152	7.1	95	6.2	22.3	NA	NA	2	NA	NA	NA	NA	2	NA	NA	278	306	90.85	NA	NA	NA	0.445
110535	22322.95925	24668.87984	1	36	4	NA	NA	NA	NA	NA	NA	NA	NA	NA	NA	NA	NA	NA	NA	NA	NA	NA	NA	NA	NA	NA	NA	NA	NA	29.7	NA	NA	2	NA	NA	NA	2	2	2	2	75.1	154	48.77	0.48	0.56	21	0.725
110536	6244.659095	7178.951956	1	9	4	NA	NA	NA	NA	NA	NA	NA	NA	NA	NA	NA	NA	NA	NA	NA	NA	NA	NA	NA	NA	NA	NA	NA	NA	19.2	NA	NA	2	NA	NA	NA	NA	NA	NA	NA	8.9	49	18.16	0.08	0.56	2.7	0.603
110537	31242.52387	0	2	26	3	NA	NA	NA	NA	NA	NA	NA	NA	NA	NA	NA	NA	NA	NA	NA	NA	NA	NA	NA	NA	NA	NA	NA	NA	NA	NA	NA	2	NA	NA	NA	2	2	2	2	NA	NA	NA	NA	NA	NA	NA
110538	3538.996759	3590.153097	2	63	4	19	3.6	84	22	24	11	98	80	0.59	4.3	9.1	33	62	150	282	3.3	4	140	0.3	9.1	168	7.9	107	5.7	56.1	1	2	1	9.6	1	2	2	1	2	2	87.8	179	49.05	0.08	0.56	11.15	0.49
110539	4354.741502	5442.929961	2	9	5	NA	NA	NA	NA	NA	NA	NA	NA	NA	NA	NA	NA	NA	NA	NA	NA	NA	NA	NA	NA	NA	NA	NA	NA	14.9	NA	NA	2	NA	NA	NA	NA	NA	NA	NA	3.2	57	5.61	0.08	0.56	16.88	0.854
110540	16165.76908	17400.07848	2	28	5	11	4	125	17	21	12	99	115	0.75	3.4	5	13	26	159	275	2.8	3.9	138	0.2	8.8	166	7.4	92	4.1	24.3	NA	NA	2	NA	NA	NA	2	2	2	2	1.3	35	3.71	NA	NA	NA	NA
110541	11577.92821	11943.11507	1	18	5	21	3.9	94	16	23	11	102	102	0.83	3.5	5.94	24	62	141	281	3.3	4.1	141	0.3	9.1	137	7.4	109	6.5	40.7	NA	NA	2	NA	NA	NA	NA	1	NA	NA	5.1	157	3.25	1.04	0.56	5.56	NA
110542	19398.8741	19562.44498	1	16	5	19	4.1	251	30	23	13	104	484	0.89	2.8	4.77	13	74	179	279	4.3	4.3	140	1.3	9.3	149	6.9	56	7.5	20.5	NA	NA	2	5.22	NA	NA	NA	2	NA	NA	17	156	10.9	0.08	0.56	13.34	0.943
110543	21619.22567	21865.35179	2	27	5	16	4.4	107	20	25	11	99	72	0.64	3.3	5.05	20	86	119	278	3.6	3.6	140	0.7	9.5	179	7.7	62	4.5	20.6	NA	NA	2	5.5	NA	NA	2	2	2	2	1.4	25	5.6	NA	NA	NA	3.011
110544	17868.91333	20160.76955	1	61	3	32	4.1	100	25	26	14	100	133	1.02	3.4	3.28	51	83	151	276	4	4.2	139	0.4	9.6	216	7.5	365	5.9	29.8	0	2	2	NA	2	2	2	2	2	2	9.8	145	6.76	2.4	0.56	33.32	1.239
110545	65367.19893	68615.37036	1	37	3	32	4.2	61	25	21	16	100	139	0.93	3.3	5.83	24	85	141	272	3	4	135	1.2	9.3	228	7.5	116	8.8	42.9	NA	NA	2	6.05	NA	NA	2	1	2	2	3.1	78	3.97	NA	NA	NA	0.874
110546	14083.71212	15705.98978	1	40	5	29	3.8	74	21	23	15	107	72	0.94	3.3	5.55	17	74	146	284	2.7	4.6	142	0.3	9.1	196	7.1	155	6.4	27.7	NA	2	2	5.77	NA	NA	2	1	1	2	17	220	7.73	NA	NA	NA	0.425
110547	160908.5508	177873.9598	1	40	3	16	4.4	44	21	29	18	100	228	0.88	3	4.83	16	65	164	279	3.7	4.8	139	0.4	9.4	213	7.4	164	4.9	27.5	NA	2	2	5.11	NA	NA	2	2	2	2	4.6	131	3.51	NA	NA	NA	NA
110548	16673.05003	17058.15146	2	55	1	17	3.8	138	21	26	13	102	60	0.71	3.6	5.33	23	54	185	285	3.4	4.1	143	0.3	9.1	215	7.4	145	3.9	36	1	2	2	NA	2	2	2	2	2	2	2.9	33	8.79	NA	NA	NA	0.343
110549	3618.601365	4210.162724	1	10	4	NA	NA	NA	NA	NA	NA	NA	NA	NA	NA	NA	NA	NA	NA	NA	NA	NA	NA	NA	NA	NA	NA	NA	NA	30.8	NA	NA	2	NA	NA	NA	NA	NA	NA	NA	3.3	56	5.89	NA	NA	NA	1.367
110550	33294.29586	35814.63212	1	39	1	33	4.4	66	22	29	18	103	142	1.01	2.6	5	17	58	163	285	4.5	3.9	142	0.2	9.5	249	7	508	5.5	32.8	NA	NA	2	NA	NA	NA	2	1	2	2	2.7	193	1.4	NA	NA	NA	1.575
110551	51714.31131	49166.05503	1	47	2	26	4	79	20	25	16	106	84	1.06	2.9	4.61	35	88	140	287	3.1	4.2	144	1	9.6	160	6.9	174	7.3	27.4	NA	2	2	NA	NA	NA	2	2	2	2	4.2	117	3.59	0.08	0.56	5.66	0.527
110552	19709.25901	21869.85349	2	34	1	11	3.5	91	15	26	15	102	104	0.51	3.5	5.27	11	23	143	280	2.7	3.9	140	0.2	8.6	168	7	176	4.1	33.5	NA	NA	2	5.77	NA	NA	1	1	1	1	8.6	124	6.94	NA	NA	NA	0.621
110553	14019.03686	15264.78762	2	24	5	8	4.1	61	14	25	10	101	111	0.72	3.3	4.5	12	61	141	277	3.8	4.1	140	0.4	9.1	190	7.4	79	4	22.8	NA	NA	2	NA	NA	NA	2	2	2	2	3.7	42	8.81	NA	NA	NA	2.5
110554	20731.06555	0	1	26	5	NA	NA	NA	NA	NA	NA	NA	NA	NA	NA	NA	NA	NA	NA	NA	NA	NA	NA	NA	NA	NA	NA	NA	NA	NA	NA	NA	2	NA	NA	NA	2	2	2	2	NA	NA	NA	NA	NA	NA	NA
110555	4917.633109	5179.08889	2	49	4	15	4.1	76	19	28	18	99	110	1.03	4	4.72	22	81	163	282	3.3	3.9	141	0.4	9.6	173	8.1	81	8	36.4	NA	2	2	NA	NA	NA	2	1	2	2	9.5	177	5.37	0.08	0.56	11.02	NA
110556	89020.67517	0	2	70	3	NA	NA	NA	NA	NA	NA	NA	NA	NA	NA	NA	NA	NA	NA	NA	NA	NA	NA	NA	NA	NA	NA	NA	NA	NA	NA	2	2	NA	2	2	2	2	2	2	NA	NA	NA	NA	NA	NA	NA
110557	28863.70707	30810.12178	1	34	5	12	4.1	56	NA	23	16	103	76	0.87	2.6	4.33	15	107	NA	276	3.2	4	138	0.3	8.9	159	6.7	85	4.7	20	NA	NA	2	NA	NA	NA	2	2	2	2	NA	NA	NA	NA	NA	NA	NA
110558	5605.365025	5877.480836	2	61	4	32	4.2	86	21	24	16	99	107	0.61	3.2	5.77	46	103	199	281	4.8	4.3	140	0.8	10.2	273	7.4	116	4.6	19.9	1	2	1	NA	2	2	2	2	2	2	34.4	75	45.87	NA	NA	NA	0.488
110559	18933.54522	22698.01219	2	9	3	NA	NA	NA	NA	NA	NA	NA	NA	NA	NA	NA	NA	NA	NA	NA	NA	NA	NA	NA	NA	NA	NA	NA	NA	21.7	NA	NA	2	NA	NA	NA	NA	NA	NA	NA	1.8	23	7.83	0.08	0.56	1.4	1.054
110560	33994.65646	38262.3894	1	31	5	63	3.8	86	38	22	13	104	128	0.85	3.2	4.61	301	155	162	282	2.8	4.6	142	1.2	9.1	230	7	317	8.1	31.4	NA	NA	2	NA	NA	NA	2	1	2	2	0.7	81	0.86	NA	NA	NA	NA
110561	7943.946423	7460.09102	2	0	3	NA	NA	NA	NA	NA	NA	NA	NA	NA	NA	NA	NA	NA	NA	NA	NA	NA	NA	NA	NA	NA	NA	NA	NA	NA	NA	NA	NA	NA	NA	NA	NA	NA	NA	NA	NA	NA	NA	NA	NA	NA	NA
110562	35213.28777	40668.91211	2	11	3	NA	NA	NA	NA	NA	NA	NA	NA	NA	NA	NA	NA	NA	NA	NA	NA	NA	NA	NA	NA	NA	NA	NA	NA	19	NA	NA	2	NA	NA	NA	NA	NA	NA	NA	11.1	43	25.81	0.08	0.56	2.09	0.959
110563	3478.241559	3852.400783	2	0	2	NA	NA	NA	NA	NA	NA	NA	NA	NA	NA	NA	NA	NA	NA	NA	NA	NA	NA	NA	NA	NA	NA	NA	NA	NA	NA	NA	NA	NA	NA	NA	NA	NA	NA	NA	NA	NA	NA	NA	NA	NA	NA
110564	5917.277757	6524.988379	2	0	3	NA	NA	NA	NA	NA	NA	NA	NA	NA	NA	NA	NA	NA	NA	NA	NA	NA	NA	NA	NA	NA	NA	NA	NA	NA	NA	NA	NA	NA	NA	NA	NA	NA	NA	NA	NA	NA	NA	NA	NA	NA	NA
110565	148250.9225	157463.8395	2	27	3	NA	NA	NA	NA	NA	NA	NA	NA	NA	NA	NA	NA	NA	NA	NA	NA	NA	NA	NA	NA	NA	NA	NA	NA	23.6	NA	NA	2	NA	NA	NA	2	1	2	2	2.4	11	21.82	NA	NA	NA	2.663
110566	5570.879419	6058.018111	2	1	4	NA	NA	NA	NA	NA	NA	NA	NA	NA	NA	NA	NA	NA	NA	NA	NA	NA	NA	NA	NA	NA	NA	NA	NA	NA	NA	NA	2	NA	NA	NA	NA	NA	NA	NA	NA	NA	NA	NA	NA	NA	NA
110567	7768.886853	8395.406203	1	34	4	NA	NA	NA	NA	NA	NA	NA	NA	NA	NA	NA	NA	NA	NA	NA	NA	NA	NA	NA	NA	NA	NA	NA	NA	33.4	NA	NA	2	NA	NA	NA	2	2	2	2	4.8	144	3.33	NA	NA	NA	0.924
110568	2748.716293	2990.958854	1	1	4	NA	NA	NA	NA	NA	NA	NA	NA	NA	NA	NA	NA	NA	NA	NA	NA	NA	NA	NA	NA	NA	NA	NA	NA	NA	NA	NA	2	NA	NA	NA	NA	NA	NA	NA	NA	NA	NA	NA	NA	NA	NA
110569	12196.84708	0	1	20	1	NA	NA	NA	NA	NA	NA	NA	NA	NA	NA	NA	NA	NA	NA	NA	NA	NA	NA	NA	NA	NA	NA	NA	NA	NA	NA	NA	2	NA	NA	NA	2	2	2	2	NA	NA	NA	NA	NA	NA	NA
110570	16300.0311	18579.53925	2	11	3	NA	NA	NA	NA	NA	NA	NA	NA	NA	NA	NA	NA	NA	NA	NA	NA	NA	NA	NA	NA	NA	NA	NA	NA	14	NA	NA	2	NA	NA	NA	NA	NA	NA	NA	6	15	40	0.08	0.56	1.03	1.642
110571	9833.574569	10733.81931	2	59	4	14	3.7	121	16	28	17	101	173	0.86	2.8	5.77	38	61	160	281	3.8	3.9	140	0.4	8.7	176	6.5	168	5.2	24.7	1	1	2	6.11	2	2	2	2	2	2	5.1	100	5.1	0.15	0.56	6.94	1.177
110572	19064.50803	20632.63858	2	39	2	19	3.9	68	22	22	11	104	124	0.61	3.3	5.33	28	55	183	281	3.7	4.4	141	0.8	8.7	163	7.2	72	4.4	37.6	NA	NA	2	5.72	NA	NA	2	2	2	2	16.2	269	6.02	NA	NA	NA	0.38
110573	98488.42257	106004.679	1	61	3	20	4.4	84	26	26	16	102	205	1.01	2.4	4.94	19	65	192	286	3.4	4.1	143	0.4	8.9	196	6.8	317	4.9	24.1	1	2	2	NA	2	2	2	2	2	2	7.7	76	10.13	NA	NA	NA	0.92
110574	4743.729543	5838.831193	1	9	4	NA	NA	NA	NA	NA	NA	NA	NA	NA	NA	NA	NA	NA	NA	NA	NA	NA	NA	NA	NA	NA	NA	NA	NA	18.5	NA	NA	2	NA	NA	NA	NA	NA	NA	NA	10.2	71	14.37	0.08	0.56	1.81	0.837
110575	11346.71659	11809.14432	1	80	5	14	3.5	79	14	27	19	101	87	1.12	2.6	5.72	58	55	165	286	3.1	3.7	142	1.2	9	126	6.1	47	8.2	32.5	1	2	2	6.22	2	2	2	1	2	2	86.6	188	46.06	NA	NA	NA	0.631
110576	82605.1575	87175.19518	2	37	3	17	3.8	57	19	21	13	103	74	0.72	2.5	4.83	12	49	138	279	4.4	4.3	140	0.2	8.9	174	6.3	160	3.5	29.7	NA	NA	2	5.16	NA	NA	2	2	2	2	5.2	144	3.61	0.08	0.56	4.81	0.5
110577	21242.60544	22094.50416	2	13	3	13	4	188	16	25	8	102	82	0.58	3.7	5.33	9	59	122	276	3.6	4.2	139	0.3	9.9	176	7.7	58	5	22.3	NA	NA	2	5.72	NA	NA	NA	NA	NA	NA	4.4	69	6.38	0.08	0.56	4.56	0.177
110578	2431.173476	2548.355342	1	66	4	9	3.5	87	13	26	27	103	129	2.62	2.8	11.32	43	50	158	290	4	4.6	140	0.3	9	169	6.3	138	7.4	31.7	1	2	1	11.9	2	2	2	1	2	1	225	151	149.01	NA	NA	NA	0.838
110579	6366.408933	6788.225229	1	48	4	20	3.7	94	16	25	14	100	144	0.96	3	5	34	79	132	272	2.8	4.2	136	0.3	9.1	212	6.7	93	4.7	37.5	NA	2	2	NA	NA	NA	2	2	2	2	8.6	108	7.96	NA	NA	NA	NA
110580	7183.622457	0	2	80	3	NA	NA	NA	NA	NA	NA	NA	NA	NA	NA	NA	NA	NA	NA	NA	NA	NA	NA	NA	NA	NA	NA	NA	NA	NA	NA	2	1	NA	1	2	1	2	2	2	NA	NA	NA	NA	NA	NA	NA
110581	15193.91695	17268.11589	2	40	3	18	4	110	16	25	17	103	41	0.61	3.3	5	40	53	189	284	2.9	3.6	142	0.3	9.2	188	7.3	186	5.2	38.8	NA	2	2	5.5	NA	NA	2	2	2	2	20.7	257	8.05	NA	NA	NA	0.044
110582	14912.16577	16629.87153	1	41	5	NA	NA	NA	NA	NA	NA	NA	NA	NA	NA	NA	NA	NA	NA	NA	NA	NA	NA	NA	NA	NA	NA	NA	NA	30.8	NA	2	2	NA	NA	NA	2	1	2	2	NA	NA	NA	NA	NA	NA	NA
110583	7726.502898	0	2	80	3	NA	NA	NA	NA	NA	NA	NA	NA	NA	NA	NA	NA	NA	NA	NA	NA	NA	NA	NA	NA	NA	NA	NA	NA	NA	NA	1	2	NA	1	2	1	2	2	2	NA	NA	NA	NA	NA	NA	NA
110584	1436.522098	1573.896846	1	0	4	NA	NA	NA	NA	NA	NA	NA	NA	NA	NA	NA	NA	NA	NA	NA	NA	NA	NA	NA	NA	NA	NA	NA	NA	NA	NA	NA	NA	NA	NA	NA	NA	NA	NA	NA	NA	NA	NA	NA	NA	NA	NA
110585	4613.65947	4792.512754	2	12	5	11	4.2	136	15	27	9	102	98	0.97	2.8	4.44	11	79	174	277	4.6	4.3	140	0.2	9.4	110	7	115	4.7	30.4	NA	NA	2	NA	NA	NA	NA	NA	NA	NA	15	103	14.56	0.08	0.56	5.14	0.636
110586	6454.581008	7181.973083	1	69	4	NA	NA	NA	NA	NA	NA	NA	NA	NA	NA	NA	NA	NA	NA	NA	NA	NA	NA	NA	NA	NA	NA	NA	NA	21.7	0	1	2	NA	2	2	2	2	2	2	1.2	35	3.43	0.08	0.56	33.59	0.749
110587	2709.38751	2968.486501	1	0	4	NA	NA	NA	NA	NA	NA	NA	NA	NA	NA	NA	NA	NA	NA	NA	NA	NA	NA	NA	NA	NA	NA	NA	NA	NA	NA	NA	NA	NA	NA	NA	NA	NA	NA	NA	NA	NA	NA	NA	NA	NA	NA
110588	8827.33652	9505.920276	2	65	4	27	4.3	83	22	27	21	100	207	0.96	3.5	5.72	45	65	166	284	3.7	4.3	141	0.4	9.8	290	7.8	88	5.6	31	0	2	2	6.44	2	2	2	1	2	2	9.2	166	5.54	NA	NA	NA	0.511
110589	4947.336618	0	2	22	4	NA	NA	NA	NA	NA	NA	NA	NA	NA	NA	NA	NA	NA	NA	NA	NA	NA	NA	NA	NA	NA	NA	NA	NA	NA	NA	NA	2	NA	NA	NA	2	2	2	2	NA	NA	NA	NA	NA	NA	NA
110590	13897.88633	14056.68298	2	15	3	9	4.6	72	15	23	10	98	85	0.62	2.8	4.72	9	83	140	267	3.8	4.1	134	0.3	9.4	174	7.4	47	4.5	17.1	NA	NA	2	4.94	NA	NA	NA	NA	NA	NA	60.5	323	18.73	NA	NA	NA	NA
110591	9592.188751	9956.007826	1	14	5	NA	NA	NA	NA	NA	NA	NA	NA	NA	NA	NA	NA	NA	NA	NA	NA	NA	NA	NA	NA	NA	NA	NA	NA	18.9	NA	NA	2	NA	NA	NA	NA	NA	NA	NA	104.1	150	69.4	NA	NA	NA	NA
110592	36462.39159	0	2	71	3	NA	NA	NA	NA	NA	NA	NA	NA	NA	NA	NA	NA	NA	NA	NA	NA	NA	NA	NA	NA	NA	NA	NA	NA	NA	NA	2	2	NA	2	2	2	1	2	2	NA	NA	NA	NA	NA	NA	NA
110593	3884.003832	4072.030595	1	19	4	13	4	59	27	26	9	98	737	0.86	2.9	4.77	18	100	141	276	3	4.1	139	0.6	9.8	160	6.9	85	6.3	29.9	NA	NA	2	NA	NA	NA	NA	2	NA	NA	8.9	177	5.03	NA	NA	NA	NA
110594	9846.177576	10324.1063	1	19	1	21	4.7	115	17	27	13	99	159	0.96	2.8	5.44	22	118	179	278	3.2	4.8	139	0.7	9.6	147	7.5	112	6.4	23	NA	NA	2	5.61	NA	NA	NA	2	NA	NA	2.8	75	3.73	0.08	0.56	2.36	NA
110595	11036.03341	12643.75098	1	1	3	NA	NA	NA	NA	NA	NA	NA	NA	NA	NA	NA	NA	NA	NA	NA	NA	NA	NA	NA	NA	NA	NA	NA	NA	NA	NA	NA	2	NA	NA	NA	NA	NA	NA	NA	NA	NA	NA	NA	NA	NA	NA
110596	7676.515602	0	1	1	5	NA	NA	NA	NA	NA	NA	NA	NA	NA	NA	NA	NA	NA	NA	NA	NA	NA	NA	NA	NA	NA	NA	NA	NA	NA	NA	NA	2	NA	NA	NA	NA	NA	NA	NA	NA	NA	NA	NA	NA	NA	NA
110597	30369.02473	33326.61383	2	57	5	NA	NA	NA	NA	NA	NA	NA	NA	NA	NA	NA	NA	NA	NA	NA	NA	NA	NA	NA	NA	NA	NA	NA	NA	37.3	1	1	2	NA	2	2	2	1	2	2	16.5	226	7.3	1.68	0.56	23.25	NA
110598	12146.84347	13237.07809	1	15	5	54	4.7	348	41	23	11	98	234	0.62	2.8	5.27	21	100	265	277	4.7	3.7	139	0.4	9.7	149	7.5	75	7	30.7	NA	NA	2	NA	NA	NA	NA	NA	NA	NA	21.3	329	6.47	NA	NA	NA	0.348
110599	6180.284331	7318.245415	1	2	1	NA	NA	NA	NA	NA	NA	NA	NA	NA	NA	NA	NA	NA	NA	NA	NA	NA	NA	NA	NA	NA	NA	NA	NA	NA	NA	NA	2	NA	NA	NA	NA	NA	NA	NA	NA	NA	NA	NA	NA	NA	NA
110600	6683.05752	6608.063774	2	3	5	NA	NA	NA	NA	NA	NA	NA	NA	NA	NA	NA	NA	NA	NA	NA	NA	NA	NA	NA	NA	NA	NA	NA	NA	16.5	NA	NA	2	NA	NA	NA	NA	NA	NA	NA	NA	NA	NA	NA	NA	NA	NA
110601	8624.801029	9859.39255	2	13	3	13	4.3	164	14	24	11	106	81	0.6	2.6	5.22	6	132	124	282	4.2	4.2	142	0.4	9.5	126	6.9	71	3.8	20.4	NA	NA	2	5.72	NA	NA	NA	NA	NA	NA	6.7	38	17.63	0.08	0.56	1.62	0.146
110602	14704.47676	15807.77273	2	30	5	7	4	41	22	22	10	105	146	0.9	2.9	4.44	23	262	180	283	3.6	3.8	143	0.6	9.2	166	6.9	92	5.4	20	NA	NA	2	4.72	NA	NA	2	2	2	2	3.8	102	3.73	NA	NA	NA	0.444
110603	113971.2385	128777.2939	1	56	5	18	4	92	20	28	16	102	153	1.21	3	4.83	8	57	175	284	3.7	4.1	142	0.2	9	177	7	85	4.5	24.3	NA	2	2	NA	2	2	2	2	2	2	20	154	12.99	0.52	0.56	11.62	0.673
110604	28887.98487	31453.23607	1	19	3	15	4.2	76	19	27	6	103	116	0.69	2.7	4.88	17	165	158	284	3.5	4.4	144	0.7	9.5	134	6.9	66	5.4	21.9	NA	NA	2	5.38	NA	NA	NA	2	NA	NA	4.7	162	2.9	NA	NA	NA	0.804
110605	4177.369936	4634.03133	1	1	3	NA	NA	NA	NA	NA	NA	NA	NA	NA	NA	NA	NA	NA	NA	NA	NA	NA	NA	NA	NA	NA	NA	NA	NA	NA	NA	NA	2	NA	NA	NA	NA	NA	NA	NA	NA	NA	NA	NA	NA	NA	NA
110606	84193.93567	88851.87072	2	33	3	8	3.5	87	11	25	11	102	55	0.85	3.6	5.05	8	36	149	286	3.9	3.7	144	0.2	9	177	7.1	139	4	39	NA	NA	2	5.44	NA	NA	2	1	2	2	115	522	22.03	0.08	0.56	NA	0.152
110607	36967.63222	37626.30682	2	58	3	21	4.2	56	19	25	14	102	101	0.84	2.9	4.44	16	80	190	281	3.2	4	141	0.4	9.5	217	7.1	129	4.4	31.8	0	2	2	NA	2	2	2	1	2	2	1.4	28	5	NA	NA	NA	1.901
110608	4465.356781	4810.187467	1	60	2	32	4	118	23	24	21	98	282	1.02	3.6	17.65	92	115	208	287	2.5	3.5	136	0.4	9.2	177	7.6	191	5.1	42	0	2	1	18.1	2	2	2	1	2	2	1930	147	1312.93	NA	NA	NA	0.495
110609	11128.01094	12517.14424	1	3	4	NA	NA	NA	NA	NA	NA	NA	NA	NA	NA	NA	NA	NA	NA	NA	NA	NA	NA	NA	NA	NA	NA	NA	NA	15.6	NA	NA	2	NA	NA	NA	NA	NA	NA	NA	14.1	124	11.37	0.64	0.56	11.48	NA
110610	26867.46141	28988.91587	2	29	2	12	3.6	80	11	23	12	102	67	0.5	3.6	5.11	12	47	105	277	3.6	4	139	0.5	9.1	196	7.2	137	3.9	42	NA	NA	2	5.66	NA	NA	2	2	2	2	3.8	83	4.58	NA	NA	NA	0.842
110611	43003.88705	46374.11735	2	67	3	15	4.1	102	15	27	15	97	40	0.69	3.1	5.05	16	67	133	272	4.3	4.4	136	0.3	9.5	214	7.2	98	3.5	28.7	0	2	2	NA	1	2	2	2	2	2	3	45	6.67	NA	NA	NA	0.722
110612	21862.59736	0	2	21	1	NA	NA	NA	NA	NA	NA	NA	NA	NA	NA	NA	NA	NA	NA	NA	NA	NA	NA	NA	NA	NA	NA	NA	NA	NA	NA	NA	2	NA	NA	NA	2	2	2	2	NA	NA	NA	NA	NA	NA	NA
110613	3526.336357	3901.337661	1	53	5	31	4.3	62	30	24	24	102	308	0.92	3	5.61	26	53	179	285	4	3.8	141	0.5	8.7	210	7.3	162	4	24.8	0	1	3	NA	2	2	2	2	1	2	9.6	163	5.89	NA	NA	NA	0.829
110614	53350.64283	56579.69513	1	44	1	57	4.3	43	25	25	13	103	78	0.87	2.1	5.05	22	110	139	281	3.4	4.3	141	0.3	9.1	153	6.4	67	6.3	27.8	NA	2	2	5.66	NA	NA	2	1	2	2	7.3	126	5.79	NA	NA	NA	1.866
110615	13028.84958	14424.25465	2	75	4	16	3.8	86	21	26	13	102	497	0.75	3	5.11	24	61	249	281	3.8	3.7	141	0.2	9	259	6.8	75	3.4	23.2	0	2	1	5.5	1	2	2	2	2	2	8.7	44	19.77	0.08	0.56	4.55	0.523
110616	14534.42342	14723.79016	2	17	1	12	4.3	78	15	25	16	100	67	0.66	2.7	5.05	11	32	127	282	4.1	4.2	141	0.2	9.4	183	7	168	5.4	31.2	NA	NA	2	NA	NA	NA	NA	1	NA	NA	8.3	119	6.97	NA	NA	NA	0.353
110617	23228.06464	23509.01347	1	75	3	22	4.4	65	22	27	14	100	36	1.05	3	4.72	35	93	130	281	4	4.4	141	0.3	9.3	201	7.4	206	5.2	23.5	1	2	2	NA	2	2	2	2	2	2	6.2	58	10.69	NA	NA	NA	0.451
110618	15824.13447	0	1	30	4	NA	NA	NA	NA	NA	NA	NA	NA	NA	NA	NA	NA	NA	NA	NA	NA	NA	NA	NA	NA	NA	NA	NA	NA	NA	NA	NA	2	NA	NA	NA	2	1	2	2	NA	NA	NA	NA	NA	NA	NA
110619	26333.03372	33986.10315	2	80	3	9	3.9	67	20	25	20	104	33	0.71	3.2	5.11	18	53	151	287	3.8	4.7	143	0.2	9.3	184	7.1	468	5.6	NA	NA	2	2	NA	1	2	2	2	2	2	141.7	154	92.01	0.08	0.56	2.8	0.278
110620	10803.47371	10985.0174	1	4	3	NA	NA	NA	NA	NA	NA	NA	NA	NA	NA	NA	NA	NA	NA	NA	NA	NA	NA	NA	NA	NA	NA	NA	NA	15.5	NA	NA	2	NA	NA	NA	NA	NA	NA	NA	9.4	87	10.8	1.47	0.56	2.74	NA
110621	50092.31814	54969.40017	1	62	3	17	3.6	51	16	27	16	105	150	1.17	2.7	5.27	20	78	133	292	4.3	4.1	146	0.4	8.7	199	6.3	102	9.2	27.5	NA	2	2	NA	2	2	2	2	2	2	4.4	63	6.98	0.08	0.56	1.58	0.625
110622	10684.22566	11442.81337	1	66	5	6	4.2	68	12	26	28	89	278	7.43	3.2	4.94	7	98	309	281	5.2	3.9	138	0.5	6.4	172	7.4	85	4.2	24.6	1	2	1	NA	2	2	2	2	2	1	NA	NA	NA	NA	NA	NA	NA
110623	9866.615965	10631.10772	1	14	4	18	4.7	168	24	26	7	103	282	0.79	2.4	4.88	17	68	NA	279	4.3	4.3	141	0.3	9.8	113	7.1	66	5	39.3	NA	NA	2	NA	NA	NA	NA	NA	NA	NA	2.2	195	1.13	0.46	0.56	41.11	1.116
110624	12694.87627	13202.37407	1	43	5	35	4.2	71	29	26	18	105	181	0.83	2.8	7.55	63	69	139	289	2.6	4.1	143	0.2	9	230	7	169	6.1	27.3	NA	2	2	7.88	NA	NA	2	2	2	2	8.8	154	5.71	NA	NA	NA	1.701
110625	44909.78765	48829.95323	2	78	3	14	4	106	15	29	22	100	61	1.29	3.1	5.27	30	87	188	284	2.9	4.3	141	0.3	9.7	250	7.1	140	7.5	36.6	0	1	2	NA	2	2	1	1	2	2	14.1	88	16.02	NA	NA	NA	0.921
110626	10309.74202	11114.56916	2	33	1	28	4	50	14	25	8	102	36	0.47	3.2	6.66	26	100	120	279	3.3	4.3	140	0.4	9.5	184	7.2	215	6	35.7	NA	NA	2	7.11	NA	NA	2	1	2	2	55.1	222	24.82	NA	NA	NA	0.233
110627	11354.0358	11793.61858	1	31	2	14	4.5	76	18	28	13	101	123	0.83	3.3	5.33	35	150	131	281	3.1	4.2	141	0.5	10.1	163	7.8	69	5.8	28.1	NA	NA	2	5.72	NA	NA	2	2	2	2	33.2	226	14.69	NA	NA	NA	0.639
110628	96335.72528	101008.3942	2	63	3	27	4.1	71	29	25	17	103	113	0.94	2.6	5.27	26	93	172	284	2.6	4.6	142	0.3	10	213	6.7	124	5	24.6	0	2	2	NA	1	2	2	2	2	2	1.3	13	10	NA	NA	NA	5.614
110629	10247.73533	12680.74746	2	80	3	26	4.1	75	41	24	21	96	195	0.77	2.4	4.88	27	51	243	271	3.6	4.2	134	0.3	9.4	207	6.5	69	6.1	25.6	0	1	2	5.5	1	2	1	1	2	2	12.5	27	46.3	NA	NA	NA	1.773
110630	15255.60672	16880.82701	1	11	4	NA	NA	NA	NA	NA	NA	NA	NA	NA	NA	NA	NA	NA	NA	NA	NA	NA	NA	NA	NA	NA	NA	NA	NA	32.9	NA	NA	2	NA	NA	NA	NA	NA	NA	NA	13	203	6.4	NA	NA	NA	NA
110631	166660.5259	179913.3391	2	55	3	NA	NA	NA	NA	NA	NA	NA	NA	NA	NA	NA	NA	NA	NA	NA	NA	NA	NA	NA	NA	NA	NA	NA	NA	28.2	0	2	2	5.77	2	2	2	2	2	2	15.5	137	11.31	0.08	0.56	27.3	0.2
110632	8175.858111	9378.87509	1	14	5	10	4.5	174	17	23	13	101	162	0.85	3.1	4.61	19	93	193	275	4.5	4	138	0.3	9.7	225	7.6	360	8.3	26.8	NA	NA	2	NA	NA	NA	NA	NA	NA	NA	6.6	201	3.28	1.99	0.56	17.34	1.421
110633	6587.935729	7016.15463	2	0	3	NA	NA	NA	NA	NA	NA	NA	NA	NA	NA	NA	NA	NA	NA	NA	NA	NA	NA	NA	NA	NA	NA	NA	NA	NA	NA	NA	NA	NA	NA	NA	NA	NA	NA	NA	NA	NA	NA	NA	NA	NA	NA
110634	5383.535094	6472.078599	1	10	4	NA	NA	NA	NA	NA	NA	NA	NA	NA	NA	NA	NA	NA	NA	NA	NA	NA	NA	NA	NA	NA	NA	NA	NA	23.5	NA	NA	2	NA	NA	NA	NA	NA	NA	NA	4.3	90	4.78	NA	NA	NA	0.103
110635	8070.148355	9395.286461	1	1	5	NA	NA	NA	NA	NA	NA	NA	NA	NA	NA	NA	NA	NA	NA	NA	NA	NA	NA	NA	NA	NA	NA	NA	NA	NA	NA	NA	2	NA	NA	NA	NA	NA	NA	NA	NA	NA	NA	NA	NA	NA	NA
110636	26966.83839	28177.46474	2	56	2	9	3.7	117	11	25	14	105	75	0.56	3.2	5.27	11	46	141	289	3.3	3.9	145	0.4	8.9	173	6.9	150	3.6	43.9	1	1	2	5.61	1	2	2	1	9	2	9.5	167	5.69	NA	NA	NA	NA
110637	18405.59719	18357.88476	2	49	3	14	4.3	105	15	23	23	100	75	0.98	3.4	5.38	14	47	150	281	3.8	4.4	139	0.2	10	152	7.7	129	5.3	56.5	NA	2	2	NA	NA	NA	2	1	2	2	24.1	117	20.6	0.08	0.56	3.38	0.42
110638	12781.28148	14038.3978	1	60	1	22	4	136	18	28	24	96	176	0.87	3.5	5.55	18	66	218	282	4	4.3	139	0.5	9.3	167	7.5	370	7.5	56.3	0	2	1	NA	2	2	2	1	2	2	134.2	73	183.84	NA	NA	NA	1.605
110639	87045.61007	96750.65376	1	52	3	60	4.1	52	33	25	17	102	61	0.66	2.8	4.94	51	182	155	279	3	4.1	139	0.8	8.5	154	6.9	103	5.3	32.6	0	2	2	5.55	2	2	2	1	2	2	10.2	161	6.34	NA	NA	NA	0.63
110640	34429.58636	35476.78855	2	59	3	14	3.8	65	15	25	8	104	137	0.88	3.2	5.27	34	51	179	281	3.3	4.3	142	0.2	9	222	7	131	5.1	32.2	NA	1	2	5.83	2	2	2	1	1	2	2.4	38	6.32	NA	NA	NA	1.55
110641	15300.59065	15840.54805	2	8	2	NA	NA	NA	NA	NA	NA	NA	NA	NA	NA	NA	NA	NA	NA	NA	NA	NA	NA	NA	NA	NA	NA	NA	NA	23.2	NA	NA	2	NA	NA	NA	NA	NA	NA	NA	5.4	58	9.31	NA	NA	NA	NA
110642	5896.215064	6181.654082	1	17	4	56	3.8	83	36	24	11	104	254	1.01	3.5	5.61	57	75	221	283	4.1	4.3	142	0.3	9.6	208	7.3	187	6.5	47.3	NA	NA	2	5.72	NA	NA	NA	1	NA	NA	9	256	3.52	NA	NA	NA	0.545
110643	12831.43356	13553.47442	2	9	1	NA	NA	NA	NA	NA	NA	NA	NA	NA	NA	NA	NA	NA	NA	NA	NA	NA	NA	NA	NA	NA	NA	NA	NA	16.8	NA	NA	2	NA	NA	NA	NA	NA	NA	NA	60.1	22	273.18	NA	NA	NA	NA
110644	3170.437087	3477.146452	1	2	4	NA	NA	NA	NA	NA	NA	NA	NA	NA	NA	NA	NA	NA	NA	NA	NA	NA	NA	NA	NA	NA	NA	NA	NA	16.3	NA	NA	2	NA	NA	NA	NA	NA	NA	NA	NA	NA	NA	NA	NA	NA	NA
110645	14149.42305	14630.68773	2	43	4	14	3.2	79	16	23	8	107	192	0.8	3.5	5.72	16	89	131	284	2.7	4.1	143	0.1	8.5	211	6.7	161	4.9	41.5	NA	2	2	NA	NA	NA	2	1	2	2	10.6	213	4.98	NA	NA	NA	NA
110646	6361.829986	7368.918522	1	14	4	12	4.7	175	15	27	12	103	184	0.73	3	4.77	13	90	113	286	4.5	4.3	144	0.4	10.3	152	7.7	44	5	19.4	NA	NA	2	NA	NA	NA	NA	NA	NA	NA	17.4	199	8.74	0.08	0.56	13.49	0.677
110647	6847.194533	7632.666033	2	0	2	NA	NA	NA	NA	NA	NA	NA	NA	NA	NA	NA	NA	NA	NA	NA	NA	NA	NA	NA	NA	NA	NA	NA	NA	NA	NA	NA	NA	NA	NA	NA	NA	NA	NA	NA	NA	NA	NA	NA	NA	NA	NA
110648	17033.86043	19802.28727	1	4	1	NA	NA	NA	NA	NA	NA	NA	NA	NA	NA	NA	NA	NA	NA	NA	NA	NA	NA	NA	NA	NA	NA	NA	NA	17.8	NA	NA	2	NA	NA	NA	NA	NA	NA	NA	4.8	33	14.55	0.08	0.56	2.63	NA
110649	121924.6831	130508.402	2	17	3	11	4.2	88	22	24	14	100	299	0.87	2.2	4.66	9	35	146	275	3.9	4.1	138	0.2	9	159	6.4	49	5.2	22.1	NA	NA	2	NA	NA	NA	NA	2	NA	NA	3.3	165	2	NA	NA	NA	0.639
110650	12409.03511	13109.44311	1	22	4	NA	NA	NA	NA	NA	NA	NA	NA	NA	NA	NA	NA	NA	NA	NA	NA	NA	NA	NA	NA	NA	NA	NA	NA	19.3	NA	NA	2	NA	NA	NA	2	2	2	2	13.6	153	8.89	0.77	0.56	3.15	1.028
110651	12043.93264	12816.20073	1	63	4	34	4	55	20	26	18	100	212	1.16	3.6	6.66	31	72	138	279	3.8	4.2	138	0.2	9.2	225	7.6	141	6.9	26.1	0	1	2	7.05	2	2	2	2	1	2	6.3	132	4.77	NA	NA	NA	0.61
110652	7771.085631	9425.791307	2	7	5	NA	NA	NA	NA	NA	NA	NA	NA	NA	NA	NA	NA	NA	NA	NA	NA	NA	NA	NA	NA	NA	NA	NA	NA	14	NA	NA	2	NA	NA	NA	NA	NA	NA	NA	4.7	40	11.75	NA	NA	NA	0.736
110653	15225.08794	16025.95993	1	38	4	18	3.7	114	19	24	13	102	96	0.87	3.8	4.61	17	107	132	281	3.4	3.9	141	0.3	9.3	149	7.5	54	4.8	20.3	NA	NA	2	NA	NA	NA	2	2	2	2	10.5	196	5.36	0.08	0.56	3.16	0.503
110654	2001.299465	2125.229325	2	0	4	NA	NA	NA	NA	NA	NA	NA	NA	NA	NA	NA	NA	NA	NA	NA	NA	NA	NA	NA	NA	NA	NA	NA	NA	NA	NA	NA	NA	NA	NA	NA	NA	NA	NA	NA	NA	NA	NA	NA	NA	NA	NA
110655	21631.45814	23332.27285	1	39	3	20	3.8	45	15	26	16	101	56	0.85	3.3	5.38	32	99	128	282	4.1	3.6	141	0.4	8.8	180	7.1	286	5.6	41.3	NA	NA	2	5.94	NA	NA	2	1	1	2	14.9	192	7.76	NA	NA	NA	0.927
110656	6344.413178	6958.99438	1	80	3	14	4	72	14	26	17	98	64	1	3.3	8.05	14	31	136	282	2.9	4.2	139	0.3	8.9	144	7.3	78	5	NA	NA	2	1	8.66	2	1	2	2	2	2	23.1	131	17.63	NA	NA	NA	0.655
110657	18465.6775	19432.43137	1	28	4	14	3.4	72	15	25	10	106	292	1.09	2.4	5.61	14	79	120	284	2.7	3.9	143	0.4	8.8	139	5.8	104	4.5	22.8	NA	NA	2	NA	NA	NA	2	2	2	2	3.8	159	2.39	NA	NA	NA	NA
110658	11650.865	11998.80292	2	61	4	17	4.2	135	15	24	13	102	71	0.77	3.2	3.83	10	59	195	280	4	3.9	141	0.4	9.4	199	7.4	91	4.7	29.1	NA	2	2	4.27	2	2	2	1	2	2	26.8	193	13.89	NA	NA	NA	0.413
110659	10949.96128	12540.83391	2	1	2	NA	NA	NA	NA	NA	NA	NA	NA	NA	NA	NA	NA	NA	NA	NA	NA	NA	NA	NA	NA	NA	NA	NA	NA	NA	NA	NA	2	NA	NA	NA	NA	NA	NA	NA	NA	NA	NA	NA	NA	NA	NA
110660	3376.429688	3886.400232	1	5	4	NA	NA	NA	NA	NA	NA	NA	NA	NA	NA	NA	NA	NA	NA	NA	NA	NA	NA	NA	NA	NA	NA	NA	NA	15.2	NA	NA	2	NA	NA	NA	NA	NA	NA	NA	10.2	32	31.88	0.08	0.56	2.72	NA
110661	29762.59246	30005.06457	1	47	3	NA	NA	NA	NA	NA	NA	NA	NA	NA	NA	NA	NA	NA	NA	NA	NA	NA	NA	NA	NA	NA	NA	NA	NA	52.3	NA	1	1	NA	NA	NA	2	1	2	2	34.7	129	26.9	0.08	0.56	3.76	1.353
110662	15949.58797	17057.14091	2	76	3	12	3.8	98	15	24	12	97	65	0.76	3.2	5.72	13	70	128	270	4.1	4.7	135	0.2	9.2	197	7	164	3.7	33.5	0	2	2	NA	1	1	1	9	2	2	28.7	89	32.25	NA	NA	NA	0.538
110663	24200.54256	27755.0025	1	59	3	15	4.1	74	14	23	20	104	155	1.18	2.7	10.55	41	102	129	287	3.3	4.3	140	0.2	9.3	214	6.8	331	5.5	29.9	1	1	1	NA	2	1	2	1	2	1	84.7	276	30.69	0.08	0.56	75.71	0.31
110664	11987.30226	12710.43022	1	48	5	NA	NA	NA	NA	NA	NA	NA	NA	NA	NA	NA	NA	NA	NA	NA	NA	NA	NA	NA	NA	NA	NA	NA	NA	28.4	NA	2	2	NA	NA	NA	2	1	2	2	8.3	268	3.1	NA	NA	NA	NA
110665	11797.94013	11727.95441	2	58	2	19	3.7	77	19	27	13	101	115	0.58	3.5	4.61	24	74	168	282	4	4	142	0.4	9.3	193	7.2	204	3.2	35.8	1	2	2	NA	2	2	2	2	2	2	4.1	26	15.77	NA	NA	NA	NA
110666	14180.66854	15512.91599	2	3	3	NA	NA	NA	NA	NA	NA	NA	NA	NA	NA	NA	NA	NA	NA	NA	NA	NA	NA	NA	NA	NA	NA	NA	NA	15.6	NA	NA	2	NA	NA	NA	NA	NA	NA	NA	11.3	31	36.45	0.08	0.56	1.84	NA
110667	7292.580647	7807.923803	1	15	5	9	4.4	187	26	24	14	100	599	0.87	2.7	4.72	9	50	105	277	4.2	4.1	139	0.2	9.6	138	7.1	79	8	22.2	NA	NA	2	NA	NA	NA	NA	NA	NA	NA	16.1	183	8.8	NA	NA	NA	1.018
110668	13526.3011	15281.3626	2	3	3	NA	NA	NA	NA	NA	NA	NA	NA	NA	NA	NA	NA	NA	NA	NA	NA	NA	NA	NA	NA	NA	NA	NA	NA	17.4	NA	NA	2	NA	NA	NA	NA	NA	NA	NA	9.5	25	38	0.08	0.56	2.29	NA
110669	27799.54906	29656.86447	1	30	4	13	3.3	72	13	26	9	103	248	0.81	2.2	4.94	21	74	139	281	4.7	4.5	142	0.2	8.9	164	5.5	156	4.6	36.3	NA	NA	2	NA	NA	NA	2	1	2	2	3.3	152	2.17	NA	NA	NA	0.864
110670	12137.19555	13250.34392	2	7	3	NA	NA	NA	NA	NA	NA	NA	NA	NA	NA	NA	NA	NA	NA	NA	NA	NA	NA	NA	NA	NA	NA	NA	NA	23.4	NA	NA	2	NA	NA	NA	NA	NA	NA	NA	NA	NA	NA	NA	NA	NA	NA
110671	8585.45233	8869.934917	1	15	5	27	4.3	97	18	27	8	103	82	0.89	2.9	4.94	19	32	148	283	3.8	4.2	143	0.5	9.8	184	7.2	114	6.5	25.7	NA	NA	2	NA	NA	NA	NA	NA	NA	NA	2.1	66	3.18	NA	NA	NA	NA
110672	29568.88123	35107.11604	2	80	3	10	4.1	48	15	23	15	102	108	0.93	2.6	5.61	15	110	132	280	3.4	4.1	140	0.5	9.9	190	6.7	156	4.7	29.1	1	2	2	NA	1	2	2	2	2	2	31.8	66	48.18	NA	NA	NA	0.329
110673	5126.470849	5377.689445	1	69	4	21	3.9	89	18	26	13	104	98	0.8	3.2	6.16	84	47	153	291	3.4	4.4	146	0.6	9.5	102	7.1	53	7.4	38.1	0	1	2	6.61	2	2	2	1	2	2	93.8	155	60.52	NA	NA	NA	0.715
110674	10113.00387	10913.51929	1	44	5	31	4.1	89	23	26	14	98	94	0.8	3.3	8.27	50	84	150	279	4.3	4.5	138	0.4	9.3	113	7.4	168	6.6	35.4	NA	1	1	NA	NA	NA	2	1	2	2	2.3	21	10.95	NA	NA	NA	1.902
110675	39538.18249	46812.06738	2	80	3	9	4	129	12	28	31	100	26	1.43	2.1	5.66	17	75	139	282	3.9	5.1	138	0.6	9.9	194	6.1	95	4.7	28.3	1	2	2	NA	1	2	1	1	2	2	265	74	358.11	0.08	0.56	2.23	0.696
110676	8540.983107	9296.848778	2	0	3	NA	NA	NA	NA	NA	NA	NA	NA	NA	NA	NA	NA	NA	NA	NA	NA	NA	NA	NA	NA	NA	NA	NA	NA	NA	NA	NA	NA	NA	NA	NA	NA	NA	NA	NA	NA	NA	NA	NA	NA	NA	NA
110677	4508.029943	4818.697204	1	13	4	18	3.9	213	17	28	8	100	168	0.71	3.7	5.77	28	40	193	282	4.8	4.4	142	0.2	9.6	200	7.6	86	7	48.2	NA	NA	2	6.11	NA	NA	NA	NA	NA	NA	3.3	98	3.37	0.08	0.56	2.93	2.682
110678	34943.73204	38488.32697	1	36	3	11	4.8	66	14	25	10	101	121	0.98	3	3.16	13	143	118	282	3.3	3.8	143	0.8	10.1	157	7.8	95	4.9	19.3	NA	NA	2	NA	NA	NA	2	2	2	2	11.2	160	7	0.08	0.56	3.67	NA
110679	39504.46214	43223.39781	2	11	3	NA	NA	NA	NA	NA	NA	NA	NA	NA	NA	NA	NA	NA	NA	NA	NA	NA	NA	NA	NA	NA	NA	NA	NA	21.1	NA	NA	2	NA	NA	NA	NA	NA	NA	NA	12.1	106	11.42	0.08	0.56	4.43	0.248
110680	29030.59463	0	2	4	1	NA	NA	NA	NA	NA	NA	NA	NA	NA	NA	NA	NA	NA	NA	NA	NA	NA	NA	NA	NA	NA	NA	NA	NA	NA	NA	NA	2	NA	NA	NA	NA	NA	NA	NA	NA	NA	NA	NA	NA	NA	NA
110681	18137.81418	21434.03819	1	28	3	20	4.2	65	20	27	7	102	103	0.86	3.2	4.66	15	99	132	278	2.9	4	141	0.4	9.1	172	7.4	78	4.7	20.6	NA	NA	2	NA	NA	NA	2	2	2	2	0.8	17	4.71	0.08	0.56	0.42	0.791
110682	3822.17205	4112.470226	1	54	4	17	3.9	64	28	26	17	105	323	1.3	3.1	4.83	13	77	NA	288	3.8	4.5	144	0.5	8.9	184	7	69	7.4	25.8	NA	2	2	4.88	2	2	2	2	2	2	25.1	255	9.84	NA	NA	NA	0.612
110683	36040.98393	40127.84179	1	56	3	NA	NA	NA	NA	NA	NA	NA	NA	NA	NA	NA	NA	NA	NA	NA	NA	NA	NA	NA	NA	NA	NA	NA	NA	NA	NA	2	2	NA	2	2	2	2	2	2	NA	NA	NA	NA	NA	NA	NA
110684	33828.85313	36680.09621	2	23	4	8	4.3	52	13	25	6	101	97	0.75	2.8	5.27	27	73	140	273	3.7	3.6	138	0.2	9.7	133	7.1	72	3.5	23.6	NA	NA	2	5.55	NA	NA	2	2	2	2	4.4	78	5.64	NA	NA	NA	0.051
110685	11858.22508	12621.12355	1	15	5	10	4.2	142	16	27	13	102	70	0.73	3	5.44	13	75	124	281	4.9	4.5	141	0.8	9.5	145	7.2	43	4.7	24.6	NA	NA	2	5.66	NA	NA	NA	NA	NA	NA	38.4	276	13.91	0.08	0.56	3.11	NA
110686	9488.49618	10253.69287	1	38	4	10	4.1	53	19	27	8	105	198	0.91	2.6	3.77	29	87	141	280	3.6	4	142	0.2	8.7	125	6.7	85	3.9	22.2	NA	NA	2	NA	NA	NA	2	2	2	2	11.6	148	7.84	0.58	0.56	3.71	1
110687	9096.192946	9873.071341	1	61	4	19	3.9	95	13	26	19	101	156	1.38	3.8	5.27	37	51	116	281	3.8	3.1	140	0.4	9.3	106	7.7	58	6.2	39.5	1	2	2	NA	2	2	2	1	2	2	335.5	284	118.13	NA	NA	NA	NA
110688	10668.15559	11663.5596	2	34	5	11	4	68	15	23	14	96	105	0.8	3.6	3.77	16	18	136	265	3.2	3.6	133	0.2	8.6	158	7.6	72	3.8	18.7	NA	NA	2	NA	NA	NA	2	2	2	2	51.2	188	27.23	1.78	0.56	30.57	0.333
110689	11328.7104	13968.02091	1	6	3	NA	NA	NA	NA	NA	NA	NA	NA	NA	NA	NA	NA	NA	NA	NA	NA	NA	NA	NA	NA	NA	NA	NA	NA	19.1	NA	NA	2	NA	NA	NA	NA	NA	NA	NA	5.6	48	11.67	0.59	0.56	3.27	NA
110690	8491.517062	8972.021737	1	52	4	35	4.6	109	63	26	9	98	605	0.86	3.5	6.05	253	320	234	282	3.5	3.4	142	1.5	9	142	8.1	350	7.4	23.5	0	2	2	6.66	2	2	2	2	1	2	123.5	247	50	NA	NA	NA	0.737
110691	50513.53534	0	2	68	3	NA	NA	NA	NA	NA	NA	NA	NA	NA	NA	NA	NA	NA	NA	NA	NA	NA	NA	NA	NA	NA	NA	NA	NA	NA	NA	2	2	NA	2	2	2	2	2	2	NA	NA	NA	NA	NA	NA	NA
110692	34977.06254	38877.99925	1	27	5	15	4.2	83	24	27	11	100	457	1.19	2.8	4.77	43	78	141	286	4.3	4	144	0.3	9.1	182	7	85	5	18.9	NA	NA	2	NA	NA	NA	2	2	2	2	4.9	132	3.71	NA	NA	NA	1.18
110693	8056.536749	8493.959445	1	17	5	18	4.5	87	19	25	6	103	135	1.03	2.7	5.11	16	58	121	279	5.1	4.1	141	0.2	9.3	150	7.2	218	5.7	26	NA	NA	2	5.44	NA	NA	NA	2	NA	NA	7.9	168	4.7	NA	NA	NA	0.168
110694	8537.927066	9065.311544	2	16	4	10	3.7	70	13	24	15	103	94	0.85	3	4.94	10	47	167	280	4.4	4.5	140	0.1	9.1	123	6.7	74	4.7	44.8	NA	NA	2	NA	NA	NA	NA	1	NA	NA	61.1	247	24.74	NA	NA	NA	NA
110695	18242.3473	19514.50661	2	12	3	NA	NA	NA	NA	NA	NA	NA	NA	NA	NA	NA	NA	NA	NA	NA	NA	NA	NA	NA	NA	NA	NA	NA	NA	20.9	NA	NA	2	NA	NA	NA	NA	NA	NA	NA	2.3	34	6.76	0.08	0.56	1.01	0.32
110696	4716.050074	5507.018341	1	13	5	13	5.2	238	24	22	17	97	342	0.64	2.8	6.38	9	90	177	276	4.3	3.3	137	0.7	10.1	199	8	110	5.5	18.1	NA	NA	2	NA	NA	NA	NA	NA	NA	NA	41.6	209	19.9	0.08	0.56	5.09	0.526
110697	18491.06144	19024.87905	1	17	5	NA	NA	NA	NA	NA	NA	NA	NA	NA	NA	NA	NA	NA	NA	NA	NA	NA	NA	NA	NA	NA	NA	NA	NA	17.1	NA	NA	2	NA	NA	NA	NA	2	NA	NA	3370	295	1142.37	NA	NA	NA	0.247
110698	11163.59679	11306.27993	2	67	4	18	4	82	19	27	23	104	71	1.29	2.7	6.11	19	52	216	291	3.9	4.4	144	0.4	9.1	147	6.7	74	5.2	30.2	1	1	1	6.77	2	1	2	1	2	2	146.6	52	281.92	NA	NA	NA	1.127
110699	7701.698061	8157.115512	2	56	4	12	3.5	71	13	24	13	97	50	0.63	3.3	4.88	46	78	118	279	3.2	3.2	140	0.2	8.9	174	6.8	141	5.7	39.9	0	1	1	NA	2	2	2	1	2	2	15	68	22.06	NA	NA	NA	1.125
110700	3028.109814	3236.138647	1	68	4	15	4	76	15	22	18	102	129	1.16	3.2	6.83	30	85	143	285	2.9	4.1	141	0.5	9.7	190	7.2	101	5.3	28.7	0	2	1	NA	2	2	2	2	2	2	13.7	198	6.92	NA	NA	NA	0.865
110701	16360.79719	0	1	5	2	NA	NA	NA	NA	NA	NA	NA	NA	NA	NA	NA	NA	NA	NA	NA	NA	NA	NA	NA	NA	NA	NA	NA	NA	NA	NA	NA	2	NA	NA	NA	NA	NA	NA	NA	NA	NA	NA	NA	NA	NA	NA
110702	15586.91334	17466.31845	1	39	4	18	4.1	64	18	29	18	102	211	0.92	3.4	6.66	26	102	133	286	3.8	4.2	142	1.3	9.8	213	7.5	127	8.8	31	NA	NA	2	7.22	NA	NA	2	2	2	2	6	159	3.77	0.08	0.56	12.58	NA
110703	5200.056534	5267.945929	1	78	4	13	4.2	70	22	25	20	105	353	2.21	4.1	6.27	16	53	159	288	2.6	4.2	143	0.4	8.3	145	8.3	92	5.7	25.5	0	2	1	6.44	2	2	2	2	2	1	79.1	40	197.75	NA	NA	NA	1.246
110704	7279.566287	7733.656223	1	63	4	23	3.9	65	24	23	8	97	235	1.06	3.2	4.88	23	58	159	264	3.8	4.4	133	0.3	9.2	125	7.1	82	4.3	24.1	0	2	2	5.77	2	2	2	2	2	2	0.8	20	4	0.08	0.56	1.34	0.242
110705	9256.633139	10568.92919	1	40	5	15	4.3	81	15	28	10	105	75	1.03	2.9	4.66	19	62	133	279	3.3	4.4	141	0.8	9.4	161	7.2	63	7.1	23.5	NA	2	2	5.22	NA	NA	2	2	1	2	0.3	24	1.25	NA	NA	NA	1.441
110706	30024.55548	32895.26924	1	51	2	27	4.7	53	23	26	15	98	156	1	2.4	4.44	21	84	127	275	3.5	4.4	138	0.4	9.7	213	7.1	215	5.2	27.3	0	2	2	NA	2	2	2	2	2	2	2.4	53	4.53	NA	NA	NA	0.526
110707	6319.975202	7336.031426	1	7	5	NA	NA	NA	NA	NA	NA	NA	NA	NA	NA	NA	NA	NA	NA	NA	NA	NA	NA	NA	NA	NA	NA	NA	NA	22.1	NA	NA	2	NA	NA	NA	NA	NA	NA	NA	7	49	14.29	NA	NA	NA	NA
110708	3598.379411	0	1	69	1	NA	NA	NA	NA	NA	NA	NA	NA	NA	NA	NA	NA	NA	NA	NA	NA	NA	NA	NA	NA	NA	NA	NA	NA	NA	NA	2	2	NA	2	2	2	2	2	2	NA	NA	NA	NA	NA	NA	NA
110709	24526.57214	25316.09468	1	70	3	14	4.1	66	26	28	17	103	142	0.81	2.7	4.61	21	70	214	284	2.8	4.7	142	0.9	9.2	146	6.8	49	4.2	34.3	0	1	2	NA	2	2	1	1	2	2	14.1	118	11.95	0.54	1.24	8.46	0.533
110710	3572.347922	3888.524931	1	69	4	18	4.6	46	NA	28	12	99	233	0.79	2.7	5.33	24	71	NA	286	3.2	3.4	144	0.3	9.9	135	7.3	121	7.8	26.7	1	1	1	NA	2	2	2	2	2	2	2.9	28	10.36	0.08	0.56	2.76	2.568
110711	14344.49377	14264.75853	2	40	1	10	3.9	94	13	29	13	101	56	0.85	3.6	3.72	8	86	162	289	4.1	3.9	146	0.3	8.8	264	7.5	108	4.4	32.7	NA	2	2	NA	NA	NA	2	1	1	2	11.9	166	7.17	1.66	0.56	18.28	0.656
110712	15191.6651	14961.50814	2	59	1	21	3.9	130	18	26	16	105	59	0.48	3	5.22	30	141	146	290	3.4	4.2	145	0.5	9.3	183	6.9	87	2.6	25.9	0	2	2	5.88	2	2	2	2	2	2	4.3	113	3.81	NA	NA	NA	0.322
110713	23565.99676	24774.84153	2	26	5	16	4.2	57	21	25	13	102	54	0.73	3.8	4.39	12	102	113	280	3.7	4.1	141	0.4	9.4	243	8	107	5	22.3	NA	NA	2	4.94	NA	NA	2	2	2	2	7.8	106	7.36	NA	NA	NA	0.675
110714	27842.06953	29358.39363	2	67	5	14	4	71	22	25	14	102	174	0.86	3.2	5.72	13	62	175	284	4	4	142	0.2	9.7	200	7.2	126	5.8	27	1	2	2	NA	1	2	2	2	2	2	1.1	23	4.78	0.08	0.56	1.1	1.616
110715	5581.381111	6069.84143	1	55	5	27	3.9	40	23	30	14	102	120	0.9	3.1	4.66	21	142	63	285	3.3	4.6	143	0.7	9.1	183	7	84	5.6	22.5	0	2	2	5.16	2	2	2	2	2	2	5	126	3.97	NA	NA	NA	2.262
110716	9065.514124	9529.94791	2	55	5	37	4.1	94	25	25	15	100	132	0.74	3.3	6.38	41	72	161	281	4.2	3.9	140	0.4	9.3	135	7.4	152	4.6	28.3	0	2	1	NA	2	2	2	1	2	2	6.3	82	7.68	1.11	0.56	24	1.224
110717	4835.628205	5050.75021	2	61	4	25	3.8	58	83	26	19	104	74	0.66	4.7	5.05	26	87	128	279	3.7	4.4	139	0.5	9.1	146	8.5	39	4.7	18.8	1	1	2	5.16	2	2	2	2	2	2	63.6	111	57.3	NA	NA	NA	0.831
110718	7247.003415	7792.275168	1	32	4	81	4.6	48	37	27	10	97	523	1.08	2.7	5.11	68	111	154	274	4.1	3.5	138	0.6	9.7	228	7.3	99	8	45	NA	NA	2	5.27	NA	NA	2	2	2	2	17.8	189	9.42	NA	NA	NA	1
110719	8694.30755	9079.290775	1	18	2	36	4.5	81	31	25	13	101	611	0.99	2.7	5.88	42	65	233	282	2.5	4.3	141	0.4	9.4	182	7.2	290	3.7	35.6	NA	NA	2	NA	NA	NA	NA	2	NA	NA	7	181	3.87	NA	NA	NA	0.759
110720	29935.05963	31475.42273	1	16	3	15	4.6	196	16	25	10	100	132	0.65	3.1	5.05	27	62	155	278	4.9	3.8	140	0.5	9.7	171	7.7	311	7.8	30.8	NA	NA	2	NA	NA	NA	NA	1	NA	NA	12.9	200	6.45	NA	NA	NA	NA
110721	12619.67319	13286.88265	2	80	5	11	3.8	76	21	30	13	97	110	0.68	3.6	5.66	11	79	184	283	3	3.5	142	0.5	9.4	221	7.4	234	2.4	23.2	NA	1	2	6.11	1	1	2	2	2	2	68.6	26	263.85	0.08	0.56	46.09	1.402
110722	59804.46605	66034.80272	1	25	1	43	3.5	102	29	31	11	102	213	0.88	3.8	4.94	46	72	218	286	4.5	4.7	144	0.2	9.1	146	7.3	216	7.7	47.6	NA	NA	2	5.55	NA	NA	2	2	2	2	2.7	77	3.51	NA	NA	NA	1.072
110723	8748.30274	8714.553536	1	73	5	20	4.1	98	23	29	17	100	49	0.81	3.5	5.11	31	145	147	286	3.3	4	143	0.5	9.5	209	7.6	89	5.6	24.5	0	2	2	NA	1	1	2	2	2	2	42.8	131	32.67	0.76	0.56	19.47	0.262
110724	15521.66879	16023.06684	2	36	5	NA	NA	NA	NA	NA	NA	NA	NA	NA	NA	NA	NA	NA	NA	NA	NA	NA	NA	NA	NA	NA	NA	NA	NA	25.2	NA	NA	3	NA	NA	NA	2	2	2	2	3.1	18	17.22	0.08	0.56	1.91	1.529
110725	16293.87591	0	2	7	5	NA	NA	NA	NA	NA	NA	NA	NA	NA	NA	NA	NA	NA	NA	NA	NA	NA	NA	NA	NA	NA	NA	NA	NA	NA	NA	NA	2	NA	NA	NA	NA	NA	NA	NA	NA	NA	NA	NA	NA	NA	NA
110726	4884.918751	5107.228342	1	62	4	14	3.6	52	18	24	11	104	153	1.04	2.5	5.88	11	75	129	277	2.8	3.9	139	0.3	8.8	111	6.1	130	5.8	25.4	0	2	3	NA	2	2	2	2	2	2	29.1	335	8.69	0.08	0.56	4.83	0.312
110727	18788.39419	19354.2182	2	16	1	19	3.9	107	20	24	8	105	151	0.77	3.4	4.88	21	63	177	283	3.3	4.4	143	0.4	9.5	167	7.3	66	5.9	33	NA	NA	2	5.38	NA	NA	NA	1	NA	NA	35.9	223	16.1	NA	NA	NA	0.438
110728	34502.39858	36662.01424	1	72	3	21	3.6	95	18	21	25	105	323	1.45	3.6	6	65	66	195	282	3.5	3.8	139	0.5	8.7	216	7.2	188	8.1	28.4	1	2	3	6.38	2	2	1	1	2	2	176.5	64	275.78	NA	NA	NA	0.981
110729	122188.1212	0	1	38	3	NA	NA	NA	NA	NA	NA	NA	NA	NA	NA	NA	NA	NA	NA	NA	NA	NA	NA	NA	NA	NA	NA	NA	NA	NA	NA	NA	2	NA	NA	NA	2	2	2	2	NA	NA	NA	NA	NA	NA	NA
110730	36058.71299	38299.54848	2	29	3	8	3.9	50	31	27	13	104	76	0.88	2.9	4.66	4	47	106	284	3.5	4.1	143	0.1	8.8	217	6.8	109	4.3	22.2	NA	NA	2	NA	NA	NA	2	2	2	2	10.6	169	6.27	1.12	0.56	12.23	NA
110731	22996.57653	0	1	3	3	NA	NA	NA	NA	NA	NA	NA	NA	NA	NA	NA	NA	NA	NA	NA	NA	NA	NA	NA	NA	NA	NA	NA	NA	NA	NA	NA	2	NA	NA	NA	NA	NA	NA	NA	NA	NA	NA	NA	NA	NA	NA
110732	64031.40756	74217.05442	2	10	3	NA	NA	NA	NA	NA	NA	NA	NA	NA	NA	NA	NA	NA	NA	NA	NA	NA	NA	NA	NA	NA	NA	NA	NA	19.7	NA	NA	3	NA	NA	NA	NA	NA	NA	NA	20.7	88	23.52	NA	NA	NA	NA
110733	10612.75643	11700.16913	1	0	3	NA	NA	NA	NA	NA	NA	NA	NA	NA	NA	NA	NA	NA	NA	NA	NA	NA	NA	NA	NA	NA	NA	NA	NA	NA	NA	NA	NA	NA	NA	NA	NA	NA	NA	NA	NA	NA	NA	NA	NA	NA	NA
110734	31939.87942	36384.84664	2	8	3	NA	NA	NA	NA	NA	NA	NA	NA	NA	NA	NA	NA	NA	NA	NA	NA	NA	NA	NA	NA	NA	NA	NA	NA	16.1	NA	NA	2	NA	NA	NA	NA	NA	NA	NA	13.1	89	14.72	NA	NA	NA	0.489
110735	10539.87163	12491.75462	1	2	1	NA	NA	NA	NA	NA	NA	NA	NA	NA	NA	NA	NA	NA	NA	NA	NA	NA	NA	NA	NA	NA	NA	NA	NA	20.8	NA	NA	2	NA	NA	NA	NA	NA	NA	NA	NA	NA	NA	NA	NA	NA	NA
110736	8934.094772	9311.173808	2	49	1	12	4	49	14	21	13	102	62	0.63	4.3	5.33	16	18	136	279	4.1	3.9	140	0.3	9.2	180	8.3	207	3.2	31	NA	2	2	NA	NA	NA	2	2	2	2	110.2	34	324.12	NA	NA	NA	1.425
110737	22083.85274	23622.9897	1	77	3	13	3.6	103	16	26	22	98	217	1.33	2.7	11.77	9	68	161	287	3	4	139	0.7	9.2	122	6.3	124	9.3	38.3	NA	1	1	12.2	2	2	1	1	2	1	4.4	50	8.8	NA	NA	NA	1.04
110738	16641.07199	0	2	60	3	NA	NA	NA	NA	NA	NA	NA	NA	NA	NA	NA	NA	NA	NA	NA	NA	NA	NA	NA	NA	NA	NA	NA	NA	NA	NA	1	1	NA	2	2	2	1	2	2	NA	NA	NA	NA	NA	NA	NA
110739	10484.77138	11761.93589	2	40	3	13	4.2	62	17	25	11	101	78	0.74	2.6	4.72	9	146	125	276	4	4.1	139	0.4	9.2	144	6.8	69	3.8	26.3	NA	2	2	5.22	NA	NA	2	2	2	2	2.5	30	8.33	NA	NA	NA	0.922
110740	2669.804017	3000.655454	1	12	4	17	4.2	150	25	27	8	102	129	0.44	2.6	6.16	9	46	197	278	4.3	4	140	0.2	9.9	183	6.8	61	3.4	13.8	NA	NA	2	NA	NA	NA	NA	NA	NA	NA	5.2	83	6.27	1.8	1.68	27.7	0.093
110741	3088.626657	3437.497646	2	5	4	NA	NA	NA	NA	NA	NA	NA	NA	NA	NA	NA	NA	NA	NA	NA	NA	NA	NA	NA	NA	NA	NA	NA	NA	21.2	NA	NA	2	NA	NA	NA	NA	NA	NA	NA	NA	NA	NA	NA	NA	NA	NA
110742	4060.292071	4073.812686	1	55	5	17	3.8	60	21	25	12	101	241	0.93	3	4.94	23	77	147	280	3.5	4.1	141	0.3	8.8	214	6.8	119	6.4	22.6	0	2	2	NA	2	2	2	2	2	2	1.1	40	2.75	NA	NA	NA	2.247
110743	12202.30494	12987.95591	1	13	4	11	4.8	291	22	23	15	101	127	0.66	3.4	4.72	11	102	189	285	5	4.3	143	0.9	9.9	163	8.2	51	5.1	18.4	NA	NA	2	5.44	NA	NA	NA	NA	NA	NA	42.7	237	18.02	NA	NA	NA	0.315
110744	5889.262054	6715.6106	1	80	3	15	4.1	71	26	25	26	101	92	1.33	3.1	4.88	31	88	309	285	3.5	4.3	141	0.7	9.2	215	7.2	120	7.5	25.8	1	2	2	5.16	2	2	2	2	2	2	73	131	55.73	NA	NA	NA	0.412
110745	16039.91484	17257.35236	2	17	4	20	4	123	26	21	10	104	487	0.69	2.9	4.22	15	34	202	275	3.7	4.2	139	0.1	8.9	158	6.9	149	3.4	32.4	NA	NA	3	NA	NA	NA	NA	1	NA	NA	24.5	285	8.6	NA	NA	NA	NA
110746	5535.092193	6489.447685	2	13	5	9	4.3	200	18	26	9	99	78	0.56	2.9	4.72	8	108	169	275	4.4	4.8	139	0.8	9.7	207	7.2	79	4.2	15.1	NA	NA	2	5.27	NA	NA	NA	NA	NA	NA	5.6	178	3.15	2.79	0.56	41.4	NA
110747	10437.07782	11879.71673	1	80	3	33	3.5	63	23	30	17	97	80	1.01	4.7	5.5	16	114	135	283	2.4	3.5	141	0.8	9.9	170	8.2	161	5.1	34.4	1	2	2	NA	2	2	1	1	2	1	175.2	39	449.23	NA	NA	NA	1.474
110748	6611.523924	7141.022995	2	24	4	13	4.2	61	17	26	8	103	103	0.6	3.1	4.16	14	50	165	276	3.9	3.8	140	0.4	8.8	123	7.3	51	3.1	20.3	NA	NA	2	NA	NA	NA	2	2	2	2	5.2	60	8.67	NA	NA	NA	1.231
110749	13220.36243	14770.30883	2	80	4	18	3.8	56	21	25	12	101	88	1.02	3.1	3.44	23	121	167	281	3.6	4.8	142	0.2	9.2	222	6.9	125	4.7	23.8	NA	2	2	NA	2	2	2	2	2	2	2.1	71	2.96	0.08	0.56	1.29	0.622
110750	6516.615166	7118.950199	1	52	2	23	4	101	20	29	16	102	166	1.11	3.3	5.44	27	107	132	284	5.1	4.3	142	0.3	9.8	223	7.3	96	6.9	31.5	NA	2	2	5.83	2	2	2	1	2	2	15.5	375	4.13	NA	NA	NA	0.166
110751	19635.52061	19871.04244	2	69	3	17	3.7	83	14	27	20	99	66	0.94	3.1	6.27	16	60	181	281	3.4	4.1	139	0.3	9.2	159	6.8	131	7.6	41.4	0	1	2	6.66	1	9	2	1	2	2	10.6	110	9.64	NA	NA	NA	0.386
110752	78121.13767	91032.37324	1	28	3	11	4.4	78	18	28	15	99	103	1.12	2.7	4.94	25	95	166	278	2.7	4.4	139	1.3	9.6	248	7.1	96	5.6	31.6	NA	NA	2	5.38	NA	NA	2	2	2	2	2.3	50	4.6	NA	NA	NA	1.603
110753	25106.35201	27863.83955	1	36	2	25	3.5	62	24	27	14	101	1150	0.94	3.3	4.83	8	84	228	277	5	4.8	139	0.4	9.1	272	6.8	178	3.1	29.4	NA	NA	2	5.33	NA	NA	2	2	2	2	13.8	258	5.35	NA	NA	NA	0.527
110754	10056.31284	11482.53423	2	1	5	NA	NA	NA	NA	NA	NA	NA	NA	NA	NA	NA	NA	NA	NA	NA	NA	NA	NA	NA	NA	NA	NA	NA	NA	NA	NA	NA	2	NA	NA	NA	NA	NA	NA	NA	NA	NA	NA	NA	NA	NA	NA
110755	8068.69178	9415.220902	2	8	5	NA	NA	NA	NA	NA	NA	NA	NA	NA	NA	NA	NA	NA	NA	NA	NA	NA	NA	NA	NA	NA	NA	NA	NA	17.2	NA	NA	2	NA	NA	NA	NA	NA	NA	NA	7.2	79	9.11	NA	NA	NA	NA
110756	11269.72709	12302.41262	1	17	5	41	4.5	114	32	28	13	102	105	0.63	2.8	5	15	84	143	281	4.5	4.8	141	0.5	9.6	157	7.3	80	5.7	19.3	NA	NA	2	5.44	NA	NA	NA	2	NA	NA	10.3	139	7.41	0.34	0.56	14.23	0.984
110757	8809.979814	8893.208924	1	45	3	NA	NA	NA	NA	NA	NA	NA	NA	NA	NA	NA	NA	NA	NA	NA	NA	NA	NA	NA	NA	NA	NA	NA	NA	58	NA	2	2	NA	NA	NA	2	1	2	2	17.4	230	7.57	NA	NA	NA	0.38
110758	14786.28605	17043.73636	2	5	2	NA	NA	NA	NA	NA	NA	NA	NA	NA	NA	NA	NA	NA	NA	NA	NA	NA	NA	NA	NA	NA	NA	NA	NA	16.8	NA	NA	2	NA	NA	NA	NA	NA	NA	NA	15.4	120	12.83	1.96	0.56	21.62	NA
110759	19219.03964	20772.3321	1	54	4	14	3.5	56	22	31	15	99	134	1.7	4.3	4.44	24	93	205	281	3.2	3.9	141	0.5	9.4	158	7.8	64	9	37.9	1	1	2	NA	2	2	2	1	2	2	31.2	111	28.11	0.08	0.56	27.28	NA
110760	14705.82295	16597.68813	1	28	1	18	3.9	78	18	23	13	103	111	0.88	3	5.22	16	127	103	283	4	4.2	142	0.5	9	165	6.9	62	6.5	31.3	NA	NA	2	5.33	NA	NA	2	2	2	2	5.3	126	4.21	1.73	0.56	5.3	1.5
110761	11375.0857	12251.31481	2	0	3	NA	NA	NA	NA	NA	NA	NA	NA	NA	NA	NA	NA	NA	NA	NA	NA	NA	NA	NA	NA	NA	NA	NA	NA	NA	NA	NA	NA	NA	NA	NA	NA	NA	NA	NA	NA	NA	NA	NA	NA	NA	NA
110762	26776.52738	28051.84105	1	66	3	26	3.9	71	19	23	16	104	91	1.06	2.6	9.27	21	78	147	290	3.7	3.9	143	0.5	8.7	115	6.5	123	5	41.1	0	2	1	9.71	2	2	1	1	2	2	84.6	140	60.43	0.08	0.56	18.44	0.686
110763	4941.70793	5577.796375	1	71	3	50	4	71	37	21	20	105	78	0.98	2.6	5.94	63	130	133	294	2.4	4.3	146	1	8.7	161	6.6	118	5.9	36.9	1	2	2	6.33	2	2	2	1	2	2	27.9	327	8.53	NA	NA	NA	0.115
110764	8548.429703	9108.422823	1	2	4	NA	NA	NA	NA	NA	NA	NA	NA	NA	NA	NA	NA	NA	NA	NA	NA	NA	NA	NA	NA	NA	NA	NA	NA	14.5	NA	NA	2	NA	NA	NA	NA	NA	NA	NA	NA	NA	NA	NA	NA	NA	NA
110765	10520.46886	10898.44776	2	59	4	13	4	85	17	25	11	104	83	0.57	3.5	5.5	35	73	196	286	3.3	4.2	144	0.3	9.4	261	7.5	107	4.2	31	0	1	2	NA	2	2	2	2	2	2	7.5	77	9.74	NA	NA	NA	0.179
110766	51054.97584	55250.28712	2	20	1	19	4.1	78	17	22	10	100	190	0.59	2.7	4.39	12	91	179	270	3.7	4	136	0.6	9.1	135	6.8	46	4.9	32.6	NA	NA	2	NA	NA	NA	2	1	2	2	16	109	14.68	NA	NA	NA	0.014
110767	34645.56221	0	1	9	3	NA	NA	NA	NA	NA	NA	NA	NA	NA	NA	NA	NA	NA	NA	NA	NA	NA	NA	NA	NA	NA	NA	NA	NA	NA	NA	NA	2	NA	NA	NA	NA	NA	NA	NA	NA	NA	NA	NA	NA	NA	NA
110768	6016.11152	0	2	15	4	NA	NA	NA	NA	NA	NA	NA	NA	NA	NA	NA	NA	NA	NA	NA	NA	NA	NA	NA	NA	NA	NA	NA	NA	NA	NA	NA	2	NA	NA	NA	NA	NA	NA	NA	NA	NA	NA	NA	NA	NA	NA
110769	7670.416467	8465.604507	2	18	4	11	4	58	15	25	12	99	126	0.64	3.4	4.72	12	44	163	275	3.3	4	138	0.2	9.3	134	7.4	43	3.7	24.4	NA	NA	2	NA	NA	NA	NA	2	NA	NA	15.3	202	7.57	NA	NA	NA	1.155
110770	17732.40396	19455.40896	1	67	5	7	3.8	62	20	26	20	105	169	1.11	2.9	5.5	14	76	188	288	3.5	4.5	143	0.3	9.2	189	6.7	73	5.6	24.1	1	2	3	5.72	1	2	2	2	2	2	3	82	3.66	1.08	0.56	35.51	1.478
110771	15195.86805	15463.9622	2	34	4	9	3.9	49	17	24	11	102	162	0.73	3.6	4.72	18	117	124	274	3.3	3.7	138	0.3	9	184	7.5	49	3.9	30.8	NA	NA	2	NA	NA	NA	2	2	2	2	97.5	359	27.16	NA	NA	NA	0.554
110772	14502.62719	15606.92801	2	11	1	NA	NA	NA	NA	NA	NA	NA	NA	NA	NA	NA	NA	NA	NA	NA	NA	NA	NA	NA	NA	NA	NA	NA	NA	17.5	NA	NA	2	NA	NA	NA	NA	NA	NA	NA	7.5	165	4.55	NA	NA	NA	0.236
110773	15816.78845	16517.41469	2	18	2	11	4.3	56	16	26	11	104	75	0.61	3.4	4.77	7	102	130	282	4.2	4	142	0.6	10	130	7.7	57	3.4	20	NA	NA	2	NA	NA	NA	NA	2	NA	NA	11.3	179	6.31	0.19	0.56	24.87	NA
110774	6674.33887	6865.703962	2	15	2	NA	NA	NA	NA	NA	NA	NA	NA	NA	NA	NA	NA	NA	NA	NA	NA	NA	NA	NA	NA	NA	NA	NA	NA	23.9	NA	NA	2	NA	NA	NA	NA	NA	NA	NA	32.7	176	18.58	NA	NA	NA	0.453
110775	32093.77767	35283.73619	1	71	2	38	4.4	118	32	27	13	98	144	0.84	2.8	5.88	326	145	178	274	3.1	4.1	137	0.7	10	203	7.2	147	7.3	33.4	1	1	1	6.33	2	2	2	1	2	2	4.4	58	7.59	0.37	0.56	6.68	2.345
110776	5993.000186	6461.17212	2	62	5	NA	NA	NA	NA	NA	NA	NA	NA	NA	NA	NA	NA	NA	NA	NA	NA	NA	NA	NA	NA	NA	NA	NA	NA	23.8	0	2	1	NA	2	2	2	2	2	2	8.5	36	23.61	NA	NA	NA	1.344
110777	9669.444638	10196.04277	2	69	4	11	3.8	94	19	24	23	103	336	1.34	3.7	4.72	13	59	202	286	3.3	4.5	142	0.3	9.1	172	7.5	83	6.5	30.4	1	2	2	NA	2	1	2	1	2	2	3.3	53	6.23	NA	NA	NA	0.786
110778	34949.72262	39233.78789	1	80	3	13	3.6	99	18	23	16	102	136	1.79	2.6	7.22	18	54	122	279	3.1	4.8	138	0.4	8.8	143	6.2	128	8.4	36.9	1	2	1	7.49	2	2	1	1	2	1	103.5	115	90	NA	NA	NA	0.891
110779	26672.15685	29750.67027	2	70	3	17	4.3	85	24	28	11	98	137	0.7	3	5.05	9	84	161	278	4	3.8	140	0.4	9.4	227	7.3	105	3.8	24.3	0	2	2	NA	2	2	2	2	2	2	2	20	10	0.08	0.56	0.95	0.688
110780	4472.274345	4697.866907	2	37	4	21	3.6	69	18	27	5	104	190	0.77	3.1	4.55	79	57	175	279	3.3	3.3	142	0.2	8.9	234	6.7	86	4.1	34.6	NA	NA	2	NA	NA	NA	2	1	2	2	31.3	391	8.01	NA	NA	NA	0.072
110781	74454.67587	78211.57294	1	62	3	20	4.2	58	19	26	22	100	259	1.28	2.8	5.27	23	91	168	281	4.2	4.8	139	0.3	9.6	235	7	352	8.2	35.3	1	1	2	5.83	2	2	2	2	2	2	6	150	4	NA	NA	NA	0.402
110782	5495.209602	0	1	60	4	NA	NA	NA	NA	NA	NA	NA	NA	NA	NA	NA	NA	NA	NA	NA	NA	NA	NA	NA	NA	NA	NA	NA	NA	NA	NA	1	2	NA	2	2	2	2	2	2	NA	NA	NA	NA	NA	NA	NA
110783	8037.531992	9044.376922	1	5	3	NA	NA	NA	NA	NA	NA	NA	NA	NA	NA	NA	NA	NA	NA	NA	NA	NA	NA	NA	NA	NA	NA	NA	NA	15	NA	NA	2	NA	NA	NA	NA	NA	NA	NA	12.1	91	13.3	0.08	0.56	5.32	NA
110784	11472.04393	11800.76087	2	32	4	12	3.9	72	13	19	13	102	93	0.78	3.2	4.44	16	117	142	271	3.5	3.8	136	0.4	8.8	196	7.1	62	2.8	25.3	NA	NA	2	4.83	NA	NA	2	1	2	2	2.9	63	4.6	NA	NA	NA	1.412
110785	24213.05645	29036.20175	1	26	5	49	4.3	73	29	28	16	100	106	0.88	3.7	6.33	43	78	176	287	3.3	4	143	0.8	9.3	161	8	409	9.3	42.3	NA	NA	2	6.94	NA	NA	2	1	2	2	49.7	229	21.7	0.61	1.03	46.19	NA
110786	13011.40075	0	1	7	4	NA	NA	NA	NA	NA	NA	NA	NA	NA	NA	NA	NA	NA	NA	NA	NA	NA	NA	NA	NA	NA	NA	NA	NA	NA	NA	NA	2	NA	NA	NA	NA	NA	NA	NA	NA	NA	NA	NA	NA	NA	NA
110787	39189.94561	0	1	10	3	NA	NA	NA	NA	NA	NA	NA	NA	NA	NA	NA	NA	NA	NA	NA	NA	NA	NA	NA	NA	NA	NA	NA	NA	NA	NA	NA	2	NA	NA	NA	NA	NA	NA	NA	NA	NA	NA	NA	NA	NA	NA
110788	3578.58566	3887.351391	1	7	4	NA	NA	NA	NA	NA	NA	NA	NA	NA	NA	NA	NA	NA	NA	NA	NA	NA	NA	NA	NA	NA	NA	NA	NA	16.1	NA	NA	2	NA	NA	NA	NA	NA	NA	NA	8.5	93	9.14	0.4	0.56	9.48	1.4
110789	13743.61131	14329.72774	2	36	1	10	4	120	13	27	10	98	73	0.6	3.3	5.11	26	28	127	271	3.4	3.4	136	0.3	9	173	7.3	110	5.4	32.9	NA	NA	1	NA	NA	NA	2	1	2	2	30.7	8	383.75	NA	NA	NA	1.692
110790	51182.67329	55639.83923	1	13	3	19	4.5	279	18	22	12	104	190	0.8	2.5	4.22	10	35	170	280	4.7	4.6	141	0.3	9.2	131	7	68	5	25.2	NA	NA	2	NA	NA	NA	NA	NA	NA	NA	13.7	234	5.85	NA	NA	NA	0.512
110791	9435.967448	10579.72322	2	56	5	13	3.8	76	14	22	12	103	75	0.57	2.3	4.61	30	84	134	276	3.6	3.8	139	0.4	8.3	200	6.1	57	4	24.5	0	2	2	NA	2	2	2	2	2	2	3.1	51	6.08	NA	NA	NA	0.526
110792	6766.822361	7706.643587	2	44	5	9	4.4	47	13	23	15	99	106	0.66	3.2	4.61	10	104	106	274	4.3	3.9	137	0.7	9.4	224	7.6	73	4.7	19.4	NA	2	2	NA	NA	NA	2	2	2	2	3.5	49	7.14	NA	NA	NA	1.966
110793	7736.745261	8578.025228	1	7	5	NA	NA	NA	NA	NA	NA	NA	NA	NA	NA	NA	NA	NA	NA	NA	NA	NA	NA	NA	NA	NA	NA	NA	NA	15.9	NA	NA	2	NA	NA	NA	NA	NA	NA	NA	0.7	11	6.36	NA	NA	NA	NA
110794	6540.180513	6594.1919	2	58	2	26	3.8	202	17	25	15	101	100	0.59	3.6	11.93	26	70	183	292	3.4	4.2	143	0.2	9.2	195	7.4	193	5.2	44.6	1	2	2	NA	2	2	2	1	2	2	52	35	148.57	NA	NA	NA	NA
110795	4900.376381	4970.151147	2	47	4	9	3.8	67	15	22	14	105	154	0.7	3.9	5.22	12	20	197	283	3.3	3.9	142	0.5	9.1	160	7.7	80	5.5	38.5	NA	1	2	NA	NA	NA	2	2	2	2	4270	284	1503.52	NA	NA	NA	0.248
110796	16119.44751	15773.1402	2	50	1	28	3.9	76	23	24	18	101	93	0.54	3.2	5.55	32	98	101	276	4	4	137	0.4	9.3	183	7.1	253	4.4	33.1	1	2	2	5.72	2	2	2	1	2	2	8.1	113	7.17	NA	NA	NA	0.475
110797	8176.683446	0	2	80	1	NA	NA	NA	NA	NA	NA	NA	NA	NA	NA	NA	NA	NA	NA	NA	NA	NA	NA	NA	NA	NA	NA	NA	NA	NA	NA	2	3	NA	2	2	2	1	2	2	NA	NA	NA	NA	NA	NA	NA
110798	15302.7584	17118.65858	1	25	5	NA	NA	NA	NA	NA	NA	NA	NA	NA	NA	NA	NA	NA	NA	NA	NA	NA	NA	NA	NA	NA	NA	NA	NA	23.1	NA	NA	2	5.5	NA	NA	1	2	2	2	16.7	317	5.27	0.08	0.56	11.08	NA
110799	75636.6263	0	1	61	5	NA	NA	NA	NA	NA	NA	NA	NA	NA	NA	NA	NA	NA	NA	NA	NA	NA	NA	NA	NA	NA	NA	NA	NA	NA	NA	2	2	NA	2	2	2	1	2	2	NA	NA	NA	NA	NA	NA	NA
110800	20258.20723	22939.46149	1	22	3	15	4.7	72	18	25	15	103	75	0.99	3	5	11	82	127	283	3.9	4.1	142	0.9	9.4	184	7.7	57	6	25.3	NA	NA	2	5.44	NA	NA	2	2	2	2	11.1	307	3.62	NA	NA	NA	0.3
110801	11695.74589	0	1	9	4	NA	NA	NA	NA	NA	NA	NA	NA	NA	NA	NA	NA	NA	NA	NA	NA	NA	NA	NA	NA	NA	NA	NA	NA	NA	NA	NA	2	NA	NA	NA	NA	NA	NA	NA	NA	NA	NA	NA	NA	NA	NA
110802	4281.067319	5121.753398	2	5	5	NA	NA	NA	NA	NA	NA	NA	NA	NA	NA	NA	NA	NA	NA	NA	NA	NA	NA	NA	NA	NA	NA	NA	NA	14.1	NA	NA	2	NA	NA	NA	NA	NA	NA	NA	9.2	74	12.43	1.27	0.56	3.57	NA
110803	32673.97071	40386.52853	2	80	3	18	4.2	86	22	29	17	104	54	0.51	2.8	5.83	15	90	167	291	3.8	4	145	0.6	9.3	217	7	89	3.4	24.5	1	1	3	6.11	1	2	1	9	2	2	24.8	164	15.12	NA	NA	NA	0.15
110804	16011.74188	18982.7626	2	80	3	11	3.9	135	19	25	10	102	46	0.79	3.1	5.5	41	93	158	280	3.6	3.6	141	0.6	9.3	279	7	112	7.6	24.6	NA	2	2	5.77	1	2	2	2	2	2	5	40	12.5	NA	NA	NA	0.875
110805	4986.365011	5300.672285	2	64	1	11	3.5	110	16	23	15	99	64	0.65	3.2	5.44	18	54	133	278	4	3.5	139	0.2	9.4	143	6.7	213	4.5	27.8	1	1	2	NA	2	2	1	2	2	2	11.9	139	8.56	0.82	0.56	11.75	0.344
110806	39660.28525	44283.27573	2	53	3	13	4.1	118	14	29	8	97	49	0.49	2.9	5.94	22	36	124	278	4	3.7	140	0.2	9.1	262	7	352	4.8	37.6	0	1	2	6.27	2	2	2	1	2	2	4	24	16.67	NA	NA	NA	0.214
110807	7509.376853	8316.856984	2	77	5	10	3.8	113	12	26	22	103	37	0.86	2.8	5.22	11	106	125	286	2.8	4.3	142	0.3	9.3	232	6.6	66	6	NA	NA	1	2	5.5	1	2	2	1	2	2	4.5	66	6.82	0.08	0.56	20.35	NA
110808	8653.030596	9038.234843	2	13	3	13	4.5	108	16	22	11	101	27	0.66	2.9	4.55	19	111	124	276	3.9	4.2	139	0.4	10	153	7.4	179	4.2	24.6	NA	NA	2	5.11	NA	NA	NA	NA	NA	NA	NA	NA	NA	NA	NA	NA	NA
110809	18856.08352	23413.91235	1	80	3	8	3.9	110	11	23	30	106	35	1.17	2.4	6	10	77	137	290	3.1	4.3	142	0.6	8.7	104	6.3	142	5.4	NA	NA	2	2	NA	2	2	2	2	2	2	NA	NA	NA	NA	NA	NA	NA
110810	8098.3382	8314.811187	1	70	4	32	4	56	20	32	28	94	104	1.13	2.6	6.55	62	87	186	297	4.6	2.9	146	0.5	10.2	189	6.6	104	15.1	35.6	1	2	1	NA	2	2	2	1	2	2	4.6	25	18.4	NA	NA	NA	50.5
110811	30379.29783	29964.92476	2	45	2	36	4.1	93	22	28	10	98	70	0.54	3.6	5.11	79	121	149	278	4	4	140	0.3	9.2	228	7.7	60	4.6	27.2	NA	1	2	NA	NA	NA	2	1	2	2	0.9	17	5.29	0.08	0.56	2.06	NA
110812	3598.515451	4132.357193	1	9	4	NA	NA	NA	NA	NA	NA	NA	NA	NA	NA	NA	NA	NA	NA	NA	NA	NA	NA	NA	NA	NA	NA	NA	NA	17	NA	NA	2	NA	NA	NA	NA	NA	NA	NA	134.8	183	73.66	0.21	0.56	5.56	0.149
110813	3482.326286	3721.559444	1	66	4	11	3.5	103	16	28	14	104	273	1.06	3.6	5.5	27	46	150	287	3.4	3.7	144	0.4	9.2	168	7.1	93	6.2	34.7	0	1	2	5.94	2	2	2	1	2	2	2.6	88	2.95	0.08	0.56	1.65	1.886
110814	98407.87309	111930.5424	1	21	3	29	3.9	93	16	24	19	107	60	1.66	2.4	4.88	20	109	130	285	3.2	4.5	142	0.4	8.6	140	6.3	223	9.6	42.5	NA	NA	2	NA	NA	NA	2	1	2	1	144.8	98	147.76	NA	NA	NA	1.115
110815	20480.30899	21184.30062	2	13	1	26	4	175	23	23	15	101	77	0.61	3.3	4.5	18	116	192	279	4.5	4.3	140	0.2	9.2	170	7.3	92	5.4	40.8	NA	NA	2	NA	NA	NA	NA	NA	NA	NA	6	106	5.66	0.08	0.56	26.46	0.491
110816	14128.62877	15380.13486	2	29	4	7	4.4	75	12	23	11	102	91	0.53	3.2	5.05	10	75	114	278	3.4	3.9	140	0.2	9.2	148	7.6	56	3	30.7	NA	NA	2	NA	NA	NA	2	2	2	2	18.2	223	8.16	NA	NA	NA	0.568
110817	9275.593297	9277.236828	2	2	3	NA	NA	NA	NA	NA	NA	NA	NA	NA	NA	NA	NA	NA	NA	NA	NA	NA	NA	NA	NA	NA	NA	NA	NA	15	NA	NA	2	NA	NA	NA	NA	NA	NA	NA	NA	NA	NA	NA	NA	NA	NA
110818	3788.194119	4378.727113	2	2	4	NA	NA	NA	NA	NA	NA	NA	NA	NA	NA	NA	NA	NA	NA	NA	NA	NA	NA	NA	NA	NA	NA	NA	NA	NA	NA	NA	2	NA	NA	NA	NA	NA	NA	NA	NA	NA	NA	NA	NA	NA	NA
110819	44978.40234	47483.83597	2	35	1	17	4	55	14	24	22	105	95	0.98	2.9	4.22	25	201	134	287	4.1	4.2	143	0.8	9.5	177	6.9	313	4.9	27.1	NA	NA	2	NA	NA	NA	2	2	2	2	3.6	168	2.14	0.59	0.56	13.72	0.119
110820	5899.184396	6384.967481	1	63	1	18	4.2	132	13	28	13	99	49	0.74	3	8.27	26	61	136	282	2.9	4.6	140	0.3	9.2	112	7.2	96	4.6	34.3	0	1	1	NA	2	2	2	1	2	2	13.8	51	27.06	0.14	0.56	2.29	0.219
110821	31290.62759	32169.00286	2	79	3	18	3.4	110	31	25	25	100	70	1.07	4.6	5.11	147	115	779	282	3.6	4.2	139	0.7	9.1	166	8	110	4.6	31.9	0	2	1	5.66	1	2	2	1	2	1	30.3	58	52.24	NA	NA	NA	0.367
110822	8036.822394	8112.954651	1	73	3	36	4.3	87	40	23	26	94	56	1.18	3	8.1	54	29	161	276	3.3	4	134	0.2	9.1	141	7.3	79	4	25.7	0	1	1	8.38	2	2	1	2	1	9	82.1	284	28.91	0.43	0.56	5.15	0.286
110823	11864.99978	12481.43772	2	8	4	NA	NA	NA	NA	NA	NA	NA	NA	NA	NA	NA	NA	NA	NA	NA	NA	NA	NA	NA	NA	NA	NA	NA	NA	24.3	NA	NA	2	NA	NA	NA	NA	NA	NA	NA	16.9	95	17.79	NA	NA	NA	0.494
110824	7957.244139	8512.959658	2	37	4	19	3	48	17	22	11	101	57	0.58	3.6	4.11	9	82	140	274	4	4.3	138	0.3	8.9	175	6.6	83	3.4	32.7	NA	NA	2	NA	NA	NA	2	2	2	2	8.8	145	6.07	NA	NA	NA	NA
110825	14157.09715	16498.39401	1	4	2	NA	NA	NA	NA	NA	NA	NA	NA	NA	NA	NA	NA	NA	NA	NA	NA	NA	NA	NA	NA	NA	NA	NA	NA	18.2	NA	NA	2	NA	NA	NA	NA	NA	NA	NA	2.7	40	6.75	0.08	0.56	4.61	NA
110826	17860.3295	19774.16439	2	26	1	18	3.6	69	17	22	11	103	92	0.59	2.8	4.83	10	59	124	280	3.9	3.9	141	0.2	9	207	6.4	206	4.1	34.9	NA	NA	2	NA	NA	NA	2	2	2	2	19.6	88	22.27	NA	NA	NA	NA
110827	6507.958453	7762.888088	1	11	5	NA	NA	NA	NA	NA	NA	NA	NA	NA	NA	NA	NA	NA	NA	NA	NA	NA	NA	NA	NA	NA	NA	NA	NA	14.5	NA	NA	2	NA	NA	NA	NA	NA	NA	NA	22.4	165	13.58	1.19	0.56	14.38	NA
110828	11095.77018	12420.82848	1	2	2	NA	NA	NA	NA	NA	NA	NA	NA	NA	NA	NA	NA	NA	NA	NA	NA	NA	NA	NA	NA	NA	NA	NA	NA	15.1	NA	NA	2	NA	NA	NA	NA	NA	NA	NA	NA	NA	NA	NA	NA	NA	NA
110829	19312.52105	0	2	4	3	NA	NA	NA	NA	NA	NA	NA	NA	NA	NA	NA	NA	NA	NA	NA	NA	NA	NA	NA	NA	NA	NA	NA	NA	NA	NA	NA	2	NA	NA	NA	NA	NA	NA	NA	NA	NA	NA	NA	NA	NA	NA
110830	6820.895682	7508.911514	1	33	4	14	4.1	64	20	30	15	101	173	1.33	2.7	4.72	15	61	117	285	4	4.5	143	0.3	9.6	149	6.8	93	3.9	26.9	NA	NA	2	NA	NA	NA	2	2	2	2	9.6	255	3.76	NA	NA	NA	0.333
110831	6159.050007	6445.261686	1	67	4	NA	NA	NA	NA	NA	NA	NA	NA	NA	NA	NA	NA	NA	NA	NA	NA	NA	NA	NA	NA	NA	NA	NA	NA	26.1	NA	2	2	NA	2	2	1	2	2	2	5.5	104	5.29	NA	NA	NA	1.396
110832	4500.114	4914.248728	2	0	4	NA	NA	NA	NA	NA	NA	NA	NA	NA	NA	NA	NA	NA	NA	NA	NA	NA	NA	NA	NA	NA	NA	NA	NA	NA	NA	NA	NA	NA	NA	NA	NA	NA	NA	NA	NA	NA	NA	NA	NA	NA	NA
110833	65295.55977	71280.78863	2	68	3	49	3.9	63	35	25	18	103	75	0.65	2.9	4.44	34	77	222	284	3.4	4.8	142	0.1	8.9	215	6.8	77	3.9	25.7	1	2	2	4.77	1	2	2	2	2	2	7.3	129	5.66	NA	NA	NA	0.517
110834	11974.97396	13417.48124	1	72	3	10	3.9	63	22	22	34	100	51	1.9	3.5	11.05	40	78	188	293	3.1	4.5	140	0.7	10.4	184	7.4	117	6.6	49.7	1	1	1	11.5	2	2	2	1	2	1	68.8	131	52.52	NA	NA	NA	0.376
110835	6252.735976	6578.882216	2	50	4	13	3.4	79	15	23	5	106	77	0.55	3.3	5.44	20	41	164	278	3.1	3.6	141	0.2	8.7	169	6.7	109	3.3	34.2	1	2	2	5.94	2	2	2	2	2	2	2.6	40	6.5	NA	NA	NA	1.324
110836	12521.01916	12717.27989	1	45	4	20	3.5	125	14	23	14	96	260	0.95	3.5	22.87	59	59	173	290	3.1	3.9	136	0.2	9.5	282	7	300	5.5	41.9	NA	2	3	NA	NA	NA	2	1	2	2	2.9	45	6.44	0.08	0.56	1.02	1.803
110837	20522.13546	24075.10343	1	20	5	NA	NA	NA	NA	NA	NA	NA	NA	NA	NA	NA	NA	NA	NA	NA	NA	NA	NA	NA	NA	NA	NA	NA	NA	31.3	NA	NA	2	NA	NA	NA	2	1	2	2	NA	NA	NA	NA	NA	NA	NA
110838	6541.346784	0	2	6	4	NA	NA	NA	NA	NA	NA	NA	NA	NA	NA	NA	NA	NA	NA	NA	NA	NA	NA	NA	NA	NA	NA	NA	NA	NA	NA	NA	2	NA	NA	NA	NA	NA	NA	NA	NA	NA	NA	NA	NA	NA	NA
110839	2206.343887	2435.934652	1	4	4	NA	NA	NA	NA	NA	NA	NA	NA	NA	NA	NA	NA	NA	NA	NA	NA	NA	NA	NA	NA	NA	NA	NA	NA	16.9	NA	NA	2	NA	NA	NA	NA	NA	NA	NA	5.9	29	20.34	0.08	0.56	4.08	NA
110840	19031.51172	21321.91586	2	0	3	NA	NA	NA	NA	NA	NA	NA	NA	NA	NA	NA	NA	NA	NA	NA	NA	NA	NA	NA	NA	NA	NA	NA	NA	NA	NA	NA	NA	NA	NA	NA	NA	NA	NA	NA	NA	NA	NA	NA	NA	NA	NA
110841	58588.78755	62311.49009	1	54	3	20	4.1	91	16	23	12	104	60	0.96	2.8	4.88	21	78	171	280	3.1	4.5	141	0.4	8.8	180	6.9	166	6.4	44.4	0	1	2	NA	2	2	2	1	2	2	7.5	144	5.21	0.47	0.56	19.57	0.771
110842	8468.063886	8616.408465	1	51	5	NA	NA	NA	NA	NA	NA	NA	NA	NA	NA	NA	NA	NA	NA	NA	NA	NA	NA	NA	NA	NA	NA	NA	NA	21.4	1	2	2	NA	2	2	2	2	2	2	2.6	24	10.83	0.08	0.56	4.3	1.819
110843	20140.41625	24296.55716	1	9	3	NA	NA	NA	NA	NA	NA	NA	NA	NA	NA	NA	NA	NA	NA	NA	NA	NA	NA	NA	NA	NA	NA	NA	NA	14.5	NA	NA	2	NA	NA	NA	NA	NA	NA	NA	5.9	98	6.02	0.69	0.56	11.5	0.337
110844	31632.01971	35832.03284	1	4	3	NA	NA	NA	NA	NA	NA	NA	NA	NA	NA	NA	NA	NA	NA	NA	NA	NA	NA	NA	NA	NA	NA	NA	NA	17.4	NA	NA	2	NA	NA	NA	NA	NA	NA	NA	20.2	80	25.25	1.35	0.56	8.94	NA
110845	19014.40143	0	1	10	5	NA	NA	NA	NA	NA	NA	NA	NA	NA	NA	NA	NA	NA	NA	NA	NA	NA	NA	NA	NA	NA	NA	NA	NA	NA	NA	NA	2	NA	NA	NA	NA	NA	NA	NA	NA	NA	NA	NA	NA	NA	NA
110846	4269.589145	4800.407058	2	2	1	NA	NA	NA	NA	NA	NA	NA	NA	NA	NA	NA	NA	NA	NA	NA	NA	NA	NA	NA	NA	NA	NA	NA	NA	17.4	NA	NA	2	NA	NA	NA	NA	NA	NA	NA	NA	NA	NA	NA	NA	NA	NA
110847	7171.732055	7710.817972	2	16	1	4	4.7	66	13	26	15	105	59	0.68	2.6	4.66	8	49	136	291	3.9	4.2	146	0.4	9.6	111	7.3	39	4.2	24.6	NA	NA	2	NA	NA	NA	NA	9	NA	NA	7.2	169	4.26	0.8	1.05	5.6	NA
110848	7149.981127	7221.685878	1	19	1	69	4.6	70	44	25	15	99	127	0.69	3.2	5.11	27	157	161	282	4.9	3.8	141	0.6	9.6	217	7.8	140	6.1	28.1	NA	NA	2	5.44	NA	NA	NA	2	NA	NA	29.9	107	27.94	0.08	0.56	8.37	0.196
110849	16724.5654	18016.78166	1	79	5	9	4	69	12	24	25	96	41	1.37	3.5	17.21	19	60	131	296	3.6	4.7	140	0.5	9.2	192	7.5	134	5.1	29.5	0	2	1	NA	2	2	1	2	2	2	169.5	193	87.82	0.08	0.56	2.77	1.109
110850	26259.9553	30300.68772	1	8	3	NA	NA	NA	NA	NA	NA	NA	NA	NA	NA	NA	NA	NA	NA	NA	NA	NA	NA	NA	NA	NA	NA	NA	NA	20.1	NA	NA	2	NA	NA	NA	NA	NA	NA	NA	13.3	84	15.83	0.08	0.56	13.47	NA
110851	61019.31556	65534.08754	2	26	3	8	4.1	43	15	25	10	104	106	0.57	2.3	4.94	10	45	132	283	3.4	4.4	143	0.1	9.2	147	6.4	43	2.4	18	NA	NA	2	NA	NA	NA	2	2	2	2	5.3	82	6.46	NA	NA	NA	1.279
110852	3192.469371	3307.47026	1	61	4	14	4	68	17	22	13	101	230	1.29	3.5	7.44	38	67	145	280	3.1	3.8	139	0.5	9.5	204	7.5	102	8.7	33.1	0	1	2	7.66	2	2	2	1	2	2	5.8	121	4.79	0.08	0.56	21.33	0.953
110853	11585.1724	12720.22275	1	42	2	38	4.6	88	21	25	12	103	270	0.75	3.5	5.66	41	65	162	283	3.7	3.8	142	0.5	9.7	195	8.1	228	6.6	26.7	NA	1	2	NA	NA	NA	2	2	2	2	26.3	94	27.98	0.08	0.56	7.05	NA
110854	21343.6257	23933.43451	1	38	5	19	3.8	55	26	24	22	101	569	0.88	2.9	2.16	12	65	158	279	3.9	4.2	140	0.2	8.8	156	6.7	37	3.5	23.2	NA	NA	1	NA	NA	NA	2	2	2	2	18.3	109	16.79	NA	NA	NA	1.878
110855	8759.176463	9798.769523	2	2	3	NA	NA	NA	NA	NA	NA	NA	NA	NA	NA	NA	NA	NA	NA	NA	NA	NA	NA	NA	NA	NA	NA	NA	NA	18.7	NA	NA	2	NA	NA	NA	NA	NA	NA	NA	NA	NA	NA	NA	NA	NA	NA
110856	15207.50843	16242.05227	1	12	3	14	4.3	310	23	25	12	105	88	0.52	2.5	4.88	13	86	210	282	4.6	4.4	142	0.2	9.3	122	6.8	51	3.4	17.8	NA	NA	2	NA	NA	NA	NA	NA	NA	NA	2.5	41	6.1	NA	NA	NA	0.595
110857	7198.674611	8097.173204	1	40	5	29	4.3	74	22	26	19	99	86	0.98	3.6	4.66	32	85	150	283	4.7	3.8	141	0.3	9.4	254	7.9	120	8.4	27.4	NA	2	2	NA	NA	NA	2	2	2	2	7.4	200	3.7	2.26	0.56	36.55	0.505
110858	11561.98164	13034.39142	2	10	3	NA	NA	NA	NA	NA	NA	NA	NA	NA	NA	NA	NA	NA	NA	NA	NA	NA	NA	NA	NA	NA	NA	NA	NA	19	NA	NA	2	NA	NA	NA	NA	NA	NA	NA	78.3	194	40.36	0.78	0.56	3.73	0.253
110859	5142.343759	5490.367106	1	65	4	12	4.1	70	21	27	13	104	382	1.08	2.8	5.05	13	86	167	281	2.7	4.3	141	0.5	9.1	180	6.9	86	5.1	39.4	0	2	2	5.33	2	2	2	1	1	2	12.9	248	5.2	NA	NA	NA	0.528
110860	54351.01802	58046.70394	2	20	2	9	4.5	46	13	25	8	104	74	0.71	2.8	2.89	10	127	127	281	3.5	3.6	143	0.5	9.7	128	7.3	89	3.9	19.5	NA	NA	2	NA	NA	NA	2	2	2	2	9.9	135	7.33	0.4	0.56	3.29	0.143
110861	8347.997502	8903.976298	2	67	1	22	4.4	99	18	26	15	100	86	0.63	2.9	4.72	18	104	172	283	3.3	3.9	142	0.3	9.5	259	7.3	174	4.9	25	0	2	2	NA	2	2	1	2	2	2	6.8	18	37.78	NA	NA	NA	3.209
110862	16598.57239	19207.74509	1	26	5	10	4.1	59	14	28	14	99	163	1.22	2.5	3.77	11	87	118	276	3.7	3.9	139	0.2	9	141	6.6	266	7.3	22.5	NA	NA	2	NA	NA	NA	2	2	2	2	2.2	106	2.08	NA	NA	NA	1.213
110863	10945.04016	12931.71469	1	13	5	14	3.9	284	23	25	10	103	131	0.47	3	5.11	15	64	186	278	4.9	4.3	140	0.8	9.4	138	6.9	89	5.9	23.4	NA	NA	2	5.44	NA	NA	NA	NA	NA	NA	2.3	37	6.22	NA	NA	NA	NA
110864	21375.45432	22457.03295	1	13	3	37	4.6	193	33	29	11	101	90	0.7	2.3	4.72	21	87	260	284	4.9	4.6	143	0.6	9.7	245	6.9	318	5	21.5	NA	NA	2	NA	NA	NA	NA	NA	NA	NA	6.2	84	7.38	NA	NA	NA	0.55
110865	24194.63498	27684.15217	1	24	3	18	4.3	65	22	28	15	101	245	1.21	2.6	4.72	11	83	168	283	3.1	4.2	142	0.2	9.5	149	6.9	145	6.5	25.5	NA	NA	2	NA	NA	NA	2	2	2	2	7.1	130	5.46	0.08	0.56	6.16	2
110866	10818.5799	12168.36186	2	80	4	NA	NA	NA	NA	NA	NA	NA	NA	NA	NA	NA	NA	NA	NA	NA	NA	NA	NA	NA	NA	NA	NA	NA	NA	27.7	0	2	2	NA	2	2	1	1	2	2	3.4	70	4.86	0.08	0.56	2.84	0.211
110867	11111.41063	12887.90949	1	80	3	20	4	68	28	27	14	101	90	0.88	3	5.05	57	90	186	283	3.8	4.4	142	0.4	9.6	279	7	328	5.6	23.6	1	2	2	NA	2	2	2	2	2	2	13.9	124	11.21	NA	NA	NA	0.73
110868	6840.658782	6985.774243	1	40	4	34	4.2	63	23	23	13	102	241	1.18	3.5	5.66	161	61	140	278	4	4.1	139	0.3	9.5	234	7.7	63	5.8	37.5	NA	1	2	NA	NA	NA	2	1	2	2	10.6	161	6.58	NA	NA	NA	1.032
110869	11046.74696	12498.71441	2	11	4	NA	NA	NA	NA	NA	NA	NA	NA	NA	NA	NA	NA	NA	NA	NA	NA	NA	NA	NA	NA	NA	NA	NA	NA	35.1	NA	NA	2	NA	NA	NA	NA	NA	NA	NA	31.1	344	9.04	NA	NA	NA	1.204
110870	8734.933143	9404.667212	1	78	1	17	4.2	66	21	28	23	105	125	1.14	3.2	7.22	12	87	186	296	3.7	4.3	146	0.6	8.9	98	7.4	64	6.2	27.4	1	1	1	7.99	2	2	2	1	2	2	304.5	45	676.67	NA	NA	NA	2.256
110871	10028.59268	10547.49482	1	18	5	10	4.4	79	14	28	12	104	114	0.81	2.7	5.22	16	163	142	286	4	4.4	144	0.7	9.6	149	7.1	92	8	21.5	NA	NA	2	NA	NA	NA	NA	2	NA	NA	39.6	69	57.39	NA	NA	NA	NA
110872	8679.588336	9063.274052	2	51	5	32	4.4	69	26	25	17	101	75	0.59	3.6	5.66	42	83	164	283	3.5	3.9	141	0.7	9.4	191	8	143	6.9	23.7	0	2	2	6.38	2	1	2	2	2	2	2	35	5.71	NA	NA	NA	0.927
110873	16953.10262	17498.39015	1	10	2	NA	NA	NA	NA	NA	NA	NA	NA	NA	NA	NA	NA	NA	NA	NA	NA	NA	NA	NA	NA	NA	NA	NA	NA	19.7	NA	NA	2	NA	NA	NA	NA	NA	NA	NA	4.2	65	6.46	0.08	0.56	9.05	0.464
110874	29557.8508	0	1	27	4	NA	NA	NA	NA	NA	NA	NA	NA	NA	NA	NA	NA	NA	NA	NA	NA	NA	NA	NA	NA	NA	NA	NA	NA	NA	NA	NA	2	NA	NA	NA	2	2	2	2	NA	NA	NA	NA	NA	NA	NA
110875	103661.6936	105366.5274	1	63	3	18	3.9	81	16	27	19	105	119	0.91	3	6.27	28	105	139	286	2.7	4.4	142	0.5	8.9	176	6.9	97	5.6	25.2	0	2	2	6.61	2	2	2	1	2	2	3.6	118	3.05	0.08	0.56	2.66	1.268
110876	37988.34807	41975.11011	1	56	2	15	4	75	20	25	13	105	360	0.91	3.3	5	16	102	183	279	1.9	3.8	140	1.3	10	152	7.3	117	8	30.7	1	2	2	5.27	2	2	2	2	2	2	15.3	139	11.01	NA	NA	NA	0.898
110877	6450.232235	7974.013468	2	5	5	NA	NA	NA	NA	NA	NA	NA	NA	NA	NA	NA	NA	NA	NA	NA	NA	NA	NA	NA	NA	NA	NA	NA	NA	14.3	NA	NA	2	NA	NA	NA	NA	NA	NA	NA	5.4	20	27	0.08	0.56	6.54	NA
110878	12540.54156	15490.98153	1	10	3	NA	NA	NA	NA	NA	NA	NA	NA	NA	NA	NA	NA	NA	NA	NA	NA	NA	NA	NA	NA	NA	NA	NA	NA	16.2	NA	NA	2	NA	NA	NA	NA	NA	NA	NA	3.7	62	5.97	0.08	0.56	5.57	0.806
110879	8964.709021	9661.766543	1	50	4	NA	NA	NA	NA	NA	NA	NA	NA	NA	NA	NA	NA	NA	NA	NA	NA	NA	NA	NA	NA	NA	NA	NA	NA	25.6	0	1	2	NA	1	2	2	2	2	2	2.5	21	11.9	NA	NA	NA	1.555
110880	57224.66065	62487.29526	2	12	2	17	4.4	181	20	27	14	102	104	0.52	3.1	5.72	10	45	163	284	4.7	4.3	142	0.6	9.6	161	7.5	193	3.1	23.1	NA	NA	2	NA	NA	NA	NA	NA	NA	NA	8.4	95	8.84	0.18	0.56	4.96	0.748
110881	18358.99079	21596.4331	2	29	3	9	3.4	96	13	24	9	103	57	0.59	3.2	4.72	12	31	137	277	3.7	3.7	140	0.1	8.9	193	6.6	229	4.5	29.1	NA	NA	2	NA	NA	NA	2	2	2	2	34.6	254	13.62	NA	NA	NA	0.435
110882	3872.180385	3994.716891	1	70	4	2	3.2	57	10	23	3	90	102	0.92	4.4	4.88	15	39	108	255	3.9	4.6	129	0.2	8.9	122	7.6	59	7.1	25.1	NA	2	1	NA	2	2	2	2	2	2	3.3	88	3.75	0.08	0.56	9.89	0.83
110883	6714.852676	8240.873609	2	7	5	NA	NA	NA	NA	NA	NA	NA	NA	NA	NA	NA	NA	NA	NA	NA	NA	NA	NA	NA	NA	NA	NA	NA	NA	15.9	NA	NA	2	NA	NA	NA	NA	NA	NA	NA	3.5	17	20.59	NA	NA	NA	NA
110884	25124.72422	28644.46127	1	79	3	7	4.4	75	15	27	17	104	89	0.86	3.2	4.77	16	69	160	286	3.6	4.4	143	0.5	9.4	203	7.6	83	5	23.7	1	1	2	NA	2	2	2	1	2	2	12.5	121	10.33	NA	NA	NA	0.451
110885	7805.051171	8812.687272	1	9	3	NA	NA	NA	NA	NA	NA	NA	NA	NA	NA	NA	NA	NA	NA	NA	NA	NA	NA	NA	NA	NA	NA	NA	NA	18.4	NA	NA	2	NA	NA	NA	NA	NA	NA	NA	12.4	159	7.8	NA	NA	NA	NA
110886	16192.99745	18509.94592	1	64	3	16	3.9	89	16	26	19	103	114	1.26	3.1	5.16	62	42	157	283	3.8	4.1	141	0.6	9.2	201	7	324	5.6	32	0	2	2	NA	2	2	2	2	1	2	5.3	106	5	NA	NA	NA	0.448
110887	50437.21145	53449.65828	2	20	3	10	4.2	39	13	26	13	100	72	0.76	3	4.88	9	56	131	275	4.3	3.8	138	0.3	9.4	163	7.2	198	3.8	18.8	NA	NA	2	NA	NA	NA	2	2	2	2	8.2	126	6.51	NA	NA	NA	0.274
110888	5848.121509	6018.392291	2	68	4	27	3.7	109	18	24	19	106	152	1.16	3.6	13.77	46	50	221	296	3.3	3.6	143	0.4	8.8	109	7.3	70	6	35.2	1	2	1	14.3	2	2	2	1	2	2	708	149	475.17	0.08	0.56	28.01	0.56
110889	9504.47117	10730.46448	2	71	4	13	4.1	98	13	24	14	100	85	0.5	3.8	6.55	16	97	157	287	3.8	4	143	0.4	10.2	165	7.9	100	3.6	29.8	0	1	1	7.05	1	2	2	1	2	2	8.8	84	10.48	NA	NA	NA	0.466
110890	5505.509199	6298.165635	2	41	4	11	3.7	63	15	24	8	104	106	0.83	3.2	4.83	10	125	131	279	3.6	3.7	141	1.3	8.5	167	6.9	166	4	26.4	NA	2	2	5.22	NA	NA	2	2	2	2	12.1	256	4.73	0.47	0.56	1432.61	0.418
110891	57051.82965	62581.22164	2	71	3	NA	NA	NA	NA	NA	NA	NA	NA	NA	NA	NA	NA	NA	NA	NA	NA	NA	NA	NA	NA	NA	NA	NA	NA	30.8	0	2	2	NA	1	2	2	2	2	2	7.6	136	5.59	0.17	0.56	14.55	0.324
110892	49805.95522	57642.00146	1	3	3	NA	NA	NA	NA	NA	NA	NA	NA	NA	NA	NA	NA	NA	NA	NA	NA	NA	NA	NA	NA	NA	NA	NA	NA	16	NA	NA	2	NA	NA	NA	NA	NA	NA	NA	10.7	71	15.07	0.79	0.85	NA	NA
110893	6297.713774	0	1	7	5	NA	NA	NA	NA	NA	NA	NA	NA	NA	NA	NA	NA	NA	NA	NA	NA	NA	NA	NA	NA	NA	NA	NA	NA	NA	NA	NA	2	NA	NA	NA	NA	NA	NA	NA	NA	NA	NA	NA	NA	NA	NA
110894	8236.513574	8443.384829	2	50	4	9	3.7	54	11	23	13	104	88	0.72	3.1	4.66	24	86	208	279	2.4	3.5	140	0.6	8.6	181	6.8	90	3.2	39.2	0	2	2	NA	2	2	2	1	2	2	15.7	160	9.81	NA	NA	NA	0.516
110895	5274.63672	5872.06633	2	18	5	13	4.7	54	16	24	7	106	76	0.5	3.2	4.72	11	59	112	282	3.5	3.9	143	0.3	9.3	120	7.9	85	3.6	19.5	NA	NA	2	NA	NA	NA	NA	2	NA	NA	97.5	135	72.22	NA	NA	NA	NA
110896	1988.033319	2324.104979	1	6	4	NA	NA	NA	NA	NA	NA	NA	NA	NA	NA	NA	NA	NA	NA	NA	NA	NA	NA	NA	NA	NA	NA	NA	NA	20.8	NA	NA	2	NA	NA	NA	NA	NA	NA	NA	13.6	133	10.23	NA	NA	NA	0.616
110897	11307.74209	12610.26073	1	50	5	25	3.9	66	26	27	5	98	107	0.92	3.3	5.55	45	81	130	269	3.7	4.3	136	0.3	8.7	197	7.2	400	6.9	27.4	0	2	2	5.94	2	2	2	2	2	2	0.4	13	3.08	NA	NA	NA	4.464
110898	7492.693741	8537.716964	1	41	5	18	4.6	55	14	25	21	98	233	0.96	3	4.72	34	55	127	276	3.7	4	137	0.4	9.4	167	7.6	151	7.9	34.6	NA	1	2	NA	NA	NA	2	1	1	2	3.1	66	4.7	0.08	0.56	1.9	1.465
110899	64384.50468	68458.91645	2	29	3	16	3.8	80	17	24	14	103	107	0.7	3.1	5.44	25	130	146	278	3.2	4.1	139	0.4	9.1	170	6.9	81	4.3	34.5	NA	NA	2	5.55	NA	NA	2	1	2	2	1.6	35	4.57	NA	NA	NA	2.006
110900	10753.6791	11202.86217	2	62	2	28	3.9	134	29	27	21	97	95	0.72	3.4	4.77	230	64	152	278	3.6	3.7	138	0.3	9.5	186	7.3	189	5.7	37.9	NA	1	1	NA	2	1	2	1	2	2	24.4	125	19.52	NA	NA	NA	0.099
110901	5917.005246	6652.638645	2	1	1	NA	NA	NA	NA	NA	NA	NA	NA	NA	NA	NA	NA	NA	NA	NA	NA	NA	NA	NA	NA	NA	NA	NA	NA	NA	NA	NA	2	NA	NA	NA	NA	NA	NA	NA	NA	NA	NA	NA	NA	NA	NA
110902	14655.86422	15437.66354	1	16	4	NA	NA	NA	NA	NA	NA	NA	NA	NA	NA	NA	NA	NA	NA	NA	NA	NA	NA	NA	NA	NA	NA	NA	NA	27.6	NA	NA	2	NA	NA	NA	NA	2	NA	NA	2.5	78	3.21	NA	NA	NA	1.676
110903	6186.494158	6720.274139	1	9	5	NA	NA	NA	NA	NA	NA	NA	NA	NA	NA	NA	NA	NA	NA	NA	NA	NA	NA	NA	NA	NA	NA	NA	NA	15.9	NA	NA	2	NA	NA	NA	NA	NA	NA	NA	6.8	135	5.04	NA	NA	NA	NA
110904	18934.11843	20847.50811	1	26	1	34	4.4	87	21	26	14	102	167	0.93	2.3	5.22	49	157	184	276	3.5	4.1	138	0.6	9.3	163	6.7	136	4.8	31.9	NA	NA	2	NA	NA	NA	2	2	2	2	2.1	99	2.12	0.44	0.56	2.42	0.116
110905	25008.13099	30716.90473	2	42	3	11	4.2	77	16	22	12	103	50	0.79	2.9	4.61	11	81	NA	276	3.3	3.5	139	0.1	9	209	7.1	136	4.8	22.9	NA	1	2	NA	NA	NA	2	2	1	2	1.6	38	4.21	0.08	0.56	0.71	0.305
110906	7181.072915	7701.83727	2	66	5	14	4	77	18	21	26	106	103	1	3.1	8.22	17	55	149	289	3.7	4.3	141	0.2	10.2	157	7.1	299	6.9	25.3	0	1	1	NA	2	2	2	2	2	2	3.2	71	4.51	NA	NA	NA	1.047
110907	10325.8482	0	1	9	3	NA	NA	NA	NA	NA	NA	NA	NA	NA	NA	NA	NA	NA	NA	NA	NA	NA	NA	NA	NA	NA	NA	NA	NA	NA	NA	NA	2	NA	NA	NA	NA	NA	NA	NA	NA	NA	NA	NA	NA	NA	NA
110908	10899.62784	12008.40831	1	31	5	NA	NA	NA	NA	NA	NA	NA	NA	NA	NA	NA	NA	NA	NA	NA	NA	NA	NA	NA	NA	NA	NA	NA	NA	27.1	NA	NA	2	NA	NA	NA	2	2	2	2	5.5	244	2.25	0.08	0.56	8.93	0.63
110909	11517.43777	11883.56321	2	61	4	16	3.8	118	18	27	13	100	180	0.8	3.6	5.55	25	62	210	281	4.1	3.3	141	0.2	9.4	240	7.4	106	5.7	30.9	0	1	2	NA	2	2	2	1	2	2	3.3	67	4.93	0.08	0.56	20.74	1.141
110910	46704.01183	51465.89297	1	46	3	16	4.3	59	24	30	15	102	235	1.11	3.2	4.39	19	77	127	285	3.6	4.2	143	0.9	9.4	168	7.5	82	4.7	25.9	NA	2	2	5.16	NA	NA	2	2	2	2	13.7	354	3.87	NA	NA	NA	0.86
110911	6740.973333	0	2	62	4	NA	NA	NA	NA	NA	NA	NA	NA	NA	NA	NA	NA	NA	NA	NA	NA	NA	NA	NA	NA	NA	NA	NA	NA	NA	NA	1	2	NA	2	1	2	1	2	2	NA	NA	NA	NA	NA	NA	NA
110912	3099.913924	3424.115716	2	3	4	NA	NA	NA	NA	NA	NA	NA	NA	NA	NA	NA	NA	NA	NA	NA	NA	NA	NA	NA	NA	NA	NA	NA	NA	16	NA	NA	2	NA	NA	NA	NA	NA	NA	NA	9.2	91	10.11	0.08	0.56	2.93	NA
110913	4328.766684	4687.346662	2	2	4	NA	NA	NA	NA	NA	NA	NA	NA	NA	NA	NA	NA	NA	NA	NA	NA	NA	NA	NA	NA	NA	NA	NA	NA	14.7	NA	NA	2	NA	NA	NA	NA	NA	NA	NA	NA	NA	NA	NA	NA	NA	NA
110914	8452.566443	9217.545912	1	8	4	NA	NA	NA	NA	NA	NA	NA	NA	NA	NA	NA	NA	NA	NA	NA	NA	NA	NA	NA	NA	NA	NA	NA	NA	16.3	NA	NA	2	NA	NA	NA	NA	NA	NA	NA	1.4	35	4	0.08	0.56	2.22	NA
110915	14383.51816	16268.58759	2	80	4	6	3.6	77	14	26	24	99	100	1.4	3.7	5.27	17	39	180	276	4.2	4.7	136	0.3	9.5	208	7.3	55	5.8	24.7	0	2	2	5.55	2	2	2	2	2	2	16.5	50	33	NA	NA	NA	0.967
110916	20530.39065	22055.65809	2	33	1	11	4.1	89	10	25	9	103	122	0.53	3.3	5.61	9	44	139	286	3.4	3.8	144	0.6	9.3	163	7.4	68	3.3	23	NA	NA	2	6.16	NA	NA	2	2	2	2	14.5	121	11.98	NA	NA	NA	0.838
110917	12276.83656	13094.41344	1	47	4	41	4	57	37	26	12	103	239	1.01	3.2	5.11	54	70	168	281	3.9	4.2	141	0.3	9.1	258	7.2	64	6.4	23.9	NA	2	2	5.5	NA	NA	2	2	2	2	6.3	203	3.1	NA	NA	NA	0.304
110918	3814.866566	3948.510889	1	65	4	11	3.8	87	15	25	17	104	164	1.35	3.6	4.88	21	123	140	286	4	4.5	143	0.5	9.6	212	7.4	110	7.8	27.6	1	2	3	5.11	2	2	2	2	2	2	63.5	158	40.19	NA	NA	NA	0.571
110919	10260.7595	11603.2072	2	4	1	NA	NA	NA	NA	NA	NA	NA	NA	NA	NA	NA	NA	NA	NA	NA	NA	NA	NA	NA	NA	NA	NA	NA	NA	18	NA	NA	2	NA	NA	NA	NA	NA	NA	NA	9.2	69	13.33	1.17	0.56	15.47	NA
110920	2957.193502	3204.885238	2	67	1	53	4.3	66	46	27	9	102	67	0.47	3.4	5.88	25	67	188	284	3.7	4.2	143	0.2	9.6	238	7.7	269	5.6	35.6	1	2	2	NA	2	2	2	2	1	2	4.9	33	14.85	NA	NA	NA	1.053
110921	33748.3075	34017.9605	2	33	3	12	4.4	100	15	23	13	101	87	0.73	3.3	4.72	10	41	146	273	3.4	3.5	137	0.2	9.3	174	7.7	143	3.6	25.2	NA	NA	2	NA	NA	NA	2	2	2	2	6.9	96	7.19	NA	NA	NA	0.528
110922	8238.960664	9004.726772	2	14	1	15	4.3	114	19	25	16	104	115	0.72	2.8	5.22	9	119	173	282	3.5	4.2	141	0.4	9.7	148	7.1	86	4.4	23.1	NA	NA	2	5.61	NA	NA	NA	NA	NA	NA	5.5	62	8.87	0.08	0.56	1.82	0.75
110923	40700.6739	43720.8288	2	13	2	11	4.3	125	14	25	9	105	58	0.63	2.7	5.11	9	143	130	285	4.4	4.3	144	0.3	9.6	163	7	155	3.3	19	NA	NA	2	5.61	NA	NA	NA	NA	NA	NA	4.7	73	6.44	NA	NA	NA	0.519
110924	2759.353234	2803.916302	1	64	4	NA	NA	NA	NA	NA	NA	NA	NA	NA	NA	NA	NA	NA	NA	NA	NA	NA	NA	NA	NA	NA	NA	NA	NA	23.7	1	2	2	NA	2	1	2	2	1	2	32.7	155	21.1	NA	NA	NA	0.283
110925	15744.85673	16847.31259	1	80	4	11	3.7	35	13	25	23	103	85	1.34	3	5.77	44	59	184	282	3.9	4.2	139	0.6	9	96	6.7	48	6.4	37.9	0	2	1	NA	1	2	1	2	2	2	48.9	123	39.76	NA	NA	NA	0.677
110926	1664.919253	1838.169709	1	1	4	NA	NA	NA	NA	NA	NA	NA	NA	NA	NA	NA	NA	NA	NA	NA	NA	NA	NA	NA	NA	NA	NA	NA	NA	NA	NA	NA	2	NA	NA	NA	NA	NA	NA	NA	NA	NA	NA	NA	NA	NA	NA
110927	10760.91414	12024.04496	2	6	3	NA	NA	NA	NA	NA	NA	NA	NA	NA	NA	NA	NA	NA	NA	NA	NA	NA	NA	NA	NA	NA	NA	NA	NA	16.4	NA	NA	2	NA	NA	NA	NA	NA	NA	NA	18	139	12.95	0.6	0.56	9.68	0.207
110928	7408.355952	9158.481119	2	0	5	NA	NA	NA	NA	NA	NA	NA	NA	NA	NA	NA	NA	NA	NA	NA	NA	NA	NA	NA	NA	NA	NA	NA	NA	NA	NA	NA	NA	NA	NA	NA	NA	NA	NA	NA	NA	NA	NA	NA	NA	NA	NA
110929	23445.46723	26871.46333	1	80	3	15	3.2	151	23	22	15	101	134	1.05	4.3	5.05	17	66	151	282	2.9	4.5	141	0.7	8.8	166	7.5	63	5.3	31.7	1	1	2	5.38	2	2	2	2	2	2	26.3	163	16.13	0.66	0.56	11.75	0.563
110930	13952.81453	16060.63123	1	14	3	17	4.6	154	16	27	12	102	99	0.88	2.6	4.61	22	50	114	286	2.9	3.8	144	0.2	9.5	202	7.2	96	6	23	NA	NA	2	5.11	NA	NA	NA	NA	NA	NA	9.7	228	4.25	NA	NA	NA	0.531
110931	9060.735922	10380.20182	1	4	3	NA	NA	NA	NA	NA	NA	NA	NA	NA	NA	NA	NA	NA	NA	NA	NA	NA	NA	NA	NA	NA	NA	NA	NA	15.3	NA	NA	2	NA	NA	NA	NA	NA	NA	NA	9.9	79	12.53	1.55	0.56	6.82	NA
110932	28321.92497	0	1	38	2	NA	NA	NA	NA	NA	NA	NA	NA	NA	NA	NA	NA	NA	NA	NA	NA	NA	NA	NA	NA	NA	NA	NA	NA	NA	NA	NA	2	NA	NA	NA	2	1	2	2	NA	NA	NA	NA	NA	NA	NA
110933	14217.85238	15909.13476	1	1	3	NA	NA	NA	NA	NA	NA	NA	NA	NA	NA	NA	NA	NA	NA	NA	NA	NA	NA	NA	NA	NA	NA	NA	NA	NA	NA	NA	2	NA	NA	NA	NA	NA	NA	NA	NA	NA	NA	NA	NA	NA	NA
110934	14196.1904	15511.08078	1	27	5	30	4.5	50	18	23	17	99	96	0.9	3.2	5.16	35	70	NA	275	4.2	4.1	137	0.4	9.5	214	7.7	587	10.4	30.9	NA	NA	2	NA	NA	NA	2	1	2	2	3.4	73	4.66	0.35	0.56	11.14	1.339
110935	12222.24087	13349.68811	1	61	2	36	3.9	86	22	25	20	106	385	0.8	3.6	5.88	31	120	186	294	2.7	4.6	146	0.3	8.9	173	7.5	131	4.7	37.5	0	2	2	6.16	2	2	2	1	1	2	47.5	76	62.5	NA	NA	NA	1.565
110936	20644.89649	25217.39908	1	80	3	13	3.8	82	17	27	9	99	52	0.81	3.1	5.77	29	131	130	282	3.9	4.6	142	0.8	9.1	170	6.9	78	7	27.2	0	2	2	6.11	2	2	2	2	2	2	16.3	138	11.81	NA	NA	NA	0.108
110937	5576.818594	7001.054166	2	7	5	NA	NA	NA	NA	NA	NA	NA	NA	NA	NA	NA	NA	NA	NA	NA	NA	NA	NA	NA	NA	NA	NA	NA	NA	13.6	NA	NA	2	NA	NA	NA	NA	NA	NA	NA	NA	NA	NA	NA	NA	NA	NA
110938	10691.64822	12660.27602	1	3	1	NA	NA	NA	NA	NA	NA	NA	NA	NA	NA	NA	NA	NA	NA	NA	NA	NA	NA	NA	NA	NA	NA	NA	NA	17.6	NA	NA	2	NA	NA	NA	NA	NA	NA	NA	NA	NA	NA	NA	NA	NA	NA
110939	17248.62821	17989.88661	2	31	2	NA	NA	NA	NA	NA	NA	NA	NA	NA	NA	NA	NA	NA	NA	NA	NA	NA	NA	NA	NA	NA	NA	NA	NA	18.9	NA	NA	2	NA	NA	NA	2	2	2	2	16	140	11.43	NA	NA	NA	0.309
110940	14452.09096	15235.90156	2	55	4	9	3.5	90	14	24	7	102	136	0.78	3.9	4.88	38	66	165	281	3.6	4.3	142	0.2	9	243	7.4	75	5.4	38.1	0	2	2	NA	1	2	2	1	2	2	9.6	186	5.16	NA	NA	NA	0.412
110941	99598.42139	107537.1918	2	59	3	22	4	53	22	24	15	97	119	0.81	3	4.94	30	110	154	274	3.5	4.5	137	0.4	9.1	203	7	200	4.9	29.6	0	1	2	5.05	2	2	2	1	2	2	1.2	33	3.64	NA	NA	NA	3.229
110942	5945.655074	6336.992139	2	68	4	10	3.9	59	19	31	16	100	95	0.92	3.5	5.22	17	99	189	282	3.8	3.7	141	0.8	9.3	159	7.4	114	6	25.3	0	2	2	5.88	1	2	2	1	2	2	18.5	60	30.83	NA	NA	NA	0.649
110943	26299.04738	29284.93731	1	14	5	27	4.3	340	25	25	8	100	121	0.54	3.5	5	18	31	267	274	3.9	4.1	138	0.2	9.8	160	7.8	106	6.2	29.1	NA	NA	2	5.44	NA	NA	NA	NA	NA	NA	3.5	82	4.27	0.08	0.56	9.46	NA
110944	9715.566888	10885.90563	1	73	3	30	3.7	46	27	27	21	103	104	1.08	3.4	5.55	25	93	200	288	2.6	4.5	143	0.8	8.9	172	7.1	120	6.7	34	1	2	2	6.05	2	2	2	1	2	2	6.2	103	6.02	0.08	0.56	5.43	1
110945	4241.232271	4833.762956	2	12	4	NA	NA	NA	NA	NA	NA	NA	NA	NA	NA	NA	NA	NA	NA	NA	NA	NA	NA	NA	NA	NA	NA	NA	NA	19.3	NA	NA	2	NA	NA	NA	NA	NA	NA	NA	17.5	157	11.15	NA	NA	NA	0.526
110946	12447.80018	0	2	33	1	NA	NA	NA	NA	NA	NA	NA	NA	NA	NA	NA	NA	NA	NA	NA	NA	NA	NA	NA	NA	NA	NA	NA	NA	NA	NA	NA	2	NA	NA	NA	2	1	2	2	NA	NA	NA	NA	NA	NA	NA
110947	15742.96915	16522.25447	2	30	5	15	3.8	55	19	23	11	106	92	0.69	3	5.11	14	38	172	280	3.2	3.8	141	0.2	8.7	132	6.8	39	2.4	21.1	NA	NA	2	5.44	NA	NA	2	2	2	2	18.1	75	24.13	0.08	0.56	3.04	0.704
110948	14973.10248	0	1	49	5	NA	NA	NA	NA	NA	NA	NA	NA	NA	NA	NA	NA	NA	NA	NA	NA	NA	NA	NA	NA	NA	NA	NA	NA	NA	NA	1	2	NA	NA	NA	2	2	2	2	NA	NA	NA	NA	NA	NA	NA
110949	16861.94471	17726.89745	2	26	5	8	4.3	63	14	27	11	101	62	0.75	3	4.55	11	108	123	278	4.5	4.6	140	0.4	9.3	149	7.3	88	4.5	25	NA	NA	2	NA	NA	NA	2	1	2	2	1.9	43	4.42	NA	NA	NA	1.172
110950	14530.82522	15251.89927	1	57	3	31	4.1	92	28	25	16	95	249	0.79	3.2	5.5	81	154	164	271	3.3	4.4	135	0.5	9.6	160	7.3	129	4.6	32.8	0	1	2	5.61	2	2	2	1	2	2	3.3	52	6.35	0.08	0.56	1.49	1.929
110951	7309.330138	7338.600495	2	5	3	NA	NA	NA	NA	NA	NA	NA	NA	NA	NA	NA	NA	NA	NA	NA	NA	NA	NA	NA	NA	NA	NA	NA	NA	14.7	NA	NA	2	NA	NA	NA	NA	NA	NA	NA	8.8	82	10.73	0.57	0.56	4.89	NA
110952	3916.396402	4961.12244	1	80	3	24	4	79	29	24	20	103	142	1.61	2.9	6.22	22	119	145	286	3.3	4.7	142	0.6	9.3	223	6.9	228	3.6	29.3	1	2	2	NA	2	2	2	2	2	2	14.2	220	6.45	0.8	1.11	7.93	0.385
110953	12633.80267	13510.70059	2	64	5	9	3.9	112	17	26	17	98	97	0.62	3.4	5.16	26	54	158	282	4.3	4.2	141	0.1	9.3	196	7.3	205	3.9	25.8	0	2	1	NA	2	2	2	2	2	2	2.3	10	23	NA	NA	NA	25
110954	29155.87196	31051.47654	2	24	4	13	4.1	67	19	24	9	100	142	0.75	3.8	4.5	26	122	135	270	3.2	3.9	136	0.4	9.2	150	7.9	53	3.3	19.7	NA	NA	2	4.94	NA	NA	2	2	2	2	2.8	112	2.5	NA	NA	NA	0.772
110955	10845.53217	13105.96283	1	8	3	NA	NA	NA	NA	NA	NA	NA	NA	NA	NA	NA	NA	NA	NA	NA	NA	NA	NA	NA	NA	NA	NA	NA	NA	15.9	NA	NA	2	NA	NA	NA	NA	NA	NA	NA	20	108	18.52	NA	NA	NA	0.578
110956	16234.83434	19508.16055	2	76	3	26	4	72	31	26	20	100	67	1.26	3.5	7.11	12	37	127	282	4	4.2	139	0.3	9.4	174	7.5	210	4.8	40.2	NA	1	1	NA	2	2	2	1	2	2	10.5	223	4.71	NA	NA	NA	0.2
110957	12637.6583	13963.16675	1	31	5	25	4.5	97	22	27	10	98	223	1.22	3.4	4.88	27	52	154	274	4.7	4.1	138	1.2	9.8	245	7.9	373	7.1	26.3	NA	NA	2	NA	NA	NA	2	2	2	2	3.4	108	3.15	NA	NA	NA	0.574
110958	5512.123816	5963.73904	1	51	4	8	3.7	77	13	21	11	102	64	0.7	3.7	5.11	13	133	125	273	4.4	4.3	137	0.5	8.7	164	7.4	71	4.6	18.1	NA	2	2	5.38	1	2	2	2	2	2	27.6	293	9.42	NA	NA	NA	0.064
110959	7514.704996	7755.238721	1	63	4	21	4.2	78	19	29	11	100	305	0.92	3.5	5.33	17	74	184	279	3.9	4.5	140	0.4	9.8	183	7.7	271	5.7	40.8	0	2	2	NA	2	2	2	1	2	2	60.6	84	72.14	0.08	0.56	14.05	2.603
110960	7671.255757	0	1	80	3	NA	NA	NA	NA	NA	NA	NA	NA	NA	NA	NA	NA	NA	NA	NA	NA	NA	NA	NA	NA	NA	NA	NA	NA	NA	NA	2	2	NA	2	2	1	2	1	2	NA	NA	NA	NA	NA	NA	NA
110961	18286.66667	19804.85747	1	60	5	17	3.5	93	19	25	16	105	199	0.8	3.2	6.55	22	98	137	284	3.6	4.1	141	0.4	8.6	171	6.7	222	7.6	33	0	2	1	6.66	2	2	2	1	1	2	343	159	215.72	NA	NA	NA	0.397
110962	7965.058835	8813.597705	1	11	5	NA	NA	NA	NA	NA	NA	NA	NA	NA	NA	NA	NA	NA	NA	NA	NA	NA	NA	NA	NA	NA	NA	NA	NA	19.8	NA	NA	2	NA	NA	NA	NA	NA	NA	NA	13.4	124	10.81	NA	NA	NA	NA
110963	33577.93275	35182.52599	2	15	1	18	4.2	136	16	21	9	103	69	0.61	4	5.38	11	58	110	282	4	3.9	142	0.3	9.4	140	8.2	97	4.6	30.1	NA	NA	2	5.83	NA	NA	NA	NA	NA	NA	18.9	308	6.14	NA	NA	NA	0.183
110964	7022.797819	0	1	40	5	NA	NA	NA	NA	NA	NA	NA	NA	NA	NA	NA	NA	NA	NA	NA	NA	NA	NA	NA	NA	NA	NA	NA	NA	NA	NA	2	2	NA	NA	NA	2	2	2	2	NA	NA	NA	NA	NA	NA	NA
110965	32305.26441	0	1	25	1	NA	NA	NA	NA	NA	NA	NA	NA	NA	NA	NA	NA	NA	NA	NA	NA	NA	NA	NA	NA	NA	NA	NA	NA	NA	NA	NA	2	NA	NA	NA	2	1	2	2	NA	NA	NA	NA	NA	NA	NA
110966	37429.48928	40426.06702	2	29	3	9	4	61	12	24	15	105	124	0.81	2.7	4	10	28	65	281	3.9	4.2	141	0.2	8.9	162	6.7	67	3.6	25.2	NA	NA	2	NA	NA	NA	2	2	2	2	8.1	141	5.74	0.98	0.56	4.49	1.039
110967	7932.408947	8770.176019	1	8	3	NA	NA	NA	NA	NA	NA	NA	NA	NA	NA	NA	NA	NA	NA	NA	NA	NA	NA	NA	NA	NA	NA	NA	NA	15.3	NA	NA	2	NA	NA	NA	NA	NA	NA	NA	11.2	153	7.32	0.78	0.56	6.29	0.283
110968	17075.34743	17981.748	1	8	1	NA	NA	NA	NA	NA	NA	NA	NA	NA	NA	NA	NA	NA	NA	NA	NA	NA	NA	NA	NA	NA	NA	NA	NA	24.9	NA	NA	2	NA	NA	NA	NA	NA	NA	NA	8.1	109	7.43	NA	NA	NA	NA
110969	5421.431374	5808.734587	2	19	2	NA	NA	NA	NA	NA	NA	NA	NA	NA	NA	NA	NA	NA	NA	NA	NA	NA	NA	NA	NA	NA	NA	NA	NA	25.5	NA	NA	2	NA	NA	NA	NA	1	NA	NA	4.9	65	7.54	NA	NA	NA	1.445
110970	63982.37369	0	2	55	3	NA	NA	NA	NA	NA	NA	NA	NA	NA	NA	NA	NA	NA	NA	NA	NA	NA	NA	NA	NA	NA	NA	NA	NA	NA	NA	2	2	NA	1	2	2	2	1	2	NA	NA	NA	NA	NA	NA	NA
110971	8682.759944	9135.532503	1	68	2	17	4.1	109	17	28	18	99	117	1.05	2.6	5.38	37	117	121	277	3.1	3.6	138	1.1	9.6	221	6.7	314	10.4	35.1	1	2	2	5.77	2	2	2	1	1	2	10.2	88	11.59	NA	NA	NA	1.207
110972	12246.4019	12915.13804	2	16	1	14	4.2	79	18	23	20	98	121	1.1	3.2	4	15	59	157	275	4.2	3.8	137	0.2	9.6	156	7.4	101	3.9	27.1	NA	NA	3	NA	NA	NA	NA	1	NA	NA	27.8	93	29.89	NA	NA	NA	0.176
110973	34157.36696	38840.88011	2	72	3	21	4.1	86	20	28	18	102	56	0.81	3	5.16	15	128	164	285	3.8	4.2	142	0.4	10.3	217	7.1	131	4.6	27.6	1	2	2	5.38	2	2	2	2	2	2	10.8	103	10.49	NA	NA	NA	0.416
110974	4634.311556	5243.438347	2	8	4	NA	NA	NA	NA	NA	NA	NA	NA	NA	NA	NA	NA	NA	NA	NA	NA	NA	NA	NA	NA	NA	NA	NA	NA	16.8	NA	NA	2	NA	NA	NA	NA	NA	NA	NA	15.9	56	28.39	0.08	0.56	1.96	NA
110975	8905.027856	9169.904802	2	58	5	24	3.8	106	15	22	20	98	109	0.83	3.6	11.88	29	96	139	285	3.7	4.5	138	0.3	9.3	214	7.4	324	6.9	28	0	2	2	12.9	2	2	2	2	2	2	217.5	44	494.32	NA	NA	NA	0.993
110976	15192.34957	16602.34399	2	22	4	7	3.7	85	9	24	6	104	100	0.68	3.5	4.77	12	25	108	280	3.2	4.6	142	0.1	9.4	285	7.2	108	4.4	35.3	NA	NA	2	5.16	NA	NA	2	2	2	2	28.6	114	25.09	NA	NA	NA	0.979
110977	28241.39251	30456.91588	1	41	1	23	4.3	77	21	23	14	103	234	0.92	3.1	7.22	42	59	176	282	4.3	3.7	140	0.3	9.2	145	7.4	434	9.9	36.8	NA	1	2	NA	NA	NA	2	1	2	2	8.9	217	4.1	NA	NA	NA	0.445
110978	18917.14023	0	1	9	1	NA	NA	NA	NA	NA	NA	NA	NA	NA	NA	NA	NA	NA	NA	NA	NA	NA	NA	NA	NA	NA	NA	NA	NA	NA	NA	NA	2	NA	NA	NA	NA	NA	NA	NA	NA	NA	NA	NA	NA	NA	NA
110979	18050.13137	20487.65027	1	51	5	17	4.7	131	18	25	13	99	319	0.76	3.6	5.05	24	154	192	277	3.5	3.6	139	0.9	9.6	244	8.3	234	7.3	29.1	0	2	2	NA	2	2	2	2	2	2	2.3	30	7.67	NA	NA	NA	3.455
110980	30226.57196	31870.34786	2	13	3	NA	NA	NA	NA	NA	NA	NA	NA	NA	NA	NA	NA	NA	NA	NA	NA	NA	NA	NA	NA	NA	NA	NA	NA	49.5	NA	NA	2	NA	NA	NA	NA	NA	NA	NA	11.1	59	18.81	NA	NA	NA	NA
110981	14790.17329	14778.93396	2	39	3	13	4	56	14	21	7	102	61	0.69	2.9	5.61	11	72	151	279	3.7	2.9	141	0.4	9	170	6.9	60	4.6	35.7	NA	NA	2	6.11	NA	NA	2	1	1	2	10	65	15.38	NA	NA	NA	0.196
110982	5056.666657	5385.352352	2	0	3	NA	NA	NA	NA	NA	NA	NA	NA	NA	NA	NA	NA	NA	NA	NA	NA	NA	NA	NA	NA	NA	NA	NA	NA	NA	NA	NA	NA	NA	NA	NA	NA	NA	NA	NA	NA	NA	NA	NA	NA	NA	NA
110983	5228.52385	5565.388226	2	0	3	NA	NA	NA	NA	NA	NA	NA	NA	NA	NA	NA	NA	NA	NA	NA	NA	NA	NA	NA	NA	NA	NA	NA	NA	NA	NA	NA	NA	NA	NA	NA	NA	NA	NA	NA	NA	NA	NA	NA	NA	NA	NA
110984	118562.4006	133834.4065	2	44	3	13	4.1	45	15	27	21	98	36	0.64	2.6	4.66	6	32	128	282	4.2	4	140	0.3	9.1	179	6.7	79	6.8	30.3	NA	2	1	NA	NA	NA	2	1	1	2	5.3	69	7.68	0.08	0.56	1.29	1.178
110985	158769.0682	182004.2187	1	25	3	21	4.1	77	21	28	11	100	151	0.8	3.3	5.16	12	145	141	275	2.4	4	138	0.8	9.3	207	7.4	96	5.2	32.6	NA	NA	2	5.33	NA	NA	2	2	2	2	2.1	68	3.09	0.08	0.56	2.43	0.718
110986	67489.24178	67127.6734	2	68	3	14	3.9	80	18	23	14	101	117	1.05	3	5.72	35	78	236	278	3.8	4.8	139	0.2	9.4	206	6.9	341	6	42.8	1	1	1	NA	1	1	2	1	1	1	27.8	104	26.73	NA	NA	NA	NA
110987	8681.802388	9404.347121	1	51	4	17	4.4	47	19	26	16	104	335	1.43	2.7	4.83	14	79	152	287	3.8	4.3	144	0.7	9.1	186	7.1	61	5	21.8	0	2	3	NA	2	2	2	2	2	2	15.4	333	4.62	2.01	0.56	6.12	0.471
110988	19721.05057	19823.93212	1	18	1	15	4.3	115	17	24	10	102	196	0.88	3.2	5.11	12	76	151	278	3.5	4.1	140	0.4	9.3	117	7.5	102	5.8	30.6	NA	NA	2	NA	NA	NA	NA	1	NA	NA	5.3	122	4.34	NA	NA	NA	NA
110989	12958.02415	14002.46438	1	6	1	NA	NA	NA	NA	NA	NA	NA	NA	NA	NA	NA	NA	NA	NA	NA	NA	NA	NA	NA	NA	NA	NA	NA	NA	15.5	NA	NA	2	NA	NA	NA	NA	NA	NA	NA	13.6	40	34	NA	NA	NA	NA
110990	39333.98045	39962.78706	1	71	3	44	4.2	54	41	24	19	101	121	0.95	2.7	4.61	64	135	203	277	3.3	4.3	138	0.9	10	134	6.9	72	5.9	33.4	1	2	2	NA	2	2	1	1	2	2	13.3	271	4.91	0.46	0.56	9.33	0.649
110991	70945.09268	73160.74079	1	66	3	34	4	131	21	29	13	99	126	0.86	3.3	5	152	63	188	283	4.8	4.1	142	0.5	9.4	117	7.3	68	5	32.3	NA	2	2	NA	2	2	1	1	2	2	17.9	132	13.56	NA	NA	NA	0.595
110992	6257.208757	6708.264694	1	0	3	NA	NA	NA	NA	NA	NA	NA	NA	NA	NA	NA	NA	NA	NA	NA	NA	NA	NA	NA	NA	NA	NA	NA	NA	NA	NA	NA	NA	NA	NA	NA	NA	NA	NA	NA	NA	NA	NA	NA	NA	NA	NA
110993	44535.13455	52102.40116	1	60	3	10	4.3	88	13	27	15	99	138	0.89	2.9	8.6	11	58	196	283	3.3	4	140	0.3	9.4	173	7.2	104	3.7	26.4	0	2	1	NA	2	2	2	2	2	1	1251	148	845.27	NA	NA	NA	0.6
110994	10359.74877	12080.57544	1	9	5	NA	NA	NA	NA	NA	NA	NA	NA	NA	NA	NA	NA	NA	NA	NA	NA	NA	NA	NA	NA	NA	NA	NA	NA	15.5	NA	NA	2	NA	NA	NA	NA	NA	NA	NA	3.3	39	8.46	NA	NA	NA	1.143
110995	54911.12523	57869.79542	2	28	3	12	4	79	18	27	9	99	34	0.68	3.2	5.16	9	53	130	274	3.7	3.6	138	0.5	9	170	7.2	78	4.4	21.3	NA	NA	2	5.55	NA	NA	2	2	2	2	1.9	42	4.52	0.08	0.56	4.99	0.593
110996	4764.291372	4818.57293	1	70	4	NA	NA	NA	NA	NA	NA	NA	NA	NA	NA	NA	NA	NA	NA	NA	NA	NA	NA	NA	NA	NA	NA	NA	NA	30	1	2	1	NA	2	2	2	2	2	2	75.6	257	29.42	NA	NA	NA	0.355
110997	31596.23112	33534.59138	1	40	3	25	4.2	80	16	26	13	103	112	0.86	3.1	5.27	17	88	126	283	3	4.2	142	0.5	9.1	191	7.3	168	7.9	36.1	NA	2	2	5.55	NA	NA	2	1	2	2	10.4	271	3.84	NA	NA	NA	0.455
110998	28641.47847	30962.2585	2	25	3	16	3.2	74	20	23	9	101	51	0.52	3.9	4.11	13	89	132	273	4.4	3.8	138	0.2	9.2	214	7.1	110	3.5	31.6	NA	NA	2	NA	NA	NA	2	1	2	2	8.2	113	7.26	NA	NA	NA	0.415
110999	43200.02547	45212.47118	2	25	5	13	4.3	62	18	26	10	99	86	0.68	2.7	4.77	11	165	132	274	3.9	3.5	138	2.2	9.5	123	7	70	4.5	22.6	NA	NA	2	5.11	NA	NA	2	2	2	2	16.8	384	4.38	NA	NA	NA	0.154
111000	6149.427499	0	2	56	1	NA	NA	NA	NA	NA	NA	NA	NA	NA	NA	NA	NA	NA	NA	NA	NA	NA	NA	NA	NA	NA	NA	NA	NA	NA	NA	2	2	NA	1	2	1	2	2	2	NA	NA	NA	NA	NA	NA	NA
111001	2314.9207	2308.752192	1	1	5	NA	NA	NA	NA	NA	NA	NA	NA	NA	NA	NA	NA	NA	NA	NA	NA	NA	NA	NA	NA	NA	NA	NA	NA	NA	NA	NA	2	NA	NA	NA	NA	NA	NA	NA	NA	NA	NA	NA	NA	NA	NA
111002	16469.64956	17618.46068	2	79	4	22	3.8	100	22	33	24	103	120	0.86	3.2	4.83	44	79	217	283	2.7	3.9	140	0.8	9.2	225	7	63	3.9	21.6	NA	2	3	5.11	2	2	2	2	2	2	19.6	57	34.39	0.08	0.56	10.71	0.385
111003	109068.4252	117800.3642	2	23	3	14	4.7	52	15	26	12	102	55	0.67	3.2	4.39	10	119	118	280	3.9	4.2	141	0.4	9.4	150	7.9	70	4.3	18.4	NA	NA	2	NA	NA	NA	2	2	2	2	14.2	92	15.43	0.08	0.56	4.64	0.348
111004	18480.90145	20384.66267	2	10	3	NA	NA	NA	NA	NA	NA	NA	NA	NA	NA	NA	NA	NA	NA	NA	NA	NA	NA	NA	NA	NA	NA	NA	NA	24.6	NA	NA	2	NA	NA	NA	NA	NA	NA	NA	30.5	227	13.44	NA	NA	NA	0.255
111005	5954.572596	6138.638864	1	16	2	NA	NA	NA	NA	NA	NA	NA	NA	NA	NA	NA	NA	NA	NA	NA	NA	NA	NA	NA	NA	NA	NA	NA	NA	30.3	NA	NA	2	NA	NA	NA	NA	1	NA	NA	2.8	97	2.89	NA	NA	NA	0.832
111006	4018.61057	4152.568347	1	64	4	17	3.4	47	21	28	34	101	163	1.71	4	6.16	12	67	132	286	3.7	4.3	139	0.3	9.3	208	7.4	85	7.6	32.3	1	1	1	NA	2	2	2	1	2	1	280	55	509.09	NA	NA	NA	1.808
111007	217393.8695	251861.7969	1	26	3	24	4.5	98	17	25	10	99	88	0.88	3.1	4.33	16	71	89	277	4.3	4	140	0.4	9.5	152	7.6	75	6.4	22	NA	NA	2	4.88	NA	NA	2	2	2	2	24.4	274	8.91	0.08	0.56	3.96	0.376
111008	9076.019174	10075.08807	2	80	3	15	4.3	79	21	26	13	101	120	0.85	2.8	6.05	14	74	173	284	3.2	2.8	142	0.3	9.2	187	7.1	156	5.3	24.9	0	2	2	NA	2	2	2	2	2	2	58.1	35	166	NA	NA	NA	0.241
111009	8053.296025	8471.297623	2	11	4	NA	NA	NA	NA	NA	NA	NA	NA	NA	NA	NA	NA	NA	NA	NA	NA	NA	NA	NA	NA	NA	NA	NA	NA	26.5	NA	NA	2	NA	NA	NA	NA	NA	NA	NA	64	291	21.99	NA	NA	NA	0.268
111010	7094.963709	7370.007319	2	19	4	NA	NA	NA	NA	NA	NA	NA	NA	NA	NA	NA	NA	NA	NA	NA	NA	NA	NA	NA	NA	NA	NA	NA	NA	31.6	NA	NA	2	NA	NA	NA	NA	2	NA	NA	NA	NA	NA	NA	NA	NA	NA
111011	19121.97818	19455.51546	2	47	1	20	4.1	86	21	24	10	102	75	0.71	3.4	6.11	42	59	142	283	2.6	3.9	142	0.4	9.4	187	7.5	105	4.7	29.9	NA	1	1	6.33	NA	NA	2	2	2	2	1.7	22	7.73	NA	NA	NA	1.417
111012	18498.75575	20277.11313	2	65	5	42	3.9	143	52	25	10	100	156	0.52	3.2	9.77	169	96	188	281	2.7	3.8	139	0.3	9.5	192	7.1	199	3.6	25.8	0	1	1	10.5	2	2	2	1	2	2	105.7	46	229.78	0.59	0.56	10.48	NA
111013	5957.397196	0	2	76	5	NA	NA	NA	NA	NA	NA	NA	NA	NA	NA	NA	NA	NA	NA	NA	NA	NA	NA	NA	NA	NA	NA	NA	NA	NA	NA	2	3	NA	2	2	2	2	2	2	NA	NA	NA	NA	NA	NA	NA
111014	6350.696366	6491.764835	2	54	5	15	3.4	113	13	22	11	99	206	0.59	3	13.16	72	64	177	286	3.1	3.3	140	0.5	9.2	209	6.4	391	7.3	52.9	1	2	1	NA	1	2	2	1	2	2	111.5	218	51.15	NA	NA	NA	0.291
111015	12241.26394	12837.75058	2	16	1	20	4.4	83	17	27	11	102	69	0.65	3	4.77	56	74	141	282	4.2	4.1	142	0.3	9.5	118	7.4	72	3.3	20.4	NA	NA	2	NA	NA	NA	NA	2	NA	NA	4.8	121	3.97	NA	NA	NA	0.378
111016	8566.369567	0	1	80	4	NA	NA	NA	NA	NA	NA	NA	NA	NA	NA	NA	NA	NA	NA	NA	NA	NA	NA	NA	NA	NA	NA	NA	NA	NA	NA	2	2	NA	2	1	2	2	2	2	NA	NA	NA	NA	NA	NA	NA
111017	3677.575756	4167.120672	1	2	4	NA	NA	NA	NA	NA	NA	NA	NA	NA	NA	NA	NA	NA	NA	NA	NA	NA	NA	NA	NA	NA	NA	NA	NA	17.8	NA	NA	2	NA	NA	NA	NA	NA	NA	NA	NA	NA	NA	NA	NA	NA	NA
111018	8627.926112	8763.355972	1	80	4	14	3.8	74	23	28	19	100	161	1.24	3.4	5	22	76	184	281	3.6	4.3	140	0.3	9.3	159	7.2	95	7.6	24.1	1	2	2	NA	2	2	1	2	2	2	15.4	114	13.51	NA	NA	NA	0.259
111019	10421.05508	12438.82147	2	10	5	NA	NA	NA	NA	NA	NA	NA	NA	NA	NA	NA	NA	NA	NA	NA	NA	NA	NA	NA	NA	NA	NA	NA	NA	19.5	NA	NA	2	NA	NA	NA	NA	NA	NA	NA	10.4	189	5.5	NA	NA	NA	4.07
111020	2718.345908	2849.94253	1	16	4	14	4.5	47	17	28	9	103	189	0.82	2.5	5	10	95	136	281	3.9	3.9	142	0.3	9.8	139	7	72	5.8	29.2	NA	NA	2	5.22	NA	NA	NA	2	NA	NA	16.9	201	8.41	NA	NA	NA	0.206
111021	4985.287571	5480.535182	1	69	1	39	4	53	25	28	17	102	61	0.92	3.3	6.22	81	108	147	287	3.4	3.6	143	0.5	9.6	157	7.3	98	5.5	27	1	2	1	6.72	2	1	2	2	2	2	8.6	135	6.37	0.08	0.56	6.89	1.114
111022	12907.01166	13764.59049	1	9	3	NA	NA	NA	NA	NA	NA	NA	NA	NA	NA	NA	NA	NA	NA	NA	NA	NA	NA	NA	NA	NA	NA	NA	NA	20	NA	NA	2	NA	NA	NA	NA	NA	NA	NA	16.1	134	12.01	0.46	0.56	8.61	0.286
111023	43821.76883	48348.32739	2	61	3	22	3.9	101	13	25	15	102	44	0.75	3.3	4.27	35	61	137	285	4.5	4.2	143	0.6	8.8	140	7.2	217	4.5	39	1	2	2	NA	2	2	2	1	2	2	158.4	316	50.13	1.66	0.56	17.73	0.191
111024	7846.304403	8306.425655	2	7	1	NA	NA	NA	NA	NA	NA	NA	NA	NA	NA	NA	NA	NA	NA	NA	NA	NA	NA	NA	NA	NA	NA	NA	NA	20.6	NA	NA	2	NA	NA	NA	NA	NA	NA	NA	NA	NA	NA	NA	NA	NA	NA
111025	11145.01272	13160.5468	1	80	3	13	4.5	52	18	25	27	101	68	1.38	2.6	7.05	26	151	142	288	3.7	3.8	141	0.8	9.9	144	7.1	131	7.4	27.8	NA	2	2	7.16	2	2	2	2	2	2	800	107	747.66	NA	NA	NA	NA
111026	9478.697132	10259.14228	2	2	3	NA	NA	NA	NA	NA	NA	NA	NA	NA	NA	NA	NA	NA	NA	NA	NA	NA	NA	NA	NA	NA	NA	NA	NA	18.1	NA	NA	2	NA	NA	NA	NA	NA	NA	NA	NA	NA	NA	NA	NA	NA	NA
111027	41355.93285	43963.7028	1	21	4	NA	NA	NA	NA	NA	NA	NA	NA	NA	NA	NA	NA	NA	NA	NA	NA	NA	NA	NA	NA	NA	NA	NA	NA	19.8	NA	NA	2	5.83	NA	NA	2	2	2	2	4	36	11.11	0.6	0.56	3.29	NA
111028	12245.0576	14406.43586	2	2	4	NA	NA	NA	NA	NA	NA	NA	NA	NA	NA	NA	NA	NA	NA	NA	NA	NA	NA	NA	NA	NA	NA	NA	NA	17.1	NA	NA	2	NA	NA	NA	NA	NA	NA	NA	NA	NA	NA	NA	NA	NA	NA
111029	7185.477455	7723.511622	2	10	4	NA	NA	NA	NA	NA	NA	NA	NA	NA	NA	NA	NA	NA	NA	NA	NA	NA	NA	NA	NA	NA	NA	NA	NA	20.1	NA	NA	2	NA	NA	NA	NA	NA	NA	NA	7.1	96	7.4	NA	NA	NA	0.372
111030	135456.6361	137529.7927	2	69	3	14	4	57	17	25	24	98	91	1.15	2.5	5.22	9	65	181	276	3.9	4.4	136	0.2	9.1	228	6.5	98	6.1	25.2	1	2	2	NA	1	2	2	2	2	2	2.1	23	9.13	NA	NA	NA	2.592
111031	23312.28383	24516.40083	1	30	5	28	4.5	112	18	28	15	95	96	0.94	3.4	5.22	35	71	NA	276	4.6	3.4	138	0.3	9.3	245	7.9	608	7.3	27.1	NA	NA	2	NA	NA	NA	2	2	2	2	0.5	17	2.94	NA	NA	NA	2.505
111032	93203.19442	109064.3984	2	47	3	30	4.1	80	29	26	9	98	75	0.56	3.5	5.22	20	105	167	274	3.6	4.1	138	0.6	9.6	207	7.6	144	4.3	44	NA	2	2	5.55	NA	NA	2	1	2	2	31.1	253	12.29	NA	NA	NA	0.152
111033	18793.48906	0	2	5	3	NA	NA	NA	NA	NA	NA	NA	NA	NA	NA	NA	NA	NA	NA	NA	NA	NA	NA	NA	NA	NA	NA	NA	NA	NA	NA	NA	2	NA	NA	NA	NA	NA	NA	NA	NA	NA	NA	NA	NA	NA	NA
111034	39437.42569	0	2	59	3	NA	NA	NA	NA	NA	NA	NA	NA	NA	NA	NA	NA	NA	NA	NA	NA	NA	NA	NA	NA	NA	NA	NA	NA	NA	NA	2	2	NA	2	2	2	2	2	2	NA	NA	NA	NA	NA	NA	NA
111035	3225.534436	3549.948778	1	0	3	NA	NA	NA	NA	NA	NA	NA	NA	NA	NA	NA	NA	NA	NA	NA	NA	NA	NA	NA	NA	NA	NA	NA	NA	NA	NA	NA	NA	NA	NA	NA	NA	NA	NA	NA	NA	NA	NA	NA	NA	NA	NA
111036	75264.87612	76556.04711	1	75	3	23	4.3	90	19	28	22	99	96	1.31	3.1	6.49	65	107	151	286	4.4	4	141	0.4	9.8	286	7.4	303	7.3	33.8	0	2	1	NA	2	2	2	1	2	2	10.7	107	10	NA	NA	NA	0.415
111037	203782.1894	226863.3932	1	34	3	20	4.6	63	23	32	13	102	147	0.85	2.7	5	13	146	135	286	3.3	4.2	144	0.7	9.5	131	7.3	81	4.7	23.4	NA	NA	2	5.55	NA	NA	2	2	2	2	1.8	40	4.5	0.08	0.56	3.48	1.151
111038	5505.735994	5825.448472	2	14	4	NA	NA	NA	NA	NA	NA	NA	NA	NA	NA	NA	NA	NA	NA	NA	NA	NA	NA	NA	NA	NA	NA	NA	NA	31.3	NA	NA	2	NA	NA	NA	NA	NA	NA	NA	1.5	32	4.69	NA	NA	NA	2.524
111039	12483.68721	13126.86199	2	44	5	11	3.9	71	15	22	12	104	96	0.52	3.4	5.5	10	34	158	281	3.6	4.2	141	0.1	8.9	170	7.3	43	3.1	22.3	NA	1	3	5.61	NA	NA	2	2	2	2	13.1	97	13.51	NA	NA	NA	0.6
111040	3219.097704	3497.376908	2	48	4	30	3.7	97	20	28	11	105	87	0.86	3.4	5.33	19	77	173	286	2.9	3.7	144	0.4	9.1	158	7.1	128	7.1	27.8	NA	1	1	NA	NA	NA	2	1	2	2	6.2	64	9.69	0.08	0.56	3.15	1.236
111041	15106.41931	16198.94158	1	17	3	10	4.7	99	17	24	15	104	267	0.97	2.4	5.16	11	97	161	286	4.6	4.2	143	0.4	9.5	152	7.1	111	6	25.4	NA	NA	2	5.27	NA	NA	NA	2	NA	NA	12.1	286	4.23	NA	NA	NA	NA
111042	28947.0857	29683.8769	1	41	3	19	4.3	82	17	24	18	101	215	0.83	3	5.16	36	84	152	285	3.3	4.3	142	0.3	9.6	247	7.3	183	4.9	38.7	NA	1	2	NA	NA	NA	2	1	2	2	21.6	415	5.2	NA	NA	NA	0.368
111043	8086.304519	8494.518285	1	77	5	42	4.1	78	27	26	11	102	59	0.85	3.6	5.05	119	174	138	282	3.3	3.6	142	0.8	8.9	183	7.7	188	6.2	21.8	0	2	2	5.61	2	2	2	2	2	2	4.9	131	3.74	NA	NA	NA	0.511
111044	13130.63078	13941.70481	2	15	5	NA	NA	NA	NA	NA	NA	NA	NA	NA	NA	NA	NA	NA	NA	NA	NA	NA	NA	NA	NA	NA	NA	NA	NA	25.6	NA	NA	2	NA	NA	NA	NA	NA	NA	NA	16.3	182	8.96	NA	NA	NA	0.818
111045	22354.82069	22842.90173	1	38	1	13	4.3	87	19	27	24	102	83	0.72	3.2	5.05	11	76	146	287	3.2	4.4	142	0.3	9.3	201	7.5	70	4.9	28.6	NA	NA	2	5.83	NA	NA	2	2	2	2	2.8	60	4.67	NA	NA	NA	1.744
111046	26346.77186	27432.48071	2	50	4	12	3.5	66	11	23	12	100	32	0.55	3.6	6.33	22	40	134	273	3.3	3.8	136	0.1	8.9	159	7.1	85	4.3	43.3	0	2	2	6.72	2	2	2	1	2	2	19.4	202	9.6	0.08	0.56	6.17	0.663
111047	13597.78041	15321.00139	2	74	1	14	4.1	74	15	28	15	96	55	0.64	3.4	8.88	11	114	128	282	4.1	4.1	139	0.6	9.9	234	7.5	127	3.3	23.8	0	1	1	9.44	1	2	2	2	2	2	5.8	67	8.66	NA	NA	NA	0.588
111048	2669.804017	3000.655454	1	13	4	14	3.9	231	20	26	10	104	151	0.68	2.9	4.72	11	65	189	281	4.7	3.8	142	0.3	9.7	112	6.8	30	4.8	19.4	NA	NA	2	NA	NA	NA	NA	NA	NA	NA	9.1	244	3.73	0.72	1.34	10.5	0.219
111049	15322.06568	18043.20036	1	2	1	NA	NA	NA	NA	NA	NA	NA	NA	NA	NA	NA	NA	NA	NA	NA	NA	NA	NA	NA	NA	NA	NA	NA	NA	NA	NA	NA	2	NA	NA	NA	NA	NA	NA	NA	NA	NA	NA	NA	NA	NA	NA
111050	10961.74764	12081.68008	1	46	5	40	3.7	65	29	25	12	100	143	0.9	2.9	5.5	22	137	141	277	3.6	4	139	0.5	8.5	226	6.6	254	5.2	27.6	NA	2	2	5.94	NA	NA	2	1	2	2	3.1	80	3.88	NA	NA	NA	1.551
111051	95686.17999	101369.1833	2	23	3	NA	NA	NA	NA	NA	NA	NA	NA	NA	NA	NA	NA	NA	NA	NA	NA	NA	NA	NA	NA	NA	NA	NA	NA	22.1	NA	NA	2	NA	NA	NA	2	2	2	2	50.4	422	11.94	NA	NA	NA	0.094
111052	8730.309465	10427.74632	2	4	5	NA	NA	NA	NA	NA	NA	NA	NA	NA	NA	NA	NA	NA	NA	NA	NA	NA	NA	NA	NA	NA	NA	NA	NA	15.2	NA	NA	2	NA	NA	NA	NA	NA	NA	NA	5.4	23	23.48	0.79	0.83	5.06	NA
111053	24179.80996	25547.782	2	64	5	5	3.1	135	10	23	14	107	27	0.68	3.3	5.11	22	39	127	287	3.7	4.2	144	0.1	8.9	159	6.4	109	4.2	19	NA	1	2	NA	2	2	2	2	2	2	44.2	171	25.85	0.08	0.56	3.16	0.315
111054	4513.387605	4620.717514	1	64	2	31	4	77	40	26	17	101	93	1.01	3	4.83	71	66	128	278	3	3.7	139	0.3	9.1	220	7	345	5.6	26.1	0	2	2	NA	2	2	2	2	2	2	9.1	107	8.5	0.08	0.56	5.06	0.624
111055	18520.58929	18706.32604	1	18	1	17	4.8	79	17	27	15	98	127	0.69	3.3	5.44	11	92	200	282	4.5	4.2	141	0.9	9.5	144	8.1	83	4.7	35	NA	NA	2	NA	NA	NA	NA	1	NA	NA	9.9	166	5.96	0.5	0.56	5.82	0.84
111056	10840.48717	11004.76655	1	17	2	13	4.5	92	18	27	19	101	195	0.97	2.4	5.5	12	92	174	284	3.4	4.6	141	0.3	9.6	143	6.9	99	5.5	21.8	NA	NA	2	NA	NA	NA	NA	2	NA	NA	1.5	35	4.29	NA	NA	NA	0.037
111057	8188.469187	9353.976085	1	12	5	19	4.4	217	20	27	6	100	109	0.48	3.1	4.77	18	92	181	274	5	4.2	139	0.3	10.1	140	7.5	92	6.8	30.6	NA	NA	2	NA	NA	NA	NA	NA	NA	NA	2.3	50	4.6	NA	NA	NA	1.41
111058	15782.63435	16869.56822	2	32	1	68	3.7	80	27	24	9	105	80	0.52	3	5.88	47	72	172	284	3.1	3.9	143	0.3	8.8	153	6.7	79	4.6	41.6	NA	NA	2	6.16	NA	NA	2	1	2	2	25.3	176	14.38	NA	NA	NA	0.207
111059	4664.889352	4864.558402	2	14	4	NA	NA	NA	NA	NA	NA	NA	NA	NA	NA	NA	NA	NA	NA	NA	NA	NA	NA	NA	NA	NA	NA	NA	NA	28	NA	NA	2	NA	NA	NA	NA	NA	NA	NA	12.7	244	5.2	0.53	0.56	7.82	0.271
111060	4908.310814	5301.404153	2	23	4	7	4	73	9	23	13	106	38	0.68	2.9	4.94	17	44	106	277	4	3.9	139	0.4	8.8	155	6.9	39	4.5	35	NA	NA	2	5.33	NA	NA	2	1	2	2	4.8	92	5.22	0.39	0.56	3.89	0.549
111061	19787.88573	22670.56381	1	1	3	NA	NA	NA	NA	NA	NA	NA	NA	NA	NA	NA	NA	NA	NA	NA	NA	NA	NA	NA	NA	NA	NA	NA	NA	NA	NA	NA	2	NA	NA	NA	NA	NA	NA	NA	NA	NA	NA	NA	NA	NA	NA
111062	25663.15729	28551.37211	1	55	5	17	3.7	73	15	21	40	103	158	2.21	2.9	9.99	14	74	188	296	4	4.8	141	0.2	9	342	6.6	322	7.3	24.9	0	2	1	NA	2	2	2	2	1	1	1779	64	2779.69	0.08	0.56	4.59	1.765
111063	15495.14786	16525.50654	2	60	2	20	4.5	79	23	26	14	105	312	0.73	2.6	5	10	75	232	287	3.1	3.9	144	0.5	9.7	194	7.1	74	2.8	22.5	1	2	2	NA	2	2	2	2	2	2	3.7	54	6.85	NA	NA	NA	0.614
111064	10546.96944	11066.45654	1	45	3	23	4.4	59	15	23	20	95	128	0.83	2.8	21.82	29	77	139	291	3.8	4.2	136	0.7	9.4	206	7.2	398	6.3	34.1	NA	2	1	NA	NA	NA	2	1	1	2	38.1	37	102.97	NA	NA	NA	4.426
111065	17453.33256	17275.24866	2	48	1	16	3.7	47	17	25	13	100	36	0.64	3.5	5.94	16	140	150	278	3.6	3.9	139	0.4	8.8	166	7.2	161	4.6	50.3	NA	1	2	6.44	NA	NA	2	1	2	2	7.5	66	11.36	0.08	0.56	0.93	0.375
111066	8888.418794	9724.303658	2	16	3	9	4.2	75	15	21	13	104	56	0.73	2.9	4.66	9	65	130	288	3.9	4.2	145	0.3	9	128	7.1	57	2.8	22.9	NA	NA	2	NA	NA	NA	NA	2	NA	NA	17.3	263	6.58	NA	NA	NA	0.313
111067	19362.02662	22536.55519	2	80	3	11	3.6	124	20	24	18	102	94	1.02	2.6	4.61	20	96	194	282	3.7	3.8	141	0.8	9	305	6.2	157	6	28.3	0	2	2	5	2	2	1	2	2	2	25.1	282	8.9	0.22	0.56	59.11	0.162
111068	68499.26687	78690.46604	1	29	3	15	4.7	52	20	28	12	101	113	1.09	2.9	4.94	13	64	NA	282	4.1	4.5	142	0.6	9.9	174	7.6	85	5.7	23.2	NA	NA	2	5.33	NA	NA	2	2	2	2	4.8	155	3.1	NA	NA	NA	0.861
111069	12211.74114	13105.51277	1	42	4	11	4.4	61	23	26	13	101	235	0.94	2.7	4.72	18	67	NA	279	3.9	4.3	140	0.2	9.5	124	7.1	55	4	21.5	NA	1	2	NA	NA	NA	2	2	2	2	2.3	56	4.11	0.08	0.56	29.57	0.529
111070	3629.656596	3929.376697	1	0	5	NA	NA	NA	NA	NA	NA	NA	NA	NA	NA	NA	NA	NA	NA	NA	NA	NA	NA	NA	NA	NA	NA	NA	NA	NA	NA	NA	NA	NA	NA	NA	NA	NA	NA	NA	NA	NA	NA	NA	NA	NA	NA
111071	18645.25258	20847.692	1	22	1	44	4.2	86	22	29	14	101	160	1.16	2.7	5.22	45	162	155	283	3.5	3.7	142	1	9.3	194	6.9	119	8.9	35.9	NA	NA	2	5.61	NA	NA	2	2	2	2	9.5	283	3.36	1.02	0.91	9.7	NA
111072	19990.21744	21696.48114	1	10	5	NA	NA	NA	NA	NA	NA	NA	NA	NA	NA	NA	NA	NA	NA	NA	NA	NA	NA	NA	NA	NA	NA	NA	NA	16.5	NA	NA	2	NA	NA	NA	NA	NA	NA	NA	6.1	102	5.98	0.86	0.56	6.78	NA
111073	8450.147958	9123.875858	2	18	4	12	4	84	13	23	10	106	168	0.67	3.6	4.22	13	54	159	283	4.1	3.8	143	0.3	9.1	126	7.6	72	4.2	37.8	NA	NA	2	NA	NA	NA	NA	2	NA	NA	18.5	217	8.53	NA	NA	NA	0.549
111074	5380.841885	5701.119403	2	6	4	NA	NA	NA	NA	NA	NA	NA	NA	NA	NA	NA	NA	NA	NA	NA	NA	NA	NA	NA	NA	NA	NA	NA	NA	17.5	NA	NA	2	NA	NA	NA	NA	NA	NA	NA	15.2	160	9.5	NA	NA	NA	NA
111075	7874.587226	8487.284152	1	51	4	27	4.4	49	31	27	15	101	543	0.94	2.8	5.66	28	128	166	277	3.6	4	138	0.3	9.6	180	7.2	33	4.6	29.1	0	2	2	5.88	2	2	2	2	2	2	3.9	207	1.88	NA	NA	NA	1.465
111076	2912.481635	3224.439996	2	0	4	NA	NA	NA	NA	NA	NA	NA	NA	NA	NA	NA	NA	NA	NA	NA	NA	NA	NA	NA	NA	NA	NA	NA	NA	NA	NA	NA	NA	NA	NA	NA	NA	NA	NA	NA	NA	NA	NA	NA	NA	NA	NA
111077	12521.33586	13280.90046	2	67	1	41	3.6	77	37	22	16	103	89	0.81	2.6	5.38	54	116	182	279	3.3	3.9	139	1.3	9.1	162	6.2	170	8	27.9	0	1	2	NA	1	1	1	1	2	2	941	53	1775.47	NA	NA	NA	1.065
111078	8568.025527	8777.568251	2	67	3	44	4.1	53	43	29	21	103	177	0.66	2.4	4.55	10	64	218	291	3.7	3.8	145	1.1	9.4	180	6.5	78	4.5	23.3	0	1	2	NA	2	2	2	2	2	2	19.8	102	19.41	0.08	0.56	25.5	0.525
111079	22169.61042	24069.92131	2	31	5	8	4.2	55	16	28	9	100	103	0.75	3.6	5	9	38	124	278	3.9	3.7	140	0.5	9.3	169	7.8	74	4.4	21.2	NA	NA	2	NA	NA	NA	2	2	2	2	1.1	46	2.39	NA	NA	NA	0.714
111080	71775.73921	79961.40711	2	11	3	NA	NA	NA	NA	NA	NA	NA	NA	NA	NA	NA	NA	NA	NA	NA	NA	NA	NA	NA	NA	NA	NA	NA	NA	15	NA	NA	2	NA	NA	NA	NA	NA	NA	NA	3.4	23	14.78	0.08	0.56	NA	0.065
111081	11507.18227	12117.98896	1	67	4	81	3.7	119	91	28	14	103	90	1.01	3.8	4.88	386	97	135	289	3.3	4.7	145	0.5	9	168	7.5	81	6.4	21	1	2	2	NA	2	2	2	2	2	2	110.8	251	44.14	NA	NA	NA	0.585
111082	7100.152823	7548.41245	2	17	4	14	4.4	84	20	24	11	101	79	0.73	3	4.55	15	117	155	274	4.3	3.9	138	0.2	9.4	178	7.4	78	3.7	24.3	NA	NA	2	NA	NA	NA	NA	2	NA	NA	7.2	165	4.36	NA	NA	NA	0.414
111083	28751.14355	30206.91212	1	28	2	51	4.5	72	110	25	14	99	4282	0.91	2.8	5.33	26	77	240	278	4.1	4	139	0.6	9.6	164	7.3	110	4.9	31	NA	NA	2	NA	NA	NA	2	1	2	2	19.5	314	6.21	NA	NA	NA	0.475
111084	8210.583402	8956.819616	2	10	3	NA	NA	NA	NA	NA	NA	NA	NA	NA	NA	NA	NA	NA	NA	NA	NA	NA	NA	NA	NA	NA	NA	NA	NA	21	NA	NA	2	NA	NA	NA	NA	NA	NA	NA	5.8	118	4.92	NA	NA	NA	1.471
111085	19374.24924	21574.72337	2	22	4	8	3.9	68	15	21	13	102	87	0.89	3.4	4.22	10	114	131	278	3.2	4.6	140	1	9.3	200	7.3	54	4.3	27.9	NA	NA	2	NA	NA	NA	2	1	2	2	61.9	189	32.75	NA	NA	NA	0.567
111086	18704.24762	0	1	62	1	NA	NA	NA	NA	NA	NA	NA	NA	NA	NA	NA	NA	NA	NA	NA	NA	NA	NA	NA	NA	NA	NA	NA	NA	NA	NA	2	2	NA	2	2	2	1	2	2	NA	NA	NA	NA	NA	NA	NA
111087	19075.6232	22398.98105	1	13	3	12	5.2	276	20	25	12	97	85	0.5	2.8	4.55	14	105	179	275	6	4.1	138	0.4	10.1	192	8	84	4.7	15.7	NA	NA	2	NA	NA	NA	NA	NA	NA	NA	26.4	60	44	NA	NA	NA	1.094
111088	16400.79953	18125.28871	1	38	4	NA	NA	NA	NA	NA	NA	NA	NA	NA	NA	NA	NA	NA	NA	NA	NA	NA	NA	NA	NA	NA	NA	NA	NA	37.1	NA	NA	2	NA	NA	NA	2	1	2	2	NA	NA	NA	NA	NA	NA	NA
111089	14815.16395	15095.91216	2	39	4	10	3.8	61	15	27	8	104	119	0.62	3.1	4.5	17	97	167	280	3.4	3.7	142	0.6	9.2	180	6.9	77	1.9	24.5	NA	NA	3	NA	NA	NA	2	1	2	2	25.7	174	14.77	NA	NA	NA	0.242
111090	6776.159262	7015.374183	2	15	1	10	4.6	103	14	26	10	98	69	0.5	2.8	5.05	15	139	109	276	3.6	4	139	1.2	9.9	181	7.4	68	2.3	20.5	NA	NA	2	5.5	NA	NA	NA	NA	NA	NA	29.4	70	42	0.08	0.83	1.75	NA
111091	12179.67726	13211.84552	2	15	4	12	3.7	104	10	24	14	106	93	0.55	3.5	4.88	17	55	191	285	4.5	4.5	143	0.1	9.2	144	7.2	67	3.8	45.9	NA	NA	2	NA	NA	NA	NA	NA	NA	NA	15.7	139	11.29	NA	NA	NA	0.687
111092	96355.41914	96188.50263	2	66	3	17	4	100	14	22	38	97	111	0.99	3.4	9.71	25	54	87	285	3.1	4.4	136	0.3	10	190	7.4	788	7.6	39.3	1	2	1	NA	2	2	2	1	2	2	46	99	46.46	0.08	0.56	5.68	0.218
111093	3092.126647	3389.083937	1	8	4	NA	NA	NA	NA	NA	NA	NA	NA	NA	NA	NA	NA	NA	NA	NA	NA	NA	NA	NA	NA	NA	NA	NA	NA	17.9	NA	NA	2	NA	NA	NA	NA	NA	NA	NA	7.8	129	6.05	NA	NA	NA	0.491
111094	10178.35387	11051.67435	1	35	4	11	3.4	96	16	29	11	100	208	0.88	4.3	5	15	50	134	282	3.6	4.6	142	0.3	9	217	7.7	84	7.5	86.2	NA	NA	2	5.33	NA	NA	2	1	1	2	25.6	140	18.29	NA	NA	NA	NA
111095	5353.146736	5513.011495	2	65	4	17	4.2	140	22	28	11	100	152	0.77	2.8	5.27	19	58	157	277	3.8	3.9	139	0.4	9.6	188	7	77	5	26.5	1	2	2	5.44	2	2	2	1	2	2	1	24	4.17	NA	NA	NA	2.795
111096	8410.361886	8904.588161	2	32	4	16	3.6	51	21	25	9	103	133	0.82	3.1	4.11	78	121	123	280	2.7	3.6	142	0.2	9.1	202	6.7	109	4.4	23	NA	NA	2	NA	NA	NA	2	2	2	2	7.6	195	3.9	NA	NA	NA	0.937
111097	10601.88632	11631.88694	1	77	3	16	3.4	79	17	20	23	105	128	0.93	3	5.55	30	68	173	289	3.6	4.1	143	0.5	8.4	131	6.4	155	5.1	26.1	1	1	2	NA	2	2	1	1	2	2	10.6	89	11.91	NA	NA	NA	4.063
111098	86115.08576	97463.55601	1	45	3	22	5	44	22	27	17	101	230	1.05	2.1	4.94	24	110	200	284	3.4	3.9	142	0.6	9.5	293	7.1	134	6.6	30.5	NA	2	2	NA	NA	NA	2	1	2	2	5.8	125	4.64	NA	NA	NA	0.656
111099	18992.50978	22504.52765	1	5	3	NA	NA	NA	NA	NA	NA	NA	NA	NA	NA	NA	NA	NA	NA	NA	NA	NA	NA	NA	NA	NA	NA	NA	NA	14	NA	NA	2	NA	NA	NA	NA	NA	NA	NA	6	29	20.69	0.08	0.56	1.29	NA
111100	15566.15086	16946.96481	2	5	2	NA	NA	NA	NA	NA	NA	NA	NA	NA	NA	NA	NA	NA	NA	NA	NA	NA	NA	NA	NA	NA	NA	NA	NA	16.4	NA	NA	2	NA	NA	NA	NA	NA	NA	NA	14.5	132	10.98	0.47	0.56	7.78	NA
111101	10727.88452	11844.22147	1	5	4	NA	NA	NA	NA	NA	NA	NA	NA	NA	NA	NA	NA	NA	NA	NA	NA	NA	NA	NA	NA	NA	NA	NA	NA	16.4	NA	NA	2	NA	NA	NA	NA	NA	NA	NA	2.8	46	6.09	0.08	0.56	1.89	NA
111102	5520.030024	5893.614407	1	67	4	19	4	70	18	30	11	100	158	1	2.9	5.77	16	82	163	287	3	4.4	144	0.6	8.9	161	6.9	72	6.6	33.2	0	2	2	NA	2	2	2	2	2	2	16.5	99	16.67	NA	NA	NA	0.238
111103	8690.296634	9762.565905	1	15	5	27	4	389	25	22	10	100	303	0.55	3.3	5.11	12	23	217	271	4.3	4.4	136	0.1	9.5	119	7.3	61	4.8	25.8	NA	NA	2	5.55	NA	NA	NA	NA	NA	NA	8.1	138	5.87	NA	NA	NA	0.492
111104	6027.153083	6532.674455	2	10	2	NA	NA	NA	NA	NA	NA	NA	NA	NA	NA	NA	NA	NA	NA	NA	NA	NA	NA	NA	NA	NA	NA	NA	NA	19.3	NA	NA	2	NA	NA	NA	NA	NA	NA	NA	4.2	23	18.26	0.08	0.56	2.72	NA
111105	16208.02519	17025.77718	1	66	5	26	4.2	111	19	26	12	106	57	1.06	1.9	4.88	35	66	111	288	3.1	3.8	145	0.3	9.1	159	6.1	131	5	33.2	1	1	1	NA	2	1	2	1	2	2	7.1	172	4.13	NA	NA	NA	0.733
111106	2797.411668	3270.306551	1	8	4	NA	NA	NA	NA	NA	NA	NA	NA	NA	NA	NA	NA	NA	NA	NA	NA	NA	NA	NA	NA	NA	NA	NA	NA	16.8	NA	NA	2	NA	NA	NA	NA	NA	NA	NA	3.2	105	3.05	NA	NA	NA	NA
111107	7587.729105	7815.174121	2	31	4	9	3.9	56	12	24	16	107	114	0.76	3.3	5.16	17	42	141	286	4	3.2	143	0.4	9	187	7.2	59	4.7	36.8	NA	NA	2	5.61	NA	NA	2	1	2	2	20.8	218	9.54	NA	NA	NA	0.273
111108	14336.16801	15627.44765	2	7	3	NA	NA	NA	NA	NA	NA	NA	NA	NA	NA	NA	NA	NA	NA	NA	NA	NA	NA	NA	NA	NA	NA	NA	NA	16.8	NA	NA	2	NA	NA	NA	NA	NA	NA	NA	27	141	19.15	NA	NA	NA	0.473
111109	20901.09911	22817.42057	1	49	1	51	4	52	32	26	14	105	149	0.86	2.9	6.55	50	108	170	288	2.6	4.4	144	0.6	8.4	208	6.9	123	5.4	31.9	NA	2	2	6.94	NA	NA	2	2	2	2	4.5	59	7.63	0.7	0.56	6.21	0.703
111110	18467.69661	18950.70651	2	45	3	9	4.3	55	16	25	11	100	96	0.78	3	4.83	13	89	140	273	2.8	3.4	137	0.3	9.4	193	7.3	152	5.3	42.6	NA	1	2	NA	NA	NA	2	1	2	2	1.2	44	2.73	NA	NA	NA	0.367
111111	16259.34367	17525.86828	2	8	1	NA	NA	NA	NA	NA	NA	NA	NA	NA	NA	NA	NA	NA	NA	NA	NA	NA	NA	NA	NA	NA	NA	NA	NA	17.4	NA	NA	2	NA	NA	NA	NA	NA	NA	NA	26.1	153	17.06	NA	NA	NA	0.266
111112	6349.963326	6906.01452	1	45	5	22	4.3	65	25	28	21	101	831	1.18	3.1	4.88	17	75	166	286	4.5	4.1	142	0.6	9.8	163	7.4	184	7.4	21.8	NA	2	2	NA	NA	NA	2	2	2	2	8.3	211	3.93	2.47	0.56	140.24	0.66
111113	21088.30429	0	2	5	3	NA	NA	NA	NA	NA	NA	NA	NA	NA	NA	NA	NA	NA	NA	NA	NA	NA	NA	NA	NA	NA	NA	NA	NA	NA	NA	NA	2	NA	NA	NA	NA	NA	NA	NA	NA	NA	NA	NA	NA	NA	NA
111114	9314.584926	10437.11272	2	80	1	10	3.2	57	19	29	28	102	65	1.19	3.5	3.94	21	47	211	293	5	4	145	0.4	7.9	129	6.7	96	7.9	29	NA	1	1	4.39	1	2	2	2	2	1	7.1	64	11.09	NA	NA	NA	NA
111115	10816.88727	13540.28954	1	80	3	37	3.5	165	35	29	21	95	53	0.91	4.8	4.55	81	67	214	274	4	4.9	136	0.5	8.8	170	8.3	104	5.1	23	1	1	2	NA	2	2	2	2	2	2	6.6	107	6.17	NA	NA	NA	0.45
111116	16874.12732	17416.87465	1	6	2	NA	NA	NA	NA	NA	NA	NA	NA	NA	NA	NA	NA	NA	NA	NA	NA	NA	NA	NA	NA	NA	NA	NA	NA	16.4	NA	NA	2	NA	NA	NA	NA	NA	NA	NA	29.5	148	19.93	NA	NA	NA	0.114
111117	34740.0168	35310.55521	2	60	5	16	3.6	117	14	22	19	102	27	0.96	2.8	7.77	15	76	177	282	3.8	4.5	139	0.3	9.2	166	6.4	125	5	45	0	2	2	NA	1	1	1	1	2	2	12.1	109	11.1	NA	NA	NA	0.465
111118	32015.65658	34611.48359	2	28	3	NA	NA	NA	NA	NA	NA	NA	NA	NA	NA	NA	NA	NA	NA	NA	NA	NA	NA	NA	NA	NA	NA	NA	NA	22.2	NA	NA	2	NA	NA	NA	2	2	2	2	NA	NA	NA	NA	NA	NA	NA
111119	7097.96072	7560.152276	1	10	4	NA	NA	NA	NA	NA	NA	NA	NA	NA	NA	NA	NA	NA	NA	NA	NA	NA	NA	NA	NA	NA	NA	NA	NA	14.5	NA	NA	2	NA	NA	NA	NA	NA	NA	NA	3.4	63	5.4	NA	NA	NA	0.063
111120	46427.53997	48436.73409	1	50	1	138	3.7	95	174	28	17	94	101	1.35	4.2	10.32	338	37	189	290	4.7	3.4	142	0.4	9.6	155	7.9	161	6.1	30.4	NA	2	1	NA	2	2	2	1	2	2	32.8	61	53.77	NA	NA	NA	NA
111121	7965.484283	8562.544159	1	0	3	NA	NA	NA	NA	NA	NA	NA	NA	NA	NA	NA	NA	NA	NA	NA	NA	NA	NA	NA	NA	NA	NA	NA	NA	NA	NA	NA	NA	NA	NA	NA	NA	NA	NA	NA	NA	NA	NA	NA	NA	NA	NA
111122	10168.96049	10630.29962	1	29	2	23	3.9	101	13	26	9	103	105	0.95	3.3	5.05	19	54	145	281	3.6	3.9	142	0.4	8.7	140	7.2	117	5.4	31.5	NA	NA	2	5.27	NA	NA	2	2	2	2	18.8	350	5.37	NA	NA	NA	0.301
111123	7250.699722	8489.278054	1	80	3	19	3.9	51	18	26	32	104	45	2.17	2.9	4.88	38	50	143	288	3.1	4.3	141	0.5	9.6	206	6.8	166	8.2	29.6	1	2	2	NA	2	2	1	2	1	1	119.9	127	94.41	NA	NA	NA	1.635
111124	53565.46128	58828.29757	2	24	3	9	4	47	12	22	8	106	74	0.57	2.5	4.61	8	102	134	279	3.1	4.3	141	0.5	8.8	118	6.5	31	2.6	21	NA	NA	2	5.22	NA	NA	2	2	2	2	5.1	57	8.95	0.64	0.56	4.99	1.157
111125	3904.086499	4229.144381	1	0	2	NA	NA	NA	NA	NA	NA	NA	NA	NA	NA	NA	NA	NA	NA	NA	NA	NA	NA	NA	NA	NA	NA	NA	NA	NA	NA	NA	NA	NA	NA	NA	NA	NA	NA	NA	NA	NA	NA	NA	NA	NA	NA
111126	17464.69313	18606.39905	2	26	4	13	3.9	44	15	26	7	102	114	0.67	2.9	4.77	28	59	168	273	3	3.7	138	0.2	8.7	151	6.8	97	5.5	27.9	NA	NA	2	5.27	NA	NA	2	2	2	2	6.6	85	7.76	NA	NA	NA	1.158
111127	29594.11237	31464.90137	2	13	3	9	4.3	93	15	25	9	103	94	0.69	2.7	5.44	8	104	134	280	3.7	3.6	141	0.5	9.4	143	7	114	4.4	25	NA	NA	2	NA	NA	NA	NA	NA	NA	NA	15.8	179	8.83	NA	NA	NA	0.286
111128	11434.40502	12897.67462	2	1	3	NA	NA	NA	NA	NA	NA	NA	NA	NA	NA	NA	NA	NA	NA	NA	NA	NA	NA	NA	NA	NA	NA	NA	NA	NA	NA	NA	2	NA	NA	NA	NA	NA	NA	NA	NA	NA	NA	NA	NA	NA	NA
111129	23541.81866	25012.68115	1	18	3	NA	NA	NA	NA	NA	NA	NA	NA	NA	NA	NA	NA	NA	NA	NA	NA	NA	NA	NA	NA	NA	NA	NA	NA	15.6	NA	NA	2	NA	NA	NA	NA	2	NA	NA	NA	NA	NA	NA	NA	NA	NA
111130	44405.58783	48891.20709	1	34	3	16	4	90	19	24	11	104	98	0.71	3	5.5	16	64	157	281	3	4.2	141	0.4	9.2	214	7	87	4.1	32.5	NA	NA	2	5.66	NA	NA	2	2	2	2	5.2	115	4.52	NA	NA	NA	0.491
111131	10809.9433	11437.66569	2	17	4	19	3.8	51	13	23	6	108	152	0.71	3.3	4.88	30	101	122	286	3.9	4.1	145	0.4	9.1	104	7.1	81	5.3	43	NA	NA	2	NA	NA	NA	NA	1	NA	NA	19.1	330	5.79	NA	NA	NA	0.33
111132	4081.986677	4701.669744	1	2	2	NA	NA	NA	NA	NA	NA	NA	NA	NA	NA	NA	NA	NA	NA	NA	NA	NA	NA	NA	NA	NA	NA	NA	NA	16.7	NA	NA	2	NA	NA	NA	NA	NA	NA	NA	NA	NA	NA	NA	NA	NA	NA
111133	13776.21101	14355.01682	2	48	4	9	3.7	71	16	25	7	103	101	0.81	3.3	4.22	16	48	153	278	4	3.9	141	0.3	9.2	198	7	174	4.7	30.3	NA	1	2	NA	NA	NA	2	2	2	2	1.8	59	3.05	0.08	0.56	1.72	0.379
111134	60369.79775	67942.11123	1	27	3	NA	NA	NA	NA	NA	NA	NA	NA	NA	NA	NA	NA	NA	NA	NA	NA	NA	NA	NA	NA	NA	NA	NA	NA	44.2	NA	NA	2	NA	NA	NA	2	1	1	2	11.6	181	6.41	NA	NA	NA	1.306
111135	21705.14522	23804.81542	1	38	1	NA	NA	NA	NA	NA	NA	NA	NA	NA	NA	NA	NA	NA	NA	NA	NA	NA	NA	NA	NA	NA	NA	NA	NA	27.4	NA	NA	2	NA	NA	NA	2	1	1	2	13	187	6.95	NA	NA	NA	0.429
111136	9703.282254	11615.21497	1	80	3	12	3.9	45	17	24	15	102	64	0.79	2.6	5.66	22	132	174	282	3.2	4.3	141	1.6	9.1	168	6.5	57	3.8	22.3	0	2	2	6.05	2	9	2	2	2	2	13.3	185	7.19	0.78	1.21	7.83	0.324
111137	10846.55239	12527.84894	1	2	1	NA	NA	NA	NA	NA	NA	NA	NA	NA	NA	NA	NA	NA	NA	NA	NA	NA	NA	NA	NA	NA	NA	NA	NA	NA	NA	NA	2	NA	NA	NA	NA	NA	NA	NA	NA	NA	NA	NA	NA	NA	NA
111138	18400.51435	20760.33385	2	57	3	22	3.7	92	18	23	19	93	68	0.9	3.6	9.94	28	96	166	277	3.6	3.7	135	0.4	9.3	208	7.3	167	8	74.8	NA	2	1	10.5	2	2	2	1	2	2	390	115	339.13	NA	NA	NA	0.724
111139	11419.55929	11920.74063	1	48	5	21	4.1	62	18	21	13	102	104	0.9	2.7	5.11	21	113	92	279	2.8	3.9	140	0.6	9	127	6.8	132	7.8	23.7	NA	2	2	5.55	NA	NA	2	2	2	2	7	101	6.93	1.18	0.56	40.65	0.426
111140	5742.912268	7027.346896	2	80	3	14	4.2	73	22	24	25	98	180	1.34	2.8	5.11	23	81	213	282	3.8	4.2	139	0.3	9.4	189	7	155	8.6	33.6	1	1	2	NA	1	2	1	2	2	9	7.5	43	17.44	NA	NA	NA	0.965
111141	51182.67329	55639.83923	1	16	3	24	4.7	111	21	25	14	102	364	0.77	2.3	4.44	12	66	216	281	3.8	4.5	141	0.3	9.3	154	7	133	6.2	34.3	NA	NA	2	NA	NA	NA	NA	1	NA	NA	6.8	193	3.52	NA	NA	NA	0.879
111142	9067.146729	11209.13907	2	3	5	NA	NA	NA	NA	NA	NA	NA	NA	NA	NA	NA	NA	NA	NA	NA	NA	NA	NA	NA	NA	NA	NA	NA	NA	15.9	NA	NA	2	NA	NA	NA	NA	NA	NA	NA	14.1	25	56.4	0.08	0.56	20.64	NA
111143	6616.485062	7461.931238	1	80	3	12	3.6	78	19	24	11	94	105	0.76	2.6	5	15	72	134	265	3.7	4	133	0.7	8.8	184	6.2	87	4	26	1	2	2	5.33	2	2	2	2	2	2	NA	NA	NA	NA	NA	NA	NA
111144	20006.33359	22523.56695	1	80	3	28	3.7	140	19	26	63	91	46	2.74	3.8	12.82	93	87	158	294	3.9	4	134	0.3	9.5	227	7.5	146	9	29	1	2	1	NA	2	2	2	2	2	1	72	57	126.32	NA	NA	NA	0.417
111145	25235.47086	25824.55197	1	46	1	20	4.1	59	20	24	20	97	188	1.01	3.3	5	23	162	141	276	3	4	137	0.4	9.4	272	7.4	115	4	27	NA	2	2	5.27	NA	NA	2	1	2	2	2	60	3.33	NA	NA	NA	0.756
111146	15071.46523	17097.12305	1	5	3	NA	NA	NA	NA	NA	NA	NA	NA	NA	NA	NA	NA	NA	NA	NA	NA	NA	NA	NA	NA	NA	NA	NA	NA	17.3	NA	NA	2	NA	NA	NA	NA	NA	NA	NA	11.1	33	33.64	0.08	0.56	1.96	NA
111147	6380.760905	7365.733788	1	11	5	NA	NA	NA	NA	NA	NA	NA	NA	NA	NA	NA	NA	NA	NA	NA	NA	NA	NA	NA	NA	NA	NA	NA	NA	19.9	NA	NA	2	NA	NA	NA	NA	NA	NA	NA	1.3	20	6.5	0.08	0.56	3	2.786
111148	11193.72567	0	2	62	4	NA	NA	NA	NA	NA	NA	NA	NA	NA	NA	NA	NA	NA	NA	NA	NA	NA	NA	NA	NA	NA	NA	NA	NA	NA	NA	2	2	NA	2	2	2	2	2	2	NA	NA	NA	NA	NA	NA	NA
111149	13686.61464	15222.80645	2	43	4	11	3.5	67	20	27	10	101	391	0.69	3.5	5	14	20	176	271	3.4	4	136	0.2	8.8	122	7	47	3.3	29.3	NA	2	2	NA	NA	NA	2	2	2	2	3.6	36	10	NA	NA	NA	2.788
111150	18894.1022	20490.07854	1	9	3	NA	NA	NA	NA	NA	NA	NA	NA	NA	NA	NA	NA	NA	NA	NA	NA	NA	NA	NA	NA	NA	NA	NA	NA	39.6	NA	NA	2	NA	NA	NA	NA	NA	NA	NA	2.9	52	5.58	NA	NA	NA	NA
111151	15646.56507	17806.24395	1	14	3	11	4	244	24	25	15	103	244	0.52	2.3	6.44	12	57	235	276	5	4.1	137	0.2	9.1	132	6.3	164	2.5	17.8	NA	NA	2	NA	NA	NA	NA	NA	NA	NA	4.2	76	5.53	0.94	0.56	4.66	NA
111152	24407.53849	26116.68841	2	31	4	14	3.8	59	15	27	8	105	238	0.63	3.3	4.94	8	123	213	287	3.3	3.5	145	0.4	8.7	152	7.1	77	4.8	53.2	NA	NA	2	NA	NA	NA	1	1	2	2	72	447	16.11	0.91	1.5	13.69	0.149
111153	18830.93252	19951.77867	2	32	4	NA	NA	NA	NA	NA	NA	NA	NA	NA	NA	NA	NA	NA	NA	NA	NA	NA	NA	NA	NA	NA	NA	NA	NA	37.2	NA	NA	2	NA	NA	NA	2	2	2	2	2.7	140	1.93	0.08	0.56	11.88	1.711
111154	10253.90611	11172.20961	2	26	4	8	3.9	48	17	22	9	102	80	0.9	2.8	3.83	11	71	120	271	3.8	3.9	137	0.2	9.1	150	6.7	187	5	33.1	NA	NA	2	NA	NA	NA	2	1	2	2	3.8	99	3.84	0.08	0.56	2.99	1.308
111155	7406.349321	7658.713301	2	45	4	NA	NA	NA	NA	NA	NA	NA	NA	NA	NA	NA	NA	NA	NA	NA	NA	NA	NA	NA	NA	NA	NA	NA	NA	40.2	NA	2	2	NA	NA	NA	2	2	2	2	171.5	207	82.85	0.08	0.56	10.2	0.469
111156	9758.586003	11650.78148	1	6	5	NA	NA	NA	NA	NA	NA	NA	NA	NA	NA	NA	NA	NA	NA	NA	NA	NA	NA	NA	NA	NA	NA	NA	NA	14.7	NA	NA	2	NA	NA	NA	NA	NA	NA	NA	5.2	27	19.26	NA	NA	NA	NA
111157	37196.42147	42357.40181	1	6	3	NA	NA	NA	NA	NA	NA	NA	NA	NA	NA	NA	NA	NA	NA	NA	NA	NA	NA	NA	NA	NA	NA	NA	NA	18.1	NA	NA	2	NA	NA	NA	NA	NA	NA	NA	51.1	95	53.79	NA	NA	NA	0.013
111158	13261.18015	18611.7791	2	8	5	NA	NA	NA	NA	NA	NA	NA	NA	NA	NA	NA	NA	NA	NA	NA	NA	NA	NA	NA	NA	NA	NA	NA	NA	16.1	NA	NA	2	NA	NA	NA	NA	NA	NA	NA	7.2	81	8.89	NA	NA	NA	0.164
111159	6868.153661	7306.150465	2	60	4	14	4.3	96	15	27	9	98	131	0.49	3.1	9.21	37	60	152	280	3.4	3.5	139	0.3	9.7	245	7.4	138	4.2	27.9	NA	2	1	NA	2	2	2	2	2	2	35.7	48	74.38	NA	NA	NA	1.674
111160	16346.80587	17001.25156	1	49	4	22	3.6	66	18	24	31	101	285	1.47	3.2	7.55	37	74	226	284	4.2	3.8	138	0.3	9.3	193	6.8	156	8.1	42.1	NA	1	1	8.05	NA	NA	2	1	2	2	65	124	52.42	NA	NA	NA	0.697
111161	4226.043064	4572.380953	2	19	5	9	3.8	80	18	25	7	100	148	0.69	3.8	5.11	19	126	NA	271	3.6	3.4	137	0.4	9.3	196	7.6	66	3.9	20.6	NA	NA	2	NA	NA	NA	NA	2	NA	NA	23.6	134	17.61	0.08	0.56	3.05	0.665
111162	9501.069836	10650.56061	2	43	4	4	3.6	51	10	24	12	104	121	0.69	3	5.33	11	83	154	277	3.8	4	139	0.5	8.9	146	6.6	118	3.6	23.6	NA	1	2	NA	NA	NA	2	2	2	2	117.9	260	45.35	NA	NA	NA	0.429
111163	50358.65892	58628.91437	1	22	3	17	3.8	114	17	24	9	103	132	0.81	2.9	5	33	84	129	283	3.3	4.2	143	0.4	9.4	123	6.7	158	4.9	30.1	NA	NA	2	5.44	NA	NA	2	1	2	2	8.4	106	7.92	0.08	0.56	1.59	0.167
111164	15771.14339	16859.07592	1	64	1	35	4.2	78	27	28	10	99	100	0.92	3.2	5.5	84	141	161	280	3.4	4.2	141	0.7	9.1	230	7.4	98	5.2	29.9	1	1	2	5.66	2	2	2	1	2	2	28.7	152	18.88	NA	NA	NA	0.944
111165	92389.79323	91785.47197	1	40	3	13	4.4	87	22	23	16	98	133	1.09	2.6	5.38	18	50	146	275	3.3	3.5	137	0.8	9.2	223	7	321	5.3	25.5	NA	1	2	5.88	NA	NA	2	1	1	2	18.6	347	5.36	NA	NA	NA	0.327
111166	27787.99491	0	1	20	5	NA	NA	NA	NA	NA	NA	NA	NA	NA	NA	NA	NA	NA	NA	NA	NA	NA	NA	NA	NA	NA	NA	NA	NA	NA	NA	NA	2	NA	NA	NA	2	2	2	2	NA	NA	NA	NA	NA	NA	NA
111167	11269.72709	11852.84834	1	16	5	19	4.1	123	34	28	14	101	438	0.95	2.7	4.83	7	157	147	281	4.2	4.5	141	0.9	9.6	123	6.8	51	7.5	21.5	NA	NA	2	5.22	NA	NA	NA	2	NA	NA	458	183	250.27	0.08	0.56	32.4	0.411
111168	52111.9894	60074.86634	2	44	3	8	4	61	12	26	8	101	33	0.95	2.4	5	17	108	121	279	3.2	3.7	141	0.7	9.2	199	6.4	100	3.6	19.1	NA	1	2	5.61	NA	NA	2	2	1	2	5.8	38	15.26	NA	NA	NA	1.109
111169	15190.5621	16518.49368	1	26	4	NA	NA	NA	NA	NA	NA	NA	NA	NA	NA	NA	NA	NA	NA	NA	NA	NA	NA	NA	NA	NA	NA	NA	NA	44.4	NA	NA	2	NA	NA	NA	2	1	2	2	8.4	219	3.84	0.08	0.56	2.21	NA
111170	16984.18062	17826.15433	1	10	2	NA	NA	NA	NA	NA	NA	NA	NA	NA	NA	NA	NA	NA	NA	NA	NA	NA	NA	NA	NA	NA	NA	NA	NA	21.7	NA	NA	2	NA	NA	NA	NA	NA	NA	NA	9.5	47	20.21	NA	NA	NA	NA
111171	80932.12227	83598.40018	2	35	3	57	4.5	62	67	29	12	97	1385	1.04	3	5.88	53	47	183	280	3.5	3.9	140	0.2	9.7	258	7.5	79	4.8	26.3	NA	NA	2	NA	NA	NA	2	2	1	1	3.8	38	10	0.08	0.56	3.84	1.207
111172	19718.49088	20371.87139	1	14	3	12	4.3	338	17	24	12	104	233	0.8	2.9	5.77	17	51	179	287	4.6	4.4	144	0.2	9.3	168	7.2	59	6.1	17.6	NA	NA	2	6.27	NA	NA	NA	NA	NA	NA	6.9	137	5.04	0.08	0.56	2.36	NA
111173	57235.40829	65544.68677	2	58	3	38	4.9	74	37	27	15	90	93	0.67	2.2	4.94	47	123	184	259	3.7	4.5	129	0.7	10.1	267	7.1	87	5.2	20	0	2	2	NA	2	2	2	2	2	2	1.1	21	5.24	NA	NA	NA	2.091
111174	10952.92715	12972.79267	2	2	3	NA	NA	NA	NA	NA	NA	NA	NA	NA	NA	NA	NA	NA	NA	NA	NA	NA	NA	NA	NA	NA	NA	NA	NA	14.6	NA	NA	2	NA	NA	NA	NA	NA	NA	NA	NA	NA	NA	NA	NA	NA	NA
111175	35182.79835	37750.53373	2	46	2	19	3.8	84	14	22	14	99	45	0.48	3.6	7.77	20	65	127	278	3.3	3.8	138	0.3	9.2	232	7.4	117	5.4	29.1	NA	2	1	8.38	NA	NA	2	1	2	2	11	82	13.41	NA	NA	NA	0.697
111176	29106.42638	0	2	51	4	NA	NA	NA	NA	NA	NA	NA	NA	NA	NA	NA	NA	NA	NA	NA	NA	NA	NA	NA	NA	NA	NA	NA	NA	NA	NA	1	2	NA	2	1	2	1	2	2	NA	NA	NA	NA	NA	NA	NA
111177	6091.323497	6332.114227	2	62	2	NA	4	NA	NA	NA	NA	96	NA	NA	NA	NA	NA	NA	NA	NA	NA	3.5	138	NA	NA	NA	NA	NA	NA	26.6	NA	1	2	5	1	2	2	2	2	2	19.6	38	51.58	NA	NA	NA	1.959
111178	53582.19664	57547.99262	2	74	3	13	3.9	87	16	24	11	103	52	1.07	2.4	5.05	19	65	171	280	3.6	4.4	141	0.3	9.3	133	6.3	175	5.3	31.2	0	2	2	NA	2	2	2	1	2	1	4.6	72	6.39	NA	NA	NA	0.751
111179	20817.5489	23901.30852	2	7	3	NA	NA	NA	NA	NA	NA	NA	NA	NA	NA	NA	NA	NA	NA	NA	NA	NA	NA	NA	NA	NA	NA	NA	NA	16.7	NA	NA	2	NA	NA	NA	NA	NA	NA	NA	3.8	37	10.27	NA	NA	NA	NA
111180	4838.753855	4996.533871	2	10	1	NA	NA	NA	NA	NA	NA	NA	NA	NA	NA	NA	NA	NA	NA	NA	NA	NA	NA	NA	NA	NA	NA	NA	NA	18.5	NA	NA	2	NA	NA	NA	NA	NA	NA	NA	NA	NA	NA	NA	NA	NA	NA
111181	22282.22153	22124.98368	1	18	4	13	4.4	111	27	28	19	101	672	1.08	3.4	4.27	8	105	200	280	4.9	4.5	140	0.4	9.6	150	7.8	116	7	24.5	NA	NA	2	NA	NA	NA	NA	2	NA	NA	12.4	188	6.6	NA	NA	NA	0.729
111182	16432.09841	18451.14704	1	8	3	NA	NA	NA	NA	NA	NA	NA	NA	NA	NA	NA	NA	NA	NA	NA	NA	NA	NA	NA	NA	NA	NA	NA	NA	25.8	NA	NA	2	NA	NA	NA	NA	NA	NA	NA	16.2	109	14.86	NA	NA	NA	NA
111183	25599.53871	24655.5737	2	55	1	41	3.7	59	23	26	10	100	68	0.67	3.5	5.33	21	78	161	276	3.6	4	139	0.3	9	199	7.2	81	5	23.3	1	2	2	5.77	2	2	2	2	2	2	7.4	93	7.96	NA	NA	NA	0.58
111184	5571.892465	5955.874956	1	16	4	11	4	109	13	25	11	103	187	1.1	2.9	5.05	19	56	137	282	3.3	4.2	142	0.4	9.4	161	6.9	41	5.2	24	NA	NA	2	NA	NA	NA	NA	2	NA	NA	4.7	211	2.23	0.67	0.56	3.33	0.335
111185	11051.90609	11444.11476	1	69	2	12	4.2	90	16	22	19	104	108	1.06	3	5.22	18	131	158	285	2.8	4.2	142	0.7	9	225	7.2	71	6.9	29.2	1	2	2	5.61	2	2	2	2	2	2	16.2	112	14.46	NA	NA	NA	0.704
111186	16243.21353	18359.27272	2	4	4	NA	NA	NA	NA	NA	NA	NA	NA	NA	NA	NA	NA	NA	NA	NA	NA	NA	NA	NA	NA	NA	NA	NA	NA	14.8	NA	NA	2	NA	NA	NA	NA	NA	NA	NA	18.1	40	45.25	0.08	0.56	3.1	NA
111187	8454.019609	10009.23913	2	1	5	NA	NA	NA	NA	NA	NA	NA	NA	NA	NA	NA	NA	NA	NA	NA	NA	NA	NA	NA	NA	NA	NA	NA	NA	NA	NA	NA	2	NA	NA	NA	NA	NA	NA	NA	NA	NA	NA	NA	NA	NA	NA
111188	44113.49153	47061.22991	1	74	3	18	3.9	90	21	27	20	100	109	1.01	2.8	4.16	18	65	156	281	3.2	4.1	140	0.4	9.7	176	6.7	226	6.3	31.7	1	2	2	NA	2	2	2	1	1	2	20.2	154	13.12	0.08	0.56	5.99	0.446
111189	32437.39773	34583.59233	2	36	2	15	3.5	60	18	29	18	101	119	0.88	3.3	4.33	49	31	134	280	4	4.5	140	0.1	9.1	182	6.8	155	4	28.9	NA	NA	2	4.66	NA	NA	2	2	2	2	3.1	117	2.65	0.95	0.96	11.98	0.889
111190	113924.7267	127996.7346	2	51	3	11	3.7	63	17	26	12	109	58	0.49	2.8	4.83	13	56	212	295	3	3.8	149	0.1	8.7	185	6.5	117	0.8	18.7	1	1	2	5.27	2	2	1	2	2	2	75.7	25	302.8	NA	NA	NA	2.174
111191	23866.19937	24336.66719	2	41	2	14	3.7	78	17	25	15	101	123	0.81	3.3	4.33	11	76	153	277	3.3	3.8	139	0.2	8.9	220	7	292	3.8	29.6	NA	2	2	NA	NA	NA	2	1	2	2	13.3	252	5.28	1.1	0.56	15.16	0.19
111192	5431.673153	5786.907952	1	54	5	37	4	107	18	26	17	100	241	1.01	2.7	5.5	75	122	122	281	3.7	3.8	140	0.4	9.1	243	6.7	384	6.7	26.2	0	2	2	5.88	2	2	2	2	2	2	6.8	78	8.72	NA	NA	NA	1.591
111193	6332.784456	6700.867154	1	6	2	NA	NA	NA	NA	NA	NA	NA	NA	NA	NA	NA	NA	NA	NA	NA	NA	NA	NA	NA	NA	NA	NA	NA	NA	16.4	NA	NA	2	NA	NA	NA	NA	NA	NA	NA	8.3	123	6.75	NA	NA	NA	NA
111194	4945.244309	5396.377506	2	63	1	18	4	114	21	27	15	104	61	0.82	2.6	5.83	18	70	186	288	3.6	4.4	144	0.4	8.9	198	6.6	168	5.2	28.8	1	2	2	5.94	2	2	2	1	2	2	10.3	131	7.86	NA	NA	NA	0.547
111195	11693.28589	13346.32551	1	6	5	NA	NA	NA	NA	NA	NA	NA	NA	NA	NA	NA	NA	NA	NA	NA	NA	NA	NA	NA	NA	NA	NA	NA	NA	18.3	NA	NA	2	NA	NA	NA	NA	NA	NA	NA	10.6	159	6.67	1.16	0.56	74.36	NA
111196	29079.40913	34809.09164	1	80	3	32	4.5	74	25	30	21	96	146	2	3	6	15	84	209	285	3.1	3.7	141	0.5	10	208	7.5	121	10.2	24.6	1	2	2	6.49	2	2	1	2	2	2	157.9	170	92.88	0.08	0.56	2.93	0.282
111197	6609.568279	7063.777013	2	27	4	6	3.7	72	16	26	9	103	125	0.98	3	4.39	37	131	161	281	3.4	3.7	142	0.2	8.9	182	6.7	50	3.9	22.8	NA	NA	2	4.83	NA	NA	2	2	2	2	7.1	106	6.7	NA	NA	NA	0.241
111198	11464.15283	13127.36269	2	56	4	11	3.5	82	14	21	13	104	171	0.56	3.9	5	18	58	156	285	2.8	3.3	143	0.2	9.3	169	7.4	218	4.9	49.1	1	2	2	5.33	1	2	2	1	1	2	21	237	8.86	NA	NA	NA	NA
111199	25983.20887	27808.11751	2	47	3	16	4.1	60	21	25	13	106	123	0.8	3.3	4.83	9	128	156	286	3.7	4	144	0.5	9.3	178	7.4	93	4.3	22.8	NA	2	2	5.27	NA	NA	2	2	2	2	4.7	170	2.76	1.35	0.56	37.04	0.898
111200	5306.638054	5818.099555	1	0	3	NA	NA	NA	NA	NA	NA	NA	NA	NA	NA	NA	NA	NA	NA	NA	NA	NA	NA	NA	NA	NA	NA	NA	NA	NA	NA	NA	NA	NA	NA	NA	NA	NA	NA	NA	NA	NA	NA	NA	NA	NA	NA
111201	5299.864363	5602.659604	1	50	4	38	4.2	79	40	24	9	98	229	0.96	3.5	4.39	154	149	163	273	3.3	4.5	138	0.4	9.4	274	7.7	178	8.6	25.8	1	1	2	4.83	2	2	2	2	2	2	15.9	241	6.6	NA	NA	NA	0.25
111202	104987.7967	104282.1673	1	49	3	22	4.2	64	17	26	21	93	138	1	2.4	16.26	19	119	173	282	3.4	4.2	134	0.6	9.5	209	6.6	189	5.2	28.7	NA	2	1	NA	NA	NA	2	1	2	2	1.3	27	4.81	0.08	0.56	1.59	4.564
111203	133346.0405	132704.2591	2	62	5	19	4.1	56	26	25	23	103	66	0.87	3	5.88	38	109	152	291	3.7	4.1	144	0.3	9.6	226	7.1	144	1.7	30.6	1	1	1	NA	2	2	2	1	2	1	3.9	96	4.06	NA	NA	NA	0.623
111204	45741.69506	49674.32203	2	32	2	24	3.7	43	20	28	10	99	55	0.47	3.3	3.77	8	89	144	273	4.2	3.7	138	0.2	9.3	173	7	113	2.5	22.7	NA	NA	2	NA	NA	NA	2	2	2	2	3.1	24	12.92	NA	NA	NA	1.143
111205	15642.87241	0	2	0	3	NA	NA	NA	NA	NA	NA	NA	NA	NA	NA	NA	NA	NA	NA	NA	NA	NA	NA	NA	NA	NA	NA	NA	NA	NA	NA	NA	NA	NA	NA	NA	NA	NA	NA	NA	NA	NA	NA	NA	NA	NA	NA
111206	14453.45435	14361.26544	1	61	2	12	4	78	13	25	22	102	54	1.21	2.9	4.83	27	123	118	286	2.9	4.5	142	0.8	9.7	198	6.9	105	8.6	25.5	0	2	2	5.11	2	2	2	2	2	2	5.7	116	4.91	NA	NA	NA	0.727
111207	3689.563713	4060.484539	1	77	1	64	4.1	76	39	23	17	104	158	1.54	2.8	6.61	44	97	146	288	3.1	4.1	143	2.4	8.9	186	6.9	183	7.4	30	0	1	1	6.94	2	2	1	1	2	2	35.9	299	12.01	NA	NA	NA	0.226
111208	9436.987667	10480.69667	2	36	5	16	3.9	78	20	24	11	102	175	0.73	2.9	4	10	53	152	277	4.5	3.9	140	0.2	8.6	148	6.8	88	4.6	25.1	NA	NA	3	NA	NA	NA	2	2	1	2	5.4	48	11.25	1.93	0.56	9.63	0.594
111209	96341.66317	94850.72386	2	31	3	16	3.5	90	15	23	10	102	134	0.73	3.4	5.55	22	61	172	280	2.9	4.1	141	0.2	8.5	154	6.9	127	5	52.1	NA	NA	2	5.94	NA	NA	2	1	2	2	10.7	142	7.54	NA	NA	NA	0.045
111210	10666.31528	11717.47451	2	71	1	19	4.2	82	20	28	22	100	96	0.61	3.3	5.94	17	101	167	283	4.1	4.2	140	0.3	9.8	212	7.5	167	5.3	36.1	1	2	3	NA	2	2	1	1	2	2	63.2	65	97.23	NA	NA	NA	0.206
111211	12003.96636	0	1	39	4	NA	NA	NA	NA	NA	NA	NA	NA	NA	NA	NA	NA	NA	NA	NA	NA	NA	NA	NA	NA	NA	NA	NA	NA	NA	NA	NA	2	NA	NA	NA	2	2	2	2	NA	NA	NA	NA	NA	NA	NA
111212	7372.444423	8005.917037	2	77	2	NA	NA	NA	NA	NA	NA	NA	NA	NA	NA	NA	NA	NA	NA	NA	NA	NA	NA	NA	NA	NA	NA	NA	NA	NA	NA	2	1	NA	1	2	2	2	2	2	NA	NA	NA	NA	NA	NA	NA
111213	10517.8316	10702.08426	1	41	5	NA	NA	NA	NA	NA	NA	NA	NA	NA	NA	NA	NA	NA	NA	NA	NA	NA	NA	NA	NA	NA	NA	NA	NA	22.6	NA	2	2	NA	NA	NA	2	2	2	2	5.2	115	4.52	NA	NA	NA	0.429
111214	1855.656858	0	2	0	2	NA	NA	NA	NA	NA	NA	NA	NA	NA	NA	NA	NA	NA	NA	NA	NA	NA	NA	NA	NA	NA	NA	NA	NA	NA	NA	NA	NA	NA	NA	NA	NA	NA	NA	NA	NA	NA	NA	NA	NA	NA	NA
111215	6454.750779	6932.999678	1	67	1	16	4.2	107	16	23	18	101	244	0.82	2.5	24.37	20	117	187	298	4.3	4.8	139	0.4	9.5	158	6.7	84	4.5	27.3	0	2	1	NA	2	2	1	2	2	2	2.8	46	6.09	NA	NA	NA	2.4
111216	13197.46773	13631.23843	1	76	4	23	4.4	84	32	29	11	100	330	1.41	3.3	8.72	42	93	255	284	4.1	4.1	141	0.6	9	122	7.7	97	4.8	27.1	1	1	1	9.16	2	2	2	2	2	2	46.8	149	31.41	NA	NA	NA	0.551
111217	45203.16699	50874.0575	1	10	3	NA	NA	NA	NA	NA	NA	NA	NA	NA	NA	NA	NA	NA	NA	NA	NA	NA	NA	NA	NA	NA	NA	NA	NA	24.4	NA	NA	2	NA	NA	NA	NA	NA	NA	NA	7.1	110	6.45	NA	NA	NA	0.702
111218	79196.68956	0	1	55	3	NA	NA	NA	NA	NA	NA	NA	NA	NA	NA	NA	NA	NA	NA	NA	NA	NA	NA	NA	NA	NA	NA	NA	NA	NA	NA	2	2	NA	2	2	2	1	2	2	NA	NA	NA	NA	NA	NA	NA
111219	13502.2968	14108.33799	2	31	1	16	4.5	86	17	25	10	101	151	0.66	2.3	4.72	10	59	146	280	4.3	4	141	0.5	9.4	168	6.8	52	4	24.5	NA	NA	2	NA	NA	NA	2	2	2	2	12.3	85	14.47	NA	NA	NA	1.575
111220	24290.09009	27934.3431	1	24	3	23	4.1	91	19	23	11	104	54	0.87	2.9	4.77	40	114	153	282	4.6	4.3	142	0.5	9.6	174	7	89	5.7	32.4	NA	NA	2	5.44	NA	NA	2	1	2	2	5	197	2.54	0.49	0.56	5.97	18.071
111221	14488.12623	17572.17639	1	80	3	23	4.4	64	22	27	12	103	134	1.01	2.6	5.61	35	96	147	281	2.6	4.4	141	0.4	9.4	150	7	136	5.5	28.3	1	1	2	5.88	2	2	2	2	2	2	23.5	170	13.82	NA	NA	NA	0.373
111222	13816.85299	13837.0819	2	53	2	16	4.2	88	18	23	10	97	90	0.74	2.9	5.33	18	71	144	269	3.4	4.1	135	0.4	9	157	7.1	89	4.2	26.6	1	2	2	NA	2	2	2	2	2	2	2.4	35	6.86	0.08	0.56	2.76	0.858
111223	5879.170763	6215.572619	2	10	2	NA	NA	NA	NA	NA	NA	NA	NA	NA	NA	NA	NA	NA	NA	NA	NA	NA	NA	NA	NA	NA	NA	NA	NA	21.2	NA	NA	2	NA	NA	NA	NA	NA	NA	NA	9.9	115	8.61	NA	NA	NA	NA
111224	5619.7366	5959.071229	2	25	4	16	3.3	90	14	24	5	108	100	0.72	3.4	4.72	13	90	233	281	3.1	4.3	143	0.3	9.1	136	6.7	46	4.3	42.5	NA	NA	2	5.33	NA	NA	2	1	2	2	11.3	274	4.12	NA	NA	NA	0.348
111225	3666.863534	4272.243589	2	4	5	NA	NA	NA	NA	NA	NA	NA	NA	NA	NA	NA	NA	NA	NA	NA	NA	NA	NA	NA	NA	NA	NA	NA	NA	14.9	NA	NA	2	NA	NA	NA	NA	NA	NA	NA	11.6	129	8.99	0.08	0.56	NA	NA
111226	6485.235119	6855.09269	1	80	1	16	3.8	72	29	27	12	104	125	0.66	2.9	5.61	32	50	179	289	2.5	3.7	145	0.5	9.2	164	6.7	194	5.7	29.9	0	2	2	NA	2	2	1	2	2	2	1508	105	1436.19	NA	NA	NA	0.23
111227	12778.25129	15062.2087	2	2	1	NA	NA	NA	NA	NA	NA	NA	NA	NA	NA	NA	NA	NA	NA	NA	NA	NA	NA	NA	NA	NA	NA	NA	NA	16	NA	NA	2	NA	NA	NA	NA	NA	NA	NA	NA	NA	NA	NA	NA	NA	NA
111228	16082.58076	17026.74583	1	40	4	13	3.9	107	18	28	11	105	240	0.89	3.4	4.72	21	62	154	293	3.5	5	148	0.5	9.6	179	7.3	81	7.8	33.4	NA	1	2	NA	NA	NA	2	2	2	2	11.9	289	4.12	NA	NA	NA	NA
111229	53441.12809	58544.80892	1	64	3	24	3.9	76	20	27	10	105	114	1.07	2.7	4.77	25	136	190	287	3.7	5.6	145	0.7	9.1	131	6.6	166	7.1	29.3	1	2	2	NA	2	2	2	2	2	2	8.6	171	5.03	0.08	0.56	5.22	0.523
111230	9075.42068	10234.18986	2	5	1	NA	NA	NA	NA	NA	NA	NA	NA	NA	NA	NA	NA	NA	NA	NA	NA	NA	NA	NA	NA	NA	NA	NA	NA	16.3	NA	NA	2	NA	NA	NA	NA	NA	NA	NA	6.3	79	7.97	0.08	0.56	2.46	NA
111231	4488.338952	0	1	61	4	NA	NA	NA	NA	NA	NA	NA	NA	NA	NA	NA	NA	NA	NA	NA	NA	NA	NA	NA	NA	NA	NA	NA	NA	NA	NA	2	2	NA	2	2	2	2	2	2	NA	NA	NA	NA	NA	NA	NA
111232	12945.50416	14542.14507	2	59	2	15	3.9	60	19	25	10	103	139	0.72	3.6	5.5	18	88	180	280	3.5	4	141	0.3	9.2	298	7.5	94	3.5	24.3	0	2	2	5.77	2	2	2	2	2	2	6.4	82	7.8	NA	NA	NA	0.828
111233	22460.26644	24286.00145	1	32	5	23	4.1	69	21	28	14	101	187	0.94	3.2	5.16	20	63	122	278	3.6	4.1	139	0.4	9.2	175	7.3	160	6.9	32.6	NA	NA	2	5.5	NA	NA	2	1	2	2	10.7	336	3.18	NA	NA	NA	0.52
111234	23948.15399	32052.13082	2	80	3	13	3.9	72	17	26	21	97	60	0.94	2.6	6.27	19	75	123	272	3.8	4.4	134	0.3	9.1	148	6.5	164	5.2	30.2	1	2	2	NA	2	2	1	2	2	2	30.5	123	24.8	NA	NA	NA	0.369
111235	9139.978595	9558.65663	2	45	5	15	4.4	36	14	27	8	100	55	0.39	2.6	4.72	15	136	112	279	3.7	4.1	141	0.8	9.3	219	7	125	3.4	21.2	NA	2	2	NA	NA	NA	2	2	2	2	9	44	20.45	NA	NA	NA	NA
111236	8632.380175	9054.337754	1	40	4	37	4.4	65	31	24	8	101	779	1.07	2.8	4.39	47	88	173	277	4.1	4	140	0.2	9.9	191	7.2	302	6.4	30.7	NA	1	2	NA	NA	NA	2	2	2	2	8.6	173	4.97	0.08	0.56	4.34	1.256
111237	7997.971307	11128.30513	2	9	4	NA	NA	NA	NA	NA	NA	NA	NA	NA	NA	NA	NA	NA	NA	NA	NA	NA	NA	NA	NA	NA	NA	NA	NA	22.4	NA	NA	2	NA	NA	NA	NA	NA	NA	NA	58.5	59	99.15	NA	NA	NA	NA
111238	10862.74621	11711.26644	1	38	1	89	4.8	114	85	24	13	100	1372	0.84	3.5	5.72	112	181	194	280	3.1	3.8	140	0.7	9.4	282	8.3	147	6.6	27.6	NA	NA	2	6.38	NA	NA	2	2	2	2	9.6	191	5.03	NA	NA	NA	0.341
111239	5640.383902	6085.234328	2	6	1	NA	NA	NA	NA	NA	NA	NA	NA	NA	NA	NA	NA	NA	NA	NA	NA	NA	NA	NA	NA	NA	NA	NA	NA	15.3	NA	NA	2	NA	NA	NA	NA	NA	NA	NA	4.2	39	10.77	NA	NA	2.1	NA
111240	4439.95767	4592.972095	1	61	2	33	4.5	86	22	27	14	96	178	0.86	3.2	5.16	51	66	166	278	4.4	3.5	139	0.7	9.9	187	7.7	186	7.2	28.2	0	2	2	NA	2	2	2	2	2	2	6.9	89	7.75	0.08	0.56	69.03	0.808
111241	11713.57921	13359.73886	1	12	5	11	4.7	361	20	18	18	102	186	0.84	2.8	6.11	10	92	169	289	4.8	3.9	144	0.9	9.8	123	7.5	62	5.7	22.1	NA	NA	2	NA	NA	NA	NA	NA	NA	NA	83.6	356	23.48	0.08	0.56	11.39	0.355
111242	15842.42661	16686.80571	1	20	4	8	4	69	17	28	14	102	211	1.08	2.9	5.11	15	76	169	287	3.7	4.3	144	0.3	9.2	149	6.9	84	4.9	20.4	NA	NA	2	5.5	NA	NA	2	2	2	2	9.3	273	3.41	1.24	0.56	9.3	NA
111243	13109.30752	15783.55195	2	2	3	NA	NA	NA	NA	NA	NA	NA	NA	NA	NA	NA	NA	NA	NA	NA	NA	NA	NA	NA	NA	NA	NA	NA	NA	15.2	NA	NA	2	NA	NA	NA	NA	NA	NA	NA	NA	NA	NA	NA	NA	NA	NA
111244	100959.2659	104830.9354	2	22	3	19	4	97	23	24	11	100	144	0.76	3.8	4.39	14	52	154	272	2.8	4.2	137	0.3	9.4	195	7.8	176	4.7	32.5	NA	NA	2	NA	NA	NA	2	1	2	2	6.1	67	9.1	NA	NA	NA	1.078
111245	17887.92936	19708.19016	2	75	3	14	4.1	83	15	32	14	99	66	0.66	2.7	5.33	16	105	144	278	3.5	3.9	139	0.5	9.4	222	6.8	321	7.5	29.7	0	1	2	NA	1	2	2	2	2	2	16.1	135	11.93	NA	NA	NA	0.265
111246	6182.929248	6632.977112	1	61	4	7	3.4	106	10	26	11	104	96	1.52	3.5	8.27	17	68	169	285	3.3	4.7	142	0.3	10	128	6.9	204	7.4	35	0	2	1	NA	2	2	2	1	2	2	15	48	31.25	NA	NA	NA	NA
111247	10878.6425	11869.71217	1	71	3	18	4.2	86	26	29	14	95	165	0.73	2.6	6.49	9	91	167	277	3.1	3.7	138	0.3	9.3	144	6.8	85	6.7	19.1	1	2	2	6.99	2	2	2	2	2	2	64.7	108	59.91	NA	NA	NA	0.391
111248	4571.229182	5056.520066	1	0	3	NA	NA	NA	NA	NA	NA	NA	NA	NA	NA	NA	NA	NA	NA	NA	NA	NA	NA	NA	NA	NA	NA	NA	NA	NA	NA	NA	NA	NA	NA	NA	NA	NA	NA	NA	NA	NA	NA	NA	NA	NA	NA
111249	10161.11007	10419.62101	1	18	4	9	4.3	46	14	25	10	102	127	0.97	2.5	4.72	10	73	124	280	4.1	3.9	141	0.4	9.4	150	6.8	47	4.9	21	NA	NA	2	NA	NA	NA	NA	2	NA	NA	0.5	15	3.33	0.08	0.56	0.3	3.16
111250	33792.3558	35413.78751	2	57	3	73	4.1	99	59	23	16	103	229	0.77	2.7	4.66	15	77	215	278	3.7	4.1	139	0.4	8.8	140	6.8	62	5.5	29.2	0	2	2	5	2	2	2	2	2	2	19.8	120	16.5	NA	NA	NA	0.256
111251	7025.619864	7193.683332	2	15	1	11	4.2	117	11	29	8	105	113	0.62	2.6	5.5	9	79	199	291	4.4	3.8	147	0.2	9.3	104	6.8	122	3.7	25.8	NA	NA	2	NA	NA	NA	NA	NA	NA	NA	3010	249	1208.84	NA	NA	NA	0.308
111252	9978.556402	11720.42247	1	1	3	NA	NA	NA	NA	NA	NA	NA	NA	NA	NA	NA	NA	NA	NA	NA	NA	NA	NA	NA	NA	NA	NA	NA	NA	NA	NA	NA	2	NA	NA	NA	NA	NA	NA	NA	NA	NA	NA	NA	NA	NA	NA
111253	4633.398392	4784.244333	1	71	4	18	3.9	81	17	27	13	102	169	1.31	3.1	5.27	21	96	178	287	3.5	4.5	144	0.5	9.4	126	7	64	3.8	27.9	1	2	1	NA	2	2	2	2	2	2	4.1	44	9.32	NA	NA	NA	0.611
111254	56996.63877	61789.9267	1	39	3	37	4.9	54	33	27	22	99	265	1.12	2.1	5.16	14	99	161	284	3.8	4.1	141	0.7	9.5	174	7	44	5.7	28	NA	NA	2	NA	NA	NA	2	1	2	2	0.8	29	2.76	0.08	0.56	6.82	1.692
111255	37672.88291	43120.29358	1	78	3	7	3.4	74	13	27	12	98	44	0.81	3	5.61	12	44	152	277	3.1	4.6	139	0.3	8.8	205	6.4	74	4.9	20.2	0	1	2	6.16	2	2	1	2	1	2	4.4	85	5.18	0.08	0.56	2.32	0.698
111256	8352.383033	8763.253338	2	63	4	19	4.2	72	21	28	16	101	151	1.08	3.3	6.49	22	51	225	285	3.8	3.8	142	0.3	9.3	143	7.5	80	4.9	26.1	0	2	1	6.99	2	2	2	2	2	2	11	63	17.46	0.08	0.56	6.79	0.121
111257	7119.959671	7507.23027	1	70	4	18	4	59	24	23	16	105	440	1.12	3.5	5.55	13	92	169	284	2.7	3.4	142	0.5	9.4	144	7.5	58	6.7	31.5	0	2	2	NA	2	2	2	2	2	2	52.8	345	15.3	NA	NA	NA	0.427
111258	13323.59951	15427.03045	1	2	5	NA	NA	NA	NA	NA	NA	NA	NA	NA	NA	NA	NA	NA	NA	NA	NA	NA	NA	NA	NA	NA	NA	NA	NA	NA	NA	NA	2	NA	NA	NA	NA	NA	NA	NA	NA	NA	NA	NA	NA	NA	NA
111259	22650.22363	24588.42864	1	11	1	NA	NA	NA	NA	NA	NA	NA	NA	NA	NA	NA	NA	NA	NA	NA	NA	NA	NA	NA	NA	NA	NA	NA	NA	17.7	NA	NA	2	NA	NA	NA	NA	NA	NA	NA	13.3	112	11.88	NA	NA	NA	0.624
111260	5765.271014	6516.332663	2	3	4	NA	NA	NA	NA	NA	NA	NA	NA	NA	NA	NA	NA	NA	NA	NA	NA	NA	NA	NA	NA	NA	NA	NA	NA	15	NA	NA	2	NA	NA	NA	NA	NA	NA	NA	11	17	64.71	0.08	0.56	5.08	NA
111261	15964.35291	17054.37641	2	14	1	NA	NA	NA	NA	NA	NA	NA	NA	NA	NA	NA	NA	NA	NA	NA	NA	NA	NA	NA	NA	NA	NA	NA	NA	22.9	NA	NA	2	NA	NA	NA	NA	NA	NA	NA	90.4	104	86.92	NA	NA	NA	0.407
[truncated: 13,561 more rows]
