# Supplementary material for: High cholesterol and low triglycerides are associated with total lumbar bone mineral density among adults aged 50 years and over: The NHANES 2017–2020
Source: Front Med (Lausanne). 2022 Aug 8;9:923730. doi: 10.3389/fmed.2022.923730 (PMC9393595; doi:10.3389/fmed.2022.923730)
Supplement: Supplementary file 4 [file Table_2.XLS]

SEQN	GENDER	AGE	RACE	MARITAL.STATUS	FULL.SAMPLE.INTERVIEW.WEIGHT	WTMECPRP	ALANINE.AMINOTRANSFERASE	ALBUMIN..REFRIGERATED.SERUM	ALKALINE.PHOSPHATASE..ALP...IU.L.	ASPARTATE.AMINOTRANSFERASE..AST...IU.L.	BICARBONATE..MMOL.L.	BLOOD.UREA.NITROGEN..MMOL.L.	CHLORIDE..MMOL.L.	CREATINE.PHOSPHOKINASE..CPK...IU.L.	CREATININE..REFRIGERATED.SERUM..UMOL.L.	GLOBULIN..G.L.	GLUCOSE..REFRIGERATED.SERUM..MMOL.L.	GAMMA.GLUTAMYL.TRANSFERASE..GGT...IU.L.	IRON..REFRIGERATED.SERUM..UMOL.L.	LACTATE.DEHYDROGENASE..LDH...IU.L.	OSMOLALITY..MMOL.KG.	PHOSPHORUS..MMOL.L.	POTASSIUM..MMOL.L.	SODIUM..MMOL.L.	TOTAL.BILIRUBIN..UMOL.L.	TOTAL.CALCIUM..MMOL.L.	CHOLESTEROL..REFRIGERATED.SERUM..MMOL.L.	TOTAL.PROTEIN..G.L.	TRIGLYCERIDES..REFRIG.SERUM..MMOL.L.	URIC.ACID..MG.DL.	TOTAL.SPINE.BMD	RATIO.OF.FAMILY.INCOME.TO.POVERTY.CS	RATIO.OF.FAMILY.INCOME.TO.POVERTY.CS.NEW	ASPARTATE.AMINOTRANSFERASE..AST...IU.L..NEW	CREATINE.PHOSPHOKINASE..CPK...IU.L..NEW	LACTATE.DEHYDROGENASE..LDH...IU.L..NEW	POTASSIUM..MMOL.L..NEW
112291	1	65	1	1	37592.3877	41714.18588	338	39	38	307	25	4.28	96	99	78.68	49	4.88	206	24	189	267	1.162	4	134	10.26	2.35	4.267	88	1.05	7.6	1.292	0	0	307	99	189	4
119265	2	64	4	1	13605.17805	14669.07744	213	39	144	182	23	3.57	98	124	45.08	41	7.94	369	16.1	204	272	1.13	3.6	135	15.39	2.4	2.819	80	1.253	3.3	0.793	2	2	182	124	204	3.6
117294	1	55	1	2	16740.05614	18156.33329	189	41	101	82	24	7.14	94	168	88.4	32	5.88	215	24.2	153	271	1.162	3.4	134	17.1	2.375	4.034	73	1.016	5.2	1.022	0	0	82	168	153	3.4
121962	1	54	3	1	16776.71294	17250.00151	127	40	114	128	27	3.57	101	112	79.56	36	5.33	414	17.2	172	280	1.227	4.1	141	10.26	2.3	5.767	76	1.298	6.7	0.93	0	0	128	112	172	4.1
120652	2	60	2	2	3890.090112	4067.034634	122	41	104	53	29	6.07	103	290	65.42	28	5.72	300	16.3	194	287	1.388	4.2	143	13.68	2.375	3.284	69	0.824	6.1	1.096	0	0	53	290	194	4.2
115969	2	56	2	2	17698.29382	18491.4696	117	43	127	75	28	2.5	101	682	58.34	28	5.16	205	19.9	251	283	0.904	3.3	143	6.84	2.35	6.362	71	1.163	6.2	1.133	2	2	75	682	251	3.3
121058	1	51	4	1	9961.235967	11103.16743	108	45	99	69	26	3.57	100	100	76.91	32	5.66	585	20.2	196	275	1.066	4.1	138	6.84	2.225	5.017	77	7.734	5.3	1.024	NA	3	69	100	196	4.1
117166	1	55	1	1	126854.5027	126750.7641	108	44	80	97	27	4.64	98	111	62.76	41	5	95	15.9	148	275	1.066	4.2	138	17.1	2.375	4.603	85	0.756	5.9	0.861	1	1	97	111	148	4.2
124812	2	62	4	1	9918.727262	10297.58516	97	37	110	75	26	3.93	97	137	40.66	37	5.33	79	18.6	234	275	0.904	3	138	6.84	2.225	5.663	74	1.344	5.3	1.051	2	2	75	137	234	3
123770	1	55	4	1	7858.846813	8972.981236	93	48	75	63	27	5	100	85	80.44	30	5.27	22	23.8	143	283	1.13	4.7	142	18.81	2.55	4.81	78	2.202	5.4	1.063	2	2	63	85	143	4.7
124101	2	58	1	1	171616.8606	188857.9666	87	37	135	40	25	7.14	102	69	67.18	32	4.44	60	11.6	197	283	1.453	4.4	141	3.42	2.25	5.793	69	1.818	3.9	1.094	2	2	40	69	197	4.4
124778	2	54	4	1	13324.28066	13922.13513	85	41	163	83	22	5	102	423	58.34	30	7.33	61	11.5	216	280	1.195	3.8	139	11.97	2.25	4.526	71	1.524	7.4	0.817	2	2	83	423	216	3.8
112718	1	59	1	1	87939.45811	93527.08771	82	47	64	60	20	6.78	102	96	53.92	27	8.44	253	13.4	183	281	1.292	4.4	138	6.84	2.275	4.215	74	1.998	4	1.283	NA	3	60	96	183	4.4
124592	1	68	2	1	7866.783211	8428.567548	78	31	81	99	28	3.93	104	592	83.98	44	4.61	123	17.6	233	282	1.13	4.5	142	22.23	2.125	7.344	75	1.073	5.4	1.118	1	1	99	592	233	4.5
109574	2	55	4	1	12235.52073	13420.40896	77	47	90	59	23	7.14	97	159	53.04	29	7.27	39	10.4	136	280	1.421	3.7	138	3.42	2.525	7.81	76	5.035	7.8	0.908	2	2	59	159	136	3.7
111250	2	57	1	2	33792.3558	35413.78751	73	41	99	59	23	5.71	103	229	68.07	27	4.66	15	13.8	215	278	1.195	4.1	139	6.84	2.2	3.62	68	0.7	5.5	1.074	0	0	59	229	215	4.1
111712	1	60	2	2	8058.529768	8637.348182	72	37	82	92	28	3.93	99	362	87.52	31	5.66	122	17	213	273	0.775	3.8	137	6.84	2.275	4.526	68	1.05	4.5	0.995	NA	3	92	362	213	3.8
116437	1	71	4	2	38702.3997	42109.82437	70	46	67	73	22	7.14	98	70	82.21	31	10.99	42	16.8	84	280	1.033	4.5	136	18.81	2.425	4.577	77	3.218	8.2	1.081	1	1	73	70	84	4.5
120478	1	60	4	1	8295.759157	8649.007736	70	42	65	44	23	7.14	100	97	79.56	33	4.88	23	21.5	175	283	1.292	3.7	141	6.84	2.375	5.379	75	1.4	8.8	1.093	2	2	44	97	175	3.7
109794	1	63	1	1	59682.82554	61023.07092	68	42	81	46	23	5	101	220	87.52	29	5.61	60	23.5	164	278	1.13	4.1	139	5.13	2.4	5.327	71	2.134	6.1	1.17	2	2	46	220	164	4.1
116956	2	50	3	1	10459.72069	10133.04123	66	47	107	30	26	4.28	99	42	55.69	31	15.6	29	13.3	106	293	1.292	4.2	142	10.26	2.55	5.456	78	1.964	3.9	1.113	0	0	30	42	106	4.2
116776	1	52	1	1	61033.35208	62130.81131	65	43	63	33	25	3.93	104	296	87.52	25	4.11	27	16.3	162	279	1.13	4.2	141	17.1	2.325	3.155	68	1.558	5.5	1.135	NA	3	33	296	162	4.2
111207	1	77	3	2	3689.563713	4060.484539	64	41	76	39	23	6.07	104	158	136.14	28	6.61	44	17.4	146	288	1.001	4.1	143	41.04	2.225	4.81	69	2.066	7.4	0.971	1	1	39	158	146	4.1
111668	1	52	1	1	68952.56474	74786.23348	64	40	56	40	27	6.43	90	94	82.21	28	6.11	38	17.2	154	267	1.259	4	132	13.68	2.325	5.637	68	2.303	7.6	1.186	2	2	40	94	154	4
117314	1	61	4	2	13664.38259	14752.18524	63	41	105	50	25	4.28	101	129	89.28	33	5.27	78	12.4	189	281	1.356	4.3	141	15.39	2.325	4.758	74	1.163	7	1.138	NA	3	50	129	189	4.3
112001	1	59	1	1	70519.66848	76485.92061	63	41	83	46	28	5.71	97	319	64.53	22	4.83	279	20.8	146	276	1.227	3.7	138	11.97	2.2	4.37	63	1.614	4.3	1.084	2	2	46	319	146	3.7
113446	1	57	2	2	14858.66378	16045.14776	62	29	133	37	25	6.43	104	65	69.84	47	6.33	63	14.1	131	290	1.033	3.6	144	3.42	2.4	4.448	76	1.106	4.4	0.882	0	0	37	65	131	3.6
120967	1	57	1	2	43015.43837	46394.63012	62	40	61	46	22	5	100	542	99.01	32	5.33	55	20.8	189	274	1.195	4.2	137	10.26	2.375	6.491	72	3.94	8.7	1.107	2	2	46	542	189	4.2
110306	2	53	2	1	6896.730897	7284.665839	62	35	155	83	26	4.28	100	71	62.76	51	7.72	282	13.6	150	276	1.324	4.3	137	6.84	2.325	3.207	86	0.835	4.9	1.033	0	0	83	71	150	4.3
113575	1	58	1	1	13693.37698	15347.46397	62	37	68	60	26	3.21	101	112	70.72	32	4.94	35	25.1	169	278	1.066	3.8	140	13.68	2.1	4.888	69	1.039	5.6	0.96	0	0	60	112	169	3.8
117045	2	57	1	1	22385.72956	24607.93301	62	37	65	50	27	5	102	54	62.76	29	5.27	66	22.9	173	282	1.324	4.7	141	23.94	2.25	4.474	66	1.739	6	1.14	2	2	50	54	173	4.7
118609	2	53	3	2	23924.62596	25052.83435	60	41	100	83	23	3.21	103	106	64.53	28	6.11	74	30.8	176	279	1.162	4.2	140	15.39	2.325	5.793	69	1.287	4.1	0.824	2	2	83	106	176	4.2
111494	1	58	1	2	14797.97239	14998.03722	60	40	72	41	24	7.5	95	48	106.08	30	16.21	44	17	175	286	1.421	4.2	136	15.39	2.475	4.008	70	2.258	5.5	0.963	0	0	41	48	175	4.2
110639	1	52	1	1	87045.61007	96750.65376	60	41	52	33	25	6.07	102	61	58.34	28	4.94	51	32.6	155	279	0.969	4.1	139	13.68	2.125	3.982	69	1.163	5.3	1.17	2	2	33	61	155	4.1
119688	2	51	4	1	17632.96112	19238.98363	59	43	170	51	27	5	101	161	60.11	35	5.11	165	24	200	281	1.13	3.7	141	3.42	2.475	7.189	78	2.416	5.5	1.072	0	0	51	161	200	3.7
114406	2	60	3	1	7623.814354	8080.124065	59	43	80	55	29	6.07	96	148	45.08	33	8.33	91	23.5	178	286	1.098	3.4	141	11.97	2.5	4.008	76	1.716	3.7	1.123	2	2	55	148	178	3.4
124224	1	50	4	2	23286.79818	23700.34927	58	37	136	35	25	4.28	98	82	43.32	32	12.32	137	27.8	148	284	1.001	3.8	139	20.52	2.125	3.698	69	0.858	3.8	1.302	0	0	35	82	148	3.8
122982	1	53	4	2	20078.8092	22540.58987	58	43	79	31	24	6.78	101	240	76.02	30	5.33	24	19.2	202	280	1.098	3.9	139	6.84	2.3	2.612	73	0.723	6.2	0.993	2	2	31	240	202	3.9
121976	1	50	4	1	11080.19078	11460.52311	58	41	91	38	23	8.57	101	165	70.72	30	6.27	146	10.9	175	282	1.292	3.6	139	5.13	2.375	5.663	71	3.285	8.2	1.047	NA	3	38	165	175	3.6
116757	1	50	3	1	13777.90486	14089.71121	58	40	98	37	25	6.43	104	253	71.6	31	6.16	31	22.9	169	289	0.84	4.3	144	8.55	2.175	4.138	71	1.389	5.1	0.963	2	2	37	253	169	4.3
114023	1	63	1	1	45260.20465	47764.58491	58	45	80	47	28	6.78	98	333	86.63	32	5.22	41	16.8	169	274	1.292	3.9	136	10.26	2.325	5.25	77	1.219	6.1	1.163	0	0	47	333	169	3.9
112170	2	57	1	1	29751.71817	30121.62001	58	44	91	31	22	5.71	105	40	63.65	26	6.83	22	14.3	148	286	1.356	4	142	6.84	2.2	6.103	70	2.902	5.4	1.034	2	2	31	40	148	4
120770	1	54	1	1	40274.2555	45273.94127	58	40	86	98	30	2.86	97	49	87.52	34	6.16	460	41	NA	282	1.421	3.7	142	10.26	2.475	3.181	74	3.161	6.8	1.11	0	0	98	49	164	3.7
116650	2	58	4	2	5020.944512	5698.842085	57	41	84	43	22	5.36	105	49	40.66	29	8.38	27	22	153	285	0.872	3.8	141	5.13	2.075	4.784	70	2.585	3.2	1.102	0	0	43	49	153	3.8
111797	1	61	1	2	36720.62647	38752.48675	56	46	90	38	31	5	100	51	75.14	27	7.22	169	29	155	283	0.969	4	141	15.39	2.375	6.103	73	2.45	4.6	0.99	0	0	38	51	155	4
111502	2	64	2	2	5729.059448	6007.180078	55	38	62	42	25	8.93	99	129	89.28	38	4.88	15	16.5	165	283	0.904	3.8	140	11.97	2.325	4.681	76	1.4	6.9	1.224	0	0	42	129	165	3.8
122915	2	60	2	2	4783.669311	4947.43167	54	39	87	65	26	4.64	100	70	56.58	38	3.94	63	12.9	183	284	1.259	3.2	143	15.39	2.3	5.844	77	3.105	5.1	0.973	1	1	65	70	183	3.2
114305	2	64	1	2	91629.36742	90961.75756	54	45	113	37	23	4.64	99	60	69.84	29	6	178	17.9	193	278	1.066	3.9	139	8.55	2.375	7.37	74	2.518	6.1	1.11	2	2	37	60	193	3.9
117150	1	64	1	1	39637.24567	41512.73431	54	43	148	38	23	5.36	105	330	100.78	33	5.38	28	10.7	185	288	1.195	4.9	144	5.13	2.35	3.776	76	1.185	6.3	0.817	2	2	38	330	185	4.9
117130	2	51	4	1	17851.77265	19661.68899	53	42	112	54	25	4.64	100	67	64.53	30	4.55	219	16.5	148	282	0.969	4.5	142	5.13	2.275	5.637	72	1.716	5.9	0.84	2	2	54	67	148	4.5
121708	2	65	3	1	7462.541623	8042.98473	53	48	72	37	26	3.57	97	109	44.2	27	7.72	22	27.8	155	279	1.324	3.6	139	6.84	2.475	3.491	75	2.043	5.5	0.941	0	0	37	109	155	3.6
123278	1	59	2	1	14160.97644	16321.19872	53	43	85	30	27	6.07	101	350	105.2	30	4.77	112	12.9	201	290	1.195	4	145	8.55	2.45	5.482	73	2.732	5.2	1.147	2	2	30	350	201	4
115868	1	53	2	1	10685.19647	11410.9518	53	42	109	24	26	2.86	103	312	91.05	29	4.72	173	20.4	168	281	1.292	4.9	142	3.42	2.3	5.431	71	2.981	6.5	0.766	NA	3	24	312	168	4.9
117414	2	63	1	1	202217.5892	206791.8643	53	39	84	40	20	5.71	101	57	72.49	27	5.72	36	16.8	127	273	1.421	4.3	136	3.42	2.375	5.094	66	0.723	4.4	1.008	2	2	40	57	127	4.3
110509	1	60	1	2	39321.59099	42458.51145	52	39	94	39	27	8.57	99	188	99.01	33	5.16	34	22.9	218	281	0.84	4.6	139	6.84	2.375	4.448	72	0.395	5.5	0.955	2	2	39	188	218	4.6
120527	1	55	3	1	13777.90486	14089.71121	52	44	99	31	26	6.07	98	64	54.81	31	13.54	39	24	139	291	1.13	3.9	141	11.97	2.4	5.689	75	1.423	5.5	0.986	0	0	31	64	139	3.9
113189	1	52	2	1	4953.13731	4971.522551	52	40	74	39	29	6.43	102	531	135.25	35	5.66	69	12.7	198	285	1.162	3.6	142	5.13	2.35	5.586	75	1.818	10.9	1.032	0	0	39	531	198	3.6
112951	1	62	1	1	66431.83297	72255.8867	52	41	64	33	27	5.36	99	153	90.17	24	5.22	30	20.2	NA	284	1.195	3.7	142	18.81	2.325	4.474	65	2.326	7.6	1.164	NA	3	33	153	164	3.7
113664	1	80	2	2	5200.056534	5267.945929	51	43	42	87	31	12.5	90	131	773.5	35	5.05	23	13.3	154	289	1.098	4.2	141	11.97	2.7	6.543	78	1.592	4.2	1.627	0	0	87	131	154	4.2
117816	1	67	2	2	6528.965592	6757.691594	51	40	69	38	25	3.57	101	272	72.49	32	4.66	71	9.9	146	278	1.162	4.3	140	5.13	2.35	3.129	72	1.129	5	0.916	0	0	38	272	146	4.3
117866	1	51	4	1	21743.04674	24839.99799	51	40	68	70	29	6.07	103	977	94.59	31	5.77	23	14.1	208	289	1.033	4.5	144	8.55	2.275	4.344	71	0.723	6.5	0.894	2	2	70	977	208	4.5
112783	1	55	4	1	20299.42268	21081.8696	50	39	63	28	27	5	100	504	78.68	27	5.11	24	15.6	86	280	1.195	4.3	140	10.26	2.25	4.526	66	1.66	6.2	1.145	2	2	28	504	86	4.3
113224	1	73	2	1	9699.481847	9760.938192	50	43	66	26	29	3.93	101	68	81.33	30	5.77	49	14.9	224	283	1.13	4.7	142	6.84	2.45	5.431	73	1.479	5	1.222	2	2	26	68	224	4.7
123173	1	60	2	1	5398.455464	5786.209251	50	36	86	49	17	4.64	103	195	103.43	39	10.49	310	14	107	277	0.969	3.9	136	3.42	2.2	6.62	75	17.262	6.8	1.191	0	0	49	195	107	3.9
118279	2	65	1	1	89999.44798	89128.15772	50	40	114	34	26	5.71	108	214	65.42	26	5.66	51	15	196	292	1.324	4.5	146	8.55	2.175	4.603	66	1.671	3.8	1.14	2	2	34	214	196	4.5
120939	1	63	3	1	12781.28148	14038.3978	49	40	61	42	27	2.86	100	79	55.69	35	9.38	79	32.2	126	280	1.066	4.6	139	11.97	2.3	5.069	75	1.671	6	1.027	0	0	42	79	126	4.6
116375	1	54	1	1	193658.9618	208576.9791	49	42	74	32	25	5.71	103	151	78.68	35	13.32	75	26.1	148	294	1.001	4.1	143	15.39	2.425	3.827	77	3.737	4.9	1.173	2	2	32	151	148	4.1
109327	2	58	3	1	20793.08954	20026.35896	48	43	103	27	27	5.36	100	134	72.49	29	5.11	42	18.4	147	287	1.292	4.7	144	18.81	2.475	5.301	72	1.987	4.3	0.946	2	2	27	134	147	4.7
109495	1	52	1	1	171689.4366	174712.4273	48	43	95	34	24	5.71	94	314	74.26	25	6.05	55	13.6	119	266	1.324	3.9	132	8.55	2.35	6.206	68	8.298	5	1.198	2	2	34	314	119	3.9
123504	1	54	4	2	12035.3453	12407.52596	47	43	66	26	23	5.71	104	189	87.52	31	5.66	30	11.1	128	283	1.162	4.2	141	5.13	2.3	3.233	74	1.479	6.3	1.095	2	2	26	189	128	4.2
109971	2	58	2	2	11902.98932	13094.83952	47	40	96	39	26	4.28	102	112	80.44	39	5.22	36	7.9	271	283	1.13	3.3	142	8.55	2.3	4.913	79	1.231	6.6	0.868	0	0	39	112	271	3.3
112739	2	57	2	2	4449.93764	4992.792212	47	42	72	38	24	5.71	103	448	68.07	33	5.33	50	20.1	246	284	1.356	3.3	142	5.13	2.35	5.198	75	0.892	5.2	0.945	0	0	38	448	246	3.3
112194	2	69	1	2	37922.65887	41008.0431	47	42	57	30	25	10.35	105	38	61	23	5.22	15	19.2	150	289	1.259	4.1	142	8.55	2.275	4.06	65	1.106	3.1	0.888	2	2	30	38	150	4.1
117437	1	55	4	1	24626.01124	28081.49476	47	44	108	36	26	3.57	104	605	78.68	28	5.11	204	21.7	243	286	1.098	4.4	144	29.07	2.3	4.396	72	0.79	5.8	1.034	2	2	36	605	243	4.4
111927	2	54	4	1	8804.132241	8611.104223	47	45	97	32	23	5.36	99	237	61.88	34	5.38	25	16.7	165	278	1.259	4.1	139	13.68	2.45	5.482	79	1.434	6.5	1.01	2	2	32	237	165	4.1
116347	1	79	1	1	80087.22521	80945.82035	47	42	33	60	26	10.71	98	684	80.44	32	5.16	27	13.3	184	282	1.066	4.3	138	6.84	2.475	5.844	74	4.087	6.3	1.476	2	2	60	684	184	4.3
114708	1	51	1	1	16349.66216	17316.40708	47	45	77	27	31	6.78	101	122	96.36	28	5.27	49	33.3	152	283	1.259	4.9	141	11.97	2.35	4.913	73	2.958	6.9	1.169	2	2	27	122	152	4.9
111640	1	51	4	2	8099.572343	8938.797024	46	38	96	43	22	4.28	106	519	70.72	33	6.77	30	6.1	161	279	1.001	4	139	5.13	2.2	4.37	71	1.4	5.2	1.222	NA	3	43	519	161	4
111875	2	56	4	2	16912.30667	18283.78639	46	37	102	35	26	6.07	106	55	77.79	25	5.44	60	12.9	189	290	1.292	4.7	145	5.13	2.2	5.663	62	1.129	4.4	0.94	0	0	35	55	189	4.7
121067	1	60	4	1	8265.990785	8711.275622	46	37	102	27	24	4.28	102	88	85.75	28	6.55	43	19.7	146	278	1.098	4.3	139	10.26	2.325	2.974	65	1.456	6.5	1.169	2	2	27	88	146	4.3
116632	1	80	3	1	12758.61008	12993.44391	46	37	129	54	25	9.64	105	180	152.93	35	8.99	86	34.2	279	294	1.001	4.3	143	10.26	2.175	6.206	72	1.298	6.5	1.175	2	2	54	180	279	4.3
113735	1	50	1	1	69455.49956	74775.2496	46	41	68	44	23	5.71	100	220	94.59	27	5.16	21	9	155	280	1.195	3.8	140	5.13	2.275	5.663	68	1.434	6.3	0.843	2	2	44	220	155	3.8
113770	1	52	1	2	132580.2774	150054.7687	45	45	61	37	23	5.71	103	68	86.63	32	4.88	110	14.9	155	280	1.033	4.3	140	13.68	2.35	6.517	77	2.021	7.7	1.175	NA	3	37	68	155	4.3
123235	2	73	4	1	39885.35258	53947.88125	45	47	79	36	18	5	104	101	59.23	23	7.72	65	33	218	288	1.098	4.3	143	10.26	2.375	4.888	70	1.355	4.9	0.972	1	1	36	101	218	4.3
117551	1	64	4	1	6231.479913	6806.629053	45	45	37	32	24	2.86	99	139	64.53	26	7.72	22	15.9	125	278	1.292	4.2	139	6.84	2.325	3.129	71	1.05	6.2	0.832	0	0	32	139	125	4.2
121590	2	63	4	1	14026.50324	14309.7597	45	43	67	46	26	5	84	81	50.39	34	7.49	104	10.6	159	261	1.259	3.5	129	8.55	2.325	3.646	77	1.276	5.4	0.828	2	2	46	81	159	3.5
123713	2	50	4	1	16560.83234	18215.58903	45	45	52	27	27	5.71	100	229	72.49	27	4.66	82	20.4	213	282	1.324	4	141	27.36	2.45	5.586	72	1.106	4.7	1.056	2	2	27	229	213	4
119507	1	56	3	1	11750.80894	12834.36862	45	42	89	26	25	4.64	103	60	87.52	29	5.88	31	20.4	145	284	0.775	4	142	8.55	2.275	5.508	71	2.8	5.5	1.027	2	2	26	60	145	4
109831	1	50	1	1	113475.6875	129350.6312	45	43	71	23	23	3.93	98	101	90.17	29	5.05	102	27.4	141	277	1.098	4.1	139	8.55	2.425	7.422	72	2.156	5	0.877	2	2	23	101	141	4.1
121526	2	56	4	1	9962.205789	10179.75543	44	39	77	32	25	5.71	101	104	60.11	33	5.33	84	11.6	165	280	1.001	4.2	140	6.84	2.3	5.017	72	1.016	6.3	0.997	0	0	32	104	165	4.2
123492	1	69	2	1	6775.69181	7135.697596	44	42	67	NA	21	9.28	96	218	114.92	33	4.88	52	25.4	NA	274	1.453	4.2	135	3.42	2.475	4.474	75	7.88	9.5	0.95	2	2	22	218	164	4.2
111078	2	67	1	1	8568.025527	8777.568251	44	41	53	43	29	7.5	103	177	58.34	24	4.55	10	11.5	218	291	1.195	3.8	145	18.81	2.35	4.655	65	0.881	4.5	0.838	2	2	43	177	218	3.8
110061	1	61	4	2	15683.01586	17360.73724	43	46	87	31	20	4.28	94	90	68.07	32	6	329	19.5	91	272	1.066	4.1	136	6.84	2.475	7.293	78	2.043	8	0.844	1	1	31	90	91	4.1
114369	2	56	4	2	12840.94801	14047.00262	43	40	85	37	30	4.28	105	100	61.88	30	4.88	37	19.3	182	290	1.292	4.2	146	13.68	2.275	5.327	70	0.824	4.7	0.813	1	1	37	100	182	4.2
111433	1	51	3	2	23587.42222	25653.72133	43	43	81	34	25	6.78	102	227	83.1	34	5.94	136	40.5	210	282	1.195	3.8	140	15.39	2.3	6.93	77	5.668	10.3	0.864	0	0	34	227	210	3.8
122753	1	72	1	2	14747.84472	15702.06785	43	38	51	62	21	8.93	103	629	106.96	30	6.44	66	25.8	282	292	0.969	4	144	6.84	2.25	3.905	68	1.31	8.2	1.382	2	2	62	629	282	4
118111	2	54	4	1	10991.07186	11362.50212	43	41	92	30	21	6.78	99	128	54.81	31	5.83	51	18.4	166	278	1.033	4.2	138	6.84	2.3	6.258	72	2.145	6.3	0.837	2	2	30	128	166	4.2
119337	2	75	1	1	56444.91163	69608.68045	43	42	142	46	27	7.5	102	225	76.02	36	4.66	463	13.8	177	282	1.259	4.4	140	3.42	2.35	4.862	78	1.863	5.5	1.119	2	2	46	225	177	4.4
114585	2	55	1	1	80627.41845	86337.57279	43	44	125	30	25	5.36	98	138	68.07	31	4.94	15	20.8	169	276	1.259	4	138	5.13	2.475	4.681	75	1.818	5.6	0.839	2	2	30	138	169	4
111043	1	77	4	2	8086.304519	8494.518285	42	41	78	27	26	3.93	102	59	75.14	36	5.05	119	31.2	138	282	1.066	3.6	142	13.68	2.225	4.732	77	2.123	6.2	1.029	NA	3	27	59	138	3.6
116900	1	55	2	2	6524.110139	6760.04848	42	39	74	30	23	3.93	104	270	89.28	35	5.83	50	12.2	163	279	1.162	3.9	140	6.84	2.225	4.758	74	1.005	7.7	1.071	0	0	30	270	163	3.9
118727	2	66	4	1	5501.076212	5936.573412	42	41	40	49	26	8.57	99	575	71.6	27	4.5	11	11.6	320	281	1.098	4.1	139	5.13	2.35	3.931	68	0.689	3.8	0.881	0	0	49	575	320	4.1
111012	2	65	4	1	18498.75575	20277.11313	42	39	143	52	25	3.57	100	156	45.97	32	9.77	169	17.2	188	281	0.872	3.8	139	5.13	2.375	4.965	71	2.247	3.6	0.922	NA	3	52	156	188	3.8
123264	2	56	4	1	11689.1426	11665.45602	42	36	179	28	27	5.71	100	64	72.49	37	5.22	62	11.8	164	284	1.485	3.9	142	3.42	2.325	4.448	73	1.66	3.9	0.943	NA	3	28	64	164	3.9
118045	1	51	4	1	5840.905105	6569.934448	42	45	87	21	28	3.93	101	93	74.26	28	4.94	74	25.1	148	282	1.195	3.7	142	13.68	2.3	5.844	73	1.219	5.4	1.028	2	2	21	93	148	3.7
115807	1	65	3	1	13410.22149	14575.09504	42	48	87	28	24	5.36	102	77	73.37	32	6	24	20.1	143	284	0.936	4.4	142	13.68	2.45	3.026	80	1.05	6.6	1.202	0	0	28	77	143	4.4
122962	2	63	3	1	7551.130474	8127.623159	42	39	101	36	25	5	102	40	50.39	31	7.44	28	10.2	179	280	1.324	4	139	6.84	2.2	4.422	70	2.111	6.1	0.98	2	2	36	40	179	4
111896	1	65	2	1	7100.977301	7556.298528	42	42	97	30	26	5.71	96	136	84.86	30	8.66	27	17.9	150	274	0.969	4.1	135	6.84	2.3	4.37	72	1.14	7.6	1.162	2	2	30	136	150	4.1
120962	1	58	2	1	6093.810401	6586.188003	42	45	104	34	27	4.64	101	335	121.99	38	4.55	49	10	154	280	0.936	3.7	141	11.97	2.475	5.637	83	1.852	5.5	0.761	1	1	34	335	154	3.7
113209	2	52	2	1	19713.17197	22412.17361	42	40	80	35	27	5	102	54	84.86	32	4.11	40	18.1	169	282	1.195	4.2	142	5.13	2.35	7.086	72	2.823	3.8	0.804	2	2	35	54	169	4.2
113237	1	59	1	1	20446.46889	21834.21802	42	42	72	26	26	6.07	100	106	77.79	25	4.94	35	10.6	127	280	1.13	4	140	6.84	2.425	4.965	67	2.642	6.2	1.231	1	1	26	106	127	4
115242	2	56	1	1	13876.40804	13989.79822	42	42	76	24	26	6.07	97	66	53.92	28	19.76	50	14.3	137	288	1.195	4.3	136	8.55	2.425	5.069	70	2.382	4.5	0.995	2	2	24	66	137	4.3
115185	2	55	4	2	12945.50416	14542.14507	41	44	65	34	23	5	99	71	46.85	31	5.11	75	14	143	276	1.098	3.8	138	6.84	2.475	4.655	75	1.31	3.4	1.023	0	0	34	71	143	3.8
123523	1	50	1	2	31119.07605	33132.951	41	35	112	30	25	4.64	93	90	70.72	35	19.54	65	11.3	174	279	1.162	4.7	132	6.84	2.35	5.741	70	1.581	3	1.315	NA	3	30	90	174	4.7
122959	1	62	4	1	6952.372464	7527.700108	41	42	65	27	26	4.64	103	116	78.68	29	6	54	35.5	139	284	0.807	4.4	142	11.97	2.325	3.698	71	0.756	7.4	1.134	2	2	27	116	139	4.4
123043	2	54	4	1	7194.198565	7579.57345	41	34	187	39	27	5	99	82	42.43	37	16.65	170	16.8	166	289	1.162	4.1	139	8.55	2.25	3.879	71	1.411	3.3	1.156	0	0	39	82	166	4.1
111077	2	67	3	1	12521.33586	13280.90046	41	36	77	37	22	5.71	103	89	71.6	26	5.38	54	20.8	182	279	1.066	3.9	139	22.23	2.275	4.189	62	1.919	8	0.75	2	2	37	89	182	3.9
116174	2	50	2	1	11444.86322	11962.79366	41	40	72	42	27	4.64	103	193	61.88	33	4.66	21	6.3	183	277	1.001	4.2	139	5.13	2.2	4.241	73	0.61	3	0.955	0	0	42	193	183	4.2
121816	1	78	1	1	38859.92349	41251.16444	41	44	52	28	25	6.07	103	152	75.14	29	4.83	44	19.2	156	288	1.098	4	144	6.84	2.325	4.138	73	2.405	4.6	1.214	2	2	28	152	156	4
114540	1	70	4	1	12662.59362	13935.595	40	46	118	37	27	4.64	103	183	97.24	25	5.27	18	16.3	211	285	0.969	5.2	143	22.23	2.225	3.31	71	0.79	5.6	0.997	0	0	37	183	211	5.2
123577	1	55	4	1	10933.54808	11004.25637	40	38	83	29	25	6.07	102	103	95.47	35	5.11	30	9.9	186	288	1.098	4.3	144	5.13	2.275	5.12	73	3.15	7.2	1.212	NA	3	29	103	186	4.3
122776	1	63	3	1	6079.025854	6451.338646	40	43	114	25	21	5	101	108	65.42	30	5.61	35	16.5	150	276	0.807	3.8	138	5.13	2.275	4.784	73	2.01	5.9	0.97	0	0	25	108	150	3.8
123638	1	54	2	1	15882.0374	17270.99075	40	47	63	33	29	4.28	99	436	71.6	31	8.05	23	11.5	160	285	0.969	3.9	142	6.84	2.525	4.888	78	1.456	6.2	1.06	2	2	33	436	160	3.9
123928	1	50	2	1	15938.777	18048.72362	40	36	68	23	28	5.71	91	178	95.47	36	5.05	27	19.7	173	273	0.775	2.8	136	3.42	2.25	5.198	72	1.31	8.2	1.082	2	2	23	178	173	2.8
112126	2	68	1	1	26459.58881	25785.70428	40	47	137	34	24	4.28	95	67	57.46	26	5.33	283	21.7	120	268	1.001	4	134	6.84	2.525	5.534	73	2.134	6.6	1.045	0	0	34	67	120	4
123277	1	54	1	1	18263.51882	18554.71369	40	41	73	27	23	5	100	423	76.91	28	6.27	21	18.4	206	277	0.904	4.1	138	8.55	2.325	4.163	69	0.745	4.3	1.196	0	0	27	423	206	4.1
117058	2	60	4	2	4090.77077	4141.107025	39	39	76	47	24	3.57	106	165	64.53	31	5.11	41	12.9	220	284	0.936	4	143	6.84	2.275	6.31	70	1.106	4.8	1.084	2	2	47	165	220	4
112968	2	52	4	2	25782.16463	28148.19178	39	40	75	26	30	7.85	103	74	60.11	32	5.27	49	12.5	162	290	1.259	4.3	144	3.42	2.35	4.629	72	0.79	4.2	0.74	2	2	26	74	162	4.3
122400	1	61	2	2	2927.995987	3190.003979	39	41	115	37	31	5.36	95	631	110.5	35	7.94	87	4.3	246	285	1.066	3.7	141	17.1	2.725	4.06	76	2.45	6.5	1.427	2	2	37	631	246	3.7
109552	1	74	1	2	20658.388	21909.8997	39	39	63	31	23	8.21	102	206	100.78	34	8.94	37	13.8	162	285	1.195	4.2	139	1.71	2.35	7.034	73	3.703	8.1	1.003	2	2	31	206	162	4.2
118915	2	56	1	2	36688.43329	39516.86296	39	39	85	31	32	3.93	101	61	55.69	25	4.88	54	16.7	128	282	1.292	4.2	142	6.84	2.225	3.853	64	0.677	3.2	0.865	0	0	31	61	128	4.2
121891	2	53	1	2	34497.08569	36118.18819	39	40	102	24	22	7.85	102	131	57.46	28	7.88	30	16.3	148	289	1.292	3.7	142	8.55	2.4	5.043	68	2.405	4.8	0.755	0	0	24	131	148	3.7
122848	1	73	4	1	12068.20402	12628.36056	39	39	53	35	26	11.42	100	232	125.53	39	8.99	96	19.5	165	292	1.259	4.1	141	10.26	2.45	3.207	78	1.863	5.4	1.211	0	0	35	232	165	4.1
117792	2	60	4	1	8055.840642	8540.791419	39	44	67	23	24	4.64	102	146	68.07	34	5.61	82	16.8	195	283	1.259	4.3	142	5.13	2.25	5.327	78	1.852	6.3	0.884	2	2	23	146	195	4.3
121020	1	55	4	1	11293.83503	12018.34368	39	41	44	31	26	5	100	208	73.37	36	5.16	49	13.4	183	285	1.066	3.1	143	8.55	2.3	5.353	77	1.389	6.8	1.005	2	2	31	208	183	3.1
114059	2	68	2	1	7619.713914	7800.603446	39	41	73	32	29	3.21	101	235	75.14	32	4.83	30	16.8	181	283	1.098	4.4	143	6.84	2.425	4.965	73	1.592	6.3	0.969	2	2	32	235	181	4.4
122245	1	54	2	1	19996.28122	21327.30868	39	40	91	42	31	2.86	97	170	117.57	44	5.44	134	46.9	157	278	1.292	4.5	140	30.78	2.45	5.327	84	0.937	6.4	0.959	NA	3	42	170	157	4.5
120600	1	72	1	1	10024.58932	10491.88812	39	44	90	31	29	6.07	97	55	72.49	30	8.38	40	27.2	122	278	1.033	4	137	23.94	2.3	4.138	74	1.321	7.2	1.12	0	0	31	55	122	4
121383	1	70	1	1	93268.45955	109022.2548	39	40	84	35	28	5.36	94	220	70.72	30	10.94	53	16.7	161	276	1.098	3.5	135	13.68	2.45	3.491	70	1.231	6.6	1.366	2	2	35	220	161	3.5
118496	1	57	3	2	8242.20945	8949.066096	38	40	71	24	27	5.71	102	224	96.36	31	4.94	26	10.6	165	284	1.356	4.2	142	5.13	2.175	4.655	71	1.964	7.8	1.02	2	2	24	224	165	4.2
119886	2	73	2	2	16486.1429	18331.2184	38	38	94	30	30	3.21	104	195	81.33	30	4.5	130	15.2	232	288	1.13	3.9	146	8.55	2.35	8.017	68	2.303	5.8	1.225	0	0	30	195	232	3.9
123801	1	58	1	2	22276.54705	26009.19481	38	41	82	29	24	2.5	101	63	65.42	27	5.44	93	14.3	157	277	1.066	4.1	140	5.13	2.35	5.482	68	1.671	5.7	0.919	1	1	29	63	157	4.1
112079	2	70	4	1	13906.63068	15528.86077	38	40	100	31	29	7.85	103	95	87.52	29	7.88	45	21.9	132	294	1.356	4.4	145	8.55	2.35	4.707	69	1.919	5.5	1.035	2	2	31	95	132	4.4
124484	2	56	4	1	6280.647372	6576.78622	38	47	82	31	26	5.36	103	137	68.95	26	4.88	57	15.9	168	287	1.066	3.8	144	5.13	2.525	4.422	73	0.948	3.1	0.851	0	0	31	137	168	3.8
121325	1	55	4	1	7063.880681	7232.45579	38	40	100	26	27	8.57	98	143	111.38	35	6	35	15	154	280	1.227	3.8	138	11.97	2.275	4.189	75	2.45	5.5	0.832	NA	3	26	143	154	3.8
124124	1	50	4	1	15004.66868	15974.94397	38	44	85	22	25	5.71	104	137	90.17	30	4.66	53	11.6	132	284	1.292	4.2	142	10.26	2.275	5.172	74	2.687	5.7	1.073	2	2	22	137	132	4.2
123948	1	50	4	1	8505.028948	9592.623728	38	39	99	25	24	5	101	142	72.49	27	6.61	178	10.9	118	279	1.292	3.8	139	3.42	2.25	6.284	66	7.259	7.9	1.027	NA	3	25	142	118	3.8
124714	2	80	1	1	16769.02701	19285.0757	38	41	117	50	25	6.78	102	92	74.26	26	6.05	107	25.4	498	284	1.162	4.2	141	8.55	2.45	5.819	67	0.745	4.2	0.824	2	2	50	92	498	4.2
119022	1	64	1	1	87608.15654	102683.7595	38	47	92	29	24	7.5	100	90	76.91	32	4.5	80	10.9	NA	281	1.227	4.2	140	11.97	2.25	4.37	79	1.806	7	1.038	2	2	29	90	164	4.2
111173	2	58	1	1	57235.40829	65544.68677	38	49	74	37	27	5.36	90	93	59.23	22	4.94	47	22	184	259	1.195	4.5	129	11.97	2.525	6.905	71	0.982	5.2	0.947	NA	3	37	93	184	4.5
112327	1	57	1	1	100004.0538	111144.6112	38	39	98	27	29	5	99	209	68.07	29	5.61	52	16.5	182	289	1.162	3.5	145	10.26	2.2	4.086	68	1.321	8.5	1.01	2	2	27	209	182	3.5
120330	1	50	1	1	39620.66379	42385.47078	38	40	66	20	26	5.36	100	73	68.07	27	6.22	35	12.9	126	277	0.904	3.9	138	8.55	2.25	5.198	67	1.671	5.5	1.151	2	2	20	73	126	3.9
121821	2	58	3	2	11575.84903	11607.6916	37	38	88	43	29	3.57	99	122	51.27	50	4.61	44	11.3	187	279	1.292	4	141	6.84	2.3	5.663	88	3.026	4.6	1.217	NA	3	43	122	187	4
121894	1	57	3	2	24462.32145	27288.64872	37	40	86	23	27	6.07	102	80	83.98	30	5.55	23	12.4	129	287	1.033	4.3	143	6.84	2.325	4.422	70	0.892	3.9	1.075	2	2	23	80	129	4.3
113281	1	52	3	2	10576.62971	11075.40583	37	43	113	24	24	4.28	103	104	61.88	35	4.66	56	12.4	177	284	1.227	3.9	143	5.13	2.25	4.836	78	1.366	6.4	0.976	0	0	24	104	177	3.9
113258	1	53	1	2	9293.823491	9831.899474	37	38	79	50	31	2.5	99	61	64.53	38	5.5	153	12.4	257	283	0.904	2.9	143	10.26	2.075	5.586	76	1.987	7.3	1.011	0	0	50	61	257	2.9
121329	2	63	1	2	30514.69346	30216.49779	37	34	201	49	26	6.43	102	28	77.79	39	6	106	5.6	195	284	0.936	3.3	141	5.13	2.275	3.388	73	0.948	4.7	0.856	0	0	49	28	195	3.3
121163	2	72	4	1	12148.9299	13613.03286	37	34	94	NA	26	7.14	99	126	68.95	35	8.83	48	15.6	NA	285	1.066	3.9	140	10.26	2.275	3.595	69	0.971	7.1	0.745	0	0	22	126	164	3.9
113437	1	62	4	1	12374.29672	13252.72932	37	40	108	39	22	4.64	103	88	75.14	36	6.33	258	15.8	127	284	1.098	4	142	10.26	2.35	3.465	76	2.168	4.8	1.063	NA	3	39	88	127	4
123416	1	61	4	1	4023.564629	4259.264164	37	43	47	32	29	4.28	96	312	81.33	39	5.38	46	19.3	151	275	1.259	4	138	10.26	2.4	5.172	82	1.806	6.7	1.041	0	0	32	312	151	4
117400	1	60	4	1	8901.767793	9171.131999	37	45	61	35	30	4.64	95	592	55.69	25	5.5	61	24.4	190	276	1.162	3.9	138	17.1	2.325	7.318	70	1.4	4.6	0.845	2	2	35	592	190	3.9
110716	2	55	4	1	9065.514124	9529.94791	37	41	94	25	25	5.36	100	132	65.42	33	6.38	41	12.9	161	281	1.356	3.9	140	6.84	2.325	3.491	74	1.716	4.6	0.884	2	2	25	132	161	3.9
111192	1	54	4	1	5431.673153	5786.907952	37	40	107	18	26	6.07	100	241	89.28	27	5.5	75	21.9	122	281	1.195	3.8	140	6.84	2.275	6.284	67	4.335	6.7	0.912	0	0	18	241	122	3.8
121995	2	51	4	1	15995.93499	16633.75967	37	43	73	28	29	2.86	99	71	45.97	25	5.33	11	15.4	153	279	1.259	4.2	141	5.13	2.4	4.267	68	0.847	3.8	0.844	2	2	28	71	153	4.2
109656	2	60	3	1	4575.738564	4857.666209	37	42	67	28	24	5.36	104	123	59.23	25	5.27	14	15.8	157	287	1.195	4.2	144	5.13	2.3	4.965	67	1.185	4.4	1.01	2	2	28	123	157	4.2
110147	2	60	3	1	20238.74036	21019.91452	37	33	78	56	25	6.43	105	43	53.04	32	5.5	64	20.2	142	283	1.195	3.6	141	13.68	2.175	4.603	65	1.569	6	0.834	2	2	56	43	142	3.6
123656	1	54	3	1	28825.94649	30100.40684	37	38	80	35	25	5	99	264	71.6	31	5.11	48	26.1	193	276	1.13	3.8	138	3.42	2.2	4.655	69	1.095	5.4	1.085	2	2	35	264	193	3.8
115996	1	74	2	1	18698.24868	20319.49702	37	35	150	24	28	10	102	99	169.73	25	5.27	207	6.8	216	292	1.066	3.9	144	8.55	1.975	3.207	60	0.881	9.1	1.248	2	2	24	99	216	3.9
124078	1	57	2	1	16650.4885	17195.97531	37	37	91	25	30	5.36	98	205	95.47	39	5.05	68	10.7	160	284	0.936	3.4	142	6.84	2.375	5.12	76	2.066	9.5	1.16	2	2	25	205	160	3.4
115046	1	52	2	1	17483.47704	18783.08744	37	42	77	26	29	4.64	99	228	91.05	35	5.38	19	16.7	150	278	1.001	3.9	139	11.97	2.25	5.586	77	1.287	6.8	1.091	2	2	26	228	150	3.9
115146	1	80	1	1	16800.76868	21577.28837	37	40	70	32	26	6.07	101	236	98.12	27	5.61	23	18.3	228	289	1.098	4.2	144	8.55	2.35	3.62	67	1.852	5.8	1.033	2	2	32	236	228	4.2
122047	1	80	1	1	64373.8595	73270.94436	37	37	120	27	31	4.28	100	184	75.14	25	7.66	8	5.7	127	279	1.195	4.4	139	3.42	2.1	2.793	62	1.005	5.5	0.788	2	2	27	184	127	4.4
116596	1	52	1	1	24502.80374	26381.51298	37	43	96	30	27	3.93	104	247	88.4	35	4.33	39	17	214	289	1.324	4.2	146	8.55	2.375	5.508	78	3.319	6.5	0.89	0	0	30	247	214	4.2
120983	2	60	4	2	12698.52175	13161.65918	36	37	70	20	25	7.5	100	67	65.42	29	5.55	158	14.5	163	277	1.582	4.4	137	5.13	2.325	5.793	66	1.163	6.4	0.788	2	2	20	67	163	4.4
109620	2	59	4	2	17116.41848	18138.48109	36	39	225	53	23	2.86	100	116	50.39	41	8.16	321	18.1	185	275	1.227	3.9	137	20.52	2.3	5.819	80	1.603	4.9	1.098	0	0	53	116	185	3.9
111635	1	64	2	2	4237.141335	4384.514911	36	46	76	29	24	6.43	104	164	73.37	26	5.33	118	22.9	148	283	1.001	4.2	141	11.97	2.275	4.784	72	0.847	5	0.912	2	2	29	164	148	4.2
124158	1	54	2	2	6788.437264	7040.662974	36	38	62	31	22	4.64	101	249	64.53	34	8.05	21	17.7	150	275	1.001	4.3	136	10.26	2.275	4.241	72	2.089	8.2	1.228	NA	3	31	249	150	4.3
110822	1	73	1	2	8036.822394	8112.954651	36	43	87	40	23	9.28	94	56	104.31	30	8.1	54	5.2	161	276	1.066	4	134	3.42	2.275	3.646	73	0.892	4	0.749	0	0	40	56	161	4
109503	1	71	1	2	10459.94185	11022.12101	36	41	57	35	26	4.64	100	41	70.72	31	5.55	73	33	121	276	1.098	4.3	138	18.81	2.375	4.034	72	1.456	7	1.106	2	2	35	41	121	4.3
115489	1	52	1	2	34553.34277	36235.48747	36	42	97	28	27	4.64	99	440	72.49	29	4.72	90	12.5	184	281	1.227	4.1	141	3.42	2.375	4.396	71	1.219	4.9	1.132	NA	3	28	440	184	4.1
114861	2	65	4	1	12837.19809	13388.02633	36	44	79	38	24	3.93	100	107	57.46	32	4.88	20	18.3	186	280	1.195	4	141	6.84	2.2	5.224	76	1.614	5.3	1.069	0	0	38	107	186	4
110935	1	61	4	1	12222.24087	13349.68811	36	39	86	22	25	7.14	106	385	70.72	36	5.88	31	21.5	186	294	0.872	4.6	146	5.13	2.225	4.474	75	1.479	4.7	0.845	NA	3	22	385	186	4.6
117900	1	55	4	1	23585.937	24220.36984	36	41	80	24	26	6.07	100	294	100.78	34	4.5	37	8.6	160	282	1.485	4.8	141	3.42	2.4	4.629	75	3.522	7.5	1.221	0	0	24	294	160	4.8
109874	1	55	4	1	24885.10943	24881.94387	36	46	79	29	29	6.78	99	126	93.7	27	4.72	73	18.4	153	286	1.195	4	143	34.2	2.475	4.448	73	1.05	4.7	0.83	2	2	29	126	153	4
119358	1	51	4	1	3753.014005	3952.114848	36	40	73	22	28	3.21	99	88	82.21	31	8.22	58	17.6	124	277	1.13	4.3	138	8.55	2.375	4.784	71	1.389	6.7	0.974	0	0	22	88	124	4.3
109415	2	61	2	1	13687.05172	14418.82309	36	34	104	27	26	3.93	103	196	80.44	37	6.88	43	12.9	163	280	0.936	3.8	140	10.26	2.175	6.232	71	1.919	7.1	1.261	2	2	27	196	163	3.8
110426	1	62	1	1	123056.6477	129942.6562	36	43	87	26	26	6.07	104	169	107.85	33	5.05	132	26.1	163	286	1.195	4.6	143	11.97	2.35	3.853	76	1.016	6	1.073	2	2	26	169	163	4.6
118358	1	51	1	1	156143.6148	176314.6122	36	39	61	28	28	5.36	102	177	91.05	30	4.88	20	29.9	168	287	1.066	4.9	144	8.55	2.275	4.319	69	1.423	5.1	1.128	2	2	28	177	168	4.9
123648	1	54	4	2	9569.253478	10407.21026	35	41	96	23	24	6.43	103	197	76.91	29	4.77	27	13.8	152	286	0.969	4.2	143	5.13	2.225	5.663	70	3.963	3.8	0.804	2	2	23	197	152	4.2
109981	2	68	4	2	2957.193502	3204.885238	35	40	97	21	26	7.85	98	117	102.54	31	5.38	62	41	171	283	1.324	4.5	140	5.13	2.3	6.284	71	4.46	8	1.12	0	0	21	117	171	4.5
110690	1	52	2	2	8491.517062	8972.021737	35	46	109	63	26	3.21	98	605	76.02	35	6.05	253	57.3	234	282	1.13	3.4	142	25.65	2.25	3.672	81	3.952	7.4	1.007	2	2	63	605	234	3.4
123934	1	67	4	1	24466.1784	27619.82098	35	42	91	21	27	8.57	101	58	97.24	29	8.22	26	24.4	128	290	1.13	3.8	142	8.55	2.375	3.491	71	0.79	4.7	1.272	NA	3	21	58	128	3.8
121977	1	62	4	1	8807.599715	9635.971611	35	42	76	23	26	4.28	101	166	77.79	35	6.55	47	24.4	160	284	0.904	3.8	142	10.26	2.375	4.732	77	3.534	7	0.991	0	0	23	166	160	3.8
113405	2	59	4	1	21086.82374	22813.05601	35	44	93	29	25	4.28	98	138	59.23	27	7.33	51	14.5	179	277	1.292	3.7	138	17.1	2.475	6.491	71	2.427	6	1.029	0	0	29	138	179	3.7
117046	2	58	4	1	7596.646466	8306.456841	35	44	63	21	27	3.21	100	75	47.74	27	9.16	46	12.2	118	282	1.13	4.3	140	6.84	2.325	5.301	71	1.987	6.1	1.064	NA	3	21	75	118	4.3
111326	2	50	4	1	6803.271024	7396.677591	35	40	83	52	24	5.36	103	114	68.95	35	3.72	189	20.4	201	288	1.162	4.3	145	3.42	2.325	6.491	75	4.324	4.5	1.148	0	0	52	114	201	4.3
114664	1	60	3	1	13410.22149	14575.09504	35	42	69	19	24	6.78	101	151	108.73	31	6.33	84	25.6	171	284	1.033	4.5	141	3.42	2.325	7.422	73	3.376	7	1.147	0	0	19	151	171	4.5
112749	1	55	2	1	11311.31451	11841.51728	35	42	77	35	23	4.28	100	526	74.26	31	5.5	369	15.4	211	275	0.969	3.5	138	8.55	2.325	4.836	73	2.981	7.6	0.953	1	1	35	526	211	3.5
118665	1	70	1	1	55539.06481	58335.50371	35	41	73	24	25	6.78	104	119	100.78	28	5.38	25	13.8	147	287	1.356	4.4	143	8.55	2.4	3.336	69	1.4	6.4	1.091	2	2	24	119	147	4.4
110287	1	68	1	1	59177.78225	66031.17056	35	44	81	33	24	5	103	115	70.72	30	6.16	38	14.1	147	282	1.227	4.2	141	8.55	2.275	4.138	74	0.768	5	1.095	2	2	33	115	147	4.2
119274	1	61	1	1	22156.66266	24461.88223	35	41	84	23	24	6.78	100	141	91.94	31	5.5	24	12	160	274	1.066	4.1	136	8.55	2.3	3.258	72	2.303	6	0.982	0	0	23	141	160	4.1
123002	1	62	4	2	8222.310553	8651.072446	34	47	89	18	24	5.71	99	102	92.82	21	12.71	54	20.1	188	282	1.001	3.7	137	3.42	2.375	3.362	68	4.256	4.3	1.108	0	0	18	102	188	3.7
124100	2	61	4	2	19993.98565	20953.75745	34	39	59	24	28	4.64	101	90	61.88	34	4.94	17	12	153	283	1.292	3.5	142	6.84	2.25	3.957	73	1.603	3	0.837	0	0	24	90	153	3.5
118776	1	55	3	2	12531.85131	13891.41969	34	39	104	30	22	3.93	98	81	62.76	30	5.94	127	35.6	168	276	0.904	4	138	11.97	2.175	5.844	69	4.618	5.7	0.808	0	0	30	81	168	4
109436	1	80	4	1	3465.124395	3494.175689	34	47	54	31	26	6.07	92	268	101.66	29	5	36	27.2	223	269	1.066	4.1	134	11.97	2.45	4.784	76	4.855	7.4	0.862	2	2	31	268	223	4.1
116299	2	58	4	1	10919.784	11671.95748	34	38	60	24	23	5	103	54	58.34	30	7.72	38	24.5	163	286	1.098	4.9	142	8.55	2.225	6.051	68	1.073	6.5	0.773	NA	3	24	54	163	4.9
123549	1	52	4	1	38477.70305	42256.94355	34	42	88	21	29	5.36	100	108	68.95	29	5.44	25	10	115	284	0.969	3.7	142	6.84	2.3	3.388	71	1.31	4.5	0.944	2	2	21	108	115	3.7
119091	1	51	4	1	10172.67889	10058.23525	34	41	102	24	26	6.78	101	172	70.72	33	5.16	32	14.9	NA	279	0.969	4.3	139	6.84	2.275	7.499	74	2.134	6.8	0.966	2	2	24	172	164	4.3
119164	1	68	3	1	7351.644888	7775.324193	34	44	62	22	21	5.71	102	201	68.07	32	8.27	36	18.6	133	283	1.259	4.1	140	8.55	2.325	4.293	76	2.529	4.6	1.068	0	0	22	201	133	4.1
109414	2	62	3	1	10667.50927	11671.75945	34	37	152	26	24	8.93	104	115	104.31	35	4.55	77	8.2	167	287	1.259	3.9	142	5.13	2.225	4.732	72	1.84	8.7	0.721	0	0	26	115	167	3.9
121341	1	61	3	1	3241.764376	3563.807195	34	40	72	23	25	5.36	100	77	72.49	30	5.88	55	23.1	136	279	1.292	4	139	8.55	2.25	5.431	70	1.31	5.3	1.01	0	0	23	77	136	4
112725	2	58	3	1	7589.081317	8294.628964	34	42	106	29	28	6.07	99	189	36.24	31	6.11	12	12.9	185	282	1.388	3.9	140	10.26	2.375	3.181	73	1.005	4.1	0.902	NA	3	29	189	185	3.9
115666	1	56	3	1	14385.39667	14600.3542	34	43	111	28	23	7.14	106	360	104.31	26	5.05	41	14.7	204	291	1.001	4.7	145	8.55	2.325	4.732	69	0.994	7.5	1.341	0	0	28	360	204	4.7
110651	1	63	2	1	12043.93264	12816.20073	34	40	55	20	26	6.43	100	212	102.54	36	6.66	31	12.9	138	279	1.227	4.2	138	3.42	2.3	5.819	76	1.592	6.9	1.208	2	2	20	212	138	4.2
117450	1	56	1	1	125416.8347	137901.6764	34	37	102	27	27	4.64	101	129	91.05	33	5.38	49	22.9	201	281	1.001	4.7	141	6.84	2.275	5.094	70	1.298	5.3	0.918	NA	3	27	129	201	4.7
114908	2	54	1	1	36296.06662	37185.09671	34	37	77	18	24	6.43	104	62	67.18	28	5.33	37	13.1	150	285	1.066	3.8	142	5.13	2.275	5.793	65	2.337	4.6	1.186	2	2	18	62	150	3.8
113010	1	53	1	1	21264.02081	23961.39483	34	44	67	28	23	4.64	98	397	80.44	31	4.88	37	21.7	200	277	1.195	4.1	139	5.13	2.5	4.965	75	1.377	5.9	1.025	0	0	28	397	200	4.1
118992	1	51	1	1	45919.68133	47704.3425	34	39	56	17	21	6.78	106	110	97.24	25	6.66	20	16.1	143	287	1.324	4.3	142	8.55	2.325	3.31	64	0.914	6.3	0.934	2	2	17	110	143	4.3
115647	2	73	4	2	7372.444423	8005.917037	33	45	74	25	27	4.64	102	70	57.46	27	10.66	28	14.7	96	290	1.292	4	143	11.97	2.375	3.776	72	1.242	4.5	0.857	0	0	25	70	96	4
115458	2	63	3	2	5034.745771	5233.76986	33	44	89	31	28	6.07	100	75	65.42	27	7.77	22	17.2	136	287	1.227	4	142	6.84	2.4	5.25	71	2.269	4	0.895	0	0	31	75	136	4
111535	2	64	1	2	59976.64337	66111.81639	33	41	61	46	24	3.57	102	113	55.69	40	6.16	28	15.9	175	285	1.227	4	143	5.13	2.275	2.948	81	0.869	3.9	0.78	NA	3	46	113	175	4
114926	2	61	1	2	35369.35468	37860.55315	33	43	77	28	23	6.43	99	94	70.72	32	4.44	54	23.3	172	277	1.098	3.6	138	13.68	2.4	5.689	75	1.513	6.7	1.196	0	0	28	94	172	3.6
114934	1	50	1	2	58084.47793	63266.24791	33	41	79	26	29	6.78	99	128	121.99	30	7.27	93	22.2	217	289	0.84	4	143	8.55	2.25	6.413	71	1.468	7.6	1.147	0	0	26	128	217	4
109991	1	50	1	2	205108.3464	231057.4296	33	40	39	25	30	5	102	225	84.86	27	5.5	21	20.1	158	282	0.872	4.2	141	23.94	2.2	4.603	67	1.208	7	1.01	1	1	25	225	158	4.2
111240	1	61	4	1	4439.95767	4592.972095	33	45	86	22	27	5	96	178	76.02	32	5.16	51	11.8	166	278	1.421	3.5	139	11.97	2.475	4.836	77	2.1	7.2	1.201	2	2	22	178	166	3.5
120107	1	55	4	1	20906.90804	21578.70121	33	45	84	23	28	5	99	196	76.02	30	5.72	47	11.3	188	282	0.969	3.9	141	5.13	2.275	6.284	75	7.745	6.2	0.793	0	0	23	196	188	3.9
111427	1	54	4	1	13576.37155	14847.12096	33	39	87	31	26	3.57	104	348	77.79	31	5.05	21	14	206	272	1.195	3.9	137	11.97	2.2	4.189	70	4.177	6	0.801	1	1	31	348	206	3.9
123569	1	72	3	1	9041.395957	9364.749774	33	41	81	22	25	5.36	102	171	66.3	27	9.1	22	18.8	145	288	0.872	3.7	142	6.84	2.3	3.905	68	1.773	5.3	1.426	NA	3	22	171	145	3.7
117006	2	64	2	1	7669.843611	7851.923205	33	39	116	35	28	6.07	102	193	107.85	31	5.22	28	9.5	196	286	1.195	4.2	143	3.42	2.3	3.439	70	0.881	7.5	0.922	NA	3	35	193	196	4.2
121078	1	64	2	1	3315.320806	3473.841637	33	41	52	23	30	7.5	100	192	137.9	24	6.55	32	15.4	145	285	1.259	3.7	141	10.26	2.5	3.879	65	1.908	5.9	1.176	2	2	23	192	145	3.7
117704	2	57	2	1	11945.95168	12111.59478	33	37	62	31	26	2.14	101	127	74.26	31	7.77	43	20.2	138	276	0.872	4	138	3.42	2.375	2.819	68	0.779	6.1	1.082	0	0	31	127	138	4
114745	1	58	1	1	77768.86605	82141.25542	33	42	80	29	27	6.07	100	230	87.52	35	6	49	27.9	127	278	1.227	4.1	138	23.94	2.375	3.905	77	1.389	6.1	1.054	0	0	29	230	127	4.1
119510	1	56	1	1	67395.86178	70387.46221	33	42	85	19	26	4.64	99	126	76.02	31	5.16	29	5.6	166	279	1.259	3.7	140	5.13	2.3	5.224	73	1.535	5.5	1.218	2	2	19	126	166	3.7
121249	1	77	4	2	16592.16133	17367.10073	32	39	61	30	24	6.78	101	77	103.43	29	6.55	32	21.5	144	277	0.807	3.8	137	10.26	2.35	4.526	68	0.779	5.4	0.893	0	0	30	77	144	3.8
113639	1	67	4	2	8401.101801	9235.682662	32	42	66	22	27	4.28	99	109	76.02	32	6	98	16.3	160	282	0.969	4	141	6.84	2.4	5.043	74	1.739	6.4	0.965	0	0	22	109	160	4
110608	1	60	4	2	4465.356781	4810.187467	32	40	118	23	24	7.5	98	282	90.17	36	17.65	92	20.6	208	287	0.807	3.5	136	6.84	2.3	4.577	76	2.156	5.1	1.239	1	1	23	282	208	3.5
110872	2	51	4	2	8679.588336	9063.274052	32	44	69	26	25	6.07	101	75	52.16	36	5.66	42	14.9	164	283	1.13	3.9	141	11.97	2.35	4.939	80	1.614	6.9	0.765	0	0	26	75	164	3.9
120003	1	53	2	2	14575.63767	15546.30339	32	32	60	16	27	2.86	104	180	99.89	26	5.22	43	24	145	281	1.162	4.6	142	6.84	2.075	4.215	58	1.152	4.1	1.25	0	0	16	180	145	4.6
112667	1	56	2	2	6426.725552	6845.781478	32	40	81	20	23	6.43	104	251	81.33	29	8.66	28	12.7	153	288	1.13	4.1	142	5.13	2.4	3.931	69	0.937	4.3	1.051	2	2	20	251	153	4.1
119660	1	53	1	2	67395.86178	70387.46221	32	41	70	23	25	5.71	102	100	103.43	25	6.99	30	19.9	NA	286	1.001	3.7	142	8.55	2.3	4.732	66	1.253	5.9	1.07	0	0	23	100	164	3.7
114320	2	55	1	2	121785.3501	135529.2445	32	42	97	24	26	4.64	105	201	57.46	33	4.33	29	26.7	220	284	1.227	3.8	143	6.84	2.35	4.293	75	3.884	4.6	1.403	1	1	24	201	220	3.8
111824	1	63	4	1	8854.871965	9387.643628	32	44	94	24	29	4.28	100	154	75.14	27	6.61	235	20.2	163	284	1.066	3.5	142	11.97	2.3	4.422	71	1.253	6.4	1.338	2	2	24	154	163	3.5
114251	1	60	4	1	11848.13103	12190.98786	32	40	82	30	24	7.5	99	331	86.63	31	5.22	25	7	162	275	1.195	3.9	136	3.42	2.25	6.491	71	4.381	6.3	0.879	2	2	30	331	162	3.9
119405	2	55	4	1	51357.66944	55581.56093	32	43	91	27	26	5.36	99	237	54.81	27	4.88	42	14.7	168	274	1.227	4.3	137	1.71	2.4	5.612	70	2.981	4.5	0.874	2	2	27	237	168	4.3
113921	2	55	4	1	9849.371354	10707.02784	32	41	66	37	25	8.21	97	1811	60.11	38	5.5	19	11.8	389	281	1.227	3.6	139	1.71	2.425	6.801	79	1.818	6.3	0.873	2	2	37	1811	389	3.6
109300	2	54	4	1	20550.01905	23643.30481	32	42	84	24	26	5.36	106	152	51.27	31	5.27	74	14.7	218	286	1.066	4.1	143	5.13	2.25	5.12	73	0.711	4.7	0.72	2	2	24	152	218	4.1
118986	1	51	4	1	9381.357273	10614.4229	32	43	93	24	27	8.57	101	183	74.26	34	6.49	114	21.5	187	288	1.066	4.4	142	10.26	2.45	5.172	77	1.039	6.8	0.869	0	0	24	183	187	4.4
115955	2	53	3	1	19543.75401	18942.92014	32	44	116	29	23	3.21	104	188	50.39	35	4.72	97	11.6	174	287	0.904	3.8	145	10.26	2.375	3.595	79	1.084	5.8	1.155	2	2	29	188	174	3.8
113776	1	53	3	1	26464.98666	28249.1281	32	38	81	24	29	5.71	102	181	87.52	24	5.5	26	19.2	271	284	1.13	4	142	3.42	2.15	6.129	62	5.848	6.4	1.314	2	2	24	181	271	4
110434	1	53	3	1	11399.393	11894.34188	32	40	67	21	28	5	99	710	69.84	21	8.6	28	16.7	152	281	1.001	4.4	139	6.84	2.325	4.448	61	2.393	8	1.21	1	1	21	710	152	4.4
116608	2	74	1	1	52105.87012	54382.50829	32	41	35	37	28	5.71	99	152	81.33	33	5.61	29	10.4	169	283	1.292	4.6	141	6.84	2.4	3.284	74	2.902	7.5	1.117	2	2	37	152	169	4.6
110544	1	61	1	1	17868.91333	20160.76955	32	41	100	25	26	5	100	133	90.17	34	3.28	51	14.9	151	276	1.292	4.2	139	6.84	2.4	5.586	75	4.121	5.9	0.98	0	0	25	133	151	4.2
115988	2	57	1	1	95286.07423	110764.143	32	38	51	24	24	4.28	100	120	68.95	27	5.55	56	23.5	169	274	1.098	4.7	137	8.55	2.225	4.629	65	1.377	3.1	1.153	2	2	24	120	169	4.7
112331	1	56	1	1	164753.3201	176466.1469	32	44	57	19	28	3.21	101	173	68.07	25	11.27	12	13.8	119	282	1.098	3.8	139	8.55	2.325	2.922	69	0.926	3	1.013	2	2	19	173	119	3.8
118216	2	55	1	1	38498.98383	41058.18255	32	46	56	23	28	5	99	85	60.11	29	5.55	36	18.4	137	278	1.001	4.3	139	5.13	2.475	5.431	75	2.439	5.6	1.04	2	2	23	85	137	4.3
116819	1	51	1	1	9712.565807	10805.64941	32	43	80	21	24	6.43	99	105	89.28	30	5.33	62	12.9	129	281	1.324	4.2	140	5.13	2.425	4.5	73	0.96	5.9	1.078	2	2	21	105	129	4.2
109496	1	50	1	1	163443.9521	189197.4043	32	36	113	25	24	5	105	178	86.63	36	5.66	40	13.1	145	284	0.84	4.1	142	8.55	2.2	3.827	72	0.745	5.8	0.881	2	2	25	178	145	4.1
110613	1	53	4	2	3526.336357	3901.337661	31	43	62	30	24	8.57	102	308	81.33	30	5.61	26	9.5	179	285	1.292	3.8	141	8.55	2.175	5.431	73	1.829	4	0.866	0	0	30	308	179	3.8
111754	2	66	3	2	14377.96311	15471.13068	31	40	95	20	25	3.93	100	85	44.2	30	6.61	153	18.4	159	282	1.227	4	141	17.1	2.35	4.422	70	1.118	3.4	0.832	1	1	20	85	159	4
123290	2	65	3	2	6957.48366	7348.210706	31	41	106	42	26	3.93	100	211	73.37	30	4.72	25	10.4	231	280	1.292	4.6	141	5.13	2.3	3.827	71	1.185	6.9	0.899	1	1	42	211	231	4.6
118396	2	57	3	2	10932.7463	10962.81985	31	40	131	30	29	3.21	103	87	45.97	34	5.5	32	17.7	183	284	1.098	4	143	6.84	2.275	6.206	74	3.037	4.9	0.793	NA	3	30	87	183	4
122930	1	77	2	2	3360.373085	3437.898257	31	42	62	31	27	4.28	100	369	86.63	36	4.88	14	14.3	215	277	1.259	4.5	139	8.55	2.325	4.422	78	0.497	5.8	1.56	2	2	31	369	215	4.5
112944	1	60	2	2	10520.62976	11451.77682	31	40	70	24	27	5.36	102	184	84.86	28	7.44	66	16.3	118	284	1.066	3.8	141	6.84	2.325	4.939	68	7.971	6.2	0.953	0	0	24	184	118	3.8
115288	2	56	2	2	8836.722094	9209.233542	31	44	71	56	31	6.07	100	730	121.11	29	4.27	16	12.4	214	282	1.13	4.2	141	6.84	2.5	4.784	73	1.152	6.6	0.835	0	0	56	730	214	4.2
110950	1	57	1	2	14530.82522	15251.89927	31	41	92	28	25	5.71	95	249	69.84	32	5.5	81	27.6	164	271	1.066	4.4	135	8.55	2.4	4.138	73	1.456	4.6	0.873	0	0	28	249	164	4.4
109908	1	80	1	2	19219.1572	24373.15799	31	49	85	43	21	10.71	98	73	118.46	33	5.83	84	18.8	187	286	0.969	4.8	140	18.81	2.425	4.681	82	0.903	5.2	0.87	2	2	43	73	187	4.8
121373	1	76	4	1	22199.81423	23467.58718	31	48	99	23	26	3.57	93	80	56.58	30	15.21	48	14.1	173	281	1.098	3.5	136	32.49	2.5	2.896	78	3.726	5.4	1.087	1	1	23	80	173	3.5
111054	1	64	4	1	4513.387605	4620.717514	31	40	77	40	26	6.07	101	93	89.28	30	4.83	71	11.8	128	278	0.969	3.7	139	5.13	2.275	5.689	70	3.895	5.6	1.041	2	2	40	93	128	3.7
119618	1	61	4	1	5938.587561	6492.525401	31	43	78	20	27	7.14	101	124	78.68	31	11.21	56	24	140	286	0.84	3.9	139	13.68	2.4	4.319	74	3.85	7.1	1.049	0	0	20	124	140	3.9
109686	1	60	4	1	10392.50602	11319.46109	31	43	75	30	22	4.28	103	209	71.6	31	5.22	24	15.9	157	277	0.775	4	139	5.13	2.4	4.784	74	2.01	6.3	1.1	0	0	30	209	157	4
115850	2	56	4	1	32734.19653	32712.17618	31	40	147	27	27	4.28	98	52	45.08	36	16.49	16	16.5	164	292	1.13	4.6	141	6.84	2.525	4.888	76	2.935	3.8	0.924	2	2	27	52	164	4.6
114636	1	50	4	1	19068.54502	19859.59653	31	40	51	25	27	5.71	99	206	90.17	27	5	33	13.3	155	275	1.195	3.8	137	11.97	2.25	4.81	67	1.795	7.1	1.177	0	0	25	206	155	3.8
111355	2	62	3	1	7528.047496	8106.310201	31	43	120	31	25	4.28	100	106	45.08	32	4.33	14	10	224	280	1.098	4.5	141	3.42	2.325	3.982	75	1.581	5.1	0.881	NA	3	31	106	224	4.5
113049	2	58	3	1	7922.030398	8112.578303	31	42	126	18	26	5	96	75	42.43	31	16.93	29	14.1	164	286	1.259	4	137	10.26	2.375	5.922	73	1.569	2.8	0.94	0	0	18	75	164	4
118207	2	80	2	1	8497.357499	9435.661936	31	41	86	24	30	7.85	99	89	77.79	29	5.05	40	15.4	176	286	1.259	4	142	6.84	2.45	5.405	70	0.881	7	1.441	NA	3	24	89	176	4
114371	1	80	1	1	14855.00701	19284.81049	31	45	103	31	30	7.85	97	213	84.86	26	4.77	22	17.4	206	278	0.904	4.4	138	6.84	2.425	4.681	71	2.077	6.1	0.964	1	1	31	213	206	4.4
121872	1	67	1	1	110847.9199	120674.1245	31	40	95	23	26	8.21	102	64	84.86	26	10.66	29	17	154	298	1.324	4.4	145	8.55	2.5	3.517	66	2.811	3.9	1.13	2	2	23	64	154	4.4
119017	1	65	1	1	120369.9197	123173.1151	31	43	72	20	26	8.21	97	58	98.12	24	9.38	17	10.6	226	283	1.001	4.4	138	5.13	2.35	5.198	67	3.082	5.2	1.063	1	1	20	58	226	4.4
110506	1	65	1	1	62804.79543	69296.82517	31	45	59	29	29	9.64	100	108	149.4	19	5.33	24	15.9	132	286	1.001	4.4	141	5.13	2.3	3.776	64	1.502	5.6	0.974	2	2	29	108	132	4.4
122153	1	63	1	1	154867.3854	164782.9929	31	43	44	24	30	6.07	102	171	106.96	27	6.77	19	14	200	293	1.227	4	146	13.68	2.325	2.845	70	1.174	5.7	1.066	2	2	24	171	200	4
121415	2	60	1	1	24801.98381	23371.66973	31	41	112	60	26	6.78	96	993	58.34	33	5	11	19.2	200	279	0.969	3.6	139	10.26	2.25	5.974	74	0.994	3.6	0.78	0	0	60	993	200	3.6
110518	2	57	1	1	70993.82947	71981.05794	31	44	84	32	28	4.28	99	93	55.69	27	5.11	33	13.4	183	281	1.13	3.8	141	6.84	2.45	6.051	71	0.971	4.6	0.97	2	2	32	93	183	3.8
122396	1	53	1	1	153747.7919	167406.0034	31	36	81	17	29	8.21	97	83	68.95	33	4.72	21	10.2	189	279	1.066	4.6	138	3.42	2.275	4.086	69	0.813	4.6	0.823	2	2	17	83	189	4.6
111994	1	63	4	2	7000.352196	7403.786312	30	40	79	24	28	4.64	103	51	90.17	27	4.88	93	21	142	286	1.195	4.5	144	20.52	2.25	4.577	67	1.118	7	1.09	0	0	24	51	142	4.5
120899	2	60	4	2	13625.88779	14895.43421	30	40	95	23	23	4.64	104	70	48.62	33	5.44	147	22.7	130	287	1.162	4.2	144	6.84	2.3	5.586	73	1.355	4.6	0.944	2	2	23	70	130	4.2
121395	2	54	3	2	20675.1172	21791.98486	30	38	118	26	29	4.64	100	64	62.76	32	4.61	53	9.9	190	281	1.001	4	141	5.13	2.325	5.275	70	1.05	4.7	0.98	0	0	26	64	190	4
122539	2	52	3	2	18092.89523	17862.12555	30	38	115	26	26	9.28	104	55	78.68	35	4.61	14	9	191	293	1.292	4.4	145	3.42	2.425	8.172	73	1.219	5.9	0.901	1	1	26	55	191	4.4
122193	2	54	2	2	14701.32233	15527.33152	30	43	41	29	27	6.78	100	213	63.65	31	6.38	21	10.7	189	283	1.227	3.4	140	5.13	2.4	5.12	74	0.7	5.2	0.897	1	1	29	213	189	3.4
121123	2	53	2	2	4605.061837	4706.498486	30	37	97	31	26	6.43	102	56	81.33	35	5.5	31	12.4	157	281	1.001	3.9	140	5.13	2.175	4.81	72	1.084	9	1.17	2	2	31	56	157	3.9
123568	2	68	2	2	5356.283555	5830.448817	30	46	129	36	26	5.36	100	222	76.91	51	4.94	80	20.4	250	282	1.066	3.7	141	6.84	2.65	6.413	97	0.779	4.9	1.145	2	2	36	222	250	3.7
119447	1	64	2	2	7813.179369	8086.894594	30	40	134	20	24	8.93	103	138	104.31	30	5.11	20	15	118	293	1.098	3.9	145	6.84	2.4	3.233	70	0.745	6.4	0.985	1	1	20	138	118	3.9
120832	1	60	2	2	6411.359539	6752.007637	30	40	67	27	26	5.71	100	378	99.89	29	5.66	23	18.6	NA	279	1.324	4.2	139	6.84	2.3	5.431	69	2.969	6.1	0.868	2	2	27	378	164	4.2
114173	1	55	1	2	47164.97643	52400.32899	30	41	54	19	24	6.78	101	108	91.05	28	5.88	93	17.7	160	280	0.904	4.3	139	6.84	2.225	6.672	69	1.118	6.7	1.34	NA	3	19	108	160	4.3
115592	1	60	1	2	79297.77323	89257.50685	30	40	67	22	24	5.36	100	234	71.6	27	4.83	42	22.2	147	276	1.033	3.9	138	11.97	2.3	4.732	67	0.994	5.5	0.998	2	2	22	234	147	3.9
118971	1	58	1	2	174153.0911	189624.0108	30	40	79	26	27	6.78	98	136	81.33	30	5.33	22	16.8	167	276	1.066	3.8	137	5.13	2.25	5.301	70	0.948	4.4	0.747	2	2	26	136	167	3.8
114989	1	56	1	2	59599.58914	62937.37811	30	44	58	24	26	5.36	105	228	81.33	21	5.66	18	24.7	150	284	1.033	4.5	142	17.1	2.325	3.439	65	1.129	5.6	1.16	0	0	24	228	150	4.5
118013	1	56	1	2	73818.37465	80260.32279	30	48	65	22	26	4.64	101	296	65.42	29	6.11	24	17.7	209	289	1.033	4	145	5.13	2.425	4.086	77	0.948	5.8	1.009	2	2	22	296	209	4
114799	1	63	3	1	5875.975794	6453.913546	30	41	101	28	26	3.21	102	127	64.53	33	5.5	17	12.5	159	284	1.066	3.8	143	5.13	2.275	5.922	74	3.308	6.4	0.933	0	0	28	127	159	3.8
116588	1	56	3	1	14589.42046	15474.56488	30	43	67	23	29	5.36	99	376	71.6	25	5.38	31	25.4	195	282	1.227	4.6	141	20.52	2.425	5.275	68	1.66	5.3	1.117	NA	3	23	376	195	4.6
124467	2	50	3	1	10932.7463	10962.81985	30	42	50	25	25	3.93	100	108	35.36	34	7.94	29	22	144	283	1.195	4	141	6.84	2.35	4.629	76	2.743	5.4	0.98	0	0	25	108	144	4
114162	1	68	2	1	4181.399922	4288.039507	30	43	99	21	21	4.64	107	197	110.5	36	7.72	63	18.6	152	291	1.162	4	145	8.55	2.4	3.491	79	1.411	6.2	1.344	0	0	21	197	152	4
114123	1	63	2	1	6292.263703	6749.924064	30	42	61	20	29	4.64	99	89	83.1	42	7.49	51	16.3	185	280	0.969	4.3	139	13.68	2.375	5.353	84	1.31	6	1.068	2	2	20	89	185	4.3
118471	1	61	2	1	9268.597833	9967.930215	30	39	106	22	26	5	104	50	72.49	26	4.94	52	13.3	285	289	1.001	3.9	145	3.42	2.3	6.103	65	0.655	6.5	0.752	NA	3	22	50	285	3.9
120122	1	80	1	1	16125.98552	18456.76959	30	43	77	24	28	6.43	100	288	90.17	26	6.05	20	14.1	175	284	0.969	4.1	141	20.52	2.35	2.948	69	1.513	7.6	1.302	1	1	24	288	175	4.1
112123	1	79	1	1	9231.335196	9662.052604	30	42	83	22	26	6.07	97	83	86.63	30	6.72	31	9.7	132	282	1.195	4.1	140	3.42	2.325	4.189	72	2.371	5.2	1.136	0	0	22	83	132	4.1
113175	2	71	1	1	212352.8286	231634.1328	30	40	101	28	24	5.71	101	56	64.53	21	5	30	22.4	120	276	1.13	3.9	138	17.1	2.275	5.224	61	1.095	4.4	0.783	2	2	28	56	120	3.9
119206	2	69	1	1	56916.94684	60083.09617	30	40	88	32	32	5.71	97	173	56.58	33	5.27	12	20.2	245	286	1.001	3.1	143	8.55	2.425	4.629	73	2.134	5.9	1.298	2	2	32	173	245	3.1
123754	1	69	1	1	45927.86105	49999.17389	30	43	65	20	22	3.57	105	103	87.52	25	6.44	84	23.6	120	283	0.775	4.2	142	11.97	2.3	4.189	68	1.411	7.5	1.108	2	2	20	103	120	4.2
115993	1	67	1	1	80582.44305	84523.68543	30	42	48	26	28	7.5	102	152	102.54	22	5.61	20	13.6	166	284	0.969	5	141	5.13	2.225	4.758	64	1.761	5.6	0.969	2	2	26	152	166	5
123070	1	53	1	1	108718.2141	127468.7104	30	40	74	24	24	3.21	101	81	81.33	31	5.44	36	29.6	136	282	0.904	4	142	13.68	2.375	6.336	71	1.479	7.8	1.065	2	2	24	81	136	4
119487	2	52	4	2	9544.432349	11074.16335	29	44	69	21	28	3.21	100	107	62.76	34	4.83	27	26	124	281	1.356	3.7	142	17.1	2.45	4.81	78	1.061	4.8	0.881	NA	3	21	107	124	3.7
116280	2	69	2	2	5353.146736	5513.011495	29	40	72	20	25	6.43	98	119	66.3	30	5.44	34	8.1	126	276	1.13	3.7	137	3.42	2.3	6.517	70	1.298	5.3	0.994	2	2	20	119	126	3.7
122878	1	65	2	2	4167.512695	4453.99209	29	41	80	35	28	5	99	266	106.96	33	5	48	13.3	155	278	0.936	3.7	139	6.84	2.375	5.094	74	1.05	6.6	1.068	0	0	35	266	155	3.7
114337	2	62	2	2	9553.343789	10056.79661	29	40	100	19	27	4.64	102	158	62.76	33	5	25	10.4	159	285	1.001	3.4	143	5.13	2.325	4.577	73	0.734	4.1	0.96	0	0	19	158	159	3.4
117666	2	67	1	2	16972.09827	18121.87381	29	34	74	45	24	7.5	98	161	113.15	41	13.54	59	25.4	159	283	0.84	4.3	136	11.97	2.375	5.87	75	3.59	4.9	1.113	0	0	45	161	159	4.3
123966	2	64	1	2	29778.06695	28060.78544	29	41	78	28	25	7.14	96	352	61	26	4.55	32	15.9	193	272	1.195	3.8	135	3.42	2.275	6.956	67	1.185	5.1	0.808	0	0	28	352	193	3.8
114941	2	59	1	2	47856.21117	49180.3297	29	39	79	22	24	4.28	102	125	68.07	32	5.05	23	11.3	196	279	1.066	4.1	140	6.84	2.3	4.707	71	1.377	5.9	0.977	2	2	22	125	196	4.1
116802	2	59	1	2	9317.357099	9914.387152	29	35	162	46	15	5.71	112	60	91.94	30	4.94	124	32.4	167	276	1.162	4.3	138	42.75	2.175	4.293	65	1.231	4.9	0.854	0	0	46	60	167	4.3
115210	1	66	4	1	3705.915	3969.88958	29	42	85	41	24	5.36	103	784	58.34	26	5.5	18	12	217	282	1.098	4.7	141	10.26	2.25	4.293	68	1.739	6.6	1.191	1	1	41	784	217	4.7
122960	2	62	4	1	7027.686778	7687.69832	29	41	55	20	27	5	102	151	56.58	28	5.11	16	17.6	186	285	1.066	3.7	143	11.97	2.275	4.163	69	1.581	7	0.971	NA	3	20	151	186	3.7
114650	1	62	4	1	10844.75036	11614.73544	29	44	80	23	27	6.07	103	219	97.24	26	6.88	42	12.7	138	284	1.098	4.3	141	10.26	2.35	6.103	70	4.414	9.3	1.259	NA	3	23	219	138	4.3
123033	2	60	4	1	10696.17345	11475.68951	29	47	36	29	27	5	102	171	47.74	34	5.77	19	18.6	197	289	1.033	3.8	145	8.55	2.45	3.051	81	1.208	4.7	1.012	0	0	29	171	197	3.8
118330	1	58	4	1	7836.120889	8234.41743	29	47	68	22	24	6.07	102	175	59.23	30	6	37	17.7	140	283	1.324	4.2	141	11.97	2.375	5.043	77	1.332	7.1	0.963	2	2	22	175	140	4.2
122881	2	56	4	1	8795.968816	9679.068119	29	41	112	21	27	5.36	101	28	48.62	36	9.94	20	7.5	113	288	1.388	4.2	142	5.13	2.325	4.81	77	1.423	4.1	0.861	0	0	21	28	113	4.2
120043	1	53	4	1	53534.35012	57545.08343	29	42	54	25	29	6.78	102	263	71.6	29	5.22	71	36.2	175	283	1.033	3.9	141	15.39	2.4	4.784	71	1.016	4.5	1.311	0	0	25	263	175	3.9
124817	2	67	3	1	7724.092682	8189.5722	29	37	53	19	21	4.28	100	122	42.43	37	4.5	56	17.6	220	276	0.969	3.5	139	8.55	2.2	5.25	74	1.264	2.9	0.893	1	1	19	122	220	3.5
114738	1	63	3	1	6393.759925	6876.541691	29	40	82	23	28	6.78	104	155	77.79	25	5.33	16	10.2	149	289	1.227	3.7	144	6.84	2.2	5.353	65	2.597	6.1	0.991	1	1	23	155	149	3.7
122099	1	57	2	1	7894.521565	8500.638335	29	44	73	40	23	3.21	96	202	58.34	35	5	59	26.3	174	272	1.098	3.8	137	10.26	2.35	6.62	79	0.576	6.3	1.281	0	0	40	202	174	3.8
117263	1	56	2	1	21349.04405	22048.46028	29	36	72	19	26	5.71	105	188	91.94	26	5.94	17	10.6	152	288	1.001	4.5	144	11.97	2.2	4.577	62	0.553	5	1.013	2	2	19	188	152	4.5
120500	2	55	2	1	10293.75535	10400.04216	29	35	85	34	29	7.14	104	1043	84.86	35	4.61	15	16.3	245	290	1.195	4	145	6.84	2.275	4.939	70	0.621	3.4	1.098	2	2	34	1043	245	4
117307	2	62	1	1	37022.22749	37728.12916	29	42	51	33	27	3.57	101	317	59.23	27	5.16	10	14.7	246	280	1.195	4	141	5.13	2.35	6.413	69	0.813	4.3	0.813	NA	3	33	317	246	4
110178	2	57	1	1	34410.77564	34563.83165	29	37	74	18	28	6.07	103	89	72.49	26	5.61	24	17.4	152	285	1.259	4	142	5.13	2.2	5.172	63	2.055	4.6	1.152	2	2	18	89	152	4
113649	1	55	1	1	112513.39	118103.691	29	37	69	15	21	7.85	100	68	74.26	29	15.15	41	11.6	138	283	0.904	4.5	135	5.13	2.225	3.258	66	3.895	4.5	1.169	2	2	15	68	138	4.5
122977	1	53	1	1	98086.1212	109776.3182	29	43	113	33	29	6.78	101	208	91.05	27	5.11	234	11.3	166	281	1.421	3.9	140	11.97	2.425	6.336	70	1.637	5.7	1.051	2	2	33	208	166	3.9
123332	2	61	4	2	8678.194462	9165.555332	28	28	83	25	24	15.71	106	139	193.6	37	5.11	12	6.1	191	300	1.292	4.7	145	1.71	2.2	4.732	65	1.931	7.8	0.972	NA	3	25	139	191	4.7
112399	2	78	4	2	16985.14542	18661.02418	28	36	98	19	27	5.71	97	211	64.53	44	5.72	21	8.6	267	281	1.13	3.9	140	5.13	2.35	5.146	80	1.073	4.3	0.638	2	2	19	211	267	3.9
116120	2	71	4	2	8501.802286	9208.830893	28	39	81	28	24	3.57	108	393	54.81	27	5.66	17	14.1	204	288	0.872	3.9	145	6.84	2.175	4.577	66	2.732	3.1	0.754	0	0	28	393	204	3.9
122168	1	62	4	2	9487.491285	9704.397282	28	42	117	15	26	7.14	92	261	77.79	30	15.76	46	24.9	172	277	1.421	4.5	132	10.26	2.325	3.388	72	1.332	2.8	0.943	2	2	15	261	172	4.5
111329	1	57	4	2	9389.659797	9875.775721	28	40	31	NA	26	10	98	98	95.47	32	7.16	56	14.5	228	285	1.001	4.8	139	6.84	2.275	5.689	72	14.338	7	1.017	2	2	22	98	228	4.8
124547	1	75	3	2	18290.58666	19272.00649	28	41	67	22	27	7.14	97	78	102.54	28	5.11	27	18.8	211	276	1.066	4	137	5.13	2.35	5.844	69	2.811	8.2	1.796	2	2	22	78	211	4
111452	1	62	3	2	5044.987285	5410.092842	28	39	205	29	23	8.21	102	123	88.4	36	5.11	47	13.6	181	277	1.162	4.1	137	5.13	2.225	5.741	75	1.84	5.6	0.743	1	1	29	123	181	4.1
121315	1	53	3	2	9513.37121	9728.667337	28	42	93	28	26	6.07	101	316	97.24	33	6.33	23	23.8	160	286	1.033	5	142	8.55	2.35	6.517	75	3.41	7.7	1.016	0	0	28	316	160	5
121905	1	63	2	2	4116.317466	4237.70057	28	40	86	21	24	5.71	103	245	91.94	32	4.94	41	13.1	164	280	1.098	4.2	140	5.13	2.3	5.715	72	1.479	6.2	1.496	0	0	21	245	164	4.2
120420	1	54	1	2	51129.49204	56560.32694	28	41	61	24	23	5.71	104	155	70.72	29	6	18	14.1	149	277	1.098	4.4	138	5.13	2.175	3.103	70	0.61	4.5	1.138	2	2	24	155	149	4.4
114423	2	63	4	1	9158.796411	10012.13657	28	39	44	27	26	5	101	186	64.53	34	7.99	18	17	157	284	1.356	3.9	141	8.55	2.3	4.396	73	1.66	6	0.842	2	2	27	186	157	3.9
113430	1	63	4	1	4063.3185	4171.275536	28	44	102	27	25	6.07	99	182	75.14	28	7.16	45	17.6	163	273	0.969	3.9	135	6.84	2.25	4.319	72	1.242	5.1	0.913	2	2	27	182	163	3.9
116522	1	59	4	1	13861.05268	15367.38628	28	39	106	21	24	5.36	103	189	90.17	30	4.94	40	12.9	129	278	0.904	4.1	139	5.13	2.275	7.422	69	2.066	6.4	1.305	2	2	21	189	129	4.1
121460	2	58	4	1	7487.309472	8102.459482	28	35	145	22	28	4.64	100	75	50.39	33	20.26	58	15.4	162	294	1.388	4	140	3.42	2.25	5.431	68	4.245	3.9	0.947	0	0	22	75	162	4
121274	1	58	4	1	18152.23627	20681.71743	28	38	92	24	27	4.64	105	64	73.37	29	5.16	26	13.3	162	285	1.033	4.4	143	5.13	2.3	4.577	67	1.784	6.5	1.285	NA	3	24	64	162	4.4
115249	2	57	4	1	47710.33155	46243.57225	28	42	128	25	27	8.57	104	294	60.11	30	5	34	12.9	227	290	1.13	4.1	144	5.13	2.425	4.681	72	1.445	5.2	0.879	2	2	25	294	227	4.1
119461	1	53	4	1	5440.804629	5843.512837	28	44	115	19	27	3.21	100	130	71.6	36	5.22	26	26	174	280	1.001	4.2	141	13.68	2.325	3.258	80	2.439	4.8	1.224	2	2	19	130	174	4.2
109593	1	52	4	1	37130.74632	39073.24594	28	40	81	26	25	5	99	141	64.53	39	4.77	30	40.3	153	275	1.098	4.1	138	13.68	2.225	3.672	79	1.061	6.1	1.065	0	0	26	141	153	4.1
113542	1	52	4	1	14608.23626	15028.74818	28	39	106	19	25	5	100	218	85.75	34	4.77	57	10.4	168	277	1.356	3.7	139	3.42	2.35	8.146	73	2.947	4.8	0.679	0	0	19	218	168	3.7
119434	1	75	3	1	8691.030138	9722.899966	28	46	85	28	26	5	97	394	71.6	27	5.72	42	15.8	147	280	1.162	4.2	140	17.1	2.425	6.698	73	3.997	5.7	0.969	2	2	28	394	147	4.2
116254	1	62	3	1	7663.620586	8210.383002	28	40	91	27	28	5.71	100	171	68.95	33	5.38	15	15.2	157	279	1.259	4	139	11.97	2.25	4.215	73	2.089	6.7	0.822	0	0	27	171	157	4
117219	2	61	3	1	19305.51973	20468.93457	28	37	100	19	27	3.57	105	248	52.16	32	5	24	23.3	216	287	1.066	4	145	6.84	2.25	6.465	69	1.592	5.9	0.84	1	1	19	248	216	4
112620	2	56	3	1	19317.32809	19918.25487	28	39	81	25	30	5.71	102	243	56.58	38	5.27	22	15.9	228	288	1.292	4	144	8.55	2.3	5.327	77	2.111	4.5	0.937	NA	3	25	243	228	4
120432	1	55	3	1	16391.05365	16508.10416	28	43	99	21	21	7.14	102	99	94.59	25	5.55	16	13.8	169	286	0.936	4.6	142	5.13	2.325	3.491	68	2.348	4.2	1.005	2	2	21	99	169	4.6
122569	2	54	3	1	9075.658371	9716.718567	28	40	72	17	29	3.93	103	68	52.16	28	6.16	28	16.5	113	285	1.292	4	143	8.55	2.275	5.224	68	2.111	5.1	1.085	0	0	17	68	113	4
113973	2	62	2	1	12714.28583	13614.71902	28	38	130	42	28	3.21	102	162	63.65	40	5.55	46	13.8	171	274	1.292	3.6	138	6.84	2.325	4.241	78	1.761	4.1	0.727	NA	3	42	162	171	3.6
117009	2	55	2	1	12695.88603	13128.86134	28	38	52	24	27	3.21	100	489	84.86	34	4.94	70	8.2	153	278	1.259	3.9	140	5.13	2.325	5.379	72	1.694	6.7	1.304	NA	3	24	489	153	3.9
109474	2	80	1	1	14670.5782	17761.19216	28	42	89	33	25	12.85	107	216	69.84	26	6.99	26	22.2	183	295	1.033	4.4	143	8.55	2.225	3.827	68	1.829	3.7	0.931	NA	3	33	216	183	4.4
111550	2	76	1	1	22105.60062	24204.59587	28	43	67	20	26	7.5	102	60	70.72	29	5.27	26	17.6	155	290	1.453	4.3	144	10.26	2.325	4.422	72	2.45	5.2	1.04	NA	3	20	60	155	4.3
119272	1	69	1	1	74454.67587	80235.0877	28	38	47	27	27	4.64	99	326	106.96	28	6.05	25	15.4	168	275	1.001	4.5	137	10.26	2.275	5.224	66	0.621	6.9	1.1	2	2	27	326	168	4.5
116710	1	67	1	1	25028.94523	26919.73279	28	40	101	27	25	5	106	320	139.67	28	6.55	29	10.4	166	290	1.324	4.6	145	5.13	2.3	3.103	68	3.161	6.4	1.125	0	0	27	320	166	4.6
119297	2	65	1	1	28435.73409	27806.2007	28	41	88	23	30	4.28	97	104	55.69	31	7.05	24	25.1	152	279	1.13	3.8	139	13.68	2.325	5.172	72	1.468	4.8	0.877	NA	3	23	104	152	3.8
114924	2	64	1	1	22742.0339	22244.18912	28	42	96	24	26	5	101	139	78.68	30	5.5	19	14	160	287	1.356	3.9	144	10.26	2.3	4.293	72	1.016	4.3	1.063	NA	3	24	139	160	3.9
117589	2	59	1	1	118696.3004	129195.498	28	45	81	27	26	3.57	99	139	68.95	30	4.83	34	17.9	181	274	1.098	4.1	138	8.55	2.325	7.086	75	1.355	4.9	0.746	NA	3	27	139	181	4.1
116783	1	65	4	2	6105.574254	6555.857536	27	39	73	53	29	6.07	102	1023	100.78	41	4.55	9	13.8	299	284	0.969	4.9	142	5.13	2.275	7.086	80	1.603	5.6	1.031	1	1	53	1023	299	4.9
118692	1	65	2	2	4386.172155	4539.830741	27	41	69	26	27	6.43	102	530	100.78	30	6.44	42	12.5	196	286	1.162	4	142	8.55	2.325	3.284	71	2.393	8	1.198	0	0	26	530	196	4
114862	1	64	2	2	6182.929248	6632.977112	27	39	87	21	24	4.64	105	187	108.73	34	7.77	18	11.8	147	287	1.066	4.3	143	3.42	2.325	4.784	73	1.705	4.7	0.966	0	0	21	187	147	4.3
123429	2	80	1	2	11107.58219	12419.75436	27	43	120	33	25	3.93	101	51	61	23	5.88	45	16.8	165	281	1.195	4.5	141	6.84	2.475	4.474	66	0.869	4.1	0.935	2	2	33	51	165	4.5
120904	1	63	1	2	21781.28929	22471.54447	27	37	89	27	21	3.21	98	184	71.6	32	10.77	159	12.4	141	276	0.71	3.6	136	6.84	2.275	4.474	69	2.698	5.6	1.308	0	0	27	184	141	3.6
114353	1	59	1	2	41808.74056	46734.36123	27	42	86	17	26	4.28	99	47	102.54	32	6.05	47	17.4	118	282	1.162	3.9	141	6.84	2.375	7.965	74	4.2	5.1	0.914	2	2	17	47	118	3.9
118985	1	54	1	2	108982.2302	120992.7715	27	41	79	29	24	7.85	102	257	91.94	33	5.72	20	10.2	212	283	0.936	4.1	140	8.55	2.225	5.844	74	0.881	4.5	0.988	0	0	29	257	212	4.1
113136	2	52	1	2	37354.60046	39719.31571	27	42	74	23	28	5	98	126	66.3	31	6.83	31	21.1	173	283	1.324	4.2	141	20.52	2.425	6.698	73	2.71	6.7	1.114	0	0	23	126	173	4.2
114269	2	75	4	1	15550.84726	16752.00238	27	43	48	29	26	7.14	100	223	66.3	30	5.22	127	16.8	227	280	1.421	4.4	139	8.55	2.525	5.715	73	3.24	5.3	1.104	2	2	29	223	227	4.4
121204	2	70	4	1	22190.95888	24937.81786	27	36	60	39	26	7.85	102	33	71.6	32	4.66	67	13.8	505	284	0.872	4	141	6.84	2.275	6.413	68	1.039	5.1	0.8	2	2	39	33	505	4
109486	1	65	4	1	7015.868851	7506.572056	27	43	97	22	24	5.36	102	130	70.72	25	5.33	21	25.3	133	282	1.162	3.9	141	13.68	2.375	4.577	68	3.082	3.7	1.144	2	2	22	130	133	3.9
117912	2	64	4	1	13773.30551	14995.58834	27	42	80	26	29	4.64	101	154	50.39	31	8.66	43	13.3	169	290	1.388	4.5	144	5.13	2.45	5.715	73	6.085	5.1	0.85	0	0	26	154	169	4.5
124429	2	62	4	1	9718.479483	10106.47533	27	45	78	25	19	6.43	100	102	69.84	34	5.27	25	12.9	181	279	1.033	3.7	139	8.55	2.375	6.206	79	1.569	5.2	0.831	2	2	25	102	181	3.7
124007	1	61	4	1	9235.034983	9562.756314	27	41	56	20	24	6.43	102	109	99.89	34	5.22	27	16.8	110	279	1.227	4	139	5.13	2.3	5.819	75	2.687	5.5	0.922	2	2	20	109	110	4
119561	1	59	4	1	91763.58366	101894.6923	27	42	53	52	22	4.64	101	102	68.95	24	4.94	32	15.6	103	273	1.324	4.2	137	22.23	2.325	4.189	66	3.522	6.4	1.121	2	2	52	102	103	4.2
120817	1	59	4	1	10729.9321	10839.91487	27	42	59	30	28	4.28	101	86	72.49	27	6.11	47	22	144	280	1.066	4	140	17.1	2.35	5.353	69	1.174	5.1	1.116	0	0	30	86	144	4
118947	2	58	4	1	8735.997883	9498.517486	27	40	51	20	29	4.64	101	50	67.18	34	5	14	11.6	164	285	1.356	4.5	143	6.84	2.25	3.491	74	0.903	4.3	0.858	1	1	20	50	164	4.5
119746	1	58	4	1	24189.29924	26911.03054	27	42	81	22	26	6.07	105	428	87.52	29	6	22	16.7	192	289	0.904	4.5	144	8.55	2.325	5.12	71	1.581	5.4	0.904	NA	3	22	428	192	4.5
114527	2	55	4	1	24536.71185	26723.77227	27	50	90	24	19	5.71	101	111	57.46	28	5	20	18.8	133	280	1.227	4.4	140	8.55	2.475	6.284	78	1.231	4.5	0.735	2	2	24	111	133	4.4
110715	1	55	4	1	5581.381111	6069.84143	27	39	40	23	30	5	102	120	79.56	31	4.66	21	25.4	63	285	1.066	4.6	143	11.97	2.275	4.732	70	0.948	5.6	0.96	2	2	23	120	63	4.6
110387	1	54	4	1	9119.01838	9804.242201	27	41	90	21	25	8.93	99	203	104.31	34	5.11	33	12.4	176	283	1.033	4.4	140	3.42	2.325	4.163	75	2.552	6.8	1.313	2	2	21	203	176	4.4
120279	2	52	4	1	11129.50856	12293.31454	27	42	79	24	26	6.78	103	204	67.18	30	4.72	127	7.7	214	286	1.162	3.7	143	5.13	2.3	5.275	72	1.05	4.6	0.873	2	2	24	204	214	3.7
110706	1	51	4	1	30024.55548	32895.26924	27	47	53	23	26	5.36	98	156	88.4	24	4.44	21	15	127	275	1.13	4.4	138	6.84	2.425	5.508	71	2.427	5.2	0.789	0	0	23	156	127	4.4
117518	1	50	4	1	19364.4946	20940.23392	27	42	99	19	27	5	103	120	63.65	36	5.44	30	17.9	197	289	1.13	3.7	145	5.13	2.425	4.448	78	1.705	7	1.002	NA	3	19	120	197	3.7
118254	2	63	3	1	23886.33541	25459.79696	27	41	107	21	25	5.36	102	64	62.76	27	5.33	18	12.9	137	282	1.13	3.8	141	10.26	2.375	5.767	68	1.648	4.4	0.879	2	2	21	64	137	3.8
117806	1	62	3	1	5769.195427	6061.95032	27	37	72	23	23	6.78	106	244	78.68	38	6	46	10.6	133	286	1.259	4.3	142	3.42	2.225	4.396	75	2.292	6.1	1.259	2	2	23	244	133	4.3
113179	2	55	3	1	14417.10945	15741.7115	27	40	131	20	22	4.64	104	83	50.39	31	5.83	29	27.9	143	282	1.356	3.8	141	6.84	2.475	4.034	71	2.021	4.8	0.981	NA	3	20	83	143	3.8
123254	1	53	3	1	16075.81721	16695.46407	27	45	77	20	29	5.36	100	179	61.88	33	8.83	33	19.9	163	285	1.13	4.4	141	15.39	2.3	4.888	78	2.529	3.7	1.063	NA	3	20	179	163	4.4
122219	1	50	3	1	13327.86515	13919.02742	27	44	101	22	25	6.07	99	158	66.3	27	7.16	100	14	NA	281	1.13	4.1	139	3.42	2.25	7.887	71	15.591	5.5	0.971	0	0	22	158	164	4.1
119019	1	50	3	1	9664.652013	10548.49477	27	41	89	22	29	5.71	98	180	93.7	40	5.11	28	19	157	282	1.098	3.9	141	6.84	2.35	6.077	81	4.866	5.8	0.853	0	0	22	180	157	3.9
109812	2	72	2	1	7614.851472	8564.919715	27	36	81	23	27	5.71	101	106	77.79	32	5.05	26	18.1	148	282	1.13	4	141	3.42	2.475	5.715	68	1.705	5.1	0.762	2	2	23	106	148	4
122037	1	68	2	1	8766.116433	9462.756115	27	37	77	21	23	7.14	100	179	103.43	37	11.82	22	11.6	150	283	1.292	4.1	137	15.39	2.25	4.965	74	1.479	8.3	1.017	2	2	21	179	150	4.1
110588	2	65	2	1	8827.33652	9505.920276	27	43	83	22	27	7.5	100	207	84.86	35	5.72	45	11.6	166	284	1.195	4.3	141	6.84	2.45	7.499	78	0.994	5.6	1.157	2	2	22	207	166	4.3
117440	1	61	2	1	3140.356692	3234.148553	27	41	86	27	26	5	105	275	80.44	33	5.33	51	16.8	205	287	1.001	3.6	144	6.84	2.35	4.551	74	1.084	7.1	1.255	0	0	27	275	205	3.6
110524	1	58	2	1	10360.45707	11122.33503	27	42	97	25	24	4.64	102	309	94.59	30	3.66	94	22.2	156	280	0.969	3.2	141	18.81	2.325	3.595	72	2.823	5.4	1.55	1	1	25	309	156	3.2
121360	1	58	2	1	5588.457002	5728.329541	27	38	103	29	28	5.36	100	343	105.2	28	5.5	30	12.2	206	282	1.13	4	141	13.68	2.275	4.5	66	1.129	7.6	1.54	2	2	29	343	206	4
109395	1	56	2	1	13483.83864	13879.61854	27	43	48	23	26	6.07	101	275	96.36	29	5.5	22	20.8	148	279	1.227	4	139	17.1	2.35	5.689	72	0.824	5.3	1.054	2	2	23	275	148	4
111075	1	51	2	1	7874.587226	8487.284152	27	44	49	31	27	5.36	101	543	83.1	28	5.66	28	22.9	166	277	1.162	4	138	5.13	2.4	4.655	72	0.373	4.6	1.228	0	0	31	543	166	4
114831	1	50	2	1	17021.39595	18403.50217	27	44	51	27	29	4.64	100	592	79.56	27	4	22	11.5	223	278	1.13	3.3	140	10.26	2.3	4.215	71	0.881	6.8	1.519	NA	3	27	592	223	3.3
119361	1	72	1	1	6428.626416	6667.792986	27	44	109	19	27	8.93	94	55	107.85	30	18.1	49	18.6	138	289	1.098	4.1	136	15.39	2.3	2.896	74	4.2	6.3	0.941	0	0	19	55	138	4.1
113684	1	71	1	1	7783.620038	8803.504794	27	40	64	21	26	5.71	95	284	95.47	33	7.88	39	15.8	179	276	0.904	4.5	136	6.84	2.3	5.25	73	1.603	7.7	1.45	1	1	21	284	179	4.5
112510	2	68	1	1	24440.03759	27069.03325	27	42	66	25	25	3.93	101	76	58.34	31	5.11	40	20.2	154	277	1.292	4.1	139	8.55	2.45	4.138	73	1.558	7.2	1.222	0	0	25	76	154	4.1
115816	1	66	1	1	29832.6303	33317.42789	27	45	57	23	29	6.43	100	124	95.47	24	5.22	19	12.4	201	281	1.388	4.1	140	5.13	2.225	4.526	69	1.773	6.1	0.866	2	2	23	124	201	4.1
110628	2	63	1	1	96335.72528	101008.3942	27	41	71	29	25	6.07	103	113	83.1	26	5.27	26	16.7	172	284	0.84	4.6	142	5.13	2.5	5.508	67	1.4	5	0.685	2	2	29	113	172	4.6
116268	2	56	1	1	46292.17422	47603.08631	27	40	100	14	26	3.93	104	52	69.84	26	5.16	74	21.3	136	286	1.292	4.1	144	11.97	2.2	4.913	66	1.761	5.1	0.996	1	1	14	52	136	4.1
123677	1	51	1	1	9854.42764	10628.56832	27	43	100	23	25	2.86	94	131	61.88	35	4.33	74	16.3	136	267	1.162	4.1	135	3.42	2.4	5.482	78	2.743	4.2	1.009	0	0	23	131	136	4.1
122791	2	52	4	2	21737.15964	23403.16711	26	36	133	32	25	4.28	103	89	65.42	35	5.5	95	9.1	170	287	1.259	4.6	144	3.42	2.225	4.474	71	1.14	5.1	0.914	2	2	32	89	170	4.6
119350	2	56	3	2	13842.53376	14532.87635	26	35	118	37	24	4.28	101	61	90.17	41	5.11	57	3.9	174	283	1.001	4	142	5.13	2.25	4.008	76	1.039	5.6	1.043	1	1	37	61	174	4
122720	2	54	3	2	9836.849507	10692.06335	26	38	80	24	23	5.36	102	329	51.27	35	5.44	13	14.5	138	278	0.936	4.6	139	3.42	2.225	6.258	73	2.089	5.6	0.77	0	0	24	329	138	4.6
123571	1	54	3	2	30492.40826	30682.62025	26	43	94	20	29	4.28	101	183	71.6	27	4.77	16	12	143	277	1.259	3.7	139	5.13	2.375	4.888	70	1.987	5.1	1.025	2	2	20	183	143	3.7
120825	2	56	2	2	10367.18532	11192.46636	26	41	81	25	28	5.36	101	274	93.7	34	4.83	42	10.4	173	285	0.743	3.8	143	5.13	2.4	5.819	75	1.423	6.3	1.157	2	2	25	274	173	3.8
110129	1	52	2	2	8313.818675	8782.95256	26	34	57	21	23	4.28	104	101	105.2	31	8.94	19	17.7	110	286	1.098	3.7	142	5.13	2.225	4.526	65	2.823	6	1.06	0	0	21	101	110	3.7
117826	2	61	2	2	13825.36172	14554.61868	26	40	67	32	22	5	104	615	95.47	33	5.88	54	12.7	266	282	0.936	3.5	141	10.26	2.4	5.094	73	0.994	7.1	1.038	2	2	32	615	266	3.5
112583	2	60	2	2	3906.368863	3895.53135	26	46	91	21	29	6.78	100	97	86.63	25	5.16	99	12.4	162	279	1.292	3.7	139	5.13	2.475	5.896	71	2.089	6.3	0.851	2	2	21	97	162	3.7
119407	1	57	2	2	7803.040514	8076.061526	26	44	69	21	25	5	99	341	109.62	27	5.22	47	10.4	145	276	1.195	3.8	138	3.42	2.375	4.06	71	2.845	7	1.126	2	2	21	341	145	3.8
117266	2	79	1	2	34420.11422	38726.03671	26	44	51	23	28	3.57	101	74	49.5	25	5.5	20	20.8	153	286	1.292	4.7	144	11.97	2.45	4.344	69	0.734	5.3	0.766	1	1	23	74	153	4.7
114444	1	68	1	2	38148.27212	40924.75435	26	36	69	34	26	5	103	63	83.98	41	4.72	18	10	200	277	1.227	4.3	139	5.13	2.225	3.388	77	1.287	5.8	1.273	0	0	34	63	200	4.3
120214	2	67	1	2	114865.5432	126290.0622	26	39	80	24	26	5.36	100	80	84.86	25	4.55	9	16.3	176	276	1.13	4.3	138	8.55	2.25	6.724	64	1.75	5.4	0.816	2	2	24	80	176	4.3
119934	1	79	4	1	12532.74857	12536.16234	26	41	59	23	26	9.64	106	108	95.47	29	5.44	28	12.9	179	290	1.453	4.2	143	6.84	2.275	4.163	70	3.172	4.6	1.149	2	2	23	108	179	4.2
109330	1	76	4	1	19197.13663	20618.19805	26	41	68	31	24	5.36	105	69	63.65	33	5.55	37	18.3	127	288	0.872	4	144	6.84	2.25	4.319	74	0.869	5.6	0.912	1	1	31	69	127	4
110390	1	61	4	1	10859.3071	11215.84263	26	43	63	23	25	6.43	99	294	79.56	30	6.61	52	21.7	175	275	0.904	3.8	136	8.55	2.3	8.042	73	0.948	4.1	1.172	2	2	23	294	175	3.8
119876	1	60	4	1	8302.191946	8915.634674	26	42	56	20	25	6.78	106	115	74.26	28	6.38	11	7.3	132	294	1.001	4.3	146	6.84	2.275	2.689	70	1.095	6.3	1.181	0	0	20	115	132	4.3
119016	1	56	4	1	6624.863742	6744.311917	26	34	59	16	26	6.78	98	125	83.98	39	4.39	39	5.6	141	275	1.324	3.8	137	8.55	2.225	4.319	73	1.242	4.2	1.054	2	2	16	125	141	3.8
113122	2	54	4	1	19262.76865	19215.51234	26	44	87	17	24	3.57	102	96	53.04	25	6.27	29	12.7	135	281	1.292	4.4	141	6.84	2.425	3.155	69	1.581	3.5	1.019	2	2	17	96	135	4.4
123918	2	54	4	1	12135.77169	11713.7948	26	38	77	18	26	5	98	62	76.91	30	4.55	27	24	144	277	0.936	4.2	139	5.13	2.25	5.948	68	2.935	4	1.001	2	2	18	62	144	4.2
120704	1	53	4	1	11951.00967	12430.0704	26	39	49	18	30	6.07	101	168	81.33	35	5.66	22	11.3	150	285	1.195	4	142	5.13	2.25	5.767	74	5.081	6.6	1.044	0	0	18	168	150	4
119142	1	69	3	1	3553.739353	3825.50643	26	38	61	16	26	9.28	103	234	104.31	27	5.77	14	9.3	182	292	1.195	3.5	144	5.13	2.275	3.724	65	2.608	6.3	0.918	NA	3	16	234	182	3.5
118890	1	67	3	1	13062.18242	14459.535	26	46	72	23	22	7.14	98	86	118.46	35	6.61	49	12	151	283	1.033	4.2	140	18.81	2.275	3.879	81	1.727	4.7	0.898	2	2	23	86	151	4.2
112238	2	66	3	1	4986.365011	5300.672285	26	41	59	22	23	5.71	99	185	76.91	33	6.55	20	12.7	141	276	1.227	4	137	5.13	2.475	5.508	74	2.179	7.5	1.012	0	0	22	185	141	4
117665	2	66	3	1	11342.48721	11775.72736	26	41	86	27	26	7.85	105	77	80.44	27	5.16	15	11.1	192	290	1.195	3.8	144	3.42	2.275	6.232	68	1.31	6	0.746	2	2	27	77	192	3.8
112047	1	63	3	1	12026.05815	13312.56931	26	37	64	18	22	6.43	106	219	90.17	36	5.88	33	14.5	145	284	1.227	4.3	141	5.13	2.25	4.939	73	0.994	7.9	1.155	2	2	18	219	145	4.3
113668	1	75	2	1	4947.529813	5006.485862	26	41	75	27	26	10	104	486	123.76	32	15.82	15	9.1	220	299	1.13	3.7	142	6.84	2.3	3.336	73	1.31	5	1.552	NA	3	27	486	220	3.7
113777	1	69	2	1	3700.366268	3900.280871	26	45	99	27	25	5.71	101	469	122.88	33	5.33	40	22.4	187	284	0.969	4.3	142	10.26	2.375	3.646	78	1.298	4.2	0.986	0	0	27	469	187	4.3
121867	1	65	2	1	3853.79721	4042.649454	26	42	104	22	23	4.28	98	231	101.66	31	9.83	44	9.5	189	289	1.162	4.7	143	10.26	2.475	4.526	73	1.614	3.9	1.268	0	0	22	231	189	4.7
123104	1	62	2	1	9276.986797	9827.803033	26	43	86	20	30	6.07	99	539	94.59	32	5.55	51	19	152	283	1.324	4.2	141	6.84	2.475	4.603	75	1.05	7.3	1.409	2	2	20	539	152	4.2
110629	2	80	1	1	10247.73533	12680.74746	26	41	75	41	24	7.5	96	195	68.07	24	4.88	27	9.1	243	271	1.162	4.2	134	5.13	2.35	5.353	65	0.779	6.1	0.616	0	0	41	195	243	4.2
120611	1	76	1	1	40005.53824	43585.43131	26	44	57	49	29	5	96	2531	76.91	25	5.33	19	9	185	274	1.098	3.3	137	11.97	2.4	4.758	69	2.19	8.4	1.219	0	0	49	2531	185	3.3
119369	1	73	1	1	57197.64165	60941.3864	26	38	132	18	24	5.36	97	59	73.37	28	5.66	96	13.4	106	267	1.162	4.3	133	5.13	2.225	3.827	66	1.479	5.3	1.068	0	0	18	59	106	4.3
110762	1	66	1	1	26776.52738	28051.84105	26	39	71	19	23	5.71	104	91	93.7	26	9.27	21	14	147	290	1.195	3.9	143	8.55	2.175	2.974	65	1.389	5	1.283	2	2	19	91	147	3.9
120483	2	64	1	1	67199.58577	69674.06831	26	40	60	29	26	4.28	97	221	48.62	29	4.94	12	11.3	233	266	1.292	4.5	133	5.13	2.325	5.793	69	0.418	3.3	0.974	2	2	29	221	233	4.5
115292	1	62	1	1	45628.41237	49554.29954	26	48	54	21	25	5.36	102	188	80.44	23	5.72	29	19.3	162	284	1.001	4.2	142	10.26	2.35	6.051	71	1.569	6.4	1.162	2	2	21	188	162	4.2
118611	2	59	1	1	78739.51443	78532.63947	26	42	66	22	29	6.78	104	69	68.95	32	5.22	24	17.6	128	287	1.259	4.4	143	10.26	2.325	4.913	74	1.129	4.7	1.167	2	2	22	69	128	4.4
121917	2	56	1	1	38504.0073	43771.99517	26	38	80	22	28	1.79	104	63	64.53	29	5.22	15	14.9	189	282	1.259	4.6	143	5.13	2.3	5.275	67	1.152	4.5	0.861	NA	3	22	63	189	4.6
121597	1	55	1	1	23301.91347	23955.8437	26	42	64	18	27	2.86	98	60	75.14	33	6.16	14	15.8	121	277	1.13	4.1	139	10.26	2.25	5.224	75	1.897	4.1	1.032	0	0	18	60	121	4.1
116855	2	67	4	2	19835.62405	20915.90419	25	39	101	33	26	6.07	100	108	76.91	37	5.55	42	8.8	182	287	1.066	4.5	143	5.13	2.4	4.939	76	1.377	5.7	0.824	2	2	33	108	182	4.5
113109	2	57	4	2	8387.078608	8969.111404	25	44	47	18	25	6.78	104	87	61	32	6.33	48	16.5	184	288	1.13	4.2	143	11.97	2.325	5.069	76	1.366	4.6	1.021	0	0	18	87	184	4.2
112565	2	50	4	2	28205.63616	27390.51121	25	39	102	25	26	6.78	103	164	79.56	28	5.33	16	14.3	219	283	1.162	3.6	141	3.42	2.375	4.784	67	1.264	4.8	0.822	2	2	25	164	219	3.6
118050	1	69	3	2	8134.218812	8748.419623	25	43	56	26	24	5	97	412	83.1	26	7.38	21	20.4	148	280	1.292	4.6	139	15.39	2.375	2.896	69	0.892	6.8	0.984	0	0	26	412	148	4.6
120218	1	65	2	2	3909.826437	4125.940198	25	43	51	29	25	5	101	733	71.6	39	7.22	50	22.9	187	278	1.227	3.7	138	6.84	2.475	4.836	82	0.96	7.9	1.058	0	0	29	733	187	3.7
124257	2	59	2	2	12072.54776	13033.5844	25	41	68	24	26	2.86	101	193	84.86	28	6	44	15.9	198	276	1.001	4.3	139	10.26	2.25	3.569	69	1.05	7.2	1.147	0	0	24	193	198	4.3
117402	2	58	2	2	15479.00624	16077.53053	25	44	70	22	28	3.21	102	542	85.75	29	5.61	17	11.6	236	280	1.356	4.5	141	3.42	2.45	4.577	73	1.434	4.5	1.039	2	2	22	542	236	4.5
112874	1	57	2	2	17006.41284	17476.49476	25	38	74	15	22	4.64	104	177	84.86	27	6.72	23	16.1	205	284	0.775	3.8	142	6.84	2.275	5.741	65	0.587	5.1	0.755	2	2	15	177	205	3.8
118399	1	66	2	2	10650.88213	11334.36422	25	37	42	26	22	12.5	92	396	952.95	38	4	96	26.1	191	275	2.615	7.1	134	6.84	2.225	3.957	75	0.689	6.2	1.096	2	2	26	396	191	7.1
113240	2	60	2	2	6867.558686	7114.725131	25	42	97	28	24	3.93	101	148	76.91	31	5	47	12.4	223	280	1.066	3.9	141	6.84	2.35	5.508	73	1.219	5.4	0.898	2	2	28	148	223	3.9
109351	1	58	2	2	12686.95692	13295.17285	25	43	59	24	21	3.93	98	159	106.96	27	4.77	37	16.3	150	274	1.13	4.5	138	6.84	2.45	3.776	70	0.621	5.3	0.962	0	0	24	159	150	4.5
123284	2	58	1	2	22807.29634	24192.20948	25	38	130	25	23	4.28	100	149	68.95	30	5	30	17.2	248	279	1.227	4.1	140	5.13	2.25	7.008	68	1.919	6.8	0.889	2	2	25	149	248	4.1
121068	2	54	1	2	24206.74477	24644.08285	25	45	134	24	27	5	100	84	62.76	25	5.22	18	14.9	187	281	1.033	4.4	141	1.71	2.45	4.37	70	1.208	2.5	0.95	0	0	24	84	187	4.4
124287	1	56	1	2	248091.4959	258159.0762	25	43	67	35	28	7.14	100	486	111.38	25	5.55	27	21.7	155	278	1.001	4.4	138	8.55	2.3	4.344	68	0.869	5.9	1.025	2	2	35	486	155	4.4
121549	2	72	4	1	11747.28615	12867.48459	25	43	52	31	26	4.64	103	377	84.86	30	5.72	16	11.1	251	285	1.421	3.8	143	6.84	2.3	3.801	73	2.879	4.4	0.763	0	0	31	377	251	3.8
112117	1	72	4	1	22045.72733	23449.29621	25	39	59	25	27	5.71	101	145	91.05	33	5.05	35	13.8	193	286	0.936	4.3	143	5.13	2.425	3.569	72	2.202	6.5	0.835	0	0	25	145	193	4.3
120097	2	70	4	1	8872.543891	9976.793761	25	45	47	27	28	4.28	102	269	56.58	27	5.27	31	19	205	285	1.162	3.9	143	8.55	2.25	4.267	72	1.682	2.8	1.055	1	1	27	269	205	3.9
115039	1	69	4	1	8200.177298	8906.378329	25	43	70	31	16	10	100	418	116.69	31	3.55	15	14.7	166	279	1.388	3.9	138	8.55	2.4	4.344	74	2.518	6.6	1.195	0	0	31	418	166	3.9
109371	1	62	4	1	5337.058368	5571.469217	25	38	80	24	29	3.57	100	232	92.82	33	5.27	41	23.3	165	278	1.098	4.4	140	6.84	2.275	5.663	71	2.021	5.9	1.148	2	2	24	232	165	4.4
111839	2	61	4	1	7554.676455	8112.520951	25	39	87	31	26	6.07	103	118	89.28	35	5.55	22	21.1	229	285	1.421	4.4	142	8.55	2.25	5.043	74	2.653	6.7	0.896	NA	3	31	118	229	4.4
123138	2	61	4	1	10816.98327	12095.8021	25	39	86	29	29	2.86	102	74	43.32	29	5.38	29	22.4	203	281	1.292	4.1	142	8.55	2.25	4.965	68	1.14	4.2	0.808	2	2	29	74	203	4.1
120315	1	61	4	1	4966.882551	5485.41178	25	40	110	20	23	7.14	102	164	79.56	31	7.05	44	17.4	139	280	0.775	4.1	138	5.13	2.325	5.172	71	3.522	5.7	1.124	2	2	20	164	139	4.1
113982	1	57	4	1	15342.81917	17024.93674	25	46	82	21	23	7.85	100	164	102.54	28	5.22	48	19.3	163	288	1.066	3.2	143	6.84	2.375	5.094	74	2.337	8.6	1.06	NA	3	21	164	163	3.2
109389	1	56	4	1	11139.26233	12933.27083	25	43	48	30	26	7.5	98	429	90.17	32	6.05	54	21.1	201	281	1.098	4.1	139	6.84	2.275	5.25	75	1.705	7.5	1.106	2	2	30	429	201	4.1
114145	1	54	4	1	9985.429166	10514.11327	25	39	69	24	27	7.14	102	252	68.95	32	5.11	11	22	181	282	1.195	4.7	140	6.84	2.3	5.87	71	0.723	4.8	0.658	2	2	24	252	181	4.7
124423	1	52	4	1	11307.74209	12610.26073	25	44	66	19	27	5.71	100	174	76.91	32	5.66	89	18.3	205	283	1.259	4.4	141	6.84	2.35	4.732	76	1.434	8.8	1.059	2	2	19	174	205	4.4
110897	1	50	4	1	11307.74209	12610.26073	25	39	66	26	27	1.79	98	107	81.33	33	5.55	45	14.5	130	269	1.195	4.3	136	5.13	2.175	5.094	72	4.516	6.9	1.072	2	2	26	107	130	4.3
113852	2	78	3	1	13152.15705	14461.09771	25	40	105	42	18	4.28	100	26	68.95	35	5.38	127	16.3	121	277	1.292	3.5	139	10.26	2.525	4.81	75	1.942	7.7	1.095	0	0	42	26	121	3.5
119360	2	60	3	1	3193.341948	3375.704645	25	43	69	25	26	4.28	99	88	56.58	29	5.55	28	26.5	154	277	1.098	4.3	139	17.1	2.3	6.181	72	1.795	4.8	0.907	0	0	25	88	154	4.3
113922	1	58	3	1	8484.627375	9212.273923	25	41	91	23	28	6.07	104	214	76.91	27	5.05	31	11.5	191	288	1.227	4.1	144	5.13	2.25	4.603	68	1.694	4.9	1.26	0	0	23	214	191	4.1
117695	2	66	2	1	4920.70864	5067.899611	25	39	68	32	27	4.28	92	114	74.26	35	6.33	29	10.9	167	271	1.098	3.7	135	3.42	2.375	6.232	74	4.753	6.8	1.357	NA	3	32	114	167	3.7
115751	2	61	2	1	6359.472883	6630.294742	25	44	51	22	29	3.93	102	99	53.04	25	4.83	20	20.2	190	287	1.324	4.1	145	5.13	2.35	7.474	69	3.918	3.5	1.006	2	2	22	99	190	4.1
122647	2	60	2	1	4974.504731	5241.356716	25	36	116	27	20	12.14	106	69	105.2	29	4.72	25	11.3	137	296	1.647	3.2	145	3.42	2.3	5.87	65	0.982	5.7	1.061	0	0	27	69	137	3.2
120001	2	57	2	1	19798.58239	22534.72928	25	38	100	28	26	5.36	98	428	93.7	41	4.55	20	10.2	145	274	1.195	4.4	137	6.84	2.6	4.655	79	1.163	5.6	0.809	0	0	28	428	145	4.4
112535	1	53	2	1	10727.82851	11438.61742	25	38	77	22	28	4.64	100	320	106.08	40	6.27	38	22	190	282	0.872	5	141	8.55	2.325	5.12	78	0.971	7.9	1.325	0	0	22	320	190	5
115428	1	52	2	1	7315.351018	7914.70691	25	40	78	29	25	3.93	103	590	91.05	34	6.11	37	11.5	200	279	0.936	4.1	140	5.13	2.325	5.508	74	1.253	6	1.029	2	2	29	590	200	4.1
115676	2	75	1	1	20109.79536	21173.55467	25	40	144	22	27	5.71	105	63	78.68	30	5.66	69	20.2	172	288	1.098	4.5	144	5.13	2.375	5.275	70	2.145	4.6	0.753	NA	3	22	63	172	4.5
112019	2	74	1	1	21135.57591	22839.10311	25	43	66	27	25	6.07	104	77	80.44	28	5.5	17	12.4	135	288	1.292	4.9	144	5.13	2.625	5.431	71	1.264	5.3	1.081	2	2	27	77	135	4.9
109588	1	71	1	1	10169.79152	10349.8719	25	42	82	37	25	5.71	103	546	83.98	30	5	17	19	242	284	1.13	4.8	142	22.23	2.35	3.853	72	0.621	5.2	1.186	2	2	37	546	242	4.8
117734	1	67	1	1	107126.5969	116622.9218	25	40	76	21	21	6.43	102	219	100.78	26	6.38	27	17	131	286	1.066	5	142	5.13	2.375	4.939	66	1.005	7.4	1.148	NA	3	21	219	131	5
114049	2	66	1	1	117826.5396	121297.1586	25	43	80	17	25	6.07	96	150	53.92	27	5.61	20	17.6	188	283	1.324	4.1	141	6.84	2.35	5.12	70	2.213	5.4	1.177	2	2	17	150	188	4.1
123539	1	60	1	1	40376.34743	41651.20969	25	39	92	20	24	5.36	99	215	77.79	28	7.72	63	16.7	146	277	1.13	4.4	137	13.68	2.225	4.112	67	2.134	5.4	1.132	2	2	20	215	146	4.4
117657	2	55	1	1	55982.70424	59920.9368	25	41	99	22	28	4.64	100	79	61.88	30	5.11	19	8.6	168	281	1.518	4.2	141	3.42	2.4	5.353	71	1.208	3.3	0.854	2	2	22	79	168	4.2
116109	2	54	1	1	102245.2116	108518.3047	25	32	48	27	25	4.64	100	115	58.34	36	6.27	37	19.2	168	280	0.904	3.8	140	5.13	2.225	4.37	68	2.721	4.9	1.307	2	2	27	115	168	3.8
124609	2	73	4	2	21880.95826	24141.04559	24	37	122	34	27	8.57	102	82	51.27	35	5.38	28	17	192	289	1.098	4	143	5.13	2.275	6.051	72	0.971	4.6	1.107	NA	3	34	82	192	4
114159	1	73	4	2	3689.563713	4060.484539	24	44	112	23	29	5.36	97	222	84.86	33	5.94	37	12.9	179	281	1.098	4.4	140	8.55	2.4	7.525	77	2.495	8.2	1.057	1	1	23	222	179	4.4
119839	2	68	4	2	27413.3045	28733.07052	24	47	151	22	24	6.78	99	93	66.3	31	4.66	18	23.3	160	283	1.227	4.2	141	11.97	2.375	5.819	78	1.919	5.5	0.929	0	0	22	93	160	4.2
121907	1	64	4	2	7024.60711	7155.343549	24	41	67	20	25	6.43	101	107	68.07	31	5.16	16	14.1	129	277	1.13	3.9	138	6.84	2.25	3.62	72	0.847	6.3	1.139	0	0	20	107	129	3.9
115736	2	62	4	2	9373.475534	9899.882866	24	41	103	30	27	7.5	105	64	46.85	26	6	75	9.9	193	294	1.033	4.2	146	3.42	2.25	4.991	67	1.66	5.8	1.08	0	0	30	64	193	4.2
110975	2	58	4	2	8905.027856	9169.904802	24	38	106	15	22	7.14	98	109	73.37	36	11.88	29	17.2	139	285	1.195	4.5	138	5.13	2.325	5.534	74	3.658	6.9	1.374	2	2	15	109	139	4.5
111354	1	58	4	2	11676.28905	12779.52426	24	37	65	18	23	5	106	150	85.75	32	5.55	32	20.1	134	282	0.969	3.9	141	8.55	2.25	4.836	69	1.264	4.8	1.176	2	2	18	150	134	3.9
113501	1	56	4	2	20422.28406	22749.34972	24	31	117	29	23	3.57	109	217	62.76	39	5.72	37	43.5	185	282	0.936	3.8	142	11.97	2.1	3.491	70	0.655	3.2	0.92	0	0	29	217	185	3.8
121253	2	55	4	2	37254.42413	39289.62592	24	40	84	20	27	3.57	102	131	55.69	35	4.88	22	12.4	185	282	1.227	4.1	142	5.13	2.4	6.827	75	1.953	5.4	0.872	0	0	20	131	185	4.1
113945	1	55	4	2	7606.991646	7622.529048	24	44	48	32	28	7.85	100	178	98.12	32	4.88	45	23.6	197	290	1.324	4	144	6.84	2.425	6.362	76	3.048	8.5	0.917	2	2	32	178	197	4
111443	1	60	3	2	14869.39794	15749.92746	24	46	68	23	25	3.21	95	102	81.33	27	5.05	41	11.3	108	278	1.324	4	140	6.84	2.425	3.595	73	1.931	5.1	1.092	2	2	23	102	108	4
111523	2	59	3	2	5787.383349	5780.839659	24	40	83	29	29	8.21	98	58	84.86	35	8.55	19	27.6	153	286	1.13	4.1	140	8.55	2.225	3.905	75	1.626	6.1	0.855	0	0	29	58	153	4.1
116467	1	55	3	2	20530.52181	21872.22714	24	42	83	22	25	5	103	193	69.84	32	4.77	16	13.3	187	281	1.066	3.6	141	6.84	2.225	4.293	74	1.14	4.5	0.996	NA	3	22	193	187	3.6
118412	2	68	2	2	12856.14723	13020.46304	24	43	93	26	28	4.64	100	150	79.56	33	4.83	11	16.8	185	277	1.227	3.3	139	8.55	2.375	4.577	76	0.576	4.7	1.044	2	2	26	150	185	3.3
112542	2	65	2	2	6361.888319	6644.908873	24	38	228	34	26	17.49	102	73	186.52	32	8.22	337	13.8	252	304	1.421	4.3	145	3.42	2.325	5.974	70	4.9	4.9	0.963	0	0	34	73	252	4.3
114894	1	62	2	2	10909.08048	11443.67123	24	41	97	22	28	4.28	101	266	99.01	28	5.44	25	13.6	152	275	0.936	4.1	138	8.55	2.45	4.758	69	0.768	4.5	1.066	0	0	22	266	152	4.1
113222	2	60	2	2	11749.98257	12503.61216	24	43	68	26	24	3.57	92	199	77.79	26	5.27	20	11.1	180	256	1.098	4.2	128	5.13	2.3	6.051	69	1.174	3.5	0.929	2	2	26	199	180	4.2
123689	2	58	2	2	16442.48936	17863.68348	24	41	97	20	28	4.64	100	184	68.95	34	5	26	7.5	178	281	1.227	3.8	141	5.13	2.325	4.344	75	0.79	4.2	1.014	2	2	20	184	178	3.8
123310	2	52	2	2	16621.76574	18133.70065	24	38	92	25	27	4.64	105	98	66.3	35	5.44	21	16.8	225	287	1.421	4.3	144	6.84	2.275	5.379	73	2.258	8.4	1.18	0	0	25	98	225	4.3
123084	1	50	2	2	6085.804703	6584.422323	24	32	148	30	27	2.5	99	53	72.49	35	5.11	355	5	168	277	1.227	4.4	140	49.59	2.1	2.922	67	0.903	5.3	1.236	0	0	30	53	168	4.4
124566	1	80	1	2	31091.28589	34815.8288	24	41	83	25	22	5	98	38	71.6	40	5.27	49	31	130	272	0.84	4.5	136	15.39	2.4	5.508	81	2.269	6.3	1.005	NA	3	25	38	130	4.5
121251	1	80	1	2	10189.39919	11268.55297	24	37	72	22	24	5.71	102	205	94.59	29	4.88	24	15.6	193	278	1.259	4.8	139	8.55	2.375	3.957	66	1.592	6.3	0.947	0	0	22	205	193	4.8
113978	2	77	1	2	28204.47511	37716.58308	24	40	83	25	28	7.5	104	41	54.81	31	4.5	26	10.2	152	289	1.324	4.2	144	5.13	2.275	3.724	71	1.197	5.3	0.774	0	0	25	41	152	4.2
117678	1	76	1	2	11688.89707	11926.21242	24	43	71	26	27	4.28	99	81	57.46	30	10.66	82	23.3	170	286	1.227	4.4	141	29.07	2.4	4.422	73	1.784	5.5	1.081	0	0	26	81	170	4.4
123570	2	74	1	2	68456.71626	72892.09132	24	39	81	22	28	7.5	102	159	79.56	28	5.16	15	16.1	209	282	1.13	4	140	10.26	2.3	5.482	67	1.016	2.4	0.801	2	2	22	159	209	4
116339	1	69	1	2	14119.42551	14886.20848	24	41	89	17	26	6.43	102	66	82.21	29	6.22	25	6.3	139	286	1.356	4.3	142	6.84	2.2	2.741	70	0.824	3.4	1.16	0	0	17	66	139	4.3
124175	1	66	1	2	45518.04334	51894.61672	24	38	69	18	28	3.21	100	75	72.49	29	4.88	25	19.9	105	279	1.033	4.4	141	6.84	2.25	5.974	67	0.982	3.7	1.141	2	2	18	75	105	4.4
120509	2	64	1	2	40127.25293	39238.8832	24	41	65	21	28	7.5	98	230	79.56	35	5.5	13	10.7	247	282	1.356	4	140	5.13	2.4	5.069	76	1.637	6.1	1.063	2	2	21	230	247	4
109630	2	56	1	2	241097.4947	243396.7631	24	43	64	20	27	3.93	101	129	53.92	32	6.05	14	17.4	134	283	1.162	4	142	6.84	2.4	5.508	75	1.671	5.2	0.992	1	1	20	129	134	4
119799	2	70	4	1	13689.9976	14703.79445	24	39	81	28	28	5.36	103	136	61.88	28	4.94	18	31.9	191	283	1.033	3.6	142	8.55	2.225	5.534	67	1.502	3.2	0.863	0	0	28	136	191	3.6
119363	1	70	4	1	14768.87562	14866.94318	24	43	89	28	21	7.14	98	413	150.28	33	8.44	34	16.5	162	281	1.033	4.1	138	20.52	2.35	3.62	76	0.881	7.4	1.015	NA	3	28	413	162	4.1
123302	1	69	4	1	5782.97706	6013.605281	24	43	59	22	27	3.93	94	173	57.46	28	6.27	20	11.6	148	270	1.195	3.3	135	8.55	2.225	2.56	71	0.937	4.4	1.008	0	0	22	173	148	3.3
117108	1	69	4	1	10940.89646	11849.22868	24	47	52	21	26	3.93	99	98	76.02	26	5.94	15	28.5	132	279	1.066	4.2	140	13.68	2.375	6.646	73	1.874	5.4	0.782	0	0	21	98	132	4.2
121243	2	62	4	1	3182.581244	3216.684933	24	46	82	24	26	6.07	102	138	66.3	29	5.66	26	12.2	181	289	1.324	3.9	144	3.42	2.225	6.905	75	3.24	8	0.804	2	2	24	138	181	3.9
124221	1	62	4	1	11003.66822	11768.88381	24	41	101	20	29	5.36	103	106	82.21	29	5.27	47	20.6	154	284	1.033	4.1	142	13.68	2.325	5.275	70	4.053	6.2	1.125	1	1	20	106	154	4.1
112446	1	55	4	1	8444.714445	8592.649986	24	40	91	24	24	6.07	102	140	85.75	26	5.05	16	22.2	156	275	1.162	4.3	137	22.23	2.3	2.845	66	0.677	5.4	1.353	2	2	24	140	156	4.3
118333	1	55	4	1	6718.8357	6998.241208	24	45	68	22	27	3.93	100	181	72.49	29	5.11	19	29.7	183	278	1.162	3.9	140	10.26	2.3	3.724	74	1.084	7.1	0.971	2	2	22	181	183	3.9
116786	1	55	4	1	13221.74825	14403.61971	24	42	71	18	25	5.71	101	138	108.73	29	8.33	25	11.8	110	280	1.001	3.8	138	10.26	2.3	3.879	71	0.994	6.5	0.896	NA	3	18	138	110	3.8
117235	2	53	4	1	16278.43836	16677.12854	24	37	65	17	23	5	103	52	56.58	34	5.44	84	17.6	115	278	0.775	3.6	139	6.84	2.15	5.172	71	1.152	4.5	0.939	2	2	17	52	115	3.6
119478	1	51	4	1	16247.70154	17622.32349	24	44	67	16	26	6.78	100	55	113.15	28	5.66	16	19.7	122	280	1.098	4.3	139	8.55	2.4	4.707	72	0.677	7.4	1.023	0	0	16	55	122	4.3
112071	2	57	3	1	13259.3254	14135.63955	24	39	103	18	23	5	100	61	54.81	35	9.27	30	4.7	154	282	1.066	4	139	25.65	2.3	5.534	74	0.937	4.3	0.629	NA	3	18	61	154	4
111411	2	50	3	1	12220.08318	13242.11107	24	37	189	15	27	6.43	98	60	38.9	35	15.88	58	17.6	175	288	1.098	4.4	138	6.84	2.325	7.163	72	2.111	2.2	0.923	0	0	15	60	175	4.4
121775	1	59	2	1	14226.70787	14964.43757	24	41	53	22	25	7.85	103	88	111.38	35	4.72	28	14.7	163	284	1.227	4.5	141	11.97	2.35	6.543	76	0.621	6.6	1.017	2	2	22	88	163	4.5
121484	2	56	2	1	9191.413524	10032.86966	24	41	71	70	26	2.14	100	7655	76.02	27	4.44	23	15.6	369	270	1.001	3.9	137	8.55	2.25	5.25	68	0.632	2.6	1.046	2	2	70	7655	369	3.9
114996	2	55	2	1	11521.44263	11856.71446	24	39	68	23	27	3.57	102	150	57.46	35	4.88	40	15	176	282	1.066	4	142	3.42	2.425	5.741	74	3.184	4.2	0.898	2	2	23	150	176	4
110168	2	54	2	1	25582.03138	26548.7456	24	40	82	20	25	6.43	101	427	76.02	39	5.77	43	16.7	183	282	1.227	4	140	3.42	2.35	6.775	79	1.671	6.6	1.107	2	2	20	427	183	4
122463	1	53	2	1	8139.960153	8556.771721	24	41	61	22	23	5.71	105	838	81.33	36	4.88	25	13.6	175	280	1.033	4.3	140	6.84	2.35	5.25	77	1.931	7	1.408	2	2	22	838	175	4.3
109504	1	53	2	1	8537.324722	9683.204165	24	44	80	26	26	6.43	96	629	113.15	33	15.76	67	14	194	288	1.227	4.3	138	10.26	2.5	5.379	77	2.145	6.2	1.056	2	2	26	629	194	4.3
123496	2	73	1	1	8049.504157	8801.656444	24	41	95	30	17	7.14	117	43	111.38	26	6.22	66	13.8	138	298	0.969	5.4	148	8.55	2.2	3.181	67	1.964	6	0.871	2	2	30	43	138	5.4
111449	1	59	1	1	20894.97208	23187.7345	24	42	97	31	38	5	100	96	56.58	28	5.88	26	17.9	152	293	0.936	4	147	5.13	2.525	6.982	70	2.687	4	0.79	0	0	31	96	152	4
118573	2	57	1	1	26426.49583	27929.47149	24	44	98	28	25	5.36	98	76	68.95	23	4.83	38	12.2	NA	272	1.195	4.1	136	5.13	2.4	6.051	67	1.919	5.7	1.221	2	2	28	76	164	4.1
113998	2	53	1	1	83823.06924	91448.79459	24	41	68	20	25	6.07	104	40	60.11	23	5.11	26	14.9	127	286	1.259	4.8	143	5.13	2.35	5.534	64	1.75	5.8	0.91	2	2	20	40	127	4.8
116210	2	52	1	1	93728.06739	104527.0438	24	38	70	19	22	3.93	105	86	50.39	29	5.27	14	8.1	176	284	1.098	4.1	143	5.13	2.3	4.5	67	1.727	4.6	1.133	2	2	19	86	176	4.1
115961	1	52	1	1	47815.24551	51019.94207	24	43	79	20	25	5.36	101	165	82.21	30	5.27	21	7.7	133	276	1.13	4.6	138	6.84	2.3	4.913	73	1.773	6.2	1.055	2	2	20	165	133	4.6
111350	1	62	4	2	2696.140786	2823.786337	23	34	113	31	22	3.21	101	404	46.85	33	7.88	34	14.9	152	275	0.807	3.7	137	10.26	2.15	4.241	67	1.434	6	1.127	0	0	31	404	152	3.7
113733	1	68	4	2	6931.364387	7661.518225	23	39	66	18	27	6.78	103	84	76.02	30	6.05	34	12.2	142	286	0.872	3.7	142	13.68	2.325	5.069	69	1.174	4.8	0.726	0	0	18	84	142	3.7
122056	2	61	4	2	11083.68768	11751.62757	23	40	65	20	26	5.71	98	99	70.72	30	6.94	30	15.8	128	278	1.388	3.6	138	5.13	2.375	4.396	70	1.264	7.2	0.874	2	2	20	99	128	3.6
116734	2	56	4	2	17116.41848	18138.48109	23	41	106	18	25	5.36	103	117	64.53	31	5.72	13	15.8	151	280	0.969	5.1	140	6.84	2.3	5.017	72	0.677	4	0.956	0	0	18	117	151	5.1
118058	1	50	4	2	42450.36818	45188.16407	23	41	69	23	25	3.93	102	152	77.79	31	4.66	35	17.4	143	278	1.001	3.8	140	11.97	2.15	6.543	72	1.231	5.6	0.973	2	2	23	152	143	3.8
120054	2	80	3	2	8795.242543	10082.73315	23	40	56	19	25	7.85	104	65	71.6	29	5.61	32	27.6	177	288	1.033	4.2	143	8.55	2.225	4.681	69	3.218	7.3	0.745	0	0	19	65	177	4.2
115187	1	63	3	2	20522.94716	22193.04203	23	39	304	25	24	13.92	100	337	772.62	33	4.27	51	17.9	156	291	1.227	4.6	142	8.55	2.275	4.681	72	1.705	4.7	0.951	NA	3	25	337	156	4.6
112270	1	58	3	2	16072.92349	16505.26546	23	42	87	21	28	7.14	100	79	80.44	31	7.11	55	23.1	122	286	1.098	4.7	141	15.39	2.475	3.801	73	0.869	6	0.767	0	0	21	79	122	4.7
110704	1	63	2	2	7279.566287	7733.656223	23	39	65	24	23	2.86	97	235	93.7	32	4.88	23	10.4	159	264	1.227	4.4	133	5.13	2.3	3.233	71	0.926	4.3	1.246	1	1	24	235	159	4.4
112488	1	61	2	2	3252.815245	3305.37314	23	39	74	23	23	6.07	102	254	76.91	32	5.83	25	14.3	158	281	0.84	4.1	140	5.13	2.275	6.284	71	1.795	5.9	1.118	2	2	23	254	158	4.1
118500	1	57	2	2	3859.05183	3925.66193	23	43	75	28	27	5.36	102	366	88.4	34	5.22	24	15	198	284	1.066	4.5	142	20.52	2.35	2.87	77	0.768	7.7	0.994	NA	3	28	366	198	4.5
109902	2	75	2	2	7665.329124	8400.22987	23	36	129	31	21	8.57	102	184	103.43	34	6.61	71	12.2	252	288	1.13	4.3	142	3.42	2.3	3.905	70	1.276	7.6	1.13	0	0	31	184	252	4.3
118957	2	64	2	2	4092.768584	4463.540935	23	41	99	21	22	4.64	104	87	81.33	34	4.55	18	10.9	176	286	1.356	4.1	144	1.71	2.15	5.612	75	1.727	6.9	1.021	0	0	21	87	176	4.1
124593	1	62	2	2	2529.783212	2700.993784	23	41	51	26	26	5	101	178	89.28	29	4.39	30	18.3	193	277	1.292	4	139	13.68	2.3	3.129	70	0.847	4.4	1.125	0	0	26	178	193	4
124215	1	52	2	2	13102.15241	14514.77041	23	42	31	16	24	4.64	101	266	120.22	30	5.5	33	15.2	128	276	1.292	4	138	6.84	2.4	5.224	72	1.569	7.2	1.11	NA	3	16	266	128	4
115524	1	51	2	2	8182.818082	8324.059596	23	41	82	19	29	4.28	101	234	118.46	33	4.44	49	10.6	144	284	1.292	4.6	143	5.13	2.325	6.025	74	3.376	7	1.028	0	0	19	234	144	4.6
122052	2	63	1	2	54065.13806	57201.77121	23	39	78	22	28	7.14	95	253	69.84	33	5.22	14	16.8	225	274	1.259	3	136	6.84	2.25	6.775	72	1.242	7.8	0.902	2	2	22	253	225	3
115560	2	54	1	2	24017.03592	23630.68298	23	44	71	21	21	4.64	102	131	72.49	31	4.66	12	13.8	171	273	1.453	4.4	137	8.55	2.45	6.181	75	1.05	4.8	0.999	0	0	21	131	171	4.4
112005	1	77	1	2	42708.67388	43767.87692	23	43	76	17	29	5.71	98	50	103.43	23	9.99	27	15.8	150	285	1.098	4.5	140	5.13	2.35	4.681	66	3.331	7.1	1.106	0	0	17	50	150	4.5
119959	1	59	1	2	27346.86309	28114.30824	23	40	71	21	26	7.5	99	130	95.47	25	5.72	31	19.2	143	275	1.066	4.5	136	17.1	2.225	4.293	65	2.111	6.1	0.893	0	0	21	130	143	4.5
122314	2	77	4	1	14283.26859	15949.43409	23	35	43	19	27	7.85	98	74	79.56	34	7.77	21	8.1	151	285	0.807	3.7	140	3.42	2.25	4.241	69	2.811	8.4	0.752	NA	3	19	74	151	3.7
112008	1	77	4	1	14323.14122	14327.04268	23	43	72	27	29	6.43	100	277	99.89	37	5.44	93	14.7	184	285	1.195	4.5	142	6.84	2.425	5.327	80	1.185	7	1.042	2	2	27	277	184	4.5
116628	1	74	4	1	7439.215599	8006.504824	23	40	91	19	24	6.43	100	162	91.94	31	5.22	22	16.3	155	275	1.259	4.3	137	13.68	2.25	3.103	71	1.468	7.8	0.906	0	0	19	162	155	4.3
120468	1	69	4	1	8200.177298	8906.378329	23	41	80	20	26	7.14	101	132	90.17	31	5.33	17	19.7	176	282	1.162	4	140	10.26	2.35	7.137	72	2.856	5.9	1.232	1	1	20	132	176	4
118873	1	69	4	1	7021.24146	7431.954323	23	40	74	26	26	5	100	88	75.14	32	5.22	25	17.9	152	276	1.227	4.1	138	6.84	2.275	5.327	72	1.502	5.9	1.117	2	2	26	88	152	4.1
117558	2	63	4	1	9914.325317	10515.74442	23	44	82	21	24	5	102	138	62.76	27	5.38	30	11.5	151	280	1.162	4	140	5.13	2.375	7.112	71	2.01	5.4	1.082	0	0	21	138	151	4
120119	1	62	4	1	7251.794327	7684.304137	23	41	83	27	22	6.07	105	151	84.86	30	5.66	23	17.4	156	283	1.001	4.8	141	10.26	2.5	3.026	71	1.095	7.6	1.175	NA	3	27	151	156	4.8
116012	2	60	4	1	4575.738564	4857.666209	23	38	146	15	24	9.28	96	64	50.39	40	20.59	27	18.6	147	294	1.066	4.2	137	6.84	2.45	7.81	78	3.692	6.3	0.778	NA	3	15	64	147	4.2
123845	1	60	4	1	5309.377697	5615.360031	23	31	172	35	21	2.5	109	191	84.86	32	4.05	101	18.6	273	276	0.84	4.2	140	27.36	2.175	4.448	63	1.502	4.3	0.952	0	0	35	191	273	4.2
120382	2	58	4	1	15469.51588	17188.54843	23	42	94	22	26	6.07	107	105	54.81	26	4.55	134	14.7	132	289	1.162	3.9	145	8.55	2.35	6.543	68	1.264	4.4	0.961	2	2	22	105	132	3.9
115846	2	57	4	1	24891.41937	26582.24628	23	40	71	25	28	4.28	102	278	65.42	37	5.38	12	14.3	167	281	1.13	4.3	141	10.26	2.375	4.913	77	2.439	3.7	0.98	2	2	25	278	167	4.3
123405	1	57	4	1	8312.241822	9490.65323	23	42	65	21	25	7.14	104	147	86.63	32	5.22	19	30.6	168	289	1.227	4.7	144	10.26	2.3	5.327	74	0.982	5.5	1.304	2	2	21	147	168	4.7
122456	2	56	4	1	9303.498845	9735.890541	23	37	107	16	19	6.43	105	150	58.34	36	6.33	20	10.4	174	282	1.098	4.3	140	3.42	2.25	5.508	73	1.998	7.8	1.041	0	0	16	150	174	4.3
112501	2	55	4	1	10162.4056	10003.14874	23	36	96	19	27	3.21	104	78	59.23	32	7.05	18	13.1	170	285	0.872	4	143	3.42	2.2	5.275	68	1.976	5.5	1.079	NA	3	19	78	170	4
122752	1	54	4	1	15446.15875	16521.54226	23	38	49	18	25	7.5	100	69	67.18	31	6.38	52	14.5	123	281	0.969	4.4	139	6.84	2.275	5.922	69	2.427	7.9	1.056	1	1	18	69	123	4.4
116784	1	54	4	1	16794.0914	18455.87306	23	39	94	17	26	4.64	105	110	61	30	7.6	20	17.2	151	289	1.098	4.2	144	10.26	2.3	4.784	69	1.513	6.1	0.954	NA	3	17	110	151	4.2
116691	2	53	4	1	15241.76312	16151.88554	23	37	94	24	23	5	101	165	68.07	35	6.72	54	9.9	194	279	1.098	3.8	139	3.42	2.3	4.603	72	2.123	3.9	0.879	0	0	24	165	194	3.8
109811	1	52	4	1	12061.59157	13450.94477	23	43	87	20	26	3.57	100	156	76.02	29	5.05	24	15.6	122	278	1.195	4.5	140	5.13	2.375	4.707	72	1.682	5.1	0.775	2	2	20	156	122	4.5
116966	1	51	4	1	9858.109007	10713.55756	23	45	96	21	22	6.43	102	228	77.79	36	6.16	37	26.5	115	278	0.936	4.2	138	11.97	2.4	4.396	81	1.784	8.1	0.934	2	2	21	228	115	4.2
112596	2	69	3	1	9229.520422	9879.351967	23	39	73	22	26	3.57	102	116	75.14	31	5.77	29	30.3	140	281	1.162	3.8	141	10.26	2.3	3.698	70	1.84	5.4	0.8	1	1	22	116	140	3.8
117454	1	56	3	1	27194.44766	26257.71906	23	41	59	20	24	5	101	201	91.94	27	5.61	21	14.9	163	276	0.904	4	138	8.55	2.35	5.327	68	1.919	8.1	1.195	2	2	20	201	163	4
124665	1	65	2	1	5662.027944	6197.63522	23	40	75	15	26	6.78	103	183	113.15	33	6.72	37	16.3	143	292	1.033	4.1	145	5.13	2.6	3.543	73	1.626	8.5	1.461	2	2	15	183	143	4.1
115611	2	59	2	1	2833.28695	3003.518384	23	39	93	27	24	3.57	99	139	84.86	38	5.55	147	8.8	118	279	1.162	3.9	140	3.42	2.375	3.698	77	1.423	4.8	1.046	0	0	27	139	118	3.9
112387	1	59	2	1	11746.5204	13430.33705	23	42	93	17	29	4.64	97	168	71.6	31	12.66	67	13.3	130	281	1.195	4.1	137	5.13	2.35	5.715	73	3.353	5.9	1.033	NA	3	17	168	130	4.1
111800	2	58	2	1	25517.05009	25443.05822	23	46	99	28	26	3.93	100	102	62.76	28	4.61	27	18.6	152	276	1.292	3.8	139	6.84	2.45	5.275	74	0.587	3.4	0.855	2	2	28	102	152	3.8
117435	2	51	2	1	6455.569574	6837.300851	23	41	60	26	29	5	99	221	84.86	38	8.05	25	13.1	187	282	1.098	3.4	140	5.13	2.4	4.396	79	3.511	6.9	1.015	2	2	26	221	187	3.4
124282	2	80	1	1	28309.37589	41764.59093	23	38	89	24	29	6.78	96	107	64.53	32	6.55	22	22	157	275	1.421	4.4	136	8.55	2.275	5.612	70	1.727	6.6	0.947	0	0	24	107	157	4.4
124289	1	80	1	1	17684.58708	21321.29437	23	39	55	22	28	10.35	100	49	46.85	33	5.5	11	11.5	183	283	1.066	4.6	139	6.84	2.3	3.879	72	1.366	4.9	0.958	2	2	22	49	183	4.6
112226	1	76	1	1	17614.27054	21265.66661	23	43	48	25	28	6.78	96	153	86.63	27	6.61	38	21.7	139	275	1.195	4.2	136	8.55	2.45	3.026	70	1.231	6.4	0.985	NA	3	25	153	139	4.2
120293	2	75	1	1	53466.06406	56930.18065	23	37	117	22	26	10.71	97	85	96.36	32	5.33	81	17.2	169	280	1.195	3.7	137	5.13	2.35	4.422	69	2.619	8.4	1.1	2	2	22	85	169	3.7
111036	1	75	1	1	75264.87612	76556.04711	23	43	90	19	28	7.85	99	96	115.8	31	6.49	65	19.2	151	286	1.421	4	141	6.84	2.45	7.396	74	3.421	7.3	1.022	2	2	19	96	151	4
122953	1	66	1	1	77524.38098	81935.9657	23	40	123	27	23	5	104	517	95.47	32	5.77	68	19.3	199	278	0.71	4	139	8.55	2.225	4.5	72	1.964	6.6	1.496	2	2	27	517	199	4
120387	1	65	1	1	34450.92558	38475.19368	23	40	63	19	25	5	104	143	69.84	33	5.94	47	26.5	133	282	0.807	4.2	141	17.1	2.225	6.93	73	1.106	4.4	0.929	2	2	19	143	133	4.2
123711	2	64	1	1	20435.88077	21403.02079	23	40	81	25	25	7.14	100	100	79.56	31	8.27	18	16.7	96	283	1.162	3.9	139	6.84	2.225	5.534	71	2.484	6.5	1.055	1	1	25	100	96	3.9
117616	2	63	1	1	14526.42168	14445.66954	23	39	91	18	31	5	101	99	64.53	24	5.27	13	15.8	141	282	1.388	4	141	3.42	2.275	4.267	63	0.971	3.9	0.672	0	0	18	99	141	4
120831	1	60	1	1	62006.94832	70826.48981	23	41	71	21	25	6.43	105	50	80.44	26	5.22	31	17.9	149	288	1.292	4.6	144	10.26	2.375	7.06	67	3.5	5.7	1.154	2	2	21	50	149	4.6
111821	2	59	1	1	130874.374	141658.2756	23	41	81	30	28	6.07	101	89	72.49	22	4.88	56	17.7	160	284	1.195	3.9	142	8.55	2.425	5.508	63	0.508	4.5	1.001	2	2	30	89	160	3.9
124122	2	57	1	1	14352.69528	14370.28426	23	38	73	16	23	3.93	108	122	76.91	27	4.39	25	15.9	178	285	0.969	4.4	144	11.97	2.25	4.293	65	1.727	5.5	1.003	0	0	16	122	178	4.4
116984	2	56	1	1	44255.71613	49432.61256	23	39	76	20	25	9.28	103	266	70.72	34	6.33	10	10.2	181	289	1.292	3.9	142	6.84	2.325	3.853	73	1.05	4.4	1.313	2	2	20	266	181	3.9
118857	2	67	4	2	10773.87501	10795.09922	22	44	82	30	24	5.36	105	316	114.92	29	4.72	25	19	256	289	1.292	4.5	145	8.55	2.325	6.077	73	1.061	5.2	0.839	1	1	30	316	256	4.5
111315	2	63	4	2	14678.64489	15644.82721	22	42	49	17	23	5.71	106	106	50.39	27	6.77	19	10.2	134	282	1.13	4	140	3.42	2.4	4.112	69	1.637	4.3	0.904	NA	3	17	106	134	4
111322	2	62	4	2	7086.156919	7751.659737	22	48	41	25	25	2.5	101	134	54.81	30	5.27	25	16.7	202	279	1.098	4.1	141	6.84	2.475	6.517	78	3.105	3.6	0.885	1	1	25	134	202	4.1
113616	1	66	3	2	7361.710231	7815.550723	22	39	96	19	28	6.07	99	82	83.98	27	4.94	25	16.3	157	279	0.969	4.4	139	6.84	2.25	3.931	66	0.779	4.9	1.224	1	1	19	82	157	4.4
115095	1	50	3	2	9513.37121	9728.667337	22	40	106	19	28	2.86	102	112	86.63	31	4.88	24	19.3	136	281	1.421	4.3	142	11.97	2.225	3.155	71	0.937	4.5	0.835	0	0	19	112	136	4.3
114324	2	70	3	2	14695.71987	16466.74392	22	39	72	22	25	3.93	102	60	61.88	25	4.94	13	29	138	276	1.227	3.5	139	15.39	2.225	4.732	64	1.264	3.5	0.757	0	0	22	60	138	3.5
110861	2	67	3	2	8347.997502	8903.976298	22	44	99	18	26	5.36	100	86	55.69	29	4.72	18	18.6	172	283	1.066	3.9	142	5.13	2.375	6.698	73	1.964	4.9	0.73	0	0	18	86	172	3.9
110638	1	60	3	2	12781.28148	14038.3978	22	40	136	18	28	8.57	96	176	76.91	35	5.55	18	11.8	218	282	1.292	4.3	139	8.55	2.325	4.319	75	4.177	7.5	1.067	0	0	18	176	218	4.3
122842	2	57	3	2	11600.16109	11969.7741	22	43	75	23	25	4.28	99	386	64.53	25	5	37	10.6	191	277	1.162	3.6	139	5.13	2.175	5.612	68	0.745	4.4	1.057	0	0	23	386	191	3.6
122928	2	50	3	2	16363.23413	16598.82088	22	38	89	21	28	7.5	101	91	56.58	30	5.05	24	7.5	163	284	1.13	3.8	141	10.26	2.225	5.017	68	1.287	3.2	0.835	NA	3	21	91	163	3.8
113326	1	59	2	2	6692.51095	7014.683848	22	42	134	19	26	3.21	100	359	83.1	30	5.11	59	17.4	162	281	1.227	4	142	18.81	2.35	5.301	72	1.423	8.4	1.012	0	0	19	359	162	4
115791	1	63	2	2	6703.002039	7133.143109	22	41	67	20	27	5.36	101	220	90.17	30	5.55	27	8.6	137	280	1.066	4.1	140	6.84	2.4	5.844	71	1.694	6	1.415	2	2	20	220	137	4.1
111804	2	60	2	2	12050.33429	12643.11416	22	40	175	12	27	5.36	97	71	50.39	28	15.71	30	13.8	153	285	1.195	3.6	137	15.39	2.25	4.862	68	1.716	3.8	0.995	0	0	12	71	153	3.6
109519	1	55	2	2	6322.129646	6662.805656	22	35	56	14	25	6.78	99	342	71.6	28	6.61	37	18.1	132	277	1.066	4.4	137	5.13	2.225	6.62	63	1.411	7.3	1.254	0	0	14	342	132	4.4
124556	1	54	2	2	18148.60786	19549.65992	22	38	43	29	24	7.14	103	741	116.69	38	7.66	27	15.2	147	282	1.195	4.3	139	8.55	2.2	3.75	76	0.869	6	1.151	2	2	29	741	147	4.3
122493	2	52	2	2	10488.18448	11526.38647	22	24	147	16	25	9.28	103	95	111.38	40	2.72	56	6.6	196	287	1.744	3.2	143	1.71	2.125	4.888	64	3.94	7.1	1.156	NA	3	16	95	196	3.2
117241	1	51	2	2	15571.18843	16317.67515	22	39	81	17	23	4.64	105	201	94.59	25	5.55	42	14.5	123	287	1.13	3.9	144	6.84	2.275	3	64	2.303	5.4	1.156	0	0	17	201	123	3.9
123042	2	50	2	2	6739.330874	7137.841548	22	36	70	19	24	5	103	125	73.37	36	4.33	47	17	161	275	0.872	4.2	138	5.13	2.2	4.474	72	1.276	4.1	1	0	0	19	125	161	4.2
118322	2	80	1	2	18091.03832	21610.03089	22	36	98	34	24	11.78	103	66	102.54	43	10.66	59	12.4	186	292	1.066	4.4	140	13.68	2.325	3.336	79	1.648	7.2	1.213	0	0	34	66	186	4.4
115570	2	80	1	2	21908.63184	23619.59959	22	45	77	21	26	5.36	99	68	86.63	25	5.77	19	22.4	155	281	1.195	3.9	140	8.55	2.5	8.12	70	1.377	4.2	0.955	0	0	21	68	155	3.9
115247	2	80	1	2	36636.6536	43196.1805	22	41	82	19	24	5	104	84	92.82	27	5.61	37	12.2	156	286	1.033	4.1	143	3.42	2.35	5.974	68	1.614	7	0.755	2	2	19	84	156	4.1
120300	2	71	1	2	13752.54667	16026.9687	22	42	76	18	27	5.36	103	66	61	27	5.61	32	7.5	150	288	1.227	4	144	10.26	2.225	6.129	69	2.461	8.6	0.934	0	0	18	66	150	4
122766	2	64	1	2	29480.29113	30156.38763	22	37	110	16	25	6.43	103	78	86.63	26	5.27	16	11.3	153	281	1.292	4.6	140	3.42	2.125	5.198	63	3.105	6.1	1.188	0	0	16	78	153	4.6
110941	2	59	1	2	99598.42139	107537.1918	22	40	53	22	24	5.36	97	119	71.6	30	4.94	30	19.7	154	274	1.13	4.5	137	6.84	2.275	5.25	70	2.258	4.9	0.871	2	2	22	119	154	4.5
116153	2	57	1	2	16224.47869	17804.55385	22	42	95	20	27	4.28	106	96	64.53	25	4.83	31	18.3	183	286	1.324	4.1	144	8.55	2.325	4.138	67	0.79	3.5	0.598	0	0	20	96	183	4.1
111501	1	56	1	2	34436.51335	38293.33355	22	47	73	18	26	7.14	99	67	87.52	26	7.05	23	10	143	280	1.195	4.2	138	8.55	2.475	3.517	73	2.145	4.4	1.2	2	2	18	67	143	4.2
113155	2	54	1	2	64712.46835	72602.09835	22	37	88	17	25	3.93	104	142	61	30	6.16	29	13.3	171	287	1.001	3.8	144	6.84	2.3	4.112	67	1.287	7.5	1.212	0	0	17	142	171	3.8
113013	2	73	4	1	11299.17389	12413.28983	22	39	89	20	28	6.78	99	79	62.76	30	5.11	17	14.5	176	281	1.195	3.6	140	8.55	2.4	4.629	69	2.969	5.5	1.08	0	0	20	79	176	3.6
121949	2	71	4	1	12880.74703	14726.12528	22	42	69	NA	26	4.64	96	72	61	27	5.33	12	26.1	NA	272	1.195	4.1	136	18.81	2.35	5.793	69	1.569	4.8	0.747	2	2	22	72	164	4.1
116503	1	69	4	1	8292.427086	8978.647879	22	43	69	19	26	6.78	101	54	76.02	35	7.66	37	20.6	140	286	0.969	4.7	141	10.26	2.45	3.982	78	1.411	6.6	0.777	NA	3	19	54	140	4.7
122189	2	68	4	1	17525.47	18369.20337	22	36	124	26	28	8.21	100	168	80.44	44	5.61	52	12.4	180	283	1.162	3.8	140	6.84	2.2	5.637	80	1.14	5.9	0.743	2	2	26	168	180	3.8
115752	1	67	4	1	4051.159249	4453.60884	22	44	84	20	28	6.07	98	98	72.49	31	7.05	19	15.4	158	283	0.807	3.4	140	23.94	2.45	4.526	75	1.197	5.2	0.879	0	0	20	98	158	3.4
115547	2	64	4	1	17878.69653	18739.43537	22	40	155	26	22	6.07	101	111	67.18	36	6.27	67	10.4	174	280	1.098	3.9	139	6.84	2.175	4.681	76	1.05	6.2	0.544	NA	3	26	111	174	3.9
118565	2	53	4	1	18552.03095	20677.06331	22	37	110	23	28	7.85	103	134	46.85	32	5.16	11	23.8	173	286	1.259	4.1	142	8.55	2.3	6.206	69	1.027	4.9	0.868	0	0	23	134	173	4.1
123336	2	52	4	1	7538.386243	7732.938475	22	41	95	21	29	3.93	102	124	54.81	30	4.16	10	27.6	148	283	1.292	3.8	143	8.55	2.2	5.56	71	0.553	3.7	0.778	0	0	21	124	148	3.8
123077	1	50	4	1	9898.436917	10757.38497	22	42	92	20	26	4.28	103	126	76.91	28	5	33	18.8	172	288	1.066	3.8	145	11.97	2.325	6.568	70	0.926	4.1	0.799	2	2	20	126	172	3.8
124670	2	80	3	1	6808.638127	7556.800135	22	49	74	30	29	9.64	98	163	99.89	25	5.55	11	14.3	228	288	1.259	4.4	142	5.13	2.625	3.776	74	1.31	4.8	0.942	0	0	30	163	228	4.4
118437	1	66	3	1	6235.798836	6968.616521	22	42	84	21	27	6.78	100	294	82.21	30	6.83	22	25.6	166	285	0.807	4.1	141	11.97	2.225	5.431	72	1.231	8.4	0.756	NA	3	21	294	166	4.1
123040	1	64	3	1	4324.1057	4662.761535	22	46	64	19	26	5.36	99	90	76.02	27	4.61	37	11.6	133	276	1.001	4.1	138	5.13	2.325	5.482	73	1.739	5.4	1.1	0	0	19	90	133	4.1
115583	1	63	3	1	16020.56647	17527.33193	22	36	74	19	24	5.71	101	65	95.47	29	4.77	21	12.2	163	282	1.033	4.5	141	8.55	2.175	4.293	65	1.513	6.3	1.181	2	2	19	65	163	4.5
116077	1	57	3	1	34309.03302	34434.51499	22	41	90	18	23	6.78	102	107	84.86	25	4.55	28	15	134	277	1.098	4	138	10.26	2.25	5.741	66	4.482	6.4	1.002	2	2	18	107	134	4
122223	1	57	3	1	32341.60152	32843.36551	22	38	49	21	24	5	105	241	69.84	26	7.05	29	19.2	120	285	1.066	4	142	5.13	2.2	5.069	64	0.982	5.8	0.974	2	2	21	241	120	4
115305	2	54	3	1	16119.44751	15773.1402	22	41	116	17	23	5.71	104	132	45.08	29	5.33	82	13.3	109	280	1.324	4.2	140	1.71	2.275	4.913	70	2.676	5.4	0.92	2	2	17	132	109	4.2
116066	1	74	2	1	10585.81552	10868.78013	22	41	87	28	24	4.64	103	338	135.25	32	5.11	22	11.5	163	277	1.098	4.2	139	13.68	2.35	7.008	73	1.468	5.2	1.268	1	1	28	338	163	4.2
121115	1	72	2	1	4481.458164	4534.860382	22	39	59	19	25	8.93	109	192	186.52	33	3.5	19	11.8	186	293	1.066	4.4	146	8.55	2.25	3.801	72	2.269	8.5	1.191	0	0	19	192	186	4.4
116144	1	67	2	1	4926.872695	5272.118801	22	44	62	19	29	8.57	105	253	105.2	29	5.72	42	19.7	150	286	1.324	3.8	141	6.84	2.425	3.543	73	0.892	8.2	1.358	0	0	19	253	150	3.8
116762	2	61	2	1	14008.87741	14840.417	22	43	103	20	30	6.43	101	92	69.84	34	5.55	56	9.1	126	291	1.55	3.7	145	3.42	2.525	5.87	77	1.332	3.4	1.147	1	1	20	92	126	3.7
121618	2	54	2	1	24044.66183	24522.21169	22	34	72	16	32	3.93	100	87	39.78	36	9.49	85	14.7	142	281	1.227	3.5	139	5.13	2.275	6	70	1.298	6.5	1.105	0	0	16	87	142	3.5
124420	1	80	1	1	8195.905142	9494.518219	22	40	64	16	26	11.78	98	86	105.2	23	6.66	13	23.3	166	279	1.195	4.7	135	6.84	2.225	3.284	63	1.377	5.2	1.18	1	1	16	86	166	4.7
121494	1	80	1	1	8472.085855	9578.641616	22	38	86	20	24	5.36	104	93	86.63	28	8.99	48	15	141	287	1.227	4.6	142	8.55	2.3	6.077	66	1.705	5	1.062	NA	3	20	93	141	4.6
121588	1	80	1	1	13933.67082	15833.47741	22	34	67	21	29	11.78	92	21	104.31	36	6.16	18	6.8	151	282	1.324	4	137	8.55	2.3	3.62	70	1.795	7.6	0.816	2	2	21	21	151	4
110273	2	75	1	1	35039.50488	41682.12639	22	38	66	18	23	6.43	98	74	93.7	28	5.94	19	8.4	139	271	1.324	4	134	3.42	2.275	4.215	66	1.558	7.8	1.012	2	2	18	74	139	4
119040	2	73	1	1	47594.58611	56817.53228	22	41	47	20	25	7.14	102	65	75.14	29	5.61	18	15.9	153	284	1.033	5.1	141	6.84	2.4	4.707	70	0.756	5.2	0.853	1	1	20	65	153	5.1
115983	2	72	1	1	13769.93703	16435.64782	22	41	72	25	24	5.36	105	275	71.6	31	6.38	15	14.9	229	289	1.259	4.3	144	5.13	2.325	5.637	72	1.321	4.5	1.088	2	2	25	275	229	4.3
119451	1	68	1	1	13261.66974	14017.52566	22	38	72	14	26	6.78	106	67	80.44	31	5.72	32	24.5	137	291	1.162	4.7	145	6.84	2.275	4.37	69	1.942	5.7	0.871	0	0	14	67	137	4.7
113152	2	65	1	1	98187.9788	105237.4756	22	42	38	24	31	7.14	100	77	68.95	26	5.61	14	20.8	182	291	1.259	3.6	145	6.84	2.35	5.146	68	1.705	5.3	1.133	2	2	24	77	182	3.6
109676	2	64	1	1	11606.14722	11652.15769	22	39	88	25	30	7.85	103	239	67.18	30	4.88	13	13.4	221	284	1.324	4.4	141	10.26	2.225	4.448	69	0.756	4.3	0.773	2	2	25	239	221	4.4
116303	2	64	1	1	46252.87618	46230.49093	22	42	112	20	25	5.36	100	60	68.95	29	7.27	14	9.9	156	280	1.292	4.3	139	5.13	2.325	5.715	71	2.1	4.3	0.694	2	2	20	60	156	4.3
116569	1	63	1	1	45899.28165	50146.56964	22	39	79	25	25	6.07	105	201	108.73	26	5.38	34	16.1	174	290	0.936	4.6	145	6.84	2.225	4.758	65	0.847	6.6	0.904	2	2	25	201	174	4.6
113943	1	62	1	1	38576.35154	43082.51729	22	45	68	24	25	7.14	99	150	96.36	26	4.44	22	10.9	192	285	1.421	3.9	142	6.84	2.375	5.043	71	3.263	5.2	1.024	2	2	24	150	192	3.9
115669	2	59	1	1	141297.8766	139449.699	22	44	86	17	28	5.71	100	80	51.27	29	4.83	28	12.2	191	282	1.066	4.1	141	3.42	2.45	4.681	73	1.298	4.4	0.986	2	2	17	80	191	4.1
109558	1	57	1	1	51010.86099	56402.61349	22	39	92	21	22	4.64	96	113	66.3	30	21.04	24	21.7	164	286	1.259	4.3	135	17.1	2.125	3.491	69	3.647	4.7	1.188	2	2	21	113	164	4.3
109608	2	54	1	1	40475.82511	43166.43326	22	45	106	27	21	6.78	104	62	76.02	25	5.22	43	18.3	123	278	1.388	3.8	138	5.13	2.3	5.405	70	0.565	3.4	0.832	2	2	27	62	123	3.8
113553	2	50	1	1	80465.24129	87264.68847	22	39	75	18	23	5	103	94	68.07	27	5.72	75	8.6	148	282	1.259	4.2	141	3.42	2.3	5.275	66	3.06	5.3	1.004	2	2	18	94	148	4.2
122235	1	50	1	1	78312.94498	82762.04517	22	41	56	20	27	6.78	102	180	82.21	31	5	23	23.1	128	281	1.066	4.5	140	11.97	2.3	5.663	72	2.393	6	1.156	2	2	20	180	128	4.5
119450	1	67	4	2	7767.943261	8349.207424	21	36	86	18	30	3.93	101	132	93.7	26	5.11	19	18.3	168	286	1.356	4.3	144	3.42	2.2	5.275	62	0.768	3.9	0.744	0	0	18	132	168	4.3
118620	2	77	4	2	16707.12899	18300.28842	21	40	92	22	26	6.43	100	166	59.23	31	4.77	16	10.7	169	282	1.292	3.1	141	6.84	2.35	4.965	71	0.768	4.5	0.901	2	2	22	166	169	3.1
119636	2	64	4	2	4835.628205	5050.75021	21	44	97	18	27	5.36	102	159	80.44	31	5.05	29	17.4	172	291	1.033	3.6	146	5.13	2.4	5.275	75	0.79	4.2	0.89	0	0	18	159	172	3.6
123951	2	62	4	2	8655.81621	9791.614205	21	40	62	24	25	6.07	103	150	72.49	34	5.55	53	16.3	174	288	1.259	4	144	5.13	2.35	6.232	74	1.456	5.9	1.094	2	2	24	150	174	4
109292	1	58	4	2	15941.778	17463.11289	21	39	49	18	24	3.93	102	250	83.98	30	9.71	34	20.8	148	283	0.743	4.8	140	6.84	2.325	4.448	69	1.174	7.6	1.121	0	0	18	250	148	4.8
115474	1	62	3	2	17077.48225	18755.47553	21	42	69	20	24	3.93	103	150	99.89	34	6.88	39	19.3	146	286	1.356	4.3	143	6.84	2.35	4.422	76	1.287	5.6	0.959	0	0	20	150	146	4.3
110712	2	59	3	2	15191.6651	14961.50814	21	39	130	18	26	5.71	105	59	42.43	30	5.22	30	25.3	146	290	1.098	4.2	145	8.55	2.325	4.732	69	0.982	2.6	0.735	0	0	18	59	146	4.2
118350	2	56	3	2	15129.31046	15247.91553	21	43	85	27	25	5	98	131	59.23	29	5	14	17.4	220	276	1.195	4.2	138	6.84	2.375	4.784	72	1.219	3.9	0.869	2	2	27	131	220	4.2
113001	2	51	3	2	6417.564555	6544.072238	21	40	38	24	28	7.14	106	125	90.17	19	4.88	20	26.1	152	293	1.13	3.5	146	3.42	2.35	5.069	59	0.892	4.2	0.774	2	2	24	125	152	3.5
117359	1	59	2	2	24798.65035	26642.70353	21	40	76	20	23	4.28	105	326	86.63	34	6.05	120	15.9	159	287	0.936	4.3	144	8.55	2.225	3.853	74	1.558	9.2	1.128	0	0	20	326	159	4.3
112315	2	55	2	2	24834.84931	25958.73558	21	42	70	24	26	4.28	105	538	64.53	34	4.5	17	15.8	193	284	0.872	3.9	143	10.26	2.375	6.724	76	1.423	7.2	1.042	0	0	24	538	193	3.9
116616	1	52	2	2	28083.0656	30239.19588	21	39	68	16	28	4.28	102	290	95.47	29	6.55	19	12.9	124	278	1.001	4.5	139	6.84	2.3	5.043	68	0.971	6.3	1.082	0	0	16	290	124	4.5
121321	1	63	2	2	3446.100466	3636.622251	21	38	46	17	29	5.71	99	123	80.44	28	5.66	23	19.2	112	275	1.259	4.2	137	5.13	2.3	4.836	66	2.258	5.1	1.111	NA	3	17	123	112	4.2
120879	2	61	2	2	5102.885154	5433.874981	21	44	57	NA	26	3.93	100	113	61	35	4.88	83	19.5	NA	280	1.292	4.7	141	8.55	2.45	5.456	79	0.644	3.1	0.824	1	1	22	113	164	4.7
115485	2	54	2	2	8361.031121	9181.998731	21	36	124	20	26	7.14	105	61	113.15	32	5.61	78	12.4	205	291	1.292	4.4	145	8.55	2.175	4.707	68	0.677	7.6	1.468	0	0	20	61	205	4.4
117238	1	53	2	2	5110.429439	5394.661453	21	40	80	34	28	7.85	102	695	99.01	31	4.88	40	19.2	158	290	1.195	4.5	144	3.42	2.375	5.431	71	1.106	6.9	1.131	0	0	34	695	158	4.5
120968	1	70	1	2	35902.32682	38756.18427	21	39	95	18	23	6.07	102	179	100.78	30	6.44	19	9.7	123	284	1.647	3.7	141	3.42	2.425	4.836	69	2.235	6.9	0.937	2	2	18	179	123	3.7
123085	1	60	1	2	12736.61449	13170.41116	21	39	127	19	26	4.28	98	65	94.59	36	7.33	35	18.1	148	281	1.292	4	140	13.68	2.3	4.5	75	1.355	7.2	1.478	0	0	19	65	148	4
119695	2	80	1	2	15637.88957	18556.69857	21	42	61	28	24	4.64	102	172	83.1	27	4.72	13	19.5	172	277	1.066	4	139	11.97	2.45	5.534	69	1.411	5.7	0.826	2	2	28	172	172	4
110372	1	78	1	2	6076.210785	7053.932286	21	38	83	16	18	12.14	89	40	127.3	36	27.14	25	17.4	NA	285	1.162	4.7	127	6.84	2.375	6.568	74	8.366	5.6	1.238	0	0	16	40	164	4.7
119083	2	63	1	2	16060.71626	15179.91718	21	40	130	17	24	7.85	102	85	113.15	32	5.44	22	10.2	169	283	1.227	4.2	140	3.42	2.4	4.189	72	1.931	3.7	1.02	0	0	17	85	169	4.2
122945	2	63	1	2	26264.81056	25754.34608	21	41	80	24	29	4.28	101	43	64.53	25	5.27	23	36.2	150	283	1.195	4.5	142	10.26	2.375	5.431	66	1.197	4.4	0.886	2	2	24	43	150	4.5
115142	1	63	1	2	20346.86519	20695.0963	21	36	88	20	23	3.93	99	36	74.26	34	5.27	23	8.4	161	273	1.324	4.5	137	5.13	2.325	5.948	70	2.224	4.9	1.058	0	0	20	36	161	4.5
116898	2	61	1	2	62957.31625	63594.53241	21	41	99	18	30	4.28	105	103	59.23	35	5.11	19	7.9	186	290	1.13	4	146	3.42	2.3	4.888	76	0.576	3.9	1.193	2	2	18	103	186	4
124246	2	61	1	2	134985.8362	134357.2671	21	40	28	24	28	6.43	96	75	85.75	28	5.27	35	25.1	125	274	1.388	4.2	136	10.26	2.425	4.5	68	1.344	7	1.046	2	2	24	75	125	4.2
120462	2	61	1	2	212300.5316	233967.3628	21	43	85	21	28	5.71	101	139	81.33	25	5.22	14	13.4	211	282	1.485	4.2	141	6.84	2.25	4.034	68	0.734	3.4	0.829	2	2	21	139	211	4.2
120885	1	69	4	1	19402.1853	20551.13546	21	48	65	23	26	7.85	98	239	106.96	33	5.66	22	17.9	141	277	1.292	4.1	137	15.39	2.35	4.344	81	1.434	6.6	1.021	0	0	23	239	141	4.1
119237	2	67	4	1	6497.621783	6888.76988	21	45	102	25	25	3.57	92	178	52.16	34	4.55	13	14	173	261	1.098	3.5	131	5.13	2.35	4.888	79	1.75	4.2	0.814	2	2	25	178	173	3.5
117037	1	61	4	1	8618.204531	9049.670448	21	42	71	19	23	6.07	101	213	77.79	30	5.94	35	15	171	280	1.033	4.1	139	5.13	2.325	4.991	72	2.032	8.4	0.918	1	1	19	213	171	4.1
112499	1	57	4	1	7984.64257	9062.901601	21	43	64	22	25	4.28	102	158	82.21	27	5.38	13	27.8	130	281	1.259	4.3	141	11.97	2.35	4.551	70	1.208	5.7	0.951	0	0	22	158	130	4.3
122375	1	57	4	1	13521.1678	13829.89984	21	43	73	18	26	5.71	101	101	57.46	29	4.27	15	30.3	154	281	1.162	4.1	141	5.13	2.325	5.974	72	1.4	6.5	0.805	0	0	18	101	154	4.1
116270	1	55	4	1	26271.07605	29028.14589	21	41	75	20	26	6.43	102	128	98.12	29	6.33	19	12.2	131	278	1.098	4.1	138	13.68	2.325	4.965	70	2.032	7	1.004	2	2	20	128	131	4.1
114293	1	54	4	1	7754.315879	8244.193326	21	39	83	17	26	5.71	100	121	54.81	36	6.11	28	26	128	281	0.872	3.6	140	11.97	2.175	4.784	75	1.253	6.1	1.181	0	0	17	121	128	3.6
118713	1	54	4	1	14391.67176	16049.42274	21	42	77	19	26	7.85	104	141	98.12	32	6.61	62	19.2	138	288	1.033	4.6	142	10.26	2.25	3.207	74	0.711	6.4	0.845	2	2	19	141	138	4.6
121126	2	53	4	1	9459.712422	9935.424156	21	42	74	22	25	5	101	59	53.04	30	4.77	49	10.4	136	279	1.292	3.9	140	1.71	2.375	6.284	72	1.411	3.1	0.918	2	2	22	59	136	3.9
116374	1	52	4	1	8302.18385	8477.349472	21	45	57	18	27	5.36	99	113	74.26	30	4.77	14	26.9	156	278	1.033	4.3	139	10.26	2.325	5.974	75	2.224	6.7	0.988	NA	3	18	113	156	4.3
122664	1	52	4	1	4153.522447	4542.292464	21	39	66	29	27	6.43	101	337	113.15	33	4.66	20	9.1	143	282	1.388	4.3	141	5.13	2.425	5.689	72	2.405	7.9	0.818	2	2	29	337	143	4.3
111377	1	51	4	1	24386.03774	25630.12875	21	36	117	19	28	5.36	100	266	74.26	39	5.16	33	13.8	136	282	1.195	4.1	141	8.55	2.35	5.612	75	1.49	8.4	1.064	2	2	19	266	136	4.1
113461	1	51	4	1	5947.10338	6689.387802	21	42	81	22	24	3.93	103	220	90.17	29	4.55	29	12.5	149	280	1.324	4.2	141	3.42	2.1	3.801	71	1.942	5.3	0.98	2	2	22	220	149	4.2
118087	1	51	4	1	19195.80272	19352.52658	21	45	80	20	24	4.64	101	150	86.63	29	5.16	30	21.9	159	274	1.13	4.2	137	13.68	2.45	6.879	74	2.732	7.9	0.941	2	2	20	150	159	4.2
112375	1	50	4	1	12061.59157	13450.94477	21	37	58	17	26	4.28	101	109	74.26	29	5.66	20	24.5	135	274	0.969	4.2	137	6.84	2.175	4.344	66	1.953	6.9	1.101	2	2	17	109	135	4.2
123324	1	65	3	1	6160.505679	6251.238822	21	45	56	21	26	7.85	97	59	99.89	35	9.16	37	26.7	156	279	0.84	4	136	20.52	2.375	2.87	80	1.073	5.4	1.383	0	0	21	59	156	4
123890	1	60	3	1	21202.09088	23801.64128	21	36	54	26	23	4.64	103	113	73.37	32	6.27	24	16.3	142	277	1.066	4	138	11.97	2.2	1.965	68	0.768	6.4	1.431	2	2	26	113	142	4
111621	1	60	3	1	4977.366703	5592.647685	21	42	96	28	30	8.57	102	238	113.15	31	4.77	16	10.6	147	290	1.195	4.4	144	8.55	2.375	6.077	73	3.895	6.6	1.127	2	2	28	238	147	4.4
123203	2	57	3	1	12027.25259	11803.30301	21	39	80	22	28	6.07	103	283	58.34	30	4.44	21	22	255	287	1.324	3.8	144	6.84	2.425	7.396	69	1.423	6	0.811	2	2	22	283	255	3.8
124108	1	56	3	1	5968.65417	6411.955892	21	43	94	18	25	5	99	108	58.34	31	11.27	29	13.1	149	282	1.001	3.7	138	5.13	2.2	5.431	74	1.998	3.7	1.082	1	1	18	108	149	3.7
112589	1	75	2	1	7766.4081	8144.342941	21	40	49	23	24	10.35	102	350	103.43	29	5.22	17	11.3	150	281	1.098	3.8	138	3.42	2.35	2.922	69	0.892	6.4	1.107	2	2	23	350	150	3.8
110673	1	69	2	1	5126.470849	5377.689445	21	39	89	18	26	4.64	104	98	70.72	32	6.16	84	8.4	153	291	1.098	4.4	146	10.26	2.375	2.638	71	0.598	7.4	1.169	2	2	18	98	153	4.4
110959	1	63	2	1	7514.704996	7755.238721	21	42	78	19	29	3.93	100	305	81.33	35	5.33	17	13.3	184	279	1.259	4.5	140	6.84	2.45	4.732	77	3.06	5.7	0.961	NA	3	19	305	184	4.5
123646	2	62	2	1	10923.79438	11635.85995	21	41	46	20	25	9.64	103	259	91.05	29	5.05	23	12	187	286	1.195	3.3	141	5.13	2.325	5.741	70	0.756	5.5	1.16	2	2	20	259	187	3.3
123090	2	58	2	1	18417.39366	20238.46522	21	42	94	20	29	4.28	97	252	91.05	29	4.61	29	9.7	182	280	1.066	3.3	141	5.13	2.425	6.698	71	2.563	7.6	1.171	2	2	20	252	182	3.3
117067	2	58	2	1	15151.23278	17886.59674	21	43	77	21	25	3.57	101	140	64.53	38	4.5	39	16.5	162	281	1.388	3.8	142	15.39	2.35	4.474	81	2.021	4.7	1.016	0	0	21	140	162	3.8
109930	1	51	2	1	12989.21355	14124.50678	21	40	76	18	26	4.64	102	171	78.68	35	6.66	43	13.4	162	283	0.936	3.9	141	6.84	2.3	4.758	75	1.039	5.1	1.031	2	2	18	171	162	3.9
121209	2	50	2	1	9196.064167	10510.25887	21	43	57	25	25	3.57	101	73	50.39	33	4.72	24	12.5	189	280	1.259	3.9	141	8.55	2.375	5.612	76	0.948	3.3	1.192	NA	3	25	73	189	3.9
122425	1	80	1	1	18728.54787	22214.73292	21	42	54	37	23	8.21	102	134	143.21	30	4.33	52	14	NA	282	1.033	4.1	140	5.13	2.225	6.155	72	5.487	8.8	1.218	NA	3	37	134	164	4.1
113528	1	79	1	1	21967.43872	21870.61524	21	33	82	17	25	6.07	101	62	101.66	24	18.93	28	11.3	240	291	1.033	4.7	138	8.55	2.175	4.06	57	4.324	5.4	1.103	1	1	17	62	240	4.7
118796	1	77	1	1	17785.19016	19729.09873	21	42	70	25	26	8.93	100	269	102.54	33	3.94	20	13.1	174	286	1.162	4.7	142	11.97	2.3	4.06	75	1.535	6	1.426	2	2	25	269	174	4.7
124811	1	76	1	1	55360.9904	62778.76814	21	36	206	28	23	7.85	101	41	84.86	35	5.38	93	35.1	147	279	1.259	4.6	138	11.97	2.25	3.879	71	1.682	3.9	0.803	2	2	28	41	147	4.6
120049	1	75	1	1	8474.881163	9012.633957	21	45	44	22	28	6.43	99	116	82.21	25	5	20	23.3	177	279	1.098	4.2	139	8.55	2.45	5.663	70	1.445	6.4	1.022	0	0	22	116	177	4.2
117727	2	74	1	1	51113.92478	58968.90538	21	48	87	15	23	7.5	95	122	92.82	26	4.66	29	16.5	223	274	1.098	3.7	136	6.84	2.425	4.215	74	1.468	4.4	0.995	2	2	15	122	223	3.7
113971	1	71	1	1	44113.49153	47061.22991	21	41	70	22	30	7.14	97	169	102.54	21	4.83	15	19.7	156	278	1.227	3.8	138	8.55	2.325	4.681	62	1.185	6.7	1.357	2	2	22	169	156	3.8
113367	1	68	1	1	45927.86105	49999.17389	21	41	77	18	21	8.21	106	77	121.11	28	8.16	19	12.2	133	291	1.195	5.8	143	6.84	2.375	3.051	69	1.874	9.1	1.174	2	2	18	77	133	5.8
124671	2	67	1	1	119580.9771	117483.8209	21	41	110	20	24	5.71	104	81	73.37	25	5.61	19	13.8	140	283	1.259	3.9	141	6.84	2.325	5.25	66	1.039	4.7	0.904	2	2	20	81	140	3.9
117335	1	66	1	1	22565.14545	23772.13117	21	40	79	19	26	6.43	102	97	76.02	35	6.88	16	13.3	129	286	1.259	4.2	142	17.1	2.3	2.767	75	0.779	5.2	1.38	1	1	19	97	129	4.2
121675	1	60	1	1	24521.34484	26397.3977	21	39	65	19	22	6.07	103	58	84.86	31	5.33	30	16.7	138	283	1.13	4.3	141	5.13	2.25	5.586	70	0.847	5.4	0.912	NA	3	19	58	138	4.3
110607	2	58	1	1	36967.63222	37626.30682	21	42	56	19	25	5	102	101	74.26	29	4.44	16	14.3	190	281	1.033	4	141	6.84	2.375	5.612	71	1.456	4.4	1.043	2	2	19	101	190	4
118563	1	57	1	1	65045.51184	70785.3475	21	41	92	23	22	9.28	101	185	103.43	37	4.27	31	20.2	180	283	1.421	4	140	6.84	2.525	6.232	78	5.566	6	1.059	2	2	23	185	180	4
120196	2	54	1	1	35337.24269	37536.53093	21	40	97	19	30	5	100	79	50.39	31	5	29	12	179	281	1.162	3.8	141	5.13	2.25	4.939	71	1.727	4.3	0.917	0	0	19	79	179	3.8
119961	1	51	1	1	34086.02547	39332.79042	21	43	53	23	27	5.36	102	80	71.6	32	5.22	42	24.7	154	289	1.324	5	145	8.55	2.425	6.905	75	1.648	4.8	1.039	2	2	23	80	154	5
122293	2	64	2	3	9024.554855	9139.898669	20	41	90	20	29	4.64	101	325	65.42	36	5.5	31	11.8	214	285	1.388	3.6	143	8.55	2.35	6.439	77	1.298	3.6	0.837	NA	3	20	325	214	3.6
122864	1	58	4	2	9389.659797	9875.775721	20	44	115	20	24	5.36	101	205	93.7	26	5.94	24	10.7	141	288	0.936	4	144	6.84	2.275	6.439	70	1.558	6	1.015	2	2	20	205	141	4
110723	1	73	4	2	8748.30274	8714.553536	20	41	98	23	29	6.07	100	49	71.6	35	5.11	31	26	147	286	1.066	4	143	8.55	2.375	5.405	76	1.005	5.6	0.938	2	2	23	49	147	4
111262	2	71	4	2	11399.75942	11867.89688	20	39	58	18	24	6.07	106	54	55.69	22	9.94	17	14.3	163	291	0.936	4.8	143	5.13	2.325	4.319	61	2.235	5.4	1.091	0	0	18	54	163	4.8
115091	1	62	4	2	4077.045311	4452.723183	20	41	82	18	28	5.71	104	116	68.95	30	4.94	12	11.1	166	289	0.904	3.7	145	3.42	2.375	4.138	71	2.845	5.9	1.147	1	1	18	116	166	3.7
119444	1	62	4	2	6884.151144	7327.188174	20	43	82	21	26	6.07	102	274	92.82	32	4.83	23	15.8	NA	284	1.001	4.3	142	8.55	2.375	5.353	75	0.835	5.2	1.074	2	2	21	274	164	4.3
118693	1	51	4	2	10655.70621	11336.77142	20	38	73	25	28	4.64	102	99	83.98	29	5.55	15	12	157	281	1.195	4.4	141	3.42	2.225	5.017	67	1.423	7	0.875	2	2	25	99	157	4.4
117020	2	50	4	2	11783.40726	12726.46113	20	42	115	23	26	6.43	100	129	77.79	28	4.61	17	10.9	140	277	1.324	4.2	138	1.71	2.35	4.681	70	0.948	4.6	0.981	1	1	23	129	140	4.2
112865	2	50	4	2	12840.94801	14047.00262	20	42	62	20	29	5.71	101	125	69.84	31	4.55	26	16.1	152	283	1.453	4.4	142	5.13	2.525	4.991	73	0.677	6	0.885	2	2	20	125	152	4.4
111382	1	60	3	2	12568.41444	13451.59729	20	40	67	15	23	6.07	100	66	99.89	31	4.72	28	17	132	276	1.001	4.1	138	5.13	2.325	5.715	71	3.082	7.1	0.831	0	0	15	66	132	4.1
113672	2	54	3	2	15012.28477	16081.06365	20	41	94	21	26	5	103	130	49.5	33	5.83	24	16.7	160	286	1.582	4.3	143	5.13	2.3	5.534	74	2.269	5.6	1.075	NA	3	21	130	160	4.3
121750	1	60	2	2	5099.917242	5370.623267	20	39	48	29	25	4.28	102	274	84.86	33	4.77	28	21.7	182	282	1.001	4.4	142	17.1	2.3	4.138	72	0.666	5.6	1.167	0	0	29	274	182	4.4
114919	2	58	2	2	16730.00066	17671.04823	20	36	58	19	23	5.71	110	329	68.07	32	6.55	23	11.6	159	289	1.066	4.3	144	3.42	2.25	4.422	68	1.027	6.1	1.382	1	1	19	329	159	4.3
118449	1	58	2	2	6494.498221	6774.103779	20	41	86	NA	27	4.28	105	202	74.26	34	4.44	45	19	NA	287	1.356	5.1	145	6.84	2.3	4.112	75	2.608	8.6	1.008	1	1	22	202	164	5.1
117431	2	53	2	2	23376.50745	24621.06789	20	36	127	14	20	4.64	103	67	57.46	37	10.21	27	7.2	128	279	0.936	4	137	3.42	2.5	4.603	73	1.569	4.9	1.03	2	2	14	67	128	4
118380	1	70	2	2	4333.211409	4620.722432	20	39	53	24	27	6.78	103	390	114.92	31	5.11	14	14.7	169	285	1.066	4.1	142	6.84	2.175	3.957	70	0.519	5.9	1.573	2	2	24	390	169	4.1
112621	2	62	2	2	2937.264144	2999.202828	20	43	123	20	27	4.64	101	80	66.3	29	4.83	27	19.2	150	273	1.001	4	137	5.13	2.3	4.215	72	2.111	5.5	0.782	2	2	20	80	150	4
110366	1	61	2	2	3329.81347	3449.55841	20	38	79	18	24	4.64	103	231	79.56	36	5.33	32	26.7	149	279	0.969	4.9	140	11.97	2.275	5.094	74	1.321	4.5	1.203	NA	3	18	231	149	4.9
124568	2	58	2	2	23210.86743	24283.03613	20	41	88	29	26	5.71	102	155	61.88	31	6.22	46	10	194	291	1.13	4.4	145	5.13	2.4	5.612	72	1.513	6.1	0.779	0	0	29	155	194	4.4
121822	2	57	2	2	9925.845017	10433.21927	20	42	76	21	28	4.28	99	184	77.79	29	4.22	16	10.4	160	278	1.001	3.9	140	5.13	2.425	5.25	71	2.01	3.4	0.828	2	2	21	184	160	3.9
112990	1	60	1	2	13735.60769	15476.46039	20	46	51	16	25	8.21	99	230	99.01	27	5.44	16	25.4	193	276	1.066	3.8	136	22.23	2.25	4.784	73	0.576	5.7	0.873	0	0	16	230	193	3.8
118382	1	80	1	2	5889.262054	7081.040506	20	40	131	23	25	6.07	106	37	106.08	24	5.5	26	16.1	148	288	1.356	4.1	144	10.26	2.2	3.388	64	0.994	6.6	1.336	2	2	23	37	148	4.1
118758	1	80	1	2	7955.07438	9211.495553	20	41	68	18	27	7.5	103	102	91.05	23	5.66	26	17.4	188	290	0.969	3.9	144	8.55	2.25	4.991	64	2.484	6.7	0.85	0	0	18	102	188	3.9
114148	2	78	1	2	25922.72544	28012.09684	20	40	93	26	30	6.07	100	93	61.88	29	5.83	16	14.5	245	285	1.324	3.8	142	6.84	2.3	4.681	69	0.982	4.4	0.989	2	2	26	93	245	3.8
115888	2	75	1	2	47662.65243	52999.07788	20	41	52	21	26	4.28	99	51	69.84	22	5.38	12	22.9	145	273	1.324	3.7	137	13.68	2.375	4.836	63	1.061	4.6	0.859	0	0	21	51	145	3.7
123574	1	70	1	2	36206.09062	41198.59241	20	41	86	24	24	3.93	102	91	75.14	31	5.33	13	19.3	171	279	1.098	4.2	140	10.26	2.325	3.827	72	1.231	5.6	1.037	2	2	24	91	171	4.2
119370	2	63	1	2	16060.71626	15179.91718	20	38	88	20	25	7.14	95	89	89.28	30	6.11	19	10.7	178	273	1.388	4.2	135	5.13	2.35	3.75	68	1.456	10.1	1.325	0	0	20	89	178	4.2
121796	1	57	1	2	16845.0445	18215.54743	20	39	70	28	22	2.5	95	106	74.26	30	6.05	72	8.8	108	267	0.904	3.8	134	5.13	2.225	3.465	69	2.089	4.5	1.156	2	2	28	106	108	3.8
121944	2	56	1	2	48753.26945	49589.57711	20	42	66	18	28	5	101	84	76.02	31	5.27	25	18.8	153	283	1.066	4.3	142	10.26	2.45	7.267	73	0.802	5.7	0.93	0	0	18	84	153	4.3
110165	1	54	1	2	12324.64626	12627.13082	20	40	78	19	26	3.93	100	165	78.68	30	5.27	13	17.2	127	275	1.001	4.4	138	10.26	2.375	4.707	70	2.416	7.5	1.401	2	2	19	165	127	4.4
115750	2	53	1	2	79383.93093	86530.58636	20	45	57	16	25	4.64	101	94	72.49	28	4.72	15	20.4	151	279	1.259	3.9	140	3.42	2.25	5.844	73	1.852	6	1.185	2	2	16	94	151	3.9
110461	1	50	1	2	57494.59207	63601.5105	20	39	77	22	29	3.57	96	150	78.68	33	3.94	40	22	172	273	1.227	3.8	138	8.55	2.275	6.258	72	2.653	6.6	1.207	0	0	22	150	172	3.8
115727	2	72	4	1	13287.55769	14664.32911	20	34	77	24	24	3.93	104	59	66.3	46	6.72	22	16.7	231	278	1.066	4.8	139	20.52	2.25	3.491	80	1.468	7.3	0.922	0	0	24	59	231	4.8
121465	1	71	4	1	30148.08899	32220.34581	20	40	69	21	25	6.78	104	127	87.52	26	6.44	32	14.7	172	286	0.936	4.1	142	8.55	2.2	2.664	66	1.411	5.1	1.243	2	2	21	127	172	4.1
119775	2	67	4	1	5784.903917	6443.329071	20	37	83	18	26	3.57	104	57	73.37	26	8.1	25	10.7	160	289	1.098	3.7	144	8.55	2.25	4.603	63	1.953	6.1	0.92	2	2	18	57	160	3.7
113775	2	67	4	1	13854.86252	14163.13931	20	40	71	26	28	5.71	104	140	53.92	33	5	19	11.1	184	282	1.13	4.4	141	5.13	2.325	7.163	73	1.061	3.2	0.835	1	1	26	140	184	4.4
111441	1	64	4	1	10372.83054	10562.76624	20	37	83	26	26	6.43	104	169	135.25	35	5.27	18	7.5	146	283	1.195	4.7	141	8.55	2.225	4.732	72	1.298	7	1.11	2	2	26	169	146	4.7
120307	1	64	4	1	8292.427086	8978.647879	20	43	102	24	25	5.71	100	130	81.33	28	5.11	9	15.9	NA	278	0.807	3.9	139	5.13	2.25	5.275	71	2.552	5.1	0.853	0	0	24	130	164	3.9
119563	1	62	4	1	9586.251326	9908.200386	20	43	67	15	27	7.85	104	125	90.17	28	4.83	24	19.9	93	290	1.388	4.1	144	15.39	2.325	5.327	71	2.789	6.4	1.184	2	2	15	125	93	4.1
119664	1	61	4	1	4588.556086	4821.344433	20	39	64	20	25	3.93	100	222	71.6	35	6.33	24	28.8	147	278	1.001	3.6	139	10.26	2.25	4.888	74	0.96	6.3	1.144	0	0	20	222	147	3.6
121410	2	60	4	1	6395.757548	6845.665966	20	41	87	19	27	3.21	101	134	50.39	37	5.61	21	9.7	148	278	1.162	3.9	140	15.39	2.3	4.732	78	1.852	4.1	0.892	1	1	19	134	148	3.9
112363	1	59	4	1	9985.429166	10514.11327	20	42	63	16	28	3.93	99	74	88.4	32	6	27	13.6	116	279	0.936	4.9	140	11.97	2.3	4.138	74	1.197	6.1	1.059	2	2	16	74	116	4.9
109940	2	57	4	1	13441.35766	15015.15354	20	42	84	21	27	5	102	92	50.39	32	4.88	68	17	133	279	1.066	3.8	140	5.13	2.35	5.896	74	1.694	4.3	0.89	0	0	21	92	133	3.8
112707	1	57	4	1	9609.290224	9732.311649	20	43	36	16	24	6.78	103	183	78.68	26	4.77	14	13.8	121	285	1.259	4.2	142	8.55	2.325	6.724	69	1.581	5.4	1.346	NA	3	16	183	121	4.2
113702	1	57	4	1	9624.545091	10205.14092	20	48	71	20	27	6.07	98	186	77.79	31	5.55	33	18.6	NA	279	1.13	3.9	139	8.55	2.475	6.568	79	6.379	8.1	1.128	2	2	20	186	164	3.9
116881	1	56	4	1	10277.51338	10897.4992	20	40	56	23	29	5	102	120	99.89	31	5.44	19	10.2	139	280	1.098	4.9	140	5.13	2.35	6.181	71	0.666	4.2	1.01	2	2	23	120	139	4.9
114254	2	54	4	1	11345.13729	11493.32164	20	38	71	25	26	3.93	106	156	54.81	25	4.83	12	19.7	185	284	1.292	4.6	143	11.97	2.175	5.043	63	1.908	4.5	0.91	2	2	25	156	185	4.6
121559	2	52	4	1	11813.4232	13790.37533	20	39	44	21	24	6.07	101	138	66.3	34	4.83	19	27.8	147	278	0.936	4.1	139	8.55	2.225	4.965	73	0.768	3.9	1.048	2	2	21	138	147	4.1
114409	2	50	4	1	23937.48222	27540.66491	20	44	58	17	28	6.43	100	195	53.04	32	10.88	24	10.4	124	296	1.356	3.9	145	10.26	2.575	5.431	76	2.969	4.5	1.178	NA	3	17	195	124	3.9
110144	2	50	4	1	5480.734953	5600.420487	20	38	86	16	26	3.93	98	78	53.92	33	19.43	16	12.7	157	289	1.324	4.5	138	6.84	2.25	5.87	71	1.389	5	1.144	NA	3	16	78	157	4.5
116345	2	50	4	1	7524.459973	7902.851381	20	42	47	27	25	6.78	102	97	69.84	37	5.33	56	10.2	138	287	1.324	3.5	143	3.42	2.45	5.12	79	2.156	3.9	0.973	2	2	27	97	138	3.5
109713	2	50	4	1	4559.336047	4452.282641	20	41	111	16	27	3.21	97	91	68.07	34	5.66	13	15.2	243	273	1.066	3.6	137	10.26	2.275	5.146	75	3.726	4.6	0.941	2	2	16	91	243	3.6
124071	2	50	4	1	11458.14341	11668.46657	20	41	54	16	27	2.14	101	89	51.27	29	6.55	22	13.3	158	280	1.001	3.9	141	8.55	2.2	5.172	70	1.174	3.7	0.87	0	0	16	89	158	3.9
113256	1	50	4	1	15907.78891	16991.41473	20	35	266	25	27	3.93	102	108	62.76	36	4.94	24	30.6	160	280	1.324	4.5	141	27.36	2.275	2.896	71	0.813	5.2	1.128	2	2	25	108	160	4.5
109591	1	68	3	1	5058.534693	5354.862547	20	43	70	19	28	5	100	114	71.6	32	5.44	19	8.4	128	282	1.033	4	141	5.13	2.35	4.448	75	1.648	5.8	0.917	0	0	19	114	128	4
114407	1	66	3	1	4127.555441	4450.817829	20	41	69	17	24	4.28	98	99	56.58	28	8.83	19	20.8	100	273	1.13	4	135	8.55	2.25	5.172	69	1.727	5.1	0.885	0	0	17	99	100	4
112265	1	61	3	1	6310.752692	6784.641328	20	43	87	38	26	8.57	104	54	79.56	21	6.27	13	37.4	NA	288	1.227	4.9	142	42.75	2.275	4.008	64	0.61	5.2	0.913	2	2	38	54	164	4.9
111901	1	57	3	1	7695.018805	8308.466828	20	45	116	20	28	4.64	95	219	47.74	28	13.54	51	16.7	171	288	1.195	3.6	140	10.26	2.175	6.155	73	1.027	4.8	1.295	0	0	20	219	171	3.6
112957	2	51	3	1	13524.57389	13773.48139	20	42	91	15	26	4.64	101	80	41.55	31	6.77	45	21.1	166	279	1.195	4	139	5.13	2.375	6.568	73	3.15	5.5	0.92	0	0	15	80	166	4
121178	1	72	2	1	11147.2588	11876.22667	20	43	61	20	28	4.64	101	108	79.56	36	5.88	17	9	150	280	1.324	3.9	140	11.97	2.4	3.517	79	0.824	4.4	1.034	2	2	20	108	150	3.9
116864	1	64	2	1	7035.143526	7433.373606	20	37	56	21	23	8.93	100	366	111.38	30	5.22	16	10.6	161	280	0.969	3.7	138	3.42	2.125	5.379	67	1.75	6.5	1.142	2	2	21	366	161	3.7
122146	1	60	2	1	6913.411232	7259.134412	20	43	60	23	24	6.78	101	138	114.92	32	6.11	37	19.2	128	282	1.162	4.2	140	8.55	2.4	7.137	75	2.19	5.8	1.28	2	2	23	138	128	4.2
124236	2	58	2	1	12355.86941	13403.3139	20	40	108	22	25	3.93	100	83	67.18	36	4.61	55	15.2	151	272	1.324	3.8	137	5.13	2.4	5.948	76	0.971	4.9	0.87	0	0	22	83	151	3.8
124563	1	55	2	1	19922.11166	21402.99463	20	46	86	16	27	5.71	103	195	81.33	26	5.61	20	12.2	NA	283	1.195	4.3	141	6.84	2.325	4.008	72	0.802	5.9	1.154	2	2	16	195	164	4.3
116157	2	52	2	1	12712.38213	13710.02442	20	41	62	25	27	6.78	102	251	76.02	34	4.61	17	19.7	195	285	1.388	3.7	142	6.84	2.5	6.051	75	0.565	3.6	1.004	NA	3	25	251	195	3.7
120376	1	50	2	1	8051.345167	8373.681418	20	39	78	27	24	5.71	103	520	71.6	39	4.77	42	12.9	NA	280	1.033	3.8	140	6.84	2.225	3.672	78	0.937	7.3	1.242	2	2	27	520	164	3.8
112467	1	80	1	1	7980.398223	9501.565618	20	39	75	23	26	12.5	101	145	121.11	40	6.94	13	24	225	294	1.162	4.4	143	6.84	2.45	4.215	79	1.761	9.3	1.294	0	0	23	145	225	4.4
118051	2	75	1	1	8298.904491	9039.101629	20	41	72	19	20	6.78	96	68	73.37	31	4.94	26	11.5	169	277	1.195	4.4	138	5.13	2.5	5.431	72	1.208	6.8	1.173	2	2	19	68	169	4.4
116447	1	75	1	1	75264.87612	76556.04711	20	41	84	19	26	7.14	104	143	94.59	24	4.88	13	25.6	190	285	1.162	4.4	142	37.62	2.275	4.163	65	1.344	5.7	1.25	2	2	19	143	190	4.4
122129	1	75	1	1	13647.79889	15091.85417	20	44	64	22	24	7.5	100	203	101.66	29	4.72	20	15.8	208	282	1.13	4.5	140	6.84	2.375	8.482	73	1.061	5.3	0.821	2	2	22	203	208	4.5
117217	1	73	1	1	7823.651788	8833.645187	20	36	86	24	23	5.71	106	272	72.49	31	4.61	13	12.5	220	282	1.292	4.5	141	6.84	2.275	2.819	67	0.519	7	1.013	0	0	24	272	220	4.5
121160	1	72	1	1	44208.84066	47072.20643	20	41	84	20	23	5.71	103	163	112.27	25	4.72	37	20.1	149	278	1.033	4.1	139	13.68	2.275	5.301	66	1.197	8.1	1.216	2	2	20	163	149	4.1
116607	2	69	1	1	77412.9382	79615.53093	20	40	59	22	26	4.28	98	77	67.18	34	6.27	22	18.4	148	276	1.033	3.7	138	10.26	2.35	5.844	74	1.411	7.1	1.102	2	2	22	77	148	3.7
117173	1	67	1	1	95631.42618	104015.3972	20	37	58	18	30	7.85	96	87	126.41	28	5.11	16	14	112	284	1.227	3.4	141	8.55	2.225	5.172	65	1.468	7.4	0.93	2	2	18	87	112	3.4
118039	2	66	1	1	19656.87984	20483.50775	20	41	86	28	27	5.71	101	44	65.42	34	5.27	12	9.5	152	286	1.324	4	143	8.55	2.3	5.301	75	1.84	4.6	0.776	1	1	28	44	152	4
120743	2	66	1	1	89362.12527	93091.73197	20	42	58	23	23	5.71	102	124	71.6	26	4.22	14	10	163	277	0.872	4.1	139	11.97	2.425	4.603	68	1.445	5.3	0.771	2	2	23	124	163	4.1
117882	1	62	1	1	138818.2156	154309.301	20	40	55	17	32	6.07	97	87	86.63	25	4.88	24	22.6	128	279	1.066	3.3	139	11.97	2.35	4.681	65	2.518	6.7	1.254	2	2	17	87	128	3.3
120388	2	61	1	1	75866.16215	85749.7076	20	43	65	20	26	5.36	101	770	56.58	33	4.66	12	14.9	274	278	1.162	4.3	139	6.84	2.4	5.534	76	1.231	5	0.991	2	2	20	770	274	4.3
123668	1	59	1	1	134572.9446	141926.2884	20	45	76	18	23	4.64	101	201	69.84	24	5.44	34	10.9	144	279	1.162	4.7	140	11.97	2.275	5.094	69	0.621	3.6	0.86	2	2	18	201	144	4.7
112028	2	55	1	1	62274.6187	62170.81518	20	40	67	25	25	4.64	103	166	77.79	28	5.11	21	12.5	198	279	1.162	4.3	140	3.42	2.25	4.939	68	1.073	3.7	1.03	0	0	25	166	198	4.3
115608	1	55	1	1	50570.50057	53962.42105	20	42	59	17	27	5.36	103	68	79.56	32	5.27	9	14.1	132	284	1.162	4.1	142	6.84	2.375	5.431	74	0.847	5.2	1.227	2	2	17	68	132	4.1
110841	1	54	1	1	58588.78755	62311.49009	20	41	91	16	23	4.28	104	60	84.86	28	4.88	21	14	171	280	1.001	4.5	141	6.84	2.2	4.655	69	1.874	6.4	1.246	2	2	16	60	171	4.5
109274	1	68	4	2	7227.993241	7801.600218	19	40	49	20	28	3.93	99	93	65.42	28	8.49	16	15.4	123	278	0.872	3.9	138	10.26	2.275	2.715	68	1.705	5.1	1.062	0	0	20	93	123	3.9
113292	1	59	4	2	24576.59166	25543.1905	19	38	87	25	28	4.64	100	287	64.53	35	5.05	21	21.5	160	283	0.936	3.9	142	11.97	2.275	4.991	73	1.208	7.1	1.013	2	2	25	287	160	3.9
119393	1	54	4	2	8099.572343	8938.797024	19	37	54	NA	25	3.93	102	137	66.3	30	12.88	33	9.9	NA	282	0.775	NA	138	1.71	2.175	8.844	67	19.961	4	0.966	0	0	22	137	164	4.1
117022	2	75	4	2	6408.793146	7049.710266	19	39	63	17	30	3.57	103	82	56.58	37	4.66	34	11.6	206	289	1.001	3.3	146	6.84	2.4	3.879	76	1.129	3.5	0.69	0	0	17	82	206	3.3
113343	2	60	4	2	5676.821197	5924.18749	19	42	67	20	28	4.64	102	63	62.76	24	6.99	53	9	166	288	1.066	4.5	144	10.26	2.225	3.103	66	0.858	5.3	0.924	NA	3	20	63	166	4.5
123298	1	68	3	2	4654.955113	5112.798096	19	38	88	17	27	5.36	101	66	61	36	8.44	14	11.3	156	287	1.162	4.8	142	5.13	2.275	2.405	74	1.163	5	1.127	0	0	17	66	156	4.8
124643	2	54	3	2	7644.718091	7597.109516	19	42	62	17	30	3.93	101	127	44.2	29	7.38	27	14.5	144	290	1.356	4.1	145	5.13	2.35	5.87	71	2.123	4.4	0.937	0	0	17	127	144	4.1
109709	1	52	3	2	12903.06481	12929.59352	19	41	77	15	22	6.07	102	162	89.28	28	5.22	63	14	136	283	1.195	4.2	141	5.13	2.275	3.672	69	2.405	5.7	0.973	2	2	15	162	136	4.2
109615	2	65	2	2	7743.434621	8203.069772	19	42	67	25	26	4.28	101	203	86.63	33	5.38	10	21.7	205	281	1.098	3.6	141	10.26	2.475	4.448	75	0.723	5.1	1.064	2	2	25	203	205	3.6
112464	2	69	2	2	14920.47905	15706.77517	19	41	93	19	24	6.43	99	86	82.21	29	5.16	17	22	132	281	1.292	3.8	140	8.55	2.45	5.301	70	0.937	4	0.856	1	1	19	86	132	3.8
124303	2	68	2	2	4951.580746	5217.202998	19	37	133	15	23	6.07	102	25	53.04	38	4.5	88	6.3	245	278	1.098	3.8	139	30.78	2.375	3.827	75	0.531	5.5	1.152	0	0	15	25	245	3.8
109290	2	68	2	2	3967.693106	4099.841985	19	49	74	18	26	6.43	101	94	61	27	5.27	30	18.8	159	287	1.259	3.7	143	15.39	2.475	4.163	76	1.31	4.2	0.883	2	2	18	94	159	3.7
121104	2	66	2	2	7545.916923	7950.709564	19	36	86	17	23	7.5	104	115	87.52	32	4.16	24	12	184	283	1.292	4.2	141	3.42	2.325	6.491	68	1.276	6.5	0.929	0	0	17	115	184	4.2
123639	1	65	2	2	6747.888714	7345.471067	19	40	69	25	28	8.21	102	337	98.12	34	11.05	24	22	202	294	0.969	4.5	143	8.55	2.325	3	74	0.531	8.8	1.509	2	2	25	337	202	4.5
111256	2	63	2	2	8352.383033	8763.253338	19	42	72	21	28	5.71	101	151	95.47	33	6.49	22	9.1	225	285	1.227	3.8	142	5.13	2.325	3.698	75	0.903	4.9	1.1	2	2	21	151	225	3.8
121647	2	63	2	2	4970.491528	5120.882849	19	37	76	28	27	5.71	103	253	79.56	35	5.38	19	11.6	192	281	1.098	3.8	140	8.55	2.35	3.853	72	0.587	3	1.008	0	0	28	253	192	3.8
116531	1	63	2	2	8546.49289	8732.65871	19	44	66	16	30	4.64	97	84	110.5	34	4.94	66	28.8	124	277	1.292	4.4	139	10.26	2.425	6.31	78	0.971	8.6	1.018	0	0	16	84	124	4.4
122575	1	62	2	2	3315.481178	3494.080164	19	48	66	17	25	5.36	99	193	98.12	30	8.77	19	12.9	172	282	1.195	3.6	139	6.84	2.375	6.387	78	0.881	6.7	1.118	2	2	17	193	172	3.6
109439	2	59	2	2	11972.15669	12824.37051	19	41	117	21	25	3.57	103	98	61.88	30	6.16	95	13.8	153	283	0.936	4.3	142	15.39	2.325	4.81	71	0.802	4.7	1.132	0	0	21	98	153	4.3
109643	2	80	1	2	29216.72768	43103.19961	19	35	66	22	28	8.93	103	99	93.7	25	5.11	14	7.3	253	289	1.324	4.4	143	8.55	2.25	5.043	60	1.524	7	0.961	0	0	22	99	253	4.4
115437	1	79	1	2	44113.49153	49622.06642	19	42	72	21	24	5.36	104	134	121.99	22	7.94	18	18.1	143	286	1.162	4	142	10.26	2.35	3.077	64	1.524	7.3	0.943	2	2	21	134	143	4
114420	2	77	1	2	47662.65243	52999.07788	19	41	74	27	26	3.93	101	156	68.07	21	4.77	9	15.6	172	278	1.324	3.7	140	8.55	2.325	5.922	62	1.355	4.3	1.137	0	0	27	156	172	3.7
117363	2	70	1	2	19729.44885	23315.55404	19	33	61	18	28	5.36	102	125	83.98	33	6.44	16	15	203	283	1.066	4.8	141	6.84	2.25	5.379	66	1.874	6.2	1.333	0	0	18	125	203	4.8
113479	2	60	1	2	137289.7474	145124.4733	19	41	123	28	28	6.07	100	234	74.26	25	5.44	16	14.3	165	277	1.324	4.7	138	3.42	2.325	4.603	66	0.756	4.9	0.761	1	1	28	234	165	4.7
122813	1	73	4	1	17240.3643	18224.91612	19	45	45	21	24	5.71	104	463	106.08	22	4.72	15	22	212	284	0.904	4	142	8.55	2.225	5.146	67	2.055	7.3	1.139	2	2	21	463	212	4
113546	1	73	4	1	14833.06767	16051.409	19	42	83	25	32	6.78	101	133	81.33	28	5.22	51	13.3	189	291	1.162	4.4	145	8.55	2.375	4.655	70	0.948	3.6	0.663	2	2	25	133	189	4.4
115309	1	71	4	1	9642.543454	9904.688496	19	40	79	26	27	4.64	100	325	77.79	23	5.11	15	16.3	182	277	1.195	4.1	139	11.97	2.275	3.982	63	0.824	5.8	1.012	2	2	26	325	182	4.1
114579	1	71	4	1	5587.248866	6031.356671	19	40	85	22	22	4.28	103	169	74.26	32	6.44	29	15.6	150	284	0.969	4.1	142	5.13	2.225	5.043	72	0.971	7.5	0.983	0	0	22	169	150	4.1
117598	1	70	4	1	45477.75589	46454.74598	19	40	81	17	25	7.5	107	66	89.28	30	5.94	45	15.6	131	288	0.904	4.7	143	6.84	2.7	3.698	70	2.01	5.8	1.063	2	2	17	66	131	4.7
115154	1	70	4	1	6076.824901	6363.730666	19	46	83	19	27	2.5	88	107	61.88	35	7.6	33	10.7	125	257	1.324	4.7	128	8.55	2.375	2.715	81	2.71	4.6	0.807	0	0	19	107	125	4.7
120150	1	67	4	1	9166.465927	9119.701324	19	40	104	18	27	5.71	94	170	70.72	30	13.99	28	17.9	136	280	1.001	4.3	135	5.13	2.35	5.715	70	2.156	6.1	0.847	0	0	18	170	136	4.3
119102	2	66	4	1	7037.466588	7339.435543	19	41	55	22	27	5.71	99	94	49.5	30	5.94	15	18.1	192	281	1.001	3.7	140	13.68	2.325	5.663	71	0.768	4.5	0.851	2	2	22	94	192	3.7
112171	2	66	4	1	16766.16642	17679.27894	19	39	66	21	27	5.71	104	347	51.27	32	6.44	22	17.2	247	289	1.066	4.4	144	8.55	2.375	5.431	71	0.813	4.5	0.744	0	0	21	347	247	4.4
124704	2	65	4	1	7828.771952	7982.609185	19	38	92	23	28	7.14	96	82	76.02	36	6.61	58	11.1	172	278	1.259	3.4	137	8.55	2.25	4.344	74	1.276	5.7	1.217	2	2	23	82	172	3.4
120343	2	65	4	1	3631.587349	3894.946497	19	40	99	19	25	4.64	101	137	49.5	31	6.22	27	11.3	166	278	1.162	3.9	139	6.84	2.25	4.758	71	1.389	5.2	0.829	1	1	19	137	166	3.9
120013	1	62	4	1	5006.312815	5260.294953	19	45	104	20	26	3.93	103	144	92.82	32	7.66	27	10.2	207	281	1.066	4.5	140	6.84	2.45	5.405	77	0.926	6.4	1.005	0	0	20	144	207	4.5
120843	1	61	4	1	8292.427086	8978.647879	19	42	60	17	28	3.93	102	95	50.39	30	8.44	12	20.6	130	285	1.227	4.1	142	8.55	2.25	4.913	72	1.219	5.1	1.148	2	2	17	95	130	4.1
117827	2	59	4	1	10212.6431	10055.97654	19	43	76	20	30	5.36	95	93	50.39	34	5.27	15	12	193	280	1.13	3.3	140	5.13	2.375	5.069	77	1.468	7.8	0.777	0	0	20	93	193	3.3
109921	2	58	4	1	12110.52006	12616.40113	19	41	66	21	26	4.28	100	66	71.6	26	4.61	11	22.4	166	282	1.195	3.1	142	13.68	2.2	7.448	67	1.953	6.4	0.905	2	2	21	66	166	3.1
111507	1	58	4	1	9505.223005	10476.34622	19	42	85	19	25	5	102	207	82.21	33	5.44	16	12	146	282	1.195	4.2	141	5.13	2.325	6.077	75	1.773	4.7	0.823	2	2	19	207	146	4.2
121629	2	56	4	1	22627.1659	23307.75454	19	42	99	19	27	3.57	101	173	55.69	31	6.83	27	17.9	172	282	1.162	3.8	141	10.26	2.25	5.301	73	0.982	4.7	0.658	0	0	19	173	172	3.8
124284	2	55	4	1	6565.98045	6507.601374	19	40	107	16	25	3.57	101	65	33.59	38	8.16	50	7.3	138	285	1.162	3.9	142	3.42	2.325	4.603	78	2.732	4.7	1.222	2	2	16	65	138	3.9
121368	1	55	4	1	11307.74209	12610.26073	19	45	59	19	25	8.57	102	94	86.63	31	4.83	10	21.1	137	283	1.227	4.2	140	10.26	2.25	4.81	76	1.535	6.2	0.876	2	2	19	94	137	4.2
112531	2	53	4	1	3910.94771	4397.082657	19	42	80	26	24	2.5	103	88	58.34	33	4.83	17	19.7	163	282	1.292	3.6	143	5.13	2.3	7.241	75	1.795	6.8	0.842	0	0	26	88	163	3.6
112210	1	53	4	1	5947.10338	6689.387802	19	45	64	21	24	6.43	102	169	88.4	31	5.33	15	16.5	130	285	1.292	4.5	142	20.52	2.45	3.62	76	0.937	4.7	1.433	2	2	21	169	130	4.5
114643	1	50	4	1	20754.35923	22821.80867	19	49	56	19	26	7.5	100	73	88.4	28	4.77	19	21.7	136	284	1.259	4.1	141	13.68	2.375	5.715	77	1.242	6	1.073	NA	3	19	73	136	4.1
116485	1	50	4	1	14130.12992	15422.34541	19	41	52	19	28	5	102	124	83.98	38	4.05	11	19	144	280	1.356	4.2	141	6.84	2.35	6.517	79	2.36	4.1	0.961	0	0	19	124	144	4.2
114519	1	50	4	1	7017.091652	7150.023281	19	43	69	16	26	3.57	97	130	62.76	28	8.77	31	19.7	148	278	1.13	4	138	5.13	2.325	2.586	71	1.648	4.4	0.83	2	2	16	130	148	4
112099	2	72	3	1	7915.120281	8707.192465	19	37	127	20	24	4.64	96	57	60.11	33	8.6	88	10.6	172	273	1.066	4.1	135	6.84	2.4	4.784	70	2.518	7.1	0.915	NA	3	20	57	172	4.1
118602	2	69	3	1	11017.40654	12023.04713	19	37	119	20	25	7.85	98	77	76.91	39	6.33	14	9.3	174	282	1.195	4	139	5.13	2.225	5.275	76	1.829	6.4	1.332	2	2	20	77	174	4
114499	2	65	3	1	6111.050659	6377.338409	19	39	90	18	30	5	102	65	53.04	30	4.72	16	24.9	157	287	1.195	3.9	144	6.84	2.225	5.301	69	1.919	3.1	0.714	NA	3	18	65	157	3.9
109617	1	64	3	1	9226.958794	9885.25786	19	38	111	18	25	3.21	97	143	76.91	33	5.16	34	5.9	155	276	0.904	4	139	13.68	2.375	7.189	71	1.231	4.8	0.81	NA	3	18	143	155	4
113455	1	61	3	1	6111.064842	6675.099989	19	34	78	20	20	5.71	94	115	59.23	31	5.11	21	21	168	265	0.936	3.9	132	10.26	1.975	4.577	65	1.694	6.1	1.179	NA	3	20	115	168	3.9
114637	2	59	3	1	22867.01583	22909.35647	19	34	96	15	27	6.07	98	59	40.66	37	14.6	22	13.4	168	290	0.904	4.1	140	6.84	2.225	4.913	71	1.885	3.1	1.335	0	0	15	59	168	4.1
118753	1	71	2	1	7285.090602	7279.653614	19	45	98	18	25	5.36	104	233	102.54	29	3.83	21	17.2	147	286	1.033	4	144	8.55	2.45	3.491	74	1.219	7.9	1.2	2	2	18	233	147	4
111102	1	67	2	1	5520.030024	5893.614407	19	40	70	18	30	3.93	100	158	88.4	29	5.77	16	14.7	163	287	0.969	4.4	144	10.26	2.225	4.163	69	0.813	6.6	1.099	1	1	18	158	163	4.4
117353	1	64	2	1	8889.763137	9381.244322	19	35	71	17	25	3.93	104	149	65.42	31	5	24	17.2	144	278	0.84	3.9	140	6.84	2.3	5.793	66	0.756	5.6	1.028	2	2	17	149	144	3.9
118722	2	62	2	1	7188.270171	7824.612137	19	39	65	25	29	6.43	100	337	88.4	38	4.27	20	13.1	256	289	1.324	3.8	145	8.55	2.375	3.155	77	1.039	5.4	1.077	2	2	25	337	256	3.8
118463	1	62	2	1	3125.402613	3218.747846	19	37	107	25	27	7.85	103	300	96.36	33	4.5	18	6.1	195	285	0.936	4.1	142	6.84	2.2	2.534	70	0.452	6.6	1.547	0	0	25	300	195	4.1
120594	1	61	2	1	2759.353234	2803.916302	19	39	75	14	25	5	106	107	82.21	32	7.6	36	12.2	146	289	1.13	4.4	144	8.55	2.35	5.767	71	2.552	6.7	1.409	NA	3	14	107	146	4.4
124788	1	60	2	1	3013.473594	3103.475884	19	44	45	17	18	5.36	103	167	94.59	29	5.11	22	7.9	149	282	1.098	4.3	141	8.55	2.35	2.353	73	0.756	5.5	1.279	2	2	17	167	149	4.3
124557	1	60	2	1	4996.439222	5373.429551	19	36	58	17	26	8.21	107	216	92.82	29	4.44	10	14	118	289	1.033	4.4	144	6.84	2.225	3.879	65	0.734	3.8	1.201	0	0	17	216	118	4.4
116587	1	57	2	1	9944.050036	10691.67476	19	44	90	21	24	5	101	520	114.92	31	6.88	37	11.6	176	285	1.098	4	142	6.84	2.4	5.275	75	4.11	6.7	1.039	2	2	21	520	176	4
119572	2	56	2	1	13320.24765	13702.56198	19	49	107	21	27	4.64	98	156	73.37	35	5.11	24	17.6	189	277	1.227	3.1	139	11.97	2.5	4.81	84	1.964	5.3	1.046	2	2	21	156	189	3.1
118944	1	51	2	1	15443.10459	16237.17289	19	45	76	23	30	7.5	95	225	90.17	29	4.27	21	15.8	146	277	0.743	4.6	138	6.84	2.4	5.87	74	1.05	4.4	0.91	2	2	23	225	146	4.6
115440	2	80	1	1	38233.85039	46823.2773	19	38	114	37	24	10	104	50	100.78	29	4.61	197	15.2	212	284	1.162	5.3	140	5.13	2.275	4.603	67	2.032	5.2	0.79	0	0	37	50	212	5.3
117441	1	80	1	1	12917.3974	15903.98518	19	44	83	24	24	8.93	105	304	134.37	26	5.55	48	17.6	220	289	1.098	5	143	6.84	2.425	4.939	70	1.49	6.2	1.079	2	2	24	304	220	5
120556	1	76	1	1	77873.35454	85321.21418	19	44	49	17	28	6.07	98	41	82.21	29	8.72	24	22.6	106	284	0.904	4.1	140	6.84	2.4	5.017	73	2.823	4.9	0.887	0	0	17	41	106	4.1
120345	1	72	1	1	33299.42	34707.06202	19	41	68	23	23	5.71	103	284	90.17	28	5	29	11.8	152	278	1.066	4	139	6.84	2.275	4.655	69	0.982	6.1	1.032	2	2	23	284	152	4
117994	2	69	1	1	55615.45034	56713.22991	19	42	94	13	24	7.14	105	69	80.44	24	4.55	31	7.9	132	290	1.227	3.8	145	5.13	2.325	5.637	66	1.253	4.5	0.911	2	2	13	69	132	3.8
123531	2	68	1	1	25546.9731	27703.14994	19	33	87	13	22	10.71	106	41	91.05	33	7.88	25	8.8	181	297	1.033	4.5	145	3.42	2.375	3.103	66	2.292	7.8	1.194	0	0	13	41	181	4.5
123037	1	67	1	1	94756.48705	108234.1503	19	39	40	20	27	7.5	101	131	107.85	26	5.33	19	31.9	162	284	1.098	4.3	141	10.26	2.425	6.362	65	1.558	7	0.905	2	2	20	131	162	4.3
120799	1	66	1	1	83873.47531	89243.59541	19	40	65	19	28	6.78	98	133	68.07	29	4.33	23	12.9	125	281	1.13	4.6	140	17.1	2.275	4.293	69	2.021	5.6	1.306	2	2	19	133	125	4.6
124689	1	63	1	1	14200.11338	16804.21492	19	43	94	18	26	7.5	103	191	76.02	30	6.11	32	17.4	144	287	0.936	4	142	11.97	2.325	7.474	73	2.529	6.6	1.049	0	0	18	191	144	4
115587	2	61	1	1	82601.52835	84429.06496	19	40	83	19	28	5.36	108	61	59.23	22	5	50	18.1	147	295	1.162	4	148	11.97	2.375	4.06	62	1.705	2.9	0.996	0	0	19	61	147	4
118022	2	60	1	1	40883.71448	42828.29964	19	40	79	26	24	7.14	103	73	70.72	29	4.66	20	16.8	148	283	1.388	4	141	6.84	2.4	5.715	69	1.818	5.2	1.015	2	2	26	73	148	4
120542	1	59	1	1	33831.13354	37178.46247	19	40	71	17	26	6.78	101	120	86.63	29	5.55	33	22.9	136	278	0.936	4.1	138	20.52	2.375	5.56	69	1.039	5	1.067	2	2	17	120	136	4.1
113866	2	58	1	1	77448.78733	94853.83038	19	41	81	20	18	4.28	102	51	86.63	24	5.66	14	21	137	283	1.324	4.2	142	11.97	2.3	4.629	65	1.942	3.7	0.792	2	2	20	51	137	4.2
116694	2	57	1	1	123718.234	141679.3055	19	38	98	18	26	3.93	101	66	58.34	33	5.55	20	16.3	151	281	1.259	4.5	141	10.26	2.275	5.844	71	1.468	5.7	1.067	2	2	18	66	151	4.5
117780	1	55	1	1	167398.9293	177297.1195	19	38	73	17	27	7.85	102	84	50.39	28	18.21	14	13.6	132	299	1.13	5.2	142	5.13	2.425	3.491	66	2.574	4.3	1.148	2	2	17	84	132	5.2
109841	2	54	1	1	31885.70403	30742.2106	19	31	58	20	23	4.28	101	176	81.33	34	9.77	17	9.9	172	285	1.195	3.6	141	6.84	2.25	3.905	65	1.66	5.4	1.255	0	0	20	176	172	3.6
124323	2	54	1	1	65639.41407	69993.41167	19	42	88	19	27	3.93	103	73	61.88	31	5.22	40	13.8	121	284	1.356	4.3	143	6.84	2.4	4.862	73	0.937	4.5	0.864	2	2	19	73	121	4.3
111500	2	53	1	1	18395.45655	17695.88683	19	37	114	16	26	6.43	101	85	59.23	37	5.05	14	20.8	167	283	1.13	4	141	5.13	2.45	5.819	74	1.987	6.2	0.894	0	0	16	85	167	4
112850	1	53	1	1	15128.74583	16023.29876	19	40	89	18	26	10	103	66	101.66	28	4.83	54	13.6	120	286	1.001	4.4	141	6.84	2.275	5.301	68	1.614	5.7	1.007	1	1	18	66	120	4.4
124144	2	52	1	1	119480.0911	128898.3504	19	39	105	19	28	4.64	103	43	42.43	29	12.1	31	15.4	167	292	0.872	3.5	143	10.26	2.225	4.163	68	0.847	3.3	1.283	2	2	19	43	167	3.5
121147	2	50	4	2	4787.032994	5371.189463	18	44	48	16	26	3.93	100	60	63.65	29	5.22	14	21.9	128	277	1.13	3.9	139	6.84	2.225	4.81	73	0.734	3.8	1.043	2	2	16	60	128	3.9
119220	2	80	4	2	10406.1195	11694.21809	18	38	80	16	25	6.78	98	56	71.6	29	10.49	15	6.6	176	281	1.033	4.1	137	3.42	2.375	4.939	67	1.976	4.7	0.903	2	2	16	56	176	4.1
115202	2	80	4	2	14794.47146	16660.56186	18	39	68	22	25	5	100	137	62.76	28	5.55	21	16.8	174	280	1.098	3.8	140	6.84	2.35	6.051	67	2.292	5.4	0.864	0	0	22	137	174	3.8
119155	2	70	4	2	8674.681011	8966.163457	18	38	147	18	27	11.07	87	79	95.47	36	19.6	264	9	137	287	1.259	4.4	133	11.97	2.375	4.37	74	3.184	7	0.924	0	0	18	79	137	4.4
123193	2	63	4	2	10675.45942	10839.11653	18	44	117	19	29	4.64	97	74	45.97	29	10.94	13	15.6	149	279	1.066	4.2	137	5.13	2.375	5.896	73	3.308	3.4	1.013	0	0	19	74	149	4.2
120282	2	61	4	2	4531.549881	4727.338618	18	38	89	18	27	2.86	103	89	54.81	37	5.33	21	15	144	281	1.227	4.2	142	10.26	2.3	4.526	75	1.727	4	0.781	0	0	18	89	144	4.2
124085	1	60	4	2	3028.109814	3236.138647	18	41	73	17	25	5.71	103	186	104.31	33	5.44	24	13.6	152	282	1.13	3.9	141	6.84	2.375	5.508	74	1.626	5.2	1.054	1	1	17	186	152	3.9
115173	1	80	3	2	8803.68896	9634.843677	18	37	140	23	21	9.28	107	106	91.94	31	7.6	13	19.7	202	292	0.84	4.3	143	8.55	2.175	3.543	68	0.497	5.6	0.812	2	2	23	106	202	4.3
120959	1	69	3	2	6092.477387	6691.709379	18	37	71	14	24	6.43	110	234	74.26	29	5.55	33	15.4	184	294	1.066	4.6	147	6.84	2.15	6.103	66	0.531	5.9	1.006	0	0	14	234	184	4.6
110820	1	63	3	2	5899.184396	6384.967481	18	42	132	13	28	4.64	99	49	65.42	30	8.27	26	10.9	136	282	0.936	4.6	140	5.13	2.3	2.896	72	1.084	4.6	0.955	0	0	13	49	136	4.6
113207	1	54	3	2	13341.59659	13631.29465	18	38	106	16	26	6.07	99	100	78.68	25	5	23	10.6	140	279	1.421	4.4	139	5.13	2.175	5.612	63	1.931	4.8	0.987	0	0	16	100	140	4.4
114203	1	61	2	2	10381.26776	10889.99347	18	41	105	20	28	4.64	98	63	69.84	37	5.16	70	14.7	96	279	0.936	4.2	140	11.97	2.45	5.508	78	1.163	4.7	1.099	0	0	20	63	96	4.2
123674	1	59	2	2	5589.777351	5632.32737	18	45	76	21	25	5	100	421	86.63	42	5.05	18	10.2	197	279	1.421	3.9	140	6.84	2.65	3.051	87	1.129	10.2	1.306	0	0	21	421	197	3.9
115809	1	70	2	2	9806.235184	10447.50767	18	35	77	33	27	3.21	102	469	99.01	31	4.61	25	13.6	177	277	1.162	4.4	140	10.26	2.25	4.913	66	0.587	5.6	1.184	0	0	33	469	177	4.4
123059	2	68	2	2	4126.276056	4264.482124	18	33	149	19	26	4.28	105	42	80.44	32	6.44	177	11.5	135	286	1.227	3.7	143	6.84	2.15	3.905	65	0.847	4.7	0.841	NA	3	19	42	135	3.7
120593	1	68	2	2	6005.582563	6469.609829	18	42	88	30	26	4.64	102	86	109.62	36	4.66	33	20.6	165	279	1.259	4.3	140	8.55	2.375	5.637	78	1.784	6.9	0.992	2	2	30	86	165	4.3
124472	2	58	2	2	7022.227353	8033.253492	18	39	58	25	24	6.07	100	78	59.23	41	5.94	90	21.9	131	278	1.292	4.1	138	3.42	2.225	8.172	80	1.603	7	0.927	0	0	25	78	131	4.1
115909	2	55	2	2	3491.036572	3540.744236	18	44	93	14	28	3.21	97	94	73.37	27	5	501	15.4	153	276	0.936	3.8	139	5.13	2.475	5.456	71	1.603	6.4	1.15	NA	3	14	94	153	3.8
119503	1	50	2	2	4269.421981	4502.571937	18	39	67	22	25	4.64	103	386	83.98	27	5.44	21	16.1	148	279	1.195	3.7	140	5.13	2.25	4.5	66	1.253	5	1.232	0	0	22	386	148	3.7
114163	2	64	1	2	48269.13059	52187.21511	18	38	214	26	24	5.36	103	38	51.27	29	4.55	112	7	119	279	1.098	3.9	140	5.13	2.45	4.965	67	0.971	3.9	1.004	2	2	26	38	119	3.9
110495	2	54	1	2	85939.81341	93758.10759	18	45	66	19	27	5.71	100	70	71.6	27	4.66	20	10.7	215	284	1.227	4.2	142	6.84	2.35	4.991	72	1.332	5.4	1.241	2	2	19	70	215	4.2
123945	1	50	1	2	116545.7543	129089.0388	18	43	75	21	30	4.64	103	80	95.47	26	5.33	11	13.1	171	285	1.033	4.3	143	8.55	2.25	4.732	69	1.152	4.3	0.802	2	2	21	80	171	4.3
114828	2	80	1	2	14093.26679	18408.00381	18	43	54	24	25	5.71	103	144	57.46	33	6.88	16	16.8	158	286	1.001	4	142	5.13	2.375	3.776	76	2.089	4	0.855	0	0	24	144	158	4
110821	2	79	1	2	31290.62759	32169.00286	18	34	110	31	25	8.93	100	70	94.59	46	5.11	147	20.6	779	282	1.162	4.2	139	11.97	2.275	4.293	80	1.242	4.6	1.194	0	0	31	70	779	4.2
122214	2	76	1	2	37108.35844	44862.84432	18	39	79	19	23	8.93	103	110	56.58	26	5.11	15	16.1	156	287	1.227	4	142	6.84	2.275	5.689	65	1.355	2.1	1.113	2	2	19	110	156	4
114019	1	74	1	2	8296.380507	8936.110765	18	47	55	25	27	6.78	99	96	94.59	29	5.5	24	17.4	144	285	1.259	4.7	142	5.13	2.425	6.982	76	3.161	6.7	1.011	0	0	25	96	144	4.7
122567	1	71	1	2	4772.54016	4756.076515	18	43	73	20	27	3.93	99	40	104.31	30	5.38	37	17	132	277	1.13	3.9	139	8.55	2.425	4.319	73	1.005	5.8	0.832	0	0	20	40	132	3.9
114323	2	70	1	2	41887.54857	48917.60414	18	40	61	18	24	3.57	103	42	53.04	26	4.72	9	13.6	149	281	0.872	3.7	142	5.13	2.225	5.819	66	1.479	4.9	0.905	2	2	18	42	149	3.7
119923	2	69	1	2	69576.12905	68646.77528	18	38	87	17	22	10.35	103	55	92.82	31	6.72	17	10.9	115	285	1.195	4.4	139	6.84	2.35	4.241	69	1.852	5.8	0.968	1	1	17	55	115	4.4
114500	1	67	1	2	105572.5082	113147.9734	18	43	109	18	25	7.85	101	99	99.89	21	5.05	26	14	123	280	1.195	4.1	139	5.13	2.35	4.862	64	1.073	5.7	0.918	2	2	18	99	123	4.1
114586	2	64	1	2	63272.63745	68191.6827	18	39	99	21	23	5.36	104	101	59.23	26	5.5	12	11.1	160	282	0.904	4.1	141	10.26	2.5	4.163	65	1.039	5.3	0.85	2	2	21	101	160	4.1
118248	1	61	1	2	11388.92813	11903.16655	18	37	81	20	27	4.28	101	63	73.37	30	5.16	151	19.7	124	281	1.292	4.3	141	5.13	2.25	5.896	67	1.084	5.8	1.101	NA	3	20	63	124	4.3
116243	2	60	1	2	32835.82241	32641.29247	18	39	75	13	25	6.43	102	63	48.62	29	4.05	37	15.2	133	280	1.388	3.8	140	1.71	2.375	5.431	68	3.443	4	0.946	0	0	13	63	133	3.8
112543	1	55	1	2	12015.91404	12821.1026	18	47	104	17	26	6.07	102	74	97.24	22	6.94	33	18.8	116	284	1.066	4	141	8.55	2.35	4.939	69	1.219	6.7	1.108	0	0	17	74	116	4
109917	2	54	1	2	81968.52403	89347.86127	18	41	44	22	28	6.07	104	117	54.81	29	5	12	16.5	129	282	1.259	4.2	141	8.55	2.3	6.31	70	0.497	4.2	0.844	2	2	22	117	129	4.2
118571	2	77	4	1	15293.62285	16624.49414	18	46	76	21	25	6.07	100	81	61.88	35	5.16	26	15.4	183	281	1.259	3.9	140	6.84	2.55	6.206	81	6.018	5.1	0.849	1	1	21	81	183	3.9
118515	1	76	4	1	8141.63928	8778.571291	18	43	56	13	28	6.07	97	68	95.47	36	9.99	16	16.1	123	284	1.001	4.2	139	6.84	2.375	4.422	79	0.553	4.5	1.722	0	0	13	68	123	4.2
121205	1	70	4	1	12053.24053	12927.16632	18	42	113	20	31	5	100	152	90.17	32	9.16	32	15.2	NA	282	0.969	4.5	139	5.13	2.575	4.732	74	3.884	7	0.633	0	0	20	152	164	4.5
119632	2	68	4	1	10675.45942	10839.11653	18	41	105	20	30	2.86	94	174	47.74	32	9.21	20	15	135	281	1.13	3.3	140	11.97	2.375	3.801	73	2.45	5.8	1.02	0	0	20	174	135	3.3
117077	1	65	4	1	5283.835777	5361.402805	18	41	43	14	26	5	99	81	79.56	29	7.49	15	19.7	137	278	1.066	4.5	138	10.26	2.375	3.957	70	1.897	6.5	1.061	2	2	14	81	137	4.5
112828	1	64	4	1	3365.99404	3539.845776	18	43	74	20	25	7.85	103	123	101.66	32	5.5	24	9.7	152	288	1.227	4	143	3.42	2.225	4.655	75	1.558	6.7	0.833	2	2	20	123	152	4
120584	2	63	4	1	16587.11461	17444.17632	18	44	53	23	26	3.57	99	219	40.66	25	12.49	38	15.8	157	285	1.388	4.1	140	8.55	2.35	2.095	69	1.524	4	1.044	2	2	23	219	157	4.1
111516	1	61	4	1	7551.215416	8089.093085	18	39	87	15	27	7.85	101	63	86.63	27	6.72	31	10.2	130	291	0.84	4.3	144	5.13	2.275	5.172	66	1.287	5.7	1.022	2	2	15	63	130	4.3
111338	1	60	4	1	8211.434889	8692.458947	18	43	76	18	29	5.36	102	184	86.63	29	5.33	25	9	184	280	0.84	4.1	140	10.26	2.275	6.827	72	2.213	6.8	1.075	0	0	18	184	184	4.1
122414	2	56	4	1	7927.594362	8535.082682	18	41	117	18	27	3.93	104	82	48.62	31	5.11	35	19.2	175	284	1.227	4.2	143	6.84	2.225	5.637	72	1.287	4.9	0.925	2	2	18	82	175	4.2
115479	2	55	4	1	12225.5799	12593.4396	18	44	77	21	26	4.28	99	120	61.88	32	4.61	33	12.7	187	278	1.162	3.8	140	10.26	2.225	5.482	76	0.689	3.5	0.969	2	2	21	120	187	3.8
114487	1	55	4	1	12062.44197	12207.74989	18	43	68	17	26	4.64	102	115	58.34	30	5.05	26	26.1	156	285	1.001	4.1	143	10.26	2.25	5.198	73	5.137	7.5	1.026	2	2	17	115	156	4.1
119061	1	54	4	1	20049.23273	21798.05248	18	42	49	17	27	4.28	99	72	68.95	40	5.55	27	15.4	115	279	1.356	3.9	140	17.1	2.425	5.198	82	2.552	4.5	0.98	0	0	17	72	115	3.9
112700	2	51	4	1	9593.895967	10309.50164	18	41	64	18	26	3.93	100	67	49.5	34	5.16	13	17.9	138	278	1.13	3.7	140	6.84	2.275	5.094	75	1.027	4.4	1.074	2	2	18	67	138	3.7
118407	2	51	4	1	23195.09522	25099.40805	18	39	60	22	26	6.07	100	144	53.92	39	5.05	23	9	209	281	1.195	4.1	140	3.42	2.375	5.56	78	1.197	3.1	1.01	NA	3	22	144	209	4.1
123624	1	72	3	1	9164.555569	9929.976463	18	44	65	19	26	4.64	100	52	92.82	31	6.38	29	15.4	123	284	1.001	4.8	142	6.84	2.35	4.267	75	2.574	7.5	1.156	0	0	19	52	123	4.8
110350	2	67	3	1	5921.890584	6053.655254	18	37	66	17	25	3.21	103	62	47.74	36	6.22	13	12.9	130	284	1.033	3.5	143	8.55	2.275	5.353	73	1.118	3.3	0.999	1	1	17	62	130	3.5
109607	1	63	3	1	7022.193287	7670.323183	18	42	102	16	25	6.43	105	84	83.1	29	5.27	17	25.4	167	290	0.904	5.2	145	8.55	2.375	7.008	71	1.705	6.3	1.08	0	0	16	84	167	5.2
116667	1	62	3	1	3909.726633	4192.426173	18	35	89	16	25	8.21	95	49	42.43	31	34.75	66	15	149	301	1.388	4.6	134	3.42	2.275	5.87	66	2.495	2.4	0.956	0	0	16	49	149	4.6
116961	1	60	3	1	13683.18706	14716.38088	18	37	85	21	26	7.5	104	48	76.02	27	4.55	16	21.1	175	281	1.388	4.5	140	3.42	2.25	4.112	64	2.574	5.8	1.185	1	1	21	48	175	4.5
121038	1	53	3	1	23858.88825	25548.28632	18	40	82	14	23	6.43	101	76	75.14	26	5.05	88	12.7	131	275	1.453	3.9	137	3.42	2.3	5.379	66	1.614	3.6	0.962	2	2	14	76	131	3.9
112410	2	73	2	1	7909.194377	8523.39946	18	42	78	31	27	6.43	105	126	94.59	31	5	17	12.7	195	288	1.066	4	144	8.55	2.325	6.956	73	0.531	8	1.154	2	2	31	126	195	4
119675	1	71	2	1	11462.47394	11885.21718	18	37	46	22	29	5.36	100	544	75.14	29	5.05	12	11.8	173	280	1.292	4.1	140	5.13	2.175	3.698	66	0.542	4.7	1.343	2	2	22	544	173	4.1
111257	1	70	2	1	7119.959671	7507.23027	18	40	59	24	23	5.71	105	440	99.01	35	5.55	13	16.5	169	284	0.872	3.4	142	8.55	2.35	3.724	75	0.655	6.7	1.012	1	1	24	440	169	3.4
114039	1	62	2	1	8495.930149	8827.734333	18	42	76	21	25	4.28	101	408	107.85	31	5.5	18	17	158	281	0.936	3.9	141	5.13	2.375	5.094	73	1.332	6.3	1.571	0	0	21	408	158	3.9
123992	1	62	2	1	4936.419634	5313.646158	18	41	206	25	25	5	101	99	56.58	33	5.38	92	29	141	274	0.969	3.4	137	17.1	2.5	4.758	74	1.569	5.6	0.9	2	2	25	99	141	3.4
124796	2	61	2	1	4516.585648	4667.864801	18	37	101	15	33	8.57	102	165	69.84	34	6.83	43	8.8	204	294	1.098	3.8	145	3.42	2.3	4.112	71	1.931	7.5	0.961	NA	3	15	165	204	3.8
118980	2	59	2	1	23587.90348	26337.36738	18	42	99	17	29	3.93	100	251	82.21	31	5.05	26	11.5	150	275	1.033	3.8	138	5.13	2.45	6.775	73	1.727	4.6	0.921	1	1	17	251	150	3.8
124531	1	57	2	1	8776.632816	9205.641578	18	40	120	25	24	7.14	101	463	114.92	33	5.27	97	9.9	222	276	1.195	4.3	137	8.55	2.4	4.784	73	0.824	6.8	1.466	NA	3	25	463	222	4.3
115133	2	55	2	1	25239.57329	26445.89013	18	39	72	18	28	3.93	103	165	55.69	33	4.72	16	15.6	153	280	1.13	3.7	141	5.13	2.3	5.508	72	1.242	5.1	1.12	2	2	18	165	153	3.7
118381	2	55	2	1	6860.130771	7439.525382	18	39	95	18	24	3.93	103	99	51.27	34	5.05	14	16.3	164	278	1.13	3.9	140	10.26	2.3	4.707	73	1.061	3.8	0.895	2	2	18	99	164	3.9
117295	2	52	2	1	24359.1197	25165.06111	18	38	66	19	29	6.43	103	137	82.21	29	7.44	44	9.9	148	289	1.324	3.5	143	5.13	2.425	6.568	67	1.773	6.5	1.406	0	0	19	137	148	3.5
109408	1	51	2	1	12561.02609	12837.96414	18	35	98	19	29	8.93	100	575	223.65	35	5.05	56	10	143	287	0.807	3.1	142	6.84	2.275	4.732	70	2.484	12.1	1.11	0	0	19	575	143	3.1
112930	1	80	1	1	19332.22737	22730.42892	18	41	89	19	25	9.64	102	56	92.82	30	5.22	55	23.6	172	286	0.936	3.9	141	22.23	2.325	4.034	71	0.869	4.9	1.313	2	2	19	56	172	3.9
122629	1	73	1	1	56298.8495	60701.45229	18	39	91	14	26	7.85	103	72	125.53	33	6.77	50	12.2	133	290	1.001	4.7	143	8.55	2.35	5.896	72	1.976	8.6	1.321	2	2	14	72	133	4.7
116018	1	73	1	1	8827.036766	9586.499962	18	34	100	19	27	4.28	101	62	76.02	38	5.38	18	10.4	133	281	0.936	4.4	141	6.84	2.175	3.698	72	1.976	4.5	1.182	NA	3	19	62	133	4.4
114700	1	70	1	1	61740.31885	64098.96156	18	47	62	16	23	5	104	64	57.46	27	6.49	22	27.9	132	286	1.098	4.2	143	8.55	2.375	2.508	74	1.219	3.3	1.114	2	2	16	64	132	4.2
112680	1	67	1	1	116306.2482	131180.1605	18	42	125	14	25	6.78	101	65	98.12	27	5.16	32	13.6	167	285	1.195	4.5	142	10.26	2.4	6	69	2.495	4.4	0.989	2	2	14	65	167	4.5
115066	1	64	1	1	14434.37366	16912.82156	18	42	73	19	24	3.57	101	211	82.21	32	4.44	17	14	154	274	1.292	3.9	138	8.55	2.325	4.784	74	1.863	5.3	1.017	1	1	19	211	154	3.9
110875	1	63	1	1	103661.6936	105366.5274	18	39	81	16	27	6.78	105	119	80.44	30	6.27	28	18.8	139	286	0.872	4.4	142	8.55	2.225	4.551	69	1.095	5.6	0.944	2	2	16	119	139	4.4
119948	1	62	1	1	85198.80804	90876.43547	18	39	99	23	27	6.07	101	104	106.08	33	5.05	18	12.7	165	282	1.13	5.2	141	8.55	2.4	5.612	72	1.355	6.5	0.966	2	2	23	104	165	5.2
122636	2	61	1	1	22394.04	22692.65182	18	44	80	20	21	7.85	103	46	61.88	29	5.22	33	10.7	147	286	1.292	4.2	142	5.13	2.375	6.517	73	0.824	4.1	0.724	2	2	20	46	147	4.2
112011	1	60	1	1	56049.06766	63278.96147	18	47	53	18	29	5	100	152	76.91	25	4.83	17	18.1	190	279	0.936	3.7	140	15.39	2.375	4.655	72	1.027	5.3	1.028	NA	3	18	152	190	3.7
118031	2	59	1	1	81763.33999	80412.07119	18	36	101	22	29	2.14	98	300	56.58	30	5.72	36	7.2	205	277	1.001	3.7	140	5.13	2.275	4.422	66	0.813	4.1	0.684	2	2	22	300	205	3.7
118863	2	58	1	1	45277.18681	49867.33802	18	43	112	24	27	6.43	103	118	82.21	28	5.33	129	18.6	155	285	1.098	4.6	142	6.84	2.4	5.275	71	0.813	5.7	1.123	2	2	24	118	155	4.6
120610	1	57	1	1	10017.51858	10959.66514	18	46	80	18	28	6.78	101	168	95.47	28	4.83	19	22.6	128	287	1.13	4.1	143	5.13	2.35	3.62	74	1.592	7	1.334	2	2	18	168	128	4.1
115490	1	56	1	1	13373.55233	13701.78025	18	42	72	21	28	5	101	88	83.1	28	5.66	17	11.8	154	282	1.227	4.6	141	5.13	2.375	4.241	70	1.919	5.5	1.198	0	0	21	88	154	4.6
115056	1	56	1	1	56457.9706	61361.37403	18	43	65	16	25	6.43	103	75	86.63	28	4.61	13	14.5	151	284	1.098	3.9	142	5.13	2.2	5.715	71	1.377	5.7	1.091	2	2	16	75	151	3.9
110449	2	53	1	1	59958.6936	59013.30196	18	39	79	13	29	7.85	104	53	52.16	30	6.49	18	19.2	161	293	1.162	4.6	145	6.84	2.475	5.715	69	1.547	2.7	1.125	2	2	13	53	161	4.6
124419	1	55	4	2	23394.67536	23945.58247	17	40	100	36	26	5.71	100	208	63.65	36	8.38	34	20.1	180	284	1.227	4.3	140	13.68	2.325	4.112	76	1.174	7.9	1.058	NA	3	36	208	180	4.3
116073	1	53	4	2	30123.2457	31941.9345	17	40	108	16	26	5.71	99	302	114.04	31	7.94	63	10.7	156	277	0.872	3.8	137	3.42	2.35	6.206	71	2.574	4.5	1.318	2	2	16	302	156	3.8
110979	1	51	4	2	18050.13137	20487.65027	17	47	131	18	25	4.64	99	319	67.18	36	5.05	24	27.6	192	277	1.13	3.6	139	15.39	2.4	6.31	83	2.642	7.3	1.147	2	2	18	319	192	3.6
119651	2	80	4	2	20299.90253	20677.59361	17	40	56	25	28	7.5	101	122	56.58	31	5.11	15	14.1	221	282	1.421	3.8	140	6.84	2.25	5.301	71	0.723	5	0.789	0	0	25	122	221	3.8
120699	2	71	4	2	20218.45846	21766.42836	17	40	71	16	26	3.93	102	83	56.58	30	5.33	26	14.7	149	282	1.033	4.1	142	17.1	2.2	6.258	70	2.281	4.8	0.968	0	0	16	83	149	4.1
118266	1	68	4	2	18041.23109	19433.85439	17	40	95	17	27	6.78	105	52	64.53	28	5.38	22	8.4	136	287	1.195	4.4	143	15.39	2.275	4.758	68	1.761	5.9	0.955	0	0	17	52	136	4.4
121299	2	64	4	2	9918.727262	10297.58516	17	38	83	18	25	3.93	102	78	56.58	29	5.5	14	9.9	160	277	1.098	3.7	139	3.42	2.25	6.775	67	1.106	4.1	0.906	2	2	18	78	160	3.7
122655	2	56	4	2	30388.63216	31641.16312	17	41	91	12	27	4.64	101	36	76.91	30	7.6	27	13.4	143	284	1.162	4.4	141	10.26	2.3	4.655	71	1.377	5.8	0.9	0	0	12	36	143	4.4
118989	2	53	4	2	15209.48639	16537.04298	17	43	63	20	29	5	98	128	59.23	30	5.16	18	12.2	144	276	1.55	3.6	138	8.55	2.325	6.103	73	1.027	3.8	0.924	2	2	20	128	144	3.6
110172	2	53	4	2	23238.10871	24870.19248	17	39	84	15	22	4.64	103	85	45.08	30	4.77	51	15.8	126	279	1.162	4.3	140	1.71	2.325	4.732	69	4.132	4.8	0.778	0	0	15	85	126	4.3
116292	1	50	4	2	8121.394076	8670.524703	17	39	75	14	25	4.64	105	130	78.68	26	4.83	15	17.7	131	283	0.969	4.2	142	6.84	2.225	3.491	65	0.531	4.3	1.167	1	1	14	130	131	4.2
121927	2	71	3	2	8594.047528	9609.079701	17	41	105	20	24	6.78	101	124	103.43	39	5.72	33	12	174	284	1.13	4.1	141	10.26	2.35	5.637	80	2.484	8.6	1.133	2	2	20	124	174	4.1
122475	2	62	3	2	4293.156524	4555.961777	17	44	88	15	25	3.57	104	82	49.5	26	6.16	18	15.6	160	288	1.033	4.3	145	11.97	2.375	4.577	70	1.671	4.8	1.143	0	0	15	82	160	4.3
124477	1	59	3	2	13944.17774	14901.70786	17	46	95	21	29	4.64	99	50	102.54	32	4.94	33	14.7	70	283	1.421	4.4	142	6.84	2.45	4.888	78	1.535	3.9	0.768	0	0	21	50	70	4.4
117893	2	55	3	2	21251.25617	21686.05953	17	43	81	15	24	6.78	101	132	73.37	26	4.88	40	18.3	192	279	1.324	4.3	139	3.42	2.325	6.129	69	2.258	4.4	1.055	2	2	15	132	192	4.3
119559	1	54	3	2	37706.19068	36819.93349	17	42	82	30	24	3.57	103	539	86.63	28	5.27	18	20.1	166	280	1.259	4.1	141	15.39	2.425	7.086	70	1.061	6	1.099	2	2	30	539	166	4.1
115005	1	52	3	2	11399.393	11894.34188	17	43	93	18	26	8.21	102	121	108.73	28	5.16	18	19	139	285	0.807	4.4	141	10.26	2.25	6.232	71	1.118	7.2	0.972	1	1	18	121	139	4.4
109527	2	69	2	2	4577.190017	4734.163015	17	39	79	20	24	3.57	102	390	55.69	32	4.61	11	7.3	254	279	1.388	3.7	141	3.42	2.275	4.758	71	0.655	2.8	0.733	2	2	20	390	254	3.7
113407	2	61	2	2	9553.343789	10056.79661	17	39	155	18	26	7.14	105	81	84.86	40	4.88	48	12	180	291	1.001	3.6	145	5.13	2.375	3.75	79	0.824	5.9	0.998	NA	3	18	81	180	3.6
115013	1	57	2	2	4715.733441	5010.161596	17	43	61	23	27	5.36	103	376	105.2	32	4.66	31	17.2	177	281	1.098	4.3	141	10.26	2.325	4.474	75	0.587	7.2	1.105	0	0	23	376	177	4.3
114098	2	54	2	2	10804.0767	11778.03637	17	39	92	21	26	4.28	102	134	67.18	30	4.05	15	12.7	194	281	1.356	3.8	142	5.13	2.325	5.198	69	0.655	3.9	0.895	0	0	21	134	194	3.8
111656	2	78	2	2	15358.14365	17076.97714	17	43	79	23	28	4.64	99	225	73.37	32	10.6	14	18.6	179	294	1.259	4.1	145	8.55	2.4	4.707	75	1.231	4.3	0.886	0	0	23	225	179	4.1
124618	1	69	2	2	5482.542554	5853.589861	17	39	74	24	25	4.64	101	142	80.44	29	4.83	30	26	156	283	1.033	4.1	142	15.39	2.3	4.862	68	1.05	4.9	0.722	NA	3	24	142	156	4.1
123960	2	64	2	2	3899.807818	4256.916661	17	37	111	15	29	7.5	97	126	93.7	32	9.27	24	15.2	123	279	1.259	4.3	136	8.55	2.3	5.25	69	3.376	5.4	1.048	2	2	15	126	123	4.3
114349	2	63	2	2	11310.32467	11866.70199	17	39	114	24	24	3.57	102	135	66.3	38	5.11	23	9.3	176	276	1.259	3.8	139	6.84	2.35	6.232	77	1.152	4.3	0.83	0	0	24	135	176	3.8
120259	2	61	2	2	2846.631736	2972.922953	17	38	79	23	24	1.79	101	161	50.39	35	5.38	38	13.4	139	273	1.066	3.9	138	3.42	2.3	4.267	73	1.118	5.2	1.134	0	0	23	161	139	3.9
120361	2	61	2	2	10160.16285	10612.15678	17	39	85	23	29	4.64	96	182	83.98	29	4.94	27	14.7	176	272	1.13	3.7	136	5.13	2.375	6.827	68	1.005	4.3	0.814	0	0	23	182	176	3.7
115864	1	56	2	2	7061.915073	7538.964092	17	46	97	21	23	4.28	102	391	124.64	25	5.72	18	11.8	213	279	0.807	4.2	140	3.42	2.35	6.129	71	1.163	5.7	1.044	0	0	21	391	213	4.2
112840	2	54	2	2	13841.62232	14884.52546	17	40	83	30	28	2.14	100	88	57.46	23	3.94	13	15.6	562	279	1.066	3.9	142	17.1	2.275	3.388	63	0.632	4.6	1.016	NA	3	30	88	562	3.9
120426	2	52	2	2	7926.595171	8652.259632	17	37	87	14	28	4.28	98	178	68.95	34	6.05	24	8.1	181	276	0.872	3.9	138	5.13	2.275	4.784	71	1.287	6	1.224	NA	3	14	178	181	3.9
114413	2	59	1	2	26425.06567	29580.12201	17	43	66	27	17	9.28	98	63	122.88	31	5.22	25	11.5	167	276	1.356	4.3	136	6.84	2.4	6.025	74	1.976	7.8	0.85	0	0	27	63	167	4.3
118162	1	59	1	2	34553.34277	36235.48747	17	42	134	22	28	4.64	99	113	85.75	30	5.55	19	24.9	164	281	1.227	4.6	141	15.39	2.275	5.25	72	1.818	4.8	0.845	0	0	22	113	164	4.6
116989	1	52	1	2	22219.99675	23453.38394	17	41	61	13	25	7.14	97	66	87.52	34	5.88	15	20.8	147	275	1.162	4.4	136	8.55	2.45	4.784	75	1.264	5.4	1.083	0	0	13	66	147	4.4
113619	2	80	1	2	32735.86435	35443.45059	17	40	55	19	25	6.78	102	43	76.91	29	4.94	20	17.9	180	285	1.001	4.2	142	10.26	2.6	5.146	69	1.084	3.5	1.093	0	0	19	43	180	4.2
120353	2	80	1	2	13973.71715	14731.41926	17	40	111	27	23	4.28	96	121	78.68	29	4.77	13	18.1	207	265	1.098	4.1	133	5.13	2.25	4.551	69	0.474	4	0.454	0	0	27	121	207	4.1
123088	2	77	1	2	56346.37216	66266.85471	17	40	89	20	27	6.43	103	45	43.32	27	4.88	18	11.5	166	283	1.066	3.9	141	8.55	2.225	4.319	67	0.723	3.6	0.752	NA	3	20	45	166	3.9
110194	2	74	1	2	38956.55942	43051.70466	17	42	66	20	25	6.43	105	35	59.23	28	4.66	15	17.2	128	288	1.195	4.3	144	5.13	2.45	5.767	70	2.066	4.9	0.964	0	0	20	35	128	4.3
117458	2	73	1	2	24921.62124	26628.30059	17	41	60	21	21	5.36	107	110	70.72	29	6	15	21.1	172	286	1.001	4.2	143	8.55	2.275	3.698	70	0.7	6	0.914	0	0	21	110	172	4.2
113787	1	71	1	2	40672.29721	43194.318	17	39	72	19	22	6.43	87	95	87.52	29	5.44	36	12.7	NA	246	1.292	5.5	121	6.84	2.175	3.051	68	1.355	5	1.004	1	1	19	95	164	5.5
121981	2	68	1	2	26769.73213	34635.60724	17	43	103	19	28	8.93	101	90	92.82	28	5.05	16	9.5	177	289	1.001	4	143	8.55	2.375	5.56	71	1.614	4	0.901	0	0	19	90	177	4
117090	2	68	1	2	110833.759	117040.7089	17	40	83	18	25	5.71	102	67	60.11	31	5.27	18	23.5	143	280	1.259	4.1	140	11.97	2.275	6.413	71	1.298	4.1	0.792	2	2	18	67	143	4.1
118845	1	64	1	2	24031.59883	27984.97885	17	43	83	17	25	4.64	101	122	76.02	26	4.72	49	22.9	162	281	1.001	3.7	141	13.68	2.375	3	69	1.694	5.7	1.088	2	2	17	122	162	3.7
116203	2	61	1	2	46198.37633	45798.06353	17	38	132	21	26	6.43	107	167	64.53	34	5.05	14	9.9	211	290	1.292	4.1	145	5.13	2.275	4.81	72	1.039	5.4	1.16	0	0	21	167	211	4.1
114962	1	61	1	2	16029.24854	18651.90611	17	40	62	15	23	6.07	102	236	83.98	28	10.32	17	16.1	251	278	0.872	4.5	136	6.84	2.275	3.026	68	1.152	5.2	1.061	0	0	15	236	251	4.5
110065	1	60	1	2	18336.10918	17585.77345	17	47	57	24	26	6.43	102	360	98.12	24	4.77	13	12.9	198	284	1.033	4.1	142	15.39	2.55	4.888	71	0.926	6.9	0.942	2	2	24	360	198	4.1
117829	2	59	1	2	16417.93605	17094.63559	17	35	94	18	23	2.5	104	32	56.58	36	6.44	14	15	148	280	1.227	4.2	141	5.13	2.3	6.853	71	1.174	4.1	0.939	2	2	18	32	148	4.2
115662	1	74	4	1	13916.08133	14975.61859	17	43	56	20	32	6.43	100	121	78.68	28	6.44	14	25.6	150	282	1.259	4	140	11.97	2.4	4.474	71	0.914	6	1.172	2	2	20	121	150	4
124519	2	72	4	1	10411.86256	11483.79454	17	39	95	18	23	10.71	103	202	63.65	27	5.83	27	7.5	187	286	1.259	4.9	140	1.71	2.325	3.827	66	1.942	6.8	0.84	2	2	18	202	187	4.9
117044	1	70	4	1	21176.04693	22563.26432	17	43	86	16	28	8.21	101	151	76.02	26	9.88	16	17	161	284	1.13	4.3	138	11.97	2.225	3.595	69	0.632	3.3	0.807	1	1	16	151	161	4.3
123767	2	68	4	1	12694.60183	13385.97036	17	39	58	27	30	5.36	105	263	86.63	31	5.66	9	14.5	211	288	1.162	4.5	144	5.13	2.325	3.646	70	2.01	6.5	0.717	0	0	27	263	211	4.5
120117	1	68	4	1	2248.12503	2364.577978	17	40	61	18	26	5.71	102	83	88.4	25	5.44	18	10.7	150	281	1.195	4.2	140	11.97	2.2	5.301	65	1.298	4.1	1.066	0	0	18	83	150	4.2
117000	1	64	4	1	10918.76899	11118.7013	17	39	80	21	23	3.21	98	151	73.37	26	7.16	19	14.9	139	274	1.195	5	137	5.13	2.375	2.534	65	0.756	7.2	0.786	2	2	21	151	139	5
123913	1	62	4	1	10867.51222	11617.18013	17	44	78	16	24	7.14	105	58	98.12	24	4.77	12	14.5	119	289	1.162	4.2	144	8.55	2.325	4.991	68	1.084	7.6	0.992	0	0	16	58	119	4.2
110961	1	60	4	1	18286.66667	19804.85747	17	35	93	19	25	5.71	105	199	70.72	32	6.55	22	17.6	137	284	1.162	4.1	141	6.84	2.15	4.422	67	2.506	7.6	1.049	2	2	19	199	137	4.1
123972	1	60	4	1	9679.448821	10746.14017	17	40	67	20	25	6.43	98	198	95.47	34	4.55	27	9.1	156	271	1.066	3.8	135	10.26	2.325	6.413	74	1.208	6.9	0.782	1	1	20	198	156	3.8
116728	2	59	4	1	6423.914449	6974.974535	17	40	77	21	26	4.64	101	171	56.58	35	5.66	17	10.2	NA	278	1.066	3.6	139	5.13	2.225	7.655	75	7.429	5	0.968	1	1	21	171	164	3.6
118295	1	59	4	1	3093.80657	3367.583975	17	43	71	19	27	5	101	117	83.1	29	6.27	22	20.1	186	281	1.098	4.2	140	3.42	2.35	5.87	72	2.1	5.5	0.736	NA	3	19	117	186	4.2
111263	1	57	4	1	39886.07242	42899.24614	17	45	45	16	26	8.93	100	79	76.02	31	5.5	21	14.1	170	288	1.13	4	142	6.84	2.375	5.715	76	0.937	5.7	0.823	2	2	16	79	170	4
119075	2	56	4	1	14258.29904	15488.92996	17	44	72	19	28	3.93	99	71	49.5	29	4.88	19	15.9	168	282	1.356	3.8	142	3.42	2.325	6.232	73	0.858	3.5	0.751	2	2	19	71	168	3.8
110090	1	56	4	1	28434.95684	31670.06514	17	35	97	18	25	3.93	105	101	105.2	28	7.22	30	12.4	133	288	0.775	3.3	144	5.13	2.125	4.758	63	2.597	8	1.2	2	2	18	101	133	3.3
113425	2	55	4	1	21337.83151	21945.98568	17	45	92	19	24	5	100	81	70.72	23	5.05	11	14.7	124	274	1.195	4.5	137	5.13	2.475	7.267	68	1.163	3.8	0.997	2	2	19	81	124	4.5
113276	2	55	4	1	16146.44354	18576.88235	17	38	97	23	27	4.28	102	204	59.23	37	4.72	49	18.4	145	278	1.195	4.4	140	11.97	2.3	5.379	75	1.027	4.2	0.815	2	2	23	204	145	4.4
114798	2	55	4	1	8074.206091	8668.678335	17	41	73	21	29	4.64	102	54	52.16	33	5.05	10	22.9	137	285	1.356	4.7	143	13.68	2.375	5.896	74	1.118	3.9	0.755	2	2	21	54	137	4.7
111062	1	55	4	1	25663.15729	28551.37211	17	37	73	15	21	14.28	103	158	195.36	29	9.99	14	13.3	188	296	1.292	4.8	141	3.42	2.25	8.844	66	3.635	7.3	1.15	2	2	15	158	188	4.8
110742	1	55	4	1	4060.292071	4073.812686	17	38	60	21	25	4.28	101	241	82.21	30	4.94	23	13.8	147	280	1.13	4.1	141	5.13	2.2	5.534	68	1.344	6.4	0.832	0	0	21	241	147	4.1
109977	2	53	4	1	19758.16783	22722.17729	17	36	83	19	26	4.64	103	67	53.92	34	4.77	16	13.1	152	281	1.13	3.9	141	5.13	2.2	5.715	70	1.14	4.9	1.023	NA	3	19	67	152	3.9
122889	2	53	4	1	8095.573318	9188.09719	17	42	51	20	27	4.64	96	124	46.85	34	5.83	15	14.1	144	272	0.969	3.2	136	6.84	2.35	4.241	76	1.682	7.5	0.891	NA	3	20	124	144	3.2
120887	2	53	4	1	6064.862704	6320.664501	17	40	124	19	29	3.21	100	83	46.85	34	6	13	15.8	190	282	1.001	3.6	142	8.55	2.3	5.56	74	1.208	4.3	0.614	2	2	19	83	190	3.6
114388	2	52	4	1	23152.90479	22589.48185	17	43	79	18	23	4.64	102	188	61	28	5.11	15	8.2	182	277	1.259	4	139	3.42	2.35	5.87	71	0.756	2.8	1.077	1	1	18	188	182	4
116283	1	52	4	1	153118.084	176860.447	17	41	82	17	27	4.64	102	69	88.4	25	5.05	22	19.2	149	283	1.162	4	142	10.26	2.25	4.577	66	0.835	5.9	1.2	2	2	17	69	149	4
109675	2	51	4	1	13742.98888	15033.76547	17	39	75	22	28	3.93	103	73	46.85	34	4.88	13	14.9	149	282	1.195	3.9	142	6.84	2.325	5.896	73	1.321	3.8	0.98	2	2	22	73	149	3.9
111632	1	50	4	1	16763.99355	18695.00805	17	39	55	20	29	5	106	100	77.79	29	4.88	12	9.5	111	287	1.098	4.7	144	5.13	2.25	4.112	68	0.598	3.9	1.05	NA	3	20	100	111	4.7
118576	1	50	4	1	14100.40745	14991.50494	17	42	69	13	27	7.5	103	72	83.1	34	9.66	32	15.9	133	298	0.969	4.3	146	5.13	2.35	7.422	76	14.666	5.3	0.99	1	1	13	72	133	4.3
116500	1	50	4	1	9381.357273	10614.4229	17	39	87	16	24	5	103	143	70.72	26	6.11	17	15.9	192	284	1.066	4.4	142	5.13	2.225	3.75	65	0.858	5.4	0.906	NA	3	16	143	192	4.4
112665	1	67	3	1	7841.662582	8419.981578	17	43	67	17	27	6.78	97	207	76.91	36	5.05	20	27	169	274	0.969	4.3	136	13.68	2.3	5.534	79	1.727	6	0.968	0	0	17	207	169	4.3
122595	1	65	3	1	11212.31125	12120.04496	17	36	105	14	22	10.71	98	61	136.14	43	9.33	34	9.1	130	291	1.259	4.9	141	10.26	2.35	4.577	79	1.897	7	1.037	2	2	14	61	130	4.9
114988	1	60	3	1	5215.720534	5306.707368	17	41	90	26	24	9.64	97	546	76.91	25	7.55	24	11.6	114	279	1.13	4.3	136	5.13	2.275	4.06	66	0.621	4.4	1.044	1	1	26	546	114	4.3
112137	2	54	3	1	14854.57375	15633.59265	17	36	160	14	23	3.93	103	75	38.9	31	16.26	21	15.8	149	286	1.098	4.1	138	10.26	2.25	5.017	67	0.892	2.8	0.845	0	0	14	75	149	4.1
113473	2	80	2	1	7551.054129	8214.401902	17	42	101	20	30	5	100	83	91.94	27	4.72	21	14.5	176	277	1.324	4.1	139	10.26	2.375	5.043	69	0.677	4.5	0.88	2	2	20	83	176	4.1
113541	1	79	2	1	6622.378021	7112.550294	17	43	72	21	31	5	97	159	83.98	32	5.22	45	17.6	114	281	0.969	3.8	141	6.84	2.35	4.267	75	1.614	5.2	1.07	0	0	21	159	114	3.8
123673	2	71	2	1	15879.30349	17518.72314	17	34	68	22	28	5.36	107	176	78.68	34	5.16	32	11.8	176	291	1.162	4.4	146	3.42	2.35	5.896	68	1.569	4.9	0.887	0	0	22	176	176	4.4
116030	1	70	2	1	4076.790463	4234.141404	17	41	60	20	27	8.57	107	241	150.28	34	10.99	20	10.9	237	300	1.033	4.6	146	6.84	2.35	3.051	75	0.835	5.2	1.64	0	0	20	241	237	4.6
121436	1	69	2	1	8591.374897	8889.603919	17	39	59	23	28	7.85	101	347	123.76	29	4.88	13	15.6	199	280	1.292	4	139	5.13	2.25	6.155	68	1.344	4.9	1.786	2	2	23	347	199	4
123853	1	67	2	1	2597.557448	2727.294253	17	43	46	17	24	4.64	105	232	69.84	33	5.61	13	15.6	174	285	1.001	3.9	143	10.26	2.375	3.982	76	0.869	5.5	1.153	NA	3	17	232	174	3.9
118614	2	66	2	1	6361.888319	6644.908873	17	40	133	19	25	5	100	209	92.82	35	4.77	27	16.1	213	287	1.066	4.6	144	3.42	2.375	5.25	75	1.14	5.1	0.824	2	2	19	209	213	4.6
117507	1	65	2	1	6080.135587	6549.923266	17	42	112	20	19	5	106	123	84.86	27	5	40	23.3	140	283	1.324	4.2	142	6.84	2.475	6.517	69	1.264	4.8	0.842	1	1	20	123	140	4.2
121001	2	64	2	1	9351.913152	10198.94379	17	46	114	23	24	4.28	103	114	68.07	28	4.66	43	26	144	280	1.033	4.2	141	8.55	2.375	5.405	74	0.7	4.3	0.911	2	2	23	114	144	4.2
116911	1	63	2	1	8031.348396	8574.893688	17	38	58	15	25	4.28	101	229	82.21	29	6.77	28	12.9	125	275	0.904	3.6	137	3.42	2.2	8.275	67	1.174	6.4	1.07	NA	3	15	229	125	3.6
117858	2	60	2	1	11215.50031	11934.84887	17	39	73	24	24	4.64	106	340	69.84	28	5.83	45	22.7	174	287	0.969	4.4	144	10.26	2.3	4.81	67	1.581	6.5	1.263	1	1	24	340	174	4.4
124025	2	59	2	1	12368.37899	12778.71608	17	39	59	17	27	4.28	100	290	55.69	27	6.61	30	8.2	135	280	1.066	3.6	140	5.13	2.275	4.138	66	2.032	6.7	1.093	2	2	17	290	135	3.6
114682	2	56	2	1	14904.99604	16978.92815	17	38	70	18	30	4.28	104	227	78.68	35	4.94	24	13.1	151	282	1.195	4.2	142	3.42	2.3	4.319	73	1.355	5.3	1.255	2	2	18	227	151	4.2
109411	2	55	2	1	23366.74764	23374.37487	17	43	70	22	25	3.57	98	74	62.76	33	4.77	55	20.4	156	272	1.13	3.9	137	10.26	2.525	6.62	76	1.095	3.5	0.878	2	2	22	74	156	3.9
119094	2	51	2	1	3865.225807	4197.818285	17	36	77	19	25	6.07	102	278	77.79	35	5.55	19	14.7	127	283	1.098	4.2	141	5.13	2.3	4.939	71	1.039	6.5	1.139	2	2	19	278	127	4.2
123936	1	51	2	1	9836.559481	10232.39543	17	39	55	18	26	4.64	102	332	88.4	37	8.33	20	9.7	134	284	0.872	3.6	141	8.55	2.325	4.965	76	1.027	4.8	1.276	2	2	18	332	134	3.6
110987	1	51	2	1	8681.802388	9404.347121	17	44	47	19	26	5.71	104	335	126.41	27	4.83	14	14.1	152	287	1.227	4.3	144	11.97	2.275	4.81	71	0.689	5	0.977	2	2	19	335	152	4.3
114867	1	80	1	1	6472.721775	7785.168118	17	35	105	24	27	11.07	98	125	127.3	40	4.39	150	16.1	151	289	1.453	5.2	142	8.55	2.35	3.646	75	1.298	8.2	1.16	NA	3	24	125	151	5.2
114031	1	80	1	1	37326.33482	45464.40253	17	39	31	21	31	8.21	101	171	89.28	23	9.99	14	10.9	218	289	1.162	4.3	141	5.13	2.3	3.62	62	0.7	3.7	0.864	2	2	21	171	218	4.3
110311	2	79	1	1	67230.70824	74573.45255	17	42	43	31	25	7.85	100	63	69.84	33	4.88	10	19.7	165	278	1.162	4.3	138	8.55	2.425	3.362	75	0.768	3.6	1.099	1	1	31	63	165	4.3
110779	2	70	1	1	26672.15685	29750.67027	17	43	85	24	28	3.93	98	137	61.88	30	5.05	9	15	161	278	1.292	3.8	140	6.84	2.35	5.87	73	1.185	3.8	0.826	2	2	24	137	161	3.8
110751	2	69	1	1	19635.52061	19871.04244	17	37	83	14	27	7.14	99	66	83.1	31	6.27	16	10.7	181	281	1.098	4.1	139	5.13	2.3	4.112	68	1.479	7.6	0.777	0	0	14	66	181	4.1
124228	2	68	1	1	43804.01128	45230.56712	17	34	78	15	23	3.21	106	46	81.33	28	3.77	32	7.5	137	284	1.195	3.7	144	3.42	2.15	3.75	62	1.637	5	0.772	2	2	15	46	137	3.7
123247	2	67	1	1	58662.27028	63206.49478	17	39	52	18	29	9.28	104	71	58.34	26	5.27	13	12.5	147	291	1.098	3.6	144	3.42	2.275	4.784	65	1.344	5.6	1.061	NA	3	18	71	147	3.6
115192	2	67	1	1	34356.70623	35400.43797	17	40	60	18	27	5	101	43	61.88	29	6.33	16	21.1	154	283	1.098	4.2	141	8.55	2.3	5.715	69	1.581	4.1	1.037	1	1	18	43	154	4.2
118298	1	67	1	1	92654.3465	99227.18966	17	41	63	21	29	5.71	103	125	73.37	30	6.05	26	18.1	156	289	1.227	4.5	144	10.26	2.35	4.163	71	1.377	4.9	1.31	2	2	21	125	156	4.5
114008	1	66	1	1	8409.450353	8621.074895	17	38	251	16	28	8.57	98	52	547.2	39	2.78	321	11.3	148	281	1.518	4.1	140	20.52	2.4	3.569	77	0.937	3.5	1.199	0	0	16	52	148	4.1
121785	1	66	1	1	100759.1675	104813.5519	17	39	70	16	27	6.43	104	163	98.12	23	5	14	16.8	137	283	1.518	4.9	141	5.13	2.275	4.138	62	1.682	6	0.968	2	2	16	163	137	4.9
120311	2	65	1	1	70379.02704	71235.4953	17	41	89	18	24	4.28	107	122	57.46	29	5.61	15	16.5	188	285	1.195	4	143	8.55	2.325	4.138	70	1.727	4.5	0.864	2	2	18	122	188	4
116206	1	64	1	1	105574.5586	112658.7299	17	42	73	20	28	7.5	101	164	91.05	25	4.88	12	16.8	144	282	1.195	3.8	140	6.84	2.3	5.198	67	0.847	4.6	1.12	2	2	20	164	144	3.8
112532	2	63	1	1	35692.50071	36053.75877	17	41	103	18	26	4.64	102	72	73.37	31	4.72	14	13.6	156	286	1.162	3.9	144	5.13	2.3	5.793	72	0.79	3.8	1.075	2	2	18	72	156	3.9
121353	1	63	1	1	16433.83319	18132.15436	17	36	83	17	24	3.57	103	340	65.42	33	5.44	56	13.3	176	278	1.162	4.2	140	6.84	2.25	5.586	69	1.129	3.3	1.306	1	1	17	340	176	4.2
111749	1	63	1	1	16772.80893	18210.06748	17	41	93	23	26	6.78	99	131	84.86	30	5.22	24	16.3	181	281	1.13	4	140	6.84	2.325	4.913	71	2.269	5.1	1.109	1	1	23	131	181	4
111463	1	63	1	1	41482.00457	48193.07163	17	38	97	18	22	5.71	104	172	76.02	35	6.33	23	15.2	129	280	1.13	4	139	6.84	2.3	3.388	73	0.881	4.5	0.94	0	0	18	172	129	4
124115	1	60	1	1	80425.11305	86881.88233	17	43	60	28	26	5.71	101	110	80.44	27	6.44	21	25.1	153	282	1.13	4.4	140	11.97	2.3	4.707	70	1.219	5.4	1.065	2	2	28	110	153	4.4
113900	1	58	1	1	9860.41924	10832.784	17	34	88	14	27	6.43	102	72	82.21	32	3.89	19	10.6	164	283	1.13	3.9	142	6.84	2.25	5.56	66	1.05	6	1.002	NA	3	14	72	164	3.9
115036	2	54	1	1	191053.3502	216917.5299	17	38	47	18	23	5.36	101	31	72.49	27	4.55	17	14.1	130	272	1.356	3.9	136	8.55	2.25	4.448	65	0.576	2.7	1.137	2	2	18	31	130	3.9
116265	1	52	1	1	38010.38026	40538.08161	17	38	72	15	19	5.71	101	60	106.08	29	4.5	19	9.3	121	280	1.098	4.3	140	8.55	2.3	5.896	67	2.405	6.8	0.96	2	2	15	60	121	4.3
122956	2	51	1	1	32604.89694	33615.30569	17	41	116	16	24	3.93	100	78	88.4	33	9.55	14	10.4	123	283	1.388	5.1	140	5.13	2.475	5.767	74	2.619	4.7	0.909	0	0	16	78	123	5.1
110438	2	61	4	2	9582.605507	10450.53064	16	41	70	22	29	6.78	102	183	50.39	33	5.16	18	9.7	157	287	1.001	4.1	143	3.42	2.475	7.37	74	1.05	5.2	0.97	0	0	22	183	157	4.1
111117	2	60	4	2	34740.0168	35310.55521	16	36	117	14	22	6.78	102	27	84.86	28	7.77	15	13.6	177	282	1.227	4.5	139	5.13	2.3	4.293	64	1.411	5	1.224	2	2	14	27	177	4.5
123784	2	80	4	2	7722.125455	8545.719558	16	44	61	25	30	3.57	99	98	71.6	21	5.16	12	24.4	267	282	1.195	4.3	142	10.26	2.4	7.396	65	2.879	5.1	1.127	2	2	25	98	267	4.3
118348	2	80	4	2	14318.33756	15534.68908	16	41	97	17	27	5.71	98	97	62.76	33	4.55	31	10.4	163	280	1.356	3.7	140	5.13	2.4	6.465	74	2.258	3.9	0.989	1	1	17	97	163	3.7
119755	2	75	4	2	13898.38508	14756.13565	16	39	60	24	28	5	104	131	72.49	32	5.33	13	14.7	160	282	1.162	4.2	141	3.42	2.375	6.258	71	0.971	4.6	0.823	NA	3	24	131	160	4.2
120177	2	72	4	2	10566.29268	11804.64689	16	40	102	22	26	8.57	104	109	60.11	37	5.72	20	24	161	289	1.001	3.9	143	8.55	2.225	7.732	77	1.332	6.7	0.923	0	0	22	109	161	3.9
118479	1	68	4	2	10518.85493	11045.47592	16	42	105	14	27	10.71	96	53	69.84	39	8.77	19	17	120	287	1.259	4.1	139	5.13	2.425	4.138	81	1.163	4.9	0.698	0	0	14	53	120	4.1
117011	2	67	4	2	11097.85082	12421.01273	16	41	73	21	32	5	100	78	47.74	37	5.16	17	12.2	155	289	1.324	3.6	145	5.13	2.525	5.793	78	1.942	4.5	0.823	2	2	21	78	155	3.6
116623	2	65	4	2	11690.21289	12002.21253	16	39	85	18	28	2.86	102	75	53.92	31	5.22	18	17.9	147	287	0.969	3.5	145	8.55	2.225	7.293	70	2.326	4.9	0.943	0	0	18	75	147	3.5
122030	2	65	4	2	13820.44196	14086.9102	16	42	74	18	25	5.36	100	147	63.65	35	5.16	28	17.4	155	278	1.388	3.9	139	10.26	2.325	5.793	77	3.071	4.9	0.939	0	0	18	147	155	3.9
118699	2	65	4	2	25611.15767	28316.64511	16	39	70	17	20	4.64	104	121	76.02	26	4.77	20	14.3	150	277	0.904	3.8	139	10.26	2.2	5.508	65	1.716	4.5	0.68	0	0	17	121	150	3.8
115494	1	62	4	2	9553.116656	9842.190437	16	41	97	17	25	3.57	99	185	90.17	27	8.55	20	20.2	145	278	0.936	3.5	138	8.55	2.25	6.956	68	1.773	5.8	1.216	0	0	17	185	145	3.5
121993	1	79	3	2	18845.99798	20146.05246	16	40	70	16	26	5.71	100	67	75.14	25	6.61	43	12.5	154	284	1.098	3.9	141	8.55	2.275	4.06	65	1.31	5.7	1.202	NA	3	16	67	154	3.9
113815	1	71	3	2	3689.563713	4060.484539	16	42	105	17	19	7.14	106	184	86.63	25	5.44	24	2.5	190	286	1.195	4.7	142	3.42	2.15	3.853	67	0.802	6	0.939	0	0	17	184	190	4.7
112187	2	58	3	2	13188.12309	12976.37133	16	41	82	14	26	4.28	101	85	48.62	33	5.16	15	13.3	189	279	1.13	3.8	140	5.13	2.325	4.189	74	2.077	4.4	1.195	2	2	14	85	189	3.8
112347	1	56	3	2	25415.18406	26680.79413	16	44	89	19	29	7.14	99	78	96.36	34	5.66	18	14.7	130	280	1.066	4.4	139	11.97	2.325	4.526	78	2.292	5.2	0.959	0	0	19	78	130	4.4
118523	2	54	3	2	14345.77455	14454.26564	16	38	110	20	24	6.78	105	124	61	35	4.77	29	11.1	135	283	1.421	4.4	141	5.13	2.325	6.336	73	1.253	4.7	0.779	2	2	20	124	135	4.4
112712	1	61	2	2	6493.350543	6587.329429	16	39	66	18	27	4.64	104	270	76.91	33	5.05	59	13.6	187	281	0.969	4.5	141	23.94	2.375	5.172	72	0.598	6.2	0.977	NA	3	18	270	187	4.5
113298	2	58	2	2	8555.65387	8474.693212	16	44	66	18	27	3.57	101	135	60.11	28	6.55	23	9	215	283	1.259	4.2	142	5.13	2.475	3.414	72	0.914	3.4	0.937	0	0	18	135	215	4.2
109913	2	52	2	2	15202.46664	16412.66085	16	40	71	14	30	7.5	97	191	78.68	32	4.61	39	9.5	168	289	1.388	3	144	3.42	2.3	5.534	72	2.574	5.2	1.098	1	1	14	191	168	3
121029	1	76	2	2	6159.049032	6598.525808	16	38	73	17	26	6.43	101	99	99.89	33	6.11	26	13.3	141	284	1.098	4	141	10.26	2.2	3.491	71	0.79	4.3	0.784	0	0	17	99	141	4
120793	2	70	2	2	4914.859966	5389.917885	16	41	72	19	24	5.71	106	134	61	32	5.94	15	17.9	197	287	1.227	4	143	6.84	2.225	4.577	73	0.982	5.4	1.005	NA	3	19	134	197	4
124396	1	68	2	2	5145.426283	5475.355771	16	37	46	17	24	6.07	107	48	103.43	33	7.55	16	11.6	134	294	0.969	4.1	146	5.13	2.3	3.853	70	1.197	5.7	1.021	NA	3	17	48	134	4.1
116906	2	66	2	2	6868.153661	7306.150465	16	44	74	20	31	3.93	100	166	81.33	29	4.72	21	16.8	174	280	1.292	4	141	10.26	2.3	4.06	73	1.073	5.8	1.165	0	0	20	166	174	4
115788	2	65	2	2	5623.523659	5988.283804	16	44	57	19	25	6.78	100	130	53.04	29	4.61	22	13.8	208	283	1.033	3.7	141	13.68	2.575	6.129	73	0.948	6.2	1.14	2	2	19	130	208	3.7
110200	2	60	2	2	11213.83322	12035.65735	16	40	95	20	23	5.36	107	309	68.07	33	5.44	17	13.8	251	288	1.13	4	144	6.84	2.375	5.146	73	0.892	5.2	1.116	0	0	20	309	251	4
118935	1	60	2	2	6895.550837	7369.558567	16	38	76	18	22	4.28	101	155	83.1	40	5.61	30	29.9	136	276	1.001	4	138	10.26	2.325	5.948	78	1.298	6.5	0.938	0	0	18	155	136	4
120346	2	58	2	2	13155.07813	13652.19272	16	38	111	16	23	6.07	102	86	81.33	44	13.27	23	11.1	166	287	1.227	4.2	139	3.42	2.35	6.439	82	1.727	7.6	0.975	0	0	16	86	166	4.2
114311	1	58	2	2	9842.187517	10804.58819	16	35	78	18	26	9.64	96	179	216.58	36	18.65	27	9.9	160	292	1.453	4.2	137	5.13	2.25	5.974	71	2.721	8.4	1.149	2	2	18	179	160	4.2
123128	1	58	2	2	19420.24782	20992.53206	16	41	97	21	25	3.21	102	275	91.94	38	5.05	32	9.9	NA	280	1.066	4.7	141	5.13	2.35	5.379	79	1.592	6.1	1.047	0	0	21	275	164	4.7
122902	1	57	2	2	4045.519983	4454.890872	16	36	68	16	25	2.5	103	56	110.5	29	5.55	96	18.8	109	277	0.84	4.7	140	3.42	2.625	4.293	65	0.553	6.3	1.038	0	0	16	56	109	4.7
116871	2	56	2	2	3349.98459	3658.013077	16	40	52	23	24	5.71	107	389	80.44	27	4.83	31	15.6	220	287	1.162	4	144	6.84	2.375	5.534	67	0.666	3	0.998	0	0	23	389	220	4
113376	2	56	2	2	15173.26142	16381.13074	16	39	107	20	29	7.14	102	66	104.31	44	5.55	27	13.8	142	291	1.066	4.4	145	6.84	2.375	6.336	83	1.705	7.9	0.935	0	0	20	66	142	4.4
111779	2	53	2	2	36316.29089	38984.0269	16	38	67	17	25	3.93	100	111	91.94	36	4.94	18	7.3	144	282	1.195	4.2	142	3.42	2.3	3.698	74	1.389	6.9	1.11	2	2	17	111	144	4.2
119556	2	52	2	2	43623.41691	49340.35921	16	40	61	20	26	2.86	101	173	45.97	29	4.33	20	19	154	273	1.195	3.7	138	8.55	2.325	5.844	69	0.542	2.6	0.961	1	1	20	173	154	3.7
116327	1	51	2	2	6221.132888	6698.772089	16	46	58	19	23	7.14	102	337	91.05	32	4.61	24	8.8	153	281	1.066	4.8	140	5.13	2.325	4.81	78	0.485	6.1	0.976	2	2	19	337	153	4.8
114473	1	73	1	2	65861.32433	77830.59154	16	38	57	16	27	8.21	101	55	91.05	29	4.88	20	17.2	131	284	1.388	4.3	141	6.84	2.35	5.017	67	0.519	8	0.942	2	2	16	55	131	4.3
122415	1	60	1	2	20217.38418	21949.80768	16	40	80	22	24	3.93	102	251	76.91	29	4.88	15	14.5	166	276	1.001	3.9	139	11.97	2.25	5.793	69	1.084	4.9	1.029	0	0	22	251	166	3.9
109350	1	59	1	2	13693.37698	14768.6033	16	43	121	23	27	5.71	98	173	90.17	37	5.77	43	14.7	198	281	1.195	4.6	140	5.13	2.25	5.689	80	0.655	6.4	1.174	0	0	23	173	198	4.6
119202	2	80	1	2	15844.63176	20083.35365	16	41	76	23	22	10.35	105	135	96.36	25	5.11	69	23.3	250	287	1.259	4.3	141	8.55	2.225	5.12	66	2.811	4.2	1.142	2	2	23	135	250	4.3
119172	2	80	1	2	35783.1697	43877.91358	16	39	83	20	23	6.43	102	202	91.05	30	5.11	13	14.1	183	277	1.227	4	138	6.84	2.45	6.025	69	2.427	5.8	0.931	1	1	20	202	183	4
112947	2	80	1	2	11577.95409	15122.61324	16	42	85	20	25	6.78	101	99	73.37	29	5.66	14	13.3	197	282	1.388	3.8	140	15.39	2.425	7.525	71	2.676	3.4	0.8	1	1	20	99	197	3.8
114965	2	80	1	2	29349.15499	33318.36902	16	39	63	20	26	7.85	100	53	86.63	29	5.38	18	17.2	141	281	1.356	4.1	139	10.26	2.575	5.431	68	1.727	7.1	0.784	1	1	20	53	141	4.1
113475	2	80	1	2	25070.59538	29065.07183	16	41	60	17	28	8.21	100	85	72.49	29	5.61	15	14.7	150	285	1.388	4.2	141	10.26	2.325	5.637	70	1.174	5.2	0.728	0	0	17	85	150	4.2
111643	1	80	1	2	30096.88327	36503.52939	16	40	70	23	29	12.5	98	163	94.59	24	4.44	16	15.6	220	283	1.13	4.4	138	6.84	2.275	4.577	64	0.802	6.5	1.106	2	2	23	163	220	4.4
112639	2	79	1	2	35806.96614	41921.47426	16	42	57	15	28	7.85	100	59	84.86	32	6.55	12	14.5	146	288	1.066	3.3	142	13.68	2.55	4.655	74	1.389	5.7	0.98	0	0	15	59	146	3.3
113286	1	75	1	2	2852.056756	2990.176913	16	41	104	18	23	4.28	101	59	104.31	31	4.83	31	24.4	147	280	1.162	3.8	141	11.97	2.325	5.612	72	1.942	5.4	1.035	0	0	18	59	147	3.8
116915	2	72	1	2	35718.34969	38095.30396	16	42	66	19	24	6.07	102	56	78.68	30	4.77	23	13.6	169	282	1.162	4.1	141	5.13	2.45	5.327	72	2.066	6.8	1.196	2	2	19	56	169	4.1
113201	2	70	1	2	35828.72642	41703.58321	16	45	70	21	26	7.5	97	172	103.43	33	5.66	9	16.5	210	281	1.066	4.4	139	6.84	2.425	5.612	78	1.231	6	1.082	2	2	21	172	210	4.4
119617	2	66	1	2	112516.7235	118817.9234	16	41	82	15	24	7.14	103	84	95.47	28	5	30	17	190	283	1.227	3.8	141	10.26	2.3	5.094	69	1.05	6.1	0.975	2	2	15	84	190	3.8
118123	2	65	1	2	35793.09118	36396.43197	16	38	66	17	28	12.14	92	117	119.34	38	11.32	22	15.4	150	287	1.453	3.6	137	10.26	2.65	3.517	76	2.224	7.3	1.145	0	0	17	117	150	3.6
116351	2	63	1	2	35986.65357	35657.40933	16	37	46	12	27	7.14	104	38	80.44	27	4.66	16	22.4	189	285	1.421	4.1	142	6.84	2.375	5.534	64	1.558	5.8	0.865	2	2	12	38	189	4.1
114021	1	63	1	2	16810.30894	19106.75212	16	41	67	18	29	3.93	103	136	72.49	26	5	25	27	176	286	0.936	3.9	144	10.26	2.225	4.707	67	1.705	4.5	0.895	0	0	18	136	176	3.9
118150	2	60	1	2	42522.47236	45941.16315	16	40	99	12	24	6.07	98	37	45.97	31	11.82	52	14.5	112	278	1.162	4.2	135	5.13	2.35	6.775	71	2.179	4.2	0.771	1	1	12	37	112	4.2
113287	2	59	1	2	26686.71158	28643.41044	16	41	68	18	27	4.64	99	79	82.21	28	5.11	15	16.3	139	277	1.227	4	139	5.13	2.3	5.663	69	0.745	5.2	1.022	0	0	18	79	139	4
114789	1	57	1	2	9293.823491	9831.899474	16	40	103	18	28	8.57	101	417	70.72	24	7.72	30	12	134	289	1.324	4	142	8.55	2.475	3.439	64	2.123	9.7	1.309	0	0	18	417	134	4
114935	2	56	1	2	136895.7838	154471.9816	16	40	76	18	29	4.28	100	59	58.34	32	5.11	14	22.2	127	283	1.485	4	142	6.84	2.35	5.663	72	1.377	4.2	0.978	2	2	18	59	127	4
109816	2	55	1	2	70993.82947	71981.05794	16	36	70	22	30	6.07	98	102	67.18	30	4.44	10	20.2	188	280	1.259	4.5	140	8.55	2.3	4.422	66	0.994	3.8	0.931	2	2	22	102	188	4.5
114596	1	78	4	1	9865.360705	10211.20255	16	44	133	21	28	8.21	98	152	92.82	35	5.77	27	13.4	244	280	1.033	4.6	138	11.97	2.475	4.37	79	1.129	5.8	0.863	0	0	21	152	244	4.6
120762	2	74	4	1	14476.10789	16128.54128	16	33	80	17	26	5.36	103	65	78.68	39	4.77	16	21.3	144	285	1.098	3.9	143	8.55	2.25	3.439	72	0.508	5.1	1.128	2	2	17	65	144	3.9
118491	1	72	4	1	7549.267891	8135.388432	16	44	64	21	23	4.28	105	97	80.44	25	4.77	23	19	137	280	1.001	4.5	141	11.97	2.35	3.982	69	1.095	4.7	1.072	0	0	21	97	137	4.5
117133	2	71	4	1	14720.85375	16829.85747	16	40	66	22	28	5.36	92	125	68.07	32	5.44	14	24	159	271	1.13	3.1	135	11.97	2.325	5.819	72	1.75	6.1	0.918	1	1	22	125	159	3.1
116739	2	69	4	1	12019.69527	12930.43795	16	46	66	26	26	5	102	197	58.34	28	4.94	11	12.4	178	287	1.066	3.6	144	6.84	2.275	5.793	74	0.655	4.2	0.761	NA	3	26	197	178	3.6
113870	1	69	4	1	8841.23456	9003.125383	16	39	55	14	31	4.64	100	45	104.31	34	3.5	35	21.7	115	272	1.227	4.6	137	17.1	2.45	4.81	73	2.845	5.9	1.031	2	2	14	45	115	4.6
119324	1	69	4	1	5370.851308	5685.474602	16	43	89	19	23	6.43	103	180	70.72	30	5.22	11	10.7	165	281	1.292	4.1	140	5.13	2.275	4.189	73	1.547	4.3	0.79	0	0	19	180	165	4.1
117884	2	66	4	1	8450.873132	8784.937135	16	40	67	22	26	5.36	97	104	62.76	34	4.94	14	17.6	168	274	1.098	3.4	137	8.55	2.375	6.232	74	1.31	3.3	0.841	0	0	22	104	168	3.4
118505	2	65	4	1	9808.353121	10438.86751	16	45	61	15	27	6.07	98	147	55.69	34	6.77	28	15	155	282	1.162	3.7	140	6.84	2.425	3.982	79	0.723	5.2	1.017	0	0	15	147	155	3.7
124724	1	65	4	1	5862.896346	6451.793274	16	37	53	17	24	6.07	106	909	112.27	36	2.66	15	10	240	287	0.84	4.3	145	5.13	2.15	5.612	73	2.506	7.9	1.123	2	2	17	909	240	4.3
116472	2	64	4	1	7528.047496	8106.310201	16	40	75	18	24	4.28	107	80	66.3	25	5.55	19	19.7	154	287	0.904	4.1	144	8.55	2.3	3.931	65	1.581	3.5	1.041	0	0	18	80	154	4.1
120603	1	64	4	1	3421.263627	3701.58938	16	38	97	16	25	6.78	104	131	68.07	28	4.88	21	15.2	189	283	0.936	4.1	141	18.81	2.225	6.336	66	1.355	6.5	0.989	0	0	16	131	189	4.1
115082	2	63	4	1	14241.12131	15182.33502	16	46	50	15	25	3.93	102	119	53.92	29	5.94	44	10.7	186	287	1.13	3.5	144	10.26	2.375	5.741	75	1.592	5.9	1.048	2	2	15	119	186	3.5
114331	2	63	4	1	10779.05894	11606.2049	16	44	77	23	25	3.57	97	312	68.95	32	5.38	14	16.1	162	273	0.872	3.4	137	6.84	2.325	5.482	76	1.648	5.5	0.988	2	2	23	312	162	3.4
123146	2	63	4	1	16081.23555	16962.74096	16	41	61	15	25	4.28	100	68	61	35	4.72	11	20.1	140	280	1.356	4.2	141	10.26	2.225	6.103	76	2.292	5.1	0.826	NA	3	15	68	140	4.2
117275	1	63	4	1	10641.10259	11953.33643	16	45	61	15	27	4.28	103	110	72.49	30	5.88	32	15.4	116	287	1.001	4.6	144	6.84	2.4	3.75	75	2.01	6	1.032	1	1	15	110	116	4.6
116213	1	62	4	1	9685.222287	10028.9193	16	43	75	21	30	5.36	100	196	89.28	38	6.22	24	18.1	167	287	1.195	4.7	143	11.97	2.45	4.163	81	2.055	7.8	1.474	2	2	21	196	167	4.7
117652	1	62	4	1	10702.09421	11335.84617	16	43	132	11	24	4.28	95	47	60.11	28	18.21	36	10	117	283	1.033	3.9	135	6.84	2.35	7.344	71	1.727	3.1	0.996	2	2	11	47	117	3.9
118914	1	60	4	1	6940.093475	7521.149264	16	44	58	16	28	4.64	102	97	78.68	29	7.55	33	21	114	289	0.969	4	144	11.97	2.35	4.526	73	2.552	5.7	0.924	NA	3	16	97	114	4
113440	2	58	4	1	23961.1477	23098.30962	16	40	101	17	21	4.64	105	36	73.37	27	5.83	13	34.7	124	276	1.13	3.9	138	6.84	2.325	4.913	67	1.908	5.1	0.901	2	2	17	36	124	3.9
121987	1	57	4	1	12734.95203	13558.90842	16	38	94	25	24	5.71	103	76	80.44	32	4.88	38	5.6	207	280	1.066	4.2	140	3.42	2.15	5.043	70	1.84	3.9	0.96	0	0	25	76	207	4.2
111402	2	54	4	1	8060.540391	8133.737784	16	45	50	23	27	5.36	104	121	60.11	33	4.72	13	20.1	194	285	1.453	4.2	143	17.1	2.4	4.991	78	0.79	4.4	0.951	0	0	23	121	194	4.2
114530	2	52	4	1	14315.19039	16608.97795	16	42	74	20	28	4.28	98	123	62.76	32	4.77	14	15.9	171	282	1.421	3.7	142	5.13	2.4	5.87	74	2.134	4.9	0.783	0	0	20	123	171	3.7
113860	2	51	4	1	3641.303193	4026.459861	16	36	55	15	25	5.36	102	44	56.58	31	6.44	28	2.3	143	287	1.55	4.3	143	6.84	2.175	4.241	67	1.095	4.3	1.105	2	2	15	44	143	4.3
116435	2	51	4	1	11529.05895	12611.89759	16	42	140	24	27	4.64	104	79	57.46	36	5.61	29	12.9	139	289	1.066	4.1	145	8.55	2.4	5.689	78	1.095	6.7	0.8	2	2	24	79	139	4.1
119855	1	50	4	1	16763.99355	18695.00805	16	44	63	15	29	5.71	103	71	100.78	28	5.27	22	15.4	94	286	1.066	4.1	143	10.26	2.4	5.275	72	1.908	7.5	0.978	2	2	15	71	94	4.1
111226	1	80	3	1	6485.235119	6855.09269	16	38	72	29	27	4.28	104	125	58.34	29	5.61	32	9	179	289	0.807	3.7	145	8.55	2.3	4.241	67	2.19	5.7	1.003	0	0	29	125	179	3.7
111215	1	67	3	1	6454.750779	6932.999678	16	42	107	16	23	6.43	101	244	72.49	25	24.37	20	21	187	298	1.388	4.8	139	6.84	2.375	4.086	67	0.948	4.5	1.015	0	0	16	244	187	4.8
112939	2	63	3	1	11083.68768	11751.62757	16	43	108	17	27	3.93	100	72	54.81	30	5.05	33	17.4	165	280	1.324	3.7	141	3.42	2.3	5.896	73	4.629	4.8	0.785	1	1	17	72	165	3.7
114995	2	62	3	1	12846.70757	14006.75083	16	39	69	21	24	6.43	107	168	44.2	25	5.94	14	12.7	189	289	1.033	4	144	5.13	2.25	3.698	64	1.027	2.3	0.871	0	0	21	168	189	4
121459	1	62	3	1	3417.376798	3590.748438	16	38	67	14	25	4.64	99	165	89.28	25	4.39	21	13.4	153	275	1.066	3.8	138	8.55	2.075	4.215	63	1.987	4.5	0.99	0	0	14	165	153	3.8
111525	1	61	3	1	5644.810022	6181.258166	16	43	93	18	28	7.14	101	87	88.4	29	4.55	22	17.7	171	287	1.227	4	143	8.55	2.275	4.267	72	2.077	4.5	1.007	2	2	18	87	171	4
109915	1	58	3	1	16559.16438	16571.91808	16	43	80	15	27	5.36	99	49	97.24	28	5.5	15	21.3	144	280	1.13	4.3	140	11.97	2.375	5.922	71	1.49	4.3	1.097	2	2	15	49	144	4.3
112444	2	57	3	1	8179.862962	8107.134626	16	39	64	20	25	4.28	101	119	46.85	34	6.55	28	24.2	182	284	1.098	4.3	142	6.84	2.325	6.155	73	1.547	5.3	0.9	0	0	20	119	182	4.3
121506	1	53	3	1	11274.00687	12025.75902	16	45	92	20	26	7.85	99	308	70.72	34	7.05	23	18.3	184	282	0.807	4	139	13.68	2.2	5.198	79	0.79	5.8	1.26	1	1	20	308	184	4
109771	2	79	2	1	17931.2796	19650.41136	16	43	94	27	26	6.43	104	138	79.56	30	5.44	23	10.6	232	283	1.13	4.3	141	6.84	2.3	3.207	73	1.027	3.3	0.946	2	2	27	138	232	4.3
116816	1	76	2	1	4113.49996	4386.433005	16	39	69	19	24	5.71	101	144	91.05	32	6	14	12	122	270	0.969	4	134	6.84	2.25	4.396	71	1.174	5.9	0.935	NA	3	19	144	122	4
110615	2	75	2	1	13028.84958	14424.25465	16	38	86	21	26	4.64	102	497	66.3	30	5.11	24	10.9	249	281	1.227	3.7	141	3.42	2.25	6.698	68	0.847	3.4	1.096	2	2	21	497	249	3.7
118581	1	71	2	1	5697.66836	6075.711872	16	39	81	20	29	4.28	100	169	72.49	33	5.27	42	14	193	273	0.84	4.3	137	6.84	2.4	3.439	72	0.677	5.2	1.186	2	2	20	169	193	4.3
118599	1	69	2	1	2681.333578	2825.772177	16	38	106	24	29	5	100	109	69.84	41	4.88	25	13.4	213	285	1.001	4.7	143	6.84	2.225	4.086	79	0.711	8	1.56	2	2	24	109	213	4.7
123231	1	67	2	1	7231.974258	7916.092753	16	35	184	16	35	8.57	93	180	560.46	42	4.77	278	14.7	136	277	1.421	4.1	137	8.55	2.625	4.732	77	0.745	2.6	1.191	2	2	16	180	136	4.1
110522	1	64	2	1	3947.513868	4234.848578	16	44	104	19	23	5.71	98	253	74.26	35	6	38	17.6	227	277	1.195	4.3	138	6.84	2.475	3.982	79	0.903	4.8	1.324	2	2	19	253	227	4.3
116325	1	62	2	1	9952.838187	10440.56905	16	40	81	16	30	8.57	97	201	109.62	33	5.5	22	10.6	168	282	1.13	3.8	139	8.55	2.375	5.353	73	1.016	8.1	1.069	0	0	16	201	168	3.8
110909	2	61	2	1	11517.43777	11883.56321	16	38	118	18	27	4.64	100	180	70.72	36	5.55	25	11.1	210	281	1.324	3.3	141	3.42	2.35	6.206	74	1.197	5.7	1.058	NA	3	18	180	210	3.3
113648	1	61	2	1	6292.263703	6749.924064	16	38	92	13	26	6.78	103	111	151.16	32	7.99	21	10.2	161	282	1.033	4.5	139	6.84	2.275	4.681	70	1.739	7.3	1.245	2	2	13	111	161	4.5
120212	1	61	2	1	8212.50663	8768.312343	16	44	58	16	31	5	101	177	114.92	28	5.72	30	12.2	122	286	1.259	3.7	143	8.55	2.5	6.103	72	1.355	7.2	0.734	0	0	16	177	122	3.7
116354	2	56	2	1	9849.289808	10066.24215	16	37	80	21	26	4.64	102	167	66.3	36	6.61	56	4.1	166	284	1.066	3.9	142	5.13	2.225	4.344	73	1.276	6.4	1.113	2	2	21	167	166	3.9
118578	1	53	2	1	16380.28586	16553.84681	16	43	54	21	25	3.93	100	143	103.43	31	5	13	16.7	152	282	1.162	4.2	142	15.39	2.325	6.905	74	1.626	6	1.038	2	2	21	143	152	4.2
123879	2	80	1	1	28948.77185	34606.07658	16	43	51	18	27	7.5	98	164	76.02	25	5.27	18	7.3	193	278	1.356	3.5	138	3.42	2.25	6.439	68	2.71	4.5	1.128	NA	3	18	164	193	3.5
115096	1	80	1	1	7557.726072	9109.774666	16	42	75	24	24	7.14	105	151	82.21	27	5.44	38	16.3	180	289	1.227	4.2	144	11.97	2.25	3.258	69	0.418	6.9	1.298	1	1	24	151	180	4.2
111823	1	80	1	1	23481.12348	26996.65292	16	43	92	18	25	7.5	101	45	104.31	20	4.88	23	19.3	136	286	1.356	4.9	142	10.26	2.325	4.707	63	2.405	6.7	0.863	0	0	18	45	136	4.9
118017	2	79	1	1	29691.11991	31552.03535	16	40	78	18	26	8.21	104	81	85.75	23	5.44	15	15.2	161	289	1.033	4.2	143	17.1	2.4	3.905	63	1.513	5.1	1.126	2	2	18	81	161	4.2
119403	1	79	1	1	20393.48962	23075.72444	16	41	102	17	26	6.43	105	52	75.14	26	4.94	22	16.8	140	288	1.033	4.3	144	8.55	2.4	4.241	67	1.626	5.4	1.181	2	2	17	52	140	4.3
116057	1	79	1	1	54298.18677	60702.75691	16	39	121	18	29	4.64	95	156	101.66	38	6	81	3	161	276	1.066	4.2	138	3.42	2.375	4.37	77	1.084	4.7	1.151	2	2	18	156	161	4.2
121418	2	77	1	1	43355.42294	47557.37632	16	40	79	21	28	5.36	104	108	61	26	5.38	14	11.3	159	286	1.388	4	143	6.84	2.275	4.138	66	0.587	4.3	0.794	2	2	21	108	159	4
109864	2	75	1	1	50939.25676	55916.55091	16	40	69	18	28	5	103	95	53.04	26	5.33	12	16.1	183	283	1.066	4.8	142	10.26	2.325	6.905	66	0.903	3.8	0.874	2	2	18	95	183	4.8
116135	1	75	1	1	21775.85527	23264.05669	16	37	62	13	23	5.71	103	92	82.21	31	6.99	20	10.6	123	282	0.969	4.4	140	5.13	2.325	5.456	68	1.727	5.3	1.059	2	2	13	92	123	4.4
115371	2	74	1	1	38950.56238	41366.74781	16	45	76	20	26	6.78	100	195	64.53	20	4.44	15	13.3	190	279	1.162	4.2	139	8.55	2.375	5.922	65	1.061	6.3	1.363	1	1	20	195	190	4.2
119591	2	69	1	1	63272.63745	63041.49781	16	42	105	19	25	5.36	101	90	69.84	30	4.83	13	13.1	189	280	1.033	3.7	140	6.84	2.325	6.129	72	1.129	5.3	0.806	2	2	19	90	189	3.7
123162	1	69	1	1	34979.66774	38038.14207	16	37	65	14	29	9.28	101	101	83.98	30	6.66	25	10	159	287	1.033	4	141	5.13	2.325	5.637	67	1.603	5.7	1.042	2	2	14	101	159	4
119435	2	66	1	1	43669.13508	45532.53407	16	45	93	26	27	3.21	100	69	56.58	25	5.05	19	14.3	176	283	1.324	3.9	143	5.13	2.3	7.034	70	2.552	3.9	0.685	2	2	26	69	176	3.9
111514	2	64	1	1	105263.7249	109582.3928	16	42	82	20	27	3.57	102	55	62.76	37	4.88	23	15.4	190	280	1.162	4	141	8.55	2.35	5.456	79	0.858	6.2	0.778	2	2	20	55	190	4
111324	1	64	1	1	28214.01187	28502.62073	16	39	72	15	28	3.57	98	78	113.15	24	4.72	27	27.2	107	272	1.033	4.6	137	3.42	2.325	5.508	63	2.213	6.7	1.072	2	2	15	78	107	4.6
110886	1	64	1	1	16192.99745	18509.94592	16	39	89	16	26	6.78	103	114	111.38	31	5.16	62	7.5	157	283	1.227	4.1	141	10.26	2.3	5.198	70	3.658	5.6	1.028	NA	3	16	114	157	4.1
117250	2	62	1	1	63216.62562	60650.26954	16	43	77	16	22	11.07	96	58	104.31	31	6.83	13	15.4	129	280	1.033	4	136	5.13	2.5	3.905	74	1.671	7.5	0.807	2	2	16	58	129	4
122572	1	62	1	1	18793.97592	18864.95369	16	38	90	17	26	4.64	108	153	79.56	26	4.72	11	20.8	195	288	1.098	5.3	145	10.26	2.275	3.982	64	0.734	5.3	0.93	0	0	17	153	195	5.3
122156	1	60	1	1	16864.59659	18138.6163	16	39	82	14	24	6.43	102	96	86.63	32	6.05	27	14.3	155	287	0.904	4.1	143	6.84	2.25	3.491	71	1.389	8.1	1.2	0	0	14	96	155	4.1
109468	1	60	1	1	12535.07564	14054.45475	16	42	83	14	20	3.93	107	120	45.08	26	5.11	21	18.4	191	282	1.13	3.7	142	8.55	2.325	5.612	68	1.163	4.9	1.126	0	0	14	120	191	3.7
124624	2	59	1	1	98960.7735	108632.02	16	44	68	21	27	2.5	99	106	61	28	4.83	12	21.3	182	273	1.195	4.2	138	6.84	2.4	4.551	72	0.835	2.9	0.932	2	2	21	106	182	4.2
114958	1	59	1	1	15800.7359	17284.08535	16	41	81	21	28	2.86	101	104	59.23	33	4	110	16.8	158	278	1.066	4.4	141	5.13	2.25	3.905	74	2.992	5.6	1.228	0	0	21	104	158	4.4
111795	1	59	1	1	81770.42044	91156.60384	16	40	46	19	29	6.78	100	239	105.2	30	4.39	12	15.4	145	281	1.098	4	140	3.42	2.25	6.827	70	2.043	7.9	1.082	2	2	19	239	145	4
123728	2	58	1	1	109434.6415	121760.6684	16	42	63	19	21	7.14	103	58	50.39	19	4.77	7	11.6	183	278	1.485	4.1	138	11.97	2.275	4.112	61	0.982	4.2	0.933	2	2	19	58	183	4.1
113037	2	54	1	1	18820.35299	18801.76786	16	38	98	15	25	3.93	103	106	61	34	4.77	13	13.3	168	278	1.13	4	140	5.13	2.325	5.844	72	2.585	5.7	1.082	0	0	15	106	168	4
123434	2	53	1	1	86144.41551	91002.90569	16	42	100	15	27	4.64	104	75	59.23	30	5.27	22	8.1	138	283	1.356	4.3	142	3.42	2.475	6.724	72	1.671	5.2	0.987	2	2	15	75	138	4.3
116654	2	50	1	1	105463.8323	113149.8069	16	45	86	23	25	8.21	97	153	66.3	24	5.22	58	15.8	168	275	1.388	4.5	136	3.42	2.35	5.637	69	2.653	6.2	1.059	2	2	23	153	168	4.5
111232	2	59	4	2	12945.50416	14542.14507	15	39	60	19	25	3.57	103	139	63.65	36	5.5	18	15.8	180	280	1.13	4	141	5.13	2.3	7.706	75	1.061	3.5	1.048	0	0	19	139	180	4
122950	2	50	4	2	9966.092882	10826.80583	15	36	79	13	27	3.93	100	54	76.02	34	5.05	18	6.8	216	277	1.162	4.5	139	3.42	2.275	5.819	70	1.129	5.2	1.098	NA	3	13	54	216	4.5
118026	2	80	4	2	15799.42326	17018.96654	15	36	76	17	30	8.21	100	31	64.53	40	5.94	96	11.1	138	297	1.162	3.7	147	6.84	2.45	6.724	76	1.806	7.7	0.796	2	2	17	31	138	3.7
121508	2	76	4	2	11747.36879	12359.45769	15	40	57	19	25	7.85	101	86	68.07	33	5.27	20	12.2	173	281	1.195	4.5	139	3.42	2.375	8.508	73	4.166	5	0.713	0	0	19	86	173	4.5
119239	2	71	4	2	22189.29737	24895.34337	15	42	97	14	30	4.28	95	60	45.08	23	6.55	13	12.9	139	277	1.421	4	138	8.55	2.425	4.034	65	2.484	4	0.967	0	0	14	60	139	4
109854	1	67	4	2	44640.41122	47919.22219	15	39	66	18	25	6.78	101	60	60.11	30	5.38	12	12.5	120	282	1.13	4	140	6.84	2.225	4.913	69	0.835	5.3	0.859	NA	3	18	60	120	4
113519	2	64	4	2	12653.35931	13488.88747	15	40	62	18	26	3.57	100	76	45.97	29	5.44	44	17	129	278	1.13	3.1	140	15.39	2.175	5.793	69	0.971	3.8	0.892	1	1	18	76	129	3.1
116084	2	54	4	2	20416.76799	23278.63727	15	30	118	18	26	19.64	106	87	419.02	33	6.05	14	10.2	222	314	2.293	4.5	150	5.13	2.075	3.62	63	1.344	6	1.016	2	2	18	87	222	4.5
113736	1	64	3	2	5759.185193	6170.075316	15	32	111	14	28	5.71	99	92	47.74	35	5.88	20	4.1	131	283	1.033	3.9	141	5.13	2.15	5.017	67	2.969	3.9	1.076	NA	3	14	92	131	3.9
119681	1	72	3	2	5356.387572	5772.254226	15	41	59	18	30	7.14	100	92	87.52	29	7.27	17	17.7	175	288	1.162	4.5	142	11.97	2.375	4.551	70	0.508	5.2	1.054	0	0	18	92	175	4.5
112124	1	71	3	2	9567.871645	10301.46966	15	39	107	15	27	7.85	102	107	57.46	35	5.55	19	22	139	283	1.001	5	140	10.26	2.3	5.896	74	1.558	6	0.84	NA	3	15	107	139	5
113385	1	62	3	2	4120.987376	4418.962489	15	38	103	23	22	4.28	102	173	68.07	37	6.22	31	52.5	165	276	0.84	3.8	138	15.39	2.225	5.405	75	1.163	6.6	1.153	0	0	23	173	165	3.8
111290	2	66	2	2	4762.457232	4925.783899	15	40	86	21	27	2.5	102	200	45.08	30	5.16	29	16.8	220	277	1.227	4.2	140	5.13	2.275	4.681	70	0.497	2.5	0.716	0	0	21	200	220	4.2
115058	1	63	2	2	9582.779008	10091.43746	15	45	134	27	26	4.28	102	526	76.02	39	4.88	21	21	155	282	0.936	4	142	15.39	2.375	3.439	84	0.598	4.4	0.893	NA	3	27	526	155	4
114754	2	57	2	2	6416.675818	7006.626911	15	33	77	16	25	3.93	99	331	66.3	35	10.32	27	13.1	175	280	1.13	4	138	8.55	2.05	5.431	68	2.698	7	1.642	0	0	16	331	175	4
113582	1	55	2	2	6692.51095	7289.626882	15	39	68	21	25	6.78	100	439	114.04	31	4.33	30	16.8	193	277	0.969	4.2	138	5.13	2.125	5.301	70	2.032	7.5	1.05	NA	3	21	439	193	4.2
120688	1	54	2	2	15590.73046	16338.15403	15	41	108	14	28	11.78	88	261	662.12	37	8.66	43	11.3	245	281	0.904	4.5	135	6.84	2.1	3.75	78	1.05	4.3	0.866	0	0	14	261	245	4.5
112186	2	51	2	2	16245.92882	17782.57226	15	40	102	24	22	4.28	102	284	61.88	43	5.22	37	12	218	279	1.033	3.8	140	5.13	2.325	4.913	83	1.49	4.8	0.969	0	0	24	284	218	3.8
123296	1	79	2	2	17199.2046	18071.56521	15	38	61	22	26	6.43	100	292	144.09	32	5.83	28	6.8	132	278	0.872	4.5	138	3.42	2.3	5.663	70	1.332	8.4	1.391	2	2	22	292	132	4.5
123729	2	78	2	2	23763.68751	26940.96345	15	38	114	17	25	7.5	99	150	64.53	34	5.88	17	13.3	191	288	1.001	3.8	143	5.13	2.45	4.448	72	1.084	6.2	1.042	0	0	17	150	191	3.8
117158	2	75	2	2	8078.411518	8920.446276	15	37	86	17	24	7.14	100	63	116.69	33	5.33	31	11.8	NA	284	1.13	4.1	141	5.13	2.475	4.655	70	1.49	6.2	1.051	0	0	17	63	164	4.1
112113	2	70	2	2	13703.94139	15152.70126	15	40	82	18	27	5	102	56	54.81	31	5.72	16	16.3	142	284	1.162	4	142	8.55	2.275	4.422	71	1.163	3.8	1.102	2	2	18	56	142	4
116662	2	69	2	2	7314.697534	7669.793918	15	41	91	19	24	6.07	101	143	55.69	34	5.16	20	9.1	181	284	1.195	4	142	5.13	2.35	5.974	75	0.903	5.3	1.069	NA	3	19	143	181	4
115047	2	62	2	2	14674.29302	15915.389	15	45	55	15	28	5.36	96	159	93.7	29	5.11	26	11.6	104	278	1.162	3.3	139	3.42	2.475	5.405	74	0.994	3.2	1.054	2	2	15	159	104	3.3
118105	2	59	2	2	6375.465912	7090.224602	15	42	71	20	30	3.21	98	106	55.69	32	4.88	50	23.3	154	281	1.453	4.2	142	5.13	2.375	6.724	74	2.856	5	0.743	NA	3	20	106	154	4.2
114403	2	54	2	2	20037.59414	21632.68926	15	33	71	50	24	2.14	99	332	64.53	46	5.66	110	6.4	175	270	1.292	4.9	136	10.26	2.325	3.336	79	0.847	5.5	1.036	0	0	50	332	175	4.9
121414	2	53	2	2	3628.275633	3766.262754	15	43	101	14	22	4.28	102	88	60.11	33	13.32	31	10.4	166	285	1.421	4	139	6.84	2.35	4.06	76	1.118	4.1	1.069	1	1	14	88	166	4
116846	1	52	2	2	6844.766586	7263.943522	15	38	101	18	27	2.86	103	246	115.8	33	5.38	17	16.1	169	281	0.84	4.4	142	13.68	2.3	5.12	71	1.118	6	1.112	2	2	18	246	169	4.4
118740	1	56	1	2	56248.8916	60900.54134	15	41	70	19	24	5	106	75	75.14	27	5.05	15	21.9	143	289	0.969	3.9	145	6.84	2.25	4.008	68	1.806	5.2	1.07	0	0	19	75	143	3.9
119291	2	80	1	2	30993.95969	37922.83053	15	38	83	18	24	9.28	107	68	83.98	25	5.55	28	12.7	205	292	1.162	4.8	144	8.55	2.3	5.844	63	1.298	6.6	1.077	2	2	18	68	205	4.8
109793	2	80	1	2	13733.79597	16875.55972	15	44	103	14	21	12.5	105	90	112.27	27	6.44	115	17.2	145	292	0.969	4.9	142	6.84	2.8	4.603	71	2.235	9.5	1.055	2	2	14	90	145	4.9
111008	2	80	1	2	9076.019174	10075.08807	15	43	79	21	26	4.64	101	120	75.14	28	6.05	14	13.3	173	284	1.033	2.8	142	5.13	2.3	4.836	71	1.761	5.3	1.027	0	0	21	120	173	2.8
116866	2	80	1	2	43229.12294	50059.68338	15	43	70	24	27	6.07	102	38	62.76	27	5.22	12	13.4	146	286	1.292	4.3	143	15.39	2.625	5.198	70	1.073	5.3	0.587	1	1	24	38	146	4.3
113869	1	80	1	2	5000.126289	5795.874572	15	43	47	18	28	5.71	102	107	81.33	24	5.05	15	18.3	207	284	1.066	3.9	142	6.84	2.325	4.784	67	1.377	3.2	1.35	1	1	18	107	207	3.9
113936	1	80	1	2	7441.018063	9160.913766	15	42	66	16	28	6.78	101	104	88.4	29	6.33	14	14.5	153	288	1.033	3.5	143	10.26	2.275	5.017	71	2.732	5.8	1.194	2	2	16	104	153	3.5
117220	1	80	1	2	15518.99933	19587.71943	15	45	87	20	26	6.43	99	86	80.44	26	4.94	24	20.1	179	281	1.162	3.7	140	10.26	2.25	5.922	71	0.79	5.1	0.907	2	2	20	86	179	3.7
119399	2	79	1	2	26194.47439	31233.71738	15	35	94	22	25	6.78	103	89	91.05	28	4.94	15	9	190	281	1.13	4.2	140	15.39	2.225	3.439	63	0.971	4.8	0.996	2	2	22	89	190	4.2
123943	1	78	1	2	67898.88629	76417.85447	15	35	86	20	26	6.07	105	143	94.59	25	5.55	21	14.5	132	285	1.13	4.6	142	8.55	2.225	3.103	60	0.519	4.7	0.973	2	2	20	143	132	4.6
120180	2	72	1	2	57380.11528	64683.67955	15	42	138	21	26	6.43	105	119	96.36	27	8.88	23	19.2	182	290	0.969	4.5	143	5.13	2.325	4.008	69	2.043	5.5	1.04	0	0	21	119	182	4.5
117092	2	69	1	2	43199.60333	43614.04188	15	47	84	17	28	5	96	116	51.27	26	5.05	33	11.6	166	278	1.162	3.8	139	3.42	2.475	5.198	73	2.495	4.2	0.997	0	0	17	116	166	3.8
115468	1	69	1	2	17596.05999	20161.32015	15	36	67	11	33	6.78	97	153	96.36	27	3.89	22	9.5	136	288	1.162	4.2	144	3.42	2.35	3.465	63	1.614	4.8	1.046	0	0	11	153	136	4.2
110611	2	67	1	2	43003.88705	46374.11735	15	41	102	15	27	5.36	97	40	61	31	5.05	16	12	133	272	1.388	4.4	136	5.13	2.375	5.534	72	1.106	3.5	0.858	2	2	15	40	133	4.4
118458	2	65	1	2	21734.81105	21753.30817	15	41	52	18	24	3.93	104	54	99.01	27	5.27	10	12	133	284	1.227	3.7	143	3.42	2.325	5.637	68	1.084	4.5	0.811	0	0	18	54	133	3.7
115898	1	59	1	2	69014.63658	70255.60971	15	38	71	17	28	7.85	104	193	121.99	27	5.5	54	22.9	167	286	0.969	4.9	142	10.26	2.25	5.844	65	0.565	8.4	1.026	0	0	17	193	167	4.9
113621	2	58	1	2	16675.2342	19967.9647	15	40	126	25	25	3.57	104	99	48.62	33	5.22	61	13.4	211	282	1.227	4	142	6.84	2.3	5.819	73	0.96	2.9	0.736	0	0	25	99	211	4
123362	1	57	1	2	15842.5342	17086.2794	15	40	104	15	20	5.71	102	31	74.26	37	4.72	21	16.1	115	284	1.066	4.5	142	5.13	2.35	5.301	77	1.197	4.6	1.078	0	0	15	31	115	4.5
122036	2	80	4	1	12141.86273	12289.53338	15	38	60	18	28	3.93	105	70	57.46	26	6.61	7	8.6	135	289	1.259	4.2	145	5.13	2.35	4.241	64	0.881	5	0.771	2	2	18	70	135	4.2
123993	1	74	4	1	14438.99735	15178.29874	15	38	101	18	24	6.78	102	96	86.63	35	5.77	23	4.7	174	278	0.84	3.9	138	11.97	2.25	4.577	73	1.05	5.9	0.969	2	2	18	96	174	3.9
119139	2	73	4	1	10827.35013	12256.16554	15	41	52	24	24	7.14	101	236	70.72	24	6.49	9	12.5	245	281	1.098	4.1	139	5.13	2.2	4.526	65	0.813	5.8	0.576	0	0	24	236	245	4.1
109597	2	70	4	1	19749.78588	20793.20343	15	41	95	19	23	6.78	99	64	144.98	25	4.22	19	13.8	163	275	1.227	4.7	137	6.84	2.425	4.267	66	1.219	7.9	1.012	2	2	19	64	163	4.7
112818	2	67	4	1	14159.75857	15503.48715	15	44	63	20	30	4.28	98	110	59.23	33	5.22	10	16.1	169	277	1.388	3.9	139	5.13	2.5	7.551	77	1.524	5	0.878	NA	3	20	110	169	3.9
117315	2	64	4	1	11671.47714	12097.60523	15	48	80	21	25	5.36	107	192	71.6	27	4.66	19	15.4	161	291	1.292	4	146	5.13	2.5	4.06	75	1.298	3.2	0.888	0	0	21	192	161	4
123268	2	63	4	1	16075.96397	17553.58573	15	41	80	17	26	5.71	99	73	53.92	32	5	26	18.6	136	282	1.227	3.8	141	11.97	2.475	4.707	73	1.614	4.8	0.997	2	2	17	73	136	3.8
118864	2	61	4	1	11377.70526	11163.50525	15	39	132	15	23	4.28	105	73	53.92	31	6.99	61	3	140	286	1.001	4.3	143	1.71	2.25	3.905	70	1.784	3.5	1.135	0	0	15	73	140	4.3
121154	2	61	4	1	5676.821197	5924.18749	15	43	82	17	26	6.43	101	158	84.86	35	5	20	8.1	166	285	1.292	4.1	142	5.13	2.4	5.637	78	1.581	5.6	1.093	0	0	17	158	166	4.1
114793	2	61	4	1	15498.39545	16299.20268	15	43	93	22	31	3.21	97	79	53.92	31	5.66	14	18.4	182	282	1.453	4.5	142	13.68	2.4	4.862	74	0.903	4.9	0.846	2	2	22	79	182	4.5
115156	1	61	4	1	12186.8921	13052.1702	15	40	43	18	27	8.21	104	96	91.94	28	5.22	17	18.6	115	287	1.292	3.9	142	8.55	2.4	3.931	68	0.937	6.7	1.047	2	2	18	96	115	3.9
117950	2	59	4	1	7524.459973	7902.851381	15	40	74	21	27	5.36	103	111	71.6	30	5.11	14	13.8	174	287	1.162	4	144	8.55	2.2	4.732	70	0.723	3.6	0.766	2	2	21	111	174	4
120247	1	58	4	1	8312.241822	9490.65323	15	43	64	18	27	5.36	100	146	72.49	25	5.72	16	20.4	161	279	1.195	4.1	139	10.26	2.35	4.06	68	0.881	5.4	0.969	2	2	18	146	161	4.1
114231	2	57	4	1	14675.36916	16053.71728	15	37	71	23	30	4.28	102	92	64.53	37	5.38	9	9.9	192	283	1.356	4.3	142	3.42	2.275	5.922	74	0.802	5.7	1.07	2	2	23	92	192	4.3
123089	2	56	4	1	15413.26255	16303.29247	15	41	84	16	27	5.36	101	63	75.14	38	7.11	13	16.7	130	286	1.259	3.5	142	5.13	2.35	4.991	79	1.502	3.3	0.852	2	2	16	63	130	3.5
123164	1	56	4	1	5245.950178	5705.325565	15	39	73	13	31	5.71	100	127	83.1	23	8.66	24	19.7	108	288	1.162	4.1	142	8.55	2.275	4.526	62	0.847	5.1	1.109	2	2	13	127	108	4.1
112207	2	53	4	1	9639.279353	10112.58893	15	42	81	16	27	7.5	100	140	83.1	29	5.77	18	12.5	171	285	1.615	4.2	141	3.42	2.325	4.112	71	1.355	3.3	1.066	2	2	16	140	171	4.2
124014	2	53	4	1	22926.20161	23134.03125	15	44	92	20	21	5	99	81	66.3	28	4.44	8	14.5	168	277	1.259	3.3	139	8.55	2.3	5.017	72	0.948	4.8	0.831	0	0	20	81	168	3.3
118210	1	53	4	1	5546.861287	6099.41293	15	41	67	17	28	4.28	99	146	86.63	31	5.55	23	14.1	153	276	1.259	4	138	8.55	2.275	4.241	72	1.558	8.2	0.869	0	0	17	146	153	4
114927	2	50	4	1	11689.1426	11665.45602	15	39	66	19	25	5	100	62	64.53	32	5.11	19	21.5	134	276	1.292	4.4	138	3.42	2.325	5.069	71	2.134	3.9	1.219	NA	3	19	62	134	4.4
121569	1	72	3	1	9432.972271	10116.9143	15	40	115	13	28	7.85	99	98	97.24	37	12.43	15	12.7	149	290	1.195	4.5	140	3.42	2.3	3.776	77	0.553	4.3	1.118	0	0	13	98	149	4.5
118061	2	69	3	1	13718.37242	14488.78589	15	34	159	28	23	5.71	105	103	51.27	33	5.77	34	6.4	171	283	1.033	4.3	141	5.13	2.275	4.758	67	1.682	6	1.074	0	0	28	103	171	4.3
109725	2	62	3	1	6934.920473	7640.045399	15	40	110	18	24	5.36	101	115	45.08	28	6.94	14	22.2	141	287	1.324	4.3	143	8.55	2.25	4.344	68	1.456	4	0.764	NA	3	18	115	141	4.3
109634	2	62	3	1	11721.93999	12236.16419	15	41	101	20	23	5.71	104	92	53.04	30	5	11	19.7	134	280	1.098	4.1	140	3.42	2.7	4.758	71	1.321	3.6	0.741	0	0	20	92	134	4.1
115715	1	62	3	1	11116.89178	11894.42832	15	42	74	17	25	5.36	101	149	86.63	28	4.83	33	17.2	156	280	1.066	4.2	140	8.55	2.225	5.198	70	1.129	4.4	1.076	0	0	17	149	156	4.2
116357	2	55	3	1	15234.99362	15546.7035	15	43	95	14	26	4.28	105	74	57.46	26	5.44	14	13.8	160	290	1.098	4.3	146	6.84	2.275	4.836	69	1.321	3.5	0.911	2	2	14	74	160	4.3
117297	2	52	3	1	14008.03478	14318.73049	15	38	89	12	26	4.64	102	45	53.92	32	6.55	23	6.6	147	281	1.195	4	140	3.42	2.25	4.939	70	1.558	2.9	1.016	2	2	12	45	147	4
109850	2	50	3	1	18227.48651	18167.32721	15	41	59	15	27	5.36	101	113	67.18	30	5.27	19	14.1	153	284	1.485	3.8	142	3.42	2.35	4.939	71	0.971	3.5	1.113	2	2	15	113	153	3.8
123521	2	50	3	1	11907.94047	11360.44175	15	34	82	12	22	3.93	109	63	47.74	28	7.22	22	8.1	120	286	1.066	4.8	143	1.71	2.05	3.957	62	1.897	4.5	0.993	0	0	12	63	120	4.8
116061	1	74	2	1	7204.947059	7309.395295	15	42	79	16	30	6.43	103	135	93.7	30	5.72	21	14.3	183	293	1.098	3.4	146	8.55	2.275	5.353	72	1.05	5.2	1.202	2	2	16	135	183	3.4
114863	2	69	2	1	8315.999458	8685.952316	15	36	106	16	28	9.64	101	123	121.11	34	4.77	52	8.8	169	286	1.162	3.6	141	3.42	2.4	5.534	70	1.931	7.5	1.074	1	1	16	123	169	3.6
110700	1	68	2	1	3028.109814	3236.138647	15	40	76	15	22	6.43	102	129	102.54	32	6.83	30	15.2	143	285	0.936	4.1	141	8.55	2.425	4.913	72	1.14	5.3	1.299	2	2	15	129	143	4.1
119870	1	65	2	1	6142.746669	6558.475245	15	37	46	38	21	10.35	98	811	215.7	40	6.44	41	8.1	215	282	1.55	3.6	138	11.97	2.2	3.31	77	1.795	6	1.206	2	2	38	811	215	3.6
121207	1	65	2	1	9491.109173	10003.72654	15	39	121	18	24	3.93	104	124	68.07	28	4.83	17	11.5	108	276	1.13	4.4	139	8.55	2.175	4.526	67	1.253	5.7	0.813	1	1	18	124	108	4.4
119124	2	61	2	1	10620.35565	11312.64161	15	44	86	20	25	6.07	101	158	101.66	32	6.49	28	11.1	173	289	1.292	3.7	144	10.26	2.525	6.206	76	0.711	5.2	1.121	NA	3	20	158	173	3.7
122685	2	61	2	1	6820.223719	7391.669037	15	35	60	18	31	3.93	101	86	54.81	42	4.83	18	15.9	192	282	0.969	4.2	142	5.13	2.4	5.146	77	1.479	4.4	0.793	1	1	18	86	192	4.2
121176	2	60	2	1	6460.264521	6923.993043	15	41	76	20	25	5.71	98	212	92.82	31	3.94	24	17.9	216	275	1.162	3.5	138	6.84	2.25	7.137	72	1.242	5.1	1.199	1	1	20	212	216	3.5
121936	1	60	2	1	12783.55168	13748.09365	15	41	54	19	28	4.28	100	287	69.84	28	6.16	26	14.1	126	278	1.485	4.4	139	6.84	2.475	3.646	69	0.734	4.7	1.053	0	0	19	287	126	4.4
114036	2	56	2	1	8899.590916	9131.304361	15	37	75	14	26	5.71	104	299	93.7	38	4.94	20	12.9	188	286	1.356	4.1	143	1.71	2.425	6.724	75	2.439	5.7	1.096	2	2	14	299	188	4.1
119634	1	56	2	1	6316.075842	6680.370058	15	42	62	15	29	3.93	101	391	92.82	35	4.61	24	21.1	144	278	1.292	3.9	140	8.55	2.5	7.112	77	1.818	6.1	1.146	NA	3	15	391	144	3.9
112692	1	56	2	1	11057.65629	11484.85236	15	40	82	23	31	3.21	104	493	96.36	27	5.66	25	12	203	286	0.969	3.9	144	3.42	2.275	3.879	67	1.039	5.7	1.101	0	0	23	493	203	3.9
117672	2	55	2	1	19930.32047	21120.85762	15	39	89	14	24	3.93	100	75	57.46	38	5.22	49	14	131	275	1.421	4	138	6.84	2.275	4.086	77	1.14	7	0.949	NA	3	14	75	131	4
115314	2	51	2	1	22572.27822	22579.64612	15	39	100	13	26	4.64	100	96	58.34	30	7.55	19	13.1	169	274	1.195	3.8	136	3.42	2.25	3.672	69	4.098	3.2	1.157	2	2	13	96	169	3.8
114886	2	80	1	1	37228.60418	41742.79538	15	44	72	20	26	6.07	100	87	57.46	21	6.27	16	15.4	184	282	1.227	4.3	140	6.84	2.275	7.344	65	1.4	4.4	0.92	1	1	20	87	184	4.3
123069	2	80	1	1	23067.4697	26533.16532	15	39	116	20	32	6.43	100	59	84.86	28	5.05	33	20.2	218	285	1.227	4.9	142	10.26	2.3	5.586	67	1.716	2.7	0.478	2	2	20	59	218	4.9
121323	1	80	1	1	14488.12623	16665.33244	15	40	83	20	26	7.14	99	118	108.73	30	5.38	14	19.3	128	280	1.098	4.8	139	11.97	2.275	5.25	70	2.36	6.3	1.162	2	2	20	118	128	4.8
118564	1	80	1	1	8845.540223	10213.58089	15	37	108	21	26	16.42	100	79	118.46	34	14.65	29	8.2	165	300	1.227	5.6	140	18.81	2.375	4.629	71	3.297	6.6	1.038	0	0	21	79	165	5.6
114826	2	76	1	1	16529.75847	18245.04079	15	41	119	15	27	5.36	102	46	50.39	28	5.55	23	13.3	169	282	1.098	4.1	141	8.55	2.325	4.681	69	2.089	4.4	0.92	0	0	15	46	169	4.1
120319	2	76	1	1	34506.56503	37595.09491	15	40	57	18	27	4.64	101	108	71.6	30	5.11	13	16.1	170	279	1.324	3.9	140	3.42	2.375	6.749	70	1.219	3.9	0.724	2	2	18	108	170	3.9
109587	2	74	1	1	19087.13223	23444.07588	15	40	71	15	25	5.36	103	114	61	28	5.11	45	26.7	148	287	1.421	3.9	144	13.68	2.375	5.275	68	1.964	6.6	1.079	2	2	15	114	148	3.9
112452	2	72	1	1	44206.63765	49713.91998	15	41	67	16	28	6.07	101	48	89.28	25	5.16	14	14.5	159	282	1.098	4.5	141	6.84	2.325	3.931	66	0.779	6.3	1.001	0	0	16	48	159	4.5
117204	2	72	1	1	59480.51458	65069.97264	15	42	85	22	24	7.14	96	71	79.56	25	5.44	13	17.6	140	278	1.001	3.6	138	11.97	2.35	3.931	67	0.813	4.8	0.998	NA	3	22	71	140	3.6
120416	1	72	1	1	154435.2249	162086.6046	15	46	74	20	30	7.14	97	165	82.21	23	6.94	44	19.3	137	282	0.969	3.8	139	10.26	2.475	3.543	69	1.287	6.9	1.046	2	2	20	165	137	3.8
123025	1	72	1	1	17194.32616	19179.45029	15	42	72	19	28	5.36	100	94	122.88	30	5.88	14	12.4	161	279	1.066	3.9	139	5.13	2.4	3.827	72	0.723	5.5	0.987	2	2	19	94	161	3.9
111639	1	71	1	1	74348.02836	78210.54566	15	38	53	16	27	4.64	101	185	109.62	33	5.88	30	15.2	170	278	1.195	4.4	139	10.26	2.3	5.663	71	2.529	6.9	1.097	2	2	16	185	170	4.4
116484	1	71	1	1	3451.7657	3595.751035	15	38	52	19	25	6.43	106	33	105.2	28	4.88	18	19.9	349	290	0.84	4.2	145	18.81	2.275	4.81	66	1.581	5.7	0.918	0	0	19	33	349	4.2
112243	2	69	1	1	49453.4561	50717.20843	15	39	72	20	25	10.71	102	57	94.59	31	4.66	13	17	148	287	0.872	4.2	141	6.84	2.625	4.655	70	2.224	6	0.937	0	0	20	57	148	4.2
123135	2	69	1	1	44740.17128	45547.34795	15	46	90	19	27	5.36	96	110	72.49	25	4.94	27	15.6	159	272	1.453	4.1	136	5.13	2.375	5.172	71	1.468	5.9	0.818	0	0	19	110	159	4.1
121827	2	66	1	1	34356.70623	36316.32939	15	41	109	15	27	6.07	102	96	82.21	30	5.55	22	9.1	129	288	1.388	4.1	144	8.55	2.35	4.913	71	1.479	5.9	1.054	2	2	15	96	129	4.1
115636	1	64	1	1	56770.17102	60382.6877	15	40	47	16	23	4.64	100	92	77.79	35	4.77	23	19.3	151	279	1.162	4.2	140	18.81	2.35	6.258	75	0.914	5.6	1.215	0	0	16	92	151	4.2
110056	1	63	1	1	38817.26057	41705.76251	15	39	70	15	22	5.36	106	99	77.79	25	5.33	23	8.1	131	282	1.259	4.3	141	6.84	2.175	3.905	64	0.565	4.5	0.824	NA	3	15	99	131	4.3
113223	2	60	1	1	159759.3568	162659.4948	15	42	54	26	26	6.78	92	107	66.3	32	4.5	24	18.8	165	275	1.485	3.5	137	10.26	2.525	8.146	74	1.185	6.6	0.996	2	2	26	107	165	3.5
116251	2	60	1	1	57394.3714	62668.9855	15	42	79	18	22	7.14	101	98	82.21	28	4.61	26	13.6	153	279	1.453	4.5	139	1.71	2.25	5.819	70	1.129	5.3	0.704	0	0	18	98	153	4.5
120156	1	60	1	1	14130.8944	13331.80723	15	46	79	17	25	4.64	99	74	97.24	25	4.72	18	29.2	176	271	0.936	3.9	136	29.07	2.375	5.275	71	1.073	4.2	0.988	0	0	17	74	176	3.9
115629	1	60	1	1	27048.82503	29092.20246	15	43	57	22	20	6.07	102	235	84.86	25	5.22	17	31.2	153	286	1.066	4.4	143	13.68	2.275	4.215	68	1.219	5.7	0.887	0	0	22	235	153	4.4
118226	2	59	1	1	76857.73618	76206.0859	15	47	78	20	29	6.07	102	299	69.84	27	5.05	13	14.5	209	277	1.066	3.9	138	6.84	2.375	5.715	74	1.264	3.1	1.043	2	2	20	299	209	3.9
120197	2	58	1	1	60873.74239	66988.11324	15	42	72	15	25	6.78	102	62	68.95	35	5.05	11	10.2	151	281	1.453	4	140	3.42	2.425	6.336	77	1.49	6.4	0.924	2	2	15	62	151	4
110012	2	56	1	1	62624.79396	61399.54641	15	43	35	28	27	8.21	100	307	94.59	29	5.05	9	18.8	179	283	1.162	4	140	6.84	2.4	3.853	72	0.497	4.1	1.261	2	2	28	307	179	4
118775	2	56	1	1	25835.36973	25823.75454	15	41	93	18	24	5.36	102	191	51.27	26	4.83	13	9.9	198	280	1.259	4.4	140	3.42	2.35	4.5	67	0.44	5.7	0.934	2	2	18	191	198	4.4
110130	2	54	1	1	36467.02843	39176.62041	15	45	58	14	26	4.28	103	115	61	28	4.5	13	14.1	150	286	1.098	3.5	144	5.13	2.325	4.758	73	0.994	3.6	0.929	0	0	14	115	150	3.5
124684	2	51	1	1	35630.38871	36940.70719	15	44	63	18	26	3.93	100	141	64.53	28	5.33	19	20.6	127	281	1.13	4.6	141	6.84	2.375	4.862	72	0.926	3.7	1.121	2	2	18	141	127	4.6
112988	1	51	1	1	17065.76947	17683.33147	15	38	145	13	22	3.21	99	61	50.39	37	23.87	65	11.3	143	287	1.098	3.6	135	3.42	2.25	5.275	75	2.269	3.7	0.953	1	1	13	61	143	3.6
123891	2	70	4	2	13412.07697	14539.31534	14	41	97	19	24	5.71	102	61	64.53	34	6.22	12	9.5	161	283	0.936	4.4	141	3.42	2.35	5.275	75	1.287	3.6	0.547	NA	3	19	61	161	4.4
119077	1	53	4	2	50376.36453	55703.68297	14	42	70	13	19	5	103	113	70.72	25	5.27	19	18.8	139	278	1.098	3.7	139	8.55	2.225	6.387	67	0.971	4.7	1.105	0	0	13	113	139	3.7
109577	2	74	4	2	9035.631003	9930.334815	14	35	98	17	24	7.14	102	56	61	38	5.66	17	9.9	178	288	1.162	4.3	143	3.42	2.325	5.198	73	2.19	5.1	1.054	NA	3	17	56	178	4.3
110906	2	66	4	2	7181.072915	7701.83727	14	40	77	18	21	9.28	106	103	88.4	31	8.22	17	9.9	149	289	1.195	4.3	141	3.42	2.55	4.06	71	3.376	6.9	1.089	NA	3	18	103	149	4.3
112195	2	60	4	2	7599.458463	8044.251131	14	36	125	17	25	5.36	99	46	65.42	32	6.61	17	12.9	135	276	1.066	3.9	137	3.42	2.275	5.456	68	1.468	4.9	0.932	0	0	17	46	135	3.9
110300	2	80	3	2	9014.82623	9713.73163	14	40	65	29	25	5.36	94	80	58.34	31	6.11	25	8.1	NA	272	1.033	3.9	135	8.55	2.275	4.293	71	0.903	3.7	0.698	0	0	29	80	164	3.9
123867	2	68	3	2	9008.908605	9722.106227	14	40	103	21	26	5.71	103	168	72.49	27	5	12	15	184	280	1.098	4.2	140	10.26	2.375	4.965	67	1.434	3.3	0.973	2	2	21	168	184	4.2
119427	2	67	3	2	6715.440969	7271.393804	14	36	57	9	26	4.64	98	90	52.16	35	13.27	29	8.2	144	285	0.936	4.1	139	10.26	2.2	4.293	71	1.84	5.2	0.836	0	0	9	90	144	4.1
117643	2	61	3	2	5930.625554	6507.856085	14	43	95	20	23	7.5	102	182	64.53	34	4.72	22	10	NA	282	1.001	4.5	140	5.13	2.2	6.025	77	0.971	4.5	1.189	0	0	20	182	164	4.5
115144	1	56	3	2	10536.39604	10973.49451	14	43	96	15	27	6.78	97	39	120.22	35	5.11	19	13.6	125	283	1.227	4.3	141	6.84	2.5	7.448	78	2.732	4.9	0.954	0	0	15	39	125	4.3
116167	2	52	3	2	9650.174967	10116.89592	14	44	75	12	28	4.28	100	132	55.69	28	7.05	15	10.6	130	283	1.388	4.1	141	3.42	2.4	4.163	72	1.332	4	0.915	0	0	12	132	130	4.1
114539	2	69	2	2	3538.996759	3590.153097	14	34	91	17	27	5.36	104	72	91.94	36	4.88	12	8.1	191	287	1.259	4.1	144	8.55	2.325	3.853	70	0.858	7.3	1.015	1	1	17	72	191	4.1
122043	2	64	2	2	16098.2566	16783.81024	14	37	74	17	28	5.71	109	169	81.33	27	4.94	14	9.9	177	293	1.001	4	147	3.42	2.25	4.319	64	0.926	5.1	0.934	0	0	17	169	177	4
112215	1	63	2	2	3000.127147	3060.424998	14	40	134	18	26	5.71	103	132	66.3	34	5.72	24	6.8	185	288	0.969	4.2	144	8.55	2.375	4.396	74	0.723	4.6	0.949	0	0	18	132	185	4.2
120930	2	62	2	2	9960.519313	10551.75628	14	37	137	14	24	6.07	101	150	67.18	37	5.55	26	14	131	281	1.098	4.2	140	10.26	2.375	5.146	74	0.948	5.8	1.17	2	2	14	150	131	4.2
110251	2	60	2	2	3791.082427	4059.569113	14	46	82	24	26	3.57	101	367	70.72	32	4	19	29.6	191	279	1.324	4.1	141	3.42	2.525	4.112	78	2.823	5.2	1.01	0	0	24	367	191	4.1
119606	1	60	2	2	8658.264558	8961.585232	14	43	57	19	26	3.93	100	168	96.36	28	5.22	18	12.2	122	277	1.388	3.7	139	8.55	2.3	4.681	71	1.039	6.2	1.093	0	0	19	168	122	3.7
121313	2	55	2	2	7418.741047	8412.796051	14	45	83	18	24	4.28	104	150	76.91	29	4.88	22	15.8	185	282	0.936	4.2	142	8.55	2.375	4.681	74	1.039	4.4	1.053	0	0	18	150	185	4.2
112687	2	52	2	2	12014.61906	12982.68593	14	35	102	14	24	5.71	106	131	83.1	43	5.66	25	10.6	180	285	1.098	4.2	142	3.42	2.3	6.077	78	0.869	6.9	1.104	0	0	14	131	180	4.2
123045	2	80	2	2	14394.35031	16173.67411	14	37	74	16	23	8.57	103	89	83.98	35	10.88	22	21	144	285	1.066	4.2	138	5.13	2.5	5.767	72	1.739	8.1	0.729	0	0	16	89	144	4.2
111560	2	72	2	2	8217.103076	8999.784342	14	39	91	18	26	5	99	82	62.76	35	4.61	20	19	156	277	1.066	3.9	139	6.84	2.4	5.25	74	1.558	5.8	1.079	2	2	18	82	156	3.9
124814	1	64	2	2	3686.24081	3866.882086	14	37	116	16	27	3.57	105	160	86.63	29	5.33	43	4.8	152	282	0.904	3.9	142	5.13	2.25	5.715	66	0.96	5.4	1.067	1	1	16	160	152	3.9
116556	2	63	2	2	3517.244078	3681.959984	14	41	86	19	28	4.64	103	355	82.21	26	4.61	12	14.9	174	282	1.098	3.4	142	8.55	2.325	4.422	67	0.587	4.4	0.899	2	2	19	355	174	3.4
112276	2	61	2	2	7744.36	8074.158083	14	40	61	23	27	4.64	101	222	97.24	31	4.72	11	10.4	184	282	1.098	4.2	142	5.13	2.325	7.784	71	0.779	4.5	1.068	0	0	23	222	184	4.2
120391	2	61	2	2	7017.071618	7249.438131	14	38	44	18	24	5.71	103	107	82.21	37	4.33	31	14	147	285	1.259	3.5	143	3.42	2.35	4.965	75	3.014	8.6	1.067	0	0	18	107	147	3.5
123528	2	60	2	2	11632.43482	12386.95261	14	41	154	13	24	3.93	97	66	58.34	29	20.04	28	24.2	191	288	1.098	3.8	137	10.26	2.45	4.732	70	0.948	4	1.015	NA	3	13	66	191	3.8
116605	2	59	2	2	10217.18539	10440.3035	14	40	94	13	26	4.28	99	121	67.18	29	8.33	54	14.9	125	282	1.227	4	140	6.84	2.275	4.526	69	2.077	4.3	0.934	0	0	13	121	125	4
120671	2	57	2	2	6780.395481	7541.430132	14	35	82	24	26	3.93	102	74	75.14	36	4.83	24	9	150	278	1.421	4.1	140	5.13	2.25	3.181	71	0.914	5	1.156	0	0	24	74	150	4.1
119095	1	52	2	2	6023.24663	6236.285414	14	41	45	17	25	6.07	108	170	114.04	27	5.05	30	12.5	NA	290	1.195	3.5	145	8.55	2.25	6.258	68	1.953	7.9	1.071	NA	3	17	170	164	3.5
113600	2	80	1	2	24473.05607	32032.14689	14	41	56	23	24	10.35	105	129	86.63	27	4.83	19	14.7	NA	288	1.388	4.9	142	3.42	2.3	6.568	68	1.75	4.5	1.041	0	0	23	129	164	4.9
115968	2	74	1	2	18780.89337	21750.03259	14	41	79	15	25	6.43	106	58	62.76	25	5.22	12	19.7	154	288	1.259	3.7	144	8.55	2.225	5.301	66	1.016	4.3	0.899	1	1	15	58	154	3.7
121580	2	64	1	2	7178.058669	7308.363153	14	42	76	14	25	12.85	97	53	92.82	31	8.6	17	21.5	170	291	1.55	4.2	140	6.84	2.4	8.741	73	4.008	9	0.991	0	0	14	53	170	4.2
119356	1	64	1	2	126963.7885	133235.9096	14	46	58	17	26	7.14	99	49	97.24	26	5.44	27	14.5	177	280	1.259	4.1	139	8.55	2.3	4.448	72	0.463	6.2	0.591	2	2	17	49	177	4.1
109987	2	59	1	2	52136.54878	56881.22423	14	37	79	26	25	6.43	108	159	88.4	21	7.16	8	12.7	174	302	1.259	4	150	3.42	2.1	3.853	58	1.682	4.9	0.969	2	2	26	159	174	4
114835	2	56	1	2	32076.26154	35691.55175	14	38	68	14	22	6.07	107	104	68.07	28	4.72	11	22.6	156	286	1.227	3.9	143	5.13	2.25	5.405	66	0.734	4.8	1.054	1	1	14	104	156	3.9
116430	1	53	1	2	16027.03728	17046.0817	14	44	65	14	27	6.78	98	91	108.73	33	5.16	13	17.7	132	279	0.969	3.7	139	6.84	2.475	4.991	77	1.355	7	1.07	0	0	14	91	132	3.7
111799	2	80	1	2	54603.1389	62179.11299	14	40	73	23	25	8.57	98	71	91.94	28	6.44	21	15.8	281	279	1.162	4.5	137	6.84	2.4	4.707	68	0.813	5.7	1.088	2	2	23	71	281	4.5
123281	2	80	1	2	39031.04618	47657.73949	14	37	146	18	29	7.85	100	86	167.08	24	5.22	20	15	394	286	1.001	4.4	142	8.55	2.125	6.594	61	2.427	7.9	0.799	2	2	18	86	394	4.4
121844	2	76	1	2	29305.91365	32616.32165	14	43	57	20	22	6.78	100	90	74.26	29	4.61	14	23.1	146	283	1.001	4.1	141	11.97	2.575	6.439	72	1.208	5.4	0.91	0	0	20	90	146	4.1
111245	2	75	1	2	17887.92936	19708.19016	14	41	83	15	32	5	99	66	58.34	27	5.33	16	18.8	144	278	1.13	3.9	139	8.55	2.35	5.741	68	3.624	7.5	0.859	0	0	15	66	144	3.9
114346	2	74	1	2	81507.17861	99060.76103	14	36	62	16	27	5.36	102	45	74.26	32	6.94	21	14.3	189	284	1.098	3.7	141	10.26	2.3	4.319	68	1.242	5.3	1.231	2	2	16	45	189	3.7
113362	1	74	1	2	17780.52037	19134.39514	14	41	105	17	27	6.78	103	53	60.11	26	5.88	44	16.7	121	290	1.033	4	144	5.13	2.375	5.094	67	1.061	5.3	0.87	0	0	17	53	121	4
121965	2	73	1	2	45333.88543	49085.29987	14	43	47	19	25	4.64	95	184	55.69	26	5.16	17	18.4	181	264	0.84	4.6	132	6.84	2.6	5.379	69	1.084	4.1	0.681	1	1	19	184	181	4.6
118142	1	73	1	2	3643.76313	4211.200858	14	39	76	17	18	4.28	105	142	66.3	30	8.44	32	14.3	146	278	0.904	4	138	5.13	2.2	4.06	69	4.053	5.5	0.974	0	0	17	142	146	4
121635	2	72	1	2	51444.74431	61297.70668	14	41	84	14	26	2.5	97	48	68.07	26	5.16	36	14.1	126	270	1.195	4.3	136	3.42	2.325	4.267	67	0.937	3.4	0.64	NA	3	14	48	126	4.3
111741	2	69	1	2	17838.45963	17999.55237	14	44	61	24	24	3.93	98	55	76.02	27	4.77	9	13.3	129	276	1.227	4.3	139	6.84	2.35	6.646	71	1.795	3.7	0.748	0	0	24	55	129	4.3
120667	2	68	1	2	49301.10598	50113.91094	14	40	57	10	28	8.57	102	43	76.91	34	4.44	16	15.2	111	286	1.259	4	142	5.13	2.475	4.81	74	2.281	7.5	1.135	2	2	10	43	111	4
119030	1	67	1	2	11986.71776	12937.97279	14	41	69	24	28	5	101	151	83.98	33	6.05	13	18.8	183	282	1.066	4.4	141	8.55	2.2	4.086	74	0.587	4.6	0.715	NA	3	24	151	183	4.4
122730	1	66	1	2	7406.268393	8532.891104	14	41	85	14	21	7.14	105	199	96.36	31	5.27	13	13.8	147	286	0.904	4.2	142	10.26	2.225	5.767	72	2.303	4.8	1.133	0	0	14	199	147	4.2
122721	2	64	1	2	36514.54479	36545.62002	14	43	77	17	27	2.86	99	73	72.49	27	6.22	17	28.3	165	280	1.324	4.2	141	6.84	2.425	6.232	70	1.31	4.5	0.559	0	0	17	73	165	4.2
109886	1	64	1	2	16136.26686	17310.68593	14	39	83	17	27	5	102	100	76.91	29	6.49	54	13.4	159	288	1.001	4.2	144	10.26	2.225	5.456	68	1.671	5	1.338	NA	3	17	100	159	4.2
116112	2	63	1	2	15889.10952	17629.24714	14	41	56	13	20	7.5	103	56	80.44	27	5.38	16	10.4	174	279	1.292	4.2	138	5.13	2.375	4.138	68	0.689	4.7	0.923	2	2	13	56	174	4.2
123607	2	55	1	2	14565.73275	14120.73599	14	41	113	16	24	3.93	104	102	69.84	29	5.27	11	14.7	175	284	1.195	4.1	143	5.13	2.3	3.853	70	0.542	6.7	0.816	0	0	16	102	175	4.1
122673	2	52	1	2	33492.06771	35143.90057	14	40	72	19	27	6.07	99	62	67.18	28	5.16	12	10.7	144	281	1.033	3.5	140	5.13	2.3	6.103	68	1.795	5.1	1.042	0	0	19	62	144	3.5
115621	2	50	1	2	21361.56985	23954.12895	14	40	39	13	27	4.28	104	53	58.34	26	6.11	19	10.6	182	285	1.033	3.5	143	8.55	2.25	4.629	66	1.694	4.3	0.958	NA	3	13	53	182	3.5
114481	1	50	1	2	13248.42697	13744.27736	14	40	74	14	26	6.43	99	102	76.91	26	6.22	15	7.5	157	280	1.098	3.8	139	10.26	2.375	3.336	66	0.892	4.7	1.381	1	1	14	102	157	3.8
113581	2	75	4	1	24827.00273	27249.23305	14	40	64	15	33	4.28	95	35	49.5	39	15.49	16	20.6	119	287	1.098	4.6	139	6.84	2.25	4.5	79	1.377	3.9	0.848	0	0	15	35	119	4.6
115454	2	73	4	1	13545.16095	14958.8009	14	42	94	23	25	4.64	99	68	66.3	32	5	15	15	176	279	1.324	4.1	140	8.55	2.375	3.957	74	1.14	5.7	0.698	2	2	23	68	176	4.1
115895	1	70	4	1	9566.90769	10358.49354	14	42	58	16	26	6.07	104	164	123.76	28	5.27	16	19.5	143	284	1.066	4.7	142	11.97	2.3	4.448	70	1.445	6.2	1.272	0	0	16	164	143	4.7
122394	2	66	4	1	76438.7461	77798.91446	14	34	92	14	28	4.28	102	49	68.07	29	4.94	20	18.8	157	277	1.162	3.9	139	5.13	2.2	6.31	63	1.366	5.5	0.989	0	0	14	49	157	3.9
114729	2	66	4	1	6173.861508	6320.935303	14	42	108	15	27	5.71	101	77	38.01	32	4.61	14	15.8	137	283	1.259	3.6	142	5.13	2.575	4.965	74	1.106	4.1	0.813	0	0	15	77	137	3.6
115989	1	64	4	1	6517.250998	7235.462892	14	40	114	13	27	2.86	99	35	76.02	32	6	33	20.2	176	278	1.033	4.5	140	18.81	2.375	4.603	72	1.355	5.7	0.84	2	2	13	35	176	4.5
115203	1	60	4	1	121454.8692	127454.8449	14	36	98	16	28	5	101	76	68.07	30	4.5	15	10.9	113	283	1.066	3.7	142	6.84	2.275	1.991	66	1.14	7.4	1.045	NA	3	16	76	113	3.7
119928	2	58	4	1	13572.60763	15433.29321	14	44	57	19	24	5.36	100	109	65.42	29	5	14	11.6	133	282	1.259	4.2	141	5.13	2.3	4.784	73	1.005	2.3	0.86	2	2	19	109	133	4.2
120056	2	57	4	1	7779.601918	8310.995025	14	41	102	13	28	7.14	104	81	50.39	26	5.72	10	16.1	154	293	1.13	4.4	146	10.26	2.3	3.776	67	1.648	4.8	1.019	0	0	13	81	154	4.4
113063	2	57	4	1	37546.82087	40281.69859	14	41	34	19	29	7.14	103	44	57.46	27	5.22	11	13.4	NA	287	1.098	4.6	143	5.13	2.275	6.051	68	0.892	4.7	0.79	2	2	19	44	164	4.6
119123	1	57	4	1	14797.97239	14998.03722	14	41	89	19	26	3.57	99	46	83.1	39	11.55	12	9.7	147	285	0.904	4	140	6.84	2.3	4.06	80	5.103	3.3	0.826	0	0	19	46	147	4
121475	2	55	4	1	27720.98051	28248.99818	14	42	100	13	28	5	96	74	83.98	31	4.94	12	13.6	131	276	1.098	4.1	138	3.42	2.375	6.594	73	2.021	3.4	0.757	0	0	13	74	131	4.1
110498	2	54	4	1	8630.513953	9691.793511	14	39	90	20	28	6.78	105	159	62.76	41	5.16	16	17.7	190	287	1.227	4.2	143	10.26	2.35	5.793	80	0.835	7.5	0.802	NA	3	20	159	190	4.2
121778	2	53	4	1	17398.85846	18061.02952	14	43	55	20	29	6.07	100	277	60.11	32	6.61	13	16.3	223	280	1.356	4.1	139	3.42	2.4	5.612	75	1.208	3.7	0.98	NA	3	20	277	223	4.1
112568	1	53	4	1	10651.56851	11225.58778	14	44	54	16	26	3.93	100	114	67.18	29	5.05	19	14.5	124	277	1.195	4.2	139	10.26	2.3	4.267	73	0.937	5.7	0.964	2	2	16	114	124	4.2
116780	1	52	4	1	20844.22774	21349.30489	14	41	76	12	24	5.71	98	148	77.79	33	5	21	21.9	131	278	1.259	3.6	139	5.13	2.3	8.663	74	2.574	4.2	1.028	NA	3	12	148	131	3.6
118732	2	51	4	1	50350.87865	52133.99	14	39	49	18	27	3.93	101	137	53.92	29	5	10	17.9	136	276	1.001	3.8	139	6.84	2.25	3.982	68	1.264	3.6	1.129	0	0	18	137	136	3.8
124163	2	50	4	1	10404.88124	10871.74358	14	40	92	14	21	2.5	100	56	54.81	31	4.66	35	17.9	106	278	1.227	4.2	141	6.84	2.35	5.663	71	1.806	3.8	1.147	0	0	14	56	106	4.2
110415	1	50	4	1	5498.095814	5320.965756	14	46	72	20	24	3.57	97	123	86.63	27	6.16	16	21.3	164	275	1.001	4.1	138	10.26	2.35	4.008	73	1.411	6.5	0.969	2	2	20	123	164	4.1
111047	2	74	3	1	13597.78041	15321.00139	14	41	74	15	28	5.36	96	55	56.58	34	8.88	11	20.4	128	282	1.324	4.1	139	10.26	2.475	6.051	75	1.434	3.3	0.791	NA	3	15	55	128	4.1
119658	1	70	3	1	24563.49159	25462.74439	14	43	67	17	26	10.71	101	88	137.9	27	7.22	12	9.7	125	291	1.227	4.7	142	3.42	2.45	4.396	70	1.976	8.4	1.272	2	2	17	88	125	4.7
113895	2	69	3	1	8792.919017	9435.903409	14	38	111	22	25	6.43	103	77	58.34	30	5.38	15	18.4	150	283	1.388	4.2	141	15.39	2.325	4.655	68	1.174	4.4	0.934	2	2	22	77	150	4.2
123488	1	66	3	1	5998.588449	6206.398587	14	40	109	19	28	7.85	102	28	97.24	34	5.72	18	16.5	139	289	1.098	4.4	143	20.52	2.375	3.155	74	1.445	5.6	0.957	2	2	19	28	139	4.4
123271	1	63	3	1	6022.271297	6584.014964	14	47	63	15	22	6.43	94	144	91.05	29	5.11	18	19.2	170	277	1.098	3.9	138	5.13	2.35	6.517	76	3.014	6.2	1.085	2	2	15	144	170	3.9
112136	1	61	3	1	13625.15652	14072.50111	14	34	59	14	25	3.57	99	66	54.81	28	5.11	8	16.3	114	273	0.904	3.6	137	8.55	2.05	3.905	62	0.892	4.2	0.973	2	2	14	66	114	3.6
121694	2	76	2	1	11394.19109	12131.62304	14	42	98	20	27	6.78	103	114	90.17	30	5.5	16	13.4	211	285	1.227	3.9	142	6.84	2.45	5.663	72	0.508	5.8	0.985	2	2	20	114	211	3.9
119512	1	71	2	1	10484.49699	11138.31424	14	43	70	20	25	3.21	104	318	83.1	28	6.22	12	12.9	179	283	0.904	3.5	142	5.13	2.225	3.957	71	0.61	3.8	1.385	2	2	20	318	179	3.5
116421	1	69	2	1	5672.424619	5901.461727	14	37	54	21	30	6.43	101	271	139.67	31	4.88	13	6.4	125	281	1.066	3.3	140	5.13	2.25	4.629	68	2.168	7.9	1.198	0	0	21	271	125	3.3
120591	2	67	2	1	10157.58392	10461.42321	14	32	91	32	26	7.5	103	131	60.11	57	4.39	35	7.2	163	283	1.388	4.4	141	5.13	2.275	3.827	89	1.118	5	0.815	1	1	32	131	163	4.4
114663	1	67	2	1	8766.116433	9462.756115	14	38	83	16	26	5	99	173	83.1	28	5.22	23	15	148	276	1.324	3.9	138	8.55	2.325	3.439	66	1.005	4.9	1.042	2	2	16	173	148	3.9
110317	2	64	2	1	10029.0028	10341.06588	14	42	79	18	28	4.28	100	125	61.88	34	4.44	22	10.9	160	278	1.13	3.9	140	5.13	2.425	6.801	76	0.824	4.8	0.851	1	1	18	125	160	3.9
110726	1	62	2	1	4884.918751	5107.228342	14	36	52	18	24	3.93	104	153	91.94	25	5.88	11	13.4	129	277	0.904	3.9	139	5.13	2.2	2.87	61	1.468	5.8	1.195	2	2	18	153	129	3.9
110508	2	61	2	1	11295.55476	11997.60322	14	39	60	17	24	5.71	100	105	79.56	32	4.66	19	15.2	142	282	1.292	3.9	141	8.55	2.5	6.698	71	1.039	4.4	0.814	1	1	17	105	142	3.9
110852	1	61	2	1	3192.469371	3307.47026	14	40	68	17	22	4.64	101	230	114.04	35	7.44	38	12	145	280	1.001	3.8	139	8.55	2.375	5.275	75	1.152	8.7	1.187	NA	3	17	230	145	3.8
111770	2	60	2	1	14970.97606	15821.17411	14	41	62	22	26	4.28	99	121	77.79	36	5.55	27	23.1	165	274	1.162	4	137	11.97	2.4	5.663	77	0.598	5.4	0.885	0	0	22	121	165	4
114916	2	56	2	1	7441.979817	8277.270993	14	39	89	17	25	6.43	106	137	75.14	33	5.27	24	11.3	142	289	1.292	4	144	5.13	2.225	4.836	72	0.802	5.2	0.925	NA	3	17	137	142	4
124394	2	50	2	1	7031.61391	7356.421948	14	42	47	21	23	5	104	387	74.26	34	5	11	7.7	215	283	1.13	3.3	142	5.13	2.175	6.025	76	0.723	4.3	1.31	0	0	21	387	215	3.3
116580	2	80	1	1	8880.704821	9545.39672	14	40	65	21	26	6.43	98	55	74.26	26	5	16	9.1	156	275	1.421	4.2	137	3.42	2.325	6.594	66	1.298	4.3	1.091	2	2	21	55	156	4.2
117354	2	80	1	1	12564.6484	13075.60927	14	35	109	22	25	5.71	100	41	62.76	29	6.49	29	18.6	155	276	0.936	3.5	137	8.55	2.4	4.81	64	0.948	4.5	1.033	0	0	22	41	155	3.5
119219	2	80	1	1	18365.92689	20978.83325	14	43	52	24	25	4.28	95	71	66.3	25	4.5	13	21.3	179	269	1.356	4.1	135	15.39	2.325	5.586	68	1.197	2.6	0.953	2	2	24	71	179	4.1
110006	2	80	1	1	23127.55837	26811.18047	14	38	42	20	29	6.07	103	49	85.75	22	6.16	13	2.9	163	285	1.324	4.3	142	6.84	2.2	5.224	60	1.614	5.6	0.782	0	0	20	49	163	4.3
117793	2	80	1	1	13773.17373	14059.17279	14	40	75	17	23	6.78	100	76	116.69	27	4.83	14	13.6	218	274	1.066	3.8	136	8.55	2.55	6.465	67	1.547	3.9	0.782	0	0	17	76	218	3.8
109901	1	80	1	1	11998.10604	14801.76745	14	37	62	25	26	10	97	108	78.68	40	5.55	48	9.9	167	279	1.13	4	137	18.81	2.225	4.396	77	0.734	9.5	1.229	0	0	25	108	167	4
116461	1	80	1	1	26855.97828	32356.80055	14	41	44	19	26	9.28	106	98	118.46	28	6	16	12	154	290	1.162	4.6	143	8.55	2.425	4.112	69	1.321	4.5	1.001	2	2	19	98	154	4.6
121072	1	80	1	1	9789.182995	12029.86495	14	44	43	16	28	6.07	102	73	83.98	27	5.11	11	11.8	136	284	1.227	4	142	10.26	2.25	4.37	71	0.903	5	0.9	NA	3	16	73	136	4
113129	1	79	1	1	6534.8011	7155.67954	14	39	51	19	27	6.07	101	88	87.52	31	5.11	21	16.7	156	284	0.969	4.6	142	10.26	2.35	4.37	70	0.914	4.8	0.979	0	0	19	88	156	4.6
111783	2	78	1	1	21290.7983	24541.94669	14	42	89	19	30	7.14	99	142	84.86	29	2.66	22	22.2	162	281	0.936	3.2	141	6.84	2.5	4.707	71	1.502	7	1.313	0	0	19	142	162	3.2
110625	2	78	1	1	44909.78765	48829.95323	14	40	106	15	29	7.85	100	61	114.04	31	5.27	30	15.6	188	284	0.936	4.3	141	5.13	2.425	6.465	71	1.581	7.5	1.074	2	2	15	61	188	4.3
115843	2	76	1	1	35245.70185	38633.72944	14	39	96	16	26	6.07	101	56	84.86	29	5.55	15	14.7	149	283	1.066	4.3	141	6.84	2.225	5.379	68	2.597	6.2	0.893	2	2	16	56	149	4.3
121699	2	71	1	1	88900.63351	102562.5222	14	36	94	15	24	5	104	166	77.79	27	4.72	33	18.1	162	288	0.969	4	145	5.13	2.15	6	63	1.694	6.8	1.125	2	2	15	166	162	4
113799	1	71	1	1	51152.9928	54848.05401	14	43	77	20	26	6.43	99	153	105.2	30	5.16	14	30.8	154	281	1.001	4.3	140	10.26	2.325	5.508	73	1.276	5.1	0.962	2	2	20	153	154	4.3
110709	1	70	1	1	24526.57214	25316.09468	14	41	66	26	28	6.07	103	142	71.6	27	4.61	21	12.5	214	284	0.904	4.7	142	15.39	2.3	3.776	68	0.553	4.2	1.12	NA	3	26	142	214	4.7
117807	2	67	1	1	53593.42292	57121.98695	14	39	78	15	25	6.43	104	65	81.33	25	5.44	14	14.3	144	287	1.001	4.1	143	6.84	2.3	4.758	64	2.326	5.8	0.873	2	2	15	65	144	4.1
115711	2	66	1	1	49780.95859	49950.9604	14	43	102	21	24	7.14	99	104	77.79	30	5.27	12	9.3	213	278	1.356	4.2	138	11.97	2.3	4.81	73	1.208	4.6	0.981	1	1	21	104	213	4.2
121473	1	66	1	1	113073.0369	130053.1228	14	39	70	17	28	4.64	104	75	92.82	28	5.22	15	17.4	121	289	0.872	5.1	145	11.97	2.225	4.163	67	1.197	5.1	1.128	2	2	17	75	121	5.1
111908	2	64	1	1	15007.50784	14724.97209	14	40	49	18	25	3.93	101	68	57.46	27	4.61	10	11.8	142	280	1.388	3.9	141	3.42	2.3	5.663	67	1.14	3.9	0.994	0	0	18	68	142	3.9
113856	2	63	1	1	18226.8124	20616.31257	14	34	109	13	24	13.21	101	28	129.95	31	8.6	15	14.3	191	297	1.227	4.7	143	5.13	2.125	4.112	65	2.71	11.1	0.95	1	1	13	28	191	4.7
113467	2	63	1	1	85626.5668	86669.49232	14	38	66	20	23	6.07	102	46	84.86	31	5.11	6	11.8	138	275	1.453	4.1	137	1.71	2.2	4.681	69	1.039	3.7	0.912	2	2	20	46	138	4.1
124735	1	63	1	1	61174.89618	64166.92626	14	37	57	19	21	7.14	105	121	132.6	27	3.44	17	23.6	152	278	1.13	4.1	139	6.84	2.3	4.422	64	1.456	6.3	0.936	2	2	19	121	152	4.1
120379	2	62	1	1	85273.62953	84876.54813	14	41	91	18	26	7.14	101	117	72.49	31	5.16	12	12	180	282	1.001	3.8	140	5.13	2.425	5.25	72	0.835	3.6	0.842	2	2	18	117	180	3.8
121669	2	61	1	1	117528.369	119690.6362	14	43	81	18	22	5.71	101	138	73.37	25	4.61	14	22.4	150	274	1.292	4.2	137	8.55	2.35	5.198	68	0.79	3.6	0.733	2	2	18	138	150	4.2
113751	1	61	1	1	134468.3948	139418.0957	14	40	70	17	27	6.78	100	133	74.26	32	7.11	24	17	128	285	1.033	4.7	141	13.68	2.375	6.181	72	2.01	5.8	1.279	2	2	17	133	128	4.7
117243	2	59	1	1	3027.235067	3138.562566	14	43	73	18	27	5.71	101	74	73.37	24	4.55	9	15.9	177	283	1.162	4.1	142	5.13	2.3	6.543	67	0.677	3.2	1.029	2	2	18	74	177	4.1
112345	1	58	1	1	40769.98114	42161.15555	14	37	109	18	28	4.28	104	117	83.98	33	4.44	17	17.9	150	284	1.227	3.9	143	3.42	2.175	4.319	70	1.152	4.2	0.835	0	0	18	117	150	3.9
123215	1	57	1	1	61012.75019	65464.196	14	44	98	19	26	5.71	101	145	87.52	22	5.11	20	16.8	125	284	1.001	4.1	142	8.55	2.25	4.06	66	1.614	6.9	1.087	2	2	19	145	125	4.1
111751	2	55	1	1	155746.4451	167096.907	14	37	84	15	29	5	98	66	63.65	36	4.94	23	9	139	276	1.066	4.3	138	10.26	2.275	5.094	73	0.948	5.2	1.016	2	2	15	66	139	4.3
120965	2	55	1	1	23464.86798	26149.18018	14	41	70	17	27	7.14	102	70	66.3	25	4.39	7	18.8	133	290	1.292	3.8	145	22.23	2.3	4.758	66	1.005	4.3	0.881	2	2	17	70	133	3.8
113615	2	54	1	1	88659.58832	94476.24012	14	40	66	15	26	5	102	131	71.6	30	4.5	17	14.1	179	279	1.098	4	140	6.84	2.275	4.991	70	0.813	3.4	1.086	NA	3	15	131	179	4
111459	1	54	1	1	36571.20037	40601.58139	14	43	66	16	23	6.43	100	76	103.43	34	5	98	11.8	143	281	1.066	3.9	140	10.26	2.225	6.129	77	2.303	11.8	0.984	0	0	16	76	143	3.9
119631	2	51	1	1	65548.01119	66258.69932	14	37	93	18	23	3.21	101	69	63.65	36	4.94	49	4.8	127	272	1.001	4	137	3.42	2.125	5.974	73	1.694	4.4	0.872	2	2	18	69	127	4
119232	1	51	1	1	50949.61791	56898.38573	14	42	65	19	26	6.43	101	120	99.89	24	4.44	18	21.9	147	280	1.001	4.3	140	8.55	2.175	4.577	66	0.598	5.1	1.045	2	2	19	120	147	4.3
121964	2	73	4	2	20786.59988	23549.66774	13	45	59	19	28	6.78	100	102	72.49	28	4.66	12	28.5	184	285	1.13	3.7	142	10.26	2.5	4.707	73	0.802	4.9	0.903	0	0	19	102	184	3.7
113355	2	67	4	2	4133.116922	4408.38358	13	39	119	13	24	8.93	105	68	88.4	32	6.49	11	13.4	167	292	0.872	4.4	144	8.55	2.35	6.387	71	1.874	5.3	1.33	0	0	13	68	167	4.4
113548	2	80	4	2	7071.593193	7331.032279	13	42	79	24	25	7.5	103	158	85.75	35	5.5	11	13.3	204	286	1.195	4.1	142	8.55	2.35	5.612	77	2.439	6.9	0.939	0	0	24	158	204	4.1
121065	2	74	4	2	5568.457327	6125.335907	13	41	155	21	24	8.21	105	171	76.91	31	5.5	46	12.9	260	289	0.969	3.8	143	8.55	2.4	3.233	72	1.027	7.8	0.934	0	0	21	171	260	3.8
117494	2	71	4	2	9321.494748	10123.57752	13	38	66	17	26	5.71	104	49	76.91	34	5.72	28	19.7	150	285	1.227	4.1	142	3.42	2.425	4.888	72	2.416	6.3	0.877	2	2	17	49	150	4.1
121767	2	68	4	2	15040.74354	16285.92521	13	35	117	15	22	11.42	107	24	112.27	33	5.11	24	11.8	155	292	1.227	4.9	143	5.13	2.25	3.31	68	1.264	6.2	1.314	0	0	15	24	155	4.9
123583	1	67	4	2	20509.90805	22678.01548	13	40	96	18	25	7.14	101	96	79.56	30	6.61	21	17.4	164	281	0.84	4.5	139	10.26	2.3	4.965	70	2.664	5.8	1.054	0	0	18	96	164	4.5
117622	2	56	4	2	7408.328006	8226.12796	13	45	57	15	24	5.36	102	95	45.97	27	5.27	16	14.7	NA	284	1.388	4	142	8.55	2.3	7.267	72	0.982	3	0.82	0	0	15	95	164	4
111704	2	52	4	2	17850.3543	20114.84825	13	35	78	22	25	4.28	101	64	42.43	30	9.33	15	8.2	NA	283	1.615	4.6	140	3.42	2.25	6.258	65	1.705	4.2	0.926	0	0	22	64	164	4.6
121831	2	77	3	2	6538.585961	7072.89014	13	43	59	19	27	4.28	98	75	39.78	25	5.27	19	19.2	178	281	1.292	3.7	141	18.81	2.4	4.965	68	1.671	5.2	0.965	1	1	19	75	178	3.7
116888	2	51	3	2	19183.42079	21599.80506	13	45	85	17	25	3.93	104	100	51.27	27	4.72	10	10.7	160	284	1.356	3.9	143	3.42	2.4	4.448	72	0.677	5.1	0.684	0	0	17	100	160	3.9
113320	2	65	2	2	9087.062059	9700.372545	13	42	70	19	28	4.28	101	80	60.11	35	4.55	28	13.3	169	282	1.033	4	142	3.42	2.425	5.069	77	1.581	4.8	0.879	1	1	19	80	169	4
121157	2	63	2	2	10926.26066	11185.64654	13	43	107	NA	27	4.28	99	NA	59.23	37	4.5	12	15	NA	274	1.13	NA	138	6.84	2.4	6.025	80	0.621	4	1.014	2	2	22	150	164	4.1
122678	2	61	2	2	4835.628205	5050.75021	13	44	87	18	24	5.71	103	79	91.94	36	5.22	61	11.5	147	284	1.066	4.2	142	6.84	2.45	6.465	80	2.314	6.6	1.198	0	0	18	79	147	4.2
114843	2	54	2	2	10641.70199	11499.14733	13	37	82	18	24	3.57	103	111	58.34	42	4.72	17	13.6	190	272	1.13	3.6	137	8.55	2.25	5.431	79	1.321	5.4	0.955	NA	3	18	111	190	3.6
121117	1	50	2	2	5938.35412	6153.109143	13	41	69	20	23	5	105	203	91.94	33	5.33	23	7.9	150	283	1.001	4.5	142	5.13	2.175	3.905	74	0.508	4.2	1.036	2	2	20	203	150	4.5
112995	2	80	2	2	6337.430995	7018.074207	13	36	96	21	28	17.85	105	290	164.42	37	6.22	14	12.5	181	299	1.195	4	143	6.84	2.25	4.034	73	0.824	8.2	1.373	0	0	21	290	181	4
114842	2	80	2	2	15358.14365	17076.97714	13	39	93	23	32	6.78	103	97	72.49	37	5.22	12	9.1	188	291	1.13	4	145	5.13	2.325	4.008	76	0.723	4.4	0.921	0	0	23	97	188	4
110703	1	78	2	2	5200.056534	5267.945929	13	42	70	22	25	7.14	105	353	195.36	41	6.27	16	9.5	159	288	0.84	4.2	143	6.84	2.075	3.75	83	1.039	5.7	1.522	0	0	22	353	159	4.2
117957	2	76	2	2	7758.416562	8310.254602	13	39	65	17	20	22.85	103	449	292.6	38	5.16	25	21.3	170	294	1.615	6.6	138	3.42	2.2	3.362	77	0.734	8.7	1.093	0	0	17	449	170	6.6
110889	2	71	2	2	9504.47117	10730.46448	13	41	98	13	24	5	100	85	44.2	38	6.55	16	17.4	157	287	1.227	4	143	6.84	2.55	4.267	79	1.129	3.6	0.886	0	0	13	85	157	4
113871	1	71	2	2	10628.67658	11187.92118	13	37	54	19	29	6.43	101	200	109.62	27	4.72	10	14.5	167	279	0.969	4.7	139	8.55	2.2	4.862	64	0.824	4.9	1.012	0	0	19	200	167	4.7
122574	2	70	2	2	23239.3852	25868.92037	13	46	85	22	27	3.57	97	239	62.76	39	5	18	12.9	218	272	1.227	3.8	137	6.84	2.375	6.103	85	0.734	4.2	0.611	1	1	22	239	218	3.8
122237	2	68	2	2	14114.84887	14870.19762	13	40	123	23	19	5	105	54	173.26	31	5.22	51	15.6	201	281	1.13	4.2	141	13.68	2.325	5.017	71	1.558	8.8	0.912	2	2	23	54	201	4.2
110410	2	65	2	2	4723.979168	5074.493528	13	37	87	15	30	3.93	93	71	72.49	36	13.38	25	13.8	175	283	1.292	3.7	138	5.13	2.4	3.569	73	2.427	5.9	1.293	0	0	15	71	175	3.7
120739	2	63	2	2	4870.168406	5086.826997	13	41	64	15	23	3.93	106	249	74.26	32	5.22	28	20.2	176	284	1.066	3.8	143	11.97	2.325	4.888	73	1.445	6.5	1.035	1	1	15	249	176	3.8
115644	2	63	2	2	9083.648642	9487.751816	13	38	51	12	24	5.71	100	197	39.78	31	6.55	30	18.4	138	276	0.775	4.7	137	3.42	2.525	3.388	69	1.558	5.4	0.972	0	0	12	197	138	4.7
121173	2	63	2	2	5513.083889	5629.339407	13	38	121	10	25	4.64	99	332	74.26	30	11.05	19	9.1	160	280	0.904	3.7	137	3.42	2.25	5.741	68	1.694	5.5	0.936	0	0	10	332	160	3.7
116600	1	62	2	2	2974.492027	3063.33007	13	37	87	16	28	3.57	104	238	85.75	29	4.88	15	16.5	133	283	1.162	4.5	143	8.55	2.3	4.37	66	0.745	4.9	0.882	NA	3	16	238	133	4.5
118435	2	61	2	2	14970.97606	15821.17411	13	40	73	15	30	6.78	98	42	61.88	34	5.88	24	14.3	137	282	1.195	3.6	140	15.39	2.375	5.612	74	0.779	4.9	1.085	NA	3	15	42	137	3.6
111874	1	61	2	2	4160.356577	4441.921032	13	38	89	21	26	5	101	142	116.69	40	4.66	17	15.4	145	281	1.066	4.3	141	3.42	2.3	2.534	78	0.7	6.9	1.08	0	0	21	142	145	4.3
123190	2	60	2	2	7736.905263	7977.647292	13	38	73	13	28	6.07	96	57	66.3	37	5.72	37	12.7	119	281	1.259	3.7	140	3.42	2.75	5.198	75	2.958	8.7	1.487	1	1	13	57	119	3.7
118240	2	60	2	2	4369.641127	4652.748736	13	29	98	14	30	10	105	87	107.85	38	3.16	43	8.6	189	292	1.324	4.1	145	3.42	2.2	4.474	67	0.655	6.2	1.304	NA	3	14	87	189	4.1
115100	1	60	2	2	8760.631502	9233.930102	13	38	58	16	28	7.14	102	532	96.36	35	5.38	20	3.8	168	284	0.969	4.6	141	3.42	2.2	5.069	73	1.016	4.3	1.219	1	1	16	532	168	4.6
110765	2	59	2	2	10520.46886	10898.44776	13	40	85	17	25	3.93	104	83	50.39	35	5.5	35	13.1	196	286	1.066	4.2	144	5.13	2.35	6.749	75	1.208	4.2	1.072	NA	3	17	83	196	4.2
117374	2	57	2	2	8302.383268	9306.85046	13	40	55	18	24	7.85	101	148	110.5	34	5.94	53	14	172	279	1.13	4.5	138	3.42	2.375	3.827	74	0.463	2.6	0.837	NA	3	18	148	172	4.5
111335	2	55	2	2	15228.97186	17033.09595	13	37	79	18	25	3.57	101	127	68.07	34	4.39	10	13.1	197	279	1.066	4.1	141	10.26	2.35	6.103	71	1.152	5.7	1.121	0	0	18	127	197	4.1
121561	1	72	1	2	23288.08654	27814.63363	13	42	83	17	25	4.64	102	93	91.05	27	5.72	11	18.8	163	282	0.936	4.2	141	8.55	2.35	4.526	69	0.914	3.6	0.878	0	0	17	93	163	4.2
120022	1	56	1	2	16488.68959	17423.88464	13	40	54	16	29	7.14	103	166	83.1	30	5.44	16	20.4	176	288	0.969	4.3	143	8.55	2.25	4.991	70	1.242	6.4	0.913	2	2	16	166	176	4.3
121272	2	80	1	2	7209.790548	7958.306896	13	39	69	19	27	7.5	103	188	64.53	24	5.83	14	17	222	288	1.227	4.4	143	10.26	2.25	4.241	63	1.185	4.3	1.599	2	2	19	188	222	4.4
123327	2	80	1	2	16896.17614	21024.86687	13	41	99	17	20	12.85	100	72	91.05	39	5.66	23	11.3	185	282	1.227	4.1	137	5.13	2.325	7.086	80	1.276	7	1.356	0	0	17	72	185	4.1
124426	2	80	1	2	18246.43856	21262.14222	13	42	83	19	24	9.28	97	67	72.49	27	6.22	19	21.3	171	285	1.13	3.6	140	10.26	2.35	5.301	69	0.971	6.1	1.118	NA	3	19	67	171	3.6
115358	2	80	1	2	26911.65959	31072.65735	13	44	74	20	18	10	106	115	78.68	24	5.72	19	12.9	171	289	0.936	4.2	142	10.26	2.55	4.008	68	1.152	4.6	1	0	0	20	115	171	4.2
114384	2	80	1	2	11107.86241	12573.76872	13	38	98	20	25	7.85	102	59	90.17	33	6.77	21	25.3	172	284	1.033	4.3	140	8.55	2.325	5.017	71	1.49	7.1	0.915	1	1	20	59	172	4.3
112138	2	80	1	2	13955.6795	18228.29336	13	38	81	23	26	5.71	101	87	64.53	29	5	29	11.5	164	278	1.195	3.9	139	6.84	2.3	5.689	67	0.937	3.4	0.714	0	0	23	87	164	3.9
110936	1	80	1	2	20644.89649	25217.39908	13	38	82	17	27	3.21	99	52	71.6	31	5.77	29	23.5	130	282	1.259	4.6	142	13.68	2.275	4.396	69	0.881	7	1.345	2	2	17	52	130	4.6
121720	2	79	1	2	24726.90748	29194.76498	13	43	58	20	26	3.93	98	72	64.53	24	5.5	14	20.1	177	277	1.227	4.1	139	15.39	2.35	6.801	67	0.711	4.1	0.822	2	2	20	72	177	4.1
109544	2	76	1	2	28086.05346	42110.53913	13	36	78	17	25	11.07	107	59	110.5	34	6.22	16	9.5	183	300	1.324	5	147	6.84	2.3	4.034	70	1.863	5.9	1.038	0	0	17	59	183	5
115007	2	72	1	2	17763.12777	19194.83568	13	37	110	17	24	3.21	105	81	52.16	33	6.22	28	15.9	154	286	1.162	4.4	144	5.13	2.225	5.094	70	1.987	5.4	0.885	2	2	17	81	154	4.4
115225	2	70	1	2	18941.72321	22316.63035	13	41	74	17	25	5.71	101	60	69.84	30	5.27	33	16.8	195	279	1.195	3.9	139	6.84	2.45	6.413	71	1.885	5.4	0.878	0	0	17	60	195	3.9
114532	2	68	1	2	8581.386672	9302.418123	13	34	163	23	27	3.93	101	101	63.65	29	15.65	53	7.9	206	283	0.872	4.5	137	18.81	2.35	3.155	63	0.835	4.6	0.942	0	0	23	101	206	4.5
115882	2	66	1	2	53474.80314	56608.16087	13	39	73	17	26	7.14	104	75	87.52	28	5.22	20	16.7	218	285	1.098	4.1	142	6.84	2.3	5.637	67	1.49	6	0.834	2	2	17	75	218	4.1
113691	2	63	1	2	25105.95393	24860.61355	13	42	111	15	26	4.64	103	59	65.42	25	5.66	18	18.6	135	282	1.162	4.3	141	3.42	2.525	6	67	2.021	5.2	0.979	0	0	15	59	135	4.3
110023	2	62	1	2	35692.50071	38999.17616	13	43	49	19	27	6.43	96	96	60.11	27	4.88	9	15.6	155	279	1.227	4.2	139	5.13	2.375	5.948	70	0.914	4.8	0.974	0	0	19	96	155	4.2
111604	2	62	1	2	17492.00252	17506.88886	13	37	118	12	28	5.36	99	37	56.58	28	8.38	36	15.6	157	291	1.13	4.4	144	5.13	2.25	4.732	65	1.389	6	0.855	1	1	12	37	157	4.4
121728	1	62	1	2	18226.14428	18779.57654	13	34	82	13	26	6.78	102	58	122.88	31	5.11	29	19.3	111	283	1.195	4.3	141	3.42	2.25	3.207	65	2.111	5.4	0.914	0	0	13	58	111	4.3
119883	2	61	1	2	15947.45662	16230.82678	13	34	85	16	29	6.78	98	41	68.95	39	8.55	39	20.8	123	285	1.356	4.4	140	10.26	2.25	5.508	73	2.427	7.5	1.12	0	0	16	41	123	4.4
111332	2	57	1	2	29026.46877	29545.73874	13	40	47	20	28	5.36	102	88	62.76	22	4.66	16	27.9	144	285	1.259	4.1	143	11.97	2.275	4.707	62	1.039	4.4	0.912	0	0	20	88	144	4.1
123871	2	55	1	2	13764.2405	14844.25863	13	39	105	16	28	6.43	100	89	82.21	27	5.22	36	10.7	172	285	1.033	3.9	142	3.42	2.3	7.086	66	2.393	6.4	1.218	0	0	16	89	172	3.9
110806	2	53	1	2	39660.28525	44283.27573	13	41	118	14	29	2.86	97	49	43.32	29	5.94	22	6.4	124	278	1.292	3.7	140	3.42	2.275	6.775	70	3.974	4.8	0.591	0	0	14	49	124	3.7
119890	2	51	1	2	93877.93474	96574.14135	13	37	61	15	29	4.64	98	92	61	31	5.61	12	17.9	NA	280	1.066	3.8	140	5.13	2.375	3.569	68	2.247	5	1.175	2	2	15	92	164	3.8
117784	1	80	4	1	22785.82994	23348.88348	13	41	96	21	25	8.21	102	254	100.78	31	5.72	17	7	177	289	0.775	4.3	143	6.84	2.45	3.181	72	1.185	6.7	1.188	0	0	21	254	177	4.3
118623	1	80	4	1	11137.63322	11722.94166	13	44	128	19	27	5	101	98	95.47	21	5.16	60	24.7	187	278	0.936	4.3	139	22.23	2.35	4.551	65	1.897	5	0.931	0	0	19	98	187	4.3
121359	2	76	4	1	13078.15055	14603.73715	13	36	72	18	28	8.21	102	208	116.69	34	6.72	31	13.3	127	286	1.388	4.6	141	8.55	2.3	5.301	70	2.371	6.9	0.973	0	0	18	208	127	4.6
117546	1	75	4	1	53408.05256	56626.3095	13	40	60	19	24	7.14	106	320	127.3	28	7.38	15	21	168	288	0.743	4.5	142	22.23	2.325	5.094	68	0.711	5.7	1.181	0	0	19	320	168	4.5
119391	1	74	4	1	12393.10982	13053.48466	13	40	108	17	26	5.71	101	187	106.08	27	4.88	18	9.9	179	278	1.162	4.1	139	6.84	2.375	4.008	67	1.784	6	1.019	0	0	17	187	179	4.1
116404	2	70	4	1	15090.00069	16872.26174	13	39	121	24	22	5.36	105	108	52.16	35	5.33	11	16.7	147	284	1.13	4	142	6.84	2.25	4.138	74	0.768	4.5	0.843	NA	3	24	108	147	4
110153	1	70	4	1	7880.414648	8381.393729	13	41	41	20	27	7.14	100	61	98.12	33	4.55	16	19.9	140	279	1.13	4.5	139	8.55	2.3	4.81	74	0.881	4.2	0.992	2	2	20	61	140	4.5
117917	2	68	4	1	11385.58171	12000.89514	13	35	101	14	27	2.5	101	85	53.04	35	10.71	17	14.5	173	284	1.227	4.3	141	8.55	2.325	5.508	70	1.084	4.1	1.003	0	0	14	85	173	4.3
113324	1	66	4	1	10516.6497	11139.40791	13	41	56	12	25	5.71	103	74	96.36	28	4.44	21	11.1	133	281	1.001	4	141	5.13	2.225	4.991	69	4.053	6.4	1.001	2	2	12	74	133	4
111956	1	65	4	1	15037.16546	15294.52248	13	41	66	18	26	5.36	99	84	77.79	30	5.61	17	29	122	273	1.421	4.3	136	6.84	2.375	4.577	71	2.213	4.3	1.014	0	0	18	84	122	4.3
112193	1	65	4	1	6631.373804	7120.434561	13	40	100	10	31	8.21	99	54	92.82	32	11.32	16	15.9	99	291	1.195	4.6	141	5.13	2.425	3.801	72	2.043	4.1	0.89	0	0	10	54	99	4.6
119669	2	64	4	1	6095.86257	6711.685173	13	39	64	20	23	6.07	101	128	88.4	25	5	6	19.9	168	286	1.292	4.2	143	8.55	2.325	6.646	64	0.96	4.6	0.911	0	0	20	128	168	4.2
124335	2	64	4	1	14064.56437	15585.81105	13	42	69	19	25	4.64	99	62	56.58	31	5.27	9	18.8	138	276	1.356	4	138	5.13	2.4	5.25	73	1.005	3.6	0.651	0	0	19	62	138	4
114130	2	63	4	1	12501.81482	13546.85295	13	44	75	18	30	5.36	98	86	74.26	28	4.88	21	12	139	282	1.13	3.7	141	6.84	2.45	4.448	72	1.852	6.9	0.705	2	2	18	86	139	3.7
119223	1	63	4	1	8263.353848	8615.22255	13	43	57	20	23	5.36	99	198	79.56	31	3.22	47	16.3	117	274	1.001	3.8	138	6.84	2.35	4.862	74	1.919	5.6	0.968	2	2	20	198	117	3.8
110290	1	63	4	1	6321.796172	6648.313458	13	41	77	19	23	4.64	103	85	86.63	33	4.88	23	15.2	138	281	1.066	4.4	141	15.39	2.375	5.767	74	1.05	6	0.905	0	0	19	85	138	4.4
116572	1	63	4	1	7608.048063	8128.949143	13	39	52	20	28	6.43	104	76	96.36	40	4.88	15	8.1	154	286	1.066	4.5	143	5.13	2.35	4.939	79	0.689	7.4	0.724	0	0	20	76	154	4.5
121791	2	60	4	1	6860.280602	7201.353443	13	39	73	19	26	5	98	61	46.85	35	5.44	19	26	118	280	1.259	3.6	140	13.68	2.5	7.861	74	1.332	4.6	0.822	0	0	19	61	118	3.6
120026	2	60	4	1	11808.23842	12800.99288	13	42	75	18	27	4.28	103	70	50.39	29	5.33	14	17.6	152	285	1.259	3.8	143	8.55	2.325	7.215	71	1.637	4.9	0.683	2	2	18	70	152	3.8
116455	2	56	4	1	7687.851192	9055.880553	13	43	44	30	25	4.64	103	68	57.46	35	4.88	20	17.7	186	285	1.001	3.8	143	6.84	2.275	4.888	78	1.434	4.4	0.971	2	2	30	68	186	3.8
110791	2	56	4	1	9435.967448	10579.72322	13	38	76	14	22	4.28	103	75	50.39	23	4.61	30	15	134	276	1.162	3.8	139	6.84	2.075	5.172	61	0.644	4	0.652	2	2	14	75	134	3.8
119994	2	55	4	1	11184.56365	11950.00648	13	43	57	11	28	4.64	100	46	52.16	31	9.49	13	13.6	126	291	1.13	4	144	6.84	2.375	5.87	74	1.547	6.2	0.873	1	1	11	46	126	4
114352	2	55	4	1	12058.29633	12526.50931	13	42	101	14	26	5.71	104	64	62.76	27	5.5	13	17.9	143	284	1.324	3.7	142	10.26	2.3	5.327	69	1.298	4.5	0.817	2	2	14	64	143	3.7
124589	2	52	4	1	19017.35692	19741.12529	13	43	76	16	25	7.14	101	151	58.34	30	5.05	9	13.8	185	280	1.259	3.8	139	5.13	2.4	4.836	73	1.185	5.3	0.974	NA	3	16	151	185	3.8
118324	2	52	4	1	13146.19784	13541.75834	13	41	116	15	24	6.78	104	103	55.69	29	5.16	13	15.2	179	285	1.324	4	142	8.55	2.35	5.431	70	1.468	4.3	0.86	0	0	15	103	179	4
123709	2	51	4	1	7832.956388	8690.214901	13	40	100	24	23	5.71	107	87	62.76	36	5.16	26	15.9	202	291	0.84	3.9	146	6.84	2.425	4.784	76	1.818	4.5	0.895	NA	3	24	87	202	3.9
122780	1	80	3	1	13063.42338	14363.82945	13	44	68	14	29	5.71	99	80	48.62	28	7.88	12	23.5	149	287	1.195	4.2	142	13.68	2.425	4.784	72	0.7	2.3	1.275	NA	3	14	80	149	4.2
110412	1	74	3	1	14476.7746	15830.06828	13	34	75	20	23	6.07	103	154	96.36	32	4.77	14	9.5	143	282	0.904	4.6	141	3.42	2.225	5.741	66	2.348	5.5	0.902	NA	3	20	154	143	4.6
113131	2	66	3	1	6322.333907	6813.767397	13	40	97	18	25	5.71	99	72	42.43	28	4.44	13	5.6	108	281	1.292	4.4	141	5.13	2.275	3.724	68	1.931	4.3	0.937	NA	3	18	72	108	4.4
109667	1	64	3	1	5393.904869	5671.225062	13	42	85	19	26	5	103	111	86.63	27	5.27	22	22.9	190	283	0.872	4	142	11.97	2.175	5.043	69	0.892	5.6	1.094	2	2	19	111	190	4
117076	2	61	3	1	9468.641787	10090.19971	13	36	82	12	22	3.57	104	96	44.2	35	7.44	17	11.1	140	288	1.066	4.3	144	1.71	2.275	3.129	71	1.908	4.5	0.888	0	0	12	96	140	4.3
121337	1	72	2	1	4932.339325	5154.333092	13	37	57	15	25	2.86	106	133	76.91	36	4.66	15	10.9	124	281	1.227	3.6	142	5.13	2.275	3.776	73	0.644	4.4	0.979	0	0	15	133	124	3.6
120742	2	65	2	1	3907.416651	4084.908385	13	36	86	15	26	6.78	102	130	92.82	37	4.72	22	12.4	182	285	1.098	3.9	142	3.42	2.325	5.379	73	0.847	7.4	1.402	NA	3	15	130	182	3.9
112927	2	64	2	1	5546.248845	5875.46334	13	36	100	21	23	6.78	102	124	83.98	38	4.88	12	11.8	197	281	1.421	4	140	5.13	2.3	6.232	74	1.75	6.1	0.994	NA	3	21	124	197	4
121593	2	63	2	1	7180.381752	7526.045401	13	38	79	17	26	5	99	107	82.21	32	5	16	18.1	204	281	1.292	4.3	141	5.13	2.475	5.663	70	0.847	6.1	1.025	2	2	17	107	204	4.3
116582	1	63	2	1	7171.03654	7551.678559	13	41	68	14	28	3.57	102	74	82.21	29	4.39	35	13.3	145	285	1.13	4.4	144	3.42	2.25	4.81	70	1.005	3.9	0.882	2	2	14	74	145	4.4
119313	2	62	2	1	4007.403613	4266.790346	13	41	103	14	26	3.93	103	86	88.4	31	5.22	13	13.4	159	280	1.098	3.6	141	5.13	2.3	6.387	72	1.942	6.8	1.046	0	0	14	86	159	3.6
122876	2	61	2	1	15060.07444	15650.7784	13	38	82	17	27	11.42	97	263	155.58	36	5.16	34	7.9	193	284	1.324	2.9	139	3.42	2.375	5.094	74	1.806	11	1.083	1	1	17	263	193	2.9
120960	2	61	2	1	9269.567396	9681.941515	13	42	95	19	29	5.71	103	115	69.84	32	4.77	16	10.2	202	285	1.227	3.4	143	6.84	2.45	4.655	74	1.298	4.4	1.056	0	0	19	115	202	3.4
122283	1	60	2	1	9476.715794	10144.36429	13	44	96	20	28	3.93	101	148	85.75	34	5	23	27	NA	280	0.936	4.5	141	11.97	2.5	5.87	78	1.49	6.4	1.261	2	2	20	148	164	4.5
117365	2	57	2	1	6385.749213	6856.381122	13	35	85	17	26	3.57	100	148	80.44	46	5.38	14	7.5	182	280	1.292	4.2	141	3.42	2.375	5.819	81	1.727	3.8	1.458	0	0	17	148	182	4.2
119065	2	55	2	1	16116.82371	16912.36891	13	40	104	14	28	3.21	100	103	65.42	31	5	26	15.2	156	283	1.259	3.9	143	11.97	2.325	4.396	71	0.971	5	0.85	0	0	14	103	156	3.9
111904	2	53	2	1	26577.22897	30836.88628	13	37	64	20	24	3.93	101	99	63.65	33	4.83	40	20.8	163	280	1.162	4.1	141	6.84	2.3	4.526	70	0.881	5.4	1.576	2	2	20	99	163	4.1
123367	1	80	1	1	22189.22308	25542.46183	13	39	63	16	23	6.43	105	74	107.85	28	6	17	20.2	185	284	0.84	4.4	141	10.26	2.2	4.577	67	1.219	5	1.251	0	0	16	74	185	4.4
113452	1	80	1	1	10266.81009	12221.98805	13	37	60	19	25	5	101	151	76.02	27	5.66	32	18.8	151	273	1.421	4.2	136	5.13	2.3	3.595	64	1.073	4.6	1.245	0	0	19	151	151	4.2
113880	2	74	1	1	57193.73718	59363.50178	13	38	87	23	28	7.14	105	75	61.88	31	4.94	14	9.7	189	289	1.259	4.4	144	3.42	2.3	4.965	69	2.439	3.7	1.106	0	0	23	75	189	4.4
111178	2	74	1	1	53582.19664	57547.99262	13	39	87	16	24	3.93	103	52	94.59	24	5.05	19	11.6	171	280	1.162	4.4	141	5.13	2.325	3.439	63	1.976	5.3	0.914	2	2	16	52	171	4.4
122922	2	73	1	1	23520.86845	25641.73841	13	39	89	21	26	6.43	103	46	53.04	27	4.05	30	9.1	151	280	1.13	4.2	140	3.42	2.425	4.888	66	0.734	4.1	0.728	2	2	21	46	151	4.2
111870	2	70	1	1	24723.20292	27382.51879	13	39	97	21	26	5.36	101	49	67.18	32	5.61	23	10	140	284	1.162	4.1	142	5.13	2.3	5.87	71	2.043	5.3	0.961	2	2	21	49	140	4.1
111792	2	69	1	1	35219.44129	36724.02681	13	41	130	15	24	4.64	101	77	61	29	4.94	20	16.1	NA	281	1.388	4.3	141	3.42	2.35	6.749	70	1.106	5.2	0.817	2	2	15	77	164	4.3
114125	2	68	1	1	40820.83947	52577.51639	13	36	79	16	25	5.36	105	71	75.14	25	5.44	12	14.5	177	284	0.969	4.6	142	5.13	2.225	5.25	61	1.039	5.3	0.936	2	2	16	71	177	4.6
114015	1	62	1	1	26375.8351	29868.02888	13	45	34	15	24	6.43	106	195	115.8	27	5	14	12.5	149	286	0.872	4	143	6.84	2.4	5.275	72	1.242	5.3	1.418	2	2	15	195	149	4
124482	1	61	1	1	86409.42426	91074.11316	13	38	55	14	27	6.43	104	41	90.17	29	5.55	11	26	121	291	1.13	3.9	145	13.68	2.3	4.707	67	1.106	6.9	1.287	2	2	14	41	121	3.9
110454	2	60	1	1	19467.69565	19701.20447	13	42	56	17	26	5	98	73	70.72	30	6	13	15.9	146	275	1.195	4.1	137	11.97	2.425	5.301	72	0.926	4.6	0.89	2	2	17	73	146	4.1
116232	2	60	1	1	16346.17662	16047.219	13	42	91	17	27	5.36	106	102	81.33	31	5.38	24	9.9	191	289	1.033	4	145	5.13	2.4	4.758	73	1.75	4	0.858	0	0	17	102	191	4
124604	2	59	1	1	115506.7027	132532.5178	13	40	37	14	27	5.71	100	66	73.37	24	4.27	9	14.9	142	279	1.55	3.9	140	3.42	2.45	5.689	64	1.682	5.9	1.016	2	2	14	66	142	3.9
116747	2	59	1	1	24784.64173	25889.40992	13	46	75	18	25	5	103	103	73.37	21	4.66	13	17.4	153	285	1.001	3.7	143	8.55	2.4	4.5	67	0.813	4.8	0.881	0	0	18	103	153	3.7
118592	2	54	1	1	311265.1521	321573.5192	13	44	110	25	25	3.57	100	100	68.95	34	5.55	13	28.1	126	279	1.259	3.6	140	13.68	2.575	5.327	78	1.005	6.3	1.149	0	0	25	100	126	3.6
120826	2	52	1	1	103897.3547	106776.1154	13	41	99	17	26	6.43	103	143	72.49	29	5.44	17	14.1	168	287	1.259	4.7	143	8.55	2.4	5.198	70	1.49	5.2	0.993	2	2	17	143	168	4.7
124756	2	80	1	3	20451.08255	26082.59122	12	39	80	15	24	3.93	104	53	83.1	24	5.38	10	9.5	178	282	1.162	4.5	142	5.13	2.3	3.879	63	0.869	4.3	0.858	2	2	15	53	178	4.5
114300	2	80	4	2	7095.449554	7805.036365	12	42	88	17	25	7.85	106	105	126.41	32	4.66	41	27.9	198	291	1.259	4.6	145	5.13	2.425	3.646	74	2.732	4.7	0.708	NA	3	17	105	198	4.6
110443	2	71	4	2	9192.415853	9902.44259	12	41	110	18	26	5	108	131	81.33	27	4.94	12	18.6	189	289	1.356	4	145	6.84	2.2	4.939	68	1.716	3.9	0.729	0	0	18	131	189	4
110258	1	70	4	2	6567.530597	7719.324361	12	35	56	15	27	7.5	99	77	83.98	26	5.55	13	5.4	165	279	1.259	4.1	138	5.13	2.325	4.112	61	0.734	4.5	0.78	0	0	15	77	165	4.1
117305	2	68	4	2	40423.66326	38782.61531	12	38	80	18	22	6.43	105	51	112.27	34	5.16	25	14	172	285	1.098	4.4	142	8.55	2.375	4.784	72	1.964	6.4	1.003	0	0	18	51	172	4.4
109645	2	62	4	2	13838.3691	15422.48836	12	37	139	16	25	5.71	105	58	65.42	33	4.72	21	8.4	166	285	1.13	4.4	143	3.42	2.225	4.37	70	1.039	5.2	0.815	0	0	16	58	166	4.4
113244	2	61	4	2	3517.244078	3681.959984	12	39	72	17	27	5.71	103	86	83.1	35	5.77	17	9.7	155	283	1.388	4	141	6.84	2.3	6.31	74	0.666	4.9	1.084	NA	3	17	86	155	4
111206	1	61	4	2	14453.45435	14361.26544	12	40	78	13	25	7.85	102	54	106.96	29	4.83	27	22	118	286	0.936	4.5	142	13.68	2.425	5.12	69	1.185	8.6	1.224	2	2	13	54	118	4.5
122888	1	53	4	2	21858.5728	21369.20648	12	39	70	8	23	6.07	87	34	119.34	32	30.75	36	9	125	288	1.162	4.4	130	30.78	2.475	6.491	71	3.534	7.5	1.261	0	0	8	34	125	4.4
111658	2	50	4	2	23887.02514	24366.17139	12	37	76	18	23	5.71	104	40	82.21	28	4.94	16	7.2	142	276	0.872	3.8	138	3.42	2.2	4.603	65	1.581	4.3	0.901	2	2	18	40	142	3.8
121824	2	50	4	2	33036.7613	35443.13022	12	38	70	17	27	6.07	101	52	56.58	33	5.38	20	11.8	133	279	1.324	3.9	139	5.13	2.275	5.301	71	1.626	3.4	0.901	2	2	17	52	133	3.9
123775	2	80	3	2	14513.98053	16846.96546	12	40	114	16	25	6.07	102	92	63.65	28	4.94	16	16.1	176	286	1.13	3.2	143	6.84	2.3	4.681	68	0.948	4.9	0.658	1	1	16	92	176	3.2
123375	2	76	3	2	18044.80676	20009.68766	12	40	120	17	25	6.78	104	76	74.26	38	6.11	18	14.7	220	288	1.421	4.6	143	3.42	2.55	5.663	78	1.592	5.1	0.688	0	0	17	76	220	4.6
119630	2	55	3	2	13188.12309	12976.37133	12	36	96	16	24	2.5	102	76	54.81	33	5.22	27	16.3	169	275	1.195	4.1	139	5.13	2.275	5.767	69	2.461	4.9	0.939	0	0	16	76	169	4.1
118651	2	51	3	2	16363.23413	16598.82088	12	40	56	17	27	6.07	99	122	53.92	37	4.5	9	7.9	146	280	1.388	4.3	140	5.13	2.3	6.672	77	2.281	4.2	1.097	0	0	17	122	146	4.3
117714	2	51	3	2	20079.33553	21674.44906	12	38	85	16	24	4.28	103	151	60.11	32	5.66	14	2.7	161	279	1.292	4	140	5.13	2.175	4.551	70	1.366	4	1.018	NA	3	16	151	161	4
116896	2	51	3	2	9125.522257	9547.637924	12	44	49	15	22	7.14	102	101	59.23	34	4.11	14	12.9	145	279	1.259	4	139	10.26	2.225	5.198	78	0.576	5.1	1.014	0	0	15	101	145	4
118809	2	67	2	2	6422.165419	6834.0753	12	36	93	15	22	8.21	105	98	89.28	39	5.5	23	4.8	190	285	1.033	3.8	141	1.71	2.475	4.862	75	0.881	4.9	0.933	NA	3	15	98	190	3.8
115097	2	64	2	2	4214.133672	4354.490555	12	44	47	27	32	5.36	101	295	92.82	29	4.94	18	8.6	178	285	1.13	3.9	143	15.39	2.475	4.5	73	0.576	6.1	0.913	NA	3	27	295	178	3.9
110187	2	58	2	2	6442.42011	6907.204522	12	37	71	12	24	5.71	108	79	76.91	33	5.05	28	18.4	175	289	1.195	4.2	145	5.13	2.35	5.689	70	1.163	4.4	1.221	0	0	12	79	175	4.2
117913	2	57	2	2	7881.872311	8442.927488	12	41	97	15	27	6.07	98	245	83.98	34	5.16	22	12.7	203	282	1.162	4.4	141	5.13	2.35	6.827	75	0.869	6.4	1.082	0	0	15	245	203	4.4
117316	2	55	2	2	9657.282579	10384.9148	12	42	97	15	23	3.93	108	149	65.42	32	5.05	26	10	154	288	1.033	3.9	145	3.42	2.275	6.025	74	0.869	4.3	1.392	0	0	15	149	154	3.9
120204	2	55	2	2	11236.92301	11711.17033	12	37	67	17	27	4.64	104	105	62.76	40	5.05	16	10.4	NA	288	1.227	4.2	145	5.13	2.375	5.793	77	0.869	7.2	1.385	0	0	17	105	164	4.2
114626	2	53	2	2	11519.89358	12297.01953	12	41	89	15	25	4.64	105	234	76.91	29	5.22	21	20.4	206	285	1.292	4.1	143	5.13	2.325	4.603	70	1.027	5.8	1.081	NA	3	15	234	206	4.1
116341	2	80	2	2	7675.861431	8468.336871	12	39	53	17	27	5.71	102	105	63.65	30	5.22	19	13.4	178	284	1.227	4.8	142	6.84	2.3	5.87	69	0.96	4.7	1.133	0	0	17	105	178	4.8
116504	2	80	2	2	11379.22685	12971.7554	12	40	112	14	28	5	102	101	68.95	34	6.05	13	16.3	193	286	1.001	4.3	143	8.55	2.375	6.206	74	1.152	5.4	0.888	2	2	14	101	193	4.3
111554	1	79	2	2	8175.067672	8551.516183	12	42	47	15	28	7.85	99	91	95.47	27	9.16	14	18.3	125	283	1.324	4.3	138	22.23	2.35	3.827	69	0.948	5.2	1.068	2	2	15	91	125	4.3
114351	2	74	2	2	11149.98328	12446.02937	12	39	69	15	23	3.93	104	95	54.81	26	5.33	13	16.5	155	279	0.936	3.8	140	6.84	2.125	4.577	65	0.835	5.9	0.94	0	0	15	95	155	3.8
123506	2	70	2	2	8452.423716	9497.250217	12	41	46	13	23	5.71	104	59	91.94	31	5.38	24	12.5	129	286	1.292	3.9	143	6.84	2.225	5.405	72	1.253	5.3	1.082	0	0	13	59	129	3.9
118104	2	65	2	2	7891.388804	8477.323828	12	36	117	16	22	3.21	107	138	87.52	34	6.05	15	15.8	151	284	1.195	4.2	143	6.84	2.225	3.569	70	0.858	4.6	1.072	NA	3	16	138	151	4.2
110859	1	65	2	2	5142.343759	5490.367106	12	41	70	21	27	4.64	104	382	95.47	28	5.05	13	15.4	167	281	0.872	4.3	141	8.55	2.275	4.655	69	0.971	5.1	1.372	0	0	21	382	167	4.3
123705	2	60	2	2	6283.733686	6372.223427	12	40	63	16	25	3.57	101	61	85.75	33	4.66	39	10.7	153	281	1.227	4.4	142	10.26	2.275	6.232	73	1.84	6.2	0.926	1	1	16	61	153	4.4
114913	2	54	2	2	5823.873788	6740.954797	12	40	72	17	25	3.21	101	156	65.42	34	5.88	30	14.7	151	277	1.033	4	139	8.55	2.3	6.387	74	1.095	4.6	1.136	0	0	17	156	151	4
123899	2	54	2	2	6156.287294	6775.20741	12	41	49	13	23	7.14	101	129	83.98	28	6.77	16	12.5	143	280	1.162	4.1	138	1.71	2.5	3.75	69	0.508	5.3	0.947	0	0	13	129	143	4.1
110079	2	54	2	2	6465.932645	6858.205707	12	42	115	12	25	3.21	100	95	67.18	33	4.61	22	15	148	274	1.195	3.5	138	6.84	2.375	4.939	75	1.231	4	0.943	2	2	12	95	148	3.5
119670	2	52	2	2	21206.05765	23677.88777	12	44	87	14	26	4.28	99	149	71.6	32	4.88	19	16.3	162	275	1.066	3.5	138	6.84	2.425	4.344	76	1.016	5.1	0.98	2	2	14	149	162	3.5
124743	1	54	1	2	26688.1093	29346.21065	12	41	59	16	26	8.21	101	120	73.37	29	5.44	20	13.6	127	283	1.421	4	140	11.97	2.325	4.991	70	2.281	5.3	1.144	2	2	16	120	127	4
115493	2	80	1	2	14398.19855	16784.83872	12	38	85	21	27	6.78	99	50	70.72	35	8.05	15	9.3	145	284	1.356	4.8	140	5.13	2.35	6.413	73	3.172	6	1.382	0	0	21	50	145	4.8
118361	2	80	1	2	13472.73003	18407.97859	12	37	98	18	23	6.07	105	85	63.65	40	6.66	24	13.8	192	288	1.195	3.8	143	6.84	2.25	5.715	77	1.603	5.1	0.745	NA	3	18	85	192	3.8
118296	2	80	1	2	17318.58055	21550.48854	12	41	64	20	22	8.21	103	40	110.5	27	5.33	13	9.7	169	279	1.13	4.5	138	5.13	2.35	4.034	68	1.66	5.8	0.699	0	0	20	40	169	4.5
109652	2	76	1	2	20837.58428	22270.98392	12	42	94	18	25	8.21	102	107	67.18	31	5.33	14	12.4	136	285	1.356	4	141	3.42	2.4	5.482	73	1.637	5.7	0.938	0	0	18	107	136	4
118001	2	75	1	2	51396.34273	72083.6785	12	40	56	16	22	6.43	106	93	74.26	30	4.44	12	18.8	178	282	1.485	4.4	141	5.13	2.375	7.81	70	1.219	5.3	0.803	0	0	16	93	178	4.4
115739	2	67	1	2	148334.7478	149708.8459	12	38	58	14	28	3.57	101	103	75.14	33	6.33	13	13.3	134	281	1.098	3.6	141	6.84	2.175	3.362	71	2.1	6.1	1.198	1	1	14	103	134	3.6
122612	2	67	1	2	48661.53998	51437.07615	12	42	62	20	26	8.21	99	110	81.33	32	5.05	11	19.3	167	283	1.162	4.3	140	8.55	2.375	6.801	74	1.05	5.7	0.828	2	2	20	110	167	4.3
119330	2	70	4	1	15480.8865	16675.84222	12	40	52	23	26	3.21	106	132	67.18	29	7.83	15	8.6	NA	290	1.033	3.8	145	5.13	2.2	4.81	69	6.063	3.9	0.67	NA	3	23	132	164	3.8
112303	2	63	4	1	21687.35697	22463.80935	12	36	89	18	26	3.21	102	22	76.91	29	4.66	7	17	160	279	1.162	4	141	10.26	2.225	4.526	65	0.689	4.8	1.07	1	1	18	22	160	4
120734	2	62	4	1	12544.05292	13478.63532	12	35	65	12	28	6.07	103	58	76.91	30	5.38	13	15.2	147	286	1.453	3.9	143	5.13	2.325	5.612	65	2.642	5.4	1.003	0	0	12	58	147	3.9
112365	2	58	4	1	22382.85613	23382.62252	12	38	61	14	30	7.14	104	81	61.88	32	4.22	13	20.8	175	288	0.936	4.1	144	6.84	2.275	5.689	70	1.535	5.4	0.758	NA	3	14	81	175	4.1
124262	2	56	4	1	21080.87977	20664.52713	12	41	93	17	25	6.07	97	72	79.56	39	5.05	129	14	131	275	1.259	3.7	137	3.42	2.425	5.094	80	0.598	6.2	0.938	2	2	17	72	131	3.7
122576	2	55	4	1	21638.7641	21442.45549	12	42	79	22	31	5.71	100	123	61	36	5.05	22	15.2	172	286	1.13	4.1	143	3.42	2.275	4.81	78	0.937	4.4	0.833	0	0	22	123	172	4.1
122988	2	54	4	1	7804.474747	8588.029845	12	39	79	17	27	5.36	102	72	45.08	35	4.94	17	21.5	126	283	1.13	3.7	142	6.84	2.225	4.577	74	3.906	3.8	0.964	NA	3	17	72	126	3.7
120788	2	54	4	1	14314.7532	15841.20422	12	42	89	16	30	3.93	103	68	53.92	30	5.94	11	20.1	137	290	1.292	3.8	146	10.26	2.4	5.353	72	1.434	6.1	0.874	2	2	16	68	137	3.8
113566	2	52	4	1	23937.48222	27540.66491	12	41	62	15	28	2.86	99	78	48.62	35	5.11	11	18.8	137	276	1.259	3.8	139	6.84	2.325	5.793	76	1.852	4.1	1.178	2	2	15	78	137	3.8
116271	2	52	4	1	11787.25193	12279.62942	12	42	82	13	27	4.64	98	69	64.53	33	5	14	8.4	121	277	1.259	3.3	139	6.84	2.35	5.456	75	3.003	5	0.898	2	2	13	69	121	3.3
115683	2	51	4	1	35809.40352	40410.96121	12	42	102	16	26	4.28	101	128	70.72	34	4.88	17	16.5	153	280	1.227	3.8	141	8.55	2.35	5.327	76	1.197	4.3	1.014	2	2	16	128	153	3.8
116997	1	80	2	1	13374.27446	13509.29612	12	44	54	19	22	3.57	101	127	125.53	32	4.66	17	16.5	134	278	0.904	4.2	140	8.55	2.175	4.81	76	0.734	5.1	0.982	NA	3	19	127	134	4.2
121326	2	70	2	1	13203.83499	14540.51587	12	38	70	20	23	3.57	105	196	73.37	37	5.38	12	12.9	154	284	1.324	3.8	143	6.84	2.225	4.526	75	0.723	4.3	1.022	2	2	20	196	154	3.8
122166	1	70	2	1	6910.028502	7122.654641	12	38	89	14	24	4.64	104	109	89.28	30	6.27	20	12.9	151	282	1.066	4.1	141	8.55	2.225	4.474	68	1.569	4.8	1.289	NA	3	14	109	151	4.1
116493	1	67	2	1	4934.650308	5133.898092	12	40	64	15	26	3.21	103	128	68.07	27	4.94	13	15.2	139	285	1.098	4	144	11.97	2.225	3.051	67	0.587	6.2	1.054	2	2	15	128	139	4
119944	2	65	2	1	6078.006692	6404.432529	12	39	95	16	28	8.57	104	99	116.69	31	7.11	10	13.8	250	296	1.453	3.9	146	10.26	2.1	3.905	70	1.197	10.3	0.975	0	0	16	99	250	3.9
121175	1	63	2	1	9057.833712	9505.429304	12	43	73	18	28	5.71	106	139	99.01	26	4.5	29	23.1	165	285	1.033	4.7	143	8.55	2.35	3.827	69	1.242	4	1.277	0	0	18	139	165	4.7
121975	1	62	2	1	13305.00395	14229.96057	12	41	72	14	27	8.21	99	126	167.08	29	4.55	25	14.1	143	282	1.421	3.6	140	3.42	2.45	6.31	70	2.134	7.4	0.937	2	2	14	126	143	3.6
124488	1	58	2	1	6706.148403	7143.424151	12	38	55	11	29	3.93	104	71	90.17	24	4.61	16	9.7	105	285	1.195	3.7	144	3.42	2.25	4.784	62	0.723	4.7	1.255	2	2	11	71	105	3.7
110699	2	56	2	1	7701.698061	8157.115512	12	35	71	13	24	4.64	97	50	55.69	33	4.88	46	14	118	279	1.033	3.2	140	3.42	2.225	4.5	68	1.592	5.7	1.254	0	0	13	50	118	3.2
119644	1	53	2	1	21744.17053	23197.92496	12	35	77	16	27	5.71	97	58	96.36	39	5.27	261	5	120	273	1.227	3.5	136	5.13	2.4	3.646	74	1.434	4	1.22	2	2	16	58	120	3.5
111046	2	50	2	1	26346.77186	27432.48071	12	35	66	11	23	4.28	100	32	48.62	36	6.33	22	7.2	134	273	1.066	3.8	136	1.71	2.225	4.112	71	0.96	4.3	1.147	0	0	11	32	134	3.8
110377	2	80	1	1	11032.67144	13079.81257	12	38	54	21	27	7.5	99	77	92.82	30	4.94	11	9.7	147	274	1.356	4.6	136	3.42	2.25	3.931	68	2.484	3.3	0.677	1	1	21	77	147	4.6
111136	1	80	1	1	9703.282254	11615.21497	12	39	45	17	24	5.36	102	64	69.84	26	5.66	22	23.6	174	282	1.033	4.3	141	27.36	2.275	4.344	65	0.644	3.8	1.081	NA	3	17	64	174	4.3
111866	1	77	1	1	86135.60201	93932.64756	12	38	77	15	30	3.57	100	104	88.4	31	5.77	18	20.8	185	279	0.936	4	140	13.68	2.325	4.551	69	0.982	3.9	1.06	NA	3	15	104	185	4
110662	2	76	1	1	15949.58797	17057.14091	12	38	98	15	24	4.28	97	65	67.18	32	5.72	13	12.5	128	270	1.324	4.7	135	3.42	2.3	5.094	70	1.852	3.7	0.996	NA	3	15	65	128	4.7
118634	2	74	1	1	12580.12511	13262.75665	12	39	86	19	25	6.78	99	136	74.26	30	5.27	9	8.6	162	280	1.195	4.3	139	5.13	2.375	4.836	69	1.569	4.2	0.89	0	0	19	136	162	4.3
121089	2	72	1	1	31909.57952	34252.56161	12	35	107	16	26	6.43	101	65	68.95	33	5.94	14	10.2	191	280	1.259	4.3	139	3.42	2.325	5.405	68	0.858	5.6	0.939	NA	3	16	65	191	4.3
111835	1	72	1	1	34065.31441	36681.44967	12	40	68	19	25	9.28	105	145	82.21	19	5	11	14.7	161	289	1.098	4.1	143	15.39	2.25	4.086	59	0.519	4.2	0.864	2	2	19	145	161	4.1
112802	1	71	1	1	65147.32027	68091.5814	12	39	69	12	25	14.28	102	93	139.67	30	5.66	15	17.9	113	293	1.162	4.9	142	15.39	2.35	4.888	69	1.569	8.5	1.319	NA	3	12	93	113	4.9
116920	2	70	1	1	42389.78076	49943.07894	12	40	65	19	23	5	103	200	83.1	29	4.88	16	15.2	164	281	1.001	4.4	141	6.84	2.275	5.689	69	1.197	5.2	0.903	0	0	19	200	164	4.4
121830	2	69	1	1	41813.69864	44198.65056	12	45	67	13	24	5.36	104	113	59.23	29	5	12	14.7	155	285	1.356	4	143	3.42	2.325	4.939	74	0.79	4.6	0.905	2	2	13	113	155	4
113897	1	69	1	1	30181.94244	32976.39149	12	44	38	18	26	6.07	100	141	92.82	28	5.33	20	23.8	154	283	1.195	4	141	6.84	2.35	5.87	72	1.456	6.5	1.119	2	2	18	141	154	4
118229	1	69	1	1	40146.52685	43133.94324	12	39	61	16	25	5	102	84	104.31	28	4.77	15	20.8	157	279	0.936	3.9	140	15.39	2.225	5.974	67	1.152	7.1	1.026	2	2	16	84	157	3.9
115604	1	68	1	1	26231.62381	29299.65674	12	39	78	16	23	3.93	103	139	54.81	30	6.77	17	26.7	132	286	1.066	4	143	8.55	2.325	4.267	69	1.039	6.1	1.005	0	0	16	139	132	4
122473	2	67	1	1	8108.159049	10520.26285	12	40	62	13	29	6.43	104	47	62.76	27	6.16	60	20.2	144	289	0.84	4.5	144	6.84	2.5	8.146	67	2.698	8.2	1.183	2	2	13	47	144	4.5
117161	2	67	1	1	17412.14879	17084.34258	12	38	87	17	27	5.71	99	86	58.34	27	5.11	10	22.4	182	282	1.13	4.2	141	5.13	2.275	4.991	65	1.366	4.4	1.031	0	0	17	86	182	4.2
109348	2	63	1	1	34811.82742	37103.82064	12	46	56	24	27	6.43	99	119	68.07	23	5.33	26	9.9	175	281	1.292	3.8	140	5.13	2.275	6.336	69	1.253	4.2	0.803	2	2	24	119	175	3.8
118536	2	61	1	1	89842.67734	92708.96365	12	39	63	19	25	3.21	99	115	61	27	4.66	23	10.9	150	277	1.162	3.8	140	8.55	2.3	5.275	66	1.016	4.4	0.973	2	2	19	115	150	3.8
116980	2	61	1	1	172087.8474	179148.117	12	39	103	16	29	10.71	98	102	89.28	33	7.27	15	8.6	198	284	1.324	4.6	138	3.42	2.325	7.629	72	1.953	2.4	0.885	NA	3	16	102	198	4.6
119642	2	59	1	1	23157.70274	23558.43296	12	36	60	11	24	5.71	103	33	82.21	25	5.33	18	14.7	144	277	1.195	4.2	138	3.42	2.225	8.094	61	3.613	6.3	1.058	0	0	11	33	144	4.2
116547	2	59	1	1	25390.81805	26114.94235	12	42	66	17	28	5.36	100	111	71.6	27	5	10	18.4	151	280	1.356	4.2	140	10.26	2.35	5.741	69	0.982	4	1.01	0	0	17	111	151	4.2
118082	1	57	1	1	126183.0349	135640.9211	12	43	56	19	22	5	101	122	67.18	28	5.38	119	12.4	135	274	1.098	4	137	22.23	2.325	5.715	71	3.963	5.8	1.039	0	0	19	122	135	4
114147	2	56	1	1	39056.19901	39752.08686	12	43	48	17	25	10	102	146	96.36	27	5.27	9	15.8	191	287	1.324	4.3	141	3.42	2.3	4.603	70	0.926	4.5	0.925	2	2	17	146	191	4.3
122703	2	53	1	1	39444.46686	42910.15537	12	40	80	16	26	5.71	105	82	66.3	34	4.44	9	20.8	151	287	1.13	4.6	144	5.13	2.325	5.146	74	0.994	4.1	1.025	2	2	16	82	151	4.6
119834	1	52	1	1	23331.26511	25797.69316	12	37	66	18	25	2.86	105	143	84.86	33	5.33	19	18.3	152	279	1.066	3.9	141	8.55	2.15	5.431	70	1.558	4.1	1.132	0	0	18	143	152	3.9
112471	2	79	4	2	21782.87182	23807.81601	11	41	63	15	31	7.5	103	78	62.76	31	4.39	12	15.6	145	287	1.292	4.2	143	6.84	2.25	4.474	72	1.626	5.8	0.849	2	2	15	78	145	4.2
122943	2	78	4	2	7372.444423	8005.917037	11	37	86	13	24	5.36	103	48	44.2	28	6.49	18	11.1	173	281	1.324	4.1	140	5.13	2.35	4.396	65	1.264	3	0.678	NA	3	13	48	173	4.1
121929	2	64	4	2	14900.23965	15511.25531	11	37	117	18	22	4.64	102	141	81.33	42	5.83	18	13.8	145	274	1.13	4.2	137	3.42	2.35	5.094	79	2.258	5.4	0.975	0	0	18	141	145	4.2
117817	2	54	4	2	12991.74166	12367.36074	11	38	113	17	28	4.28	103	84	83.98	32	4.94	11	19.7	171	284	1.388	4.1	143	6.84	2.325	5.715	70	1.208	4.5	1.093	2	2	17	84	171	4.1
109677	2	76	4	2	17403.34953	18746.69844	11	37	105	19	21	12.85	106	86	157.35	32	7.99	20	19.7	162	290	1.227	5	140	5.13	2.35	4.526	69	1.964	6.2	0.995	2	2	19	86	162	5
115147	2	65	4	2	11237.65924	12515.30227	11	41	125	16	26	3.93	101	62	50.39	35	5.5	7	18.6	133	279	1.227	4.3	140	8.55	2.375	5.689	76	1.31	3.4	0.635	NA	3	16	62	133	4.3
116104	2	53	4	2	13308.30059	14469.91261	11	41	65	16	25	7.14	103	56	64.53	28	5.66	19	12.5	159	286	1.388	3.4	142	6.84	2.275	6.103	69	0.96	5.1	0.968	2	2	16	56	159	3.4
121873	2	68	3	2	7153.191629	7591.073717	11	35	68	16	23	5.36	103	104	61.88	32	4.83	25	16.7	230	278	1.033	3.9	139	6.84	2.225	6.31	67	1.298	3.9	0.647	NA	3	16	104	230	3.9
120286	2	62	3	2	5134.115753	5337.067949	11	40	87	13	22	3.21	99	35	48.62	29	7.94	19	11.5	126	281	1.13	4.2	140	5.13	2.25	3.931	69	0.96	2.9	0.901	NA	3	13	35	126	4.2
118072	2	56	3	2	15090.89524	14937.62492	11	39	79	15	23	4.28	105	80	61.88	32	5	22	5	205	286	1.259	3.7	144	3.42	2.225	5.017	71	1.016	6.2	0.844	2	2	15	80	205	3.7
122376	2	74	2	2	12316.7894	13588.40604	11	41	89	20	27	8.57	103	180	101.66	26	4.55	15	19.3	165	290	1.356	4.5	144	6.84	2.375	5.793	67	1.027	4.9	0.59	0	0	20	180	165	4.5
121451	2	60	2	2	11139.98488	12149.17909	11	40	54	15	25	5.36	108	93	64.53	27	4.22	21	10.2	119	292	1.292	4	147	3.42	2.4	3.905	67	1.197	4.2	1.172	NA	3	15	93	119	4
115603	2	60	2	2	9865.990383	10234.20394	11	40	130	11	27	4.64	106	60	51.27	34	4.77	41	11.3	123	288	1.195	4.1	145	5.13	2.3	4.681	74	0.711	3.5	0.957	NA	3	11	60	123	4.1
120710	1	53	2	2	9559.958806	9816.562509	11	41	93	21	35	6.78	97	505	114.92	31	5	19	14.7	175	285	1.13	3.7	142	6.84	2.325	4.629	72	1.31	6.9	1.202	0	0	21	505	175	3.7
109959	2	80	2	2	12729.447	14164.37623	11	36	109	14	26	11.07	97	70	156.47	38	5.16	12	14.9	177	284	1.033	4.2	139	6.84	2.35	5.637	74	1.321	8.2	1.206	1	1	14	70	177	4.2
110925	1	80	2	2	15744.85673	16847.31259	11	37	35	13	25	8.21	103	85	118.46	30	5.77	44	10.6	184	282	1.259	4.2	139	10.26	2.25	2.483	67	0.542	6.4	1.034	1	1	13	85	184	4.2
110384	1	80	2	2	8847.067236	9419.202755	11	41	60	15	27	5	103	178	114.92	33	5.11	13	5.7	184	280	0.969	3.9	140	8.55	2.25	4.086	74	0.632	4.6	0.797	2	2	15	178	184	3.9
119073	2	77	2	2	18714.20188	21027.51399	11	38	95	12	25	6.78	96	106	129.95	36	19.65	45	8.8	218	290	1.033	3.9	137	10.26	2.15	4.396	74	2.1	4.9	1.063	NA	3	12	106	218	3.9
124119	1	71	2	2	3947.683237	4002.811607	11	36	93	23	27	2.86	98	101	110.5	31	5.88	26	20.2	NA	274	0.872	4.7	138	8.55	2.3	3.672	67	0.576	1.8	1.069	1	1	23	101	164	4.7
117117	2	68	2	2	3866.544288	4113.122062	11	36	64	12	25	7.5	108	97	111.38	28	6.27	17	8.1	151	291	1.066	3.8	144	1.71	2.2	4.681	64	1.705	4.4	1.019	0	0	12	97	151	3.8
123578	1	68	2	2	4926.231	5268.699891	11	39	106	9	20	3.93	109	48	102.54	36	6.88	46	9.3	173	290	0.872	4.5	145	3.42	2.275	3.155	75	0.813	5	1.087	0	0	9	48	173	4.5
117432	2	66	2	2	6923.280813	7011.768016	11	38	62	14	24	4.28	106	83	59.23	33	5.11	11	18.8	153	283	1.066	3.8	142	13.68	2.15	3.982	71	1.185	5.1	1.116	1	1	14	83	153	3.8
109990	1	66	2	2	7086.70958	7334.97475	11	37	75	18	26	3.57	99	207	83.98	41	5.05	101	19.2	138	274	1.421	3.7	138	6.84	2.35	3.465	78	2.077	5.8	0.791	0	0	18	207	138	3.7
115908	1	65	2	2	6544.609724	6880.730508	11	38	70	17	24	5	101	158	83.1	32	6.49	12	14.7	119	277	0.743	3.3	138	11.97	2.35	4.81	70	0.452	5.8	1.205	2	2	17	158	119	3.3
113038	1	65	2	2	3263.809883	3440.139255	11	42	96	18	24	6.07	101	121	91.94	48	5.05	21	6.8	146	281	1.066	4.5	140	8.55	2.4	3.181	90	0.847	6.2	0.888	1	1	18	121	146	4.5
116385	2	60	2	2	2747.824011	2817.705897	11	36	81	12	27	10.35	95	134	90.17	32	6.99	33	17.4	156	287	0.678	3.4	140	11.97	2.25	4.551	68	1.671	5.8	1.44	0	0	12	134	156	3.4
113450	2	60	2	2	10318.83431	11049.62022	11	37	126	12	23	7.14	106	63	135.25	34	5.38	20	8.1	156	288	1.13	3.7	143	5.13	2.35	3.465	71	1.885	7.6	1.046	0	0	12	63	156	3.7
118125	2	57	2	2	32460.75636	33365.74838	11	42	105	16	28	6.43	97	201	85.75	34	5.44	18	9.3	196	276	1.195	3.7	137	3.42	2.375	5.715	76	1.445	4.6	1.311	2	2	16	201	196	3.7
118894	2	52	2	2	6900.905993	7594.686081	11	35	70	14	28	3.93	104	174	86.63	34	4.83	10	13.3	152	287	1.098	4.1	145	5.13	2.325	4.913	69	0.711	5.6	0.992	0	0	14	174	152	4.1
119193	2	52	2	2	4896.981506	5058.412505	11	40	87	14	23	2.14	107	106	74.26	29	4.61	9	10	174	284	1.292	3.5	144	13.68	2.375	2.948	69	0.734	3.2	0.778	0	0	14	106	174	3.5
115875	2	67	1	2	31050.07108	31364.34127	11	39	70	15	23	5.71	105	87	63.65	29	6.99	15	16.8	123	286	1.001	4.3	142	5.13	2.225	4.836	68	1.287	6.9	1.009	2	2	15	87	123	4.3
122571	1	59	1	2	19907.06363	22715.64313	11	43	55	16	23	3.21	99	84	83.1	27	4.5	34	14.9	168	270	1.066	3.8	136	6.84	2.325	3.051	70	0.666	5.7	1.11	0	0	16	84	168	3.8
118395	2	56	1	2	23003.55329	23881.08664	11	41	89	20	21	8.93	97	22	156.47	39	5.22	33	9.3	213	274	1.259	3.4	135	10.26	2.7	4.448	80	1.795	10.9	0.867	0	0	20	22	213	3.4
121576	2	55	1	2	39150.27344	40985.57431	11	38	47	12	25	5.36	102	27	54.81	33	4.39	10	14	122	283	1.259	4	142	5.13	2.225	6.077	71	1.027	3.3	1.15	2	2	12	27	122	4
122649	2	80	1	2	8486.925296	10631.72723	11	40	94	13	26	4.64	98	97	76.02	28	5.38	15	17	198	279	1.259	4	140	5.13	2.25	6.879	68	1.016	3.4	0.836	1	1	13	97	198	4
109776	2	80	1	2	15527.55694	17430.22467	11	39	98	16	24	6.43	104	74	62.76	33	6.88	30	8.1	158	286	1.259	3.9	142	8.55	2.25	3.982	72	2.303	4.2	0.699	0	0	16	74	158	3.9
111067	2	80	1	2	19362.02662	22536.55519	11	36	124	20	24	6.43	102	94	90.17	26	4.61	20	17.2	194	282	1.195	3.8	141	13.68	2.25	7.887	62	1.773	6	0.639	2	2	20	94	194	3.8
117010	2	74	1	2	55004.79187	59803.42262	11	39	72	11	27	7.14	103	85	49.5	26	6.77	17	9	152	289	1.259	3.6	143	3.42	2.325	5.25	65	1.445	5.6	1.052	1	1	11	85	152	3.6
110045	2	69	1	2	33056.73261	43928.1281	11	34	61	16	21	7.14	106	47	60.11	29	5.33	39	11.6	133	280	1.098	4.5	139	5.13	2.175	4.681	63	1.106	7.1	0.902	NA	3	16	47	133	4.5
120062	2	68	1	2	15195.99417	16765.46721	11	39	116	15	23	11.07	100	51	120.22	35	5.22	13	11.3	172	289	1.227	3.8	142	3.42	2.5	6.103	74	1.129	7.7	1.199	0	0	15	51	172	3.8
123582	2	65	1	2	16206.04521	17894.17468	11	41	61	17	28	6.43	94	39	50.39	27	4.83	24	39.6	154	275	1.292	4	137	20.52	2.5	6.517	68	1.005	4.3	1.049	0	0	17	39	154	4
124657	2	57	1	2	15284.14801	17033.6651	11	43	49	20	26	3.93	101	84	54.81	27	5.05	5	13.4	160	273	1.195	3.5	137	8.55	2.35	5.767	70	0.7	2.5	1.119	0	0	20	84	160	3.5
115778	2	57	1	2	29705.82012	34258.50313	11	40	142	14	24	5.36	103	124	45.08	27	3.77	9	19.5	197	282	1.292	4.2	142	3.42	2.325	6.077	67	1.66	4.2	0.858	NA	3	14	124	197	4.2
120410	2	51	1	2	24135.13672	26169.53895	11	42	58	14	23	6.43	107	69	66.3	24	4.72	14	12.5	150	286	1.098	4.1	143	17.1	2.35	5.689	66	0.7	5.5	0.886	2	2	14	69	150	4.1
115341	2	80	4	1	7440.186371	7690.187924	11	43	82	19	23	5.71	97	117	68.07	34	5.66	10	27.8	182	273	1.292	3.7	136	13.68	2.35	6.025	77	1.671	6.2	0.627	0	0	19	117	182	3.7
122038	2	73	4	1	22780.94701	25448.73555	11	43	76	16	27	6.07	101	43	77.79	35	5.22	12	16.1	178	284	1.388	4.7	142	5.13	2.375	4.939	78	1.129	4.4	0.567	0	0	16	43	178	4.7
122139	1	72	4	1	13852.48506	15207.78338	11	43	67	14	29	6.78	99	61	100.78	27	7.38	12	15.8	94	289	1.033	4.4	143	8.55	2.325	4.448	70	1.355	2.2	1.287	0	0	14	61	94	4.4
117222	1	67	4	1	2709.200538	2858.088056	11	47	58	17	28	3.93	100	178	79.56	37	5.05	17	21	182	282	1.13	4.8	142	6.84	2.45	3.724	84	0.745	5.1	1.365	0	0	17	178	182	4.8
119648	2	65	4	1	11532.87034	12128.77756	11	38	57	14	23	4.28	97	60	59.23	31	5.33	11	13.3	124	270	1.195	4.7	135	3.42	2.3	3.801	69	1.231	3.7	0.764	2	2	14	60	124	4.7
122287	2	64	4	1	17465.15607	19760.66815	11	37	32	17	27	5	104	56	77.79	31	5.27	12	15.2	129	280	1.324	4.1	140	6.84	2.3	5.456	68	0.869	4.2	0.806	2	2	17	56	129	4.1
118767	2	62	4	1	12232.92257	13041.41188	11	37	70	14	25	5	101	64	59.23	26	6.55	13	9.9	146	283	1.324	4.1	141	5.13	2.225	5.612	63	1.14	4	0.626	2	2	14	64	146	4.1
118872	1	62	4	1	9064.448184	9368.428324	11	40	67	15	25	7.14	104	51	81.33	34	5.05	14	21.9	112	289	1.066	3.9	144	17.1	2.35	5.974	74	3.692	6.3	1.103	2	2	15	51	112	3.9
113699	2	61	4	1	9959.468861	10701.48935	11	42	88	14	26	3.57	106	111	59.23	33	5.5	8	10.6	157	286	1.001	4.2	144	8.55	2.275	4.913	75	0.96	4.5	0.918	0	0	14	111	157	4.2
112335	2	58	4	1	19843.01623	20945.63798	11	43	80	11	27	5.71	101	79	54.81	29	5.5	23	11.3	162	279	1.066	4.1	139	5.13	2.35	5.56	72	0.587	3	0.904	NA	3	11	79	162	4.1
116610	2	55	4	1	14466.30409	15825.01629	11	39	69	16	26	4.64	105	97	76.02	27	5.27	11	17.4	194	285	1.292	4.3	143	3.42	2.375	6.129	66	1.377	5.9	0.806	2	2	16	97	194	4.3
117753	2	53	4	1	12611.45686	13956.27721	11	40	60	16	27	3.57	103	56	51.27	29	5.27	13	9.9	151	278	1.162	3.9	140	5.13	2.3	5.043	69	0.835	4.1	0.819	2	2	16	56	151	3.9
113341	2	53	4	1	11443.6201	12830.72817	11	37	80	15	25	3.21	101	133	56.58	37	4.39	15	10	158	279	0.969	3.7	141	5.13	2.125	4.319	74	0.756	4.1	0.766	2	2	15	133	158	3.7
118211	2	50	4	1	10737.55598	12118.82591	11	37	45	14	23	3.21	102	82	46.85	35	5.05	21	15.9	129	278	1.033	4	140	5.13	2.175	5.534	72	1.535	4.8	1.034	2	2	14	82	129	4
113357	2	74	3	1	12015.31213	12958.46262	11	46	74	18	25	8.21	100	112	68.95	34	5.05	22	14.3	198	283	1.259	3.9	140	3.42	2.4	4.681	80	2.642	5.3	0.89	2	2	18	112	198	3.9
113631	2	64	3	1	6070.626838	6319.038998	11	38	80	13	25	3.57	105	58	58.34	32	5.22	22	16.3	126	284	1.13	4	143	5.13	2.325	4.215	70	2.427	5.4	0.885	2	2	13	58	126	4
112731	2	55	3	1	25204.74378	25678.55116	11	42	119	14	26	3.21	98	56	69.84	32	4.88	17	14.3	129	274	1.292	3.9	138	10.26	2.4	6.879	74	2.687	4.6	0.876	2	2	14	56	129	3.9
112955	2	54	3	1	32371.14272	30242.21048	11	43	122	13	24	5.36	102	86	46.85	29	5.27	16	7.5	153	287	1.421	3.9	144	3.42	2.35	4.707	72	0.723	4.4	1.04	2	2	13	86	153	3.9
121406	2	78	2	1	5690.525966	6424.55384	11	37	62	16	26	6.07	104	60	103.43	39	4.72	10	14.1	145	286	1.195	3.9	143	5.13	2.35	3.543	76	1.66	5.2	0.927	0	0	16	60	145	3.9
124040	1	78	2	1	6526.838635	6784.83753	11	41	78	18	21	10	97	68	158.24	29	4.88	58	10	174	277	1.162	4.5	136	5.13	2.3	6.568	70	1.784	7.6	1.254	1	1	18	68	174	4.5
119587	1	70	2	1	11829.27872	12190.85621	11	37	89	34	23	3.57	103	97	119.34	42	4.33	103	25.1	208	287	1.066	4.8	145	10.26	2.575	4.189	79	1.524	6.9	1.162	0	0	34	97	208	4.8
110813	1	66	2	1	3482.326286	3721.559444	11	35	103	16	28	5	104	273	93.7	36	5.5	27	8.2	150	287	1.098	3.7	144	6.84	2.3	4.344	71	1.05	6.2	0.845	0	0	16	273	150	3.7
118861	2	65	2	1	5518.755317	5801.784723	11	38	99	14	24	4.64	103	157	66.3	32	4.5	13	10.2	156	279	1.356	3.6	140	5.13	2.3	4.526	70	1.84	6.4	0.989	2	2	14	157	156	3.6
110441	1	64	2	1	7283.168444	7972.129723	11	35	56	20	24	4.28	97	278	140.56	32	6.05	90	6.3	161	270	1.227	3.8	135	10.26	2.175	4.965	67	1.016	4.9	1.387	0	0	20	278	161	3.8
122814	2	60	2	1	9511.081495	9827.859712	11	38	72	15	28	5	105	91	85.75	33	4.61	17	13.6	123	286	0.936	4.2	144	5.13	2.55	4.707	71	0.689	4	1.057	2	2	15	91	123	4.2
113819	1	60	2	1	8115.653467	8428.740772	11	39	75	14	27	7.5	99	165	99.01	36	10.71	18	13.3	125	282	1.13	3.5	137	10.26	2.325	4.888	75	0.835	5.4	1.151	2	2	14	165	125	3.5
110510	2	59	2	1	3630.852512	3768.937634	11	38	86	13	27	4.64	103	161	83.98	34	5.11	14	12.9	157	287	1.324	3.5	144	10.26	2.225	3.801	72	0.881	5.2	1.062	NA	3	13	161	157	3.5
120310	2	52	2	1	11960.72654	13245.29735	11	36	89	12	25	5	106	54	69.84	31	4.5	20	15.4	143	281	1.033	4.6	141	5.13	2.3	4.396	67	1.05	3.6	1.026	0	0	12	54	143	4.6
123854	1	52	2	1	6247.017201	6728.907458	11	37	69	17	22	25.35	109	308	269.62	33	7.22	18	6.4	206	313	1.55	4.2	146	3.42	1.95	3.414	70	0.994	10.9	1.295	2	2	17	308	206	4.2
121847	2	80	1	1	14480.60214	15943.31309	11	34	75	16	27	5.71	102	48	69.84	27	5.22	12	4.7	179	286	1.292	4.6	143	3.42	2.2	4.138	61	2.54	5.3	1.163	2	2	16	48	179	4.6
119493	2	80	1	1	29568.88123	32455.64695	11	38	97	18	28	5.71	99	48	81.33	24	10.71	19	10.7	165	280	0.936	4.2	137	6.84	2.325	3.233	62	2.755	6	1.059	2	2	18	48	165	4.2
118362	2	80	1	1	31254.93141	35261.00534	11	42	109	19	29	4.28	102	38	74.26	26	5.22	15	13.6	156	286	1.292	4.4	144	8.55	2.35	3.543	68	1.637	4	0.888	2	2	19	38	156	4.4
118146	1	80	1	1	30957.28258	35797.12309	11	40	88	16	28	11.42	104	103	109.62	32	5.77	23	12.9	151	292	1.098	5.1	143	3.42	2.3	3.931	72	2.055	7.2	0.995	2	2	16	103	151	5.1
109483	2	76	1	1	49297.9768	68569.7294	11	39	70	15	24	6.43	93	46	71.6	36	6.33	26	16.8	209	269	1.324	4.4	133	8.55	2.4	2.715	75	2.597	4.7	1.387	NA	3	15	46	209	4.4
122291	1	73	1	1	5412.709043	6271.872238	11	42	83	15	26	18.92	100	73	237.8	28	4.83	24	9.1	171	299	1.453	4.9	143	5.13	2.35	5.017	70	2.111	7.2	0.896	0	0	15	73	171	4.9
114298	2	70	1	1	32110.07691	38285.53593	11	41	94	16	26	3.93	102	79	66.3	28	5.66	12	18.1	144	283	1.098	4.1	142	6.84	2.35	7.008	69	1.716	4.8	0.724	2	2	16	79	144	4.1
113516	2	65	1	1	4280.912644	4243.818179	11	40	104	13	24	4.64	107	116	84.86	26	5.11	18	7.9	196	283	1.259	4.6	142	5.13	2.15	3.077	66	1.524	4.4	1.329	NA	3	13	116	196	4.6
120450	2	61	1	1	53560.07349	55845.52721	11	37	55	20	26	6.07	103	96	62.76	38	4.61	10	9.5	118	280	1.388	4.4	140	5.13	2.35	4.629	75	0.553	4.8	1.02	2	2	20	96	118	4.4
111938	2	57	1	1	95930.08135	99925.30966	11	38	55	15	27	7.14	104	45	61.88	23	4.72	9	11.5	97	279	1.259	4.5	139	3.42	2.275	4.344	61	0.723	3.3	1.033	2	2	15	45	97	4.5
114901	2	57	1	1	142607.5206	155121.8481	11	40	108	16	28	2.86	98	90	65.42	29	4.88	12	10	150	272	1.356	3.6	137	8.55	2.35	7.293	69	2.168	4.5	0.852	2	2	16	90	150	3.6
116118	2	56	1	1	76069.9751	82318.2742	11	43	81	17	25	7.5	101	81	88.4	24	4.94	9	23.3	151	284	1.356	4.1	141	8.55	2.375	6.853	67	0.644	5.1	0.811	2	2	17	81	151	4.1
123787	1	56	1	1	150477.9821	163845.7195	11	44	56	20	25	6.07	102	115	102.54	24	4.66	16	12.7	128	280	1.292	3.9	140	11.97	2.3	5.534	68	1.524	6.7	1.142	2	2	20	115	128	3.9
116510	2	55	1	1	65140.88054	69288.96049	11	41	60	14	22	6.07	102	47	64.53	30	5.55	13	22	172	281	1.421	4	140	10.26	2.1	5.844	71	1.468	5.1	1.065	2	2	14	47	172	4
111282	2	54	1	1	16037.89975	16461.4278	11	37	84	11	25	3.93	98	22	31.82	31	13.71	34	10.9	137	287	1.259	4.4	140	5.13	2.25	7.189	68	2.247	2.7	0.949	0	0	11	22	137	4.4
119825	2	51	1	1	51416.98061	54568.99925	11	41	72	16	28	4.64	101	105	70.72	34	5.27	13	22	79	277	1.324	4.8	139	8.55	2.375	6.025	75	1.75	4.7	0.902	NA	3	16	105	79	4.8
117879	1	50	1	1	31396.24354	33777.65538	11	38	65	9	28	4.28	98	82	62.76	33	15.38	13	16.8	107	285	1.13	4.2	138	3.42	2.325	5.25	71	1.174	4.8	1.098	1	1	9	82	107	4.2
120444	2	62	4	2	10801.36252	11181.3565	10	40	73	12	24	4.64	101	129	51.27	33	6.11	20	13.3	138	280	1.066	4.3	140	6.84	2.45	4.862	73	2.043	6.7	1.041	0	0	12	129	138	4.3
112580	2	58	4	2	11338.45007	12423.65757	10	39	76	13	24	6.43	96	64	113.15	30	11.49	31	13.8	167	284	1.259	3.9	138	3.42	2.3	4.551	69	1.581	7	1.046	0	0	13	64	167	3.9
117370	1	52	4	2	6547.487944	7159.48589	10	34	58	10	28	4.64	100	52	80.44	33	4.44	18	9.9	113	277	1.162	4.4	139	5.13	2.25	4.526	67	1.05	3.4	0.902	1	1	10	52	113	4.4
111352	2	80	4	2	16238.32039	18525.28641	10	39	104	20	26	7.14	102	91	53.04	35	4.55	26	6.6	192	285	1.453	4.2	142	3.42	2.375	5.456	74	1.603	3.8	0.919	0	0	20	91	192	4.2
117312	2	78	4	2	14235.51467	15131.7699	10	40	54	16	23	11.42	97	131	165.31	33	4.77	16	10.4	240	278	1.162	3.8	136	3.42	2.525	6.362	73	1.998	8.1	0.913	0	0	16	131	240	3.8
114186	1	76	4	2	58012.8491	63564.70767	10	44	84	17	24	6.43	102	50	61.88	32	5.77	11	11.1	113	280	1.033	3.5	139	6.84	2.375	3.336	76	0.745	4.2	1.013	2	2	17	50	113	3.5
117711	2	60	4	2	6400.326459	6578.258298	10	39	118	15	26	5.36	105	81	61	32	6.44	13	12.9	135	291	0.936	3.9	145	3.42	2.275	5.198	71	1.423	4.7	0.751	2	2	15	81	135	3.9
117510	2	51	4	2	6999.788286	7649.864005	10	45	64	15	28	3.21	99	171	50.39	34	4.55	11	7.9	162	272	1.227	3.8	137	8.55	2.275	5.172	79	0.655	4.1	1.038	0	0	15	171	162	3.8
109392	1	79	3	2	6993.537331	7392.383739	10	40	89	17	23	9.28	110	138	142.32	29	4.77	20	15.9	194	295	1.033	4.6	146	8.55	2.3	4.732	69	1.095	7.3	0.836	NA	3	17	138	194	4.6
114903	2	74	3	2	31431.99	35635.04096	10	37	93	15	30	8.93	99	69	84.86	35	5.5	15	17.4	141	282	0.936	3.8	139	10.26	2.225	3.853	72	1.558	7.7	0.957	2	2	15	69	141	3.8
123937	2	50	3	2	28402.21026	28639.90535	10	44	68	19	24	4.64	97	54	59.23	32	5	9	2.1	175	273	1.162	4.2	137	3.42	2.4	4.241	76	1.197	3.5	1.16	2	2	19	54	175	4.2
118887	2	64	2	2	5434.515253	5637.339515	10	42	63	17	25	5.36	102	87	64.53	23	4.5	13	11.1	163	285	1.195	3.6	143	5.13	2.4	4.474	65	1.185	4.1	0.902	0	0	17	87	163	3.6
120472	2	59	2	2	13523.71271	14355.2418	10	39	72	16	27	6.07	98	218	92.82	36	4.61	11	9	187	280	1.098	3.5	140	5.13	2.375	7.086	75	0.948	5.7	0.868	1	1	16	218	187	3.5
120352	2	80	2	2	13997.32602	15135.70394	10	48	74	20	26	6.07	103	96	99.89	28	5.66	34	12.4	170	289	1.356	4.1	144	8.55	2.375	5.637	76	1.66	7.9	1.061	2	2	20	96	170	4.1
122550	1	80	2	2	5076.860481	5147.757517	10	39	94	15	24	6.07	101	85	106.96	32	5.61	21	13.4	144	277	0.936	4.1	138	5.13	2.35	5.534	71	2.281	5.6	1.257	0	0	15	85	144	4.1
115159	1	80	2	2	7818.895201	8209.918949	10	35	49	15	28	9.64	102	213	112.27	33	5.27	13	14	166	290	0.969	3.6	143	8.55	2.325	5.844	68	1.005	7.9	0.931	0	0	15	213	166	3.6
115743	2	74	2	2	17196.97526	18741.78209	10	45	69	16	27	3.93	99	84	70.72	39	5.55	29	14.9	163	275	0.969	4.1	138	5.13	2.4	5.12	84	1.547	4.3	0.792	2	2	16	84	163	4.1
112897	2	70	2	2	6104.355081	6874.323676	10	43	50	16	28	2.14	98	92	55.69	29	6.61	16	16.5	141	278	1.324	3.9	140	6.84	2.375	4.991	72	1.005	4.5	0.829	0	0	16	92	141	3.9
112450	2	69	2	2	3977.393244	4137.109017	10	38	104	13	25	3.93	99	87	59.23	34	17.43	22	9.7	153	285	1.033	4.2	137	8.55	2.25	7.034	72	1.795	4	0.997	0	0	13	87	153	4.2
115671	2	67	2	2	16687.37788	17566.78802	10	40	51	13	26	6.43	100	122	69.84	27	6.05	11	7.9	155	280	1.195	3.6	139	8.55	2.425	6.413	67	1.095	4.4	1.2	0	0	13	122	155	3.6
116486	1	66	2	2	5042.906523	5309.793193	10	39	87	NA	29	4.28	105	249	95.47	28	5.61	15	12.4	NA	289	1.066	4.3	145	6.84	2.35	5.146	67	1.118	4.7	0.978	2	2	22	249	164	4.3
122909	2	64	2	2	5270.450688	5804.794117	10	44	80	14	26	3.57	103	74	52.16	34	7.11	21	17.9	172	280	1.001	3.9	140	6.84	2.35	5.741	78	1.163	5.5	1.13	2	2	14	74	172	3.9
112159	1	64	2	2	3140.356692	3234.148553	10	40	76	16	23	3.93	102	110	73.37	38	5.05	20	2	144	277	1.001	3.9	139	11.97	2.3	3.801	78	1.027	6.5	1.307	0	0	16	110	144	3.9
115232	1	64	2	2	2431.173476	2548.355342	10	37	80	20	28	5.36	105	135	91.94	35	5	30	13.8	135	287	1.13	4	144	3.42	2.3	4.732	72	1.942	5.6	1.17	1	1	20	135	135	4
112233	2	63	2	2	4434.282934	4717.066611	10	41	69	15	27	5.71	105	126	76.91	33	4.94	54	13.1	141	287	1.227	4	144	8.55	2.425	3.517	74	1.287	5.8	1.209	1	1	15	126	141	4
118293	2	61	2	2	11800.40827	12037.34319	10	38	118	13	19	17.85	110	167	228.96	35	7.66	16	15.9	129	299	1.195	4.2	142	3.42	2.25	4.215	73	1.321	7.3	1.059	2	2	13	167	129	4.2
112422	2	60	2	2	8456.892774	8803.685447	10	35	89	11	26	13.21	105	66	156.47	44	4	32	7.3	190	292	1.55	4.1	143	1.71	2.375	8.792	79	1.287	9.8	1.485	1	1	11	66	190	4.1
119813	2	60	2	2	14008.87741	14840.417	10	38	138	14	28	4.64	93	55	74.26	40	21.37	14	14.3	120	282	1.227	3.6	133	6.84	2.35	5.637	78	1.626	3.8	0.845	0	0	14	55	120	3.6
112280	2	58	2	2	16621.50564	17421.01605	10	39	170	13	26	3.93	105	77	78.68	32	8.99	19	13.4	144	288	0.807	3.7	143	3.42	2.9	4.732	71	1.852	6	0.734	0	0	13	77	144	3.7
124372	1	80	1	2	15518.99933	19587.71943	10	43	81	13	26	7.14	96	51	78.68	25	5.27	24	21	141	280	1.162	3.4	139	11.97	2.35	3.129	68	0.869	5.2	1.389	2	2	13	51	141	3.4
113000	1	79	1	2	8671.422039	8692.958984	10	45	105	20	26	3.93	100	154	76.02	29	5.66	30	25.4	209	281	1.066	5.1	141	13.68	2.325	4.577	74	0.768	5.3	1.294	NA	3	20	154	209	5.1
112781	2	80	1	2	10800.16543	13500.90298	10	40	75	11	25	8.93	102	39	68.95	29	6	20	14	121	284	1.324	4.6	140	5.13	2.325	6.025	69	3.297	7.9	1.092	1	1	11	39	121	4.6
116625	2	80	1	2	14700.21303	16501.50225	10	39	133	19	27	5	99	121	70.72	29	4.66	10	16.7	227	281	1.356	4	141	6.84	2.3	5.25	68	0.779	5.3	1.026	0	0	19	121	227	4
121945	2	80	1	2	6651.283829	9198.044665	10	43	79	20	25	9.64	102	41	76.02	25	5.77	10	19.7	154	292	1.001	4.4	144	6.84	2.4	4.526	68	1.445	5	0.925	0	0	20	41	154	4.4
110421	2	74	1	2	21800.20226	23557.29834	10	42	79	14	26	5.36	102	49	71.6	30	5.33	25	17.2	169	280	1.162	4	140	6.84	2.325	7.396	72	3.545	3.7	1.272	NA	3	14	49	169	4
119524	2	73	1	2	17053.66605	19807.5709	10	39	101	18	26	7.5	100	164	71.6	28	6.61	6	14.3	NA	284	0.969	3.7	140	5.13	2.325	6.387	67	1.185	5.5	0.712	0	0	18	164	164	3.7
118922	2	72	1	2	11959.7996	13844.74238	10	39	81	17	30	7.5	106	46	78.68	29	5.05	20	14.5	154	293	1.066	4.4	146	5.13	2.225	7.499	68	2.156	5.3	0.991	0	0	17	46	154	4.4
115393	2	64	1	2	9862.038021	11860.76144	10	41	156	15	25	2.86	103	40	74.26	29	4.83	16	22.4	128	277	0.969	3.8	140	8.55	2.7	6	70	1.231	4.6	0.634	2	2	15	40	128	3.8
112953	1	64	1	2	12136.76403	12899.18693	10	43	95	12	24	5.36	104	53	93.7	34	5.33	19	9.3	130	284	1.162	4.1	142	3.42	2.275	5.017	77	1.558	4.6	0.82	0	0	12	53	130	4.1
110328	1	63	1	2	62587.90788	71886.80183	10	40	65	18	26	5.36	104	223	105.2	30	5	22	22.2	173	280	0.969	4.2	140	13.68	2.3	4.707	70	0.824	5.6	0.987	NA	3	18	223	173	4.2
113231	2	62	1	2	15755.41786	16558.35984	10	32	84	12	25	5.71	100	44	70.72	45	5.16	17	7.3	145	275	1.195	3.9	137	5.13	2.2	4.939	77	1.321	3.4	1.165	2	2	12	44	145	3.9
122442	2	62	1	2	97872.32697	107505.1101	10	43	39	19	26	4.64	104	89	59.23	25	4.61	10	5.2	159	286	1.066	4	144	1.71	2.4	4.293	68	0.497	4.3	1.062	2	2	19	89	159	4
117236	1	62	1	2	12364.68654	12739.38583	10	36	83	14	25	4.64	99	30	55.69	35	6.11	14	21.3	153	284	1.066	4.6	142	3.42	2.275	3.801	71	1.366	3.6	0.883	0	0	14	30	153	4.6
110993	1	60	1	2	44535.13455	52102.40116	10	43	88	13	27	5.36	99	138	78.68	29	8.6	11	10.4	196	283	1.066	4	140	5.13	2.35	4.474	72	1.174	3.7	0.994	2	2	13	138	196	4
109416	1	60	1	2	21227.85449	24735.57233	10	39	69	13	25	3.21	93	51	66.3	31	5	23	10.2	148	266	1.195	3.6	134	5.13	2.35	3.957	70	1.434	4.3	0.801	0	0	13	51	148	3.6
109867	1	55	1	2	52389.90656	57595.40423	10	38	71	18	28	5.36	107	89	75.14	30	4.61	79	3.2	132	287	0.807	4.4	144	5.13	2.35	4.681	68	1.761	6	0.878	0	0	18	89	132	4.4
119367	1	75	4	1	13399.11001	13931.66333	10	40	89	15	30	5.36	104	51	78.68	39	6.27	15	23.6	176	290	1.098	4.8	145	6.84	2.475	3.077	79	1.084	6	1.033	0	0	15	51	176	4.8
124656	2	71	4	1	3753.780219	4076.321404	10	40	100	15	22	18.21	104	61	156.47	36	6.72	35	8.8	134	294	1.421	4.9	140	1.71	2.35	6.077	76	1.581	6.7	0.971	0	0	15	61	134	4.9
112767	2	63	4	1	7153.191629	7591.073717	10	39	86	15	25	6.07	102	82	72.49	29	4.94	18	12.7	130	279	1.162	3.8	139	5.13	2.275	3.31	68	2.473	6.8	0.987	2	2	15	82	130	3.8
116384	2	61	4	1	3727.619368	3957.291351	10	40	81	7	26	4.64	103	91	64.53	36	5.94	22	12.4	157	287	1.162	3.9	144	5.13	2.175	4.81	76	1.502	5.2	0.827	NA	3	7	91	157	3.9
109481	1	60	4	1	12020.19908	12228.19848	10	38	64	16	26	6.43	103	55	74.26	31	4.88	26	11.1	144	284	1.066	4.3	142	6.84	2.325	5.56	69	2.619	4.3	0.938	0	0	16	55	144	4.3
118553	2	57	4	1	16146.44354	18576.88235	10	39	60	16	24	6.43	102	59	62.76	38	4.5	8	9.3	164	282	1.098	3.8	141	13.68	2.375	5.353	77	0.79	4.4	0.777	2	2	16	59	164	3.8
112314	2	70	3	1	25006.67092	26576.60944	10	39	48	11	24	4.64	102	47	53.04	27	8.99	14	14.3	123	287	1.356	4.2	142	5.13	2.325	4.189	66	1.727	6.2	1.083	0	0	11	47	123	4.2
124207	2	66	3	1	7777.781045	8211.451225	10	35	94	13	35	8.93	95	91	358.02	33	6.94	46	12.9	228	295	0.969	4.4	145	6.84	2.225	3.724	68	1.535	3.2	1.108	0	0	13	91	228	4.4
113427	2	63	3	1	6852.793623	7549.568101	10	35	104	16	19	7.14	99	77	94.59	42	5.44	15	8.1	140	278	1.098	3.7	138	3.42	2.225	4.008	77	1.276	7.1	0.896	1	1	16	77	140	3.7
113560	2	61	3	1	6094.684478	6443.114566	10	41	73	14	24	3.93	105	54	69.84	29	4.55	13	13.1	173	282	1.324	4.1	142	6.84	2.325	4.189	70	1.152	5.1	0.934	2	2	14	54	173	4.1
118690	1	80	2	1	8379.292707	8488.688655	10	42	61	15	25	4.64	102	69	83.1	26	6.27	16	9.7	183	278	1.162	4.1	139	5.13	2.425	5.612	68	0.971	3.6	0.742	0	0	15	69	183	4.1
113580	2	77	2	1	8096.816059	8826.315481	10	35	73	13	29	6.43	103	73	84.86	23	5.66	15	17.7	132	291	1.227	3.6	145	5.13	2.175	2.25	58	1.027	5.2	1.106	2	2	13	73	132	3.6
123317	2	69	2	1	5285.223211	5569.071764	10	40	120	14	26	5.36	103	78	50.39	29	5.55	24	12.5	159	286	1.162	3.9	143	5.13	2.275	3.879	69	0.587	4.1	1.002	NA	3	14	78	159	3.9
110942	2	68	2	1	5945.655074	6336.992139	10	39	59	19	31	5.71	100	95	81.33	35	5.22	17	17.7	189	282	1.227	3.7	141	13.68	2.325	4.112	74	1.287	6	0.861	2	2	19	95	189	3.7
119465	2	67	2	1	6867.558686	7114.725131	10	44	66	20	26	2.5	95	90	72.49	27	4.55	19	21.5	131	265	1.001	3.8	134	23.94	2.35	6.749	71	0.745	3.3	0.875	2	2	20	90	131	3.8
124471	2	60	2	1	6302.354678	6786.835529	10	39	77	16	26	4.28	104	96	69.84	30	5	13	10	153	288	1.259	3.6	145	8.55	2.25	6.413	69	1.231	4.6	0.97	0	0	16	96	153	3.6
120452	2	58	2	1	7441.979817	8277.270993	10	38	59	12	23	3.21	103	116	59.23	38	5.88	20	8.2	178	282	1.066	3.4	142	5.13	2.325	6.982	76	1.242	5.6	0.994	NA	3	12	116	178	3.4
116387	2	56	2	1	15984.32584	16399.89679	10	28	137	10	20	9.64	106	91	262.55	31	7.88	31	8.6	NA	293	1.324	5.8	143	1.71	2.025	6.025	59	2.868	2.8	1.189	NA	3	10	91	164	5.8
124283	1	51	2	1	10798.1036	11478.30545	10	38	77	14	27	6.07	104	141	100.78	38	5.66	11	18.4	167	287	1.066	4.4	143	6.84	2.2	4.163	76	0.79	4.4	0.934	NA	3	14	141	167	4.4
120329	1	50	2	1	6023.24663	6480.718843	10	41	56	10	29	2.86	103	217	76.02	31	5.16	18	22.4	148	283	1.098	4.5	143	6.84	2.35	4.965	72	0.655	5.6	1.13	2	2	10	217	148	4.5
112852	2	80	1	1	12275.13743	13993.86907	10	40	106	12	26	7.5	103	38	44.2	24	5.83	24	11.1	155	283	1.195	4.1	140	3.42	2.2	5.172	64	1.231	4.1	1.006	2	2	12	38	155	4.1
124580	2	80	1	1	65035.87394	74592.97206	10	37	251	16	28	12.14	99	48	205.97	22	5.27	32	29.7	163	291	1.582	4.1	142	3.42	2.325	3.672	59	0.914	2.8	0.909	2	2	16	48	163	4.1
117682	2	78	1	1	45114.62163	49121.16852	10	43	70	15	28	6.07	97	67	75.14	26	4.88	17	11.3	159	273	1.195	4.4	136	6.84	2.45	6	69	3.376	4.8	0.913	0	0	15	67	159	4.4
114240	2	76	1	1	38593.21498	42894.42441	10	37	78	19	25	5	102	114	52.16	26	5.05	15	14.7	131	276	1.098	3.8	138	5.13	2.175	5.069	63	1.874	4.5	0.835	2	2	19	114	131	3.8
117540	1	69	1	1	135658.3237	151346.3815	10	42	93	15	26	7.85	103	96	121.11	23	5.44	12	15.9	148	286	1.162	3.9	142	10.26	2.35	4.422	65	0.802	5.9	1.196	2	2	15	96	148	3.9
116125	1	69	1	1	20057.07639	22150.20605	10	40	64	19	25	5.36	100	45	95.47	30	6.44	8	25.3	118	279	0.775	4.4	139	8.55	2.2	5.301	70	0.892	4.2	1.004	1	1	19	45	118	4.4
121005	1	66	1	1	20673.41541	22444.91612	10	36	85	12	29	12.85	101	72	187.41	29	5.61	13	12	136	290	0.936	4.6	141	6.84	2.25	3.724	65	1.389	7.9	1.122	1	1	12	72	136	4.6
111698	2	65	1	1	41316.21037	41919.01489	10	36	121	15	26	5.71	98	61	86.63	27	5.11	15	9.3	153	277	1.13	4.1	138	3.42	2.225	5.948	63	2.337	6.5	1.052	2	2	15	61	153	4.1
114389	1	63	1	1	88024.72232	91018.05935	10	38	60	15	25	6.07	108	174	114.92	25	6.88	13	6.1	263	288	0.936	4.1	143	10.26	2.2	4.215	63	1.852	7	1.14	2	2	15	174	263	4.1
112299	2	56	1	1	18333.60005	17912.65927	10	40	90	16	26	2.86	100	80	63.65	31	4.94	9	27	158	273	1.13	3.9	138	8.55	2.4	6.258	71	1.095	3.1	0.991	0	0	16	80	158	3.9
116295	2	78	2	3	8496.628938	9456.58095	9	41	86	20	30	3.93	100	67	80.44	31	5.27	11	13.8	257	286	1.195	2.9	144	6.84	2.225	5.715	72	0.756	2.6	0.968	NA	3	20	67	257	2.9
111882	2	64	4	2	7032.897756	7295.942227	9	34	71	18	25	5.36	102	93	83.98	32	4.83	12	17.6	172	281	1.033	3.6	141	6.84	2.275	3.957	66	0.892	4.4	1.064	0	0	18	93	172	3.6
110849	1	79	4	2	16724.5654	18016.78166	9	40	69	12	24	8.93	96	41	121.11	35	17.21	19	10.7	131	296	1.162	4.7	140	8.55	2.3	4.965	75	1.513	5.1	1.073	0	0	12	41	131	4.7
110310	2	74	4	2	30316.08036	33065.08906	9	40	100	19	25	5	102	83	64.53	31	5.11	9	11.3	185	285	1.388	4.1	143	3.42	2.275	5.198	71	1.344	3.7	0.877	0	0	19	83	185	4.1
121393	2	65	4	2	17226.959	17574.84666	9	40	68	18	25	6.07	102	70	61	32	5.27	18	15.6	140	283	1.324	4.5	141	6.84	2.45	5.819	72	1.456	3.1	0.888	0	0	18	70	140	4.5
119683	2	62	4	2	5081.483328	5354.074064	9	38	76	15	23	5.71	105	198	59.23	37	4.44	28	20.6	186	281	0.904	3.7	141	6.84	2.425	6	75	1.231	6	1.041	NA	3	15	198	186	3.7
120545	2	55	4	2	11918.28767	12683.02966	9	40	83	12	22	4.64	109	53	61.88	34	6.94	11	7.7	128	290	1.259	3.7	145	3.42	2.275	4.267	74	1.852	5.8	0.966	0	0	12	53	128	3.7
111973	2	51	3	2	19873.51887	20333.28553	9	42	99	18	28	3.93	100	220	53.92	33	5.22	24	11.6	192	282	1.098	4.4	142	5.13	2.5	5.456	75	2.823	5.8	0.953	NA	3	18	220	192	4.4
120041	1	62	2	2	3973.737589	4259.158448	9	39	55	12	24	5	104	59	82.21	30	6.33	12	12.5	129	284	1.162	3.5	142	8.55	2.3	4.215	69	0.994	5	1.185	0	0	12	59	129	3.5
116200	1	62	2	2	4160.356577	4441.921032	9	38	84	18	29	3.93	100	121	104.31	38	5.22	16	7	184	284	1.098	4.9	143	3.42	2.475	4.189	76	1.264	6.1	1.136	0	0	18	121	184	4.9
119230	2	61	2	2	7766.864299	8078.749661	9	42	111	14	25	8.57	105	75	69.84	34	5.11	19	12.9	132	291	1.453	4.4	144	1.71	2.45	7.086	76	2.574	4.7	0.866	NA	3	14	75	132	4.4
117091	1	51	2	2	14858.66378	16674.04305	9	40	90	14	23	5	102	187	122.88	34	4.61	22	15.4	122	281	1.098	4.2	141	17.1	2.375	4.396	74	1.253	6.2	0.873	0	0	14	187	122	4.2
124132	2	80	2	2	5494.833788	6061.427832	9	38	79	17	26	6.78	104	118	118.46	34	7.99	15	10.7	173	286	1.227	4.4	141	6.84	2.3	3.827	72	1.547	7.5	1.053	0	0	17	118	173	4.4
115215	2	72	2	2	15944.08505	17887.70168	9	36	104	14	25	5.36	103	39	96.36	41	4.88	17	26.9	172	282	1.098	4	141	5.13	2.35	4.138	77	1.355	6.2	1.027	0	0	14	39	172	4
120567	1	71	2	2	9097.371345	9746.511076	9	38	73	15	26	4.64	101	116	83.1	26	5.66	17	10	147	282	0.807	4.3	141	3.42	2.2	4.5	64	1.174	5.5	1.075	0	0	15	116	147	4.3
111343	2	67	2	2	9901.908065	10307.95663	9	34	45	11	23	3.21	101	65	68.95	39	6.05	8	15.9	147	277	1.324	3.4	139	17.1	2.35	5.172	73	1.253	5.5	1.041	1	1	11	65	147	3.4
119711	2	67	2	2	3761.545258	3928.884665	9	37	99	13	24	5	102	81	88.4	36	4.94	24	22.4	168	283	1.259	3.6	142	8.55	2.3	5.974	73	0.948	4.1	0.878	0	0	13	81	168	3.6
118520	2	64	2	2	4835.628205	5050.75021	9	43	68	15	24	3.93	100	75	72.49	43	3.72	17	12.4	131	281	1.098	3.8	142	8.55	2.375	3.62	86	0.79	5.1	0.898	0	0	15	75	131	3.8
109316	2	62	2	2	6119.732139	6448.398885	9	37	133	10	20	5	101	53	67.18	32	6.38	12	7.3	139	279	1.13	3.9	139	5.13	2.25	4.707	69	0.621	3.6	0.786	0	0	10	53	139	3.9
117064	2	61	2	2	13919.66656	14653.22075	9	38	89	14	27	4.28	103	134	67.18	34	5	14	10.2	116	279	1.162	4.2	140	3.42	2.325	4.707	72	1.14	5.6	1.251	0	0	14	134	116	4.2
110161	2	52	2	2	18628.09588	20718.92178	9	34	84	16	27	4.28	102	116	71.6	36	4.55	8	8.1	154	278	1.033	3.7	140	5.13	2.25	5.456	70	1.129	5.3	1.122	0	0	16	116	154	3.7
122783	2	71	1	2	16266.73395	17679.58916	9	37	117	14	24	4.28	106	99	76.91	29	5.05	9	9	190	284	1.324	3.6	143	3.42	2.2	7.034	66	0.734	4.2	0.7	0	0	14	99	190	3.6
120131	1	50	1	2	11410.50037	12645.53634	9	39	77	18	26	4.64	102	221	98.12	26	4.66	18	11.8	163	279	1.388	4.2	140	5.13	2.25	5.094	65	0.914	4.6	0.799	0	0	18	221	163	4.2
119889	2	80	1	2	25944.74644	31376.60383	9	46	91	16	25	6.43	102	137	58.34	24	8.99	16	10.9	166	294	0.904	3.2	145	8.55	2.375	3.284	70	1.581	4.3	1.135	1	1	16	137	166	3.2
121294	2	80	1	2	7334.056198	8309.3838	9	37	79	15	27	3.21	97	73	69.84	32	5.38	8	17	197	276	1.421	3.8	139	13.68	2.175	3.982	69	0.982	4.3	0.914	2	2	15	73	197	3.8
114106	2	75	1	2	17045.97935	18420.75896	9	36	82	12	25	8.57	101	37	69.84	25	9.66	14	8.2	117	286	1.55	4.2	139	5.13	2.275	7.241	61	2.123	4	0.836	2	2	12	37	117	4.2
119364	2	73	1	2	72297.61658	80074.20605	9	44	77	14	22	2.86	101	57	61	24	6.05	10	18.4	151	276	1.195	3.3	139	6.84	2.325	6.724	68	2.348	4.7	1.067	2	2	14	57	151	3.3
112646	1	70	1	2	8351.936626	8995.950792	9	41	74	12	27	5.36	101	52	80.44	32	4.39	24	10.2	153	285	1.55	4.2	143	3.42	2.45	4.732	73	4.245	6	1.015	0	0	12	52	153	4.2
123484	2	60	1	2	42912.06207	43443.21648	9	41	60	15	25	4.28	102	60	59.23	32	4.66	9	8.4	117	280	1.098	4.2	141	5.13	2.3	4.474	73	0.858	4	0.836	0	0	15	60	117	4.2
121692	1	58	1	2	22012.67222	22637.15775	9	40	75	14	29	9.64	102	116	108.73	32	5.33	11	9.3	187	292	1.195	4.1	144	8.55	2.275	3.776	72	0.677	5.5	0.868	2	2	14	116	187	4.1
115426	2	75	4	1	12142.36288	12571.68348	9	41	56	12	26	7.14	99	64	56.58	36	4.94	18	12.4	123	283	1.324	3.9	141	13.68	2.425	3.957	77	1.569	6.7	0.877	0	0	12	64	123	3.9
110953	2	64	4	1	12633.80267	13510.70059	9	39	112	17	26	6.07	98	97	54.81	34	5.16	26	9.7	158	282	1.388	4.2	141	1.71	2.325	5.069	73	2.314	3.9	0.695	2	2	17	97	158	4.2
115714	1	61	4	1	10155.89415	10916.09407	9	43	69	18	25	6.78	102	120	69.84	31	4.94	23	18.6	159	279	0.872	3.5	139	3.42	2.2	5.922	74	2.834	4.9	1.055	0	0	18	120	159	3.5
122717	2	57	4	1	40703.93625	46201.2155	9	37	100	13	23	3.21	104	49	59.23	31	6	17	7.7	160	279	0.872	4.1	140	5.13	2.35	8.586	68	2.416	4.6	0.907	1	1	13	49	160	4.1
111716	2	55	4	1	8753.24852	9879.727529	9	41	101	16	21	6.07	99	77	57.46	40	4.77	24	3.8	127	275	1.388	3.9	137	5.13	2.4	5.094	81	2.687	4	0.919	0	0	16	77	127	3.9
122713	2	54	4	1	5208.170525	5183.868822	9	40	79	10	25	7.5	104	68	82.21	26	7.05	17	9	134	293	1.292	4.1	145	5.13	2.2	3.879	66	0.474	4.7	1.115	1	1	10	68	134	4.1
111299	2	50	4	1	15271.50617	15096.88557	9	39	102	12	23	5.71	101	50	99.89	37	6	34	14	137	276	1.033	3.7	137	8.55	2.325	3.957	76	0.689	7.1	0.948	2	2	12	50	137	3.7
111717	2	56	3	1	14254.96765	15688.31961	9	40	103	12	24	10.71	103	65	54.81	27	4	11	20.4	142	284	1.162	4.1	140	5.13	2.15	6.051	67	1.298	2.3	0.916	1	1	12	65	142	4.1
114169	1	71	2	1	10264.86504	10398.87809	9	42	71	15	31	5	97	93	91.05	31	8.16	30	11.8	144	283	1.259	4.4	140	5.13	2.475	5.482	73	0.655	3.3	1.497	0	0	15	93	144	4.4
120862	1	66	2	1	8212.50663	8768.312343	9	43	45	15	26	3.21	101	148	84.86	26	4.94	19	21.3	133	276	1.292	3.7	139	6.84	2.325	5.793	69	1.061	4.6	0.976	1	1	15	148	133	3.7
123983	1	65	2	1	10668.439	11191.2373	9	40	79	12	31	5	100	162	99.89	30	6.88	15	10.7	141	281	0.807	3.6	140	6.84	2.325	3.129	70	2.281	8.1	0.938	0	0	12	162	141	3.6
113404	1	60	2	1	2822.998618	2924.517758	9	43	88	13	22	6.78	100	94	143.21	30	7.55	24	15.2	123	276	0.969	4.3	136	6.84	2.425	3.75	73	1.05	7.5	1.134	0	0	13	94	123	4.3
120393	2	58	2	1	23586.85837	25641.62592	9	41	117	17	31	3.93	100	96	71.6	30	4.77	18	15	158	276	0.904	3.6	139	5.13	2.675	5.974	71	1.005	6.8	1.005	0	0	17	96	158	3.6
117289	2	57	2	1	32802.01222	33927.84854	9	47	72	12	25	4.64	103	140	75.14	28	4.77	21	17.4	190	286	1.195	4.6	144	5.13	2.4	5.25	75	0.7	4.3	0.944	2	2	12	140	190	4.6
110940	2	55	2	1	14452.09096	15235.90156	9	35	90	14	24	2.5	102	136	68.95	39	4.88	38	11.8	165	281	1.162	4.3	142	3.42	2.25	6.284	74	0.847	5.4	0.75	2	2	14	136	165	4.3
112703	1	52	2	1	7736.247656	8668.957267	9	41	79	12	27	4.64	104	259	103.43	30	4.61	19	19	221	286	0.969	3.6	144	6.84	2.375	3.957	71	1.084	5.2	1.274	0	0	12	259	221	3.6
113448	2	51	2	1	9657.282579	10384.9148	9	36	49	16	22	4.64	107	226	81.33	35	4.72	10	3.2	157	281	0.904	4	141	5.13	2.2	5.327	71	0.869	4	1.067	2	2	16	226	157	4
110894	2	50	2	1	8236.513574	8443.384829	9	37	54	11	23	4.64	104	88	63.65	31	4.66	24	15.4	208	279	0.775	3.5	140	10.26	2.15	4.681	68	1.016	3.2	1.284	0	0	11	88	208	3.5
116216	2	80	1	1	18357.32012	21348.37726	9	41	90	13	29	6.43	98	56	77.79	29	5.55	23	16.1	137	280	0.872	4.5	139	5.13	2.55	3.517	70	1.614	7.9	0.838	2	2	13	56	137	4.5
120691	2	80	1	1	22810.64651	24214.34526	9	42	52	21	25	7.85	97	110	96.36	32	4.88	11	14	186	277	1.195	4	137	3.42	2.375	6.31	74	1.084	4.8	0.656	0	0	21	110	186	4
118387	1	80	1	1	15075.86847	17234.52112	9	40	98	11	24	7.5	104	46	109.62	30	8.1	7	17.9	137	285	1.033	5.5	140	6.84	2.3	3.439	70	0.937	6.3	1.065	2	2	11	46	137	5.5
121334	2	69	1	1	24384.75634	24881.62715	9	43	55	17	25	3.57	98	67	71.6	27	4.77	5	11.1	134	276	1.421	3.8	139	5.13	2.25	6.775	70	1.208	4.2	0.799	1	1	17	67	134	3.8
116335	1	61	1	1	26440.25811	30807.81865	9	41	77	11	25	11.78	98	62	108.73	36	10.94	20	11.5	120	285	1.066	5	136	6.84	2.5	3.879	77	2.653	9.8	1.124	0	0	11	62	120	5
122502	2	60	1	1	20523.64969	21213.40251	9	38	107	15	29	3.57	99	81	62.76	30	5.27	11	8.8	200	286	1.066	4.3	144	6.84	2.325	6.491	68	1.039	5.4	0.948	0	0	15	81	200	4.3
123852	2	60	1	1	76706.00107	78595.63477	9	43	67	16	24	5.36	104	108	63.65	30	4.94	7	28.3	156	283	1.162	4.3	142	10.26	2.375	5.353	73	1.185	3.3	0.864	2	2	16	108	156	4.3
112427	2	52	1	1	20358.42124	23139.76929	9	42	66	11	26	2.86	99	59	64.53	28	3.94	10	26.5	145	271	1.13	3.6	137	3.42	2.35	6.284	70	1.603	3.3	0.993	0	0	11	59	145	3.6
120109	2	77	4	2	21782.87182	23807.81601	8	40	56	14	29	5.71	102	56	70.72	34	5.55	9	10.4	112	290	1.227	4.3	145	5.13	2.425	4.344	74	2.134	5.6	0.789	2	2	14	56	112	4.3
116138	2	71	4	2	16329.01634	18233.82149	8	37	81	17	23	6.07	105	54	90.17	28	5.33	17	13.3	182	281	1.162	3.8	140	5.13	2.275	4.784	65	0.655	6	0.857	2	2	17	54	182	3.8
118120	2	80	4	2	7485.231979	7756.844834	8	37	103	16	29	6.43	99	47	64.53	35	4.83	11	21.9	112	273	1.259	4.3	136	6.84	2.375	5.224	72	0.948	7.1	0.649	NA	3	16	47	112	4.3
115012	2	72	4	2	6820.980782	7480.279512	8	33	42	6	27	20.35	93	17	968.86	32	9.49	14	8.2	188	301	1.776	4.3	141	5.13	2.15	6.181	65	3.839	6.6	1.079	2	2	6	17	188	4.3
110038	2	58	4	2	11463.36586	11787.80831	8	38	107	17	25	8.21	105	41	62.76	35	5.05	20	11.8	126	292	1.421	3.9	145	5.13	2.35	5.327	73	2.269	5.2	0.709	2	2	17	41	126	3.9
118140	2	54	4	2	8953.951083	9491.602196	8	37	66	11	25	2.86	102	74	66.3	27	5.11	33	15	160	276	0.969	4.1	139	3.42	2.425	4.396	64	1.366	5.1	1.307	0	0	11	74	160	4.1
120794	1	51	2	2	7402.381248	7653.934356	8	43	44	18	28	3.57	101	137	83.1	26	4.83	9	8.2	133	280	1.162	4.1	141	1.71	2.25	4.836	69	1.118	2.4	1.103	0	0	18	137	133	4.1
123626	2	80	2	2	9728.394651	10973.42335	8	38	46	16	25	11.42	103	73	230.72	31	5.38	10	12.9	156	290	1.227	4.2	142	10.26	2.35	3.776	69	0.914	9.2	0.997	0	0	16	73	156	4.2
120096	2	71	2	2	15791.21136	17572.11212	8	41	157	26	23	6.43	108	50	100.78	27	4.94	37	10.7	183	294	1.195	3.9	147	15.39	2.325	6.077	68	1.558	6.5	1.194	0	0	26	50	183	3.9
115746	2	70	2	2	8140.50743	9051.566546	8	41	74	20	29	3.93	102	96	78.68	34	4.61	12	9.5	174	284	1.098	3.7	143	8.55	2.475	4.81	75	0.869	7.6	1.175	2	2	20	96	174	3.7
116070	2	70	2	2	8961.109987	9972.951083	8	40	60	13	23	4.28	104	63	76.02	28	5.44	11	9.5	129	281	1.421	3.9	141	6.84	2.375	4.629	68	1.073	7.3	1.057	0	0	13	63	129	3.9
122517	2	67	2	2	10160.16285	10612.15678	8	36	92	12	24	3.21	100	39	72.49	31	6.49	18	13.3	172	281	1.162	3.6	141	5.13	2.325	6.491	67	1.547	5.4	1.094	1	1	12	39	172	3.6
115518	2	63	2	2	9230.09169	9777.971899	8	30	83	13	28	6.43	99	60	101.66	53	6.27	28	10.9	184	284	1.195	3	141	8.55	2.1	4.344	83	1.095	9.4	0.938	NA	3	13	60	184	3
114769	2	61	2	2	5081.483328	5354.074064	8	41	74	14	23	6.43	104	74	85.75	31	4.61	18	9.9	137	280	1.388	4	140	5.13	2.475	6.543	72	0.847	6	1.186	NA	3	14	74	137	4
120063	1	63	1	2	35918.78885	40652.65787	8	40	120	13	23	7.85	104	141	61.88	30	6.22	17	10	135	283	0.872	4.3	140	6.84	2.35	3.155	70	1.118	5.8	0.927	0	0	13	141	135	4.3
114686	2	80	1	2	19571.3684	22984.73015	8	36	96	18	18	6.43	110	54	121.99	33	6.11	12	9.7	165	284	0.872	4.8	141	8.55	2.025	3.879	69	2.145	5.2	1.191	NA	3	18	54	165	4.8
117349	1	80	1	2	5280.883803	5521.038603	8	41	90	21	21	9.64	101	137	106.96	40	5.27	16	18.3	NA	284	1.227	3.9	140	37.62	2.4	3.414	81	0.677	5.1	1.165	0	0	21	137	164	3.9
116884	1	68	1	2	32924.75649	37703.36637	8	39	114	21	26	3.93	102	150	65.42	33	5.05	18	12.9	158	278	1.098	4.1	140	5.13	2.2	4.577	72	1.377	4.6	0.911	2	2	21	150	158	4.1
123021	2	60	1	2	70737.19512	77221.2241	8	44	84	12	30	3.57	101	36	60.11	28	4.55	25	8.2	152	281	1.162	3.8	142	5.13	2.25	5.793	72	1.535	4.8	0.866	2	2	12	36	152	3.8
114334	2	51	1	2	22603.77474	23264.7351	8	38	61	17	24	2.5	93	121	60.11	30	4.39	43	18.8	191	261	1.292	3.6	132	3.42	2.35	6.672	68	1.039	2.9	0.825	0	0	17	121	191	3.6
110264	1	63	4	1	2735.244816	2922.981669	8	40	90	15	26	4.64	101	200	80.44	40	6	21	10.4	142	280	1.066	3.8	140	5.13	2.4	6	80	1.31	6.2	0.976	0	0	15	200	142	3.8
117856	2	50	4	1	19376.59171	20416.80675	8	44	94	17	27	2.86	101	59	37.13	40	5	14	7.9	166	285	1.453	3.3	144	5.13	2.35	4.551	84	0.632	3.1	0.794	0	0	17	59	166	3.3
111840	1	80	3	1	25784.75027	27626.53294	8	34	70	11	28	3.93	103	21	89.28	35	5.44	10	9.5	116	277	1.066	5	139	6.84	2.175	3.517	69	1.084	5	0.853	0	0	11	21	116	5
123619	1	61	3	1	3348.552622	3604.62834	8	38	52	17	23	4.28	107	102	58.34	28	5	16	14.9	166	284	0.84	4.3	143	8.55	2.175	3.414	66	1.016	5.9	0.861	0	0	17	102	166	4.3
120440	2	55	3	1	12792.7861	13317.08741	8	43	85	13	25	6.07	100	80	53.92	29	5.16	11	10.6	120	282	1.324	4.2	141	3.42	2.3	7.396	72	3.319	5.2	0.93	0	0	13	80	120	4.2
116867	2	52	3	1	13457.4769	13547.88815	8	37	57	15	23	3.57	105	68	65.42	34	4.88	5	3.2	134	276	0.969	4.1	139	3.42	2.2	4.707	71	1.355	3.4	1.246	2	2	15	68	134	4.1
113246	2	77	2	1	13333.31396	14709.87918	8	37	65	19	27	4.28	100	105	91.05	38	5.44	38	11.5	195	275	1.227	3.8	138	8.55	2.225	5.612	75	1.321	4.1	0.897	0	0	19	105	195	3.8
118308	1	65	2	1	3496.627668	3685.535167	8	39	73	23	22	3.57	99	169	76.91	43	4.27	20	24.2	117	272	1.13	4.1	137	8.55	2.35	5.25	82	0.914	7.9	0.776	0	0	23	169	117	4.1
120791	2	64	2	1	3907.416651	4084.908385	8	43	83	13	25	2.86	103	56	56.58	29	5.11	8	13.1	146	281	0.936	4	142	3.42	2.625	5.819	72	1.694	2.9	0.91	1	1	13	56	146	4
123798	2	73	1	1	32306.50627	35346.20253	8	39	77	18	26	6.07	102	132	65.42	32	5.44	11	13.1	170	285	1.162	3.7	142	5.13	2.275	5.56	71	1.185	3.3	0.822	2	2	18	132	170	3.7
118877	2	59	1	1	17293.48478	17524.64004	8	45	127	12	22	5.36	103	79	85.75	27	5.11	22	16.8	134	282	1.292	3.7	141	6.84	2.425	5.663	72	1.332	6.3	1.006	0	0	12	79	134	3.7
120273	2	55	1	1	25071.29091	26497.1909	8	40	114	21	23	2.86	95	63	47.74	36	4.66	46	22.9	155	264	1.324	4.1	133	6.84	2.35	5.819	76	2.314	5.3	0.975	0	0	21	63	155	4.1
111705	2	54	3	2	26103.03872	28286.16898	7	35	98	11	21	4.64	104	41	58.34	39	3.72	7	7.3	159	280	1.292	4.2	141	3.42	2.2	4.991	74	0.869	4.4	0.829	1	1	11	41	159	4.2
121260	2	75	3	2	9014.82623	9713.73163	7	36	130	11	28	4.64	100	40	66.3	37	5.11	14	12.2	140	274	1.098	4.4	137	5.13	2.45	5.689	73	2.473	4.3	0.864	2	2	11	40	140	4.4
115334	1	73	2	2	4231.105558	4512.055845	7	45	101	16	28	3.93	99	127	95.47	32	5.55	13	21.9	118	275	1.162	3.9	138	8.55	2.3	5.069	77	0.96	5.9	0.982	0	0	16	127	118	3.9
111246	1	61	2	2	6182.929248	6632.977112	7	34	106	10	26	3.93	104	96	134.37	35	8.27	17	12.2	169	285	1.066	4.7	142	5.13	2.5	3.31	69	2.303	7.4	1.294	2	2	10	96	169	4.7
123261	2	50	2	2	8056.493886	8330.519614	7	34	77	14	25	5.71	102	167	89.28	33	4.88	10	9.1	188	284	1.356	3.8	142	6.84	2.3	2.922	67	1.535	8.1	1.264	NA	3	14	167	188	3.8
121693	2	80	2	2	13635.46392	14934.24551	7	40	138	9	25	6.78	100	25	83.98	37	9.44	42	22.6	126	284	0.904	3.9	139	5.13	2.6	5.482	77	1.231	4.3	0.735	2	2	9	25	126	3.9
120340	2	78	2	2	15358.14365	17076.97714	7	40	93	16	24	3.57	104	55	55.69	36	6.11	22	6.1	NA	292	1.033	4	147	5.13	2.35	5.612	76	0.779	5.4	1.283	0	0	16	55	164	4
112515	2	78	2	2	11528.52664	12779.64385	7	38	77	20	26	8.93	101	78	195.36	32	4.61	25	10.7	179	283	1.195	4.2	140	5.13	2.25	3.465	70	1.253	7.8	1.126	0	0	20	78	179	4.2
124197	1	69	2	2	5565.882636	5838.634255	7	43	49	12	23	5	91	124	82.21	34	5.16	23	3.4	160	263	1.162	4.4	131	6.84	2.475	4.5	77	0.587	5.4	0.904	0	0	12	124	160	4.4
114182	2	67	2	2	3802.085046	3928.718145	7	36	52	12	24	5.36	109	337	87.52	32	4.55	19	12.7	239	287	0.872	4.1	144	5.13	2.25	3.776	68	0.768	5.7	0.924	2	2	12	337	239	4.1
117635	2	65	2	2	10029.0028	10341.06588	7	39	102	13	27	4.28	98	66	74.26	29	6	20	7.9	153	278	1.485	3.5	139	5.13	2.275	3.75	68	0.96	6.9	0.761	0	0	13	66	153	3.5
116799	2	57	1	2	48412.04929	51623.32028	7	37	99	12	25	5	101	55	76.91	31	4.88	20	9	148	279	1.292	4.4	140	3.42	2.275	5.043	68	1.648	4.3	0.959	2	2	12	55	148	4.4
122188	2	54	4	1	8578.10512	10070.19275	7	42	50	21	26	6.07	105	272	63.65	29	4.72	14	19.7	171	286	1.098	3.7	143	13.68	2.25	5.275	71	0.948	5.6	0.903	2	2	21	272	171	3.7
115759	2	53	4	1	7456.311205	8351.036201	7	41	74	20	25	5.71	99	132	55.69	32	5	25	20.2	156	276	1.195	3.4	138	8.55	2.35	6.491	73	1.163	4.4	0.956	1	1	20	132	156	3.4
117999	2	52	3	1	19423.34691	18808.89514	7	41	69	15	23	5.36	99	77	65.42	33	5.83	15	9.7	151	271	1.388	4.3	135	3.42	2.35	6.232	74	1.897	5	1.002	2	2	15	77	151	4.3
119157	2	74	2	1	10048.02222	11155.5601	7	34	83	10	26	8.57	96	78	108.73	38	7.16	19	7.2	156	285	1.098	3.7	140	5.13	2.425	3.905	72	1.423	5.9	1.255	2	2	10	78	156	3.7
119267	2	80	1	1	7209.790548	8164.206751	7	38	80	14	27	7.5	99	29	95.47	39	6	10	11.6	149	285	1.195	4	141	8.55	2.325	5.508	77	1.614	6.3	1.044	2	2	14	29	149	4
109774	2	80	1	1	36636.6536	44313.76586	7	43	109	17	27	5	98	74	46.85	31	5.11	32	15.9	167	276	1.227	4.8	138	6.84	2.35	6.206	74	1.106	4.2	1.003	0	0	17	74	167	4.8
124002	2	80	1	1	37439.55058	42157.93365	7	37	93	15	28	8.21	99	50	93.7	34	4.5	14	14.1	149	284	1.227	4.1	141	6.84	2.375	5.637	71	2.077	5.8	0.565	2	2	15	50	149	4.1
111255	1	78	1	1	37672.88291	43120.29358	7	34	74	13	27	4.28	98	44	71.6	30	5.61	12	7.9	152	277	1.001	4.6	139	5.13	2.2	5.301	64	0.835	4.9	0.794	0	0	13	44	152	4.6
123535	1	61	1	1	11061.11367	11709.85528	7	38	98	9	25	4.64	99	43	98.12	29	4.72	15	13.6	67	279	1.098	4.9	140	6.84	2.4	2.198	67	1.806	7.8	1.03	2	2	9	43	67	4.9
116533	2	50	1	1	24954.83884	27638.49459	7	35	96	14	21	4.64	105	79	73.37	34	4.39	6	5.2	141	280	1.421	4.5	141	3.42	2.175	5.25	69	1.084	4.2	0.791	1	1	14	79	141	4.5
119814	2	71	2	2	8803.877592	9759.306076	6	36	122	9	27	5.71	100	106	83.1	30	12.1	17	12.7	235	285	1.227	4.4	139	10.26	2.15	4.448	66	0.835	4	0.771	0	0	9	106	235	4.4
109742	1	80	1	2	14062.71936	17577.35699	6	44	68	13	24	5.36	99	94	76.91	31	7.16	23	23.6	111	278	1.033	4.1	138	6.84	2.325	3.439	75	2.969	7	0.903	2	2	13	94	111	4.1
110915	2	80	2	1	14383.51816	16268.58759	6	36	77	14	26	8.57	99	100	123.76	37	5.27	17	7	180	276	1.356	4.7	136	5.13	2.375	5.379	73	0.621	5.8	1.002	2	2	14	100	180	4.7
124340	2	74	2	1	12837.2211	14103.84304	6	37	79	15	28	7.14	104	77	126.41	26	5	8	8.8	154	283	1.356	4.2	141	3.42	2.15	5.069	63	1.14	5.1	0.959	2	2	15	77	154	4.2
119293	1	68	2	1	8672.513581	9097.50316	6	38	299	13	29	2.5	99	130	90.17	38	5.94	17	24.5	103	278	1.162	4.1	140	17.1	2.325	3.801	76	0.813	4.9	0.853	0	0	13	130	103	4.1
124178	1	54	2	1	10147.46827	10507.23385	6	40	61	14	24	3.21	106	343	112.27	28	5.16	22	17.4	242	282	1.033	4	142	6.84	2.225	4.5	68	1.897	8.7	1.27	NA	3	14	343	242	4
124205	2	60	4	2	8022.097892	8505.536195	5	39	100	17	27	5.71	102	65	65.42	37	5.44	21	11.6	143	284	1.324	4	142	8.55	2.375	5.767	76	2.789	5.6	1.164	NA	3	17	65	143	4
122963	2	56	4	1	12666.1816	13488.47914	5	45	108	22	28	4.64	97	91	52.16	35	4.39	12	7	143	273	1.066	3.8	137	5.13	2.425	4.293	80	1.581	3.8	0.678	1	1	22	91	143	3.8
118271	2	61	2	2	2272.872614	2376.116302	4	31	123	10	27	9.28	95	75	382.77	44	6.44	32	6.6	119	283	1.388	3.7	139	5.13	2.075	2.25	75	0.598	3.5	0.973	0	0	10	75	119	3.7
114963	1	74	4	1	17184.36355	18998.91887	3	36	95	14	28	6.07	103	89	116.69	36	5.11	10	19.5	127	290	1.195	4	145	6.84	2.275	4.344	72	1.332	6.1	1.349	0	0	14	89	127	4
